# Supplementary material for: UBR-1 deficiency leads to ivermectin resistance in Caenorhabditis elegans
Source: eLife journal article supplement (doi:10.7554/elife.103718), 2024-12-13
Supplement: data1 [file elife-103718-data1-v1.zip]

## Sheet: Sheet1
ubr-1;+UBR 5-HT											ubr-1;+UBR 5-HT+IVM											ubr-1;got-1 5-HT											ubr-1;got-1 5-HT+IVM											ubr-1;eat-4 5-HT
1.04139	1.0715	1.03015	1.0267	1.11628	1.33753	1.04135	1.03128	1.02845	1.02764		1.04342	1.09903	1.25136	1.19589	1.14151	1.18358	1.27247	1.69499	1.04157	1.24277		1.16337	1.10196	1.11408	1.18359	1.11833	1.13424	1.01871	1.14032	1.30155	1.05551		1.2438	1.09649	1.18599	1.14462	1.09234	1.04839	1.19966	1.06823	1.15327	1.07869		1.1417	1.06307	1.1541	1.03254	1.0245	1.07589
1.04621	1.02113	1.02901	1.01868	1.24425	1.41607	1.05502	1.04231	1.05903	1.02703		1.0438	1.09949	1.25457	1.19542	1.15224	1.18211	1.23848	1.73829	1.03937	1.24218		1.12082	1.08581	1.13633	1.1582	1.07844	1.126	1.01948	1.13868	1.32002	1.0668		1.24042	1.09641	1.18302	1.15992	1.07594	1.05307	1.19383	1.04708	1.14471	1.09864		1.10836	1.06643	1.15362	1.06863	1.02948	1.07103
1.02525	1.06236	1.04482	1.03194	1.24327	1.43138	1.02838	1.03248	1.03006	1.02731		1.05023	1.10224	1.24981	1.19436	1.14329	1.17775	1.24819	1.69966	1.04374	1.24278		1.07572	1.08831	1.14007	1.16754	1.10017	1.03859	1.02778	1.1564	1.3122	1.06009		1.22539	1.12249	1.18937	1.15796	1.06909	1.05272	1.19944	1.05402	1.1447	1.07702		1.09042	1.06864	1.1686	1.0562	1.04595	1.07103
1.03774	1.04951	1.02767	1.01238	1.25058	1.40737	1.05147	1.02551	1.04485	1.0218		1.04909	1.09607	1.25582	1.19305	1.14795	1.17075	1.26774	1.68835	1.04083	1.24294		1.19308	1.08147	1.11198	1.15813	1.14319	1.0984	1	1.14681	1.30772	1.05476		1.23078	1.11519	1.18954	1.16096	1.06834	1.05204	1.19412	1.0682	1.17157	1.0953		1.1169	1.07128	1.16936	1.08035	1.04313	1.08078
1.04822	1.08476	1.05061	1.0245	1.23697	1.4435	1.02992	1.03435	1.0336	1.03316		1.05029	1.09327	1.2588	1.19432	1.15813	1.16934	1.24521	1.71688	1.03878	1.24227		1.39201	1.10539	1.11471	1.18226	1.11061	1.09305	1.02588	1.15792	1.29433	1.04682		1.22522	1.10631	1.18949	1.16679	1.06196	1.05019	1.17954	1.07356	1.14994	1.10104		1.10095	1.06073	1.17167	1.09888	1.04399	1.08078
1.03809	1.05837	1.04277	1.01409	1.13772	1.3987	1.03359	1.04793	1.0642	1.03066		1.04721	1.11296	1.26104	1.19319	1.15033	1.16881	1.257	1.7365	1.04081	1.24301		1.45365	1.11679	1.09188	1.19624	1.11837	1.0757	1.02391	1.16709	1.27558	1.04499		1.22949	1.10571	1.18792	1.15888	1.07689	1.0629	1.2061	1.0594	1.14306	1.10813		1.02379	1.05227	1.17487	1.05158	1.03095	1.07438
1.0357	1.08132	1.026	1.02405	1.14638	1.38236	1.02817	1.03116	1.0582	1.03456		1.04824	1.10936	1.26539	1.19453	1.16687	1.16366	1.23304	1.69857	1.04265	1.24116		1.3429	1.11482	1.08897	1.18582	1.12123	1.08452	1.02591	1.1578	1.26281	1.02184		1.23318	1.11239	1.18849	1.16525	1.07212	1.05629	1.21511	1.06401	1.12606	1.11875		1.09366	1.05622	1.16728	1.04966	1.0185	1.07438
1.03008	1.1357	1.0261	1.00916	1.10712	1.36677	1.19097	1.03282	1.06128	1.02848		1.05274	1.11044	1.26752	1.19492	1.13328	1.16209	1.2289	1.73161	1.04019	1.23983		1.38009	1.14225	1.09521	1.1702	1.12573	1.03845	1.0249	1.13924	1.23875	1.04768		1.23443	1.12061	1.19245	1.16192	1.07454	1.05364	1.18955	1.06987	1.12198	1.11139		1.12555	1.06712	1.17986	1.05906	1.02817	1.07183
1.04	1.15039	1.0301	1.00093	1.07283	1.36799	1.18207	1.04043	1.04844	1.02587		1.05069	1.11198	1.27128	1.19413	1.15801	1.15926	1.21647	1.72735	1.04229	1.24001		1.14227	1.20537	1.09522	1.18382	1.10625	1.12036	1.02943	1.16515	1.22128	1.04566		1.23757	1.1207	1.19175	1.15461	1.07956	1.0517	1.16364	1.06701	1.06958	1.09537		1.06621	1.05731	1.17754	1.07018	1.04485	1.07183
1.03893	1.14658	1.04231	1.02463	1.07565	1.35049	1.1406	1.03996	1.06376	1.02232		1.04751	1.10144	1.27367	1.19271	1.15336	1.15099	1.27307	1.7052	1.04161	1.24112		1.22228	1.25731	1.09423	1.18382	1.0951	1.15719	1.03056	1.12406	1.20692	1.05687		1.23626	1.11217	1.19045	1.16527	1.06813	1.05884	1.21577	1.06376	1.12169	1.14273		1.10113	1.06417	1.18409	1.04762	1.04547	1.08228
1.0317	1.17099	1.05101	1	1.20841	1.42228	1.14333	1.04636	1.02342	1.03666		1.04544	1.10176	1.2756	1.19173	1.13794	1.14666	1.22966	1.70179	1.03838	1.24079		1.26012	1.23705	1.10157	1.1668	1.08651	1.14553	1.02318	1.14501	1.19248	1.05043		1.23805	1.12667	1.19299	1.15609	1.0802	1.0606	1.19512	1.0618	1.10109	1.07864		1.08017	1.06231	1.16994	1.05864	1.04602	1.08228
1.03583	1.12684	1.05468	1.0334	1.14625	1.43083	1.09241	1.03658	1.04388	1.03338		1.05216	1.11505	1.27956	1.19324	1.15009	1.14671	1.23841	1.6867	1.04255	1.24139		1.3762	1.21096	1.11146	1.1731	1.05889	1.03364	1.03477	1.13729	1.18045	1.06524		1.24091	1.12105	1.19626	1.15288	1.08363	1.06159	1.17324	1.04521	1.14812	1.09104		1.04683	1.05509	1.16966	1.08205	1.03411	1.07352
1.04776	1.12833	1.05083	1.00096	1.07159	1.4265	1.08413	1.03364	1.04388	1.02902		1.04779	1.10128	1.27837	1.19152	1.16259	1.14236	1.27048	1.69006	1.03739	1.24201		1.16301	1.17882	1.12533	1.18527	1.08199	1.02454	1.04327	1.12414	1.16098	1.0817		1.23862	1.10692	1.19119	1.151	1.08675	1.05825	1.17477	1.04996	1.14526	1.07448		1.09566	1.05806	1.19926	1.05375	1.04238	1.07352
1.04837	1.13935	1.05384	1.01918	1.02714	1.42072	1.05614	1.03496	1.05513	1.03068		1.04371	1.09371	1.27183	1.19127	1.14867	1.13833	1.24364	1.72948	1.03924	1.23869		1.21627	1.16146	1.1286	1.2109	1.07543	1.06595	1.02021	1.12961	1.14485	1.07703		1.23742	1.11736	1.19911	1.16571	1.06136	1.06636	1.18363	1.05215	1.15468	1.07119		1.07833	1.05517	1.17368	1.05382	1.03611	1.06688
1.04588	1.14234	1.05887	1.01755	1.10129	1.39173	1.03444	1.04584	1.02435	1.0324		1.04184	1.11725	1.27454	1.19229	1.17273	1.13098	1.24532	1.71654	1.0401	1.23979		1.40663	1.14911	1.1302	1.21251	1.06142	1.05567	1.03069	1.12787	1.14044	1.07522		1.23811	1.13787	1.19455	1.1559	1.07994	1.05665	1.19454	1.05444	1.11498	1.09517		1.12503	1.06919	1.18055	1.04595	1.04605	1.06688
1.03512	1.10402	1.06764	1.01832	1.23742	1.39374	1.03908	1.02832	1.03296	1.03477		1.04544	1.09776	1.28157	1.19289	1.15992	1.13069	1.25113	1.72084	1.03891	1.23827		1.26282	1.1345	1.11796	1.22355	1.08644	1.06455	1.01669	1.13939	1.1426	1.08771		1.23464	1.12635	1.19828	1.15552	1.06998	1.05506	1.21293	1.04461	1.1738	1.10302		1.09238	1.04836	1.18512	1.07504	1.04488	1.07003
1.03792	1.09198	1.09506	1.01228	1.24826	1.42193	1.01932	1.03223	1.05927	1.03717		1.04821	1.10614	1.28258	1.19326	1.14981	1.12177	1.25414	1.70818	1.03853	1.23558		1.2871	1.11396	1.10148	1.23314	1.07555	1.11851	1.03266	1.11691	1.13354	1.08168		1.23081	1.12501	1.20055	1.15959	1.0782	1.05754	1.18068	1.04361	1.13699	1.07304		1.08235	1.0606	1.17866	1.0752	1.04337	1.06449
1.0363	1.12633	1.0862	1.02267	1.27954	1.32729	1.0163	1.04286	1.05586	1.03236		1.05329	1.10189	1.27948	1.1929	1.14934	1.1219	1.29268	1.69375	1.03809	1.23615		1.38925	1.10167	1.1064	1.23869	1.05629	1.07083	1.03947	1.1309	1.13016	1.05918		1.22964	1.11037	1.19525	1.14836	1.08608	1.06036	1.17953	1.0636	1.09075	1.10315		1.07586	1.06403	1.19153	1.08408	1.05207	1.06496
1.03715	1.08975	1.07434	1.02116	1.17693	1.42901	1.03201	1.04403	1.0306	1.02819		1.05625	1.10421	1.28138	1.19517	1.15511	1.11982	1.27241	1.73293	1.03829	1.23805		1.42153	1.09759	1.07617	1.22554	1.0488	1.09371	1.03767	1.13077	1.12447	1.08526		1.23178	1.10601	1.19874	1.15877	1.07574	1.05996	1.2025	1.0501	1.14558	1.09101		1.0756	1.06354	1.18063	1.072	1.04102	1.06799
1.03048	1.09244	1.07486	1.02025	1.13002	1.50277	1.06629	1.04017	1.04709	1.03066		1.05997	1.10983	1.27508	1.19555	1.16525	1.12357	1.26125	1.74085	1.03812	1.23803		1.38111	1.10388	1.06137	1.25364	1.09201	1.14583	1.04014	1.15398	1.11868	1.06085		1.23624	1.11102	1.19998	1.14928	1.09217	1.0546	1.20015	1.05068	1.11691	1.05669		1.09253	1.06075	1.17835	1.0809	1.04195	1.06303
1.03093	1.12258	1.08464	1.01655	1.04636	1.46238	1.07366	1.0328	1.04148	1.0309		1.0572	1.10659	1.27469	1.19569	1.15091	1.11922	1.26923	1.7155	1.04028	1.23381		1.39535	1.10258	1.0736	1.25309	1.09184	1.12123	1.04166	1.14933	1.11147	1.06131		1.24124	1.10147	1.19854	1.15725	1.08383	1.05393	1.20081	1.052	1.10649	1.11779		1.10428	1.05503	1.19031	1.04984	1.05394	1.06238
1.01881	1.07207	1.07788	1.0151	1.13359	1.40514	1.07874	1.04481	1.03357	1.03059		1.05943	1.10743	1.26518	1.19669	1.14942	1.10919	1.26474	1.72818	1.03877	1.23721		1.19534	1.08866	1.1033	1.26288	1.08083	1.05189	1.05012	1.14071	1.10911	1.08083		1.24362	1.0956	1.20303	1.15816	1.09574	1.04887	1.19258	1.04768	1.13824	1.08993		1.10347	1.06793	1.18906	1.06709	1.036	1.05761
1.02714	1.08925	1.08853	1.02957	1.11241	1.38391	1.08244	1.05143	1.03182	1.0353		1.05877	1.10767	1.26291	1.19523	1.15998	1.10379	1.28295	1.70207	1.04092	1.23787		1.29882	1.08402	1.07608	1.26776	1.07852	1.12941	1.04728	1.11512	1.10251	1.05413		1.24115	1.12098	1.20159	1.15759	1.08284	1.05236	1.18323	1.0629	1.15969	1.10604		1.06282	1.04914	1.19468	1.09448	1.06162	1.06604
1.03857	1.07257	1.09047	1.0427	1.18953	1.42219	1.07776	1.04194	1.04787	1.04243		1.05601	1.10471	1.25808	1.19646	1.13234	1.11065	1.22982	1.72405	1.03942	1.23452		1.42084	1.0796	1.08428	1.28903	1.07591	1.20805	1.04012	1.12265	1.10227	1.05244		1.24564	1.13059	1.20026	1.15754	1.0742	1.05463	1.20202	1.04678	1.11593	1.10199		1.10446	1.05768	1.20616	1.067	1.03688	1.06397
1.0269	1.07473	1.06888	1.03202	1.12942	1.44148	1.02995	1.04203	1.05747	1.03151		1.05909	1.10619	1.26057	1.19779	1.14922	1.1059	1.23073	1.70795	1.04208	1.23553		1.31313	1.06412	1.09718	1.29845	1.0541	1.11261	1.04619	1.14424	1.10282	1.06502		1.2519	1.12012	1.20803	1.15712	1.07305	1.05325	1.17863	1.05359	1.12168	1.10387		1.14363	1.06774	1.20632	1.04534	1.03045	1.06263
1.0367	1.06202	1.07162	1.03933	1.06875	1.44375	1.05446	1.04743	1.03821	1.02865		1.06418	1.10405	1.26078	1.19734	1.15347	1.10922	1.258	1.73067	1.04046	1.24059		1.42988	1.06561	1.07408	1.33349	1.02912	1.09486	1.03609	1.17786	1.10097	1.03309		1.24162	1.12146	1.20083	1.1471	1.0821	1.05152	1.18929	1.07547	1.10417	1.10181		1.1303	1.06322	1.18382	1.03306	1.04379	1.05981
1.02705	1.06804	1.08392	1.02283	1.1041	1.43008	1.01285	1.03027	1.0514	1.04058		1.05874	1.10628	1.26164	1.19606	1.16634	1.10529	1.23563	1.71038	1.0414	1.23507		1.40887	1.07573	1.04275	1.39072	1.07064	1.09895	1.04299	1.17776	1.09753	1.04156		1.2369	1.11426	1.20638	1.13646	1.08188	1.05513	1.2098	1.07248	1.13388	1.10443		1.07902	1.04616	1.20464	1.05972	1.05377	1.06383
1.03314	1.08274	1.06317	1.02054	1.10625	1.42881	1.02234	1.04015	1.05363	1.03992		1.05596	1.11453	1.26218	1.19669	1.16055	1.1038	1.28516	1.71924	1.04219	1.23335		1.41935	1.06995	1.05452	1.41663	1.05337	1.09973	1.02283	1.20191	1.09338	1.05771		1.23593	1.12055	1.20606	1.14565	1.08336	1.05744	1.197	1.06268	1.11331	1.08307		1.08596	1.05676	1.1862	1.04709	1.04196	1.05768
1.03062	1.04546	1.08947	1.02935	1.07211	1.4411	1.029	1.0395	1.04943	1.03729		1.05983	1.10313	1.25766	1.19539	1.16197	1.10324	1.28068	1.72934	1.04025	1.23422		1.22754	1.07833	1.06921	1.41813	1.05716	1.1455	1.03751	1.16801	1.0926	1.03869		1.22762	1.11976	1.2042	1.14448	1.08807	1.05232	1.17148	1.05076	1.10688	1.11824		1.07047	1.0595	1.20394	1.05564	1.0473	1.05728
1.03064	1.06016	1.07911	1.0457	1.13839	1.39743	1.00578	1.02065	1.04062	1.03888		1.05768	1.09943	1.26022	1.19377	1.14332	1.10355	1.28027	1.7356	1.04145	1.23568		1.04324	1.0837	1.07138	1.39976	1.07038	1.07751	1.02674	1.13836	1.09466	1.02961		1.22828	1.10657	1.20336	1.13466	1.08067	1.05865	1.19501	1.05711	1.10773	1.09173		1.11622	1.05866	1.19775	1.06869	1.0464	1.05836
1.04263	1.06404	1.07283	1.04145	1.14227	1.38918	1.02275	1.03364	1.03762	1.04365		1.05685	1.11593	1.2581	1.19437	1.16052	1.10338	1.25855	1.74424	1.03889	1.23418		1.25249	1.10453	1.08178	1.43759	1.05006	1.11818	1.02657	1.147	1.09995	1.02857		1.23282	1.10328	1.20394	1.14674	1.08849	1.06308	1.21756	1.06356	1.0892	1.09505		1.08673	1.061	1.20112	1.08032	1.04812	1.06324
1.05093	1.05991	1.06719	1.02428	1.13583	1.40622	1.04621	1.04076	1.03702	1.04		1.05516	1.1088	1.25622	1.19414	1.15531	1.11169	1.25957	1.71391	1.04185	1.23517		1.12635	1.08253	1.09878	1.45098	1.03182	1.0942	1.04186	1.15869	1.10316	1.03842		1.22463	1.09672	1.20197	1.15288	1.09063	1.06491	1.21166	1.04672	1.10321	1.10443		1.09207	1.0521	1.21406	1.05398	1.04896	1.06044
1.05007	1.05145	1.0657	1.02348	1.0652	1.35879	1.12872	1.04751	1.05627	1.03303		1.06307	1.11449	1.26057	1.19341	1.16809	1.11552	1.27771	1.73299	1.03766	1.23407		1.19042	1.08126	1.0853	1.44042	1.05962	1.12018	1.02236	1.1353	1.10304	1.04436		1.22664	1.09302	1.20464	1.15854	1.08572	1.06209	1.18831	1.05668	1.10512	1.09971		1.12582	1.05301	1.1918	1.04193	1.05607	1.06393
1.04363	1.05693	1.07321	1.02741	1.19642	1.38042	1.10363	1.03879	1.04433	1.03189		1.06132	1.10737	1.26141	1.19245	1.13209	1.11662	1.29609	1.73706	1.03953	1.23259		1.26189	1.07557	1.09328	1.4039	1.05789	1.07909	1.0225	1.17748	1.09579	1.05385		1.22605	1.09781	1.20546	1.16623	1.11313	1.05378	1.2116	1.05761	1.10982	1.09573		1.0742	1.05699	1.20864	1.07516	1.02834	1.05893
1.0388	1.05011	1.06465	1.04115	1.27946	1.3584	1.07309	1.04269	1.05849	1.03629		1.05679	1.11597	1.27111	1.19289	1.14688	1.12773	1.27427	1.74523	1.03831	1.23364		1.32304	1.07176	1.0924	1.36511	1.07503	1.10003	1.02253	1.15778	1.09929	1.06149		1.22149	1.10113	1.20777	1.16709	1.09356	1.05635	1.19301	1.06019	1.06846	1.09459		1.06989	1.05287	1.21967	1.05935	1.03162	1.06082
1.03282	1.04661	1.06648	1.05912	1.19135	1.39192	1.05622	1.03025	1.03519	1.02924		1.05624	1.11847	1.27177	1.19364	1.13776	1.13142	1.27452	1.73831	1.04019	1.23073		1.41285	1.0941	1.11715	1.32083	1.08928	1.19042	1.0342	1.12281	1.09767	1.06747		1.22193	1.09659	1.20586	1.16236	1.09649	1.05675	1.18319	1.0594	1.09007	1.10354		1.10789	1.05624	1.20048	1.02939	1.03892	1.05807
1.03672	1.04728	1.06615	1.04655	1.23991	1.35158	1.06145	1.03213	1.05389	1.04059		1.05808	1.11593	1.2694	1.1927	1.14417	1.13349	1.30121	1.73315	1.04121	1.22875		1.44894	1.13589	1.10959	1.29161	1.04047	1.13348	1.04161	1.14279	1.09217	1.06905		1.2259	1.11739	1.1976	1.16094	1.09921	1.05568	1.20239	1.04909	1.08859	1.13313		1.0502	1.06266	1.22343	1.0422	1.04822	1.06128
1.03668	1.08526	1.05333	1.04142	1.14164	1.3706	1.06742	1.01978	1.05863	1.03187		1.05184	1.11893	1.26986	1.19309	1.15192	1.13768	1.30505	1.72793	1.03997	1.23253		1.30804	1.16505	1.09244	1.2786	1.0839	1.03056	1.0244	1.14231	1.09647	1.05516		1.23229	1.12847	1.20417	1.1657	1.10934	1.04937	1.16986	1.04093	1.08324	1.10566		1.07816	1.05344	1.2173	1.01853	1.04303	1.05955
1.04713	1.0373	1.06178	1.05831	1.09263	1.36255	1.06109	1.03146	1.05972	1.04048		1.0508	1.10579	1.26499	1.19256	1.14661	1.14417	1.25789	1.73807	1.04225	1.23377		1.33605	1.14263	1.10044	1.28278	1.07019	1.11657	1.04101	1.13153	1.12803	1.06424		1.2269	1.11882	1.2052	1.16897	1.11523	1.05668	1.18359	1.04098	1.07883	1.14191		1.07327	1.05677	1.2064	1.11549	1.02997	1.05933
1.04907	1.07048	1.06266	1.05739	1.08166	1.37256	1.00436	1.0164	1.05397	1.03221		1.0549	1.12276	1.26146	1.19163	1.15283	1.15061	1.25483	1.75176	1.04103	1.23315		1.19836	1.11944	1.08669	1.27556	1.04583	1.02897	1.037	1.13133	1.15356	1.08688		1.22987	1.1081	1.20343	1.17374	1.11951	1.04993	1.19216	1.0492	1.08912	1.12022		1.07916	1.05993	1.21052	1.06748	1.04215	1.06465
1.05401	1.12939	1.05742	1.05999	1.17978	1.36907	1.04537	1.03148	1.03194	1.03399		1.05859	1.12483	1.25797	1.19209	1.16824	1.15713	1.32169	1.67996	1.042	1.23186		1.18169	1.13162	1.11025	1.26379	1.0884	1.02929	1.04369	1.12084	1.17448	1.06346		1.23356	1.104	1.20693	1.165	1.14399	1.04842	1.19747	1.05554	1.06972	1.11291		1.08335	1.05776	1.2164	1.06314	1.04412	1.06135
1.06288	1.12422	1.03171	1.04935	1.12026	1.40606	1.01017	1.03079	1.02823	1.03483		1.05845	1.11922	1.26027	1.19192	1.14856	1.16762	1.30256	1.69885	1.04251	1.23119		1.04966	1.13572	1.08895	1.27672	1.08102	1.16071	1.02361	1.15637	1.18596	1.04632		1.24202	1.09825	1.20568	1.17393	1.15922	1.05103	1.17873	1.04729	1.08923	1.11156		1.12153	1.05819	1.21948	1.08189	1.0538	1.06215
1.05077	1.14037	1.04968	1.05217	1.12374	1.36649	1.07084	1.02833	1.06368	1.03251		1.05857	1.12658	1.26345	1.19214	1.15969	1.17718	1.32247	1.71119	1.04062	1.23082		1.09076	1.21418	1.05855	1.2847	1.12709	1.12816	1.02589	1.17189	1.18767	1.07534		1.24367	1.09749	1.20819	1.16593	1.16775	1.04875	1.19912	1.04597	1.06897	1.12103		1.07006	1.06053	1.21274	1.03505	1.04801	1.05993
1.06595	1.13649	1.03753	1.05113	1.22269	1.32779	1.11545	1.0278	1.06458	1.03176		1.05878	1.12679	1.27338	1.19355	1.15426	1.17992	1.32493	1.725	1.04279	1.23117		1.15646	1.27271	1.07086	1.2897	1.11796	1.10369	1.03675	1.18478	1.17481	1.0491		1.24786	1.09987	1.20656	1.16811	1.15072	1.05526	1.18108	1.0555	1.07497	1.14437		1.11441	1.05085	1.23016	1.07271	1.05729	1.0569
1.06044	1.11342	1.02956	1.06672	1.15519	1.3011	1.07586	1.0368	1.04172	1.03944		1.06269	1.11306	1.27083	1.19485	1.16419	1.18065	1.3288	1.73818	1.04135	1.2312		1.2359	1.24681	1.06298	1.2522	1.1	1.06288	1.03616	1.21586	1.1693	1.06869		1.24387	1.08577	1.21369	1.17459	1.16497	1.06222	1.21365	1.06457	1.03831	1.1449		1.03599	1.05611	1.21084	1.03829	1.05065	1.06035
1.04723	1.11756	1.03454	1.05467	1.11307	1.33959	1.07251	1.02476	1.0398	1.03148		1.05957	1.12522	1.26531	1.19422	1.16527	1.18891	1.33353	1.73737	1.04282	1.23159		1.14991	1.24215	1.05846	1.2333	1.08691	1.08353	1.04178	1.19455	1.17668	1.05151		1.24253	1.07995	1.21116	1.1682	1.16348	1.06579	1.16307	1.05026	1.05119	1.11894		1.06572	1.04764	1.2188	1.04597	1.04849	1.05972
1.04383	1.12799	1.02797	1.04575	1.14777	1.32735	1.0471	1.02536	1.05933	1.03495		1.05825	1.12631	1.25998	1.19451	1.1499	1.19385	1.3078	1.7288	1.04046	1.23285		1.38554	1.21227	1.06461	1.22119	1.09175	1.12518	1.02584	1.15929	1.18141	1.07882		1.24446	1.07797	1.20216	1.16957	1.13897	1.06685	1.16194	1.03568	1.08573	1.12881		1.03914	1.04874	1.2123	1.0671	1.02775	1.06034
1.03866	1.11979	1.02946	1.03607	1.13741	1.33966	1	1.02531	1.06048	1.0247		1.05768	1.13302	1.26335	1.19504	1.18432	1.19623	1.34936	1.73606	1.04045	1.23412		1.37187	1.16406	1.06036	1.22915	1.08561	1.12322	1.03653	1.17511	1.17161	1.02756		1.23491	1.08724	1.21031	1.17042	1.14475	1.0664	1.21781	1.03669	1.08695	1.11861		1.11542	1.063	1.21711	1.05559	1.03855	1.062
1.05904	1.11315	1.04179	1.05095	1.03504	1.30537	1.04276	1.02626	1.0365	1.02451		1.05907	1.12146	1.25701	1.19442	1.16977	1.19911	1.34252	1.73046	1.04358	1.23186		1.38099	1.16088	1.01728	1.24126	1.06531	1.10502	1.03469	1.17001	1.15586	1.04474		1.23161	1.09105	1.20896	1.17111	1.15866	1.06811	1.22274	1.043	1.09281	1.10807		1.07773	1.0583	1.23249	1.07704	1.06064	1.06222
1.05586	1.12203	1.03091	1.05636	1.10364	1.34041	1.0313	1.02545	1.03971	1.03073		1.05544	1.1307	1.26027	1.19243	1.16209	1.20623	1.31113	1.73354	1.04074	1.23288		1.39183	1.1519	1.03729	1.23208	1.04043	1.12389	1.04522	1.13803	1.15301	1.03188		1.22499	1.11389	1.21368	1.17656	1.16088	1.06747	1.22909	1.05146	1.07856	1.12151		1.08193	1.05876	1.21903	1.06305	1.03679	1.06352
1.04652	1.10081	1.01918	1.04902	1.03866	1.34196	1.06105	1.02007	1.05813	1.02805		1.06153	1.12429	1.26026	1.19384	1.16453	1.2097	1.34299	1.70952	1.04418	1.23197		1.09357	1.13286	1.03885	1.21353	1.06544	1.14795	1.03834	1.12934	1.14485	1.04342		1.22495	1.12657	1.21346	1.17338	1.13911	1.06447	1.19988	1.06195	1.04796	1.10706		1.11387	1.04629	1.22257	1.06221	1.05303	1.06363
1.05143	1.11441	1.00929	1.04473	1.07317	1.33412	1.08461	1.0303	1.06686	1.03739		1.06517	1.12459	1.25606	1.1956	1.1544	1.21102	1.29509	1.72503	1.04269	1.23253		1.19111	1.13715	1.04773	1.18817	1.06214	1.07375	1.03844	1.13884	1.12605	1.03226		1.23517	1.13068	1.20637	1.16729	1.13548	1.06501	1.21234	1.07703	1.04356	1.10795		1.10552	1.0561	1.22812	1.06022	1.04724	1.06118
1.05583	1.10018	1.01983	1.06755	1.1516	1.39068	1.08265	1.02873	1.0512	1.03515		1.06274	1.13166	1.25142	1.19543	1.16718	1.21171	1.32323	1.74001	1.04363	1.23128		1.20607	1.14982	1.04619	1.17639	1.06831	1.11382	1.03882	1.13283	1.12335	1.01883		1.23614	1.11024	1.20871	1.16382	1.1401	1.05666	1.21369	1.06548	1.05505	1.10221		1.11038	1.05619	1.21239	1.06195	1.04298	1.05123
1.04489	1.09019	1.02176	1.0675	1.20518	1.31923	1.06345	1.0209	1.05198	1.03345		1.06247	1.12794	1.24789	1.19746	1.17423	1.2177	1.35	1.71915	1.04364	1.23037		1.17763	1.11289	1.03596	1.16726	1.10228	1.15721	1.03981	1.15473	1.11724	1.02596		1.23012	1.11403	1.20911	1.16563	1.14441	1.0595	1.18422	1.06344	1.06241	1.10293		1.11225	1.04613	1.22432	1.05169	1.04159	1.05759
1.04328	1.10201	1.03148	1.06234	1.11497	1.38297	1.04591	1.01831	1.05095	1.03882		1.05707	1.14436	1.24132	1.19846	1.15103	1.21228	1.34104	1.71159	1.03985	1.23033		1.39482	1.09811	1.04407	1.15957	1.0611	1.12203	1.04103	1.14023	1.10848	1.03977		1.22879	1.11728	1.20982	1.16164	1.14857	1.06131	1.19937	1.04892	1.05524	1.11926		1.11818	1.04923	1.23118	1.06101	1.03314	1.05672
1.04963	1.12524	1.01607	1.03395	1.10717	1.40863	1.04622	1.01799	1.0516	1.03901		1.05905	1.14819	1.23585	1.19505	1.16185	1.21129	1.32431	1.73996	1.04165	1.233		1.23534	1.09303	1.05524	1.14872	1.04801	1.15617	1.04272	1.121	1.10354	1.0278		1.23097	1.10678	1.20963	1.16755	1.13592	1.06287	1.16458	1.05281	1.05055	1.11057		1.10054	1.04776	1.23832	1.03302	1.05895	1.05288
1.05145	1.10245	1.03292	1.02579	1.04071	1.42766	1.02752	1.03053	1.06304	1.04175		1.05611	1.1314	1.23414	1.19489	1.14744	1.2083	1.34149	1.70444	1.04194	1.23131		1.32272	1.07789	1.06936	1.14237	1.0568	1.14758	1.04501	1.14493	1.10324	1.03256		1.22032	1.09929	1.20932	1.17337	1.12813	1.06435	1.17055	1.0506	1.05224	1.10258		1.13829	1.04373	1.21627	1.07404	1.04345	1.05227
1.04069	1.0759	1.02329	1.0542	1.09681	1.35362	1.04705	1.02427	1.04939	1.03255		1.05844	1.13941	1.22824	1.19491	1.17063	1.20413	1.33344	1.71068	1.04012	1.23202		1.28359	1.07008	1.06446	1.14733	1.07603	1.17035	1.04617	1.15159	1.09243	1.00919		1.22298	1.10188	1.21038	1.1737	1.09924	1.06816	1.16077	1.05089	1.0652	1.09177		1.12285	1.05465	1.23714	1.07826	1.036	1.0448
1.03832	1.08276	1.02263	1.07401	1.17949	1.36477	1.13871	1.02913	1.05866	1.03139		1.05868	1.12409	1.22967	1.19223	1.15622	1.208	1.36379	1.72405	1.04277	1.22922		1.36455	1.06598	1.07276	1.15505	1.0493	1.11554	1.03654	1.1467	1.09003	1.03393		1.2201	1.10437	1.21585	1.17365	1.09326	1.05622	1.17278	1.04643	1.10216	1.10394		1.08046	1.05875	1.22588	1.07648	1.03423	1.04878
1.04474	1.06849	1.01496	1.07979	1.13262	1.3877	1.11319	1.02316	1.05567	1.03994		1.05365	1.13739	1.23039	1.19532	1.17006	1.20508	1.3602	1.75032	1.0442	1.22904		1.33013	1.06199	1.07644	1.15228	1.05364	1.10209	1.02385	1.17959	1.08337	1.05039		1.23444	1.0989	1.20512	1.17311	1.08367	1.05576	1.16591	1.05315	1.05152	1.0888		1.07274	1.05838	1.23678	1.08777	1.03397	1.05196
1.05664	1.08072	1.0226	1.06535	1.1707	1.31242	1.10129	1.02408	1.03997	1.03776		1.05573	1.13726	1.22797	1.19062	1.1737	1.20211	1.33056	1.71526	1.04409	1.22898		1.48553	1.04797	1.0604	1.13982	1.05757	1.16744	1.03477	1.16	1.08552	1.05632		1.23503	1.08433	1.21378	1.18133	1.09037	1.05852	1.15043	1.03581	1.13853	1.11277		1.11828	1.05485	1.2238	1.0563	1.03698	1.04809
1.0403	1.05271	1.01669	1.06377	1.15592	1.38308	1.08916	1.02679	1.02839	1.03417		1.06502	1.13761	1.2219	1.19123	1.15913	1.19906	1.3683	1.74992	1.04056	1.22992		1.4108	1.05285	1.06098	1.11457	1.08613	1.15136	1.02483	1.16058	1.08678	1.05603		1.23166	1.08939	1.21143	1.17674	1.10207	1.06113	1.19411	1.05636	1.07491	1.09105		1.03145	1.05671	1.2529	1.066	1.03897	1.0427
1.04451	1.08514	1.02583	1.08065	1.00682	1.34809	1.05549	1.02288	1.0631	1.04124		1.0593	1.14076	1.21795	1.19286	1.14813	1.19324	1.35742	1.73056	1.0393	1.22917		1.42168	1.04976	1.08194	1.08729	1.06933	1.17888	1.0422	1.15137	1.07877	1.04918		1.23434	1.08789	1.20903	1.18319	1.11462	1.05245	1.15519	1.05108	1.1112	1.10664		1.08602	1.05781	1.25604	1.07669	1.04083	1.04926
1.04266	1.06207	1.01404	1.13266	1.00521	1.36896	1.06624	1.02116	1.0574	1.03866		1.0597	1.13152	1.21462	1.19234	1.14498	1.19729	1.33671	1.75025	1.04529	1.23164		1.095	1.04319	1.09911	1.08533	1.08274	1.23186	1.03502	1.18491	1.07489	1.05774		1.23356	1.08655	1.21368	1.17459	1.11172	1.05593	1.15154	1.05552	1.07151	1.0976		1.12953	1.04976	1.24567	1.06119	1.04953	1.04698
1.05766	1.0705	1.0127	1.09788	1.05703	1.35101	1.10632	1.02277	1.04659	1.04156		1.0618	1.13717	1.21564	1.19189	1.16315	1.19212	1.33629	1.74044	1.04264	1.22911		1.24835	1.04462	1.09078	1.09889	1.04405	1.14448	1.04155	1.18598	1.07036	1.09688		1.24358	1.08834	1.21856	1.16889	1.10952	1.05026	1.17008	1.04723	1.08777	1.07921		1.03626	1.0457	1.24128	1.08487	1.03596	1.05232
1.05232	1.09593	1.00861	1.11466	1.23689	1.35235	1.18921	1.03844	1.05638	1.03524		1.06265	1.1401	1.21553	1.19567	1.1622	1.18958	1.30789	1.74354	1.0389	1.23001		1.41843	1.03787	1.06993	1.09469	1.06818	1.16641	1.04293	1.14155	1.06757	1.09266		1.24295	1.09414	1.21538	1.18825	1.10109	1.05129	1.17747	1.03733	1.04229	1.10815		1.07986	1.05116	1.23226	1.04462	1.05028	1.04234
1.06498	1.08133	1.0222	1.11436	1.19327	1.34946	1.14376	1.03399	1.05795	1.04063		1.05947	1.13857	1.21309	1.19613	1.15627	1.19056	1.34256	1.74255	1.04072	1.22898		1.36399	1.04132	1.07562	1.11816	1.11587	1.10182	1.03898	1.14013	1.0626	1.06174		1.23253	1.08608	1.21643	1.17358	1.10571	1.05385	1.17762	1.05316	1.04235	1.08234		1.10233	1.04997	1.23205	1.05796	1.03055	1.0413
1.05626	1.07663	1.02302	1.16329	1.24842	1.38248	1.12529	1.03235	1.0546	1.04066		1.06588	1.14927	1.21202	1.19399	1.16925	1.18133	1.35526	1.73721	1.0411	1.22781		1.42283	1.04594	1.08278	1.15084	1.06551	1.22809	1.02198	1.14348	1.05646	1.0705		1.23024	1.0969	1.21546	1.1762	1.09958	1.05634	1.15621	1.05699	1.06236	1.08716		1.10982	1.05625	1.2467	1.08004	1.03241	1.04641
1.04468	1.06241	1.0194	1.18778	1.25216	1.31024	1.1128	1.02218	1.05821	1.03994		1.06838	1.14695	1.21036	1.19495	1.17425	1.18137	1.30693	1.74342	1.0444	1.22782		1.35054	1.04819	1.10558	1.17074	1.10288	1.23093	1.04482	1.14845	1.052	1.06489		1.23283	1.11339	1.21255	1.175	1.10369	1.06	1.17354	1.05698	1.03429	1.11683		1.11534	1.04919	1.23398	1.04422	1.02776	1.03874
1.04088	1.09068	1.01052	1.1888	1.26136	1.38747	1.09643	1.03949	1.06712	1.04028		1.06531	1.14582	1.21372	1.19497	1.16667	1.17831	1.34812	1.73705	1.03627	1.22822		1.3653	1.04138	1.1042	1.22484	1.12155	1.23599	1.03048	1.1506	1.04698	1.0546		1.22837	1.09282	1.21745	1.17737	1.10075	1.05567	1.18003	1.0348	1.01141	1.0915		1.10757	1.05119	1.23741	1.04129	1.04021	1.03675
1.03406	1.08407	1.00703	1.20661	1.13363	1.38734	1.08814	1.06038	1.04416	1.03631		1.0702	1.14309	1.21442	1.19306	1.17637	1.18208	1.33349	1.71762	1.03742	1.22715		1.35492	1.04641	1.07952	1.23266	1.10112	1.23601	1.04136	1.1466	1.03507	1.06805		1.22656	1.09412	1.20978	1.17546	1.10302	1.05583	1.184	1.05703	1.03404	1.10536		1.10283	1.05236	1.25268	1.0801	1.05908	1.03888
1.04187	1.0509	1.02022	1.19526	1.10945	1.39079	1.07072	1.05414	1.0626	1.04341		1.0734	1.15653	1.21526	1.19413	1.161	1.1791	1.32252	1.73659	1.04203	1.22898		1.41142	1.04802	1.06186	1.2299	1.11056	1.19805	1.04618	1.13885	1.03672	1.06316		1.23028	1.09534	1.21635	1.17611	1.09156	1.05156	1.18505	1.05412	1.04968	1.10512		1.13727	1.04501	1.25795	1.07116	1.05055	1.03801
1.03926	1.07324	1.02005	1.20367	1.17413	1.3574	1.05181	1.05434	1.05666	1.04109		1.07026	1.14446	1.20393	1.19427	1.17911	1.17525	1.31794	1.71668	1.03988	1.22759		1.28009	1.03928	1.08763	1.24792	1.09088	1.13592	1.03319	1.16805	1.0419	1.05587		1.2311	1.11318	1.21353	1.16337	1.08394	1.04867	1.20295	1.04837	1.08629	1.12328		1.11567	1.05631	1.25012	1.05338	1.04618	1.03676
1.0415	1.08652	1.01969	1.23848	1.24995	1.43555	1.1629	1.05551	1.04794	1.03291		1.06445	1.1484	1.20436	1.19171	1.17424	1.17379	1.30913	1.72041	1.04271	1.22605		1.41679	1.04179	1.10145	1.25151	1.11153	1.25664	1.03013	1.16639	1.03878	1.07111		1.23558	1.12319	1.21728	1.17517	1.09914	1.05448	1.18855	1.06791	1.0584	1.06376		1.03639	1.0542	1.25297	1.03629	1.03367	1.03591
1.04414	1.12282	1.02534	1.22462	1.19555	1.40696	1.17732	1.04825	1.04809	1.04009		1.06323	1.15515	1.1979	1.19089	1.16457	1.16804	1.35454	1.74754	1.03894	1.22485		1.19833	1.04205	1.10115	1.24291	1.07785	1.16132	1.01129	1.21317	1.03338	1.07085		1.24243	1.12437	1.22396	1.16026	1.08317	1.0528	1.19954	1.06379	1.04427	1.10753		1.08946	1.06112	1.24715	1.06382	1.06183	1.03452
1.04323	1.13832	1.02623	1.22032	1.1038	1.42784	1.11176	1.05327	1.04197	1.04525		1.06578	1.15119	1.20428	1.1958	1.19059	1.16299	1.31322	1.71154	1.04111	1.22355		1.18777	1.04516	1.11729	1.23164	1.09706	1.28902	1.02334	1.17935	1.0365	1.07183		1.24158	1.11396	1.21715	1.15248	1.092	1.0614	1.18942	1.07287	1.04136	1.0973		1.07927	1.05286	1.25458	1.06905	1.04025	1.02904
1.0421	1.13484	1.035	1.2345	1.25161	1.38243	1.08774	1.03812	1.05461	1.04187		1.0681	1.15207	1.20487	1.19664	1.17545	1.16254	1.34693	1.72857	1.03986	1.2236		1.23399	1.04857	1.09722	1.23702	1.07295	1.19802	1.04225	1.19498	1.03325	1.07381		1.22957	1.10771	1.21333	1.1592	1.09251	1.05359	1.19289	1.06229	1.05586	1.10125		1.0682	1.0516	1.25811	1.07125	1.0429	1.03035
1.04455	1.1617	1.01815	1.24246	1.09178	1.34741	1.08434	1.04804	1.06183	1.05041		1.07	1.15895	1.20209	1.20141	1.16985	1.16349	1.33176	1.73396	1.03895	1.22163		1.29715	1.04564	1.07439	1.25329	1.06632	1.21508	1.0408	1.19276	1.03398	1.05119		1.23199	1.11395	1.21426	1.1686	1.10162	1.06083	1.1882	1.07244	1.02602	1.10451		1.05436	1.05492	1.26148	1.03977	1.03155	1.02985
1.03815	1.15145	1.0461	1.22943	1.08103	1.45914	1.08693	1.04135	1.05785	1.04288		1.06614	1.15333	1.20475	1.20407	1.17827	1.1607	1.35097	1.75558	1.04311	1.21904		1.26776	1.03957	1.06658	1.24845	1.08397	1.27347	1.03042	1.18184	1.03422	1.03536		1.2402	1.10778	1.21957	1.16416	1.09096	1.0655	1.17203	1.0636	1.05277	1.11988		1.08866	1.04146	1.26055	1.07577	1.04721	1.03834
1.04156	1.12418	1.02268	1.23182	1.11755	1.573	1.03662	1.03391	1.0514	1.03958		1.06326	1.15619	1.21354	1.20231	1.16316	1.1658	1.31839	1.74747	1.04114	1.2198		1.23581	1.03397	1.06333	1.24204	1.08257	1.1784	1.0382	1.16992	1.03396	1.05635		1.2471	1.10124	1.21824	1.16089	1.09419	1.06453	1.17871	1.05749	1.02577	1.0935		1.07548	1.03836	1.26885	1.07821	1.03871	1.03849
1.04399	1.13819	1.03162	1.23889	1.08198	1.5126	1.045	1.05703	1.03351	1.03677		1.06588	1.15263	1.21401	1.1994	1.17509	1.16249	1.34813	1.74505	1.04199	1.21995		1.41707	1.04588	1.03851	1.24482	1.09003	1.23513	1.04886	1.19405	1.03152	1.03125		1.24594	1.09027	1.22059	1.15967	1.09503	1.06746	1.18817	1.05251	1.04468	1.08528		1.09927	1.03403	1.2665	1.07876	1.02857	1.0368
1.05827	1.11354	1.02981	1.23664	1.10824	1.41452	1.14045	1.0442	1.05728	1.04616		1.06942	1.15139	1.23527	1.19541	1.15987	1.16517	1.34157	1.76343	1.04076	1.22086		1.29126	1.05547	1.02805	1.22932	1.07753	1.15413	1.03557	1.19185	1.02595	1.05457		1.24618	1.08936	1.21778	1.16239	1.08616	1.06706	1.1724	1.05746	1.0476	1.07508		1.13722	1.04141	1.26212	1.05349	1.04575	1.03732
1.05478	1.15	1.00824	1.23997	1.07185	1.40508	1.3407	1.04786	1.06364	1.03697		1.06699	1.15195	1.24298	1.19666	1.16651	1.16868	1.37075	1.74448	1.04306	1.21962		1.22374	1.0748	1.04178	1.24492	1.05696	1.12671	1.0366	1.16602	1.03343	1.05437		1.24033	1.08005	1.21899	1.15667	1.0678	1.06485	1.18289	1.0522	1.02857	1.11816		1.13366	1.04828	1.2711	1.08337	1.02584	1.0357
1.04792	1.13295	1.02448	1.23863	1.03182	1.39469	1.31193	1.03178	1.05706	1.04651		1.07216	1.14618	1.23866	1.19455	1.16252	1.1784	1.35431	1.74916	1.03904	1.21835		1.43468	1.0979	1.05005	1.24852	1.05313	1.12766	1.04073	1.20946	1.02815	1.04218		1.23964	1.06934	1.21965	1.16609	1.07516	1.06443	1.17268	1.0635	1.03692	1.09149		1.09281	1.04573	1.26349	1.07439	1.03824	1.03199
1.05486	1.13019	1.03967	1.22276	1.11425	1.37366	1.23874	1.03277	1.06884	1.04137		1.07394	1.16013	1.23861	1.19308	1.16535	1.1843	1.35708	1.74371	1.04356	1.22063		1.41421	1.16466	1.06308	1.24401	1.06724	1.19629	1.05031	1.18654	1.03881	1.05762		1.23057	1.06896	1.22543	1.1424	1.09943	1.05799	1.1812	1.06812	1.01621	1.10293		1.09533	1.04189	1.26816	1.04602	1.02653	1.03505
1.04762	1.10022	1.02397	1.23115	1.12174	1.37363	1.1766	1.04759	1.04569	1.04086		1.07594	1.14918	1.25391	1.19295	1.16873	1.18859	1.35043	1.73746	1.04206	1.21958		1.38442	1.21079	1.08332	1.24735	1.08915	1.18891	1.01065	1.17675	1.03553	1.02256		1.23728	1.0838	1.22217	1.1547	1.10251	1.05807	1.18566	1.05642	1.04569	1.11228		1.06973	1.04214	1.26447	1.08032	1.0339	1.03795
1.04605	1.10287	1.01294	1.19921	1.21799	1.35007	1.13709	1.03817	1.05625	1.04932		1.07942	1.14404	1.24786	1.19262	1.16353	1.20782	1.38187	1.73778	1.04083	1.21762		1.15443	1.26783	1.04223	1.26816	1.09362	1.23375	1.04714	1.17927	1.03349	1.04527		1.2355	1.08014	1.22366	1.15204	1.08731	1.05966	1.20067	1.05465	1.04306	1.11225		1.12929	1.04201	1.26798	1.07252	1.05395	1.03252
1.04486	1.1038	1.03407	1.22999	1.14831	1.33236	1.1215	1.03576	1.0408	1.04466		1.07433	1.14836	1.2503	1.19471	1.19096	1.21574	1.349	1.74066	1.04419	1.21775		1.23272	1.27095	1.05443	1.27181	1.04938	1.17596	1.04545	1.17285	1.03357	1.05541		1.23206	1.07496	1.22595	1.16202	1.09556	1.06166	1.19537	1.04664	1.0745	1.08188		1.1591	1.04052	1.26437	1.11974	1.03736	1.03449
1.05456	1.08074	1.0403	1.19247	1.25993	1.35925	1.09492	1.03172	1.05167	1.04576		1.07222	1.15512	1.24758	1.19556	1.18484	1.21936	1.37179	1.74176	1.04456	1.21576		1.26607	1.25837	1.06277	1.25565	1.0436	1.21193	1.04595	1.18697	1.02632	1.06793		1.2305	1.08982	1.2232	1.16183	1.10935	1.06665	1.17469	1.03975	1.07348	1.07896		1.07231	1.03683	1.26184	1.08089	1.04732	1.03396
1.05408	1.08194	1.01807	1.18757	1.11175	1.35323	1.06409	1.0362	1.06282	1.04554		1.06782	1.15374	1.24338	1.19546	1.17572	1.2223	1.38612	1.73265	1.04174	1.21756		1.41615	1.24502	1.06643	1.23523	1.07286	1.18528	1.01626	1.22297	1.02747	1.06316		1.22588	1.08653	1.22715	1.16737	1.09667	1.05746	1.18523	1.05794	1.05709	1.09902		1.10322	1.04176	1.28273	1.0541	1.0289	1.03575
1.04739	1.11589	1.01636	1.18742	1.08242	1.37949	1.07012	1.02953	1.03969	1.05211		1.07133	1.16509	1.2515	1.194	1.17387	1.22613	1.37762	1.75007	1.04213	1.21781		1.41882	1.25844	1.07061	1.2289	1.09195	1.12593	1.01337	1.21252	1.02771	1.05157		1.23001	1.08272	1.22699	1.17424	1.09746	1.06259	1.21164	1.04175	1.03865	1.12916		1.06257	1.04902	1.26018	1.05747	1.03848	1.03791
1.04361	1.09429	1.02576	1.17211	1.15201	1.39911	1.0679	1.03827	1.03168	1.04553		1.07258	1.16264	1.2407	1.19377	1.18719	1.23373	1.35561	1.72587	1.04341	1.21575		1.41376	1.25682	1.08489	1.2175	1.08552	1.14675	1.05017	1.13866	1.02034	1.08638		1.23175	1.07854	1.22913	1.15944	1.08234	1.06266	1.17379	1.04467	1.05258	1.09847		1.06714	1.04615	1.26942	1.12454	1.05155	1.04134
1.06668	1.12981	1.02443	1.16566	1.27078	1.41349	1.07462	1.04098	1.04602	1.03778		1.07161	1.15723	1.23887	1.19165	1.18025	1.24464	1.37914	1.73454	1.04349	1.21814		1.32221	1.23136	1.08476	1.20837	1.05419	1.22661	1.03409	1.16925	1.02178	1.08203		1.23237	1.07396	1.22599	1.15282	1.11549	1.05325	1.18335	1.052	1.05882	1.08909		1.09821	1.05007	1.28083	1.07576	1.04498	1.04326
1.0609	1.06153	1.02477	1.16575	1.26422	1.35953	1.19872	1.04282	1.04102	1.03887		1.07332	1.16449	1.23997	1.19285	1.1732	1.25914	1.3827	1.75225	1.04245	1.21626		1.31104	1.6451	1.09297	1.18812	1.07432	1.15039	1.04272	1.15017	1.02727	1.09156		1.23839	1.07367	1.23289	1.17099	1.10382	1.05795	1.20613	1.06488	1.05642	1.0623		1.08057	1.04372	1.26527	1.04952	1.04088	1.03484
1.06048	1.06696	1.01734	1.15612	1.13348	1.37356	1.20475	1.03399	1.06759	1.04811		1.07008	1.16127	1.23076	1.19302	1.16452	1.27839	1.38448	1.74289	1.04182	1.21551		1.12138	2.8263	1.08762	1.18081	1.10388	1.21704	1.04371	1.13291	1.02874	1.0677		1.2354	1.07232	1.23532	1.17273	1.09899	1.05477	1.17922	1.07351	1.04756	1.10004		1.07369	1.04368	1.26424	1.07276	1.03497	1.03856
1.05847	1.09334	1.01654	1.17656	1.08383	1.39481	1.19049	1.03478	1.03339	1.04153		1.07739	1.16364	1.22186	1.19421	1.15459	1.28991	1.37914	1.7341	1.04464	1.21511		1.17345	3.20202	1.09299	1.18646	1.08511	1.1478	1.04539	1.14662	1.02581	1.07605		1.23481	1.06329	1.2317	1.16373	1.086	1.05543	1.18239	1.07638	1.02819	1.08931		1.0898	1.04297	1.26078	1.07745	1.05646	1.0334
1.04644	1.08112	1.03404	1.14726	1.08715	1.36679	1.1583	1.03917	1.05261	1.03855		1.0749	1.1574	1.23023	1.19626	1.16758	1.28638	1.36722	1.7312	1.04115	1.21581		1.02581	3.47429	1.09926	1.18581	1.10953	1.17852	1.04861	1.14154	1.03546	1.07256		1.23326	1.06582	1.2295	1.16806	1.09813	1.05393	1.1904	1.08213	1.06566	1.07173		1.12205	1.04415	1.25799	1.07451	1.03484	1.02858
1.05047	1.05024	1.03293	1.16607	1.06917	1.42987	1.1132	1.04346	1.05905	1.0473		1.07323	1.15732	1.22214	1.19534	1.17924	1.3041	1.36021	1.73594	1.04352	1.21541		1.23315	4.65733	1.10511	1.16337	1.1251	1.16708	1.04626	1.16193	1.03682	1.07312		1.23444	1.08048	1.22862	1.14974	1.10529	1.05232	1.16103	1.0833	1.05453	1.08508		1.06792	1.04816	1.26101	1.07147	1.02218	1.03465
1.05648	1.08689	1.01863	1.1376	1.24535	1.40079	1.09335	1.04085	1.08064	1.02901		1.06921	1.14472	1.22452	1.19423	1.18054	1.32083	1.37547	1.76403	1.04134	1.21463		1.37113	4.70869	1.1013	1.17635	1.15891	1.18591	1.05174	1.13028	1.03821	1.07532		1.23629	1.10604	1.23499	1.16743	1.1056	1.05203	1.18985	1.0908	1.06858	1.07504		1.10008	1.04884	1.27526	1.07787	1.03738	1.03809
1.04682	1.05002	1.01602	1.15336	1.17521	1.41236	1.07857	1.03354	1.07857	1.04263		1.07503	1.16387	1.22617	1.19374	1.19292	1.32279	1.33971	1.75144	1.04154	1.20664		1.186	4.98712	1.08988	1.18912	1.11938	1.18571	1.05269	1.12442	1.03694	1.06808		1.24115	1.10669	1.23312	1.17924	1.11796	1.05722	1.14525	1.09688	1.06931	1.08509		1.07897	1.04755	1.28565	1.0602	1.05111	1.03094
1.04329	1.07195	1.03809	1.12447	1.09538	1.40449	1.06453	1.03965	1.0729	1.04361		1.07797	1.16239	1.21796	1.19323	1.17973	1.33217	1.38003	1.76706	1.04134	1.20775		1.10085	6.02857	1.10375	1.18359	1.12182	1.17766	1.03241	1.13313	1.0355	1.07385		1.24002	1.11005	1.22996	1.16893	1.11224	1.05384	1.19022	1.07998	1.02737	1.07147		1.14513	1.03343	1.2691	1.07804	1.03178	1.03461
1.035	1.07264	1.01564	1.14895	1.03903	1.38995	1.06773	1.04627	1.05914	1.04408		1.08062	1.15404	1.21124	1.19305	1.19232	1.34006	1.36885	1.72921	1.04092	1.21314		1.09255	5.92451	1.10512	1.18228	1.13038	1.15393	1.05278	1.13227	1.02844	1.05946		1.2364	1.0983	1.23514	1.17266	1.10084	1.05572	1.18661	1.08464	1.04635	1.05976		1.06826	1.04269	1.27404	1.11808	1.05217	1.03173
1.04502	1.06908	1	1.14049	1.0768	1.41121	1.06272	1.0392	1.06831	1.04627		1.08034	1.15161	1.21026	1.19295	1.17025	1.3426	1.35345	1.70875	1.04117	1.20337		1.16863	5.94084	1.10465	1.17453	1.13529	1.13685	1.04473	1.12844	1.0357	1.06896		1.23075	1.09767	1.2361	1.18294	1.0982	1.0504	1.16136	1.09218	1.03794	1.07236		1.13462	1.03702	1.29011	1.06248	1.05113	1.03276
1.05115	1.06587	1.01919	1.12285	1.04743	1.40201	1.0357	1.03247	1.0679	1.04294		1.08023	1.15293	1.2088	1.19458	1.15974	1.34433	1.3747	1.7407	1.04118	1.20706		1.11013	6.91303	1.0856	1.14366	1.09356	1.17442	1.04883	1.11372	1.03261	1.06476		1.23177	1.08233	1.22857	1.17138	1.1115	1.04544	1.12462	1.08283	1.05461	1.09575		1.05814	1.03705	1.27757	1.04271	1.02894	1.02683
1.04571	1.0638	1.03112	1.12583	1.05166	1.36474	1.21515	1.04395	1.04733	1.05449		1.08187	1.16086	1.20997	1.19407	1.1776	1.34984	1.34906	1.71965	1.03906	1.20911		1.2364	6.50927	1.13972	1.12172	1.05851	1.17121	1.04561	1.12253	1.02992	1.07012		1.23756	1.07499	1.23522	1.17395	1.10629	1.04537	1.15764	1.0818	1.01717	1.08239		1.11373	1.04968	1.28375	1.07	1.03811	1.03302
1.04463	1.07043	1.02494	1.15202	1.14354	1.34296	1.24324	1.04105	1.04983	1.04787		1.07742	1.16481	1.20558	1.19521	1.17628	1.36199	1.38036	1.72336	1.04114	1.20819		1.20248	7.29741	1.11023	1.1159	1.10526	1.13639	1.04547	1.12898	1.02879	1.06811		1.23544	1.0864	1.23208	1.16248	1.10039	1.04746	1.16887	1.09452	1.027	1.07425		1.0759	1.03429	1.27852	1.06681	1.03336	1.03221
1.04642	1.06095	1.02738	1.13166	1.23626	1.3368	1.25788	1.04008	1.06303	1.03655		1.08128	1.15785	1.20728	1.19601	1.17529	1.36551	1.36215	1.74297	1.04332	1.20386		1.25819	7.48014	1.08946	1.12177	1.10513	1.18343	1.04893	1.13247	1.02927	1.06605		1.23855	1.09557	1.23328	1.16577	1.09793	1.04811	1.15226	1.08245	1.02426	1.08388		1.08276	1.0437	1.28234	1.06365	1.01449	1.03412
1.03897	1.07738	1.01961	1.16577	1.23624	1.36288	1.19857	1.04485	1.06405	1.04172		1.0811	1.15785	1.21272	1.19368	1.18919	1.37611	1.37608	1.74929	1.0366	1.20517		1.40155	7.20952	1.08753	1.12358	1.10078	1.19799	1.04082	1.12842	1.033	1.03375		1.22994	1.08844	1.23714	1.17115	1.11027	1.04829	1.13712	1.07825	1.02773	1.05609		1.09293	1.04273	1.29585	1.06729	1.04053	1.03171
1.04197	1.06505	1.03313	1.13509	1.1547	1.38543	1.13315	1.05979	1.04209	1.04705		1.08017	1.14983	1.20744	1.19514	1.18805	1.3812	1.39663	1.73558	1.03724	1.20643		1.40774	8.06234	1.1058	1.15016	1.10761	1.15277	1.03451	1.12228	1.03791	1.06059		1.22276	1.08966	1.23889	1.16529	1.09513	1.04998	1.16964	1.08182	1.04303	1.05785		1.14085	1.04348	1.29677	1.0551	1.04647	1.03258
1.04545	1.06437	1.03285	1.1569	1.13737	1.33807	1.10922	1.04777	1.05786	1.05302		1.08239	1.14995	1.21368	1.19488	1.16433	1.38905	1.40493	1.73021	1.03247	1.20059		1.21809	7.54828	1.11718	1.17431	1.1179	1.15081	1.03743	1.11134	1.04265	1.06652		1.22013	1.08383	1.23564	1.1692	1.09363	1.04297	1.15956	1.06789	1.03851	1.10764		1.08486	1.04233	1.29001	1.07846	1.03602	1.02717
1.04248	1.05113	1.02515	1.15242	1.10784	1.36471	1.07229	1.05287	1.05415	1.05438		1.08033	1.15129	1.20511	1.19386	1.16699	1.39668	1.34766	1.75527	1.03001	1.20206		1.44833	7.7827	1.10076	1.19901	1.11706	1.23855	1.01035	1.14317	1.04935	1.07189		1.21348	1.08587	1.23471	1.16405	1.09512	1.04156	1.16976	1.0602	1.04852	1.07679		1.06781	1.06302	1.28946	1.06702	1.02289	1.03651
1.04736	1.08324	1.03669	1.16358	1.23662	1.35645	1.26527	1.06299	1.06576	1.05222		1.07408	1.16278	1.20729	1.19375	1.15804	1.41892	1.38041	1.74298	1.02911	1.20431		1.38	8.04692	1.08717	1.20509	1.14501	1.209	1.05112	1.15362	1.04756	1.09121		1.21209	1.0733	1.23808	1.18631	1.10258	1.04214	1.17321	1.06067	1.06173	1.09922		1.07759	1.03323	1.29455	1.05542	1.03861	1.04016
1.04511	1.06435	1.0351	1.15473	1.23929	1.38266	1.37981	1.08258	1.05065	1.04901		1.07772	1.16323	1.21113	1.19373	1.16024	1.43088	1.34757	1.72331	1.03902	1.19942		1.42937	7.11116	1.07268	1.22099	1.11641	1.19355	1.05375	1.14301	1.03975	1.07664		1.21203	1.064	1.23785	1.16912	1.08835	1.0394	1.16644	1.05056	1.01098	1.1003		1.13082	1.03034	1.27908	1.03461	1.04533	1.03748
1.05656	1.04394	1.03132	1.15343	1.23954	1.39913	1.29633	1.06218	1.04703	1.04502		1.08296	1.14889	1.20156	1.19345	1.18396	1.42988	1.37729	1.67902	1.03219	1.19946		1.203	6.12447	1.10194	1.22591	1.147	1.14793	1.04458	1.14025	1.04169	1.06437		1.22185	1.05616	1.23062	1.1782	1.06462	1.03774	1.1508	1.05575	1.04337	1.06506		1.06703	1.0414	1.2774	1.04352	1.03484	1.0292
1.05706	1.0354	1.03782	1.144	1.15783	1.37739	1.23745	1.07214	1.06156	1.05414		1.08681	1.16638	1.20317	1.19391	1.17074	1.43322	1.37701	1.72242	1.03702	1.20096		1.04142	5.2646	1.1096	1.22317	1.10774	1.08829	1.05357	1.13431	1.04449	1.05523		1.20675	1.0602	1.23434	1.17267	1.06669	1.03882	1.15586	1.06867	1.04934	1.06586		1.1151	1.03331	1.29156	1.06625	1.0332	1.04069
1.04966	1.03152	1.05018	1.15602	1.05597	1.34844	1.20446	1.07227	1.06313	1.05208		1.08451	1.15583	1.19706	1.19213	1.16357	1.43821	1.3774	1.75602	1.03664	1.20047		1.25268	4.50224	1.11831	1.23267	1.08535	1.2527	1.05191	1.1342	1.04837	1.10151		1.22127	1.06139	1.23662	1.17758	1.08473	1.03658	1.1495	1.05588	1.03025	1.08228		1.08343	1.03866	1.29604	1.0614	1.00999	1.03763
1.04788	1.04841	1.03677	1.14819	1.08326	1.41466	1.18809	1.06752	1.05271	1.05238		1.08472	1.16698	1.20036	1.19375	1.16926	1.43935	1.3921	1.73968	1.04629	1.19966		1.20261	3.91364	1.09389	1.21777	1.11072	1.1555	1.06266	1.14455	1.05547	1.05381		1.22006	1.0703	1.23754	1.18461	1.07458	1.03684	1.18358	1.05598	1.02671	1.07727		1.1382	1.05169	1.29235	1.0693	1.0233	1.03292
1.05008	1.06249	1.03912	1.15295	1.09194	1.42965	1.14388	1.06788	1.06617	1.05279		1.08085	1.16246	1.19422	1.19502	1.15	1.44592	1.38548	1.78037	1.04299	1.19989		1.17989	3.39436	1.11033	1.20161	1.14652	1.20577	1.02199	1.12048	1.06024	1.06989		1.21885	1.0928	1.22239	1.17938	1.10874	1.02933	1.1625	1.06009	1.05947	1.07525		1.0957	1.04212	1.29063	1.0719	1.03176	1.03353
1.04855	1.01865	1.03151	1.12505	1.15986	1.40211	1.26874	1.0662	1.06967	1.05273		1.08245	1.15396	1.18959	1.19829	1.19143	1.46425	1.38373	1.75855	1.047	1.19284		1.19279	2.99228	1.10675	1.19182	1.14976	1.22968	1.0399	1.14546	1.05155	1.07937		1.22096	1.0936	1.22713	1.18677	1.08794	1.02798	1.17915	1.05377	1.03929	1.08751		1.11611	1.04871	1.27898	1.07136	1.03582	1.0387
1.06533	1.06823	1.03313	1.12086	1.07232	1.38602	1.49127	1.05091	1.07085	1.05479		1.08574	1.15466	1.18954	1.20061	1.17386	1.47516	1.38377	1.73478	1.04416	1.19573		1.20525	2.6865	1.07791	1.19457	1.13937	1.1092	1.03562	1.13193	1.05003	1.07146		1.2138	1.09113	1.2294	1.19448	1.09529	1.02583	1.17539	1.04863	1.0472	1.07207		1.04043	1.05356	1.28787	1.0628	1.02566	1.04082
1.06329	1.0581	1.02359	1.14254	1.08165	1.35128	1.37058	1.07718	1.05203	1.05343		1.08347	1.16684	1.1931	1.20012	1.17558	1.47317	1.36891	1.76276	1.04242	1.19589		1.25679	2.40698	1.07615	1.18653	1.13119	1.25196	1.05026	1.1392	1.04689	1.0793		1.21053	1.09003	1.22189	1.17763	1.10124	1.03145	1.15758	1.04737	1.0709	1.08576		1.06502	1.04585	1.29439	1.04262	1.02195	1.03675
1.07268	1.04793	1.05199	1.10334	1.14815	1.3277	1.31496	1.06986	1.06598	1.0402		1.0773	1.16753	1.1914	1.20031	1.18638	1.48033	1.3826	1.77381	1.04154	1.19871		1.2207	2.20103	1.05787	1.1926	1.13384	1.19411	1.0309	1.15376	1.05043	1.08267		1.20501	1.08816	1.22822	1.17447	1.09992	1.03436	1.18569	1.04794	1.05972	1.08391		1.11135	1.0431	1.26626	1.05346	1.02219	1.03265
1.05741	1.0328	1.03846	1.12739	1.10983	1.39995	1.24671	1.05646	1.04564	1.04699		1.07949	1.16087	1.19185	1.20008	1.17244	1.48334	1.37058	1.73921	1.04181	1.19147		1.39158	2.03279	1.06464	1.18277	1.13796	1.23663	1.06187	1.10937	1.05117	1.0576		1.19785	1.08418	1.22559	1.17486	1.10374	1.0313	1.18303	1.05563	1.06476	1.08253		1.10313	1.03988	1.28991	1.07878	1.03688	1.02761
1.05813	1.0743	1.03355	1.11842	1	1.37841	1.20349	1.06626	1.05097	1.05062		1.08511	1.15908	1.19626	1.20013	1.18282	1.48846	1.41387	1.74384	1.04309	1.19504		1.44493	1.87882	1.0936	1.20772	1.1459	1.20721	1.05285	1.14646	1.04455	1.0704		1.18821	1.08376	1.22553	1.18163	1.09908	1.03116	1.1446	1.05849	1.07542	1.09749		1.06902	1.03732	1.28229	1.09732	1.03672	1.03368
1.05237	1.04588	1.04198	1.11294	1.11018	1.33519	1.16742	1.05959	1.06734	1.05405		1.08526	1.16286	1.20521	1.19582	1.15982	1.49828	1.38111	1.68572	1.04417	1.19525		1.31003	1.77885	1.11261	1.22753	1.11867	1.19366	1.05299	1.12543	1.04761	1.07014		1.19728	1.07127	1.22191	1.18397	1.08822	1.02756	1.18569	1.04264	1.06636	1.09079		1.05309	1.04386	1.3036	1.06681	1.04025	1.03291
1.05624	1.05533	1.03087	1.12484	1.15993	1.36001	1.16007	1.06764	1.05027	1.05307		1.08178	1.15866	1.20724	1.19622	1.14502	1.5237	1.39508	1.7489	1.03996	1.19494		1.32793	1.69299	1.11286	1.21416	1.10694	1.15138	1.03738	1.11012	1.04301	1.07481		1.18968	1.06226	1.23027	1.17129	1.06012	1.02742	1.17678	1.05586	1.04396	1.07584		1.08499	1.02895	1.2916	1.07109	1.02393	1.0306
1.06465	1.02362	1.05198	1.11326	1.18212	1.37801	1.28855	1.05478	1.05585	1.05724		1.07848	1.15393	1.21532	1.19725	1.17118	1.53792	1.40726	1.73041	1.04394	1.19329		1.13425	1.61986	1.12042	1.21922	1.11428	1.15501	1.01907	1.11732	1.04764	1.07747		1.18468	1.06207	1.22554	1.17383	1.07724	1.03644	1.14518	1.05383	1.04284	1.10852		1.06632	1.04323	1.2991	1.07842	1.01341	1.03322
1.04098	1.07295	1.05635	1.10278	1.04833	1.36128	1.48245	1.05985	1.06676	1.0574		1.07856	1.16201	1.21327	1.19798	1.16861	1.54009	1.43038	1.73	1.04019	1.19183		1.18894	1.57332	1.10103	1.18544	1.10921	1.1742	1.0559	1.13244	1.04296	1.08088		1.17802	1.06936	1.2273	1.1887	1.07695	1.03432	1.1994	1.0556	1.09603	1.0806		1.03755	1.04325	1.31143	1.05412	1.0178	1.03048
1.05074	1.05408	1.03585	1.10811	1.12952	1.35067	1.44057	1.05297	1.0594	1.05048		1.08575	1.16794	1.21714	1.19883	1.16283	1.54509	1.41801	1.73541	1.04511	1.18871		1.27409	1.50969	1.13589	1.19026	1.07968	1.24539	1.05721	1.11896	1.04124	1.07231		1.17428	1.07234	1.22336	1.18369	1.08695	1.02816	1.16509	1.06144	1.05666	1.08922		1.03237	1.04802	1.30187	1.04729	1.02132	1.03568
1.05764	1.05247	1.06913	1.11425	1.05109	1.3931	1.32592	1.05654	1.05453	1.04585		1.07668	1.14346	1.21825	1.19973	1.1776	1.54449	1.39244	1.73536	1.04323	1.17793		1.2126	1.48342	1.12804	1.18813	1.10672	1.13366	1.05175	1.1327	1.04104	1.04531		1.17542	1.06345	1.23374	1.17181	1.08708	1.02363	1.15554	1.05439	1.06266	1.10331		1	1.03351	1.30902	1.06057	1.02845	1.03622
1.05454	1.08041	1.08031	1.11504	1.10043	1.3799	1.25124	1.06104	1.05036	1.04541		1.07625	1.14599	1.21393	1.20136	1.18112	1.54185	1.38808	1.72094	1.03628	1.18141		1.38476	1.44229	1.10059	1.20228	1.12918	1.2449	1.05155	1.15185	1.03634	1.07313		1.18134	1.06262	1.22923	1.17488	1.10316	1.01895	1.19168	1.05778	1.07183	1.10916		1.07057	1.04185	1.29906	1.04275	1.02652	1.03323
1.05639	1.0651	1.06762	1.11608	1.13367	1.37233	1.22286	1.0485	1.06168	1.04449		1.0779	1.13728	1.20599	1.19921	1.17641	1.55418	1.39465	1.73859	1.03661	1.17544		1.38457	1.42235	1.09011	1.19247	1.06657	1.14172	1.0573	1.14544	1.04131	1.04635		1.18421	1.05579	1.23097	1.16945	1.08712	1.01613	1.18242	1.0548	1.04014	1.10115		1.06638	1.04464	1.32298	1.04888	1.01458	1.02998
1.05423	1.03266	1.09435	1.12124	1.03744	1.41315	1.1658	1.05352	1.04736	1.04987		1.0762	1.16043	1.20591	1.19613	1.17706	1.55389	1.41355	1.70265	1.03165	1.17354		1.4368	1.39472	1.05592	1.20106	1.10462	1.17558	1.04804	1.15097	1.04829	1.05		1.18461	1.06613	1.23167	1.18226	1.10103	1.01874	1.17579	1.04472	1.0665	1.11778		1.07406	1.04207	1.30309	1.07996	1.03104	1.0279
1.05583	1.07394	1.08566	1.11874	1.01943	1.40991	1.14294	1.04522	1.03361	1.04496		1.07213	1.15908	1.1976	1.19578	1.18151	1.55227	1.40908	1.73452	1.0308	1.17582		1.37372	1.37495	1.06517	1.20586	1.07967	1.12389	1.05329	1.13067	1.0409	1.0572		1.18078	1.07587	1.23215	1.1676	1.10699	1.01787	1.20357	1.0417	1.02423	1.10687		1.01113	1.0399	1.31513	1.08964	1.01664	1.02703
1.06212	1.05945	1.0776	1.10721	1.06154	1.40982	1.16013	1.04474	1.0643	1.04856		1.0771	1.16143	1.19255	1.19587	1.18693	1.56984	1.38503	1.70899	1.03147	1.18167		1.10995	1.35642	1.06597	1.1889	1.09172	1.09777	1.01694	1.15305	1.04408	1.02927		1.18227	1.07934	1.23642	1.15952	1.08755	1.0208	1.17776	1.04336	1.05049	1.11306		1.06704	1.03848	1.30795	1.03852	1.01137	1.0316
1.05422	1.04253	1.08024	1.13425	1.11028	1.38904	1.20015	1.05465	1.06519	1.0487		1.07994	1.15099	1.1884	1.19283	1.1773	1.58927	1.40419	1.69106	1.02883	1.18478		1.0871	1.33303	1.07144	1.18641	1.10278	1.19261	1.04034	1.14806	1.04542	1.0553		1.18078	1.07308	1.23301	1.1753	1.10142	1.01236	1.19716	1.04173	1.0166	1.10339		1.0228	1.03924	1.31386	1.05933	1.02628	1.03011
1.06557	1.06538	1.07784	1.1187	1.05463	1.45621	1.27658	1.0514	1.0654	1.04984		1.07686	1.14689	1.18926	1.19287	1.17143	1.59363	1.38674	1.72629	1.03061	1.18542		1.16416	1.32018	1.05816	1.20731	1.12033	1.1053	1.05828	1.14733	1.04484	1.07019		1.1814	1.08495	1.23206	1.16842	1.12024	1.02202	1.19517	1.04514	1.03065	1.10032		1.06578	1.03377	1.32443	1	1.01808	1.02892
1.05749	1.06273	1.10153	1.12685	1.13503	1.45369	1.23567	1.0493	1.06119	1.04639		1.07846	1.15935	1.1918	1.19337	1.17207	1.58851	1.39947	1.71875	1.02693	1.19413		1.30236	1.30857	1.08209	1.22076	1.12216	1.16183	1.05734	1.1271	1.04406	1.06977		1.18572	1.08473	1.23355	1.16593	1.11534	1.02191	1.15964	1.03225	1.00009	1.09693		1.09255	1.03574	1.32163	1.0695	1.00486	1.0326
1.05492	1.04905	1.193	1.10703	1.07697	1.39478	1.19851	1.05004	1.06566	1.04689		1.08085	1.15907	1.18593	1.18939	1.17638	1.58607	1.41483	1.69048	1.02703	1.19417		1.2957	1.30158	1.10417	1.20497	1.12734	1.11523	1.06225	1.12355	1.04508	1.06773		1.18254	1.07211	1.23306	1.18371	1.11649	1.01994	1.18867	1.02864	1.02076	1.10171		1.06059	1.04195	1.31705	1.11746	1.01574	1.02762
1.05144	1.05319	1.24587	1.11828	1.06755	1.35078	1.15997	1.03716	1.05264	1.04917		1.08083	1.15874	1.18297	1.18671	1.16033	1.57979	1.40325	1.73037	1.02841	1.20442		1.24093	1.29115	1.12393	1.17413	1.09186	1.20574	1.05474	1.15837	1.04726	1.07409		1.17913	1.06471	1.23197	1.1816	1.11414	1.023	1.15936	1.02873	1.01436	1.10824		1.09814	1.0358	1.3241	1.07395	1.02087	1.03138
1.05146	1.0809	1.259	1.12714	1.0915	1.44535	1.15192	1.0431	1.06845	1.04292		1.08055	1.17155	1.17714	1.18866	1.17605	1.5811	1.39381	1.70056	1.0217	1.20101		1.18651	1.28502	1.12456	1.14142	1.09846	1.21068	1.06061	1.17718	1.07121	1.07942		1.17862	1.07038	1.2298	1.16204	1.10111	1.01916	1.18101	1.03243	1.06177	1.10773		1.04987	1.04519	1.32138	1.06054	1	1.02925
1.05495	1.06955	1.27347	1.11898	1.15918	1.41999	1.15083	1.03922	1.0779	1.05079		1.07777	1.17262	1.17541	1.19015	1.17726	1.58211	1.38821	1.70828	1.01867	1.1911		1.13608	1.27263	1.12061	1.12831	1.07317	1.1932	1.03063	1.1725	1.05857	1.07218		1.17114	1.0618	1.23664	1.1559	1.08318	1.02104	1.19284	1.03387	1.0349	1.12808		1.0282	1.04115	1.33259	1.0599	1.01602	1.03052
1.05775	1.06724	1.27603	1.12258	1.18381	1.38167	1.42674	1.04935	1.05686	1.05446		1.07707	1.16765	1.17485	1.18744	1.16833	1.60356	1.39236	1.72932	1.02041	1.179		1.16475	1.26106	1.11017	1.13858	1.05629	1.18065	1.03142	1.18488	1.05765	1.09986		1.16882	1.06942	1.23574	1.16007	1.08451	1.02086	1.192	1.01948	1.00838	1.08846		1.05813	1.04275	1.32248	1.04734	1.00602	1.02598
1.05177	1.05617	1.28515	1.11991	1.13727	1.37611	1.39957	1.04371	1.05796	1.05133		1.07608	1.15994	1.1666	1.18775	1.19301	1.62085	1.40177	1.72327	1.02125	1.1733		1.14013	1.26199	1.1298	1.13328	1.08875	1.13176	1.03396	1.14181	1.0639	1.08868		1.16635	1.08813	1.23391	1.14804	1.10674	1.01528	1.19357	1.03479	1.03534	1.11449		1.04429	1.036	1.33008	1.04772	1.00331	1.02736
1.05146	1.07117	1.25347	1.116	1.05247	1.35635	1.35437	1.04178	1.06955	1.05046		1.08025	1.16689	1.16231	1.18891	1.17711	1.61493	1.40834	1.68385	1.02216	1.17106		1.36988	1.25313	1.10719	1.13999	1.07672	1.23217	1.05609	1.15307	1.05045	1.06457		1.1512	1.07708	1.2351	1.15804	1.10028	1.01046	1.18233	1.03245	1.01201	1.10284		1.05527	1.03638	1.33323	1.06416	1.01705	1.02793
1.0561	1.07133	1.2573	1.10909	1.05032	1.32542	1.29146	1.04534	1.05849	1.05241		1.08348	1.15766	1.16193	1.18943	1.18254	1.61212	1.42751	1.71181	1.02357	1.16483		1.23929	1.23384	1.11438	1.14155	1.06787	1.11797	1.03874	1.15724	1.0474	1.08153		1.15817	1.06757	1.23464	1.17421	1.09965	1.01452	1.21323	1.0377	1.02527	1.11181		1.10491	1.03922	1.32401	1.04513	1.00562	1.03501
1.05476	1.05344	1.26036	1.1136	1.10492	1.32471	1.24046	1.04842	1.06208	1.04722		1.07541	1.15861	1.15333	1.18954	1.18586	1.60767	1.40672	1.67269	1.02328	1.16291		1.16426	1.22226	1.11968	1.16752	1.08712	1.09885	1.05733	1.15654	1.04638	1.08715		1.16386	1.05683	1.23352	1.14991	1.10803	1.0139	1.17018	1.03618	1.02983	1.11799		1.05956	1.0279	1.324	1.06033	1.02247	1.03024
1.06734	1.03567	1.27259	1.10748	1.15178	1.31377	1.20663	1.04797	1.0553	1.0506		1.07968	1.17136	1.15373	1.18967	1.15986	1.60753	1.42672	1.70152	1.01734	1.15864		1.32918	1.21674	1.11771	1.17782	1.1015	1.16725	1.03389	1.16202	1.04137	1.06379		1.16366	1.04296	1.23551	1.15976	1.10561	1.01475	1.1565	1.0452	1.0347	1.10138		1.09744	1.04041	1.33563	1.04893	1.02504	1.02633
1.05718	1.06348	1.24051	1.13328	1.09435	1.27498	1.17867	1.03979	1.06124	1.04371		1.07698	1.15822	1.15184	1.18866	1.19879	1.61074	1.4118	1.70696	1.01664	1.15634		1.16752	1.21677	1.11034	1.16618	1.09365	1.1699	1.02351	1.17021	1.04849	1.0964		1.16602	1.06784	1.23398	1.16316	1.10154	1.01899	1.1834	1.01906	1	1.10424		1.06625	1.03729	1.3378	1.03639	1.0232	1.02959
1.05927	1.03037	1.22959	1.13949	1.00671	1.23365	1.33576	1.026	1.06737	1.04617		1.08291	1.16704	1.15637	1.18771	1.18935	1.60923	1.42829	1.71603	1.01256	1.15491		1.25661	1.21148	1.10235	1.17563	1.08198	1.11481	1.03244	1.13643	1.04564	1.06963		1.17515	1.08514	1.23578	1.15128	1.10097	1.00927	1.19216	1.03311	1.01214	1.09947		1.07859	1.03716	1.33284	1.04314	1.01913	1.02422
1.04237	1.04563	1.20531	1.12638	1.08022	1.24552	1.33458	1.0338	1.084	1.04576		1.08241	1.16667	1.15798	1.18861	1.17391	1.62762	1.43333	1.71669	1.01727	1.15478		1.27897	1.21726	1.09695	1.20167	1.06804	1.1755	1.03793	1.19293	1.04308	1.0662		1.17542	1.08441	1.23975	1.16065	1.11782	1.00954	1.1887	1.03271	1.02008	1.12685		1.05554	1.02821	1.31663	1.06601	1.0094	1.02712
1.04592	1.04096	1.23005	1.1237	1.14451	1.27275	1.27217	1.0413	1.04245	1.03625		1.08349	1.16954	1.15275	1.18745	1.18924	1.63567	1.42452	1.67509	1.01636	1.15536		1.3362	1.20347	1.1153	1.21878	1.08473	1.1681	1.0277	1.13114	1.03612	1.07349		1.18006	1.08003	1.24079	1.16153	1.11456	1.00864	1.21365	1.03043	1.03883	1.0979		1.03672	1.03536	1.34524	1.08709	1.01692	1.02791
1.05567	1.0126	1.20839	1.12772	1.13863	1.23249	1.28221	1.03711	1.07774	1.04844		1.08061	1.16347	1.14945	1.18946	1.18491	1.51726	1.45267	1.71789	1.01738	1.15568		1.22889	1.20068	1.12938	1.24227	1.07364	1.11005	1.04253	1.15122	1.04017	1.07395		1.17781	1.08953	1.23611	1.17057	1.11453	1.01066	1.22261	1.02904	1.00604	1.10319		1.025	1.03878	1.34915	1.07827	1.02187	1.03715
1.06048	1.03073	1.18632	1.12185	1.0857	1.24988	1.21096	1.04315	1.08657	1.05357		1.08212	1.16547	1.15595	1.19255	1.17566	1.52544	1.44283	1.69667	1.01352	1.1556		1.28782	1.19149	1.12178	1.26593	1.09128	1.19967	1.03706	1.15173	1.03795	1.08421		1.17589	1.08601	1.23394	1.15701	1.10658	1.01587	1.19612	1.03327	1.04576	1.10877		1.05239	1.02229	1.32458	1.0519	1.01611	1.02776
1.05745	1.05513	1.19555	1.12279	1.14215	1.24573	1.17306	1.03548	1.06206	1.04384		1.08099	1.1766	1.14743	1.19277	1.16679	1.54047	1.46584	1.66925	1.01527	1.14907		1.15532	1.18522	1.13461	1.31881	1.06785	1.16756	1.0258	1.14521	1.03327	1.0603		1.17589	1.08049	1.23259	1.15901	1.10649	1.01746	1.19224	1.03128	1.00659	1.08248		1.10286	1.03765	1.33995	1.05177	1.02584	1.03154
1.06726	1.03676	1.1547	1.15627	1.25347	1.26319	1.16849	1.04013	1.05481	1.03637		1.08313	1.16405	1.14775	1.19147	1.16389	1.54989	1.45057	1.7045	1.01468	1.15163		1.24128	1.17764	1.12296	1.32551	1.10297	1.1205	1.03789	1.19112	1.04537	1.08398		1.17207	1.08052	1.23678	1.15493	1.12539	1.02173	1.19005	1.03983	1.01377	1.08784		1.07235	1.02835	1.34804	1.07478	1.01391	1.02605
1.07239	1.0584	1.15946	1.12658	1.24107	1.29125	1.13722	1.03345	1.08182	1.0472		1.08236	1.16835	1.14172	1.19065	1.18242	1.56316	1.40646	1.68528	1.01486	1.1556		1.26663	1.17998	1.13783	1.29638	1.09805	1.21557	1.05931	1.15681	1.04809	1.09237		1.16949	1.07439	1.23395	1.16661	1.11246	1.01385	1.19439	1.03335	1.01479	1.12722		1.09748	1.0397	1.32808	1.02129	1.01657	1.03096
1.06975	1.0526	1.17192	1.12579	1.23064	1.31492	1.16007	1.02537	1.03597	1.04396		1.08363	1.18339	1.13768	1.19265	1.19026	1.58215	1.44671	1.68947	1.01096	1.15129		1.18835	1.17371	1.13758	1.28888	1.0991	1.0572	1.06591	1.17721	1.04356	1.07818		1.16719	1.06852	1.24101	1.15963	1.0724	1.01083	1.18574	1.03958	1.02614	1.11246		1.09977	1.03555	1.35279	1.043	1.00809	1.02614
1.07156	1.01573	1.16142	1.12787	1.05093	1.33284	1.39487	1.03497	1.0797	1.05352		1.089	1.16719	1.14605	1.19212	1.18295	1.60598	1.46464	1.69926	1.01283	1.15773		1.23043	1.17507	1.1177	1.24373	1.10486	1.11241	1.06275	1.11286	1.04029	1.08248		1.16169	1.06821	1.23963	1.1646	1.08064	1.01233	1.16957	1.04266	1.04197	1.09105		1.06834	1.02882	1.34173	1.08259	1.01425	1.02653
1.07134	1.01255	1.1612	1.13323	1.07833	1.33744	1.41314	1.0294	1.03752	1.04631		1.08002	1.15313	1.13884	1.19457	1.1658	1.61185	1.43933	1.69949	1.0125	1.16814		1.12261	1.17046	1.11223	1.20238	1.08989	1.16306	1.03854	1.1446	1.03742	1.0675		1.17028	1.07212	1.23578	1.16268	1.07755	1.00405	1.19762	1.06665	1.07353	1.12634		1.08404	1.02857	1.34729	1.03487	1.00221	1.02378
1.06833	1.03559	1.14522	1.12093	1.12372	1.37218	1.34564	1.03275	1.0677	1.04024		1.07879	1.16663	1.14503	1.19443	1.18903	1.61175	1.42667	1.73101	1.01409	1.168		1.07513	1.17033	1.09158	1.19115	1.08445	1.12417	1.06498	1.14065	1.04102	1.06655		1.1692	1.07321	1.23607	1.17033	1.08811	1.01092	1.18882	1.04226	1.04562	1.1124		1.08533	1.03012	1.34898	1.06933	1.00605	1.02744
1.07188	1.00949	1.13978	1.12197	1.14922	1.27367	1.30217	1.02381	1.06727	1.04089		1.08171	1.1656	1.14996	1.19313	1.18496	1.60754	1.41632	1.73346	1.01111	1.16745		1.09974	1.15983	1.09425	1.18616	1.09822	1.11462	1.0241	1.15928	1.03728	1.04834		1.16958	1.0605	1.24174	1.17822	1.10358	1.01528	1.17568	1.03898	1.02927	1.1093		1.07395	1.02588	1.33813	1.05209	1.01731	1.02947
1.06433	1.04461	1.14202	1.11274	1.0863	1.06759	1.258	1.0337	1.0679	1.05062		1.08218	1.15794	1.1524	1.19205	1.18246	1.60684	1.4512	1.73821	1.01156	1.17415		1.06673	1.15274	1.07982	1.21396	1.07927	1.17556	1.03438	1.11775	1.02883	1.06869		1.17285	1.06665	1.23943	1.17215	1.10473	1.01463	1.20844	1.05876	1.01945	1.10861		1.07252	1.02278	1.34045	1.07692	1.02163	1.02824
1.07968	1.05659	1.13468	1.1265	1.10463	1.01509	1.22189	1.03699	1.06035	1.04305		1.08462	1.1783	1.14987	1.19284	1.1779	1.59463	1.40724	1.70561	1.01025	1.17876		1.15166	1.15095	1.09115	1.20744	1.08473	1.18033	1.04546	1.13633	1.0353	1.06063		1.16937	1.06302	1.23745	1.16925	1.10026	1.01792	1.22147	1.0437	1.05488	1.11219		1.07025	1.02249	1.34977	1.06634	1.00683	1.02374
1.06468	1.00547	1.12367	1.10692	1.12073	1.03883	1.21569	1.03505	1.07229	1.03414		1.08336	1.17487	1.1457	1.19449	1.18488	1.59493	1.39801	1.70268	1.00875	1.17835		1.31136	1.15027	1.07387	1.19944	1.08543	1.22488	1.07203	1.12548	1.03262	1.04051		1.17076	1.04842	1.23998	1.17269	1.10442	1.01642	1.19599	1.04104	1.04712	1.11832		1.09715	1.01946	1.3537	1.06225	1.01601	1.03285
1.06631	1.01633	1.12245	1.10701	1.10038	1.0332	1.20086	1.03233	1.06934	1.04408		1.07999	1.16641	1.14583	1.19749	1.18879	1.5945	1.42969	1.72235	1.01262	1.18676		1.28884	1.14941	1.08736	1.16806	1.06347	1.16672	1.0667	1.12132	1.0311	1.05879		1.16795	1.04476	1.24155	1.19093	1.08285	1.01684	1.20524	1.03516	1.01609	1.12528		1.06789	1.01434	1.36005	1.04484	1.01615	1.03435
1.07743	1.00668	1.10933	1.10999	1.20332	1	1.30928	1.03547	1.05911	1.04237		1.08148	1.17287	1.14436	1.19948	1.18758	1.58042	1.44888	1.73106	1.01478	1.19459		1.15275	1.14132	1.09913	1.14528	1.10206	1.13474	1.03663	1.14101	1.03341	1.07078		1.16794	1.04655	1.2363	1.17026	1.08844	1.01112	1.19019	1.03015	1.06304	1.1079		1.04687	1.02082	1.33922	1.07144	1.01309	1.02982
1.07253	1.03341	1.11798	1.12927	1.21384	1.03155	1.27794	1.0372	1.04817	1.04451		1.07916	1.17299	1.13753	1.19709	1.1586	1.57167	1.44104	1.72113	1.01098	1.19574		1.29547	1.13757	1.10342	1.12943	1.06794	1.21097	1.05979	1.1254	1.02621	1.07824		1.15928	1.04926	1.23568	1.18272	1.09665	1.0082	1.18307	1.02576	1.00754	1.07602		1.06149	1.01432	1.35496	1.12088	1.01384	1.02724
1.05997	1.01508	1.11737	1.10728	1.10521	1.02883	1.26272	1.03656	1.08055	1.0554		1.07862	1.17418	1.13397	1.19971	1.14415	1.56884	1.45296	1.715	1.01207	1.19187		1.18833	1.13839	1.07168	1.13351	1.10721	1.14899	1.06988	1.11377	1.0299	1.04194		1.16265	1.03889	1.23812	1.17109	1.1106	1.00571	1.2027	1.04633	1.03249	1.08817		1.06259	1.02682	1.33701	1.08593	1.02016	1.02533
1.0571	1.0415	1.08736	1.10672	1.0741	1.03288	1.23733	1.03721	1.06213	1.04941		1.08384	1.1502	1.13326	1.1979	1.17381	1.56282	1.4598	1.68691	1.01364	1.20446		1.29928	1.13734	1.07912	1.12429	1.06781	1.15881	1.02853	1.13402	1.03197	1.05614		1.1657	1.0256	1.23805	1.16257	1.11183	1.0122	1.18047	1.03588	1.03421	1.07164		1.08732	1.02268	1.33111	1.07509	1.0039	1.02821
1.0668	1.03065	1.11185	1.11674	1.10152	1.00057	1.19334	1.03785	1.06267	1.04757		1.07821	1.14426	1.13073	1.19661	1.14952	1.54456	1.44686	1.71642	1.01113	1.20738		1.32198	1.13244	1.08137	1.13081	1.06479	1.10788	1.02908	1.1063	1.03466	1.07103		1.16525	1.02498	1.23745	1.17837	1.13298	1.01292	1.18675	1.03358	1.03879	1.06365		1.12767	1.02225	1.33326	1.03746	1.01774	1.02767
1.06127	1.02649	1.10331	1.10928	1.19102	1.00427	1.16139	1.03712	1.06338	1.05007		1.07696	1.16359	1.12865	1.19612	1.15358	1.54061	1.4637	1.72442	1.00848	1.21155		1.21611	1.12907	1.06016	1.14462	1.08385	1.17748	1.06063	1.15219	1.03126	1.06832		1.17882	1.04233	1.24323	1.18342	1.10394	1.00186	1.17994	1.03409	1.03886	1.07724		1.05583	1.02734	1.32482	1.01755	1.01001	1.02845
1.05784	1.02707	1.1042	1.11691	1.11705	1.00783	1.28176	1.03163	1.07748	1.05021		1.07819	1.14552	1.13162	1.19568	1.16315	1.53615	1.43892	1.72142	1.00936	1.2172		1.21556	1.13013	1.0947	1.15919	1.06008	1.1837	1.0456	1.12624	1.02731	1.06764		1.17237	1.06044	1.24273	1.16729	1.11869	1.00653	1.15739	1.03442	1.02713	1.04856		1.04788	1.0048	1.34604	1.04407	1.00204	1.02796
1.06796	1.00718	1.11742	1.12177	1.06154	1.06744	1.45093	1.02437	1.05227	1.04516		1.08026	1.15674	1.13581	1.19449	1.15705	1.53579	1.44519	1.73356	1.00756	1.22212		1.28547	1.12937	1.11332	1.14232	1.07801	1.1934	1.04512	1.12045	1.02877	1.0781		1.16506	1.0552	1.241	1.16646	1.10959	1.00998	1.18256	1.03285	1.01718	1.04428		1.07925	1.01612	1.35116	1.06129	1.0192	1.03044
1.07225	1.00367	1.09887	1.13816	1.12333	1.23086	1.43565	1.03255	1.06972	1.0493		1.07902	1.15923	1.13401	1.19296	1.17269	1.52277	1.41602	1.72692	1.0063	1.22896		1.22434	1.11964	1.1274	1.13408	1.08128	1.12687	1.05974	1.12848	1.02865	1.09746		1.15684	1.05578	1.24179	1.15818	1.09476	1.01438	1.17141	1.04787	1.0054	1.07604		1.01422	1.01982	1.34598	1.06497	1.02754	1.02458
1.07527	1.02215	1.10341	1.13536	1.06554	1.33745	1.3361	1.0357	1.06722	1.04286		1.07793	1.15124	1.12931	1.19539	1.14591	1.51227	1.41048	1.69479	1.00974	1.23753		1.31225	1.12401	1.13265	1.13446	1.07089	1.05732	1.04028	1.13551	1.02927	1.09155		1.15825	1.0593	1.24853	1.16892	1.09885	1.01437	1.19043	1.04284	1.05655	1.03471		1.10104	1.00911	1.35838	1.07317	1.0325	1.02745
1.06757	1.01275	1.09627	1.15964	1.05363	1.34848	1.30819	1.03896	1.07943	1.05093		1.08037	1.14232	1.12796	1.1973	1.15735	1.50412	1.4398	1.72789	1.0067	1.24517		1.14401	1.12202	1.13886	1.1693	1.0369	1.13741	1.07169	1.13404	1.03255	1.10689		1.17118	1.04962	1.24635	1.15874	1.07729	1.01075	1.16304	1.03929	1.02435	1.02504		1.07119	1.01319	1.3555	1.08253	1.02769	1.02506
1.06604	1.03621	1.11077	1.16276	1.17155	1.40487	1.25404	1.03154	1.05545	1.04253		1.08296	1.14413	1.12575	1.19883	1.13726	1.4933	1.44854	1.69537	1.00574	1.23935		1.31394	1.11541	1.15037	1.19156	1.04365	1.18413	1.06977	1.13449	1.02941	1.11199		1.1692	1.06507	1.24878	1.15713	1.06422	1.00819	1.15772	1.0483	1.07559	1.02551		1.10148	1.02553	1.34022	1.05094	1.01926	1.02375
1.06578	1.02926	1.08431	1.16168	1.12286	1.32048	1.22033	1.0296	1.0726	1.04144		1.08047	1.14191	1.12336	1.20182	1.13363	1.4826	1.45237	1.70103	1.00161	1.24754		1.23486	1.11766	1.12984	1.17809	1.00906	1.07477	1.03446	1.13847	1.03466	1.08167		1.16702	1.08044	1.24831	1.15438	1.09606	1.00623	1.18344	1.05478	1.03538	1.04816		1.09673	1.01901	1.35107	1.09075	1.01225	1.03013
1.07235	1.03965	1.08599	1.15116	1.14107	1.28992	1.20194	1.04575	1.05297	1.04343		1.07613	1.14068	1.12089	1.20033	1.15162	1.4754	1.42803	1.69701	1.0052	1.25776		1.14193	1.1193	1.13473	1.17589	1.02648	1.05497	1.03946	1.13217	1.02995	1.11593		1.1669	1.0768	1.25218	1.15873	1.10676	1.00558	1.14189	1.0467	1.02342	1.05251		1.05209	1.00741	1.35179	1.07496	1.02643	1.02708
1.07061	1.02582	1.0938	1.16153	1.16456	1.3298	1.16585	1.03439	1.06767	1.04715		1.07917	1.14103	1.12619	1.19831	1.15604	1.46252	1.4195	1.66182	1.00737	1.26353		1.27262	1.11493	1.11248	1.20314	1.04223	1.12226	1.03993	1.13095	1.02817	1.1087		1.17325	1.06998	1.24738	1.16966	1.09101	1.00946	1.17845	1.041	1.03732	1.03351		1.01153	1.02174	1.37087	1.04838	1.02862	1.02334
1.06501	1.00708	1.08459	1.16836	1.10389	1.30186	1.19805	1.05007	1.07527	1.03962		1.08024	1.13817	1.11729	1.19693	1.14643	1.45896	1.46438	1.61991	1.00552	1.26989		1.23021	1.10889	1.10766	1.18117	1.03514	1.15486	1.04169	1.13792	1.02278	1.08464		1.17266	1.09945	1.2459	1.16332	1.09832	1.01311	1.16227	1.04653	1.04139	1.0319		1.09088	1.01711	1.37012	1.04397	1.0205	1.02788
1.04917	1.04067	1.09224	1.17551	1.04345	1.29954	1.37509	1.03539	1.08116	1.03		1.08498	1.14091	1.12097	1.19358	1.14308	1.45301	1.42013	1.70632	1.0052	1.28027		1.29107	1.11421	1.09175	1.18804	1.05472	1.11795	1.02655	1.11179	1.02328	1.07649		1.1762	1.09827	1.24839	1.15285	1.10913	1.01295	1.17069	1.04555	1.02681	1.04906		1.10857	1.01297	1.36272	1.05004	1.01545	1.02409
1.05858	1.0334	1.08786	1.18585	1.01815	1.26592	1.3817	1.04554	1.06549	1.02115		1.08512	1.13092	1.12002	1.19222	1.16089	1.44354	1.44121	1.77253	1.00468	1.28754		1.27324	1.1074	1.10786	1.18223	1.04845	1.12656	1.06059	1.08975	1.01828	1.10428		1.1669	1.09327	1.25117	1.15876	1.10987	1.01116	1.18405	1.03952	1.02146	1.02533		1.05335	1.01351	1.35787	1.05006	1.02277	1.03066
1.05897	1	1.1035	1.1944	1.18199	1.2561	1.29819	1.03452	1.06837	1.02018		1.08095	1.13133	1.11592	1.19074	1.16102	1.43339	1.44401	1.71231	1.01128	1.28807		1.16627	1.1077	1.11179	1.21977	1.02463	1.22595	1.07245	1.12132	1.02699	1.11596		1.1617	1.07469	1.25552	1.15447	1.09036	1.01073	1.19094	1.0482	1.02312	1.03625		1.05514	1.02006	1.36023	1.08003	1.00779	1.0311
1.05512	1.02762	1.09043	1.19018	1.13751	1.26541	1.23799	1.04941	1.04744	1.02207		1.07628	1.13582	1.11561	1.19045	1.13764	1.42323	1.45007	1.68733	1.00819	1.28931		1.16521	1.10667	1.1431	1.22704	1.04049	1.16165	1.07489	1.1224	1.02583	1.09031		1.15704	1.08171	1.25201	1.16759	1.10761	1.01256	1.17087	1.04817	1.02763	1.03654		1.06058	1.02115	1.3697	1.03454	1.0104	1.03147
1.04941	1.03026	1.11196	1.19232	1.09931	1.26335	1.18972	1.0466	1.05846	1.02077		1.07544	1.1372	1.12105	1.18928	1.15152	1.42541	1.43219	1.70982	1.00745	1.28478		1.23747	1.11097	1.10848	1.22598	1.06597	1.12778	1.07617	1.12924	1.0227	1.07782		1.16284	1.10293	1.25283	1.15612	1.10385	1.00687	1.1871	1.0531	1.03424	1.02163		1.15091	1.01851	1.38682	1.05152	1.03036	1.03426
1.04902	1.02817	1.08162	1.21006	1.0997	1.24124	1.1864	1.03693	1.06212	1.01797		1.08163	1.14578	1.12275	1.18764	1.16235	1.41721	1.41386	1.71972	1	1.28741		1.14858	1.11297	1.12721	1.20614	1.03884	1.15473	1.07745	1.11274	1.01739	1.08264		1.15943	1.11229	1.24609	1.15401	1.11992	1.00868	1.14137	1.05007	1.03032	1.01437		1.09398	1.00293	1.38078	1.05642	1.01728	1.03538
1.04392	1.03419	1.10202	1.19178	1.05536	1.23635	1.15662	1.04021	1.07382	1.02476		1.08452	1.13792	1.12132	1.188	1.13694	1.40968	1.43467	1.70469	1.00147	1.29744		1.23437	1.10735	1.1243	1.19989	1.0125	1.12152	1.04084	1.13467	1.01606	1.07696		1.15757	1.10258	1.25172	1.16587	1.10373	1.00846	1.18763	1.05101	1.02556	1.0015		1.07496	1.02496	1.38211	1.07568	1.03715	1.03157
1.04912	1.03395	1.08638	1.2306	1.18518	1.22733	1.15792	1.04179	1.05232	1.01854		1.08566	1.14669	1.12353	1.18603	1.15262	1.39808	1.38733	1.7176	1.00719	1.29765		1.14534	1.10372	1.15118	1.23156	1.03594	1.11035	1.07878	1.14564	1.01977	1.06851		1.15355	1.10391	1.24709	1.16148	1.09752	1.00851	1.15139	1.05682	1.01593	1.03767		1.05815	1.0182	1.36006	1.07306	1.01293	1.03556
1.04897	1.04947	1.09618	1.20752	1.17817	1.27227	1.14055	1.03468	1.07022	1.01809		1.08546	1.1394	1.12055	1.18561	1.14255	1.39258	1.42948	1.71466	1.00042	1.30377		1.35251	1.10954	1.14276	1.27239	1.06652	1.12591	1.07755	1.11234	1.01623	1.07709		1.16647	1.09673	1.25775	1.15875	1.12597	1.00879	1.18455	1.05766	1.02063	1.00865		1.09036	1.01648	1.37812	1.06539	1.02075	1.04019
1.05442	1.05108	1.07987	1.21279	1.16232	1.23995	1.12914	1.05863	1.0821	1.01541		1.08004	1.12564	1.12547	1.18787	1.16008	1.37954	1.43657	1.71232	1.00247	1.31156		1.18049	1.10358	1.13205	1.27334	1.06716	1.16894	1.0771	1.12494	1.01379	1.07791		1.16314	1.08892	1.26341	1.15452	1.11247	1.00816	1.17994	1.03411	1.00286	1.00246		1.03715	1.01699	1.37009	1.04384	1.01994	1.04295
1.06095	1.02279	1.07983	1.23541	1.12745	1.24046	1.11992	1.0409	1.07895	1.01316		1.07923	1.12869	1.12492	1.18877	1.14909	1.37402	1.38977	1.69514	1.00406	1.31597		1.28116	1.10288	1.12979	1.23347	1.03021	1.17819	1.07968	1.10393	1.0122	1.0718		1.15805	1.08434	1.25147	1.15819	1.11904	1.00151	1.18889	1.04476	1.00984	1.01096		1.06246	1.01872	1.37068	1.05343	1.0294	1.03656
1.06006	1.01964	1.08546	1.22565	1.04017	1.2521	1.10299	1.04249	1.06142	1.00982		1.0761	1.12213	1.12419	1.18971	1.15762	1.37263	1.43347	1.73754	1.00038	1.32474		1.07804	1.1008	1.11982	1.2159	1.02924	1.03589	1.07435	1.14393	1.01078	1.06245		1.16332	1.07576	1.25366	1.17132	1.10508	1.00571	1.21289	1.04663	1.006	1.00984		1.04798	1.0195	1.38058	1.06524	1.03115	1.03705
1.0557	1.02047	1.08684	1.2499	1.06489	1.24942	1.10535	1.04975	1.07636	1.00912		1.0825	1.13407	1.1291	1.19154	1.15307	1.36141	1.41936	1.71264	1.00006	1.32445		1.12582	1.09484	1.14343	1.22901	1.02669	1.02373	1.07913	1.10115	1.01177	1.05175		1.15128	1.06239	1.24798	1.15686	1.08625	1	1.18257	1.04998	1.01639	1.01629		1.09974	1.01765	1.38678	1.04877	1.04247	1.03695
1.0598	1.00935	1.09022	1.22584	1.16903	1.2207	1.10204	1.05219	1.07338	1.01205		1.07851	1.12947	1.12683	1.19144	1.16311	1.35807	1.45796	1.72034	1.00198	1.33237		1.22039	1.09708	1.14822	1.22015	1.03798	1.04095	1.08871	1.11479	1.00638	1.06638		1.15693	1.05629	1.25268	1.16305	1.11048	1.00354	1.19749	1.03632	1.01256	1.00595		1.00794	1.00782	1.37508	1.07761	1.03068	1.04
1.06072	1.01764	1.0736	1.21931	1.15518	1.20961	1.07524	1.05414	1.04652	1.00947		1.07918	1.1345	1.13661	1.18828	1.15956	1.3521	1.42135	1.73187	1.00093	1.34074		1.19564	1.09314	1.12612	1.19935	1.03326	1.1627	1.06977	1.10055	1.00779	1.05519		1.16096	1.06675	1.25841	1.16055	1.10757	1.00781	1.18934	1.04969	1.06129	1.00745		1.04565	1.01767	1.38345	1.05401	1.0178	1.03502
1.049	1.0318	1.07456	1.27969	1.16435	1.25328	1.06896	1.05703	1.078	1.01238		1.08462	1.13907	1.13151	1.18884	1.15259	1.35142	1.4163	1.68868	1.00047	1.33971		1.28098	1.09177	1.12782	1.21456	1.05165	1.18349	1.08519	1.08801	1.00934	1.06464		1.15596	1.06965	1.26185	1.16102	1.10671	1.00974	1.18583	1.03529	1.02857	1		1.06181	1.01546	1.35801	1.06501	1.04523	1.03503
1.05818	1.02951	1.07913	1.25758	1.06344	1.25698	1.05915	1.04754	1.08678	1.01004		1.08241	1.14544	1.13302	1.18901	1.15139	1.34685	1.45811	1.67293	1.00463	1.34628		1.11117	1.08101	1.14474	1.20747	1.00886	1.1712	1.0537	1.08129	1.013	1.05573		1.15249	1.08207	1.25844	1.16185	1.10589	1.00579	1.16557	1.03942	1.01084	1.01828		1.12434	1.01483	1.36041	1.07329	1.03577	1.02822
1.04293	1.03435	1.10127	1.25501	1.09683	1.24335	1.07994	1.0622	1.08611	1.00663		1.08102	1.14009	1.12854	1.18583	1.15736	1.33426	1.43151	1.6906	1.0052	1.34807		1.12288	1.08247	1.14227	1.21259	1.02623	1.0915	1.07111	1.07285	1.01652	1.08044		1.15956	1.07461	1.25903	1.16068	1.10308	1.00677	1.17077	1.05045	1.04102	1.062		1.0938	1.0212	1.3521	1.06007	1.02845	1.03028
1.04753	1.04095	1.08992	1.24666	1.12846	1.24265	1.05481	1.07727	1.06302	1.00406		1.0825	1.14067	1.13157	1.1858	1.16344	1.33056	1.42651	1.70368	1.00509	1.34953		1.16706	1.08794	1.16343	1.21226	1.02561	1.11788	1.06952	1.06711	1.01696	1.05983		1.17066	1.06088	1.25542	1.16972	1.11355	1.00828	1.15069	1.04972	1.04325	1.08474		1.04894	1.02259	1.35197	1.08151	1.0374	1.03172
1.0476	1.04124	1.09108	1.23486	1.17877	1.23142	1.09089	1.07573	1.06816	1.00739		1.08303	1.13763	1.12941	1.18443	1.15023	1.32151	1.41853	1.67908	1.00543	1.35799		1.22005	1.08192	1.12327	1.2208	1.02737	1.15931	1.08689	1.06453	1.00915	1.04832		1.17339	1.07059	1.26281	1.17319	1.09792	1.0065	1.17984	1.05283	1.02479	1.09396		1.0921	1.01833	1.34717	1.09634	1.02568	1.03415
1.05511	1.01093	1.06931	1.23125	1.05427	1.22205	1.05357	1.06636	1.06763	1.00732		1.08257	1.14362	1.13	1.18615	1.16612	1.31868	1.41708	1.64661	1.01014	1.35081		1.2611	1.08986	1.14603	1.2029	1.00559	1.18467	1.08429	1.08095	1.01058	1.06228		1.16827	1.08333	1.25741	1.16475	1.09043	1.00554	1.19597	1.04252	1.07186	1.1242		1.10111	1.01412	1.33686	1.05198	1.0226	1.03423
1.04807	1.03398	1.06489	1.22142	1.13281	1.22519	1.06481	1.06153	1.07143	1.00284		1.08502	1.15074	1.12685	1.1863	1.15602	1.31125	1.41457	1.68553	1.0085	1.3532		1.28825	1.08914	1.14195	1.21633	1.00487	1.08143	1.09243	1.08223	1.00967	1.06319		1.16336	1.08249	1.26366	1.1621	1.10643	1.00546	1.17958	1.03472	1.04625	1.06844		1.05299	1.00712	1.34941	1.04506	1.03786	1.03872
1.04815	1.03253	1.07701	1.25422	1.14533	1.21209	1.0559	1.07001	1.06708	1.00384		1.07831	1.15204	1.12479	1.18631	1.18513	1.30688	1.40952	1.66321	1.00647	1.36087		1.27565	1.08251	1.15399	1.23674	1	1.11567	1.04399	1.0646	1.01553	1.03648		1.16573	1.07211	1.26389	1.15653	1.10927	1.00364	1.17554	1.04555	1.05316	1.07441		1.09654	1.00711	1.32238	1.07382	1.03494	1.03985
1.04695	1.01936	1.07633	1.22873	1.15357	1.26857	1.0304	1.07316	1.06441	1.002		1.07469	1.14726	1.12119	1.18559	1.16869	1.30242	1.42816	1.70035	1.00458	1.35985		1.28285	1.08181	1.13741	1.23121	1.02072	1.08151	1.06476	1.07116	1.01333	1.05572		1.16591	1.06624	1.25961	1.17326	1.10245	1.00443	1.19236	1.05304	1.03953	1.05149		1.09245	1.01211	1.31882	1.06352	1.02988	1.03895
1.03909	1.02304	1.07775	1.22046	1.13383	1.21971	1.03923	1.06086	1.06007	1.00622		1.0779	1.14066	1.1206	1.18367	1.17532	1.30021	1.40189	1.71807	1.00308	1.35878		1.2569	1.06569	1.12136	1.22011	1.03784	1.08102	1.06239	1.0531	1.01544	1.04822		1.17241	1.07013	1.25884	1.16157	1.10303	1.0084	1.2033	1.05854	1.06718	1.07118		1.07137	1.02256	1.31697	1.0479	1.03162	1.03129
1.03781	1.03804	1.07718	1.23783	1.05488	1.23588	1.04204	1.07782	1.08422	1.00714		1.0755	1.15837	1.11898	1.18084	1.17695	1.2946	1.42018	1.69234	1.00343	1.35995		1.06066	1.06587	1.11899	1.19715	1.01947	1.17667	1.05548	1.06404	1.01415	1.05513		1.1668	1.07107	1.26656	1.15394	1.10274	1.00661	1.21182	1.06281	1.04989	1.11282		1.0551	1.00834	1.30836	1.06028	1.0406	1.0452
1.04668	1.04294	1.07915	1.20766	1.00796	1.22318	1.06607	1.06898	1.06617	1.00501		1.0746	1.15633	1.11784	1.17811	1.1517	1.28723	1.43184	1.69892	1.00326	1.36497		1.16486	1.07065	1.12427	1.17855	1.02177	1.04075	1.0876	1.06689	1.01621	1.04111		1.16031	1.05665	1.26344	1.15786	1.11101	1.00848	1.17593	1.05419	1.06361	1.09967		1.08725	1	1.29438	1.07613	1.04785	1.03055
1.05322	1.0408	1.06451	1.25016	1.00828	1.25205	1.04009	1.06764	1.06083	1.00305		1.07948	1.15655	1.11094	1.17627	1.17884	1.28723	1.40843	1.6861	1.00657	1.36401		1.20943	1.07195	1.14098	1.15477	1.04993	1.15306	1.05886	1.06312	1.02209	1.03847		1.15425	1.04952	1.25877	1.14898	1.09136	1.0078	1.16142	1.03253	1.09488	1.10076		1.10642	1.01476	1.29496	1.05454	1.02905	1.03368
1.05501	1.04653	1.07919	1.21605	1.16577	1.21594	1.03487	1.06273	1.07645	1.00657		1.07829	1.15823	1.10693	1.17558	1.17097	1.28622	1.4331	1.70501	1.00829	1.35969		1.30517	1.06693	1.14174	1.15602	1.06063	1.16834	1.07051	1.05513	1.01691	1.06862		1.15992	1.0518	1.26984	1.14771	1.08681	1.00954	1.17319	1.05148	1.06425	1.05118		1.04168	1.00693	1.27743	1.05471	1.04523	1.03121
1.03994	1.03322	1.08549	1.24473	1.1522	1.23889	1.05222	1.06841	1.07228	1.0111		1.07723	1.15841	1.09892	1.17633	1.18467	1.28194	1.44208	1.70405	1.00527	1.36253		1.28266	1.07009	1.14535	1.14569	1.01817	1.07893	1.06829	1.04394	1.01494	1.05434		1.15815	1.05203	1.26492	1.14702	1.08329	1.00812	1.16487	1.05624	1.06239	1.09716		1.10252	1.01537	1.28322	1.04568	1.02969	1.02412
1.04864	1.05954	1.07424	1.21561	1.1418	1.23092	1.0447	1.07618	1.081	1.01181		1.07895	1.15857	1.10195	1.1739	1.18194	1.27631	1.42799	1.72353	1.00499	1.35744		1.09825	1.07208	1.1559	1.11275	1.06954	1.1228	1.09033	1.03432	1.01853	1.0634		1.14347	1.05504	1.27304	1.15107	1.09312	1.01752	1.21132	1.05212	1.10887	1.11218		1.06184	1.01498	1.27212	1.03113	1.02977	1.03089
1.0422	1.02982	1.07895	1.22588	1.16567	1.22437	1.04584	1.07231	1.0802	1.00307		1.07686	1.14962	1.10246	1.17405	1.17084	1.26672	1.42341	1.72013	1.00851	1.37763		1.20111	1.05503	1.17865	1.10381	1.02993	1.13475	1.05093	1.04434	1.02529	1.08171		1.14134	1.04256	1.2652	1.16088	1.10667	1.01032	1.1716	1.04823	1.09384	1.14238		1.03339	1.01228	1.26331	1.02684	1.04916	1.02888
1.05034	1.05997	1.0928	1.2411	1.1545	1.24726	1.05138	1.06655	1.06271	1.00261		1.08206	1.16355	1.09834	1.17231	1.16555	1.26923	1.42864	1.74585	1.01015	1.37633		1.17393	1.06076	1.18509	1.07467	1.03665	1.12496	1.06516	1.05494	1.02837	1.08376		1.13996	1.02867	1.27526	1.1646	1.08702	1.01046	1.18999	1.04971	1.10178	1.14781		1.02125	1.02182	1.27026	1.07364	1.04754	1.03031
1.04421	1.02065	1.08604	1.21593	1.04681	1.24971	1.02936	1.0698	1.08822	1.0017		1.08314	1.16298	1.09654	1.17413	1.15289	1.26533	1.43605	1.7093	1.00986	1.37898		1.33079	1.05446	1.17986	1.08036	1.00323	1.13491	1.06603	1.04528	1.02491	1.09999		1.14454	1.03481	1.26278	1.17	1.11051	1.01277	1.15449	1.05825	1.12072	1.16028		1.09177	1.01419	1.26801	1.06524	1.03323	1.03279
1.05483	1.0064	1.07448	1.24545	1.15733	1.25882	1.0507	1.06729	1.03923	1.00786		1.08402	1.14299	1.10221	1.17663	1.16675	1.26328	1.4479	1.73268	1.00805	1.37912		1.25199	1.04797	1.16252	1.08933	1.05687	1.14861	1.04831	1.04295	1.01985	1.11435		1.14532	1.03789	1.26599	1.16387	1.08974	1.01313	1.19756	1.0346	1.11064	1.16128		1.08142	1.02122	1.25884	1.06945	1.04885	1.03507
1.03735	1.03747	1.07308	1.23082	1.06946	1.23561	1.0315	1.07075	1.06373	1.0063		1.08265	1.15493	1.10286	1.18	1.16113	1.25886	1.45305	1.72413	1.01137	1.38382		1.28174	1.05003	1.155	1.09985	1.01705	1.14847	1.09228	1.05389	1.02637	1.10921		1.15021	1.05554	1.25831	1.16605	1.09359	1.01841	1.20251	1.04791	1.09728	1.17099		1.07801	1.00628	1.25071	1.04359	1.05029	1.04065
1.04079	1.02536	1.0798	1.26263	1.13482	1.24963	1.0145	1.06732	1.05609	1.00074		1.08268	1.15795	1.10091	1.18072	1.15919	1.25952	1.41249	1.73493	1.00902	1.38203		1.17798	1.05082	1.15513	1.09411	1.0105	1.11652	1.0817	1.04441	1.03182	1.12746		1.14866	1.05824	1.26563	1.15733	1.10835	1.02076	1.22062	1.04495	1.12126	1.17352		1.0813	1.01296	1.24836	1.10535	1.05187	1.03906
1.04899	1.03335	1.08146	1.24219	1.0254	1.23987	1.03455	1.07399	1.05429	1.00201		1.08312	1.16298	1.09879	1.17965	1.16985	1.2584	1.45451	1.73883	1.00937	1.37917		1.06092	1.04832	1.13444	1.09036	1.0525	1.11596	1.08653	1.02425	1.03524	1.099		1.14947	1.05324	1.27523	1.15917	1.11825	1.02266	1.1778	1.04536	1.11247	1.17742		1.07869	1.01815	1.25326	1.0683	1.02593	1.03557
1.05951	1.03026	1.08953	1.22981	1.13572	1.23297	1.04182	1.06832	1.08479	1.00402		1.08035	1.17555	1.09845	1.17791	1.18611	1.25097	1.45899	1.74496	1.01158	1.36871		1.07267	1.03988	1.14533	1.10255	1.05974	1.07936	1.09284	1.03878	1.02857	1.08745		1.1488	1.05248	1.26412	1.1551	1.10451	1.01494	1.1736	1.0532	1.15394	1.15984		1.0565	1.01734	1.23526	1.06463	1.05745	1.04045
1.04721	1.06678	1.07247	1.23241	1.12931	1.27021	1.04136	1.07408	1.08407	1.00492		1.08354	1.17293	1.09895	1.17439	1.17504	1.24822	1.48283	1.71588	1.01151	1.37191		1.10146	1.04623	1.20173	1.11649	1.02045	1.1469	1.06829	1.00891	1.02994	1.08807		1.1455	1.05769	1.27382	1.1521	1.10708	1.01324	1.18291	1.04448	1.14997	1.15044		1.08671	1.01781	1.24758	1.07275	1.04113	1.03298
1.03796	1.03408	1.07882	1.23849	1.08105	1.25384	1.03478	1.0742	1.07581	1.00427		1.08496	1.16229	1.09671	1.17541	1.17204	1.24587	1.44397	1.73498	1.00983	1.38147		1.18673	1.03645	1.17817	1.11568	1.02831	1.09014	1.09025	1.01423	1.02987	1.08932		1.14632	1.04325	1.25887	1.14682	1.10672	1.01766	1.15787	1.0413	1.12995	1.15011		1.11739	1.01349	1.24726	1.071	1.05093	1.03978
1.0489	1.04034	1.09132	1.2383	1.09339	1.26454	1.0408	1.06429	1.08306	1.00027		1.08386	1.14868	1.09704	1.17639	1.18465	1.23861	1.46293	1.73578	1.00693	1.39135		1.18352	1.04174	1.16414	1.11537	1.04162	1.07879	1.06804	1.04013	1.03266	1.08532		1.14686	1.04164	1.2649	1.16537	1.10041	1.01658	1.17961	1.03929	1.14694	1.14978		1.08983	1.01867	1.2371	1.01362	1.05634	1.02837
1.04934	1.02862	1.08389	1.25019	1.08165	1.22741	1.043	1.05859	1.0576	1.00383		1.08648	1.15793	1.09777	1.18007	1.18758	1.23727	1.45225	1.7457	1.0055	1.3922		1.36837	1.03722	1.14414	1.11515	1.02207	1.08423	1.07589	1.00413	1.03227	1.08649		1.14549	1.04936	1.26836	1.16371	1.11755	1.01441	1.15336	1.0494	1.06006	1.14391		1.05543	1.01619	1.24637	1.06827	1.05135	1.02148
1.03818	1.01853	1.08932	1.24114	1.02863	1.22586	1.03531	1.05549	1.07423	1.00463		1.08371	1.15778	1.09757	1.17465	1.18472	1.23867	1.4643	1.72251	1.00541	1.39035		1.26029	1.02608	1.1462	1.10231	1.03609	1.08729	1.07042	1.05202	1.02929	1.09636		1.14081	1.07327	1.26397	1.16	1.1062	1.01655	1.17557	1.04583	1.14097	1.1206		1.06981	1.01372	1.24633	1.04817	1.06908	1.02636
1.04267	1.02214	1.0791	1.24085	1.06614	1.23948	1.01091	1.05167	1.06341	1.00028		1.08587	1.17576	1.09587	1.17092	1.1811	1.23717	1.43015	1.74378	1.00676	1.39837		1.09515	1.04111	1.16306	1.08863	1.02747	1.10202	1.05834	1.03031	1.03425	1.07395		1.14482	1.08742	1.27618	1.13597	1.11329	1.02026	1.19416	1.04852	1.15069	1.12739		1.05729	1.01799	1.22965	1.06524	1.06178	1.02858
1.04846	1.04836	1.08965	1.25705	1.1654	1.27146	1.01735	1.05425	1.07104	1		1.08251	1.16267	1.09515	1.17447	1.16742	1.2309	1.45791	1.71969	1.00869	1.39741		1.17388	1.04054	1.13044	1.09766	1.03339	1.09625	1.08468	1.04215	1.02776	1.05839		1.15498	1.09342	1.26931	1.12756	1.0778	1.01719	1.17659	1.04802	1.13986	1.16139		1.08806	1.02612	1.24338	1.05737	1.04638	1.02083
1.03953	1.04685	1.08241	1.2392	1.15353	1.26561	1.0187	1.05849	1.05272	1.0017		1.07555	1.16163	1.09783	1.17314	1.1971	1.23405	1.42324	1.75624	1.00494	1.40259		1.26977	1.03397	1.14669	1.11974	1.04318	1.07802	1.04306	1.01864	1.02966	1.06968		1.15982	1.08622	1.26277	1.11954	1.08466	1.02344	1.17845	1.04537	1.13051	1.17322		1.05207	1.01545	1.22336	1.05211	1.05667	1.02019
1.04494	1.05125	1.08178	1.25444	1.12128	1.2722	1.01617	1.07127	1.06691	1.00459		1.07591	1.15977	1.09191	1.17041	1.16688	1.23222	1.45979	1.75133	1.007	1.40879		1.2356	1.02049	1.15091	1.10901	1.05831	1.0355	1.05852	1	1.03361	1.06253		1.16502	1.08539	1.26998	1.13273	1.08296	1.01548	1.179	1.04327	1.13262	1.17955		1.07208	1.02324	1.23256	1.02054	1.03923	1.01917
1.04953	1.02939	1.10096	1.26041	1.16161	1.24809	1.03955	1.05217	1.04011	1.00943		1.07722	1.16689	1.09394	1.17281	1.16597	1.22915	1.45339	1.73103	1.00711	1.40732		1.2788	1.02076	1.12982	1.105	1.01703	1.09828	1.06881	1.02258	1.03359	1.07117		1.15576	1.09431	1.25652	1.11772	1.09936	1.01494	1.16277	1.05132	1.13085	1.20339		1.10858	1.02526	1.23077	1.05388	1.03747	1.01704
1.05347	1.05553	1.06502	1.24088	1.15843	1.24967	1.02673	1.05588	1.0683	1.00629		1.07361	1.18037	1.09502	1.1739	1.17778	1.22739	1.40452	1.73575	1.01271	1.4036		1.13025	1.02888	1.11522	1.11139	1.03078	1.16819	1.05703	1.02642	1.03747	1.07085		1.15818	1.08641	1.26962	1.11614	1.10669	1.02288	1.17968	1.04514	1.11568	1.214		1.02538	1.03307	1.2238	1.04999	1.04442	1.00947
1.05136	1.07672	1.05196	1.26763	1.14104	1.28196	1.06455	1.0612	1.04127	1.01046		1.075	1.18078	1.09687	1.17194	1.18743	1.2203	1.43635	1.72768	1.00722	1.40841		1.25935	1.0233	1.12453	1.10962	1.06071	1.09575	1.05506	1.02781	1.03745	1.05184		1.1647	1.07391	1.26061	1.11755	1.10165	1.02205	1.16946	1.05456	1.12495	1.23681		1.10808	1.01914	1.2299	1.04375	1.05207	1.0171
1.04727	1.02302	1.07786	1.26851	1.04876	1.26971	1.05709	1.06794	1.06238	1.01496		1.07353	1.17196	1.09519	1.17505	1.18153	1.22351	1.45098	1.71746	1.00687	1.41128		1.26024	1.02126	1.16765	1.09917	1.00795	1.08412	1.09345	1.01103	1.03115	1.04639		1.1668	1.08241	1.26791	1.10105	1.0815	1.01909	1.16655	1.04505	1.13507	1.26025		1.08501	1.02412	1.23528	1.02124	1.06	1.01707
1.04906	1.03602	1.07818	1.24442	1.01848	1.26969	1.05129	1.06152	1.05737	1.01189		1.07959	1.1919	1.09462	1.1791	1.17835	1.22495	1.44836	1.72941	1.0077	1.40188		1.15698	1.02035	1.14979	1.11741	1.04081	1.10538	1.05986	1.03587	1.0352	1.04995		1.16099	1.05953	1.26872	1.09205	1.08044	1.02635	1.16738	1.04619	1.11317	1.23791		1.12569	1.02958	1.23301	1.07344	1.0436	1.01343
1.05002	1.03827	1.08978	1.29178	1.10634	1.29971	1.03611	1.0637	1.02976	1.00832		1.08409	1.17757	1.08975	1.17699	1.19394	1.21835	1.44497	1.7347	1.00681	1.41131		1.35791	1.01904	1.15695	1.10805	1.05827	1.15329	1.08986	1.0235	1.03483	1.07097		1.16681	1.05442	1.26212	1.08427	1.08505	1.01717	1.20444	1.04657	1.12452	1.18795		1.07794	1.02155	1.22022	1.05661	1.06514	1.00941
1.03356	1.03581	1.07917	1.27353	1.06008	1.28667	1.05164	1.06445	1.04901	1.01794		1.0881	1.19116	1.09232	1.17363	1.20251	1.20983	1.4426	1.72039	1.01366	1.41001		1.25782	1.02832	1.15666	1.09383	1.02673	1.13498	1.06123	1.04564	1.03373	1.05336		1.15748	1.06693	1.26291	1.04866	1.09234	1.02221	1.14415	1.04879	1.13795	1.17096		1.04473	1.03613	1.2138	1.06758	1.07065	1.00742
1.04549	1.06074	1.08826	1.28257	1.14772	1.25262	1.03123	1.07142	1.04419	1.01493		1.09214	1.18418	1.09123	1.17551	1.19232	1.21279	1.44497	1.71142	1.01476	1.41007		1.30133	1.02267	1.14236	1.09531	1.05748	1.16749	1.07789	1.035	1.0393	1.08396		1.15108	1.06085	1.26706	1.06887	1.09544	1.01458	1.17201	1.04529	1.11684	1.13266		1.11987	1.02842	1.19645	1.02994	1.07765	1.01033
1.05426	1.01511	1.0835	1.27925	1.14462	1.27101	1.0291	1.07051	1.05025	1.01419		1.08826	1.20088	1.08593	1.17516	1.18239	1.21393	1.46736	1.7284	1.01499	1.41022		1.18951	1.02977	1.11615	1.09745	1.05663	1.14888	1.08109	1.0172	1.03486	1.06161		1.14316	1.04632	1.2615	1.05229	1.09052	1.01308	1.15676	1.04128	1.10509	1.09818		1.10701	1.02364	1.20847	1.06332	1.06422	1.00392
1.05335	1.04973	1.08026	1.25766	1.1445	1.29192	1.02401	1.05824	1.03371	1.01778		1.08722	1.19939	1.08475	1.17097	1.20292	1.21066	1.44728	1.74029	1.01547	1.41166		1.09739	1.0157	1.13132	1.08058	1.01053	1.06677	1.06864	1.0178	1.02968	1.07048		1.14669	1.05158	1.25946	1.04436	1.08691	1.01198	1.17301	1.04462	1.10803	1.10695		1.05048	1.02747	1.20914	1.07218	1.07966	1.00134
1.04836	1.04734	1.08881	1.26708	1.13148	1.26667	1.05739	1.06258	1.04821	1.01589		1.08479	1.19711	1.08798	1.1724	1.18674	1.21673	1.4467	1.74125	1.0153	1.41455		1.09543	1.0155	1.12401	1.07689	1.03472	1.10844	1.08657	1.02113	1.04353	1.07561		1.14662	1.04041	1.26338	1.04536	1.08507	1.01582	1.16677	1.05369	1.14884	1.09642		1.12655	1.03887	1.19931	1.05776	1.04733	1
1.04753	1.06965	1.08451	1.25758	1.07364	1.30746	1.04094	1.06008	1.02504	1.01352		1.08221	1.19707	1.08932	1.17254	1.17546	1.20792	1.45137	1.71961	1.01573	1.41252		1.32518	1.01696	1.08926	1.06733	1.05363	1.11847	1.07793	1.03579	1.04032	1.07474		1.1443	1.07668	1.25758	1.05446	1.08483	1.01567	1.17857	1.03828	1.1303	1.10027		1.10169	1.0225	1.21287	1.0488	1.08097	1.00326
1.04991	1.04439	1.07106	1.26407	1.00076	1.29912	1.05474	1.06509	1.04369	1.01063		1.08217	1.18853	1.08291	1.17006	1.20916	1.20479	1.4553	1.7297	1.01463	1.41578		1.31359	1.01236	1.09931	1.05613	1.02097	1.11809	1.09373	1.00848	1.04363	1.06087		1.14117	1.08444	1.26591	1.05321	1.0598	1.01659	1.1939	1.0417	1.14447	1.08793		1.08543	1.03896	1.19749	1.04088	1.07597	1.00365
1.052	1.09323	1.09111	1.27022	1.09543	1.28833	1.06266	1.06125	1.02594	1.01584		1.08278	1.19409	1.08419	1.16737	1.1638	1.20583	1.46563	1.74372	1.01586	1.41189		1.34361	1.01797	1.11795	1.04716	1.05208	1.10693	1.07564	1.02249	1.04452	1.07094		1.14637	1.0544	1.25962	1.0438	1.02346	1.01055	1.14661	1.03905	1.10807	1.0847		1.06533	1.0247	1.1885	1.06599	1.05519	1.00261
1.04252	1.05145	1.09433	1.25297	1.00179	1.30039	1.05981	1.05614	1.04621	1.01534		1.08181	1.18798	1.07789	1.17044	1.19086	1.19929	1.42811	1.74628	1.01646	1.41335		1.33483	1.01377	1.11441	1.03892	1.04878	1.13155	1.08076	1.02162	1.04774	1.05684		1.14204	1.0447	1.25847	1.03192	1.03392	1.0147	1.15849	1.04503	1.14147	1.05948		1.10966	1.03796	1.20148	1.05141	1.05387	1.00107
1.05078	1.07662	1.08389	1.24648	1.16679	1.27737	1.05947	1.06729	1.04208	1.02051		1.0828	1.19561	1.07795	1.16868	1.18872	1.20329	1.42903	1.71688	1.01605	1.41262		1.23294	1.01484	1.10335	1.02574	1.0689	1.08932	1.0947	1.01087	1.04516	1.05651		1.14225	1.03799	1.26382	1.02629	1.03545	1.01213	1.15712	1.04577	1.11936	1.06723		1.07732	1.04413	1.19196	1.04144	1.04796	1.00438
1.05106	1.07231	1.08814	1.21652	1.10952	1.26351	1.06981	1.0668	1.03373	1.01944		1.08631	1.21586	1.07607	1.16538	1.19006	1.20978	1.46525	1.75078	1.01425	1.42056		1.06849	1.00414	1.09749	1.0274	1.05471	1.14233	1.08756	1.02235	1.05102	1.06063		1.15364	1.05454	1.25478	1.02458	1.00948	1.00953	1.16065	1.04593	1.13212	1.06668		1.14649	1.0293	1.20548	1.07886	1.07088	1.00795
1.03434	1.05831	1.09612	1.21925	1.09386	1.28454	1.06409	1.07461	1.0525	1.02277		1.08858	1.20488	1.07826	1.16708	1.17327	1.20866	1.46661	1.71351	1.01469	1.42143		1.19965	1.01729	1.06981	1.02849	1.03587	1.06908	1.08127	1.00365	1.05809	1.05144		1.14478	1.04508	1.26187	1.01956	1.0278	1.01364	1.15555	1.04657	1.14681	1.08177		1.06944	1.03731	1.20058	1.05741	1.0923	1.00445
1.05075	1.07151	1.082	1.23696	1.13753	1.27696	1.03882	1.07017	1.02421	1.01587		1.08479	1.22293	1.07752	1.16753	1.17006	1.20431	1.50122	1.73723	1.01337	1.41861		1.18063	1.0059	1.07048	1.01796	1.07042	1.15708	1.08261	1.0386	1.06083	1.05382		1.14738	1.04075	1.26665	1.01135	1.02837	1.00886	1.17854	1.04567	1.14452	1.05987		1.10709	1.03761	1.21189	1.0346	1.08236	1.01412
1.05212	1.08169	1.09486	1.19501	1.16924	1.29067	1.06788	1.06666	1.02773	1.0215		1.07998	1.21076	1.08139	1.16647	1.17916	1.19936	1.47979	1.74764	1.01818	1.4186		1.23065	1.00512	1.04956	1.009	1.0728	1.14068	1.0816	1.01757	1.06817	1.0492		1.14456	1.03059	1.26055	1.02027	1.02705	1.00549	1.1413	1.05113	1.13669	1.05392		1.11979	1.03103	1.20471	1.07359	1.07377	1.01715
1.05746	1.07575	1.09648	1.20042	1.16543	1.30857	1.02828	1.06291	1.03673	1.02277		1.08132	1.2092	1.07287	1.16703	1.19911	1.20198	1.47198	1.73033	1.01642	1.41766		1.28331	1.01372	1.03266	1.00596	1.03922	1.12707	1.08633	1.00793	1.06177	1.05846		1.14525	1.03111	1.26117	1.0086	1.01304	1.01204	1.1683	1.04841	1.1382	1.11059		1.08464	1.04492	1.19999	1.05966	1.09816	1.01336
1.04269	1.05074	1.09278	1.19182	1.16369	1.31907	1.04397	1.07786	1.05686	1.02807		1.08165	1.20468	1.07145	1.17346	1.17239	1.19968	1.48744	1.73077	1.01561	1.4145		1.12501	1.00727	1.03014	1	1.06851	1.08923	1.09133	1.02501	1.0656	1.03714		1.14914	1.03781	1.27367	1.01293	1.01391	1.01069	1.17083	1.04717	1.153	1.06819		1.0633	1.03595	1.20525	1.11703	1.07938	1.0084
1.04395	1.0869	1.07881	1.20734	1.13382	1.30291	1.04953	1.05747	1.04666	1.03812		1.0804	1.2127	1.06809	1.17168	1.17141	1.2006	1.49909	1.7487	1.01365	1.4133		1.22557	1.00837	1.04977	1.02262	1.03455	1.13504	1.0932	1.01371	1.07347	1.0364		1.14712	1.03909	1.25895	1.00961	1.0229	1.01788	1.16229	1.05099	1.14582	1.12482		1.0716	1.04365	1.21293	1.07893	1.07726	1.01556
1.05904	1.08648	1.09903	1.18115	1.07169	1.33614	1.06765	1.0577	1.0569	1.03679		1.08276	1.22069	1.06878	1.17021	1.18052	1.20427	1.50578	1.73157	1.01172	1.41521		1.26692	1.00701	1.04057	1.03485	1.05836	1.23877	1.09966	1.02064	1.0837	1.04053		1.14327	1.02605	1.26829	1	1.02334	1.0167	1.18393	1.04888	1.13749	1.15247		1.06007	1.0505	1.21253	1.07329	1.05676	1.01309
1.06258	1.06336	1.08664	1.16185	1.04323	1.32576	1.05126	1.06617	1.04554	1.03485		1.08342	1.21765	1.06347	1.16903	1.17583	1.2014	1.47126	1.76508	1.0136	1.41196		1.16691	1.0173	1.03778	1.02788	1.03879	1.15224	1.09714	1.0259	1.08462	1.05905		1.14009	1.01255	1.26402	1.01589	1.01574	1.01398	1.16777	1.03694	1.12569	1.14562		1.15841	1.05045	1.18636	1.06272	1.06792	1.01542
1.07106	1.07069	1.09791	1.17883	1.11486	1.33629	1.05328	1.06936	1.04131	1.02843		1.08554	1.21812	1.06273	1.16837	1.17589	1.20513	1.48892	1.72728	1.01741	1.41041		1.21719	1.01107	1.03489	1.03911	1.07749	1.08778	1.09082	1.02931	1.09147	1.05503		1.14482	1	1.26548	1.02297	1.009	1.01501	1.18265	1.04042	1.14765	1.12247		1.13796	1.04099	1.20433	1.06525	1.07949	1.0176
1.07084	1.0695	1.09178	1.15837	1.12397	1.29193	1.03825	1.05986	1.04657	1.03089		1.08618	1.21946	1.06069	1.16641	1.20025	1.20712	1.48977	1.71307	1.0144	1.40756		1.31298	1.01967	1.03139	1.02738	1.06613	1.16801	1.07784	1.02246	1.09302	1.04755		1.1514	1.0013	1.2681	1.01404	1	1.01373	1.17896	1.04625	1.14441	1.13946		1.12727	1.04951	1.18997	1.08019	1.08995	1.01446
1.06788	1.06316	1.06344	1.15729	1.08895	1.32333	1.08022	1.05173	1.03724	1.03176		1.08404	1.22959	1.05729	1.16581	1.17059	1.20578	1.51879	1.74376	1.01609	1.40582		1.25229	1.00306	1.04893	1.03909	1.05285	1.12147	1.09549	1.03765	1.09926	1.06312		1.1469	1.03235	1.27381	1.02052	1.00435	1.01393	1.16566	1.04777	1.13626	1.13465		1.12847	1.04726	1.20661	1.08052	1.07847	1.01577
1.07944	1.10065	1.07241	1.13116	1.17281	1.29409	1.05691	1.05618	1.06175	1.02383		1.08569	1.2316	1.05168	1.16507	1.2075	1.20881	1.50299	1.72132	1.01554	1.41325		1.33521	1	1.05192	1.03843	1.07731	1.09068	1.08327	1.01582	1.10567	1.06681		1.14834	1.05348	1.26904	1.0366	1.02123	1.01187	1.16458	1.04412	1.14145	1.11242		1.06766	1.05978	1.20764	1.09185	1.08486	1.01094
1.07737	1.07273	1.0778	1.13693	1.10401	1.33257	1.08649	1.05301	1.06671	1.03275		1.09407	1.23633	1.05288	1.1668	1.18328	1.21113	1.53189	1.74312	1.01709	1.41922		1.4302	1.00773	1.06596	1.04664	1.05017	1.08935	1.08015	1.04637	1.11237	1.06222		1.14994	1.05656	1.26505	1.04259	1.05335	1.01402	1.1716	1.02995	1.17511	1.13393		1.0879	1.05563	1.20122	1.08366	1.10026	1.00488
1.07646	1.11465	1.07755	1.1263	1.14724	1.32348	1.09776	1.04293	1.05071	1.02707		1.084	1.22927	1.05016	1.16657	1.20891	1.20875	1.4834	1.72998	1.0179	1.42199		1.29209	1.01243	1.06855	1.05596	1.09652	1.08645	1.09223	1.016	1.11098	1.06629		1.14424	1.05635	1.26773	1.03206	1.05818	1.00947	1.16797	1.04433	1.15662	1.09957		1.13716	1.06625	1.1563	1.07295	1.11276	1.01444
1.0721	1.0695	1.06292	1.1065	1.20328	1.32542	1.08425	1.04404	1.05037	1.04338		1.0828	1.23038	1.04019	1.16734	1.2046	1.2021	1.4801	1.74585	1.01903	1.41984		1.22845	1.00306	1.07085	1.0696	1.08361	1.11544	1.08125	1.00884	1.11199	1.0726		1.13798	1.04498	1.26807	1.03375	1.05729	1.01648	1.18519	1.04759	1.16726	1.13079		1.09991	1.06783	1.16666	1.08841	1.1049	1.01665
1.07601	1.08003	1.06085	1.11841	1.18141	1.32376	1.08975	1.04695	1.06106	1.03675		1.0837	1.22463	1.03718	1.1688	1.2164	1.20178	1.4836	1.75915	1.01596	1.41854		1.17885	1.00031	1.03863	1.07479	1.09485	1.14919	1.09223	1.02731	1.12384	1.06238		1.14103	1.04461	1.26971	1.03802	1.06668	1.01051	1.17627	1.051	1.13881	1.12909		1.10446	1.06227	1.18196	1.0559	1.09854	1.01394
1.07573	1.09152	1.04715	1.09575	1.21721	1.36166	1.06917	1.04032	1.05376	1.04592		1.07786	1.22252	1.03422	1.16948	1.20265	1.20641	1.46869	1.72424	1.0128	1.42239		1.14098	1.00058	1.02314	1.09557	1.05424	1.09149	1.08533	1.01765	1.12514	1.07213		1.13676	1.046	1.26683	1.0507	1.08156	1.01462	1.13557	1.03535	1.15695	1.11129		1.17521	1.05486	1.19374	1.07445	1.10069	1.01768
1.07851	1.07416	1.06428	1.0989	1.18667	1.3563	1.06416	1.03797	1.06443	1.04703		1.09006	1.25187	1.02456	1.16958	1.20473	1.20918	1.48229	1.74256	1.01446	1.4274		1.28708	1.01621	1	1.09351	1.10171	1.10285	1.09315	1.03046	1.12602	1.0732		1.14332	1.05529	1.26609	1.03668	1.08943	1.0139	1.18872	1.0451	1.15447	1.10547		1.1153	1.06799	1.21293	1.06722	1.10956	1.02343
1.07936	1.1019	1.06176	1.07438	1.14123	1.35505	1.10027	1.02426	1.03658	1.05284		1.08578	1.24256	1.02665	1.16839	1.20316	1.20911	1.49492	1.72618	1.01595	1.42821		1.29443	1.01208	1.0049	1.10812	1.09022	1.13051	1.10288	1.03691	1.13527	1.07356		1.14935	1.05262	1.26109	1.03307	1.09543	1.0212	1.15952	1.04728	1.19289	1.12626		1.12074	1.06251	1.21261	1.09769	1.09251	1.02652
1.0829	1.10707	1.04466	1.07819	1.09423	1.36994	1.08346	1.0191	1.05036	1.04512		1.08418	1.23754	1.01863	1.16557	1.20656	1.20843	1.50831	1.73218	1.01747	1.4301		1.23744	1.02072	1.032	1.11075	1.07179	1.09424	1.09084	1.0285	1.13868	1.07036		1.14604	1.06783	1.27579	1.03843	1.10589	1.01138	1.18867	1.05481	1.18982	1.12934		1.11703	1.07234	1.19754	1.07024	1.10205	1.02144
1.08723	1.09638	1.05237	1.05765	1.20991	1.35899	1.0905	1.02012	1.05784	1.05182		1.08102	1.24611	1.02147	1.16632	1.1971	1.2096	1.50707	1.73563	1.01412	1.43018		1.25689	1.02787	1.07225	1.12109	1.07252	1.04177	1.09034	1.0591	1.14283	1.08399		1.15385	1.08547	1.2768	1.03362	1.08473	1.0167	1.17945	1.0493	1.20375	1.12901		1.14411	1.05976	1.20916	1.1119	1.10868	1.03099
1.09341	1.11094	1.04888	1.04964	1.19412	1.3443	1.11679	1.03266	1.05276	1.05452		1.07452	1.25397	1.01731	1.16847	1.19641	1.21803	1.51439	1.77513	1.02039	1.42683		1.31374	1.02559	1.07291	1.1073	1.06815	1.12292	1.09408	1.03912	1.14893	1.07065		1.14035	1.11636	1.26734	1.02758	1.11431	1.0196	1.18413	1.04912	1.25242	1.10986		1.05508	1.06804	1.21271	1.11252	1.10836	1.03486
1.10222	1.09986	1.04669	1.03945	1.17121	1.39409	1.08605	1.04017	1.07134	1.0587		1.0758	1.25165	1.00875	1.16692	1.20132	1.21996	1.51279	1.75508	1.01454	1.43049		1.24485	1.01239	1.07427	1.10485	1.10024	1.11657	1.09099	1.04194	1.14555	1.06396		1.15208	1.10406	1.27639	1.03783	1.10507	1.02876	1.17842	1.06033	1.27979	1.1115		1.10461	1.08068	1.21532	1.09334	1.11962	1.02848
1.10735	1.10024	1.03705	1.02653	1.1084	1.34391	1.1038	1.03283	1.04813	1.05784		1.06904	1.25323	1.00668	1.16766	1.21324	1.21866	1.50876	1.74693	1.01643	1.42711		1.23789	1.01304	1.07147	1.10273	1.12077	1.00884	1.09959	1.0473	1.14837	1.07028		1.15533	1.09907	1.27109	1.04211	1.17087	1.02741	1.18035	1.05894	1.35517	1.11831		1.11025	1.089	1.23527	1.0788	1.10083	1.03192
1.10191	1.10607	1.05435	1.03658	1.12003	1.41011	1.0805	1.02533	1.07751	1.06481		1.0625	1.25031	1.00336	1.16769	1.21362	1.22286	1.54427	1.75958	1.01929	1.41655		1.29809	1.01557	1.06726	1.11101	1.09343	1	1.10713	1.04186	1.15425	1.0709		1.15738	1.09697	1.27689	1.03401	1.19019	1.02736	1.19654	1.05207	1.6436	1.11389		1.15871	1.08765	1.22433	1.11142	1.08619	1.03807
1.10754	1.12408	1.03682	1.04135	1.11554	1.37151	1.10342	1.0244	1.07846	1.06475		1.06499	1.25359	1.00565	1.16627	1.18845	1.22067	1.55235	1.7748	1.01807	1.4271		1.27393	1.02188	1.0639	1.10605	1.09643	1.05096	1.1244	1.03908	1.1559	1.10071		1.16275	1.10667	1.27747	1.04659	1.19202	1.03112	1.18269	1.06039	1.55028	1.10613		1.10022	1.07942	1.23807	1.08206	1.10414	1.0389
1.10117	1.09078	1.0489	1.01931	1.16179	1.39216	1.10518	1.02927	1.04309	1.07499		1.0577	1.25101	1.0043	1.1669	1.18812	1.22363	1.53136	1.74224	1.01528	1.42621		1.16722	1.02491	1.07735	1.093	1.10138	1.04347	1.11383	1.05725	1.158	1.09283		1.15959	1.1014	1.28664	1.05067	1.16871	1.02054	1.1955	1.04422	1.66281	1.06755		1.1599	1.08087	1.2312	1.10824	1.10659	1.04419
1.09949	1.07296	1.04544	1.03041	1.15782	1.36752	1.11747	1.02603	1.06458	1.07878		1.05604	1.26475	1.00126	1.16566	1.191	1.21937	1.54334	1.74435	1.01421	1.4195		1.249	1.02268	1.07191	1.10658	1.12597	1.07149	1.1254	1.06302	1.15895	1.09975		1.15241	1.08732	1.28044	1.05862	1.19808	1.02538	1.13603	1.03265	1.63923	1.1071		1.08186	1.10064	1.23565	1.11741	1.09944	1.04334
1.10829	1.11701	1.05949	1.03587	1.13973	1.35941	1.11545	1.02003	1.07962	1.07193		1.05908	1.25825	1.00097	1.16557	1.20257	1.22107	1.52443	1.77045	1.01604	1.42436		1.18256	1.01065	1.06101	1.13422	1.12482	1.02347	1.12318	1.08476	1.16301	1.07688		1.14697	1.08876	1.27748	1.06843	1.20256	1.02561	1.15562	1.03019	1.46104	1.11485		1.11331	1.09449	1.24234	1.11978	1.10735	1.05154
1.111	1.10905	1.04329	1.02108	1.23146	1.35813	1.11055	1.02237	1.09691	1.07041		1.05749	1.26551	1	1.16499	1.19884	1.22169	1.54663	1.74164	1.01684	1.4195		1.25312	1.00761	1.05816	1.14883	1.087	1.10332	1.12341	1.05379	1.16043	1.10782		1.15079	1.09115	1.28211	1.07204	1.18977	1.02469	1.15158	1.02965	1.27426	1.11582		1.17555	1.10066	1.23242	1.05806	1.12807	1.05495
1.11286	1.14211	1.04315	1.02554	1.22917	1.41132	1.12278	1.02734	1.07656	1.08214		1.05382	1.26041	1.00119	1.16244	1.19578	1.21728	1.57499	1.73712	1.01167	1.41835		1.42447	1.01284	1.06824	1.16504	1.15163	1.05456	1.11809	1.07237	1.16302	1.10115		1.14695	1.10278	1.27557	1.07424	1.16149	1.01653	1.16031	1.02188	1.26332	1.13382		1.17469	1.09335	1.24573	1.12565	1.13825	1.05207
1.116	1.12262	1.07645	1.02313	1.18727	1.40826	1.1074	1.0362	1.0927	1.08623		1.05365	1.25756	1.00857	1.16339	1.21642	1.22024	1.56948	1.77453	1.0086	1.41385		1.25362	1.01142	1.07375	1.1805	1.14038	1.06946	1.14114	1.05396	1.15902	1.10902		1.14516	1.10477	1.28462	1.08093	1.17038	1.02693	1.13883	1.01049	1.25683	1.12729		1.09624	1.0983	1.23913	1.13216	1.1232	1.05362
1.11022	1.11912	1.0713	1.04228	1.2544	1.3978	1.11082	1.0218	1.09201	1.08814		1.0521	1.25798	1.01056	1.16297	1.20964	1.21837	1.60065	1.75603	1.01641	1.41766		1.19036	1.02616	1.08427	1.17148	1.11417	1.10593	1.13679	1.09616	1.15839	1.09808		1.14324	1.10373	1.27816	1.07928	1.13605	1.01566	1.15589	1	1.19526	1.14567		1.14226	1.11613	1.25139	1.09628	1.12754	1.06121
1.11975	1.12057	1.05622	1.04942	1.23744	1.40116	1.12329	1.04666	1.08605	1.09735		1.05308	1.26659	1.01524	1.16253	1.20392	1.22114	1.55846	1.7398	1.01164	1.42138		1.16461	1.02803	1.07476	1.18366	1.13674	1.02483	1.14072	1.09384	1.16414	1.09256		1.13875	1.09398	1.27833	1.08476	1.1457	1.02592	1.15668	1.00796	1.23303	1.13515		1.14988	1.10806	1.24619	1.13957	1.12222	1.06119
1.12399	1.1675	1.06398	1.03522	1.23377	1.40023	1.13622	1.04907	1.08639	1.09917		1.05442	1.26262	1.01808	1.16382	1.2031	1.22667	1.55801	1.76601	1.00707	1.42285		1.31072	1.01682	1.07918	1.20275	1.13916	1.0871	1.14537	1.07674	1.16561	1.09671		1.13263	1.10282	1.2778	1.07591	1.15705	1.02274	1.17416	1.01985	1.2307	1.1365		1.11736	1.11749	1.24849	1.12512	1.12194	1.06869
1.12901	1.10924	1.04708	1.04577	1.19897	1.42367	1.12846	1.03533	1.1013	1.10674		1.05941	1.24744	1.0206	1.1653	1.20209	1.2319	1.57731	1.76872	1.00917	1.42802		1.29721	1.02863	1.10038	1.21723	1.15186	1.0528	1.14824	1.09472	1.16734	1.10688		1.13441	1.10587	1.2845	1.08574	1.16104	1.02484	1.16201	1.02759	1.23211	1.14837		1.10779	1.12085	1.25317	1.14094	1.13449	1.07368
1.12718	1.1374	1.06422	1.04055	1.13064	1.38736	1.16567	1.05213	1.10325	1.091		1.0591	1.25354	1.02322	1.1672	1.2018	1.236	1.57584	1.75215	1.00535	1.42665		1.57218	1.06568	1.10879	1.23704	1.1596	1.08163	1.14834	1.08941	1.16833	1.10114		1.13355	1.12282	1.27858	1.09974	1.16682	1.02485	1.14425	1.02785	1.18276	1.15667		1.1679	1.11861	1.25494	1.11084	1.13887	1.08026
1.13275	1.1373	1.06104	1.05514	1.15684	1.44169	1.13403	1.07179	1.11983	1.10405		1.0611	1.26784	1.02925	1.16523	1.17997	1.23397	1.56841	1.73168	1.01191	1.4387		1.64736	1.06494	1.09634	1.24174	1.14334	1.06405	1.13457	1.09327	1.16904	1.09446		1.1325	1.12179	1.28414	1.10654	1.1695	1.0204	1.18117	1.03697	1.17682	1.19357		1.15625	1.12267	1.26228	1.1159	1.13931	1.08628
1.13135	1.15683	1.07375	1.06442	1.17956	1.44312	1.12975	1.05966	1.08959	1.11443		1.06257	1.26215	1.0395	1.16759	1.21741	1.23764	1.60904	1.76164	1.01224	1.43955		1.59016	1.06774	1.1122	1.23446	1.1825	1.10221	1.14568	1.10658	1.16778	1.11354		1.13755	1.13057	1.27982	1.12158	1.1506	1.02058	1.13564	1.04069	1.17597	1.20253		1.16086	1.13199	1.25178	1.14212	1.10993	1.08924
1.15037	1.13242	1.0765	1.05121	1.18931	1.45869	1.15559	1.08369	1.1082	1.10932		1.06193	1.26633	1.04246	1.16562	1.2137	1.23577	1.59473	1.77288	1.0087	1.43845		1.63907	1.06836	1.11095	1.20533	1.17178	1.10642	1.15783	1.08335	1.17898	1.13194		1.14783	1.11654	1.27568	1.1202	1.18088	1.02571	1.17477	1.04369	1.1795	1.20042		1.16304	1.12648	1.26201	1.16064	1.13022	1.09729
1.15284	1.1515	1.09102	1.07664	1.15427	1.44756	1.14359	1.08152	1.13056	1.13207		1.06499	1.28735	1.04812	1.16504	1.18734	1.23837	1.55344	1.73965	1.0055	1.42174		1.48383	1.07167	1.09261	1.19672	1.14837	1.09786	1.15842	1.10644	1.17386	1.13346		1.15399	1.11479	1.28724	1.12816	1.17593	1.02165	1.15455	1.0435	1.19249	1.18485		1.12893	1.13718	1.26339	1.16423	1.13618	1.10232
1.15092	1.15722	1.10279	1.07382	1.24883	1.39238	1.14149	1.09055	1.13263	1.1264		1.06387	1.27964	1.05571	1.16468	1.20207	1.18593	1.57909	1.75383	1.01147	1.41478		1.2486	1.07445	1.10288	1.19927	1.17167	1.0879	1.16274	1.13283	1.17613	1.13151		1.1512	1.12548	1.27234	1.1302	1.17664	1.02814	1.16139	1.0517	1.19159	1.18982		1.17578	1.14013	1.26478	1.15206	1.14622	1.10373
1.15982	1.16588	1.09915	1.08503	1.26227	1.46603	1.16756	1.10272	1.11386	1.12825		1.064	1.27699	1.06425	1.16388	1.2083	1.1034	1.5658	1.73761	1.01669	1.4234		1.16802	1.07523	1.11405	1.19004	1.18299	1.17344	1.16033	1.14425	1.17331	1.13112		1.15691	1.14974	1.27796	1.12624	1.17194	1.02846	1.14371	1.05821	1.19643	1.17477		1.11157	1.13956	1.27653	1.16148	1.14326	1.10943
1.16484	1.19324	1.11341	1.07617	1.27777	1.42459	1.18474	1.104	1.12835	1.13305		1.06227	1.30328	1.0664	1.16524	1.21633	1.14564	1.56922	1.73549	1.01152	1.4219		1.35787	1.08198	1.11593	1.17073	1.16716	1.12948	1.15684	1.16917	1.18192	1.147		1.1501	1.14064	1.27876	1.12959	1.1688	1.02056	1.16606	1.06612	1.17874	1.18771		1.1815	1.15248	1.28077	1.18115	1.17347	1.11632
1.17164	1.1807	1.12103	1.08747	1.17449	1.46015	1.18703	1.10539	1.15895	1.13896		1.06255	1.28932	1.07813	1.1666	1.20548	1.17722	1.59342	1.72082	1.01582	1.42039		1.31841	1.07168	1.15048	1.14795	1.17344	1.13072	1.17315	1.18402	1.18092	1.13814		1.15801	1.1579	1.27794	1.13805	1.19008	1.02271	1.18615	1.08185	1.17694	1.21343		1.16885	1.15694	1.26569	1.17908	1.16583	1.12745
1.18596	1.15392	1.12411	1.12332	1.21019	1.45061	1.1673	1.11765	1.14645	1.15582		1.06789	1.29854	1.09218	1.16465	1.21897	1.20288	1.59505	1.76472	1.01842	1.42587		1.1584	1.08207	1.15399	1.13449	1.17958	1.14949	1.17822	1.12922	1.18558	1.13768		1.13542	1.1422	1.28148	1.14284	1.18683	1.0181	1.15246	1.08868	1.18283	1.16337		1.1019	1.15746	1.2728	1.19658	1.17443	1.13351
1.18935	1.16209	1.11892	1.12715	1.09893	1.50463	1.20749	1.12302	1.14126	1.15819		1.07275	1.30014	1.10534	1.16522	1.18773	1	1.5887	1.76771	1.01606	1.42117		1.18581	1.09315	1.17133	1.11344	1.21653	1.17863	1.1685	1.19579	1.18239	1.1514		1.15533	1.14539	1.28266	1.14365	1.18608	1.02897	1.17885	1.10298	1.17269	1.20434		1.20962	1.17346	1.28249	1.16845	1.16558	1.13877
1.19036	1.21128	1.16005	1.13637	1.24237	1.49829	1.18354	1.13916	1.16235	1.16498		1.07623	1.28019	1.10957	1.16359	1.24354	1.061	1.5909	1.74061	1.01736	1.42404		1.34848	1.10016	1.18232	1.10534	1.20307	1.16756	1.18492	1.19905	1.19097	1.15149		1.14976	1.15002	1.29294	1.15115	1.18274	1.025	1.16792	1.09742	1.1921	1.19598		1.17686	1.16873	1.28011	1.19004	1.18315	1.14668
1.19564	1.19733	1.15872	1.14623	1.14464	1.458	1.20313	1.15868	1.15083	1.17447		1.08005	1.30821	1.11423	1.1634	1.20775	1.10715	1.5743	1.72385	1.01592	1.41915		1.38893	1.1175	1.18854	1.11298	1.2015	1.16074	1.18512	1.245	1.19523	1.18033		1.14593	1.14038	1.28435	1.17635	1.18677	1.0232	1.15643	1.13026	1.17369	1.18856		1.20708	1.18151	1.27557	1.17919	1.16821	1.15985
1.19699	1.20993	1.15564	1.15229	1.18556	1.47387	1.19542	1.15064	1.15933	1.17646		1.08461	1.31824	1.12814	1.16174	1.23945	1.14906	1.57165	1.75105	1.0165	1.40658		1.25222	1.1298	1.20525	1.11245	1.22424	1.18758	1.19225	1.23362	1.19643	1.17121		1.14223	1.14807	1.28774	1.18846	1.17773	1.01289	1.19396	1.13472	1.19563	1.19946		1.17002	1.18293	1.29447	1.18521	1.17888	1.16906
1.19722	1.18576	1.18686	1.16402	1.16167	1.4863	1.20353	1.18213	1.18123	1.18744		1.08945	1.3236	1.1359	1.16301	1.25583	1.17965	1.59163	1.70514	1.01474	1.40409		1.34152	1.13195	1.19574	1.10373	1.19691	1.19094	1.19	1.21149	1.19725	1.15265		1.14488	1.16419	1.28707	1.18524	1.19358	1.00956	1.16926	1.16231	1.15409	1.21746		1.1471	1.18826	1.28791	1.18996	1.20553	1.17843
1.20217	1.19419	1.19179	1.18902	1.14081	1.50961	1.18621	1.19072	1.17121	1.2011		1.09785	1.31238	1.14759	1.1641	1.23063	1.20633	1.58802	1.70771	1.02002	1.40052		1.25255	1.13925	1.19904	1.11482	1.23697	1.23936	1.18577	1.21697	1.20194	1.17929		1.13215	1.17206	1.28466	1.20306	1.17517	1.02338	1.16944	1.18081	1.18095	1.18836		1.18432	1.19245	1.29114	1.21236	1.18419	1.17956
1.22899	1.18215	1.18555	1.19997	1.19317	1.52642	1.19877	1.19437	1.19505	1.19702		1.09753	1.31367	1.16899	1.16399	1.20975	1.22535	1.59704	1.76669	1.01695	1.40239		1.29001	1.13407	1.19334	1.15835	1.18768	1.1974	1.18205	1.19953	1.19997	1.19238		1.13043	1.1894	1.29389	1.19672	1.1752	1.01522	1.1514	1.19454	1.19303	1.17157		1.18312	1.18196	1.27983	1.19392	1.19165	1.19887
1.23095	1.21128	1.20216	1.21677	1.2265	1.53416	1.22203	1.21588	1.21648	1.21171		1.10045	1.31249	1.20023	1.16301	1.2305	1.241	1.61019	1.73345	1.01358	1.41365		1.42664	1.40878	1.22189	1.21272	1.25826	1.25559	1.20825	1.23662	1.20847	1.20732		1.13641	1.20134	1.28316	1.2073	1.21257	1.01312	1.1784	1.20422	1.21084	1.22522		1.22551	1.20011	1.31118	1.23283	1.21438	1.21039
1.23925	1.21957	1.23013	1.23772	1.27504	1.4937	1.22457	1.22046	1.23474	1.21257		1.10159	1.32784	1.21307	1.16287	1.2271	1.24945	1.61123	1.7313	1.01295	1.42629		1.36845	2.00076	1.21619	1.25766	1.22075	1.23401	1.20245	1.25785	1.20404	1.20299		1.13578	1.21481	1.28832	1.22162	1.22177	1.02132	1.16673	1.2423	1.25373	1.19673		1.19861	1.20406	1.31441	1.21379	1.22819	1.21877
1.22999	1.24928	1.22691	1.24539	1.20797	1.56272	1.23523	1.24609	1.20331	1.23362		1.10476	1.32723	1.21863	1.15874	1.21195	1.26654	1.6366	1.74346	1.01634	1.4264		1.30861	2.16147	1.2656	1.28056	1.25138	1.31038	1.20749	1.23185	1.20544	1.21042		1.13847	1.21026	1.29063	1.23743	1.27104	1.02384	1.18573	1.26927	1.24976	1.26067		1.22623	1.21225	1.30899	1.2168	1.21811	1.22305
1.23757	1.24165	1.24057	1.26596	1.21168	1.52758	1.25254	1.25825	1.22754	1.24626		1.1059	1.32278	1.23906	1.15913	1.2239	1.27751	1.60022	1.74719	1.0165	1.42624		1.44606	2.73206	1.23605	1.28802	1.2493	1.17796	1.21906	1.29095	1.2073	1.2132		1.13994	1.20798	1.28789	1.35167	1.2563	1.02618	1.18297	1.26273	1.28241	1.2279		1.19477	1.21877	1.32853	1.20977	1.24537	1.23193
1.24936	1.25191	1.26153	1.29523	1.28682	1.53356	1.24145	1.26999	1.23277	1.25814		1.11023	1.3238	1.26232	1.15913	1.21984	1.28804	1.63052	1.76672	1.0127	1.43929		1.57509	3.10402	1.23184	1.30862	1.24185	1.32534	1.21666	1.29641	1.20749	1.20312		1.136	1.21526	1.29807	1.40676	1.28123	1.02321	1.1306	1.32601	1.53794	1.23323		1.25458	1.21773	1.32382	1.25305	1.2348	1.23969
1.24663	1.25756	1.30727	1.30081	1.2898	1.5456	1.26507	1.29577	1.25118	1.26007		1.10836	1.32887	1.27751	1.15725	1.22139	1.29624	1.62317	1.76591	1.01667	1.43756		1.58941	3.42265	1.22261	1.31993	1.27118	1.2539	1.21581	1.30499	1.21822	1.24506		1.14146	1.2129	1.29458	1.62949	1.2814	1.02805	1.17157	1.32293	1.61414	1.27744		1.17752	1.23242	1.3373	1.27092	1.24018	1.24918
1.24881	1.26153	1.32447	1.33579	1.33579	1.52679	1.26088	1.30028	1.26899	1.26641		1.1205	1.33017	1.28723	1.15499	1.22442	1.29602	1.64759	1.76182	1.0173	1.43064		1.39093	3.96192	1.22612	1.33169	1.27137	1.3755	1.23028	1.27437	1.21335	1.22991		1.14829	1.22017	1.298	1.65524	1.27661	1.01992	1.19238	1.36911	1.66544	1.32211		1.21843	1.23788	1.33374	1.22249	1.22608	1.25767
1.24746	1.28856	1.33873	1.37952	1.39145	1.56947	1.26232	1.32812	1.27395	1.2916		1.12318	1.33076	1.29916	1.15572	1.1976	1.30429	1.60936	1.71604	1.01758	1.41848		1.39424	3.98934	1.2384	1.33563	1.24645	1.27553	1.24874	1.31054	1.21687	1.25275		1.15277	1.23433	1.30098	1.66916	1.26612	1.02357	1.18243	1.35491	1.65714	1.35667		1.2375	1.24649	1.34517	1.27611	1.24393	1.27215
1.2515	1.2982	1.36281	1.39596	1.41035	1.58352	1.28733	1.33834	1.2841	1.30512		1.12369	1.33945	1.3188	1.15869	1.23432	1.31215	1.63407	1.72968	1.01506	1.41972		1.41431	4.65614	1.26214	1.32685	1.26888	1.25464	1.25011	1.29449	1.21162	1.24822		1.15162	1.22217	1.29371	1.67029	1.2819	1.0233	1.13857	1.3591	1.59103	1.32167		1.20683	1.26176	1.34827	1.26584	1.26769	1.28411
1.26174	1.25165	1.40565	1.4124	1.36553	1.5962	1.25547	1.36617	1.2697	1.31949		1.12538	1.35009	1.33437	1.1576	1.22328	1.3288	1.66008	1.74805	1.01337	1.41562		1.27566	4.62035	1.26925	1.32234	1.26419	1.33192	1.2719	1.30627	1.21072	1.26327		1.1475	1.24457	1.30008	1.67034	1.30297	1.02951	1.18399	1.34032	1.55162	1.31917		1.22013	1.24733	1.3497	1.2842	1.24127	1.29307
1.27365	1.27507	1.43906	1.45522	1.3265	1.58166	1.32047	1.36433	1.30329	1.32707		1.13148	1.34534	1.35944	1.15664	1.19531	1.32915	1.62754	1.73315	1.01391	1.42395		1.25364	5.18738	1.28648	1.32336	1.31411	1.40823	1.29236	1.37695	1.21404	1.2645		1.14692	1.25328	1.30146	1.67748	1.28656	1.02742	1.179	1.34388	1.5186	1.29428		1.19372	1.27239	1.37544	1.26416	1.26409	1.31263
1.27507	1.26976	1.52792	1.48128	1.32085	1.55872	1.30451	1.39087	1.33324	1.35159		1.13125	1.3451	1.37241	1.157	1.22049	1.33508	1.62809	1.72299	1.01105	1.41649		1.30905	5.16423	1.27645	1.31668	1.28029	1.43358	1.27827	1.40776	1.21188	1.2823		1.1445	1.27221	1.29622	1.68937	1.29158	1.04085	1.17148	1.36621	1.56229	1.26884		1.20461	1.27033	1.36431	1.29957	1.1886	1.3258
1.29438	1.27408	1.56379	1.54035	1.29113	1.58395	1.32906	1.41413	1.34206	1.35867		1.1369	1.34814	1.39072	1.15495	1.24574	1.33695	1.66083	1.73557	1.01595	1.41766		1.54435	5.57369	1.27902	1.33322	1.32841	1.41668	1.27473	1.4271	1.21761	1.27872		1.14447	1.27414	1.29681	1.68928	1.28234	1.02721	1.12753	1.35055	1.55358	1.24746		1.21269	1.28066	1.37483	1.3356	1.21149	1.34055
1.31122	1.32544	1.59439	1.55677	1.38207	1.58098	1.34464	1.44334	1.36608	1.37771		1.14163	1.33705	1.40039	1.15683	1.22891	1.34568	1.62547	1.73854	1.01765	1.42138		1.47747	5.61939	1.27274	1.33302	1.28459	1.43949	1.2653	1.43209	1.21749	1.29568		1.14684	1.31111	1.29604	1.71114	1.26513	1.03502	1.16116	1.32944	1.54549	1.23431		1.23089	1.29111	1.37706	1.33321	1.18555	1.35424
1.31689	1.35388	1.59378	1.59084	1.3499	1.6049	1.35199	1.46772	1.36555	1.39046		1.14698	1.36205	1.42113	1.15799	1.22971	1.35112	1.68724	1.74956	1.01825	1.41739		1.48585	6.06566	1.27372	1.33315	1.32521	1.46537	1.28718	1.44193	1.22958	1.32056		1.14693	1.33348	1.29208	1.69785	1.26444	1.03712	1.17999	1.35758	1.4923	1.22475		1.26161	1.29188	1.38216	1.34591	1.21254	1.37098
1.30703	1.37874	1.60991	1.62827	1.33681	1.60616	1.33166	1.4697	1.38803	1.40033		1.1536	1.35055	1.43408	1.15419	1.21877	1.36527	1.67304	1.74062	1.01602	1.42033		1.32628	6.01817	1.26809	1.36342	1.30511	1.45623	1.3186	1.45717	1.25488	1.30612		1.16011	1.31263	1.2898	1.72754	1.27262	1.03673	1.17148	1.33801	1.4749	1.24661		1.27501	1.30471	1.38602	1.35068	1.26201	1.37904
1.32177	1.3268	1.61509	1.66714	1.3545	1.61205	1.33618	1.50511	1.41804	1.41046		1.15054	1.34399	1.43462	1.15389	1.24764	1.37208	1.6235	1.75273	1.01791	1.41915		1.26071	6.39916	1.25812	1.34363	1.35043	1.48973	1.30633	1.4507	1.30224	1.33311		1.1529	1.32413	1.29683	1.74475	1.26994	1.04039	1.16679	1.30185	1.30919	1.22594		1.23918	1.31287	1.3926	1.35469	1.26876	1.38457
1.3635	1.36646	1.61914	1.70484	1.36776	1.62451	1.33657	1.52196	1.45336	1.43118		1.14828	1.3459	1.45575	1.15508	1.24497	1.36888	1.6706	1.74463	1.01721	1.42199		1.35463	6.24607	1.27238	1.33738	1.29964	1.61601	1.33065	1.47111	1.32821	1.3522		1.155	1.31458	1.28804	1.75965	1.3063	1.03286	1.15763	1.29577	1.29552	1.23508		1.28666	1.32634	1.40302	1.36371	1.30544	1.40753
1.40128	1.38339	1.64193	1.74081	1.26899	1.60261	1.36732	1.53673	1.43893	1.46132		1.15663	1.36804	1.463	1.15479	1.22792	1.3675	1.69582	1.73522	1.01766	1.41312		1.48375	6.64496	1.30821	1.33944	1.34301	1.53574	1.33379	1.49867	1.33566	1.35472		1.16465	1.31128	1.29914	1.75554	1.2978	1.02952	1.15004	1.31826	1.30742	1.23403		1.24854	1.34197	1.4069	1.37849	1.31198	1.40933
1.37647	1.37102	1.64493	1.80309	1.42731	1.61013	1.35672	1.56045	1.47656	1.47993		1.16202	1.37356	1.49	1.1508	1.22367	1.38234	1.67587	1.77843	1.01787	1.42034		1.3532	6.52522	1.32111	1.31892	1.36012	1.59206	1.33749	1.50748	1.35868	1.39178		1.15856	1.31795	1.28971	1.79165	1.30166	1.0314	1.16082	1.32977	1.28676	1.25004		1.30977	1.35924	1.41844	1.37267	1.30703	1.42331
1.39128	1.34189	1.67501	1.82691	1.34223	1.66838	1.37922	1.58131	1.49789	1.50227		1.16766	1.38821	1.51186	1.15212	1.21078	1.39613	1.67708	1.76037	1.02018	1.41755		1.49344	6.81239	1.33247	1.32858	1.33436	1.66302	1.35259	1.463	1.35931	1.39504		1.15115	1.33635	1.29137	1.77925	1.33189	1.02504	1.15618	1.32854	1.29228	1.23518		1.28722	1.36395	1.41093	1.39628	1.31779	1.44516
1.40481	1.37096	1.66965	1.89222	1.4079	1.61788	1.39724	1.58647	1.50579	1.52784		1.17311	1.382	1.53067	1.15076	1.23602	1.40144	1.68624	1.73401	1.02005	1.41372		1.57356	6.64121	1.3558	1.33457	1.31308	1.67923	1.36948	1.53488	1.35786	1.39713		1.14968	1.32864	1.2857	1.78245	1.35209	1.02507	1.16527	1.33245	1.32299	1.25257		1.2484	1.36878	1.44089	1.35116	1.28584	1.45507
1.40432	1.38925	1.69779	1.9619	1.3941	1.67148	1.41696	1.60227	1.53677	1.55584		1.17482	1.36872	1.55547	1.15116	1.21701	1.39622	1.68766	1.75638	1.02089	1.41561		1.44621	6.97222	1.35749	1.33747	1.35661	1.73377	1.37727	1.54828	1.37824	1.39661		1.15112	1.3216	1.30215	1.79686	1.36673	1.00659	1.19085	1.31073	1.31322	1.25298		1.32796	1.38246	1.44701	1.38878	1.22429	1.47608
1.40568	1.42464	1.68678	2.03783	1.33781	1.71462	1.412	1.61268	1.53157	1.54991		1.18095	1.37881	1.57681	1.1506	1.21384	1.40269	1.64386	1.76741	1.01568	1.41814		1.54621	6.72329	1.3625	1.32822	1.36804	1.68458	1.36681	1.64384	1.38786	1.42699		1.14445	1.30512	1.29743	1.81889	1.38361	1.02083	1.18519	1.26972	1.30167	1.24312		1.27876	1.38483	1.43972	1.41265	1.27051	1.49618
1.42145	1.45643	1.73162	2.07692	1.36763	1.68361	1.40076	1.62863	1.59482	1.57409		1.18145	1.38412	1.58942	1.15265	1.22929	1.41175	1.60061	1.75382	1.01826	1.4157		1.54355	7.01152	1.3566	1.32277	1.3705	1.6699	1.38889	1.56795	1.42944	1.45157		1.14162	1.30972	1.29826	1.82729	1.39754	1.02522	1.17453	1.27056	1.31196	1.24903		1.30723	1.41061	1.44798	1.40705	1.28129	1.51928
1.42784	1.4069	1.75772	2.11186	1.4115	1.67963	1.45609	1.62834	1.59694	1.59935		1.18616	1.36804	1.60345	1.1524	1.21356	1.40654	1.63143	1.7592	1.01764	1.4061		1.34124	6.79524	1.37096	1.35719	1.38065	1.88593	1.42	1.63952	1.44545	1.46103		1.13699	1.35954	1.29597	1.86371	1.3993	1.02324	1.16887	1.31587	1.29032	1.24399		1.26375	1.42782	1.44806	1.4051	1.24805	1.54228
1.42114	1.44722	1.77504	2.16655	1.4224	1.67058	1.45077	1.63889	1.626	1.61262		1.19044	1.39508	1.6383	1.15547	1.20969	1.41206	1.65615	1.76201	1.01861	1.40325		1.60655	7.01994	1.36713	1.35069	1.41036	1.77941	1.43461	1.65768	1.46034	1.47292		1.14063	1.37746	1.29826	1.84322	1.38953	1.02733	1.15302	1.2826	1.29544	1.24349		1.31956	1.42833	1.44788	1.40146	1.28971	1.56628
1.43657	1.43956	1.81136	2.24044	1.50886	1.7377	1.44159	1.63949	1.66477	1.63659		1.19159	1.39334	1.65434	1.15763	1.20858	1.41301	1.64644	1.73957	1.0233	1.40135		1.66185	6.86302	1.37923	1.33941	1.41559	1.79323	1.41274	1.64792	1.47307	1.5254		1.14211	1.34125	1.30256	1.87768	1.40556	1.03083	1.14781	1.27245	1.25371	1.26937		1.30571	1.45076	1.46322	1.4581	1.31719	1.59129
1.44943	1.47641	1.92329	2.29879	1.51123	1.7105	1.48243	1.66496	1.70089	1.65661		1.19603	1.39994	1.68628	1.16146	1.21102	1.42195	1.64183	1.74367	1.02462	1.39272		1.49614	7.04794	1.39826	1.33452	1.39985	1.96378	1.45614	1.67106	1.47255	1.52403		1.14313	1.32337	1.29829	1.93365	1.39691	1.03073	1.18305	1.28583	1.24287	1.27338		1.31469	1.46827	1.48017	1.4739	1.33407	1.60939
1.45402	1.48209	2.06178	2.40177	1.46071	1.66905	1.50623	1.6668	1.72775	1.67748		1.19847	1.40417	1.69569	1.16138	1.21739	1.4315	1.68858	1.768	1.02024	1.39342		1.37186	6.75923	1.39727	1.35002	1.35703	2.04563	1.47218	1.73197	1.47731	1.537		1.14271	1.3235	1.29731	1.96326	1.3865	1.02848	1.17618	1.27203	1.25011	1.30742		1.32731	1.48121	1.48751	1.48763	1.32335	1.62854
1.46058	1.50158	2.13738	2.44899	1.4636	1.71038	1.51347	1.67445	1.80356	1.69327		1.20055	1.39693	1.71812	1.16219	1.20879	1.43926	1.64691	1.76879	1.02313	1.39747		1.32414	7.02508	1.44624	1.36329	1.43582	2.1686	1.48991	1.72235	1.48501	1.56293		1.14215	1.32704	1.3044	1.98941	1.39984	1.02934	1.1779	1.2682	1.26236	1.29177		1.3308	1.49126	1.49093	1.51915	1.34489	1.63956
1.47811	1.46095	2.21022	2.49964	1.50766	1.6861	1.51738	1.68372	1.82319	1.71973		1.20341	1.41815	1.72951	1.16019	1.2301	1.44023	1.6567	1.72401	1.02292	1.40475		1.32361	6.73136	1.441	1.3792	1.4458	2.15833	1.49189	1.74341	1.50058	1.56415		1.139	1.35391	1.29993	1.87643	1.4028	1.02576	1.16204	1.27322	1.20981	1.27742		1.31596	1.50919	1.49999	1.49289	1.29708	1.66256
1.47968	1.52182	2.21452	2.56249	1.52437	1.73971	1.50476	1.70819	1.85844	1.74881		1.20746	1.39485	1.74888	1.15949	1.22074	1.45224	1.65183	1.75297	1.02472	1.41499		1.64227	6.89968	1.45762	1.36546	1.43085	2.17171	1.51093	1.8255	1.50011	1.56238		1.14435	1.35935	1.30646	1.86332	1.38938	1.02528	1.20153	1.27502	1.25275	1.26425		1.338	1.52885	1.50689	1.52867	1.27713	1.68035
1.49486	1.51116	2.25409	2.62167	1.5879	1.79603	1.50633	1.73971	1.8422	1.7549		1.21315	1.41401	1.76746	1.15706	1.23102	1.46195	1.66148	1.74919	1.02442	1.42049		1.72196	6.60936	1.41644	1.3652	1.50907	2.13888	1.54029	1.82222	1.50305	1.62715		1.14524	1.36176	1.29948	1.88494	1.4025	1.02704	1.16644	1.30228	1.27307	1.27277		1.361	1.54418	1.51618	1.52881	1.25659	1.69589
1.48649	1.54595	2.25737	2.69113	1.44462	1.79364	1.57283	1.78096	1.93076	1.77896		1.21809	1.42423	1.77598	1.15851	1.1935	1.46852	1.65995	1.76489	1.0202	1.42505		1.58211	6.6318	1.42518	1.36538	1.4527	2.25536	1.54043	1.81961	1.51449	1.6744		1.14336	1.36228	1.30788	1.82921	1.41754	1.02993	1.15405	1.26316	1.26339	1.31975		1.32764	1.55622	1.5117	1.57884	1.26566	1.72061
1.50019	1.51252	2.30564	2.80413	1.56254	1.76858	1.57798	1.79541	1.99479	1.80639		1.21853	1.42	1.80459	1.15618	1.20709	1.48203	1.68862	1.72835	1.01857	1.43488		1.4997	6.41025	1.45552	1.34864	1.48265	2.3623	1.55616	1.85555	1.51569	1.6677		1.14139	1.35717	1.30048	1.90041	1.41615	1.02569	1.18895	1.26062	1.27344	1.30337		1.34351	1.57061	1.51909	1.58067	1.29765	1.74805
1.54726	1.52776	2.32357	2.85518	1.47354	1.78017	1.58739	1.82713	2.03183	1.82133		1.21939	1.41752	1.82345	1.15478	1.24206	1.49516	1.69542	1.75857	1.02369	1.43307		1.70908	6.10385	1.47398	1.34903	1.48349	2.47884	1.59	1.9386	1.51273	1.70352		1.14093	1.35799	1.30296	1.86233	1.43392	1.03181	1.15672	1.26406	1.28719	1.29262		1.38193	1.57844	1.53002	1.55031	1.27165	1.78323
1.56519	1.53171	2.30449	2.92824	1.49501	1.83238	1.6012	1.81819	2.07543	1.8435		1.22397	1.42414	1.83871	1.15581	1.2124	1.49724	1.67406	1.74165	1.01916	1.43697		1.57251	5.89049	1.50438	1.37331	1.55924	2.43199	1.58705	1.95058	1.53163	1.72722		1.13403	1.41177	1.30501	1.92936	1.44511	1.02204	1.18028	1.26565	1.28915	1.31939		1.38484	1.61098	1.55447	1.58178	1.31274	1.81443
1.5734	1.55305	2.35314	3.00455	1.69365	1.80493	1.59626	1.87442	2.12375	1.87082		1.22289	1.4311	1.86802	1.15572	1.21747	1.49222	1.65939	1.72588	1.02064	1.43417		1.6142	5.62526	1.52546	1.35772	1.5116	2.42692	1.60306	1.9696	1.53174	1.73484		1.13593	1.41412	1.29743	1.95523	1.48649	1.02982	1.17747	1.25541	1.29081	1.29243		1.36166	1.62373	1.56159	1.61123	1.31853	1.82446
1.55961	1.56069	2.37997	3.06158	1.72222	1.77815	1.60187	1.88045	2.14472	1.89735		1.22243	1.444	1.87955	1.15431	1.21526	1.50066	1.66412	1.75404	1.02043	1.42819		1.38502	5.45651	1.52992	1.35333	1.54013	2.42297	1.64813	2.02034	1.53251	1.75219		1.1324	1.4094	1.30004	1.89163	1.48221	1.0292	1.17704	1.25598	1.32693	1.30863		1.35745	1.64126	1.5587	1.60609	1.34379	1.85546
1.55474	1.5984	2.49447	3.14806	1.91901	1.8596	1.62221	1.93888	2.24658	1.91778		1.22462	1.44524	1.90072	1.15508	1.22903	1.50693	1.65766	1.76969	1.02031	1.42339		1.57772	5.33859	1.52833	1.36854	1.53569	2.48408	1.66958	2.04315	1.53673	1.82257		1.13454	1.39528	1.30466	1.93175	1.47869	1.03217	1.1464	1.2613	1.38313	1.31191		1.44546	1.65999	1.58794	1.63465	1.31487	1.88104
1.57967	1.61306	2.68674	3.21981	2.38832	1.8685	1.66332	1.96011	2.31315	1.93855		1.23091	1.44891	1.92443	1.15384	1.22278	1.51589	1.64807	1.72097	1.02653	1.41853		1.84044	5.15485	1.50105	1.36246	1.55494	2.5389	1.68831	2.11928	1.54156	1.78337		1.13242	1.38817	1.30035	1.94868	1.48073	1.02969	1.17068	1.30327	1.73374	1.3113		2.06657	1.68485	1.59656	1.64908	1.37156	1.90977
1.5887	1.62691	2.94404	3.29597	3.11269	1.86054	1.65633	1.99685	2.36735	1.98134		1.22952	1.45393	1.94068	1.1511	1.24416	1.52104	1.6829	1.75832	1.02433	1.41531		1.67507	4.99032	1.48876	1.3621	1.57391	2.54991	1.71381	2.16005	1.54398	1.84376		1.13231	1.40694	1.29442	1.95558	1.48745	1.02886	1.15271	1.26093	1.83543	1.33243		4.5053	1.70978	1.61209	1.66655	1.34715	1.94521
1.63905	1.63691	3.18122	3.39332	3.25147	1.8678	1.69164	2.03248	2.37529	2.00732		1.2343	1.45161	1.94555	1.15045	1.23791	1.53538	1.68891	1.75994	1.02275	1.41325		1.64657	4.89394	1.5121	1.35892	1.6083	2.66801	1.73246	2.13445	1.55195	1.85667		1.133	1.40628	1.31173	1.97996	1.51972	1.03681	1.16782	1.27891	1.81691	1.36648		5.63048	1.72127	1.62632	1.67253	1.38284	1.97788
1.67643	1.63619	3.29052	3.48858	3.42263	1.86447	1.65457	2.05903	2.43162	2.04109		1.24083	1.45672	1.96432	1.15222	1.23808	1.54532	1.68781	1.76221	1.02641	1.42067		1.64184	4.73216	1.52414	1.3674	1.53354	2.79386	1.78424	2.19745	1.54894	1.92406		1.13471	1.40588	1.30416	1.99236	1.52168	1.0281	1.1705	1.27914	1.83968	1.41088		6.05982	1.75044	1.62918	1.7068	1.37158	2.01815
1.6935	1.68226	3.3264	3.54298	3.37172	1.88208	1.69582	2.10755	2.52221	2.06754		1.24169	1.45677	1.98547	1.15297	1.2407	1.5496	1.66402	1.75992	1.02409	1.41969		1.7291	4.56338	1.54348	1.37741	1.61059	2.74515	1.76379	2.20423	1.56468	1.93474		1.13226	1.41988	1.30426	2.03052	1.54152	1.03359	1.14294	1.27558	1.86099	1.41068		6.27009	1.78831	1.66307	1.69788	1.39843	2.07818
1.71919	1.69013	3.39226	3.67726	3.36458	1.90845	1.73566	2.15573	2.59281	2.08218		1.23835	1.4504	2.01326	1.1531	1.22957	1.5607	1.69687	1.73318	1.02388	1.41814		1.70043	4.42337	1.53266	1.39065	1.61344	2.75316	1.82605	2.26074	1.56271	1.94839		1.14815	1.461	1.30787	2.04728	1.55974	1.03547	1.17314	1.28598	1.73949	1.4035		6.20573	1.81287	1.65685	1.72937	1.40083	2.15086
1.74881	1.72583	3.4015	3.722	3.293	1.84565	1.76643	2.16572	2.65625	2.11174		1.24614	1.46107	2.01942	1.15774	1.21505	1.56629	1.68974	1.78253	1.02029	1.41614		1.9262	4.26262	1.5737	1.39426	1.64838	2.7995	1.85083	2.25359	1.57759	1.97975		1.13939	1.46237	1.30269	2.08011	1.58327	1.03327	1.18372	1.28368	1.69768	1.46741		5.73066	1.84279	1.66038	1.69824	1.3573	2.2421
1.76217	1.71795	3.39101	3.84039	3.63005	1.92259	1.74663	2.22483	2.70058	2.13998		1.24663	1.46575	2.03362	1.15949	1.20387	1.58094	1.68919	1.75348	1.022	1.41727		1.84992	4.1566	1.6125	1.37385	1.70425	2.77681	1.88175	2.3239	1.57873	2.02104		1.14002	1.49846	1.30197	2.0973	1.61354	1.04153	1.18496	1.29861	1.72145	1.5006		5.5678	1.86609	1.67192	1.70109	1.29235	2.32267
1.74531	1.74166	3.39384	3.88642	3.79801	1.91818	1.76998	2.26371	2.80276	2.14916		1.24392	1.48226	2.05175	1.16204	1.23363	1.58588	1.63591	1.75762	1.02019	1.41276		1.59505	4.00319	1.57445	1.37174	1.66196	2.84655	1.89023	2.34638	1.58401	2.03334		1.13509	1.51264	1.30262	2.08766	1.60248	1.03769	1.16589	1.35238	1.63704	1.52104		5.84142	1.90481	1.69781	1.79158	1.3132	2.38838
1.75035	1.7353	3.40804	3.95127	3.88313	1.90595	1.81484	2.32671	2.8645	2.18691		1.24835	1.48112	2.07112	1.15901	1.21499	1.59876	1.68137	1.76867	1.02315	1.42232		1.59475	3.96128	1.61427	1.39252	1.70784	2.86777	1.90683	2.42347	1.58675	2.07539		1.13655	1.51106	1.30009	2.08143	1.59169	1.03727	1.18808	1.32628	1.59796	1.51719		5.92863	1.89368	1.69738	1.75858	1.33525	2.46594
1.77608	1.76418	3.4248	4.01755	3.9637	1.93754	1.82395	2.35293	2.96106	2.20984		1.24414	1.48033	2.09311	1.15779	1.20832	1.61651	1.66587	1.75409	1.01804	1.41906		1.63487	3.85138	1.61015	1.39778	1.68616	2.86254	1.99166	2.53444	1.59404	2.12015		1.1383	1.51471	1.30917	2.09753	1.55558	1.0302	1.16806	1.32998	1.60026	1.52788		5.2846	1.93081	1.70734	1.76914	1.38132	2.53421
1.82993	1.77658	3.44083	4.10446	3.96864	1.92053	1.8449	2.40442	3.00877	2.31038		1.24826	1.4789	2.12397	1.15587	1.23082	1.62767	1.6723	1.74682	1.02139	1.41192		1.76037	3.77526	1.60756	1.41821	1.69575	2.95038	2.0059	2.52883	1.59394	2.12192		1.14375	1.54305	1.29408	2.10783	1.57153	1.0377	1.19373	1.34553	1.52315	1.56004		4.95149	1.96344	1.71837	1.851	1.40155	2.58037
1.84116	1.81459	3.474	4.17214	3.90887	1.99195	1.86375	2.50224	3.05902	2.39637		1.25044	1.48066	2.14456	1.15544	1.23645	1.628	1.64212	1.76859	1.02446	1.40688		1.78113	3.72954	1.65805	1.41972	1.72634	3.01014	2.01402	2.61688	1.61151	2.17618		1.15202	1.55455	1.31103	2.13007	1.56541	1.03567	1.16991	1.41409	1.32984	1.51643		5.03781	2.01254	1.72861	1.83817	1.38395	2.61615
1.84576	1.85521	3.51017	4.20188	3.9039	1.97175	1.90945	2.51018	3.17705	2.44341		1.25452	1.49301	2.17104	1.15419	1.20994	1.63152	1.70805	1.74924	1.02535	1.40688		1.77726	3.71745	1.69806	1.4287	1.77163	2.98032	2.04273	2.5916	1.60218	2.20701		1.15434	1.55587	1.30042	2.15202	1.55825	1.03648	1.15277	1.35406	1.35352	1.51549		4.92948	2.04804	1.73786	1.8659	1.408	2.66132
1.86656	1.83228	3.5751	4.41568	4.16638	2.0099	1.90256	2.59011	3.24686	2.47696		1.24951	1.49089	2.19474	1.15105	1.21602	1.63334	1.68687	1.75596	1.02496	1.40542		1.63374	3.7182	1.73139	1.42909	1.78944	3.10214	2.0851	2.62232	1.60418	2.22164		1.15838	1.55095	1.29601	2.18231	1.5665	1.0263	1.17856	1.39374	1.29506	1.50686		4.88124	2.09619	1.74138	1.90788	1.30786	2.70665
1.86536	1.87625	3.61073	4.43112	4.05538	2.00015	1.94652	2.62437	3.35988	2.50911		1.25182	1.47351	2.2099	1.15125	1.21837	1.64287	1.73618	1.755	1.02238	1.3934		1.6755	3.62161	1.74473	1.44811	1.78938	3.14796	2.10994	2.6342	1.61439	2.24132		1.15244	1.54612	1.3088	2.21909	1.54585	1.03255	1.18175	1.33894	1.34581	1.52249		5.26288	2.12155	1.7687	1.94281	1.3057	2.74464
1.87122	1.90648	3.65208	4.56953	4.10612	2.00456	1.91438	2.68458	3.4737	2.58641		1.25637	1.49334	2.231	1.15312	1.21354	1.66667	1.69144	1.79295	1.02597	1.40328		1.7077	3.61548	1.80745	1.43064	1.81971	3.24492	2.15736	2.74606	1.62132	2.28181		1.15257	1.55026	1.30271	2.26355	1.56406	1.03119	1.16793	1.35208	1.33279	1.53513		4.97534	2.14931	1.76821	1.93463	1.37004	2.82118
1.9089	1.90891	3.69984	4.62663	4.16212	2.03286	1.94013	2.73758	3.44939	2.74158		1.25618	1.51143	2.26382	1.15228	1.22992	1.67015	1.71288	1.78466	1.02559	1.39447		1.73182	3.61641	1.82235	1.43309	1.82756	3.07006	2.18632	2.79601	1.63561	2.2933		1.14869	1.54078	1.29996	2.33029	1.57131	1.0367	1.1773	1.34313	1.3449	1.54451		5.00645	2.20068	1.78922	1.95919	1.44689	2.87248
1.9294	1.87449	3.78619	4.63316	4.12635	2.0539	2.01516	2.78533	3.57895	2.93536		1.26096	1.50848	2.29964	1.15019	1.22006	1.67686	1.68193	1.76454	1.02957	1.3929		1.79637	3.63705	1.8283	1.44555	1.85087	3.18422	2.23431	2.88466	1.63531	2.27726		1.15037	1.52632	1.29078	2.36126	1.59046	1.03028	1.19006	1.34119	1.35506	1.50093		4.92698	2.22002	1.80713	2.0392	1.5151	2.92378
1.92725	1.93984	3.86853	4.72061	4.25716	2.0751	2.0218	2.87046	3.70039	3.13258		1.26307	1.51925	2.31863	1.14893	1.20778	1.69493	1.71203	1.78509	1.0278	1.3993		1.64537	3.65741	1.82269	1.45194	1.91408	3.27776	2.26049	2.93529	1.63327	2.30725		1.15339	1.51893	1.29999	2.39225	1.58087	1.04358	1.16633	1.39841	1.30328	1.48074		5.27684	2.26926	1.83234	2.06933	2.30682	3.00006
1.95033	1.99221	3.90668	4.81004	4.19164	2.03377	2.01613	2.92273	3.70298	3.34963		1.26405	1.52828	2.34173	1.14872	1.24511	1.70286	1.71504	1.73664	1.02145	1.40468		1.61112	3.60346	1.83732	1.46791	1.90617	3.36262	2.30652	2.99185	1.63873	2.32421		1.15052	1.53021	1.30074	2.39705	1.57465	1.0427	1.13727	1.4036	1.33602	1.51208		5.28875	2.3067	1.84563	2.14685	3.1	3.07128
2.01169	2.07614	3.96992	4.94026	4.31067	2.01819	2.06946	2.96024	3.82949	3.59166		1.26274	1.53019	2.36767	1.15049	1.223	1.71192	1.65734	1.73283	1.02037	1.40215		1.49711	3.64115	1.87475	1.49652	1.87299	3.41052	2.38002	2.99639	1.64902	2.37717		1.14311	1.54687	1.30846	2.40584	1.55819	1.04526	1.16172	1.40033	1.31619	1.55801		5.28224	2.36751	1.84382	2.21645	3.62331	3.16316
2.032	2.12949	4.08664	5.00664	4.32876	2.04842	2.10546	3.04137	3.94557	3.85285		1.26175	1.53401	2.38647	1.15052	1.21877	1.71466	1.66686	1.76738	1.02058	1.40052		1.7261	3.55655	1.903	1.50555	1.93462	3.45933	2.4055	3.08457	1.66443	2.36913		1.14436	1.54992	1.30517	2.43007	1.55541	1.04182	1.16517	1.36565	1.3624	1.53841		5.40743	2.40932	1.87936	2.24976	3.75439	3.23945
2.06127	2.23093	4.13828	5.14107	4.26639	2.07188	2.11856	3.11607	4.03742	4.10595		1.26317	1.53186	2.42777	1.1522	1.19976	1.72382	1.68033	1.74446	1.02187	1.40748		1.49636	3.54812	1.99169	1.50879	1.95213	3.40148	2.45079	3.22323	1.67186	2.37033		1.14817	1.54861	1.30362	2.44744	1.54391	1.04686	1.13921	1.4026	1.32723	1.56207		5.36862	2.43913	1.89012	2.29006	4.11523	3.32336
2.06475	2.24561	4.16913	5.08085	4.38309	2.09223	2.11067	3.11489	4.13426	4.36981		1.26807	1.53528	2.45161	1.15265	1.23086	1.73731	1.69803	1.76322	1.02469	1.40236		1.54447	3.57911	2.00353	1.51409	1.98438	3.43117	2.50325	3.36302	1.67267	2.40169		1.14487	1.56658	1.29132	2.48142	1.54285	1.04112	1.15899	1.3934	1.33099	1.60774		5.41459	2.49574	1.88256	2.41174	4.57941	3.40376
2.1043	2.34925	4.30867	5.163	4.42852	2.12074	2.17436	3.20567	4.20674	4.67606		1.26392	1.56183	2.4775	1.15423	1.22634	1.73904	1.65206	1.78574	1.02523	1.40215		1.67569	3.60726	2.03752	1.5307	2.01399	3.78813	2.59734	3.38067	1.68355	2.415		1.14477	1.56309	1.30181	2.52534	1.54574	1.04524	1.19575	1.34732	1.39635	1.6652		5.36664	2.54421	1.89059	2.53583	4.83443	3.49634
2.15215	2.4073	4.40557	5.21842	4.52906	2.07067	2.2339	3.29063	4.28473	5.04859		1.2614	1.56025	2.49108	1.1544	1.22471	1.7511	1.67886	1.76228	1.02586	1.39821		1.89186	3.55726	2.05941	1.53943	2.01705	3.78981	2.60131	3.50407	1.68903	2.41243		1.14369	1.57318	1.3006	2.56162	1.54173	1.0484	1.1356	1.35585	1.3969	1.68169		5.46791	2.61182	1.88004	2.51361	5.36174	3.56499
2.20228	2.58629	4.47265	5.36553	4.4213	2.13541	2.29729	3.37449	4.33812	5.38554		1.26787	1.56871	2.52655	1.15316	1.21644	1.76805	1.64766	1.72928	1.02496	1.40406		2.13556	3.624	2.06424	1.57205	2.04715	3.80536	2.67766	3.52138	1.70331	2.45454		1.13312	1.58686	1.29316	2.58722	1.53963	1.04552	1.18366	1.3475	1.39061	1.62216		5.45965	2.666	1.90935	2.6494	5.72929	3.68211
2.20344	2.66579	4.62802	5.34453	4.43455	2.16905	2.30242	3.42835	4.48694	5.76912		1.27433	1.57648	2.55445	1.15429	1.22952	1.77977	1.65299	1.76675	1.0296	1.41437		2.51635	3.54326	2.11029	1.58136	2.07503	4.01473	2.73557	3.54894	1.71265	2.43174		1.144	1.56611	1.29449	2.61337	1.54384	1.05119	1.1611	1.39949	1.39316	1.64212		5.48874	2.71006	1.94002	2.73602	6.29746	3.77865
2.23713	2.9245	4.73494	5.39792	4.9709	2.17905	2.31368	3.47662	4.54882	6.14234		1.27295	1.57944	2.58405	1.15382	1.21213	1.799	1.68257	1.74731	1.02949	1.40496		2.42241	3.60774	2.14032	1.60728	2.12942	3.98645	2.75458	3.5844	1.71145	2.45844		1.13715	1.56161	1.29689	2.64691	1.55898	1.04746	1.16317	1.36243	1.36845	1.66264		5.55131	2.75987	1.92824	2.72793	6.74233	3.86652
2.24873	3.11622	4.88605	5.51638	5.05862	2.1628	2.32671	3.55752	4.59913	6.61472		1.27116	1.58391	2.60601	1.15229	1.23245	1.80733	1.6652	1.74583	1.02419	1.39833		2.43255	3.59351	2.16257	1.61997	2.08569	3.98529	2.84173	3.69914	1.74121	2.46086		1.13586	1.57544	1.30509	2.68307	1.57557	1.05681	1.13213	1.36617	1.33622	1.66526		5.61341	2.83352	1.92608	2.84937	7.32858	3.96518
2.24996	3.40238	5.07932	5.61769	4.93945	2.17894	2.34265	3.67133	4.67385	7.06883		1.26967	1.58238	2.63176	1.1517	1.21357	1.8094	1.64842	1.75748	1.02408	1.39227		2.48547	3.63992	2.22426	1.6278	2.13065	3.93872	2.92083	3.7069	1.74605	2.45549		1.1355	1.57187	1.29266	2.68728	1.56048	1.04305	1.18646	1.37531	1.3483	1.65081		5.60639	2.91435	1.96811	2.76286	8.02379	4.0782
2.34333	3.7365	5.26187	5.60142	4.90712	2.26017	2.46003	3.73098	4.83039	7.54182		1.27836	1.59597	2.66998	1.15061	1.22291	1.82414	1.69231	1.75341	1.02729	1.39382		2.26408	3.66303	2.25619	1.62154	2.18282	3.89824	2.972	3.84788	1.76163	2.47414		1.13877	1.58938	1.29842	2.70365	1.55069	1.05201	1.13223	1.36622	1.70245	1.63749		5.7143	2.97071	1.97424	2.87779	8.55982	4.17812
2.37532	4.10512	5.48457	5.76079	5.07789	2.24905	2.47063	3.78028	4.86472	7.98292		1.2778	1.61279	2.70148	1.14849	1.21884	1.84257	1.66123	1.73531	1.02452	1.39476		2.34741	3.65271	2.2598	1.64263	2.19112	3.7878	3.00917	3.96316	1.76436	2.45994		1.14198	1.59648	1.29529	2.73334	1.55701	1.04645	1.12328	1.35881	1.9006	1.68756		5.67089	3.03099	1.995	2.85991	8.93799	4.27131
2.39501	4.34776	5.69711	5.80089	5.03911	2.19077	2.49485	3.87455	4.98681	8.50035		1.28012	1.61006	2.73974	1.14905	1.22942	1.85472	1.64031	1.75085	1.0261	1.39507		2.53003	3.6986	2.29554	1.65383	2.18666	3.93067	3.09996	4.00376	1.77529	2.50858		1.14696	1.59783	1.30345	2.73136	1.56719	1.04476	1.14545	1.40792	2.04933	1.6994		5.78212	3.12075	2.01528	2.8783	9.24244	4.37181
2.42678	4.65222	5.86323	5.9014	5.12507	2.24424	2.50978	3.96414	4.99458	9.00375		1.27761	1.61787	2.77754	1.14872	1.2277	1.8667	1.70477	1.77512	1.02661	1.40546		2.29305	3.62717	2.36244	1.66536	2.24652	4.07339	3.14234	4.0945	1.79588	2.43901		1.13998	1.59521	1.2984	2.75418	1.57143	1.03867	1.16141	1.36752	2.12617	1.71739		5.77036	3.18614	2.02166	2.89623	9.36702	4.46475
2.45468	4.84617	5.99187	5.92717	5.08006	2.287	2.61235	4.04031	5.09573	9.32225		1.27018	1.63139	2.81948	1.14736	1.2198	1.8721	1.68294	1.77753	1.02931	1.40013		2.41765	3.65508	2.39186	1.68322	2.27737	3.94909	3.22436	4.19819	1.79812	2.44955		1.13458	1.62161	1.30033	2.78246	1.52968	1.04308	1.14266	1.3664	2.11388	1.72636		5.76708	3.25618	2.01032	2.81098	9.59737	4.57258
2.47448	5.0569	6.10178	5.9248	5.36842	2.32095	2.58814	4.11401	5.22264	9.77433		1.26536	1.62381	2.84488	1.14827	1.22857	1.87932	1.63813	1.75976	1.02847	1.39721		2.3898	3.68987	2.38639	1.68322	2.2895	4.02398	3.32568	4.25106	1.80481	2.46546		1.13342	1.62407	1.29947	2.82012	1.54667	1.04029	1.14556	1.36396	2.07659	1.77518		5.94207	3.3075	2.05036	2.86356	9.35221	4.65769
2.49614	5.12849	6.23072	6.0647	5.35489	2.31916	2.64998	4.183	5.26241	9.99192		1.26888	1.63725	2.88348	1.14867	1.20818	1.89305	1.66507	1.81728	1.02469	1.3946		2.31304	3.73487	2.38696	1.71733	2.27437	4.02	3.36903	4.44241	1.81631	2.43341		1.12854	1.63407	1.29908	2.85483	1.53177	1.03899	1.14985	1.36757	2.01852	1.77945		6.00097	3.36646	2.1085	2.88841	9.32721	4.75229
2.53124	5.23254	6.30319	6.09619	5.20441	2.29277	2.67346	4.16214	5.34591	10.2626		1.27095	1.63168	2.90157	1.14929	1.21708	1.90633	1.69283	1.80211	1.03187	1.40225		2.3878	3.7244	2.40489	1.71908	2.35788	4.15366	3.49972	4.58147	1.83539	2.4311		1.13731	1.66195	1.31129	2.8817	1.53629	1.04396	1.14682	1.37643	2.00981	1.75878		5.91388	3.44822	2.11411	2.92186	9.35247	4.81908
2.59988	5.549	6.2958	6.10934	5.31593	2.43196	2.73238	4.30703	5.46296	10.8055		1.27267	1.64764	2.92262	1.14802	1.21408	1.92235	1.6494	1.76892	1.02553	1.40511		2.42066	3.70555	2.46327	1.70147	2.35654	4.27174	3.4788	4.76116	1.8457	2.442		1.13421	1.68812	1.30834	2.92919	1.52898	1.03466	1.15229	1.37397	1.97239	1.77339		5.9298	3.52305	2.13451	2.87956	9.21939	4.91512
2.57496	5.72863	6.3785	6.12121	5.32614	2.37468	2.76334	4.35252	5.43426	10.8041		1.27736	1.64807	2.94555	1.14629	1.22099	1.93336	1.62597	1.74564	1.03165	1.40387		2.00718	3.74836	2.49214	1.70684	2.37038	4.22579	3.56603	4.76302	1.8615	2.40546		1.13792	1.69186	1.31604	2.97123	1.52181	1.03907	1.14275	1.38645	1.89719	1.7658		5.94831	3.59146	2.15659	2.84495	9.38186	4.99807
2.62359	5.84223	6.42372	6.13085	5.16806	2.42525	2.82477	4.45033	5.42613	10.9528		1.27911	1.66861	2.9729	1.14718	1.20971	1.93527	1.681	1.77713	1.02438	1.41851		2.27312	3.79726	2.51264	1.72757	2.3962	4.10384	3.6826	4.92172	1.87471	2.39351		1.14082	1.68045	1.31455	3.04031	1.5266	1.03429	1.15112	1.39273	1.82688	1.78669		6.03925	3.70281	2.18772	2.86565	9.05548	5.09679
2.6836	6.07509	6.56599	6.26722	5.25464	2.42914	2.89461	4.5817	5.59165	10.9364		1.27755	1.68446	3.01378	1.14607	1.23797	1.94237	1.68741	1.78992	1.02711	1.4193		2.36442	3.84181	2.56435	1.74612	2.40845	4.41537	3.78324	5.07133	1.88389	2.36445		1.14942	1.69669	1.31399	3.11358	1.51326	1.03308	1.14824	1.3967	1.78518	1.78112		6.11601	3.77122	2.21113	2.80746	9.20286	5.18026
2.73261	6.15591	6.58866	6.297	5.41489	2.46212	2.84017	4.65754	5.65256	11.2669		1.27199	1.66687	3.04438	1.14608	1.23181	1.9588	1.66994	1.76388	1.02169	1.41682		2.41835	3.8306	2.65509	1.73279	2.44779	4.09589	3.82943	5.08767	1.89799	2.35349		1.15007	1.71364	1.31109	3.17826	1.52303	1.04455	1.14199	1.41226	1.87888	1.77827		6.05756	3.83728	2.24141	2.83389	9.15672	5.27376
2.76911	6.48886	6.65834	6.38983	5.52665	2.48411	2.96994	4.75381	5.68779	10.8868		1.277	1.68517	3.08743	1.14554	1.24204	1.96923	1.64793	1.77264	1.02437	1.41643		2.1478	3.89221	2.71301	1.7568	2.54688	4.36299	3.9349	5.12725	1.91244	2.3617		1.15094	1.70522	1.3179	3.21872	1.50557	1.04374	1.12696	1.4777	1.92576	1.77137		6.11479	3.94258	2.25601	2.86292	9.04789	5.35817
2.79948	6.54519	6.68297	6.43218	5.56386	2.47569	2.9689	4.86309	5.66306	10.8947		1.26875	1.7004	3.11814	1.14632	1.23492	1.98264	1.71201	1.77445	1.03086	1.42022		2.50045	3.89573	2.7475	1.77458	2.5322	4.36095	4.03356	5.16238	1.93739	2.33237		1.14633	1.69738	1.3134	3.29304	1.5174	1.03852	1.15304	1.46479	2.00853	1.8053		6.27497	4.01268	2.25733	2.84392	9.08074	5.44166
2.81624	6.69232	6.73354	6.49252	5.64237	2.45351	3.08097	4.87402	5.74783	11.0837		1.27598	1.70396	3.14767	1.14737	1.22803	1.9974	1.69753	1.75152	1.02557	1.42032		2.54253	3.89583	2.79786	1.78493	2.5692	4.35003	4.17478	5.43716	1.95101	2.33322		1.1517	1.70044	1.31114	3.35634	1.51191	1.03438	1.17964	1.4817	2.13844	1.83707		6.24396	4.12115	2.28596	2.87231	8.99109	5.53754
2.85443	6.85289	6.8153	6.48909	5.8114	2.5121	3.08738	4.9814	5.85893	10.9533		1.27729	1.69748	3.17018	1.14915	1.2031	2.0097	1.64374	1.76204	1.02621	1.42165		2.47271	3.93835	2.85255	1.78718	2.58282	4.29304	4.26414	5.5651	1.95943	2.34482		1.14787	1.71198	1.31874	3.39438	1.54517	1.04043	1.16232	1.49157	2.17947	1.87104		6.23302	4.19598	2.31624	2.95352	9.21762	5.63056
2.89698	7.25392	6.84098	6.49966	5.87836	2.46552	3.11734	5.07454	5.78986	11.0314		1.27672	1.71627	3.21574	1.14604	1.23032	2.02314	1.67723	1.78729	1.02862	1.42053		2.40092	3.93598	2.8998	1.79236	2.66227	4.24222	4.33208	5.59511	1.97072	2.3196		1.14698	1.72208	1.31827	3.44071	1.52617	1.03544	1.17188	1.46465	2.14778	1.86708		6.36209	4.29773	2.33606	2.94364	9.20386	5.7089
2.91454	7.34893	6.83294	6.58593	6.01933	2.49803	3.19999	5.1613	5.90214	10.9838		1.2722	1.73432	3.2194	1.14811	1.21829	2.03654	1.63648	1.7751	1.02877	1.41259		2.59957	4.01068	2.97557	1.82253	2.64308	4.27135	4.43543	5.6707	2.00103	2.26111		1.14753	1.72202	1.3165	3.48331	1.55513	1.02897	1.16342	1.52002	2.18806	1.89652		6.42411	4.40944	2.35272	3.03848	9.13967	5.80777
2.98627	7.74992	6.94102	6.54739	6.10339	2.50824	3.23344	5.23209	5.85716	10.9634		1.27774	1.73019	3.2524	1.14746	1.23073	2.04596	1.66647	1.7904	1.02843	1.40053		2.58915	4.04582	3.09224	1.85697	2.71107	4.34455	4.54252	5.84021	2.00774	2.2926		1.14497	1.70653	1.3217	3.49684	1.54457	1.04314	1.14524	1.51235	2.14574	1.93078		6.30478	4.47162	2.37952	3.12481	9.17337	5.89529
3.03318	7.83454	6.93056	6.64625	6.28261	2.6136	3.26826	5.34987	6.00736	10.9881		1.28146	1.73721	3.28454	1.14645	1.20684	2.0574	1.67911	1.79474	1.02939	1.40172		2.58237	4.06513	3.15803	1.85451	2.66151	4.57207	4.65198	6.00338	2.02775	2.33237		1.14558	1.70077	1.31778	3.51736	1.56347	1.04511	1.14007	1.51292	2.11086	1.98159		6.38274	4.59083	2.43168	3.11611	9.21588	5.96699
3.10552	7.99132	6.94353	6.69479	6.34253	2.57687	3.33757	5.43889	6.0711	10.9399		1.2744	1.75272	3.31266	1.14787	1.21904	2.0807	1.67874	1.761	1.02971	1.40277		2.51781	4.07322	3.1959	1.88694	2.75176	4.50869	4.6779	6.09105	2.05398	2.27136		1.14971	1.70428	1.32131	3.55839	1.5771	1.04086	1.15228	1.51253	1.8431	1.97931		6.48951	4.68011	2.43377	3.19225	9.29482	6.05546
3.16253	8.35636	6.99824	6.78451	6.40695	2.66614	3.33872	5.47805	6.11717	10.8143		1.26712	1.7523	3.34554	1.14856	1.25198	2.09434	1.68458	1.77483	1.02701	1.39912		2.52039	4.1174	3.2636	1.89727	2.71117	4.63282	4.8358	6.19148	2.06523	2.23855		1.14938	1.71397	1.3212	3.61156	1.58566	1.03331	1.14907	1.51937	2.11648	1.97855		6.468	4.78922	2.43275	3.17514	9.35227	6.14332
3.16626	8.57167	7.06891	6.7876	6.56064	2.60542	3.39478	5.58639	6.13661	10.9755		1.26906	1.76058	3.37593	1.15117	1.21505	2.10415	1.71944	1.79836	1.02698	1.39556		2.72783	4.13462	3.29441	1.89324	2.77768	4.5084	4.98035	6.26377	2.08561	2.24612		1.15034	1.71555	1.32505	3.64223	1.60052	1.04249	1.15238	1.47636	2.09375	1.97365		6.42774	4.8996	2.48331	3.1937	9.51962	6.22238
3.2336	8.68572	7.15878	6.79012	6.53702	2.6526	3.40854	5.67438	6.1674	10.842		1.27269	1.77042	3.38806	1.15394	1.21353	2.12367	1.68738	1.77371	1.03183	1.40254		2.65904	4.25084	3.35978	1.90555	2.81439	4.59405	5.15013	6.37887	2.09443	2.2331		1.15319	1.73415	1.32224	3.66796	1.59512	1.04021	1.16906	1.5368	2.03978	1.99075		6.54783	5.01929	2.48571	3.2383	9.53048	6.32216
3.29122	9.03629	7.26227	6.87105	6.52264	2.68202	3.4669	5.74106	6.20607	11.0616		1.27481	1.7768	3.40596	1.15532	1.24202	2.1366	1.67232	1.78305	1.03184	1.39048		2.80677	4.27299	3.4234	1.89803	2.81102	4.71452	5.26914	6.66097	2.11401	2.24236		1.15059	1.77419	1.32168	3.72649	1.61616	1.04022	1.17516	1.53069	2.01525	1.99015		6.51684	5.10548	2.48701	3.16762	9.39725	6.42758
3.33292	9.01089	7.31597	6.81149	6.69453	2.68239	3.59982	5.8165	6.21965	10.9216		1.26481	1.77104	3.43586	1.1563	1.21442	2.14411	1.87721	1.81898	1.02922	1.40458		2.81893	4.32214	3.49789	1.918	2.86853	4.77292	5.32995	6.69459	2.14023	2.2568		1.14537	1.80895	1.32319	3.75546	1.6335	1.04547	1.17888	1.56488	1.88935	2.01169		6.51182	5.20167	2.51502	3.25018	9.63414	6.52749
3.33956	9.23781	7.41948	6.88065	6.60346	2.75838	3.63276	5.85197	6.29072	10.935		1.26817	1.77365	3.47669	1.15534	1.23816	2.1517	2.16978	1.79699	1.02448	1.40905		2.59136	4.35884	3.50933	1.9461	2.90814	4.568	5.48486	6.68863	2.15025	2.1963		1.14626	1.79589	1.32407	3.81835	1.62256	1.04816	1.16589	1.55759	1.89012	2.03045		6.5807	5.3095	2.54416	3.29928	9.69342	6.61627
3.42214	9.51714	7.52943	6.97024	6.73987	2.75004	3.63049	6.00038	6.24221	11.0097		1.2756	1.79568	3.50879	1.15582	1.22019	2.16518	2.36013	1.77298	1.02899	1.39907		3.15428	4.36692	3.55518	1.95258	2.93701	4.72685	5.58706	6.75757	2.18655	2.17963		1.14376	1.7969	1.3315	3.87706	1.64209	1.03824	1.11698	1.59385	1.86424	2.06629		6.6345	5.42884	2.55899	3.26875	9.81293	6.72777
3.47038	9.67972	7.53022	7.02549	6.75576	2.80625	3.73937	6.05088	6.31725	10.9053		1.27053	1.8176	3.52525	1.15247	1.21006	2.18842	2.39256	1.78547	1.03071	1.39712		2.95402	4.39382	3.67512	1.94838	2.98432	4.76014	5.67669	6.81445	2.1936	2.16286		1.14109	1.77531	1.3334	3.90711	1.61944	1.03966	1.19833	1.54048	1.90801	2.06509		6.60652	5.54596	2.57477	3.37692	9.93027	6.81109
3.56369	9.58091	7.64682	7.03591	6.81739	2.83679	3.71235	6.17086	6.23393	10.955		1.27253	1.80469	3.55579	1.15028	1.23467	2.20342	2.49185	1.7727	1.02755	1.40577		2.69786	4.47279	3.70431	1.95518	3.09357	4.86841	5.84253	6.87526	2.22046	2.15619		1.14854	1.78794	1.33239	3.9038	1.61271	1.04409	1.18396	1.60152	1.8718	2.11956		6.62132	5.6499	2.62078	3.7247	9.81114	6.87539
3.58763	9.69395	7.65386	7.04267	6.92405	2.84048	3.82508	6.26679	6.32818	10.8067		1.27282	1.79724	3.57255	1.15103	1.21543	2.2241	2.51046	1.77134	1.02986	1.39751		2.98458	4.54125	3.73699	1.97708	3.11327	4.84644	5.96698	6.86841	2.25227	2.20974		1.13251	1.75162	1.33245	3.92405	1.60285	1.04545	1.14424	1.54537	1.89268	2.1256		6.67616	5.79027	2.64931	3.7646	9.90885	6.91838
3.62038	9.78704	7.76006	7.06671	7.06043	2.83309	3.81962	6.4176	6.26306	10.969		1.27087	1.84503	3.60774	1.14913	1.18763	2.24398	2.55536	1.77006	1.02813	1.38975		2.81569	4.57679	3.8279	1.99101	3.16803	5.02248	6.02733	6.84847	2.27392	2.28115		1.13203	1.74502	1.32855	3.96618	1.58733	1.04088	1.17008	1.60068	1.91998	2.11631		6.67503	5.91242	2.67654	3.8237	10.0411	6.99721
3.69761	9.90503	7.88268	7.07129	6.99741	2.85513	3.85591	6.38617	6.42457	10.8728		1.26654	1.87715	3.628	1.14918	1.20179	2.2582	2.64222	1.7939	1.02811	1.39725		3.21887	4.65128	3.90382	2.01468	3.19109	5.08291	6.21872	7.08342	2.29641	2.50444		1.12702	1.7619	1.33198	4.02009	1.58605	1.03485	1.17962	1.60623	1.81418	2.12102		6.7847	5.96929	2.68584	4.00058	9.96823	7.03368
3.7965	9.76501	7.86386	7.23297	7.09541	2.89811	3.99755	6.51773	6.32953	11.0044		1.26375	1.89796	3.66968	1.14679	1.23007	2.25373	2.60275	1.7618	1.02485	1.40456		3.53266	4.71546	3.98743	2.03995	3.28046	4.97579	6.31639	7.14499	2.32365	2.69364		1.14126	1.79226	1.33322	4.06477	1.60442	1.04362	1.15447	1.62625	1.87669	2.12793		6.75152	6.08667	2.71103	3.88021	9.9897	7.09566
3.8437	9.95006	7.90611	7.15657	7.37795	2.8849	3.99704	6.65752	6.48675	10.9437		1.26764	1.91003	3.68535	1.14547	1.21077	2.27204	2.65462	1.75844	1.02735	1.39892		3.23608	4.74404	4.00133	2.05237	3.30633	5.47977	6.47791	7.13107	2.35016	3.53786		1.14034	1.80729	1.33305	4.08778	1.61027	1.04453	1.14195	1.65484	1.75723	2.14597		6.77875	6.19912	2.75704	3.9975	10.1985	7.13593
3.91459	9.88592	7.88804	7.17202	7.51992	2.90657	3.95586	6.617	6.43764	10.8471		1.26153	1.90827	3.74565	1.14719	1.21839	2.28714	2.72558	1.8041	1.02855	1.40163		2.92067	4.80591	3.99821	2.052	3.31486	5.07775	6.54383	7.24652	2.38527	5.85345		1.13216	1.81194	1.34168	4.10728	1.61487	1.0392	1.13512	1.66196	1.7963	2.18974		6.77973	6.2629	2.77717	3.95588	10.0912	7.21194
3.96275	9.89313	7.90578	7.20468	7.41556	3.02643	4.09925	6.7335	6.51396	10.7843		1.25941	1.92264	3.78364	1.14724	1.2024	2.29619	2.69089	1.79215	1.0291	1.40316		3.00529	4.83721	4.02318	2.07105	3.37469	5.0167	6.62247	7.5241	2.40718	6.80901		1.13924	1.83485	1.3427	4.11668	1.61581	1.04506	1.17131	1.64432	1.81691	2.19151		6.81342	6.42394	2.77431	3.88028	10.3147	7.27437
4.06813	9.81428	7.99369	7.26886	7.50997	3.02515	4.11772	6.77459	6.5985	10.8501		1.26623	1.96467	3.79234	1.14483	1.21528	2.31814	2.77418	1.7594	1.02965	1.39895		3.14357	4.91058	4.06856	2.09056	3.42926	5.2415	6.77742	7.4204	2.45447	7.38797		1.14025	1.87329	1.34377	4.16117	1.61953	1.04945	1.1568	1.6708	1.89331	2.21326		6.79239	6.5082	2.84103	3.97174	10.4027	7.34363
4.12657	9.83485	7.99557	7.266	7.36226	2.99022	4.20137	6.8733	6.57421	10.8253		1.27558	1.9605	3.80547	1.14562	1.22297	2.33902	2.7746	1.7883	1.02621	1.40469		3.07014	5.00279	4.09268	2.10571	3.52246	5.13199	6.98509	7.57772	2.4525	7.68737		1.14191	1.86378	1.35458	4.23175	1.61621	1.04365	1.15706	1.67185	1.83447	2.1914		6.85257	6.60244	2.91519	4.14045	10.4503	7.37714
4.17263	9.91164	8.05322	7.26538	7.68634	3.05272	4.23819	6.92251	6.62807	10.6508		1.26494	1.99884	3.83715	1.1453	1.21464	2.3405	2.81435	1.76738	1.01862	1.40203		3.20012	5.07329	4.16471	2.14294	3.61003	5.09044	7.08961	7.76777	2.48609	7.947		1.15053	1.87255	1.35261	4.30685	1.62699	1.05151	1.16179	1.68466	1.84929	2.20492		6.94037	6.68655	2.97981	4.39656	10.4788	7.46438
4.25538	9.91672	8.02204	7.27465	7.59764	3.07942	4.29303	7.13905	6.49336	10.7374		1.26284	1.99475	3.8685	1.14547	1.20512	2.35182	2.81943	1.80425	1.02049	1.39712		3.46089	5.18409	4.2026	2.16546	3.63425	5.16059	7.09683	7.53021	2.49945	8.24151		1.1454	1.90434	1.35919	4.34254	1.64373	1.05421	1.15698	1.70333	1.95434	2.1916		6.91218	6.74153	2.99497	4.58321	10.581	7.49472
4.38955	9.92183	8.144	7.33315	7.44544	3.16201	4.23961	7.18263	6.62804	10.6688		1.25809	2.04032	3.90036	1.1443	1.21318	2.35863	2.83523	1.8002	1.03182	1.39148		3.28684	5.23704	4.22339	2.21616	3.70189	5.02141	7.19974	7.74105	2.52696	8.47715		1.13868	1.88249	1.35387	4.36287	1.63798	1.05501	1.14668	1.71949	2.04952	2.2237		6.94024	6.84405	2.98584	4.69612	10.7026	7.54935
4.45622	9.82678	8.19936	7.31805	7.68866	3.14204	4.36099	7.28459	6.70228	10.7827		1.2544	2.02341	3.96183	1.1425	1.22913	2.37217	2.8619	1.74158	1.03333	1.39037		3.58153	5.30431	4.24522	2.26177	3.78477	5.17776	7.34252	7.80961	2.57507	8.78172		1.13894	1.85463	1.3627	4.37345	1.62454	1.04958	1.15468	1.74136	2.21458	2.22789		6.96799	6.9185	3.02701	4.71117	10.7144	7.63002
4.49393	9.89736	8.17662	7.32216	7.57027	3.18932	4.35358	7.4061	6.66604	10.5524		1.25491	2.0324	3.9781	1.1422	1.2252	2.39832	2.86716	1.78172	1.03503	1.3945		3.77286	5.35385	4.24269	2.28128	3.78378	5.25985	7.3921	7.88835	2.59909	8.99652		1.13882	1.83738	1.36123	4.42751	1.62593	1.0469	1.16007	1.73124	2.13986	2.25716		6.95803	7.02127	3.08994	4.69401	10.9086	7.70061
4.58785	9.86401	8.21018	7.40231	7.78284	3.1393	4.40555	7.48677	6.60397	10.8153		1.26172	2.00926	3.99208	1.14137	1.21617	2.41025	2.79079	1.75678	1.03452	1.38361		3.48976	5.38353	4.29503	2.30997	3.8949	5.23211	7.43393	7.95238	2.61459	9.12465		1.14372	1.84765	1.35695	4.45611	1.62048	1.04426	1.15468	1.76533	2.38186	2.25785		7.046	7.06027	3.09908	4.75138	10.9356	7.7401
4.65692	9.73081	8.29046	7.4514	7.70766	3.25823	4.45045	7.39143	6.77288	10.8118		1.26577	2.04604	4.02613	1.14475	1.21436	2.42539	2.9887	1.77831	1.03452	1.38583		3.72241	5.40291	4.35052	2.31124	3.98564	5.2323	7.58086	7.85085	2.64971	9.27515		1.14075	1.84427	1.3608	4.47248	1.6288	1.04547	1.13351	1.76305	2.43489	2.32617		7.04258	7.1427	3.14495	4.83945	10.9238	7.76409
4.73558	9.91627	8.32038	7.45542	7.94906	3.28505	4.41528	7.47787	6.84926	10.7958		1.2537	2.05069	4.04231	1.14514	1.22655	2.44144	2.92564	1.78163	1.03661	1.39785		3.86001	5.4798	4.3991	2.35506	4.03839	5.24094	7.6557	8.0777	2.66946	9.42265		1.14136	1.85666	1.37	4.50134	1.65837	1.05117	1.1986	1.74757	2.41127	2.33301		7.07393	7.21278	3.18064	4.89119	11.1465	7.78299
4.80121	9.93758	8.3877	7.49126	8.09665	3.29955	4.57224	7.55406	6.80236	10.7273		1.25453	2.08118	4.05021	1.14732	1.23184	2.44465	2.97991	1.77045	1.03406	1.40498		3.92019	5.51851	4.47548	2.37455	4.05425	5.47473	7.68399	8.22242	2.7183	9.58784		1.13382	1.85076	1.35974	4.48227	1.66684	1.051	1.14983	1.76408	2.32678	2.40755		7.16612	7.25118	3.18113	4.84068	11.0107	7.87918
4.89046	9.82098	8.27702	7.51121	7.98958	3.28879	4.59106	7.61949	6.85095	10.6768		1.2575	2.07261	4.08377	1.14846	1.22877	2.46647	2.96702	1.77647	1.03506	1.41385		3.75187	5.64258	4.56642	2.4172	4.18996	5.51075	7.74789	8.14769	2.73784	9.69609		1.13775	1.84896	1.36191	4.49396	1.66837	1.05059	1.18727	1.78302	2.26151	2.45993		7.13801	7.33222	3.22378	4.95312	11.1612	7.88776
4.99054	9.83637	8.34322	7.45524	7.91952	3.38802	4.56228	7.73107	6.76273	10.7693		1.25614	2.05577	4.12104	1.14871	1.21579	2.48869	3.07348	1.76435	1.03541	1.41761		3.55027	5.67893	4.62713	2.48809	4.21774	5.21314	7.84183	8.14611	2.77383	9.67401		1.14806	1.8444	1.36206	4.5864	1.67969	1.05376	1.16631	1.80127	2.15641	2.53841		7.07102	7.39537	3.20901	4.91829	11.443	7.9584
5.08802	9.74166	8.34622	7.52467	7.79962	3.36383	4.68025	7.86256	6.83893	10.6681		1.25691	2.08274	4.13987	1.14638	1.21949	2.49727	3.03518	1.77077	1.03467	1.42125		3.60539	5.70068	4.71531	2.51933	4.17819	5.20624	7.91051	8.20341	2.79607	9.86138		1.14819	1.89733	1.36155	4.53143	1.67514	1.04983	1.15846	1.81503	2.09789	2.54395		7.086	7.4143	3.2462	5.1401	11.5486	7.99385
5.13783	9.87996	8.37406	7.51018	7.83745	3.43455	4.7319	7.81635	6.8791	10.7109		1.26193	2.08129	4.16163	1.14812	1.21547	2.51169	3.08561	1.7616	1.03146	1.42061		4.28139	5.77886	4.79712	2.56987	4.31304	5.58946	8.03247	8.1943	2.82462	9.92134		1.14231	1.8763	1.36901	4.54836	1.69529	1.05435	1.16006	1.81912	2.09651	2.52225		7.11076	7.45786	3.27381	5.37974	11.5006	8.03309
5.23168	9.79151	8.43914	7.58352	7.83444	3.41283	4.70339	7.99234	6.88105	10.4236		1.25847	2.10082	4.19222	1.14732	1.22307	2.52479	3.10019	1.79637	1.03374	1.42592		4.25035	5.86276	4.7971	2.64188	4.34798	5.48179	8.05983	8.10358	2.8724	9.8415		1.13528	1.87606	1.35759	4.57836	1.6945	1.05694	1.149	1.85058	2.06121	2.53665		7.16026	7.5062	3.28803	5.84283	11.5687	8.08486
5.35211	9.79216	8.42523	7.60281	7.99827	3.42973	4.75982	8.03075	6.91925	10.7205		1.25659	2.07015	4.20011	1.14441	1.23747	2.51801	3.03709	1.7837	1.03478	1.4218		4.0892	5.87635	4.83324	2.67033	4.53826	5.5689	8.10416	8.25134	2.9076	9.97537		1.13635	1.8704	1.35824	4.59458	1.69628	1.06304	1.14578	1.85094	1.94069	2.51863		7.17432	7.57622	3.31237	6.14227	11.4322	8.11112
5.46341	9.79118	8.46802	7.63823	7.78608	3.51362	4.73723	8.06795	6.93755	10.5836		1.25261	2.10353	4.21879	1.14541	1.22146	2.52282	3.0263	1.76112	1.03104	1.42882		4.21573	5.9714	4.92516	2.70745	4.51387	5.3409	8.21495	8.1457	2.93173	10.0539		1.1325	1.87016	1.36628	4.59735	1.71826	1.05899	1.15795	1.86789	1.9122	2.48409		7.12591	7.58126	3.36105	6.55234	11.5352	8.16601
5.51581	9.88938	8.54459	7.60968	7.96945	3.57	4.71392	8.09522	6.88641	10.7354		1.24888	2.08898	4.2621	1.1443	1.23972	2.54856	3.02542	1.78933	1.03391	1.43022		4.42617	6.03294	4.95204	2.7134	4.55987	5.51956	8.2834	8.40811	2.96904	9.9485		1.14018	1.89602	1.35924	4.64831	1.75168	1.06178	1.16857	1.85963	2.00163	2.52208		7.07236	7.61713	3.39607	6.63049	11.6701	8.19234
5.59568	9.67201	8.52367	7.5735	7.94637	3.63761	4.8202	8.26528	7.02117	10.7578		1.24738	2.0753	4.29667	1.14362	1.22406	2.55857	3.13622	1.79064	1.03625	1.43606		4.79154	6.02497	4.96495	2.77124	4.66939	5.11025	8.37218	8.18517	2.98526	10.0978		1.13744	1.89089	1.36463	4.74951	1.772	1.05976	1.1395	1.89524	1.91181	2.51286		7.16443	7.62095	3.4154	6.58176	11.547	8.21611
5.64975	9.81371	8.57939	7.69064	8.07042	3.59881	4.9058	8.28963	7.05285	10.8055		1.24636	2.12406	4.31048	1.14373	1.22404	2.57086	3.06762	1.78799	1.03871	1.42976		4.63896	6.18218	5.00957	2.8188	4.73066	5.27529	8.44666	8.33273	3.02688	10.1651		1.13248	1.90787	1.37284	4.7827	1.78783	1.05924	1.17511	1.90989	1.93935	2.55312		7.28547	7.70467	3.48524	6.70458	11.6521	8.24251
5.75471	9.76461	8.54466	7.73292	7.89029	3.64048	4.88149	8.4428	7.10689	10.5697		1.24056	2.13724	4.34297	1.14332	1.23049	2.58807	3.08927	1.78315	1.03445	1.42029		4.94598	6.22012	5.02759	2.86158	4.83799	5.39301	8.45681	8.31729	3.06041	10.2448		1.136	1.91231	1.37339	4.81357	1.82161	1.0615	1.14318	1.90168	1.95389	2.55813		7.28224	7.72578	3.52154	6.51969	11.7187	8.28463
5.81595	9.80457	8.56806	7.65308	8.1293	3.70109	4.91955	8.42952	7.06611	10.794		1.24686	2.1404	4.38567	1.1437	1.21864	2.59669	3.09515	1.7811	1.03319	1.41993		4.97027	6.24595	5.03984	2.90898	4.88723	5.4874	8.5915	8.21016	3.09579	10.0534		1.14717	1.90722	1.36007	4.8872	1.85426	1.06295	1.15566	1.91689	1.92041	2.57211		7.23662	7.73365	3.52974	6.53998	11.7865	8.3069
5.91615	9.74513	8.66271	7.738	7.97825	3.76589	5.02257	8.51126	7.08189	10.7085		1.23944	2.16306	4.40281	1.14616	1.23521	2.60633	3.11238	1.78518	1.03378	1.41613		5.04919	6.33664	5.14462	2.94672	4.95854	5.54763	8.62847	8.48393	3.14245	10.2539		1.14453	1.95051	1.37045	4.9151	1.86884	1.05503	1.14294	1.92625	1.96358	2.59126		7.30037	7.77854	3.57502	6.48976	11.8109	8.35303
6.02814	9.70031	8.70027	7.62796	8.12355	3.76333	5.01334	8.42842	7.2279	10.6476		1.23591	2.14151	4.41564	1.14893	1.19792	2.62742	3.12741	1.79915	1.03347	1.41498		5.03309	6.35972	5.22798	2.99321	5.07727	5.61351	8.67867	8.56196	3.16614	10.1936		1.1542	1.93316	1.37067	4.90646	1.87748	1.05292	1.16846	1.92883	1.94169	2.64893		7.29355	7.78533	3.58082	6.28118	11.8898	8.36625
6.13741	9.67205	8.65838	7.71498	7.93112	3.84248	5.04915	8.62084	7.12816	10.6742		1.24365	2.15071	4.42572	1.14942	1.2408	2.64412	3.11945	1.79531	1.03673	1.42202		6.40855	6.47561	5.23989	3.04213	5.17226	5.56459	8.71436	8.44733	3.2015	10.2762		1.15152	1.94905	1.36528	4.88294	1.8913	1.06444	1.14759	1.94126	1.86192	2.72434		7.30612	7.84623	3.52222	6.18795	11.747	8.41196
6.20428	9.74424	8.70788	7.70827	7.9903	3.86042	5.13553	8.68145	7.21256	10.4984		1.24857	2.1515	4.45973	1.14956	1.21896	2.66687	3.23962	1.77907	1.03716	1.41411		6.41663	6.5328	5.22793	3.09771	5.1446	5.59235	8.72367	8.63117	3.22274	10.1773		1.16105	1.92905	1.37303	4.87949	1.89114	1.05665	1.16383	1.9823	1.9586	2.82304		7.38899	7.85493	3.60467	6.13432	11.9047	8.41568
6.26829	9.72179	8.73955	7.61201	8.01566	3.82691	5.10315	8.7502	7.12849	10.6465		1.24398	2.17407	4.48144	1.15095	1.2303	2.67	3.26485	1.7938	1.03336	1.41842		5.95912	6.64653	5.20649	3.19782	5.3586	5.29775	8.80892	8.60806	3.26826	10.3208		1.16319	1.96613	1.36544	4.88146	1.88988	1.0571	1.15623	1.98567	2.04139	2.81865		7.40247	7.90829	3.71006	6.0153	11.741	8.4615
6.38485	9.8581	8.79902	7.64922	8.06329	3.94253	5.12261	8.78251	7.0256	10.6108		1.24646	2.15951	4.49884	1.14934	1.19766	2.66908	3.24852	1.76138	1.03339	1.41966		6.2194	6.58436	5.24329	3.21842	5.43791	5.34978	8.79676	8.88949	3.29567	10.2561		1.15806	1.97765	1.37582	4.94716	1.88857	1.05163	1.14958	2.00649	2.03535	2.87153		7.4432	7.89329	3.75526	5.89788	11.7219	8.47222
6.52435	9.73521	8.86787	7.78705	8.09044	3.90459	5.21456	8.7576	7.18178	10.7049		1.24721	2.14161	4.53757	1.14982	1.21574	2.6884	3.32006	1.79874	1.03215	1.41897		5.8471	6.57045	5.25181	3.25487	5.51716	5.56625	8.87038	8.95657	3.3201	10.2031		1.14363	1.97899	1.37043	4.93227	1.86196	1.04592	1.13294	2.04295	2.04838	2.8391		7.49842	7.92486	3.83219	5.66973	11.6647	8.50515
6.61043	9.81666	8.80505	7.84084	8.19516	4.01749	5.1739	8.90763	7.40043	10.5541		1.24585	2.16128	4.55791	1.14976	1.22245	2.69596	3.28294	1.76816	1.0366	1.40999		6.1293	6.61792	5.2539	3.2948	5.55139	5.5495	8.93397	8.68221	3.35013	10.2049		1.15004	1.99639	1.36845	4.9356	1.85843	1.04634	1.15707	2.04036	2.1039	2.83541		7.50236	7.94532	3.87604	5.51959	11.9874	8.51567
6.69687	9.77101	8.87152	7.81886	8.20937	3.99402	5.21681	8.96895	7.37345	10.3559		1.24348	2.15329	4.57797	1.14936	1.23258	2.70851	3.35648	1.8122	1.03835	1.4092		6.50297	6.65375	5.29336	3.32871	5.64872	5.66203	8.99972	8.91639	3.39082	10.2815		1.14594	1.99538	1.36735	4.92645	1.83277	1.05346	1.16781	2.03682	2.05769	2.84908		7.422	7.96441	3.9279	5.25387	11.9465	8.57118
6.77631	9.65343	8.87413	7.87952	8.13672	4.13668	5.25383	8.96117	7.45505	10.6645		1.24524	2.16567	4.58458	1.14879	1.20542	2.72066	3.2801	1.78174	1.03895	1.4043		6.69369	6.63027	5.30116	3.3521	5.75173	5.73962	9.06462	8.9673	3.41109	10.3199		1.1463	1.98697	1.36498	4.92905	1.81658	1.05635	1.15292	2.05008	2.04772	2.82853		7.5213	8.01586	3.93919	5.20662	11.8088	8.56424
6.91236	9.77209	8.87188	7.84558	8.31011	4.10277	5.35862	9.01384	7.31204	10.5927		1.24364	2.17187	4.59851	1.14791	1.22768	2.73885	3.34048	1.7888	1.04275	1.4077		6.50621	6.63523	5.32274	3.4339	5.83842	6.05416	9.1666	8.72988	3.45421	10.2502		1.14146	1.99023	1.37167	4.97674	1.80452	1.0532	1.17293	2.05594	2.02506	2.79908		7.52279	8.02528	4.01277	5.16279	11.7112	8.59303
6.99805	9.72676	8.89718	7.8116	8.18397	4.17721	5.32529	9.03151	7.2898	10.7439		1.23682	2.1365	4.62536	1.1469	1.22498	2.75042	3.33392	1.78553	1.04071	1.40543		6.93628	6.65936	5.32556	3.49886	5.94018	5.9039	9.18259	8.86635	3.48784	10.2878		1.14872	2.03993	1.37241	4.98328	1.78043	1.05321	1.17148	2.07176	2.06108	2.83148		7.4728	8.04481	4.03372	5.09086	11.749	8.61856
7.06122	9.6885	8.89776	7.91636	7.95767	4.1781	5.39917	9.11907	7.41522	10.6906		1.23814	2.10988	4.65263	1.14643	1.21666	2.75179	3.3775	1.80558	1.03667	1.40908		7.19985	6.72998	5.39985	3.5411	5.94498	5.86181	9.1899	8.92562	3.52196	10.1807		1.14608	2.04009	1.37485	4.92414	1.74165	1.04646	1.12193	2.08672	1.99045	2.85329		7.57683	8.08055	4.07562	5.10223	11.798	8.62888
7.15002	9.71843	8.96017	7.90064	8.30972	4.1888	5.52221	9.01788	7.48475	10.4347		1.23616	2.13241	4.6751	1.14733	1.22469	2.77087	3.32649	1.81827	1.03757	1.41273		7.50881	6.77102	5.39536	3.61043	5.93374	6.03244	9.19262	8.95823	3.54796	10.2337		1.1395	2.04162	1.37074	4.88439	1.71856	1.05879	1.16176	2.09949	2.04975	2.83845		7.49674	8.11827	4.1081	5.08084	11.9083	8.67104
7.22796	9.81146	8.96266	7.85849	8.36266	4.30684	5.51203	9.18034	7.41819	10.6075		1.23849	2.17849	4.69475	1.14612	1.22072	2.78848	3.38789	1.78059	1.036	1.40799		7.15436	6.81323	5.39403	3.6056	6.02791	6.07998	9.24476	9.04726	3.62439	10.2248		1.14266	2.06546	1.3737	4.90117	1.75047	1.05098	1.1578	2.11781	2.13768	2.88478		7.5715	8.12725	4.16228	5.13218	11.9643	8.66716
7.2494	9.62787	8.92293	7.85868	8.34912	4.37311	5.48152	9.12889	7.54891	10.5304		1.23586	2.16303	4.70692	1.14517	1.21139	2.78383	3.47875	1.80436	1.03441	1.41393		7.42814	6.8548	5.46307	3.66485	6.15426	6.26232	9.31271	9.08763	3.65599	10.2795		1.14823	2.06938	1.38185	4.92991	1.79043	1.05458	1.16373	2.0985	2.04682	2.88312		7.65899	8.15381	4.23632	5.08054	11.7629	8.68949
7.35897	9.53896	9.04677	7.92835	8.12884	4.33216	5.56315	9.28031	7.55907	10.3519		1.23652	2.16388	4.73086	1.14586	1.19972	2.78518	3.45726	1.81402	1.0393	1.41034		7.70277	6.89209	5.48428	3.7651	6.25274	6.03969	9.31409	9.19475	3.68143	10.2683		1.13917	2.11108	1.38169	5.01132	1.79704	1.05412	1.18813	2.14254	2.01911	2.89938		7.50112	8.19527	4.27653	5.1327	11.9724	8.74283
7.49229	9.65488	9.04974	8.01612	8.33375	4.43677	5.55812	9.34989	7.4515	10.5829		1.2337	2.13589	4.7572	1.14677	1.23432	2.79801	3.44375	1.78719	1.03799	1.41087		8.0362	6.9387	5.53869	3.8187	6.22922	6.34161	9.2643	9.01229	3.71299	10.0938		1.1359	2.11922	1.38144	5.00626	1.81675	1.06133	1.15893	2.16772	2.01927	2.98829		7.5321	8.1417	4.35206	5.02234	11.7589	8.77343
7.5313	9.68247	9.01314	7.91988	8.33036	4.4108	5.64208	9.32982	7.52893	10.4726		1.23999	2.15283	4.7783	1.14719	1.19934	2.81405	3.49324	1.81757	1.04115	1.41483		8.10066	7.01483	5.59531	3.94184	6.38654	6.33709	9.26208	9.23705	3.76	10.1504		1.14739	2.11777	1.38054	5.05664	1.82242	1.0629	1.16616	2.21872	2.04682	2.9908		7.74607	8.21421	4.46303	5.24188	11.8571	8.79735
7.60024	9.63482	9.09782	7.99522	8.27778	4.46144	5.70212	9.30842	7.56528	10.6399		1.2374	2.15867	4.80319	1.14915	1.22325	2.82074	3.46978	1.8126	1.03884	1.41566		8.51003	6.97925	5.59539	3.94357	6.52087	6.03389	9.40271	9.14483	3.7916	10.0921		1.14264	2.11154	1.3863	5.02333	1.80033	1.05902	1.16736	2.20727	2.06413	3.06595		7.58895	8.24938	4.59943	5.19144	11.925	8.86411
7.70366	9.71669	9.01577	8.00869	8.28627	4.58634	5.76598	9.37926	7.52109	10.625		1.23684	2.16888	4.82095	1.14986	1.22168	2.83919	3.44611	1.8145	1.03864	1.41724		8.55136	6.98477	5.62126	4.03776	6.48683	6.25955	9.46168	9.11876	3.83465	10.0741		1.13981	2.12362	1.38413	5.05169	1.75619	1.05234	1.17355	2.21882	2.08788	3.10717		7.78823	8.30821	4.65697	5.15732	11.698	8.85214
7.71117	9.65729	8.9749	7.9693	8.45904	4.59827	5.75988	9.39033	7.5648	10.7315		1.2362	2.18433	4.84392	1.15167	1.228	2.8575	3.44102	1.82289	1.03844	1.41572		8.2768	7.03456	5.68041	4.03056	6.59334	6.23365	9.43942	9.01388	3.86693	10.1707		1.13792	2.14949	1.37932	5.03029	1.73721	1.06099	1.15461	2.24393	2.08614	3.14604		7.82203	8.25358	4.8503	5.2613	11.7554	8.81611
7.83758	9.62557	8.9629	7.92917	8.30825	4.57425	5.77441	9.32529	7.49392	10.5706		1.23486	2.15959	4.86174	1.15387	1.20498	2.85072	3.53821	1.80542	1.04082	1.42182		8.23863	7.02579	5.72117	4.15593	6.64328	6.07203	9.48645	9.26608	3.89176	10.1154		1.13901	2.12852	1.38508	5.00257	1.73836	1.05021	1.13427	2.22563	2.03586	3.1438		7.72171	8.30751	5.00849	5.30821	11.7803	8.89919
7.87291	9.53188	8.98917	8.07874	8.24927	4.63872	5.82743	9.49747	7.58816	10.6472		1.23278	2.18935	4.87116	1.15439	1.22961	2.86049	3.58614	1.80555	1.037	1.42091		8.06895	7.05761	5.69866	4.16764	6.66022	6.09881	9.48298	9.03492	3.91121	10.0866		1.14102	2.13655	1.38648	5.00952	1.72981	1.05422	1.14394	2.26208	1.96407	3.15393		7.80389	8.33113	5.11202	5.42338	11.7259	8.88359
7.94467	9.75423	9.02011	8.02629	8.5221	4.74658	5.96143	9.40704	7.4461	10.6425		1.23233	2.19467	4.89586	1.15443	1.23174	2.86931	3.54886	1.80232	1.03641	1.41816		8.56066	7.11409	5.74997	4.23628	6.73591	6.22458	9.55989	9.27566	3.96233	10.1583		1.13737	2.13209	1.38794	4.97987	1.71599	1.05614	1.1384	2.26879	2.04468	3.14648		7.89495	8.36266	5.2523	5.47833	11.6149	8.92437
8.04507	9.5751	9.01476	8.06605	8.39273	4.68352	5.89658	9.49708	7.48514	10.6747		1.22675	2.17966	4.92443	1.1533	1.22429	2.88165	3.5337	1.79868	1.03565	1.41988		9.02635	7.1721	5.80169	4.32404	6.76878	6.05076	9.58424	9.2331	3.99294	10.2454		1.13606	2.10414	1.38329	5.01954	1.71719	1.04946	1.14338	2.286	2.02311	3.18162		7.81375	8.39188	5.32835	5.66904	11.6553	8.8258
8.06724	9.6902	8.92336	8.09438	8.37645	4.83735	6.00633	9.61163	7.59724	10.7415		1.22761	2.16463	4.94224	1.1534	1.22907	2.89501	3.56504	1.79146	1.03598	1.42059		8.89253	7.16096	5.85763	4.43744	6.8202	6.11656	9.59807	9.0961	4.01948	9.99424		1.13815	2.1275	1.38907	4.99658	1.72855	1.05883	1.11336	2.32566	2.114	3.13615		7.78665	8.38474	5.42454	5.61108	11.5848	8.83629
8.06049	9.67617	9.00309	7.91603	8.28591	4.85611	6.02697	9.6804	7.58156	10.5043		1.22312	2.17183	4.97151	1.15332	1.21083	2.91047	3.6468	1.81026	1.04032	1.41693		8.98994	7.20934	5.8723	4.48543	6.96845	6.21278	9.63872	9.15795	4.07047	10.0971		1.14611	2.16596	1.39184	5.03359	1.74927	1.0568	1.14226	2.34538	2.01874	3.17538		7.93886	8.42186	5.55151	5.7007	11.557	8.82983
8.18229	9.75201	9.04641	8.10707	8.47975	4.87254	6.01228	9.65592	7.72079	10.6426		1.2255	2.18317	4.98474	1.15349	1.20387	2.93769	3.63203	1.80247	1.03698	1.41864		9.38764	7.25246	5.90895	4.54079	6.99683	6.1483	9.66996	9.07734	4.08441	10.0468		1.14973	2.1568	1.3894	4.97685	1.7353	1.05386	1.14631	2.36059	2.03731	3.20711		7.97958	8.49685	5.62673	5.85645	11.6029	8.84816
8.25632	9.61162	9.06217	8.03697	8.57245	4.96913	5.9912	9.59478	7.801	10.6374		1.22594	2.20691	4.99809	1.15156	1.22181	2.94461	3.66382	1.79513	1.03822	1.41945		8.83028	7.25089	5.89237	4.61842	7.02569	6.25509	9.70226	9.39173	4.09538	10.083		1.15123	2.16922	1.38906	4.92234	1.75854	1.0593	1.10797	2.37526	2.08408	3.21175		7.91978	8.47605	5.64586	5.95614	11.5551	8.87491
8.25671	9.591	9.18589	8.2301	8.46766	4.98122	6.06617	9.71254	7.76485	10.6172		1.22428	2.17204	5.02733	1.15119	1.20927	2.95039	3.75439	1.76593	1.03671	1.41961		9.2113	7.28384	5.9124	4.69913	7.05631	6.0826	9.72827	9.25784	4.14583	10.0759		1.14598	2.1657	1.3911	4.99161	1.74134	1.06133	1.14166	2.39371	2.03577	3.23766		7.86375	8.44172	5.64314	6.06425	11.5918	8.89363
8.3616	9.6078	9.20924	8.19968	8.34026	4.93594	6.13166	9.66941	7.81583	10.6482		1.2213	2.20236	5.05305	1.14763	1.19562	2.95558	3.69541	1.78571	1.03674	1.41741		10.0184	7.27961	5.98624	4.76333	7.09381	6.03573	9.73613	9.02675	4.1724	10.1571		1.14604	2.20221	1.3906	4.99897	1.73707	1.06023	1.16985	2.41493	2.0811	3.23878		7.92481	8.47301	5.67169	6.2771	11.4715	8.85895
8.41329	9.65659	9.27818	8.16155	8.2228	5.08641	6.08776	9.68009	7.92149	10.6363		1.21852	2.21282	5.07043	1.14466	1.21691	2.96379	3.75362	1.79755	1.03892	1.4123		9.88483	7.23723	6.0014	4.79498	7.21267	6.00385	9.72419	9.33656	4.21356	9.99796		1.14789	2.23555	1.38247	5.05337	1.73254	1.05959	1.14163	2.41637	2.06306	3.27471		7.86503	8.56147	5.74789	6.22876	11.5295	8.88785
8.42634	9.67152	9.16152	8.13541	8.36147	5.14856	6.24493	9.76759	7.81903	10.4579		1.22273	2.21158	5.08133	1.14447	1.20934	2.97442	3.7392	1.7842	1.03239	1.41847		9.88992	7.38507	6.06598	4.87714	7.25996	6.1701	9.7784	9.09682	4.24685	10.1405		1.14413	2.24053	1.3924	5.08194	1.74134	1.04974	1.10357	2.42967	2.22994	3.33469		7.97659	8.52744	5.77735	6.52819	11.471	8.9201
8.48741	9.62115	9.27384	8.15239	8.43874	5.18187	6.24726	9.81943	7.89046	10.6403		1.22383	2.21843	5.11156	1.1447	1.20117	2.99007	3.74727	1.80657	1.03415	1.41946		9.21152	7.41612	6.06464	4.98023	7.28722	5.87818	9.79814	9.1845	4.29037	10.28		1.14545	2.231	1.38883	5.09672	1.74033	1.04793	1.16085	2.4619	2.37085	3.34804		7.98815	8.54844	5.79434	6.89144	11.4409	8.92679
8.61145	9.66498	9.31069	8.09506	8.30936	5.26814	6.2942	9.67714	7.84297	10.7154		1.2256	2.20369	5.11399	1.1435	1.20209	3.0076	3.72252	1.80729	1.03712	1.42019		9.56434	7.37943	6.08406	5.08665	7.37143	6.14696	9.79968	9.28778	4.329	10.2994		1.13789	2.25868	1.39478	5.12421	1.73781	1.05186	1.12566	2.47942	2.58521	3.42727		7.98372	8.52349	5.88319	7.2796	11.3675	8.92086
8.42791	9.65923	9.12239	8.12935	8.27355	5.30025	6.19241	9.86625	7.8914	10.6791		1.22497	2.21011	5.14773	1.1427	1.2227	3.01099	3.80672	1.79366	1.03714	1.42145		9.65265	7.44001	6.05135	5.17814	7.37523	6.01324	9.83982	9.20657	4.3506	10.2502		1.14486	2.26101	1.39671	5.13896	1.7441	1.0583	1.14461	2.50608	2.82444	3.46905		8.06329	8.60492	5.95309	7.33118	11.4485	8.96289
8.57541	9.61722	9.22818	8.13455	8.49461	5.33499	6.36026	9.86539	7.9423	10.7342		1.22809	2.21508	5.17915	1.14367	1.22521	3.0192	3.78756	1.77359	1.03809	1.4069		9.8784	7.50946	6.06831	5.21845	7.32351	6.03151	9.77206	9.05385	4.39169	10.315		1.14335	2.25816	1.38584	5.16849	1.71395	1.05286	1.13418	2.53865	3.06535	3.47623		7.98916	8.58547	5.95137	7.3972	11.4287	8.95993
8.59989	9.63575	9.2242	8.17351	8.38446	5.3987	6.31398	9.94442	7.98623	10.7147		1.23074	2.22257	5.20231	1.14294	1.21729	3.02561	3.76177	1.80812	1.04458	1.40637		9.80564	7.47255	6.09083	5.30027	7.3643	5.89111	9.78821	9.03365	4.42814	10.1544		1.13833	2.25459	1.39729	5.17779	1.71849	1.05488	1.14253	2.54179	3.23787	3.50625		8.09809	8.61001	5.94564	7.54509	11.3968	8.95206
8.64643	9.66188	9.17585	8.11663	8.63417	5.42953	6.32172	9.90907	7.80994	10.5387		1.23158	2.24011	5.22406	1.13909	1.21202	3.04107	3.76579	1.79454	1.04186	1.40112		10.2092	7.49988	6.10479	5.43501	7.49833	6.17306	9.84386	9.0334	4.46159	10.0761		1.14716	2.26155	1.39195	5.13309	1.72183	1.05463	1.13272	2.54337	3.25773	3.51448		8.03275	8.58116	6.09714	7.35294	11.3833	8.97257
8.63745	9.44287	9.21214	8.18678	8.71474	5.45729	6.41173	9.92333	7.88291	10.544		1.22649	2.21987	5.25614	1.13994	1.20192	3.04953	3.80957	1.79762	1.04259	1.40024		9.92903	7.53196	6.10291	5.50687	7.55183	5.93547	9.85238	9.12228	4.49855	10.0703		1.14717	2.24864	1.3912	5.16979	1.71186	1.0507	1.14806	2.58088	3.18758	3.48915		8.23573	8.68018	6.10599	7.39886	11.3855	8.97273
8.71682	9.59092	9.14771	8.14025	8.50531	5.56528	6.40495	9.86834	8.0965	10.5996		1.22364	2.22821	5.27818	1.13999	1.20654	3.06403	3.80052	1.81193	1.04242	1.39653		9.82519	7.56069	6.16096	5.51179	7.63427	5.7968	9.92172	9.05978	4.53396	10.1751		1.14907	2.25649	1.39294	5.23702	1.69621	1.05216	1.15008	2.58776	3.07506	3.51596		8.15648	8.59653	6.16264	7.29189	11.3544	8.97815
8.75458	9.7204	9.1486	8.26345	8.53014	5.5674	6.56097	9.9861	8.19415	10.7031		1.22163	2.23236	5.29357	1.13894	1.19848	3.06201	3.86212	1.7817	1.04117	1.39711		10.2207	7.59642	6.19022	5.61085	7.64402	5.76074	9.91056	9.00707	4.55496	9.97886		1.14482	2.27807	1.39553	5.23102	1.7075	1.05887	1.1666	2.61507	2.97875	3.53732		8.15551	8.50752	6.15389	7.29342	11.3427	9.01633
8.78949	9.58847	9.17381	8.16286	8.72788	5.54251	6.51822	9.88426	8.06526	10.6922		1.21947	2.25622	5.31449	1.13916	1.21896	3.07498	3.81909	1.79236	1.04061	1.38841		10.2034	7.61366	6.14408	5.64555	7.62836	6.27742	9.9068	9.15141	4.59846	10.032		1.14142	2.30109	1.3925	5.22992	1.73593	1.05814	1.18349	2.6383	2.93227	3.50427		8.12961	8.63866	6.21248	7.17915	11.3668	9.00079
8.76239	9.55391	9.024	8.22412	8.50576	5.6883	6.4645	9.92701	8.12371	10.5921		1.21853	2.24756	5.34285	1.14021	1.21426	3.09816	3.91063	1.79818	1.03822	1.38618		10.4712	7.65516	6.15359	5.67536	7.74124	5.85376	9.90903	8.94315	4.63725	10.2427		1.14317	2.29071	1.39478	5.20047	1.73484	1.05661	1.15083	2.65928	2.74058	3.55434		8.15525	8.63789	6.27474	7.14227	11.4492	9.03763
8.72397	9.71343	8.98473	8.19168	8.32111	5.80276	6.53264	9.81903	7.97132	10.649		1.22191	2.22291	5.36436	1.13922	1.21582	3.12363	3.82535	1.78314	1.04196	1.39119		10.5156	7.59919	6.14325	5.80243	7.76562	6.18946	9.87923	9.07663	4.69365	10.2818		1.14302	2.24895	1.39362	5.18629	1.72894	1.06532	1.14849	2.70367	2.52741	3.60617		8.28195	8.6293	6.35416	7.02709	11.3133	9.02535
8.82447	9.7929	9.12449	8.28688	8.47401	5.79034	6.46113	9.9807	8.07607	10.6269		1.2132	2.2387	5.38104	1.14123	1.22146	3.11603	4.00848	1.79872	1.03738	1.39526		10.5397	7.70024	6.14186	5.93691	7.75227	5.84997	9.87645	9.14068	4.72155	10.1283		1.1455	2.2916	1.40019	5.14501	1.74744	1.05685	1.16206	2.70021	2.48253	3.65209		8.28355	8.68112	6.4113	7.03899	11.4021	9.02625
8.85853	9.69802	9.05248	8.2616	8.51325	5.81986	6.52815	10.0043	8.14267	10.8086		1.1954	2.25242	5.39769	1.14014	1.21415	3.11106	3.88299	1.80598	1.03751	1.39836		10.3444	7.76967	6.18142	5.93755	7.77931	5.96133	9.94804	9.19843	4.76825	10.2052		1.15186	2.31498	1.39614	5.1035	1.75496	1.06451	1.15677	2.70216	2.4308	3.64363		8.179	8.52888	6.51733	6.98146	11.355	9.06752
8.96389	9.69385	9.06341	8.31193	8.39594	5.90129	6.60258	10.0122	8.12276	10.636		1.20583	2.24413	5.40205	1.14038	1.21478	3.11159	3.86856	1.79786	1.04254	1.39132		10.8272	7.82341	6.24282	6.01651	7.86131	6.03585	10.0563	9.19533	4.80138	10.4695		1.14623	2.33525	1.39793	5.10843	1.73713	1.06631	1.15468	2.72055	2.34262	3.68577		8.28519	8.71589	6.5213	6.84593	11.3357	9.07292
8.94501	9.65121	9.00973	8.29822	8.56018	5.97609	6.69676	9.99185	8.07965	10.5319		1.20873	2.24416	5.41537	1.14053	1.22913	3.11715	3.95238	1.82048	1.03903	1.39713		10.5118	7.92999	6.23877	6.10931	7.89155	5.79108	9.93061	9.46149	4.83268	10.1198		1.14672	2.33845	1.39962	5.07379	1.73753	1.0608	1.15916	2.7394	2.29399	3.72826		8.31874	8.66641	6.56785	6.87706	11.3545	9.04519
9.01118	9.75863	8.93457	8.27567	8.4917	6.04963	6.58007	10.0402	8.11862	11.0389		1.21024	2.24707	5.42595	1.14056	1.2378	3.13256	3.80037	1.81722	1.03947	1.40099		10.409	7.91333	6.2478	6.14867	7.80316	6.04899	10.0501	9.45353	4.88046	10.1748		1.14759	2.34328	1.39593	5.07963	1.73137	1.05876	1.13197	2.77682	2.31123	3.70046		8.35098	8.61788	6.60169	6.60701	11.2686	9.08458
8.92816	9.76738	9.0919	8.32426	8.47364	6.12234	6.71545	9.87401	8.24305	10.6271		1.21605	2.22719	5.43297	1.13945	1.21516	3.14168	3.88957	1.80619	1.03979	1.39498		10.2568	7.92212	6.26356	6.2314	7.92025	5.97203	10.0787	9.60024	4.9199	10.288		1.14851	2.32838	1.39361	5.11403	1.76937	1.0529	1.13111	2.79008	2.34509	3.70576		8.50118	8.81195	6.48258	6.48752	11.3416	9.07466
9.02253	9.71352	9.07522	8.2917	8.53256	6.19337	6.74743	9.91539	8.07549	11.0012		1.21057	2.21405	5.44166	1.14085	1.21336	3.13602	3.89882	1.79674	1.04295	1.40059		10.6426	7.9117	6.24249	6.34141	7.97816	5.98496	10.0305	9.58476	4.95362	10.2712		1.14662	2.34629	1.39797	5.19313	1.77145	1.07255	1.12089	2.80629	2.31329	3.73241		8.58815	8.74017	6.63093	6.54729	11.3615	9.12068
9.02446	9.60197	9.14142	8.35934	8.44498	6.26458	6.73013	9.84267	8.16004	11.0284		1.21118	2.20593	5.44918	1.14012	1.20053	3.1489	3.87777	1.78328	1.03876	1.39726		10.2639	7.94991	6.2217	6.35635	7.94212	6.04489	10.1317	9.66741	4.99373	10.1143		1.1518	2.36064	1.40055	5.23009	1.80077	1.06103	1.18026	2.81918	2.44916	3.80693		8.60326	8.72514	6.69721	6.48083	11.3043	9.12423
9.09389	9.79592	9.1612	8.22514	8.48604	6.21646	6.86489	9.89245	8.15676	11.0624		1.20758	2.24981	5.47768	1.14078	1.2222	3.16406	3.8106	1.81457	1.0368	1.39607		10.5939	7.9149	6.21556	6.36976	7.99308	6.09055	10.1713	9.41825	5.02302	10.2846		1.15216	2.38391	1.3939	5.24697	1.8203	1.06427	1.13577	2.83683	2.42054	3.84408		8.66809	8.69474	6.86189	6.57789	11.2676	9.1353
9.13018	9.75923	9.19658	8.35985	8.44134	6.35251	6.88418	9.88094	8.14199	10.6633		1.21025	2.25087	5.49713	1.1425	1.23434	3.17131	3.96597	1.83313	1.04031	1.39494		10.6183	7.96556	6.20438	6.4535	8.00954	5.97194	10.0945	9.48993	5.05214	10.1493		1.14152	2.38118	1.40756	5.27744	1.82541	1.06514	1.17064	2.88293	2.53456	3.73545		8.5537	8.7775	6.91851	6.40782	11.2647	9.14043
9.17594	9.5931	9.27218	8.27066	8.54821	6.31144	6.91758	9.86698	8.26681	10.9735		1.21719	2.27574	5.50445	1.14519	1.22843	3.19119	3.94452	1.81065	1.03912	1.38908		10.7248	8.04433	6.22252	6.56675	7.99702	6.02548	10.0129	9.41494	5.10342	10.129		1.14395	2.39074	1.40661	5.23663	1.84272	1.06147	1.17516	2.90172	2.54667	3.83791		8.5371	8.75794	7.02161	6.38568	11.2636	9.17068
9.21148	9.70011	9.23788	8.19774	8.57376	6.4324	6.93433	10.0046	8.21132	11.132		1.21473	2.26966	5.52891	1.14393	1.21218	3.21228	3.88546	1.82726	1.03827	1.39054		10.4757	8.0074	6.23673	6.5232	8.05066	6.14726	10.0346	9.68036	5.13034	10.2597		1.14279	2.39725	1.39756	5.28516	1.84805	1.06147	1.15554	2.89568	2.63682	3.90249		8.59467	8.69547	7.12925	6.64322	11.2625	9.16909
9.08484	9.84947	9.23675	8.3287	8.49201	6.36893	7.00979	9.95371	8.42264	10.7342		1.2182	2.24101	5.54266	1.14394	1.21751	3.22509	3.9581	1.81529	1.04497	1.38333		10.7318	8.09648	6.27191	6.63131	8.07864	6.15155	10.0328	9.49541	5.16686	10.3261		1.1438	2.4247	1.40781	5.29179	1.83916	1.05766	1.18873	2.93153	2.60421	3.94532		8.61096	8.74133	7.0884	6.49214	11.2016	9.19667
9.25876	9.77429	9.19966	8.36509	8.48323	6.58789	6.96324	9.93906	8.31093	10.8294		1.20782	2.24777	5.56193	1.14346	1.2118	3.22407	3.92115	1.82392	1.04556	1.38416		10.8277	8.09355	6.26788	6.70955	8.15037	6.33175	9.92486	9.72207	5.21127	10.1705		1.1521	2.43954	1.40293	5.30813	1.85228	1.06286	1.15848	2.95822	2.64902	3.95827		8.68571	8.76445	7.26324	6.57577	11.1279	9.16233
9.28528	9.72764	9.19056	8.34327	8.46021	6.46681	6.92141	9.99924	8.21845	10.7943		1.20614	2.26116	5.56793	1.14168	1.21006	3.22923	3.91256	1.83262	1.04677	1.3812		11.0329	8.0756	6.23453	6.65208	8.14019	6.28471	10.1275	9.47636	5.2456	10.0995		1.15202	2.44743	1.4052	5.27588	1.87102	1.05336	1.16478	3.00271	2.63655	3.98915		8.6334	8.7696	7.28367	6.70711	11.1501	9.20194
9.34787	9.68838	9.18653	8.30901	8.47902	6.56353	6.8456	10.0208	8.28111	11.4377		1.20536	2.28024	5.58094	1.14096	1.21511	3.24603	3.93836	1.83736	1.04521	1.3734		10.6507	8.14852	6.18863	6.70848	8.17767	6.48864	10.1776	9.70138	5.28691	10.3071		1.14776	2.4693	1.40999	5.25156	1.88771	1.05778	1.13807	3.00644	2.58107	4.02414		8.64128	8.81868	7.47455	6.79676	11.1602	9.27821
9.34995	9.60205	9.18255	8.29296	8.3408	6.67457	6.95308	10.0409	8.42284	11.1245		1.20535	2.2722	5.5819	1.14252	1.22306	3.2467	3.91976	1.79731	1.04578	1.37874		10.998	8.20387	6.1947	6.77133	8.15076	6.31532	10.0565	9.58252	5.32708	10.1557		1.14858	2.49	1.40223	5.21918	1.88527	1.06321	1.15685	3.04541	2.54889	4.03489		8.82968	8.77635	7.47612	6.80731	11.0113	9.21575
9.39121	9.82675	9.07505	8.43136	8.29854	6.60273	6.98494	10.0056	8.57723	11.1324		1.20367	2.25568	5.59136	1.14099	1.20551	3.26415	3.95819	1.76416	1.04384	1.37326		10.9072	8.21312	6.16157	6.79636	8.12363	6.1151	10.0534	9.47309	5.37492	10.0721		1.1463	2.4701	1.40217	5.18983	1.87818	1.05795	1.13285	3.07158	2.52388	4.06061		8.62988	8.82507	7.64538	6.93902	11.182	9.16674
9.36527	9.77714	9.13508	8.47407	8.27879	6.70968	6.93665	9.94766	8.36434	11.2058		1.20843	2.23665	5.60024	1.1411	1.21078	3.27463	3.91676	1.80975	1.04234	1.37199		11.2579	8.29105	6.1836	6.84547	8.21485	6.3569	10.127	9.36241	5.40491	10.229		1.13869	2.47737	1.406	5.18376	1.87774	1.06621	1.14763	3.08825	2.47429	4.05315		8.79112	8.827	7.69457	7.002	11.1778	9.16956
9.37643	9.70733	9.14203	8.38336	8.37294	6.875	7.06095	9.95726	8.34258	11.2393		1.21258	2.25124	5.5973	1.13938	1.22523	3.27362	3.92975	1.82274	1.04295	1.36665		11.2752	8.30515	6.20228	6.91549	8.24129	6.47318	10.0457	9.26375	5.45239	10.24		1.13711	2.49126	1.39953	5.16806	1.89876	1.05971	1.14261	3.10789	2.48601	4.05478		8.64251	8.81221	7.8096	6.92908	11.0973	9.28898
9.22899	9.68718	9.07226	8.50053	8.22397	6.89275	7.05114	9.99689	8.47701	10.9068		1.21204	2.29441	5.61036	1.13872	1.21236	3.27559	3.95352	1.80178	1.04298	1.37449		11.2464	8.36182	6.27869	6.93382	8.28303	6.38334	10.134	9.50441	5.48284	10.1666		1.14075	2.49029	1.40352	5.17485	1.9235	1.0616	1.15066	3.09631	2.40577	4.07574		8.6354	8.85012	7.96063	7.01595	11.1429	9.19338
9.41526	9.66189	8.97036	8.46781	8.22172	6.91571	7.05326	9.91648	8.5374	11.2105		1.2047	2.28214	5.6082	1.1407	1.22406	3.29038	3.91949	1.76925	1.04479	1.3702		11.168	8.36321	6.33057	6.97276	8.32322	6.47611	10.1885	9.51226	5.52544	10.2288		1.14915	2.47417	1.39748	5.15079	1.95082	1.0614	1.15349	3.10127	2.40239	4.10917		8.51732	8.84913	8.12283	7.0805	11.053	9.19625
9.44184	9.57099	8.91471	8.35746	8.2183	6.92294	7.11618	9.84191	8.51112	11.1264		1.20446	2.30818	5.62293	1.14043	1.22683	3.30307	3.95192	1.78212	1.04199	1.36559		11.0526	8.4087	6.33934	7.04055	8.29193	6.35726	10.0632	9.61837	5.55941	10.2745		1.13938	2.47817	1.40667	5.12872	2.00698	1.06678	1.16396	3.12934	2.39728	4.13809		8.85522	8.9	8.37969	7.30095	11.1082	9.26876
9.29067	9.79418	9.03523	8.47836	8.24223	6.95604	7.23103	9.77632	8.51783	11.2407		1.21101	2.28583	5.64138	1.13767	1.21997	3.30122	3.98249	1.78833	1.0455	1.3693		10.8749	8.46996	6.30872	7.0822	8.29073	6.3631	10.098	9.63011	5.61727	10.1266		1.14393	2.53222	1.39579	5.05751	2.09154	1.05806	1.16933	3.21647	2.39576	4.17506		8.91007	8.78937	8.48835	7.42311	11.1173	9.18116
9.40504	9.65155	9.03189	8.4554	8.19869	7.00261	7.21961	9.8089	8.53456	11.3777		1.21348	2.29873	5.64023	1.13775	1.21221	3.30419	4.05474	1.80232	1.04525	1.37006		11.0047	8.45808	6.28757	7.11149	8.27636	6.4269	10.238	9.28897	5.66114	10.2949		1.1357	2.55186	1.39484	5.09739	2.14832	1.05682	1.1662	3.23341	2.41311	4.25181		8.98443	8.79997	8.69347	7.60854	11.0693	9.14728
9.55518	9.81046	8.94271	8.36902	8.15924	7.0696	7.24349	9.61581	8.6286	11.4976		1.20634	2.28361	5.6622	1.13669	1.22634	3.31326	3.9331	1.76533	1.04336	1.3723		10.935	8.53926	6.30349	7.10128	8.31955	6.52128	10.2358	9.31109	5.71579	10.246		1.14276	2.57267	1.40556	5.12314	2.2545	1.05739	1.20283	3.19152	2.4798	4.31311		8.97328	8.7879	8.83734	7.6764	11.1636	9.209
9.50524	9.75536	8.90244	8.45274	8.17075	7.10132	7.33863	9.53318	8.61635	11.2684		1.2003	2.31369	5.68433	1.13613	1.20957	3.33187	3.9938	1.77536	1.0476	1.37474		11.4932	8.63091	6.32709	7.15445	8.25057	6.62015	10.2737	9.43484	5.75537	10.2413		1.13918	2.58249	1.39909	5.22889	2.29981	1.05836	1.13371	3.22749	2.62196	4.32839		9.06792	8.83077	9.00708	7.83291	11.1378	9.20749
9.63846	9.83758	8.92172	8.54798	8.16957	7.08515	7.4484	9.9207	8.65129	11.5405		1.19717	2.31098	5.69463	1.13734	1.21079	3.31845	3.9792	1.79215	1.04449	1.37521		10.6398	8.54015	6.34148	7.18482	8.40681	6.34863	10.3443	9.46395	5.81046	10.005		1.13981	2.5545	1.40524	5.28031	2.36452	1.0659	1.16098	3.25568	2.76576	4.41082		8.91897	8.86114	9.14269	8.0076	11.0429	9.16498
9.57152	9.73409	8.86143	8.49488	8.3593	7.26372	7.32721	9.85706	8.53651	11.2066		1.19699	2.29052	5.71426	1.13969	1.19451	3.3395	3.98189	1.77847	1.0367	1.36718		11.0059	8.6209	6.36062	7.20568	8.41803	6.45817	10.2886	9.44012	5.87212	10.1431		1.14682	2.57022	1.39037	5.36812	2.40209	1.06137	1.15957	3.26978	2.8879	4.39189		8.81907	8.77173	9.22532	8.00783	11.1381	9.21302
9.48709	9.83579	8.97227	8.42378	8.26027	7.29802	7.48175	9.79029	8.53706	11.4561		1.19539	2.34727	5.72305	1.14163	1.20894	3.34676	3.97838	1.80932	1.04042	1.36949		10.9742	8.69946	6.33648	7.22078	8.44407	6.53808	10.2943	9.44417	5.9211	10.1089		1.14698	2.60267	1.40236	5.39712	2.43658	1.06128	1.16828	3.3322	3.02836	4.44076		8.93593	8.88626	9.35268	7.8748	11.0795	9.1542
9.40627	9.87862	8.84569	8.49832	8.08984	7.35513	7.56602	9.57663	8.68823	11.3798		1.19588	2.32199	5.73872	1.14307	1.23569	3.36002	3.99509	1.77999	1.04413	1.36469		10.7088	8.67622	6.35724	7.2683	8.53096	6.4902	10.2741	9.51384	5.95599	10.0588		1.14463	2.58186	1.39737	5.42985	2.45515	1.0598	1.1599	3.33461	3.1015	4.47565		9.05092	8.78092	9.46804	8.08028	10.9674	9.20579
9.53667	9.68926	8.89693	8.50943	8.09968	7.35086	7.52669	9.98739	8.57569	11.3631		1.19735	2.31638	5.74656	1.14529	1.20115	3.37258	3.94346	1.78793	1.04229	1.36493		10.7727	8.77057	6.35415	7.33681	8.47836	6.59089	10.2741	9.58392	6.00707	10.0313		1.14417	2.57426	1.40267	5.45668	2.47374	1.06056	1.16328	3.32015	3.10316	4.50448		9.11627	8.85688	9.58906	7.96692	11.0814	9.18826
9.41709	9.66386	8.87924	8.473	8.12244	7.32192	7.57775	9.8938	8.69121	11.4298		1.20646	2.3325	5.75754	1.14613	1.22525	3.38785	4.02341	1.76898	1.04316	1.37003		10.7657	8.64352	6.35552	7.32489	8.53821	6.49617	10.3178	9.73831	6.05708	10.1306		1.14143	2.58279	1.40047	5.39071	2.45021	1.06918	1.16779	3.36295	3.17875	4.54303		8.88218	8.82458	9.71514	7.97207	10.9675	9.18064
9.63065	9.70958	8.93224	8.43385	7.85424	7.41176	7.60291	9.88643	8.6985	11.2698		1.20787	2.35588	5.74592	1.14568	1.20819	3.39844	4.05214	1.78507	1.04604	1.37156		11.0657	8.70944	6.36691	7.37837	8.48633	6.62594	10.3443	9.51031	6.10317	10.0981		1.14028	2.58132	1.39844	5.36118	2.47178	1.06664	1.18406	3.37396	3.17362	4.58757		8.88219	8.82399	9.78796	7.9399	11.0608	9.20718
9.41845	9.74001	8.97741	8.46476	7.80061	7.45459	7.74363	9.97974	8.67977	11.2776		1.21065	2.35358	5.75737	1.14338	1.22103	3.3995	4.00983	1.76693	1.04466	1.37207		10.8856	8.77712	6.38102	7.35971	8.50756	6.50296	10.3287	9.50167	6.15635	10.0953		1.14702	2.59236	1.39221	5.31742	2.48812	1.06961	1.15904	3.40284	3.1867	4.61832		8.9753	8.79725	9.83703	8.06002	11.0079	9.16621
9.44937	9.65704	8.98884	8.47337	7.78718	7.49017	7.67057	9.89696	8.78125	11.3623		1.20825	2.35794	5.7678	1.14298	1.21746	3.42809	3.98296	1.82115	1.04402	1.3653		11.5516	8.83912	6.38413	7.42005	8.46775	6.48243	10.3364	9.45877	6.1802	9.93839		1.13871	2.66925	1.384	5.3067	2.50963	1.07009	1.13135	3.41445	3.19883	4.64269		8.93823	8.91378	9.96803	7.70262	10.9767	9.20348
9.76182	9.80164	8.85305	8.64153	7.9073	7.55908	7.72942	9.87669	8.79314	11.4603		1.19719	2.35398	5.77702	1.14144	1.21955	3.42292	4.12258	1.79103	1.04432	1.36485		11.2164	8.87359	6.40081	7.46869	8.41717	6.45551	10.4048	9.60618	6.24742	10.1451		1.14861	2.70433	1.39362	5.25631	2.5156	1.07044	1.13455	3.43927	3.09191	4.66996		8.9668	8.89164	10.1201	7.75795	10.9353	9.1875
9.68234	9.8746	8.83983	8.58968	7.78349	7.57405	7.68629	9.91465	8.81782	11.3687		1.20044	2.32939	5.77936	1.14058	1.2023	3.43953	4.08929	1.79179	1.03956	1.36231		10.9565	8.98606	6.41197	7.51095	8.58273	6.21751	10.3576	9.49032	6.2929	9.9231		1.1523	2.68685	1.40151	5.25762	2.51156	1.0664	1.15452	3.44112	3.10909	4.6951		8.98344	8.90687	10.1619	7.8155	11.0298	9.21481
9.66897	9.70275	8.75117	8.49357	7.85379	7.40443	7.67615	9.86482	8.61917	11.4199		1.19208	2.33104	5.79903	1.13826	1.20074	3.43419	4.06527	1.77928	1.04116	1.36048		11.0367	8.85869	6.4195	7.50762	8.47353	6.564	10.2535	9.33713	6.33296	10.0012		1.1369	2.673	1.3988	5.23665	2.49559	1.06969	1.15519	3.47866	2.95287	4.82768		9.102	8.76801	10.1974	7.64425	11.0457	9.22089
9.67561	9.74451	8.87105	8.50198	7.69782	7.70355	7.80844	9.83063	8.6087	11.3228		1.18512	2.35472	5.80313	1.13894	1.19913	3.43953	3.99624	1.78984	1.03973	1.36251		10.8169	8.99399	6.44796	7.57285	8.51243	6.4093	10.3486	9.57009	6.41415	9.9544		1.14296	2.64318	1.38747	5.1619	2.45558	1.06419	1.14406	3.49962	2.43915	4.70789		9.02274	8.81653	10.2618	7.75603	11.0444	9.23151
9.68202	9.75837	8.83939	8.55314	7.74568	7.85072	7.80592	9.70465	8.67818	11.4753		1.17908	2.35515	5.81849	1.13695	1.18964	3.43282	3.99006	1.79498	1.04298	1.36011		10.8186	9.11247	6.45931	7.60143	8.52521	6.35435	10.2662	9.68327	6.4565	9.94369		1.14079	2.63282	1.40354	5.21291	2.43935	1.07107	1.13529	3.55916	2.79108	4.70777		9.07099	8.83992	10.2915	7.48875	10.9365	9.25633
9.76165	9.7123	8.85174	8.5788	7.83985	7.74238	7.84629	9.76379	8.67753	11.4039		1.18099	2.36376	5.84135	1.13736	1.1943	3.43262	4.06398	1.77474	1.03893	1.36225		11.1505	9.1122	6.44119	7.63621	8.58471	6.62249	10.2129	9.58376	6.49015	9.94751		1.14952	2.61516	1.39409	5.1454	2.40753	1.06832	1.15918	3.54632	2.71573	4.68938		9.16976	8.83581	10.26	7.53916	10.9753	9.21953
9.71222	9.76948	8.77387	8.49811	7.65015	7.58595	7.89863	9.51678	8.99108	11.4008		1.18166	2.3718	5.85231	1.13825	1.22469	3.45987	4.08846	1.75547	1.03814	1.35886		10.9912	9.20545	6.4948	7.66288	8.58326	6.4672	10.3151	9.46267	6.54128	10.0487		1.14498	2.65159	1.39888	5.13259	2.37737	1.06682	1.14594	3.56439	2.43363	4.92092		9.17813	8.85631	10.3196	7.53601	10.9475	9.2249
9.7646	9.7865	8.87401	8.57374	7.90528	7.92572	7.91899	9.53781	8.89118	11.375		1.17748	2.37645	5.87859	1.13952	1.22208	3.48772	4.15268	1.80034	1.03815	1.36019		11.1261	9.23283	6.48751	7.65018	8.59313	6.44656	10.377	9.46271	6.59157	10.0381		1.14542	2.68079	1.39532	5.19003	2.3447	1.06322	1.14244	3.57157	2.66585	4.84728		9.19889	8.84319	10.3715	7.67242	11.0446	9.25865
9.69078	9.75151	8.75385	8.55393	7.67468	7.85252	7.95422	9.4499	8.92169	11.3638		1.18453	2.33524	5.88983	1.13829	1.20015	3.48298	4.0803	1.80429	1.04282	1.35348		11.391	9.27154	6.46338	7.70044	8.63597	6.47692	10.2823	9.46353	6.62875	9.94577		1.13811	2.69031	1.39846	5.22039	2.34078	1.06906	1.164	3.5997	2.79802	4.85182		9.22072	8.89769	10.3948	7.53036	10.9388	9.2967
9.80884	9.78031	8.75441	8.4976	7.60449	7.71615	7.92073	9.3448	8.99979	11.3096		1.20002	2.36076	5.90359	1.13907	1.20105	3.48845	4.11146	1.79375	1.04152	1.35426		11.5482	9.22017	6.47214	7.72865	8.5869	6.61085	10.3207	9.36896	6.69074	10.0394		1.14581	2.7213	1.40189	5.19297	2.2984	1.06492	1.15814	3.65906	2.94589	4.90651		9.38083	8.87696	10.4467	7.42488	10.968	9.25992
9.86327	9.76561	8.76968	8.60789	7.70923	7.85749	8.03382	9.28695	8.90556	11.3807		1.21219	2.37352	5.91847	1.13838	1.18458	3.50641	4.25973	1.77451	1.04556	1.35482		11.0809	9.07603	6.47426	7.80735	8.61528	6.53181	10.4574	9.42098	6.74017	10.0007		1.14411	2.75642	1.39732	5.23053	2.27741	1.06321	1.12975	3.63886	2.93731	4.89762		9.41566	8.91495	10.4216	7.47962	10.9646	9.27623
9.84089	9.72739	8.75495	8.55775	7.60284	7.75876	8.09605	9.29614	9.02239	11.3436		1.21548	2.38331	5.91944	1.1392	1.18649	3.51984	4.19247	1.81249	1.04397	1.35309		10.9205	9.15806	6.43972	7.8045	8.75713	6.61631	10.437	9.5436	6.79502	10.1482		1.13969	2.77495	1.39624	5.24297	2.27067	1.06373	1.13271	3.63797	2.86853	4.8376		9.39707	8.89298	10.3909	7.51868	10.8836	9.27579
9.98286	9.76615	8.80775	8.52958	7.48143	7.79	8.07109	9.40427	9.05462	11.3895		1.21755	2.40705	5.93449	1.13508	1.22138	3.51032	4.19272	1.8158	1.04483	1.35287		10.8239	9.16328	6.45425	7.82576	8.75766	6.54134	10.363	9.57239	6.8412	9.95537		1.13689	2.78757	1.40895	5.30496	2.24349	1.06308	1.13812	3.67919	2.86312	4.89799		9.33398	8.82751	10.3926	7.68457	10.9457	9.24331
9.82346	9.70692	8.8396	8.55266	7.71794	7.78328	8.04234	9.30617	9.08329	11.3565		1.2208	2.38866	5.93318	1.13353	1.19131	3.52157	4.10745	1.79308	1.0429	1.35507		11.4089	9.39521	6.43145	7.82775	8.67432	6.24656	10.4371	9.45035	6.88594	9.88035		1.13949	2.791	1.39726	5.35482	2.25244	1.0694	1.11573	3.69852	2.88856	4.96673		9.26665	8.91135	10.3431	7.69704	10.996	9.30114
9.58254	9.68725	8.84708	8.57191	7.55679	7.94889	8.13362	9.32381	8.98305	11.2954		1.21918	2.36617	5.94612	1.13484	1.19631	3.53175	4.15136	1.8112	1.03805	1.35048		10.9975	9.41708	6.4187	7.91333	8.64598	6.41174	10.4299	9.42876	6.9307	9.80597		1.13794	2.80904	1.39821	5.3678	2.25005	1.06589	1.12564	3.62965	2.91411	4.89386		9.33728	8.81556	10.3511	7.91502	10.8706	9.22009
9.73601	9.86627	8.8598	8.61391	7.51801	7.86102	8.17844	9.28561	9.08333	11.2028		1.22412	2.38339	5.9537	1.13576	1.18788	3.53951	4.17576	1.81063	1.0449	1.35939		10.881	9.53329	6.43223	7.94571	8.63325	6.34205	10.33	9.58385	6.98685	9.81774		1.13779	2.84642	1.40924	5.38363	2.26842	1.06604	1.12128	3.64228	2.99687	4.85392		9.40834	8.8884	10.394	8.11615	10.8947	9.24449
9.69295	9.76288	8.77867	8.53211	7.54214	7.91409	8.18692	9.32175	8.99796	11.3072		1.22306	2.41433	5.95962	1.13598	1.1979	3.54867	4.22421	1.80852	1.0443	1.35623		11.4183	9.55465	6.44842	7.99707	8.66871	6.44534	10.4313	9.38307	7.00071	9.72511		1.13696	2.86781	1.40743	5.44329	2.26909	1.06391	1.14815	3.77666	3.18521	4.83765		9.21767	8.89003	10.3701	8.10153	10.9427	9.26193
9.70158	9.85809	8.90536	8.49088	7.4348	7.90781	8.27513	9.24252	9.23068	11.2457		1.21844	2.40466	5.96701	1.136	1.20038	3.56735	4.13025	1.77293	1.04112	1.35517		11.1404	9.43274	6.43798	8.05847	8.69858	6.19985	10.4564	9.80458	7.05234	9.82031		1.14067	2.84317	1.40887	5.45922	2.2894	1.06764	1.13615	3.80427	3.29006	4.86422		9.12086	8.85759	10.3483	8.35719	10.8363	9.23939
9.86416	9.93137	8.95734	8.53017	7.51156	8.10711	8.26685	9.29981	9.31731	11.1365		1.21026	2.43741	5.97912	1.13564	1.18146	3.56566	4.12668	1.80009	1.04098	1.35566		11.4862	9.50526	6.42248	8.02489	8.54421	6.05879	10.4625	9.52507	7.08885	9.73221		1.14287	2.90951	1.40204	5.50141	2.31108	1.05817	1.16122	3.76061	3.41943	4.81773		9.49311	8.97852	10.365	8.50102	10.9259	9.27224
9.86619	9.69455	8.94299	8.47336	7.47706	7.91423	8.26774	9.26614	9.3035	11.3508		1.19914	2.42965	5.99228	1.13442	1.2039	3.57039	4.13869	1.80056	1.0427	1.35154		10.7846	9.59913	6.44507	8.06263	8.65517	6.18903	10.4055	9.55676	7.13562	9.82056		1.14708	2.92878	1.41123	5.41286	2.34341	1.0755	1.12665	3.82286	3.51264	4.82592		9.3406	8.93209	10.3301	8.84643	10.9288	9.21508
9.73007	9.8312	8.97769	8.65728	7.55864	8.11564	8.38924	9.29258	9.20937	11.2592		1.19127	2.43086	6.00498	1.13483	1.20378	3.56569	4.15094	1.79623	1.04643	1.35129		10.866	9.63945	6.46586	8.13015	8.6601	6.17601	10.5149	9.5159	7.19526	9.79587		1.14495	2.94414	1.4159	5.34588	2.34328	1.06754	1.14975	3.80349	3.47888	4.74314		9.41921	8.91638	10.3226	8.91921	10.8614	9.24608
9.69269	9.84486	8.92264	8.69143	7.49608	8.03826	8.38149	9.51724	9.31988	11.3452		1.18267	2.42027	6.00399	1.13634	1.19214	3.5672	4.06736	1.78638	1.04402	1.34692		10.7747	9.60568	6.44775	8.08846	8.74603	6.29206	10.4842	9.50601	7.26614	9.89412		1.14494	2.92107	1.41202	5.30736	2.39859	1.06262	1.09971	3.80245	3.44216	4.75661		9.52661	8.92194	10.1791	9.1823	10.932	9.25929
9.70797	9.68788	8.76122	8.5622	7.24086	8.16838	8.33096	9.37542	9.29032	11.3615		1.1741	2.40806	6.01477	1.1368	1.21003	3.57465	4.12505	1.81924	1.04516	1.34825		10.6781	9.5711	6.4901	8.1723	8.68204	6.18233	10.3782	9.52382	7.3285	9.86583		1.14122	2.92786	1.39526	5.234	2.4074	1.07422	1.14051	3.80645	3.38903	4.75197		9.33874	8.87502	10.2287	9.31633	10.9413	9.23095
9.961	9.66862	8.82152	8.50464	7.56492	8.08888	8.38799	9.55788	9.21815	11.1357		1.17015	2.3983	6.01443	1.1351	1.21189	3.5768	4.14933	1.81147	1.04703	1.35178		10.9759	9.654	6.54539	8.17327	8.64934	6.21449	10.4651	9.68155	7.36589	9.80413		1.13876	2.93546	1.40095	5.11364	2.41871	1.07059	1.13653	3.88324	2.77753	4.70413		9.4267	8.91733	10.2574	9.34836	10.9591	9.27075
9.84736	9.85589	8.83299	8.5841	7.48615	8.05685	8.52385	9.51795	9.20336	11.2429		1.15981	2.46288	6.01854	1.13614	1.20354	3.58446	4.13495	1.80806	1.04496	1.34465		11.0977	9.61547	6.55241	8.18599	8.87667	6.37723	10.4514	9.63511	7.44817	9.84947		1.14099	2.917	1.41146	5.10537	2.38065	1.06672	1.15162	3.88728	3.15455	4.74536		9.31664	8.88127	10.2972	9.27961	10.9284	9.3193
9.9953	9.68482	8.94294	8.5882	7.47397	8.1232	8.50038	9.63922	9.24562	11.3209		1.1558	2.43422	6.02873	1.13619	1.30495	3.59002	4.16707	1.80212	1.04699	1.34296		11.1615	9.74534	6.51234	8.2276	8.93246	5.95144	10.404	9.58568	7.50333	9.80779		1.14407	2.90702	1.40609	5.01763	2.39583	1.0634	1.14518	3.89529	3.22193	4.69992		9.50341	8.922	10.2483	9.52154	10.8447	9.2817
9.9421	9.74121	8.77312	8.58513	7.44713	8.11063	8.48068	9.68514	9.45337	11.2507		1.15614	2.4459	6.03852	1.13526	1.22192	3.60539	4.22533	1.77562	1.04356	1.34661		10.7434	9.81627	6.51712	8.30772	8.866	6.45857	10.4652	9.75331	7.55704	9.84285		1.14461	2.90816	1.40515	4.98644	2.38814	1.06774	1.14818	3.92488	2.809	4.79412		9.65003	8.96293	10.2234	9.61819	10.8451	9.29722
9.89413	9.70627	8.78037	8.711	7.19565	8.10852	8.63728	9.74083	9.4537	11.2346		1.1539	2.47327	6.03734	1.13359	1.16985	3.61933	4.0961	1.80414	1.04121	1.34251		11.2834	9.80536	6.47365	8.32547	8.82095	6.28752	10.5444	9.78131	7.57554	9.85147		1.141	2.94997	1.41839	4.96993	2.37323	1.06975	1.15993	3.96633	3.08974	4.72119		9.58693	8.88783	10.2456	9.45192	10.8482	9.29053
9.94465	9.83862	8.76187	8.56659	7.44162	8.15705	8.65391	9.60975	9.41944	11.1383		1.15403	2.40245	6.04107	1.13397	1.19511	3.61561	4.14113	1.81464	1.04744	1.34084		11.2049	9.79283	6.48626	8.31378	8.83084	6.43927	10.5688	9.7815	7.60081	9.62186		1.13893	2.97908	1.41517	4.95554	2.3657	1.06584	1.13932	4.04217	3.12222	4.73315		9.56674	8.94235	10.2534	9.52206	10.8934	9.22383
9.8307	9.71694	8.81285	8.64804	7.32057	8.30958	8.5152	9.47079	9.56047	11.2045		1.16242	2.41595	6.07281	1.13212	1.21825	3.6262	4.2135	1.77405	1.04333	1.3486		11.2992	9.89408	6.50001	8.38734	8.71458	6.36041	10.5126	9.62757	7.60866	9.70871		1.14315	3.00832	1.42057	4.94667	2.36616	1.07271	1.13139	3.96091	2.74544	4.77543		9.50491	8.85776	10.2069	9.61109	10.8133	9.31711
9.87224	9.85628	8.72587	8.62819	7.32686	8.12816	8.57497	9.46517	9.57441	11.1621		1.16688	2.47227	6.08665	1.13092	1.19756	3.63246	4.21343	1.79722	1.04833	1.35116		11.4618	9.83146	6.55299	8.46986	8.94568	6.4681	10.5265	9.59539	7.65237	9.61821		1.13741	2.98192	1.41124	4.97912	2.35861	1.0649	1.12636	3.99429	2.97941	4.66935		9.47204	8.94829	10.1924	9.39727	10.829	9.31169
9.93817	9.76331	8.67928	8.6305	7.10474	8.26521	8.69786	9.53222	9.50478	11.2467		1.19	2.4613	6.09809	1.13115	1.19175	3.62431	4.20408	1.80081	1.04298	1.34389		10.7907	9.85174	6.58752	8.40378	8.77984	6.23215	10.4574	9.52054	7.69148	9.80547		1.14169	2.96667	1.41875	5.00381	2.28814	1.07002	1.11921	4.04819	3.01102	4.84514		9.42026	8.89457	10.1808	9.49135	10.829	9.28516
9.77944	9.86593	8.79629	8.5924	7.25642	8.18979	8.59375	9.61278	9.41988	11.2474		1.21232	2.48148	6.10322	1.13255	1.19545	3.62043	4.18041	1.80078	1.0405	1.3332		10.8053	9.93526	6.55382	8.44676	8.74522	6.2915	10.5447	9.42631	7.72072	9.63741		1.13802	2.9393	1.42086	5.02998	2.24381	1.06546	1.13368	4.02104	3.16327	4.88173		9.50182	8.91339	10.194	9.44202	10.8109	9.29484
9.99269	9.72455	8.72521	8.57672	7.31621	8.15149	8.60271	9.53106	9.35979	11.1789		1.22418	2.48342	6.10946	1.13405	1.19179	3.62534	4.11117	1.79946	1.03719	1.33671		10.8876	9.93562	6.63589	8.46577	8.89592	6.17728	10.6282	9.3599	7.74968	9.63661		1.14426	2.9624	1.41776	5.11634	2.18418	1.05578	1.12669	4.08853	2.7585	4.89015		9.74385	8.90381	10.1684	9.23123	10.8534	9.30935
9.7996	9.70429	8.55167	8.5755	7.16678	8.20082	8.67267	9.53593	9.68346	11.1242		1.22387	2.4738	6.11857	1.1363	1.1924	3.63929	4.16269	1.81458	1.04888	1.33955		11.4877	10.0089	6.64794	8.46798	8.75855	6.4999	10.5393	9.41607	7.74529	9.69352		1.14375	2.95175	1.41695	5.22704	2.13292	1.06828	1.16867	4.1005	3.25042	4.91805		9.82491	8.90089	10.1438	9.10655	10.739	9.26954
9.98211	9.82216	8.71399	8.58204	6.73443	8.38841	8.68875	9.43421	9.46977	11.2792		1.2235	2.43542	6.13452	1.13832	1.18205	3.64998	4.22687	1.81458	1.05006	1.33365		11.1399	10.079	6.61196	8.57207	8.85382	6.40561	10.4411	9.35857	7.79248	9.59057		1.13692	2.96404	1.41867	5.34435	2.08291	1.07172	1.16393	4.08357	3.45499	4.98076		9.57678	8.92202	10.0911	9.11717	10.814	9.2287
9.67311	9.64439	8.59836	8.60774	7.62797	8.25759	8.7318	9.47765	9.51692	11.0819		1.21976	2.49296	6.14584	1.13934	1.18414	3.65915	4.15647	1.79173	1.04993	1.33302		10.8491	10.0177	6.59028	8.6004	8.75692	6.38515	10.5425	9.3063	7.82749	9.76739		1.13871	2.95206	1.41486	5.16148	2.06854	1.07231	1.14168	4.16774	3.03427	4.90781		9.64537	8.80458	10.1822	9.29409	10.8024	9.25762
10.2193	9.6166	8.72125	8.60993	10.0283	8.22949	8.68052	9.47375	9.47884	11.2017		1.21375	2.48671	6.14923	1.14021	1.18118	3.64753	4.21635	1.80936	1.05225	1.33444		10.8981	10.1166	6.62918	8.60205	8.80542	6.28728	10.5585	9.38879	7.87498	9.69482		1.14827	2.96724	1.41444	5.4456	2.03516	1.07048	1.1303	4.12819	3.50787	4.93982		9.64419	8.89907	10.221	8.76638	10.6978	9.23322
9.76584	9.76293	8.6862	8.69842	7.91048	8.32767	8.71969	9.4759	9.67725	11.0723		1.20833	2.4847	6.16577	1.13833	1.20582	3.64968	4.13016	1.79277	1.04829	1.33219		10.5552	10.2061	6.60427	8.59444	8.86984	6.42785	10.5415	9.51467	7.89419	9.62845		1.14765	2.98574	1.41506	5.41744	2.02982	1.07211	1.1528	4.20025	3.54147	4.87949		9.63662	8.89201	10.0075	8.87806	10.7845	9.21657
9.96104	9.73657	8.77622	8.71992	6.75277	8.38524	8.76014	9.31779	9.6851	11.2127		1.20106	2.49708	6.17227	1.13847	1.21482	3.64506	4.20552	1.81646	1.04674	1.33029		10.8747	10.0137	6.59732	8.58944	8.90118	6.41164	10.592	9.56337	7.9592	9.57535		1.15069	3.0291	1.41409	5.47308	2.05017	1.06544	1.1081	4.22769	2.92071	4.90181		9.66108	8.90315	10.0786	9.08345	10.7949	9.20525
9.94677	9.68121	8.72081	8.57436	5.82431	8.48812	8.80054	9.38738	9.54644	11.2139		1.18737	2.51849	6.16917	1.13549	1.17865	3.64869	4.18766	1.80363	1.05056	1.33213		10.597	10.1106	6.58429	8.63941	8.95074	6.19445	10.5685	9.39451	7.96145	9.52478		1.14883	3.04154	1.41413	5.47307	2.06114	1.07098	1.13714	4.183	3.75026	4.86939		9.38451	8.83353	10.0555	8.97394	10.7778	9.15469
9.89282	9.94245	8.62915	8.71371	6.11103	8.44381	8.78357	9.26153	9.60296	11.124		1.17438	2.49637	6.17109	1.13448	1.18283	3.67596	4.21254	1.82095	1.0512	1.33359		10.9545	10.1427	6.57276	8.65996	8.89897	6.19075	10.574	9.52432	8.03892	9.43566		1.13977	3.07118	1.4176	5.43259	2.07125	1.07537	1.14636	4.20613	3.77078	4.84334		9.38235	8.89904	10.0456	8.91477	10.8043	9.21524
10.0458	9.77183	8.76395	8.66864	6.8578	8.47017	8.79307	9.26988	9.56095	10.9967		1.15971	2.535	6.1693	1.13483	1.19536	3.69452	4.29965	1.79075	1.05119	1.33375		10.9265	10.219	6.57885	8.70357	8.763	6.45772	10.553	9.57159	8.03188	9.45042		1.1496	3.06331	1.42126	5.38908	2.10548	1.06888	1.1291	4.24615	3.15999	4.89122		9.55441	8.84239	10.0584	8.88965	10.7328	9.21577
9.84099	9.78778	8.79697	8.71838	7.76184	8.33737	8.86543	9.16098	9.66625	11.1437		1.14657	2.53564	6.18554	1.13334	1.20087	3.69252	4.2367	1.82908	1.04934	1.33293		10.9419	10.1203	6.56493	8.73642	8.86924	6.2251	10.5245	9.46979	8.08323	9.4793		1.14508	3.07023	1.42229	5.30485	2.09336	1.06751	1.16767	4.26509	3.54231	4.90319		9.70003	8.84565	10.0534	8.73183	10.7541	9.19809
9.85133	9.84712	8.92467	8.70859	8.24052	8.47797	8.85535	9.23346	9.64943	11.0823		1.13953	2.54496	6.19048	1.13334	1.19771	3.69646	4.19962	1.8042	1.04608	1.32863		10.8149	10.1955	6.58294	8.72501	9.15217	6.46068	10.5639	9.46589	8.11953	9.42662		1.14201	3.07944	1.42196	5.23857	2.08358	1.07173	1.13145	4.31944	3.64364	4.93973		9.57499	8.8799	10.0273	8.83116	10.7673	9.19006
10.0893	9.82399	8.98785	8.68482	8.24427	8.5082	8.87608	9.21195	9.73726	11.095		1.13178	2.54391	6.19415	1.13254	1.19314	3.71618	4.22181	1.80382	1.04683	1.32608		11.3445	10.3279	6.6001	8.70153	8.9195	6.19164	10.5188	9.4285	8.1709	9.55445		1.14336	3.09752	1.42294	5.17601	2.03181	1.06763	1.12491	4.31364	3.11529	4.91444		9.6179	8.90539	9.94204	8.82389	10.7223	9.21309
9.9789	9.82666	8.72401	8.62508	7.94627	8.5633	8.92645	9.29287	9.71617	11.1016		1.12925	2.50248	6.19336	1.13118	1.20222	3.7488	4.26626	1.8154	1.04668	1.32217		10.984	10.1728	6.64732	8.80161	9.05187	6.3088	10.5115	9.29111	8.18683	9.46872		1.14474	3.10225	1.41973	5.09417	2.04131	1.06984	1.16115	4.36408	3.56869	4.89733		9.64289	8.78279	9.92616	9.05531	10.7732	9.20309
10.0755	9.78835	8.8688	8.67554	7.49765	8.38678	8.93638	9.29153	9.51141	11.0817		1.12449	2.51517	6.203	1.13165	1.18109	3.74924	4.21192	1.81903	1.04357	1.32416		10.9126	10.2675	6.65826	8.77755	9.01547	6.29211	10.5237	9.16444	8.2044	9.45241		1.13889	3.13134	1.41959	5.03352	2.05592	1.06922	1.15389	4.39004	3.5663	4.93103		9.7322	8.90152	9.86394	9.01505	10.7991	9.16537
9.82224	9.88227	8.87205	8.62778	7.30028	8.49153	8.95919	9.42417	9.68725	11.0031		1.12368	2.58175	6.21112	1.13247	1.17844	3.74158	4.19944	1.81833	1.04468	1.32077		11.6042	10.302	6.69425	8.75683	8.89802	6.35197	10.4617	9.20324	8.26628	9.48047		1.14262	3.12869	1.41709	4.99697	2.10071	1.0703	1.13774	4.38138	3.05648	4.87263		9.61009	8.9029	9.87423	9.1082	10.7833	9.18789
9.77746	9.87607	8.88411	8.56691	8.13468	8.46835	9.02711	9.37147	9.71912	11.0121		1.12993	2.57072	6.21718	1.13479	1.17559	3.73214	4.2355	1.79485	1.04673	1.32237		11.0481	10.3576	6.73414	8.82101	8.91086	6.423	10.4977	9.40211	8.29159	9.50784		1.13684	3.17983	1.42357	4.98046	2.1446	1.07024	1.18255	4.41444	3.44336	4.87518		9.75369	8.89505	9.84926	9.34611	10.6805	9.18892
10.2556	9.84404	8.79512	8.66889	8.11217	8.59242	8.97084	9.45884	9.77377	11.0265		1.13828	2.57698	6.21088	1.13703	1.18469	3.73846	4.15221	1.78249	1.04498	1.31998		10.7303	10.2962	6.73469	8.83473	8.99006	6.3302	10.4909	9.345	8.33994	9.5958		1.13725	3.23338	1.42653	4.94614	2.1903	1.07844	1.18202	4.42041	3.50497	4.88739		9.90417	8.89857	9.81936	9.18389	10.7683	9.15579
10.2089	9.77098	8.8551	8.64753	7.97581	8.51614	9.02228	9.46992	9.7209	11.0865		1.15258	2.58072	6.21143	1.13638	1.18042	3.7337	4.18939	1.79595	1.04733	1.32067		11.1846	10.4367	6.74071	8.82367	8.8952	6.61204	10.5676	9.35234	8.36567	9.48694		1.14226	3.2925	1.42529	4.93303	2.24788	1.0744	1.12839	4.42829	3.03858	4.87555		9.85221	8.91181	9.86434	9.30026	10.7255	9.17787
9.91614	9.95575	8.7554	8.59782	7.88497	8.4952	9.11629	9.41277	9.75887	11.0876		1.17089	2.58044	6.20757	1.14031	1.20584	3.73596	4.21201	1.79869	1.04316	1.32334		10.3166	10.3861	6.7508	8.89792	9.02727	6.21926	10.6469	9.54734	8.41657	9.6401		1.13841	3.30495	1.41893	4.89503	2.26958	1.06863	1.13227	4.47926	3.35537	4.84917		9.86347	8.95093	9.91406	9.36538	10.6849	9.1939
9.92967	9.81209	8.73386	8.58635	7.69167	8.4006	9.08262	9.38981	9.78882	11.0475		1.19307	2.57114	6.21596	1.14207	1.20009	3.73217	4.17001	1.81337	1.04457	1.32507		11.383	10.4297	6.79479	8.92148	8.8359	6.40429	10.6472	9.49484	8.43153	9.63169		1.14542	3.38568	1.42176	4.87308	2.3031	1.08083	1.15107	4.47377	3.48918	4.88184		9.88264	8.80097	9.924	9.68892	10.7231	9.17109
9.94051	9.74544	8.74318	8.57171	8.38437	8.6096	9.08727	9.32267	9.86297	10.9814		1.2032	2.5479	6.21591	1.14141	1.21347	3.75632	4.28367	1.81961	1.04896	1.32307		11.3055	10.3739	6.81367	8.9029	8.96522	6.40367	10.581	9.62482	8.4602	9.51118		1.14199	3.4508	1.42697	4.86591	2.32655	1.07117	1.16241	4.48756	3.0562	4.81084		9.7419	8.85042	9.91569	9.65376	10.7691	9.14355
9.93175	9.77833	8.79239	8.64165	8.22274	8.38419	9.04145	9.31748	9.69848	10.9996		1.207	2.62316	6.22231	1.14042	1.19167	3.7725	4.33575	1.8052	1.04448	1.32107		11.1675	10.3917	6.87178	8.91896	8.94598	6.31573	10.3881	9.32452	8.51269	9.53702		1.14705	3.43313	1.42841	4.86426	2.35266	1.07219	1.17484	4.48228	3.45781	4.9328		9.7427	8.85154	9.85955	9.57987	10.7263	9.17419
9.93215	9.73389	8.69932	8.67474	8.00263	8.50066	9.17458	9.38027	9.85884	10.9999		1.20315	2.60594	6.24	1.14114	1.1838	3.78492	4.37465	1.79905	1.04532	1.31935		11.2742	10.4424	6.92828	8.9936	9.16743	6.17474	10.3883	9.37294	8.57605	9.45881		1.14284	3.42873	1.4269	4.90828	2.37051	1.07013	1.166	4.52718	3.60643	5.01186		9.65323	8.91333	9.85844	9.78084	10.5947	9.15049
9.74964	9.75551	8.82515	8.70001	8.1693	8.60423	9.08469	9.19308	9.79606	10.906		1.19802	2.60728	6.25596	1.13891	1.19648	3.78202	4.3955	1.81293	1.04919	1.31853		11.0941	10.4322	6.90403	8.9336	9.17015	6.42272	10.5832	9.34282	8.54604	9.42343		1.15032	3.49676	1.4313	4.99212	2.3917	1.07394	1.19116	4.55725	3.16508	4.94251		9.84075	8.8704	9.74087	9.79752	10.7081	9.1809
9.90739	9.86263	8.797	8.60987	8.11416	8.67551	9.12438	9.30183	9.7668	10.9157		1.1933	2.61688	6.25089	1.13963	1.21471	3.78438	4.40349	1.82873	1.04848	1.31536		11.2852	10.3327	6.88931	8.99626	9.19686	6.52805	10.4473	9.31178	8.56308	9.46866		1.14265	3.59724	1.42318	5.09656	2.44241	1.0709	1.15037	4.58657	3.54426	5.03886		9.79078	8.8459	9.85789	9.7587	10.7033	9.22814
9.88209	9.77618	8.83434	8.57592	8.04737	8.56805	9.20952	9.13972	9.79985	10.9445		1.18738	2.645	6.25951	1.13902	1.22166	3.78234	4.46299	1.80754	1.05135	1.31269		11.0034	10.5359	6.93922	8.97611	9.23456	6.4272	10.4005	9.53362	8.58642	9.35924		1.14736	3.61144	1.42654	5.10759	2.50796	1.07506	1.15323	4.60716	3.63046	4.93935		9.95485	8.83465	9.7922	9.594	10.7489	9.17722
9.76515	9.67257	8.91677	8.81209	8.4319	8.62119	9.17365	9.16529	9.93538	10.917		1.18399	2.62071	6.27662	1.13849	1.22203	3.79799	4.45859	1.8061	1.04999	1.31057		11.4279	10.5518	6.95201	9.02814	9.13677	6.78526	10.6419	9.25083	8.66527	9.44489		1.1439	3.62389	1.42714	5.20894	2.58278	1.08206	1.14429	4.64156	3.67003	4.95269		10.0508	8.87496	9.79284	9.4801	10.7352	9.18387
9.73527	9.86767	8.80498	8.61403	8.18177	8.62029	9.09169	9.1552	9.9141	10.9233		1.17487	2.63495	6.28212	1.13746	1.20522	3.79422	4.40763	1.81337	1.04426	1.31189		11.0125	10.5485	6.94069	9.03339	9.18777	6.89485	10.5486	9.37715	8.72434	9.35445		1.14439	3.58991	1.42939	5.2522	2.65305	1.07287	1.15285	4.64153	3.64756	4.97548		9.97509	8.84262	9.80031	9.46026	10.7604	9.22082
9.72679	9.81627	8.83639	8.69381	8.21396	8.53016	9.15458	9.25117	9.88909	10.7107		1.16348	2.6603	6.29663	1.13563	1.21534	3.79351	4.41955	1.83653	1.04598	1.31209		10.9408	10.4608	6.93428	9.08006	9.2995	6.32081	10.4254	9.21521	8.72526	9.51857		1.14293	3.55846	1.42887	5.30297	2.72418	1.07049	1.14746	4.67735	3.71748	4.97973		10.094	8.84409	9.74174	9.22325	10.7049	9.19699
9.89609	9.85769	8.90781	8.61103	7.712	8.76322	9.22018	9.32572	9.77196	10.8555		1.15238	2.66735	6.29087	1.13644	1.22047	3.78494	4.52715	1.80425	1.04672	1.31169		11.5858	10.606	6.94337	9.13131	9.13362	6.45131	10.5826	9.3179	8.82582	9.4224		1.14488	3.5883	1.42897	5.26374	2.75745	1.07707	1.17203	4.68901	3.0894	4.92871		10.0924	8.86064	9.79031	9.57284	10.679	9.17385
10.0653	9.92792	8.8866	8.60893	8.33069	8.72221	9.15256	9.25226	9.94161	10.8197		1.14495	2.70433	6.29932	1.13671	1.19963	3.79606	4.4656	1.81093	1.05129	1.31687		10.6564	10.5655	6.94413	9.01231	9.16594	6.45043	10.5783	9.20539	8.79893	9.33508		1.138	3.57634	1.41978	5.31594	2.7882	1.07457	1.16211	4.68896	3.48994	4.92939		10.0148	8.83929	9.74522	9.15196	10.7795	9.20335
10.1247	9.76956	8.89664	8.63352	8.06857	8.76474	9.23961	9.28904	9.85394	10.8187		1.14214	2.68254	6.30519	1.13563	1.21897	3.80589	4.48159	1.82156	1.05281	1.3175		10.6273	10.533	6.95984	9.06129	9.04735	6.5162	10.3878	9.29175	8.82761	9.38383		1.14455	3.61838	1.42863	5.25402	2.80429	1.07287	1.18658	4.70805	3.63098	5.02632		9.74036	8.83975	9.77291	9.27993	10.6734	9.22479
10.0255	9.8752	8.85309	8.65076	7.93628	8.75693	9.30523	9.42202	9.93694	10.8986		1.14232	2.66002	6.3081	1.1352	1.19621	3.79498	4.40382	1.80516	1.05071	1.3187		11.014	10.5025	7.03309	9.14627	9.21853	6.46869	10.5072	9.11768	8.89884	9.37124		1.14105	3.6246	1.43749	5.22182	2.78394	1.0782	1.15787	4.72512	3.23664	5.02567		9.88827	8.76196	9.80204	9.45649	10.6689	9.17721
10.3174	9.68295	8.93409	8.65024	7.78995	8.6859	9.24412	9.12401	9.92281	10.803		1.14144	2.65409	6.31186	1.13478	1.19743	3.79561	4.381	1.82749	1.05139	1.31677		11.4416	10.4474	6.98287	9.07507	9.11982	6.49727	10.6913	9.52047	8.94183	9.3219		1.1413	3.60828	1.42581	5.17217	2.7626	1.07391	1.15894	4.76522	3.65618	5.06369		10.1072	8.87426	9.75922	9.02452	10.7438	9.23265
10.1523	9.8672	8.96089	8.68782	7.6827	8.63294	9.24142	9.17777	9.86634	10.9259		1.14809	2.69638	6.31108	1.13328	1.19572	3.79896	4.3539	1.81955	1.05303	1.31677		10.3915	10.5932	6.99525	9.06318	8.99816	6.52302	10.5364	9.09108	8.96853	9.26144		1.14512	3.68672	1.4329	5.12986	2.74457	1.0827	1.14255	4.77823	3.82514	5.00051		9.96181	8.77097	9.74866	9.0828	10.6402	9.17065
10.0517	9.8599	8.88574	8.69915	7.88697	8.579	9.35811	9.29776	9.88834	10.73		1.15735	2.7021	6.33525	1.13441	1.20528	3.81507	4.39879	1.82191	1.05049	1.31308		11.0791	10.4827	6.96077	9.18798	9.25005	6.70346	10.5387	9.25394	9.01137	9.38187		1.14773	3.67823	1.40379	5.05807	2.72884	1.07471	1.18399	4.77665	3.95137	5.00134		9.97775	8.75982	9.71221	9.11211	10.6366	9.2024
10.2662	9.77101	8.93297	8.69951	7.83261	8.66438	9.31154	9.36544	9.96005	10.8293		1.17856	2.70882	6.34439	1.13263	1.21886	3.82791	4.32182	1.82635	1.05194	1.31252		10.7786	10.4898	6.944	9.10775	9.30654	6.63396	10.7118	9.09656	9.09356	9.3858		1.14643	3.71577	1.42619	5.04578	2.70678	1.07306	1.14911	4.75776	4.08296	4.98265		10.08	8.77439	9.7859	9.07424	10.6339	9.20652
10.0378	9.83308	8.87305	8.716	7.68842	8.71681	9.30739	9.367	9.93688	10.7199		1.189	2.7449	6.34722	1.13254	1.18456	3.83144	4.31811	1.80991	1.05	1.31135		10.9735	10.6125	7.00492	9.13703	9.02609	6.44716	10.6716	9.15189	9.09176	9.35859		1.14541	3.71319	1.42456	4.98797	2.68405	1.06439	1.13847	4.82468	4.20201	5.03778		10.1858	8.8727	9.72749	9.00527	10.6303	9.18161
10.0252	9.68552	8.93143	8.6839	7.53174	8.59354	9.38834	9.29037	9.99589	10.7897		1.18904	2.76262	6.35879	1.13217	1.18065	3.84218	4.3713	1.80843	1.0537	1.31328		10.5717	10.6001	6.99364	9.24145	9.10006	6.47637	10.5981	9.29831	9.14367	9.4637		1.13786	3.72747	1.43201	4.95321	2.65677	1.0693	1.1404	4.85441	4.11732	5.05469		10.1051	8.79261	9.70595	8.83548	10.6362	9.19486
9.99209	9.75756	8.88655	8.7332	7.71741	8.95095	9.36832	9.54698	9.92827	10.6633		1.1883	2.70339	6.35581	1.13078	1.18846	3.86337	4.37687	1.78359	1.05239	1.31463		11.2878	10.5302	6.97691	9.24867	9.29917	6.5187	10.6771	9.10211	9.09812	9.44348		1.1407	3.72881	1.43644	4.92845	2.62659	1.06912	1.15214	4.89198	4.26494	4.99521		10.216	8.86011	9.71985	9.21609	10.5954	9.18304
9.92631	9.85008	8.98981	8.65815	7.39608	8.744	9.48455	9.58139	10.0412	10.6204		1.18671	2.69201	6.3646	1.129	1.1972	3.86215	4.40335	1.83031	1.04897	1.31596		11.2955	10.5646	6.9768	9.17535	9.32458	6.73367	10.7331	9.16761	9.14895	9.32699		1.14136	3.72844	1.44726	4.8858	2.6165	1.06533	1.14458	4.86019	4.27478	5.03751		10.1148	8.81377	9.67514	9.05342	10.5612	9.19347
9.92717	9.82562	8.93337	8.70967	7.60663	8.91842	9.50585	9.64992	9.75173	10.7682		1.18391	2.77064	6.34453	1.12819	1.20854	3.86876	4.34442	1.8022	1.04568	1.3171		11.1168	10.6845	6.97095	9.21443	9.29555	6.5273	10.6958	9.19232	9.17239	9.49233		1.13808	3.71094	1.45484	4.87696	2.59408	1.07395	1.15681	4.85923	4.38856	4.9362		10.2102	8.8245	9.65741	9.11262	10.6933	9.21067
9.9553	9.77915	8.92939	8.66736	7.31646	8.75495	9.48046	9.64589	9.98243	10.7446		1.18086	2.76329	6.35994	1.12882	1.19038	3.87086	4.30433	1.80957	1.04569	1.31673		11.3378	10.6804	6.97637	9.29032	9.27353	6.67508	10.786	9.18576	9.12079	9.30044		1.13953	3.71646	1.45211	4.86436	2.57084	1.07025	1.1423	4.90831	4.46128	5.00174		10.0376	8.80501	9.66711	9.11703	10.6239	9.22071
9.99756	9.71241	9.0209	8.6551	7.77352	8.70716	9.41459	9.60328	10.0308	10.663		1.17843	2.7805	6.35623	1.12899	1.20283	3.87458	4.30378	1.81441	1.04896	1.31532		10.4603	10.7432	6.99415	9.25578	9.40696	6.58736	10.7422	9.0598	9.17905	9.37839		1.13844	3.72623	1.45833	4.86654	2.54836	1.07898	1.14588	4.92564	4.30053	5.00366		10.3239	8.84403	9.7015	9.11431	10.6022	9.1843
9.89796	9.82056	8.99558	8.61102	7.4002	8.65014	9.45422	9.59734	9.91065	10.6656		1.17561	2.8062	6.3567	1.12793	1.22481	3.87547	4.34396	1.81793	1.0509	1.31567		10.6231	10.8224	6.949	9.29562	9.16428	6.27612	10.6411	9.12506	9.15719	9.40064		1.14029	3.68634	1.45499	4.84513	2.53065	1.07796	1.17196	4.96659	4.38208	4.96974		10.1803	8.76247	9.72165	9.09827	10.6278	9.23
9.9966	9.82266	8.99046	8.67951	7.25662	8.78518	9.46572	9.37804	10.0686	10.7216		1.17286	2.76786	6.36734	1.12594	1.19011	3.87219	4.31917	1.80961	1.05262	1.31417		10.5611	10.6957	6.93649	9.36548	9.27812	6.6325	10.6454	9.14386	9.21612	9.32713		1.1353	3.70536	1.46188	4.86181	2.48591	1.07354	1.15712	4.91213	4.33859	4.99054		10.1444	8.7534	9.64674	9.27544	10.5777	9.23597
9.93091	9.91312	9.04883	8.67549	7.63713	8.69569	9.50255	9.32128	9.89315	10.7022		1.17346	2.74276	6.37777	1.12607	1.19568	3.88416	4.2808	1.78914	1.05553	1.30801		10.636	10.7681	6.99271	9.35542	9.16818	6.65204	10.6921	9.2352	9.21615	9.39076		1.13626	3.71884	1.4582	4.85893	2.45501	1.08051	1.15783	4.9246	3.61535	4.94065		10.4071	8.79344	9.72674	9.29789	10.6379	9.24458
9.71853	9.79341	9.03931	8.55863	7.90362	8.81483	9.39079	9.34307	10.13	10.6896		1.16972	2.82043	6.39001	1.12729	1.19447	3.9043	4.33471	1.81141	1.05046	1.30846		11.0029	10.7049	7.04183	9.34585	9.30773	6.5259	10.6575	9.22728	9.23934	9.38851		1.1336	3.70004	1.45279	4.86998	2.41511	1.07014	1.13202	4.99674	4.15006	4.96705		10.1234	8.79456	9.6774	9.22726	10.6263	9.27377
9.95366	9.6925	8.97873	8.63856	8.22181	8.70707	9.50634	9.24316	10.1743	10.6059		1.17134	2.82716	6.3952	1.12734	1.19742	3.91767	4.37792	1.81529	1.04866	1.30919		10.9342	10.8	7.06498	9.4003	9.28886	6.51335	10.6396	9.24056	9.27967	9.33721		1.13829	3.7197	1.46428	4.8754	2.37996	1.07368	1.13644	4.96937	4.26113	4.96989		10.4253	8.89505	9.7267	9.61598	10.6155	9.29667
9.9422	9.67872	9.088	8.73502	8.04453	8.86096	9.36061	9.29356	10.2034	10.6652		1.17305	2.83355	6.40248	1.12644	1.23157	3.92009	4.34368	1.80334	1.04927	1.30941		11.3566	10.8196	7.05433	9.40825	9.46286	6.64024	10.6342	9.19136	9.26676	9.30545		1.1323	3.73268	1.46803	4.89824	2.35229	1.06981	1.14635	5.00582	3.71393	5.09167		10.2726	8.79256	9.73955	9.62572	10.6253	9.26169
10.0514	9.69448	9.05117	8.59505	7.46768	8.91563	9.40981	9.06408	10.0922	10.5634		1.17997	2.80887	6.39871	1.12724	1.19249	3.91914	4.23646	1.81794	1.04704	1.30742		10.3283	10.7604	7.06702	9.44855	9.40451	6.59015	10.6035	9.41083	9.24448	9.33125		1.13532	3.67369	1.45803	4.94144	2.34752	1.06447	1.15593	5.03435	4.20463	5.06635		10.7119	8.79134	9.77589	9.54233	10.6122	9.20965
10.03	9.86184	9.05429	8.70309	7.71643	8.61304	9.56151	9.17623	10.0867	10.6863		1.18142	2.79163	6.41247	1.12715	1.18022	3.91789	4.19486	1.77962	1.04766	1.3049		10.484	10.7539	7.04252	9.49638	9.44125	6.43528	10.6093	9.18014	9.30973	9.32786		1.14375	3.73601	1.46918	4.98021	2.33595	1.07276	1.14067	5.04387	4.21263	5.01159		10.5371	8.72348	9.7323	9.70405	10.6272	9.27173
10.0215	9.75328	8.94505	8.75593	8.10188	8.78326	9.39225	9.09104	10.1604	10.6587		1.17803	2.76217	6.41978	1.12837	1.20741	3.9211	4.28817	1.82295	1.0507	1.30496		10.5301	10.8737	7.03387	9.50009	9.10775	6.65653	10.6437	9.35007	9.30078	9.34303		1.1336	3.77792	1.46519	5.00881	2.32624	1.08444	1.18684	5.06032	3.66412	5.04095		10.579	8.81135	9.71971	9.71052	10.6712	9.2576
10.0485	9.67672	9.09235	8.75633	8.05669	8.94277	9.28601	9.16399	10.1651	10.5716		1.17936	2.8525	6.44397	1.12638	1.19164	3.92977	4.39044	1.80983	1.05331	1.30409		10.5214	10.82	7.04141	9.45226	9.34791	6.54006	10.6786	9.30027	9.30268	9.4111		1.13932	3.7758	1.46267	5.04939	2.29858	1.08102	1.16406	5.1003	4.05031	5.02067		10.5079	8.77323	9.6937	9.63367	10.6654	9.2882
9.96256	9.81632	8.97271	8.6654	7.74773	9.1292	9.4213	9.30137	9.95965	10.5645		1.17684	2.86012	6.45864	1.12524	1.203	3.93933	4.3518	1.81095	1.0568	1.30569		10.599	10.7108	7.0183	9.55973	9.1545	6.89327	10.7071	9.2305	9.41179	9.48161		1.13098	3.78153	1.46221	5.11051	2.28824	1.07753	1.17311	5.08854	4.12439	5.05937		10.6534	8.71701	9.70485	9.653	10.6215	9.28411
10.0188	9.7488	9.02336	8.80645	7.92536	8.87935	9.46036	9.16041	10.141	10.6885		1.17138	2.86859	6.45672	1.12603	1.19749	3.9641	4.26776	1.82713	1.05387	1.30275		9.91272	10.8792	7.01215	9.60379	9.25265	6.57769	10.7314	9.32245	9.44452	9.37781		1.13543	3.79323	1.46076	5.19333	2.2765	1.07608	1.16624	5.12054	3.55272	5.01975		10.5771	8.79957	9.7243	9.77119	10.5719	9.258
10.1162	9.814	9.1179	8.73288	7.99571	8.96746	9.2892	9.10572	10.1232	10.6316		1.16694	2.86392	6.45834	1.12692	1.18756	3.97768	4.30185	1.81153	1.05579	1.30132		11.0067	10.8307	7.02221	9.58207	9.17087	6.69819	10.7806	9.3101	9.43479	9.36851		1.14609	3.78425	1.46176	5.17538	2.24868	1.07698	1.16138	5.1613	3.91055	5.04513		10.4853	8.72679	9.73646	9.7664	10.6084	9.27792
9.84791	9.69218	9.03373	8.76978	7.67269	8.79633	9.35131	9.03068	10.3071	10.6382		1.16624	2.81406	6.45808	1.1251	1.18424	3.98036	4.28423	1.80787	1.05499	1.29384		10.1842	10.8026	7.06652	9.56002	9.34271	6.68108	10.7063	9.44319	9.51573	9.38772		1.14658	3.76696	1.4598	5.19537	2.25075	1.07253	1.13416	5.20332	4.09266	4.96773		10.6585	8.73715	9.73504	9.67342	10.5976	9.32077
9.96269	9.71447	9.02471	8.78165	7.18547	8.81474	9.50779	9.19155	10.039	10.6013		1.16443	2.84916	6.45669	1.12613	1.19553	3.95676	4.31805	1.8112	1.05115	1.29		10.1693	10.8185	7.05826	9.60386	9.42102	6.64047	10.7386	9.25093	9.5697	9.27799		1.13674	3.77482	1.45522	5.14902	2.24213	1.07061	1.12724	5.24012	3.54641	4.9884		10.7189	8.7963	9.74475	9.64357	10.6074	9.33418
10.0509	9.72307	9.15901	8.75016	7.28039	9.06737	9.47592	9.0925	10.2005	10.5189		1.16528	2.86869	6.45921	1.12254	1.20229	3.97154	4.27351	1.83617	1.05202	1.2831		10.5098	10.8349	7.11212	9.6117	9.39769	6.88877	10.7835	9.23879	9.54065	9.41274		1.14177	3.7799	1.46456	5.12415	2.2573	1.07597	1.15539	5.31508	3.99731	4.95049		10.3325	8.82919	9.70093	9.54519	10.5519	9.29986
9.90595	9.62899	9.08121	8.73733	7.83012	8.9031	9.44667	9.14963	10.1361	10.5963		1.16581	2.88851	6.45797	1.1219	1.20366	3.98702	4.27812	1.78739	1.05577	1.28026		10.2422	10.7513	7.11263	9.6615	9.28002	6.80994	10.7185	9.20179	9.55213	9.32643		1.13637	3.83593	1.46286	5.12763	2.24323	1.07715	1.16143	5.3491	4.08123	4.99457		10.5392	8.64752	9.72451	9.74784	10.5061	9.2971
9.9295	9.61416	9.06028	8.76486	7.85889	8.98548	9.50339	9.24584	10.2104	10.719		1.1693	2.88483	6.4521	1.12234	1.19399	3.98074	4.36681	1.79987	1.05731	1.27881		10.3213	10.7812	7.09455	9.67582	9.45507	6.8233	10.6843	9.01628	9.60707	9.40284		1.13868	3.88644	1.46061	5.05631	2.25096	1.07781	1.14944	5.39954	3.67284	4.96832		10.4153	8.71898	9.71006	9.32492	10.4857	9.30902
10.0458	9.78257	9.07935	8.71911	7.86464	8.92961	9.51572	9.21782	10.1439	10.6825		1.17151	2.86224	6.45518	1.12279	1.16946	3.98141	4.423	1.82313	1.05258	1.27724		10.3886	10.7608	7.12965	9.65453	9.4025	6.57358	10.6948	9.16332	9.6014	9.42939		1.13357	3.93496	1.46257	5.01514	2.24621	1.07947	1.16926	5.4178	4.24458	5.01335		10.5956	8.69033	9.72249	9.55494	10.6099	9.29209
9.83972	9.83794	9.14854	8.74296	8.52014	8.96895	9.43687	9.24382	10.365	10.584		1.17023	2.86323	6.46282	1.12076	1.20645	3.98399	4.36717	1.82336	1.05276	1.28202		10.2777	10.8421	7.13241	9.59532	9.24258	6.70647	10.6937	9.10587	9.55052	9.51761		1.1416	3.90001	1.46111	4.9734	2.23156	1.08792	1.16907	5.40759	4.39161	4.93293		10.6061	8.7703	9.69053	9.43154	10.5021	9.30211
10.0023	9.64954	9.09653	8.69807	8.61263	8.91812	9.51017	9.1767	10.23	10.5646		1.17292	2.9067	6.46569	1.12474	1.19138	4.0078	4.37551	1.80086	1.05616	1.28433		11.4304	10.8834	7.13967	9.62714	9.37764	6.83113	10.7387	8.95111	9.61395	9.41857		1.13968	3.88007	1.45788	4.92955	2.24089	1.07851	1.14013	5.40316	4.39451	4.91548		10.5965	8.76046	9.70493	9.29559	10.601	9.31219
9.81818	9.67479	9.14645	8.71731	8.47811	8.98015	9.54981	9.16845	10.126	10.4419		1.16762	2.93327	6.46058	1.12257	1.19518	4.03341	4.40307	1.80255	1.05737	1.28735		10.4849	10.7831	7.21693	9.61857	9.39584	6.65484	10.7471	9.26216	9.60361	9.52461		1.13983	3.89104	1.45848	4.87449	2.27678	1.08301	1.15825	5.38835	4.41239	4.85888		10.7016	8.72428	9.74835	9.50509	10.5343	9.32714
10.1027	9.75528	9.06035	8.70818	8.15013	8.92383	9.54873	9.30712	9.98164	10.5074		1.16259	2.92625	6.46265	1.11988	1.20057	4.02961	4.46862	1.80678	1.05457	1.2895		10.5063	10.7779	7.18405	9.62466	9.28252	6.53152	10.781	9.21058	9.65094	9.50064		1.13686	3.9148	1.4564	4.83125	2.31968	1.06828	1.19432	5.40659	4.51126	4.85538		10.6902	8.8299	9.7625	9.38863	10.5845	9.32866
10.0732	9.7808	9.15394	8.61872	8.07589	9.11383	9.6084	9.3146	10.1716	10.4753		1.1672	2.89321	6.4743	1.12053	1.1779	4.02634	4.40102	1.80771	1.05126	1.29375		10.2759	10.8784	7.19712	9.69939	9.32808	6.61078	10.7034	9.30787	9.65219	9.40541		1.14196	3.89535	1.46074	4.79538	2.35594	1.08286	1.14362	5.41277	4.5547	4.93701		10.5753	8.63001	9.74312	9.28515	10.5664	9.31526
10.1129	9.81665	9.21241	8.71196	7.70335	8.92084	9.51453	9.35092	10.2917	10.5392		1.16244	2.86977	6.4787	1.12206	1.16287	4.02477	4.38782	1.82824	1.04882	1.28997		10.7726	10.936	7.24731	9.71782	9.52374	6.25391	10.6748	9.27946	9.6584	9.33001		1.13835	3.88669	1.45618	4.7481	2.37059	1.07411	1.15257	5.3582	4.59909	4.95108		10.8521	8.76263	9.77453	9.25419	10.4605	9.35514
10.2114	9.81975	9.11063	8.66165	7.7858	8.87008	9.49272	9.34988	10.1541	10.4673		1.16167	2.92686	6.48384	1.11891	1.20704	4.00569	4.39448	1.8153	1.05411	1.28947		11.2993	10.8988	7.25765	9.69766	9.39993	6.45661	10.6241	9.19185	9.67674	9.25683		1.1314	3.90205	1.46971	4.74099	2.3931	1.06959	1.1609	5.43952	4.66687	4.98384		10.7716	8.72081	9.75803	9.07504	10.4092	9.27364
9.89871	9.75787	9.15708	8.60556	7.58824	9.02418	9.63756	9.28747	10.4165	10.5247		1.15831	2.9631	6.48696	1.11944	1.1993	4.00442	4.42002	1.7954	1.05471	1.29055		10.8917	10.899	7.28561	9.72233	9.48023	6.82219	10.5854	9.27368	9.68647	9.44963		1.13959	3.9515	1.45643	4.74808	2.41751	1.07307	1.1578	5.46403	4.78916	4.9578		10.8215	8.7832	9.72325	9.19091	10.4899	9.31123
9.90437	9.63423	9.16981	8.65187	8.01472	9.02411	9.80325	9.45184	10.3676	10.4624		1.16101	2.93957	6.49615	1.12126	1.19781	4.01116	4.39059	1.80625	1.05678	1.29295		11.0117	10.8994	7.29864	9.72875	9.39921	7.05262	10.6514	9.25945	9.74147	9.37639		1.13797	4.00129	1.46571	4.74627	2.44913	1.07648	1.14381	5.13352	4.70666	4.96554		10.4632	8.68989	9.7538	9.1665	10.4764	9.28511
10.0927	9.73802	9.15438	8.52695	7.44203	8.97274	9.6307	9.23898	10.4132	10.5159		1.16121	2.99607	6.50535	1.11817	1.20827	4.0251	4.4331	1.81445	1.05768	1.2905		11.0085	10.9306	7.31848	9.72785	9.52512	6.7374	10.6995	8.99012	9.74623	9.40752		1.13753	4.05186	1.47016	4.75153	2.47485	1.07825	1.15604	5.01391	4.71025	4.94253		10.652	8.69621	9.65102	9.30511	10.4379	9.25471
9.89347	9.73102	9.17534	8.6079	7.29286	9.08559	9.63979	9.50626	10.2937	10.3617		1.15818	2.97741	6.51807	1.11996	1.20274	4.03287	4.44252	1.79927	1.05813	1.29105		10.2669	10.9159	7.32994	9.73056	9.46425	6.85039	10.6694	9.19028	9.78387	9.35703		1.1407	4.06167	1.46032	4.80795	2.52337	1.07326	1.15429	5.20914	4.68591	4.98946		10.7949	8.74997	9.7144	9.06535	10.442	9.25066
9.93049	9.7257	9.30651	8.60709	6.94241	8.95546	9.82432	9.38931	10.3616	10.5088		1.15921	2.94747	6.50813	1.12052	1.18633	4.03686	4.46938	1.79386	1.05605	1.28999		10.318	10.7316	7.34482	9.75831	9.58096	7.04993	10.6547	9.31498	9.81326	9.38803		1.13914	4.07222	1.4678	4.84834	2.54147	1.07878	1.12467	5.32689	3.89411	4.9824		10.3653	8.67963	9.75038	9.15867	10.4302	9.23765
9.66963	9.7125	9.28039	8.56416	7.10386	9.0177	9.76317	9.39898	10.1598	10.4165		1.15807	2.97467	6.51379	1.11857	1.18049	4.05614	4.43493	1.81359	1.05897	1.28767		9.75261	10.9096	7.30779	9.73563	9.41909	6.7943	10.7278	9.14837	9.86538	9.45225		1.13366	4.03761	1.46443	4.85336	2.57329	1.07988	1.17712	5.38771	4.49295	4.94584		10.7133	8.63935	9.74578	9.00527	10.448	9.26281
9.88773	9.76041	9.34309	8.52834	7.22379	8.96888	9.68462	9.23119	10.3849	10.5441		1.15931	3.00013	6.50469	1.11754	1.19714	4.07454	4.29741	1.80689	1.05535	1.28862		10.2992	10.8313	7.35144	9.72614	9.59528	6.46799	10.7068	9.11926	9.79416	9.53878		1.13566	4.08447	1.46575	4.87693	2.62971	1.08025	1.14259	5.47698	4.72405	4.88129		10.8892	8.74369	9.76661	9.18113	10.3562	9.22619
9.91988	9.67331	9.24994	8.47179	7.33884	9.1498	9.87231	9.15888	10.2893	10.4972		1.15823	3.01296	6.50598	1.11921	1.1776	4.06388	4.43267	1.83623	1.05035	1.28847		10.0342	10.9454	7.35442	9.77152	9.51952	6.45467	10.6914	9.08284	9.867	9.53346		1.13077	4.048	1.46602	4.90748	2.6921	1.08036	1.16211	5.53775	4.21166	4.96467		10.7993	8.6362	9.71538	9.31451	10.4302	9.29621
9.92752	9.63538	9.25307	8.60393	7.2932	8.94786	9.8522	9.25459	10.3669	10.4866		1.15566	3.03958	6.52591	1.11846	1.18937	4.06833	4.47965	1.8292	1.05326	1.28896		10.3007	10.8812	7.38972	9.78524	9.18814	6.74013	10.6864	8.91471	9.92344	9.55461		1.1406	4.05821	1.46235	4.93477	2.78061	1.07864	1.15423	5.497	4.8038	4.96896		10.9881	8.66341	9.71707	9.41576	10.344	9.24012
10.1747	9.67555	9.27479	8.48224	6.78865	8.98352	9.66119	9.14948	10.1724	10.4531		1.15586	2.97404	6.52444	1.11937	1.18827	4.05889	4.42862	1.81391	1.05599	1.28915		10.3125	10.8195	7.45019	9.80269	9.65676	6.62032	10.6833	9.0244	9.93275	9.5233		1.13286	4.11717	1.46877	4.98638	2.8684	1.07598	1.15868	5.55311	4.89726	4.96216		10.9468	8.63883	9.66194	9.47345	10.3466	9.2767
9.99029	9.55693	9.29542	8.58446	7.28014	9.21595	9.73405	9.09607	10.3096	10.5967		1.14987	2.97922	6.52813	1.12154	1.17274	4.08084	4.49966	1.83292	1.05461	1.29064		10.5273	10.842	7.41366	9.83789	9.64211	6.97998	10.6524	9.00522	9.98583	9.49345		1.13611	4.15519	1.47062	5.01095	2.94868	1.07899	1.14448	5.64376	5.02034	4.95666		10.6979	8.67035	9.65017	9.55596	10.4078	9.20376
9.83121	9.59573	9.29736	8.409	6.97656	9.04467	9.89017	9.17691	10.3747	10.4813		1.14965	3.00943	6.52916	1.12626	1.20456	4.08703	4.52567	1.79919	1.05139	1.28982		10.3207	10.8795	7.39069	9.82549	9.54067	7.1321	10.7035	9.16755	9.95796	9.53827		1.13907	4.15052	1.47238	4.99691	3.03369	1.07794	1.18614	5.62407	4.98824	4.85996		10.9304	8.6283	9.62144	9.47024	10.4336	9.26476
10.073	9.59117	9.32812	8.47918	7.63457	9.19459	9.70659	9.04959	10.4567	10.5059		1.14847	2.99906	6.53042	1.12446	1.19404	4.07939	4.60439	1.82606	1.05042	1.29196		10.3168	10.7835	7.38892	9.83242	9.49701	6.87488	10.7238	8.81147	9.998	9.58759		1.13788	4.16519	1.47022	5.01617	3.09723	1.07307	1.1395	5.63668	4.95164	4.93458		10.848	8.71557	9.65131	9.53989	10.4105	9.25722
9.88149	9.6066	9.33344	8.5647	7.45168	9.14042	9.65374	9.31201	10.4933	10.499		1.15013	3.06805	6.53247	1.12641	1.18767	4.06569	4.56906	1.81569	1.04889	1.29032		9.96866	10.8307	7.45032	9.87372	9.56998	6.63554	10.6262	8.87768	9.98631	9.49919		1.13287	4.22208	1.47775	5.05763	3.12609	1.07994	1.18104	5.64816	4.96222	4.92194		11.0907	8.69003	9.62963	9.36009	10.4498	9.24352
9.73687	9.70742	9.31188	8.60075	7.67676	9.05631	9.80423	9.23064	10.5435	10.4272		1.15096	3.04151	6.54463	1.12985	1.19015	4.07543	4.66277	1.8384	1.05489	1.28432		10.0642	10.9438	7.44384	9.93516	9.67408	7.05493	10.4954	8.8463	10.0173	9.48778		1.13768	4.24029	1.4793	5.00188	3.15607	1.07863	1.15757	5.63825	4.96662	4.95681		10.9174	8.70866	9.6326	9.43032	10.4313	9.26679
9.75938	9.74261	9.35578	8.60137	7.48422	9.01511	9.73553	9.18624	10.3933	10.476		1.15314	3.00513	6.54123	1.12921	1.19233	4.08716	4.65769	1.80874	1.05331	1.28143		10.5786	10.8426	7.43961	9.90326	9.56199	6.57556	10.5775	8.80047	9.99912	9.56285		1.13707	4.31816	1.47884	4.98893	3.14842	1.07993	1.1616	5.62588	4.90491	4.95375		10.9022	8.63201	9.59223	9.35348	10.3432	9.25632
9.83075	9.66289	9.42772	8.54356	7.29916	9.03765	9.57707	9.19707	10.4173	10.4086		1.15226	3.04241	6.55177	1.12897	1.18637	4.09613	4.67097	1.81486	1.05715	1.28361		10.2099	10.9227	7.40121	9.94789	9.61946	6.60047	10.682	9.02786	10.0339	9.54386		1.13251	4.32419	1.47162	4.9743	3.1308	1.07312	1.175	5.65463	4.96948	5.08351		10.7855	8.6164	9.61151	9.30995	10.4907	9.24467
9.86856	9.67024	9.38788	8.60145	7.66433	9.1579	9.67035	9.21996	10.3127	10.4483		1.15184	3.06209	6.55356	1.13004	1.20481	4.08939	4.61977	1.81916	1.05564	1.2805		9.89433	10.9043	7.37434	9.97821	9.73082	7.08678	10.5259	8.86299	9.97484	9.41426		1.13107	4.35066	1.47397	4.94712	3.12338	1.07827	1.15197	5.64058	5.07581	5.167		10.8725	8.55743	9.57472	9.46408	10.3959	9.20084
9.87823	9.55823	9.34309	8.47025	6.85772	9.20277	9.76964	9.34093	10.3394	10.4234		1.15161	3.0827	6.56218	1.13018	1.20979	4.09481	4.59982	1.82509	1.05873	1.28004		10.8064	10.7928	7.35891	9.96707	9.63939	6.85875	10.4938	8.94609	10.0369	9.57077		1.12766	4.3542	1.47513	4.94426	3.09768	1.07915	1.13677	5.66438	5.08134	5.12676		10.7278	8.63306	9.53689	9.41486	10.4324	9.24941
9.84357	9.58762	9.30078	8.61334	7.42734	9.07861	9.57996	9.27542	10.3702	10.3254		1.14788	3.08284	6.55504	1.12967	1.18363	4.10702	4.62195	1.80603	1.05718	1.27877		10.4431	10.9308	7.3546	10.0532	9.48973	6.79769	10.6297	8.71944	10.0025	9.56948		1.1289	4.35554	1.48095	4.92584	3.07443	1.07651	1.14926	5.67801	5.07077	5.13124		10.9162	8.55534	9.54392	9.04206	10.4232	9.21827
9.81884	9.55592	9.41662	8.59649	7.44387	8.99352	9.71583	9.23713	10.4317	10.2877		1.14571	3.06857	6.55837	1.12915	1.19407	4.11836	4.55186	1.78809	1.05644	1.27931		10.6071	11.0164	7.43436	10.0931	9.53967	6.92272	10.6555	8.72975	9.93989	9.59927		1.12789	4.38442	1.47485	4.91216	3.04257	1.0697	1.17135	5.72019	5.00972	5.22924		10.8321	8.5774	9.50257	9.09887	10.3858	9.20079
9.89413	9.74821	9.34713	8.56883	7.79399	9.17897	9.87268	9.26269	10.5509	10.364		1.14865	3.07694	6.55475	1.12819	1.19228	4.13147	4.57536	1.81509	1.05617	1.27927		9.88047	10.8815	7.41436	10.0846	9.42266	6.8364	10.534	8.69907	9.99191	9.61209		1.13621	4.36387	1.46857	4.9017	3.00998	1.07851	1.17126	5.6779	5.02658	5.16287		11.0232	8.62396	9.54342	9.30858	10.424	9.21303
9.80248	9.61605	9.46345	8.58681	7.43082	9.08042	9.81551	9.07733	10.4758	10.3372		1.14913	3.10859	6.56559	1.12607	1.18337	4.13957	4.72813	1.80878	1.05587	1.27901		9.80974	10.7745	7.42618	10.0354	9.53144	6.91934	10.6575	8.79862	9.98653	9.6522		1.1358	4.35429	1.47053	4.89093	2.99519	1.07747	1.17143	5.74466	5.161	5.19262		10.8449	8.62988	9.58212	8.97075	10.4373	9.25946
9.73489	9.62151	9.43535	8.64486	7.81701	9.16137	9.75669	9.17671	10.3627	10.5018		1.14291	3.12479	6.56816	1.12643	1.18858	4.14901	4.66585	1.82189	1.05724	1.28111		10.7417	10.7421	7.51922	10.0128	9.64547	7.05187	10.7354	8.98163	10.0346	9.67677		1.13093	4.40178	1.46488	4.9331	2.97004	1.07991	1.14389	5.78499	5.16941	5.17337		10.8726	8.60191	9.57112	8.99436	10.2859	9.22007
9.89555	9.53052	9.46463	8.61575	7.5355	9.17296	9.91041	9.19139	10.4005	10.396		1.14448	3.10253	6.56354	1.12529	1.17956	4.17134	4.73409	1.8151	1.05423	1.2767		10.6208	10.8283	7.48932	10.0417	9.39007	6.78095	10.5892	8.87427	9.97336	9.60636		1.13622	4.4072	1.46538	4.87162	2.92181	1.07896	1.16658	5.81719	5.05958	5.21195		11.2817	8.60061	9.60993	9.14368	10.4501	9.21471
9.73473	9.54925	9.50109	8.69988	8.14432	9.18437	9.8949	9.23263	10.2934	10.3622		1.14376	3.10128	6.57026	1.12306	1.18422	4.18323	4.69119	1.82861	1.05157	1.27492		9.81428	10.8745	7.46981	10.0729	9.40931	6.58485	10.6346	8.81677	10.0237	9.68685		1.13953	4.44818	1.47572	4.8707	2.88914	1.0763	1.16946	5.78256	5.0044	5.13919		10.8793	8.67683	9.61712	8.83907	10.3829	9.24634
10.1361	9.64039	9.44642	8.70876	8.16451	9.10943	9.72625	9.2712	10.4516	10.3359		1.14532	3.10134	6.5751	1.12245	1.16939	4.1898	4.5832	1.80288	1.05362	1.27574		10.321	10.95	7.56338	10.048	9.41712	6.5816	10.6716	8.90577	10.0765	9.70624		1.13307	4.46278	1.47815	4.84432	2.85794	1.08601	1.14065	5.79785	4.98853	5.14006		10.7488	8.54415	9.58455	9.07824	10.3916	9.25164
10.1041	9.53776	9.42433	8.71786	7.91776	9.28397	9.77408	9.22892	10.5429	10.3635		1.1429	3.12333	6.57663	1.12363	1.18909	4.14421	4.63296	1.82114	1.05418	1.27626		10.0957	10.839	7.52146	10.056	9.52435	6.78275	10.6231	8.78852	10.0325	9.6652		1.13302	4.3951	1.47073	4.78907	2.82532	1.08544	1.13788	5.85388	4.94232	5.13671		10.7163	8.66358	9.5937	9.04917	10.4076	9.24238
9.97732	9.58356	9.53104	8.64021	7.68154	9.06643	9.90309	9.25339	10.6565	10.349		1.14167	3.15708	6.58463	1.1234	1.16918	3.5161	4.62441	1.80141	1.0575	1.27683		9.84084	10.9031	7.50928	10.1316	9.45091	6.86514	10.5372	8.67163	10.0923	9.65168		1.13149	4.40898	1.46898	4.74876	2.83808	1.08511	1.18342	5.85247	4.85752	5.12736		11.1797	8.59819	9.58787	8.95898	10.38	9.24297
10.1376	9.639	9.51026	8.65545	8.24122	9.15822	9.8119	9.33428	10.4702	10.3457		1.14218	3.16621	6.58905	1.12154	1.18549	2.78135	4.65187	1.82131	1.05761	1.27458		10.0792	10.7266	7.53328	10.1993	9.57297	6.76095	10.659	8.55866	10.0858	9.6498		1.13756	4.39605	1.46668	4.69698	2.84479	1.07452	1.13434	5.87288	5.00057	5.13562		11.1694	8.63204	9.58486	8.90755	10.3506	9.2751
9.906	9.72558	9.54506	8.72821	7.71912	9.20835	9.85279	9.26606	10.424	10.3419		1.14171	3.1698	6.59556	1.12154	1.17688	2.65429	4.67606	1.81153	1.05699	1.27237		9.89695	10.761	7.5613	10.192	9.71634	6.50223	10.7053	8.58047	10.0588	9.62811		1.13168	4.40737	1.47562	4.68117	2.87568	1.08109	1.19067	5.88611	5.11974	5.07207		11.1213	8.60888	9.61405	8.79058	10.2937	9.2379
9.9338	9.74963	9.54364	8.76651	8.12734	9.37475	9.88135	9.33367	10.4831	10.2599		1.14114	3.14183	6.59337	1.1207	1.21016	2.88816	4.6427	1.84971	1.05383	1.27084		10.1848	10.966	7.55284	10.2636	9.57819	6.68102	10.5682	8.61782	10.0027	9.63693		1.13752	4.37034	1.46791	4.659	2.88817	1.08394	1.15423	5.92134	5.30091	5.20378		11.2817	8.58166	9.61857	8.95618	10.3568	9.26065
9.81757	9.51978	9.49939	8.63572	7.93365	9.05257	9.87021	9.23094	10.7329	10.3667		1.14415	3.13236	6.58411	1.11888	1.1857	3.15958	4.70617	1.86262	1.0548	1.27269		10.3814	10.8022	7.53098	10.2406	9.59793	6.28957	10.6039	8.76187	10.1368	9.71445		1.1248	4.36671	1.46541	4.66103	2.89256	1.08135	1.16867	5.9076	5.54637	5.15944		11.3163	8.57811	9.62656	8.74363	10.3932	9.26189
9.94951	9.57247	9.50219	8.75586	7.87761	9.31605	9.72711	9.20824	10.4749	10.3184		1.13843	3.15346	6.58219	1.1192	1.18091	3.39563	4.72956	1.85493	1.05524	1.27114		9.6311	10.8317	7.65457	10.3018	9.71203	6.87612	10.6786	8.77656	10.1219	9.69787		1.12815	4.39793	1.47382	4.6502	2.86826	1.07774	1.14835	5.9192	5.41609	5.14023		11.2956	8.59304	9.59509	8.86074	10.4126	9.27543
9.88749	9.61884	9.5419	8.64602	7.94661	9.18625	9.78568	9.25681	10.6064	10.4007		1.13775	3.1641	6.59239	1.1214	1.18477	3.57171	4.74929	1.85136	1.05579	1.27426		10.9565	10.8658	7.66736	10.3389	9.75564	6.65776	10.6339	8.77125	10.0724	9.57129		1.13002	4.41292	1.47137	4.66799	2.86137	1.07221	1.15407	5.95326	5.41213	5.09634		11.3498	8.53733	9.59062	8.81448	10.37	9.25642
9.78338	9.61352	9.55048	8.66819	7.58495	9.11987	9.80826	9.31042	10.4266	10.279		1.13682	3.17209	6.59924	1.11944	1.21058	3.69955	4.75943	1.83795	1.0519	1.27397		9.66001	10.8053	7.54887	10.3659	9.69825	6.67066	10.6186	8.65267	10.1657	9.72583		1.1264	4.45174	1.46266	4.64458	2.85176	1.0776	1.18299	5.97157	5.28016	5.08376		11.6326	8.56101	9.57992	9.05547	10.2885	9.28229
9.88847	9.68854	9.52361	8.64245	7.41214	9.05641	9.68146	9.36991	10.624	10.3785		1.13472	3.19943	6.59471	1.11957	1.19676	3.80602	4.75172	1.84489	1.04816	1.27466		10.305	10.8575	7.5891	10.3599	9.68496	6.89082	10.7281	8.65793	10.1741	9.79183		1.12761	4.44692	1.4683	4.63579	2.83118	1.07491	1.15955	5.9959	5.40665	5.0696		11.3742	8.53324	9.61389	9.13992	10.3348	9.25514
9.8406	9.594	9.58929	8.73681	7.44052	9.19538	9.73442	9.32846	10.4676	10.3245		1.13416	3.15355	6.59826	1.12039	1.18812	3.90958	4.64443	1.84258	1.0483	1.27278		10.6494	10.9076	7.56844	10.3852	9.70674	6.74552	10.7125	8.66967	10.097	9.77284		1.12914	4.45968	1.46728	4.66793	2.80965	1.07686	1.15437	6.01307	5.40271	5.11675		11.4193	8.51237	9.61048	9.06391	10.3209	9.26973
9.59934	9.51368	9.61981	8.66399	7.23264	9.09473	9.80498	9.32283	10.6574	10.2572		1.13482	3.21353	6.5988	1.11907	1.17108	4.00422	4.662	1.85514	1.05166	1.27184		10.2142	10.8745	7.56796	10.4748	9.50203	6.7704	10.6958	8.71674	10.1277	9.86859		1.12601	4.45805	1.46884	4.66033	2.78672	1.0771	1.15932	6.02832	5.48474	5.10184		11.5179	8.5419	9.58627	9.15922	10.2363	9.30866
9.9076	9.57925	9.63045	8.64168	7.48068	9.03381	9.78201	9.1556	10.6647	10.2934		1.13326	3.25318	6.60418	1.12098	1.17454	4.0741	4.73557	1.83447	1.04852	1.26954		10.3214	10.8118	7.50195	10.4458	9.53842	7.0419	10.7698	8.84525	10.1517	9.82496		1.13273	4.47385	1.46181	4.67839	2.80061	1.0808	1.15087	6.07375	5.33302	5.1611		11.4306	8.46299	9.60049	9.32084	10.3119	9.31099
9.76749	9.56326	9.6394	8.72363	7.0416	9.18038	9.809	9.23313	10.5755	10.365		1.13631	3.21328	6.60271	1.12278	1.18098	4.11916	4.63005	1.8321	1.0525	1.26686		10.8289	10.7212	7.51787	10.4037	9.61353	6.96153	10.707	8.61037	10.1265	9.72241		1.13737	4.48259	1.46374	4.69693	2.78097	1.07815	1.16275	6.08683	5.29996	5.06171		11.7376	8.52058	9.64169	9.34671	10.3458	9.27211
9.78873	9.6459	9.66329	8.75426	7.27994	9.21706	9.82582	9.24131	10.5113	10.3364		1.13351	3.21263	6.61123	1.12044	1.17406	4.16168	4.60398	1.82733	1.05432	1.26847		10.3193	10.7613	7.41598	10.4839	9.55314	7.00732	10.673	8.56261	10.0887	9.78491		1.13131	4.53015	1.46206	4.72787	2.79352	1.0831	1.144	6.16944	5.29131	5.04758		11.5807	8.53104	9.65	9.36962	10.3786	9.2798
9.91831	9.49086	9.63391	8.71674	7.4417	9.28009	9.87416	9.26676	10.3764	10.2786		1.13718	3.17508	6.61255	1.12006	1.19794	4.17702	4.55776	1.83839	1.05262	1.26751		10.5321	10.787	7.46693	10.4446	9.5565	6.89346	10.717	8.94374	10.1638	9.85069		1.12721	4.48579	1.47218	4.7809	2.78402	1.07458	1.15737	6.17317	5.32691	5.02638		11.4166	8.45433	9.66556	9.32248	10.1837	9.32491
9.80199	9.64957	9.55669	8.81866	6.98169	9.07753	9.79757	9.20998	10.5025	10.4259		1.13829	3.21907	6.60729	1.11989	1.18045	4.18026	4.57275	1.85714	1.05424	1.26917		10.7623	10.7746	7.4927	10.401	9.50685	7.11382	10.7158	8.78321	10.2273	9.89656		1.13501	4.52952	1.47681	4.79834	2.78198	1.08013	1.16094	6.23238	5.34391	5.04749		11.0565	8.49827	9.64874	9.47908	10.2412	9.27519
9.79467	9.74062	9.59338	8.71166	7.15395	9.42478	9.86774	9.35912	10.4437	10.3641		1.1371	3.25057	6.61883	1.11912	1.17546	4.20449	4.60198	1.82011	1.05368	1.26861		10.432	10.8732	7.48593	10.439	9.95933	6.74937	10.6312	8.7192	10.1649	9.74046		1.12927	4.62273	1.47169	4.80365	2.76701	1.07557	1.15739	6.33059	5.37547	5.03071		11.346	8.44465	9.6912	9.47647	10.2865	9.27209
9.7894	9.56675	9.70576	8.72927	7.34437	9.18168	9.82278	9.26545	10.6536	10.3162		1.13298	3.26209	6.61279	1.12036	1.16414	4.20248	4.56754	1.84492	1.05401	1.26741		9.64683	10.8648	7.43945	10.4564	9.63482	6.62177	10.6814	8.60298	10.223	9.88123		1.13195	4.6381	1.47691	4.86536	2.75624	1.0778	1.15956	6.3996	5.29321	4.97616		11.6756	8.43083	9.664	9.43739	10.2562	9.32541
9.76003	9.6616	9.6552	8.74177	6.82792	9.2445	9.82747	9.24724	10.5526	10.2899		1.13524	3.22451	6.62287	1.11972	1.18662	4.21128	4.57889	1.84759	1.05383	1.26324		9.78818	10.8581	7.52153	10.4304	9.78347	7.02341	10.7399	8.81111	10.2432	9.86603		1.13422	4.69589	1.47393	4.84498	2.80278	1.08054	1.14294	6.46163	5.40576	5.02811		11.7209	8.51125	9.64533	9.36426	10.2772	9.30962
9.68653	9.73948	9.64322	8.71958	6.94459	9.36425	9.96071	9.31242	10.6367	10.3222		1.13335	3.21062	6.63027	1.12016	1.17675	4.21238	4.63376	1.84576	1.05758	1.2618		9.98804	10.7751	7.53781	10.5024	9.59802	6.90078	10.624	8.78699	10.2911	9.81199		1.12929	4.71915	1.47433	4.86965	2.80554	1.07822	1.16938	6.56589	5.47889	5.0013		12.071	8.5538	9.60267	9.43269	10.2178	9.36885
9.90723	9.40893	9.66932	8.76779	7.04416	9.40414	9.96546	9.27629	10.7024	10.3393		1.13168	3.25092	6.62403	1.11962	1.20721	4.22077	4.62101	1.83725	1.05108	1.26259		11.4268	10.793	7.51714	10.4584	9.64943	7.18733	10.6445	9.01413	10.2422	9.85936		1.13041	4.6807	1.48016	4.83713	2.81573	1.07443	1.17415	6.63454	5.47488	5.03763		11.7338	8.52164	9.7	9.2622	10.2193	9.3209
9.6409	9.56849	9.7412	8.80109	7.29023	9.01507	9.94127	9.24429	10.5403	10.3548		1.13008	3.28632	6.63235	1.11869	1.18904	4.23166	4.6274	1.82552	1.05172	1.2627		10.1378	10.5972	7.54213	10.445	9.74455	6.98235	10.695	8.80274	10.2441	9.88531		1.13131	4.72036	1.48104	4.86695	2.85321	1.07899	1.16423	6.64666	5.47314	4.99873		11.8447	8.51942	9.80728	9.12244	10.2264	9.36984
9.83854	9.40736	9.67139	8.82194	7.48587	9.01665	9.83294	9.2256	10.6321	10.2992		1.12827	3.29526	6.63511	1.11718	1.17489	4.23368	4.61626	1.80825	1.05753	1.26294		9.75808	10.8413	7.55778	10.4201	9.8621	7.00138	10.6173	8.86926	10.286	9.87035		1.13016	4.74356	1.48285	4.7903	2.89748	1.08409	1.17618	6.64833	5.50066	5.05732		11.9092	8.51746	9.86399	9.1222	10.2202	9.37168
9.79781	9.72765	9.65567	8.76959	7.44423	9.28878	9.88046	9.22698	10.4973	10.2442		1.13051	3.2727	6.63457	1.11947	1.20229	4.23892	4.63826	1.86731	1.0548	1.26358		9.96881	10.7358	7.52907	10.4836	9.75536	6.93956	10.552	8.70272	10.341	9.95265		1.13791	4.70628	1.47387	4.7683	2.96033	1.07837	1.1752	6.71838	5.39188	5.05674		11.936	8.45824	9.81816	9.33483	10.2565	9.36706
9.80633	9.54904	9.73792	8.87001	6.99151	9.25283	9.95821	9.27456	10.7341	10.3017		1.1321	3.23999	6.62623	1.11733	1.18367	4.25009	4.67493	1.82963	1.05341	1.25921		10.3018	10.7661	7.56745	10.449	9.838	7.14885	10.6629	9.02723	10.3113	9.93991		1.13681	4.67367	1.47551	4.73226	3.02066	1.07485	1.15935	6.69439	5.57371	5.13849		12.0118	8.54792	9.84911	9.17833	10.2815	9.3915
9.69474	9.70302	9.71694	8.83505	6.78435	9.21992	9.88957	9.2602	10.7216	10.2663		1.12818	3.24331	6.63377	1.11674	1.19212	4.25	4.59987	1.84031	1.0553	1.25326		10.3176	10.6946	7.52767	10.5256	9.85469	6.73048	10.6984	8.59174	10.3783	9.93494		1.13461	4.70646	1.48099	4.72023	3.06997	1.07214	1.16241	6.7343	5.72286	5.14491		11.7508	8.50491	9.84869	9.1261	10.2182	9.33984
9.70116	9.47499	9.70087	8.79207	7.29182	8.99262	9.88075	9.31591	10.8018	10.3837		1.12854	3.26122	6.63735	1.11727	1.16532	4.25372	4.65313	1.83593	1.05221	1.24831		9.56827	10.7347	7.5286	10.5332	9.61239	6.9068	10.6006	8.67316	10.33	9.95382		1.12617	4.70636	1.48244	4.68072	3.12731	1.07711	1.14675	6.69947	5.81488	5.1458		11.9703	8.44056	9.81424	9.10425	10.2731	9.33984
9.75942	9.59283	9.68081	8.79498	6.98668	9.10826	9.83087	9.26533	10.7855	10.3356		1.13017	3.27001	6.64169	1.11715	1.16019	4.25458	4.64769	1.84806	1.05646	1.24975		10.2088	10.6502	7.57796	10.565	9.61558	7.08765	10.6975	8.86255	10.306	10.036		1.12677	4.69986	1.48346	4.65601	3.16433	1.07986	1.14279	6.71751	5.84318	5.15859		11.5383	8.48623	9.84307	9.14062	10.2415	9.3141
9.74917	9.54389	9.67946	8.78562	7.21308	8.98912	9.84722	9.26801	10.708	10.2948		1.12794	3.27584	6.64893	1.11907	1.18983	4.26481	4.69157	1.8234	1.05666	1.24492		10.1699	10.7203	7.51616	10.5533	9.9215	6.71963	10.7698	8.49947	10.3436	9.96461		1.13157	4.69686	1.46959	4.64994	3.16568	1.07843	1.17084	6.73516	5.80452	5.13219		11.6946	8.53503	9.84538	8.85402	10.1356	9.2811
9.68058	9.60656	9.75015	8.77511	7.0535	9.38174	9.67562	9.32521	10.8292	10.237		1.12831	3.28828	6.64082	1.12038	1.2032	4.28147	4.71818	1.8271	1.05802	1.24663		10.0935	10.7618	7.44186	10.5262	9.67172	6.6443	10.6638	8.52006	10.2715	9.91375		1.12986	4.7692	1.47724	4.64315	3.18764	1.07372	1.16318	6.7233	5.66005	5.11735		11.5407	8.46784	9.78631	9.03111	10.2508	9.26004
9.61672	9.48112	9.67545	8.85493	7.19897	9.26205	9.81842	9.39946	10.6349	10.1828		1.12751	3.29724	6.63978	1.1204	1.19179	4.30527	4.76629	1.83321	1.0578	1.24744		10.2716	10.7685	7.45428	10.5786	9.70359	6.16947	10.6615	8.44223	10.2922	10.0209		1.12744	4.81852	1.47209	4.62531	3.19333	1.07478	1.14946	6.76701	5.61112	5.10698		11.7357	8.44326	9.81003	8.73284	10.1849	9.21217
9.69153	9.56594	9.77613	8.79542	7.496	9.22918	9.95047	9.3038	10.6554	10.2744		1.12578	3.26509	6.64818	1.12192	1.18968	4.3205	4.72616	1.81863	1.06029	1.24913		9.59821	10.6844	7.4593	10.5693	9.87257	6.93072	10.8059	8.39418	10.2698	10.0433		1.13457	4.82448	1.47672	4.60738	3.20551	1.07372	1.13702	6.76539	5.52439	5.06468		11.9659	8.52193	9.67602	8.97719	10.1528	9.24584
9.77855	9.52197	9.77229	8.75555	7.23766	9.21501	9.87818	9.18088	10.5478	10.1825		1.12359	3.28031	6.6492	1.12424	1.15661	4.33141	4.71846	1.83016	1.05625	1.24935		9.73642	10.8898	7.42591	10.6377	9.80716	6.34827	10.7444	8.4585	10.2477	10.1065		1.13231	4.89035	1.46751	4.62428	3.19631	1.07556	1.15422	6.72977	5.62427	5.03211		11.911	8.51147	9.73914	9.0311	10.0871	9.25056
9.8538	9.68121	9.70345	8.73712	7.12688	9.24079	9.87516	9.24986	10.744	10.2802		1.12349	3.30076	6.6497	1.12468	1.18548	4.30955	4.72569	1.8395	1.05728	1.24955		10.2629	10.7014	7.49975	10.6338	9.86905	6.47941	10.6525	8.43526	10.2762	10.1319		1.13057	4.88714	1.47603	4.60278	3.21902	1.0844	1.13698	6.75651	5.74823	5.00705		11.8728	8.46672	9.68645	9.01863	10.1191	9.24764
9.7072	9.55098	9.80047	8.77148	7.08512	9.49445	9.97678	9.25088	10.7442	10.2709		1.12357	3.29129	6.6379	1.12472	1.17454	4.29821	4.70797	1.85158	1.05357	1.24675		10.0483	10.7814	7.5511	10.6137	9.76891	6.76612	10.7518	8.62526	10.3021	10.0177		1.13504	4.88109	1.47749	4.60874	3.2696	1.08294	1.13522	6.80736	5.78973	4.91979		11.9864	8.4698	9.75585	8.96339	10.1495	9.20704
9.68964	9.50843	9.76329	8.80417	7.13009	9.13136	9.84716	9.4171	10.7877	10.1316		1.12506	3.27608	6.64789	1.1254	1.17939	4.29708	4.67549	1.84205	1.05878	1.24423		10.0889	10.7447	7.57746	10.6017	9.55561	6.51903	10.7006	8.19297	10.3381	10.1604		1.13451	4.81942	1.47108	4.62566	3.29938	1.08012	1.1723	6.77114	5.64494	4.90861		11.8427	8.51827	9.75868	8.96657	10.0748	9.19772
9.56764	9.58452	9.74693	8.67829	6.98171	9.37975	9.79175	9.37994	10.6957	10.2474		1.12225	3.28544	6.66328	1.12533	1.18893	4.30583	4.72526	1.8491	1.05754	1.24597		9.55841	10.8121	7.58558	10.6189	9.84037	6.99754	10.6311	8.48546	10.3387	10.2101		1.13583	4.87927	1.47251	4.62207	3.34445	1.08188	1.14664	6.75923	5.55925	4.95016		11.9146	8.5083	9.78958	9.00224	10.1205	9.19668
9.65984	9.47922	9.78847	8.68828	7.26654	9.49158	9.9694	9.40596	10.5348	10.2227		1.12151	3.30674	6.65922	1.12259	1.18114	4.32029	4.72721	1.87555	1.05543	1.24524		10.2549	10.914	7.54127	10.6728	9.68328	7.06536	10.7239	8.38525	10.3442	10.1235		1.13102	4.85066	1.47521	4.65776	3.36982	1.08552	1.16291	6.79453	5.46768	4.97476		11.6434	8.41806	9.71734	9.0736	10.1195	9.22421
9.71203	9.47758	9.75484	8.66814	7.61177	9.4174	9.97921	9.36117	10.6806	10.2707		1.11846	3.30456	6.66964	1.12381	1.19733	4.32637	4.73712	1.8316	1.05466	1.24318		10.1299	10.8002	7.58468	10.6425	9.80049	6.84021	10.6896	8.31578	10.4146	10.2067		1.13061	4.8626	1.46879	4.65048	3.39837	1.08612	1.14654	6.803	5.36718	4.90714		11.5839	8.5328	9.75181	8.84742	10.0825	9.21892
9.52888	9.64401	9.76144	8.68818	7.0883	9.30387	9.7589	9.34459	10.4613	10.2481		1.12202	3.31074	6.66882	1.12357	1.19805	4.2656	4.66872	1.84044	1.04801	1.24422		9.9688	10.8417	7.58567	10.6928	9.94757	6.8291	10.6425	8.3707	10.402	10.2214		1.13211	4.89984	1.48131	4.63866	3.39229	1.08136	1.13902	6.83739	5.3231	4.97157		11.5469	8.41134	9.72795	9.11223	10.0508	9.20293
9.63575	9.46393	9.83393	8.66898	7.83193	9.19212	9.81743	9.32452	10.679	10.3118		1.12111	3.32095	6.67198	1.12117	1.20327	3.60299	4.74892	1.83439	1.05414	1.24433		9.76013	10.7065	7.66677	10.6355	9.82447	6.93431	10.6688	8.56718	10.3356	10.1548		1.12893	4.89579	1.47563	4.658	3.38596	1.07721	1.12887	6.86806	5.3175	4.93702		11.3755	8.4398	9.70519	9.06888	10.0517	9.18817
9.55458	9.46081	9.83268	8.57505	7.4768	9.19592	9.86379	9.37557	10.7697	10.3716		1.11851	3.32691	6.67414	1.1192	1.19855	3.36974	4.72357	1.84196	1.0488	1.24336		10.3789	10.6153	7.68799	10.6983	9.79135	7.14402	10.7421	8.50404	10.3702	10.2017		1.13331	4.86391	1.48091	4.70313	3.40332	1.08058	1.14663	6.89682	5.27034	4.9413		11.3249	8.44583	9.73886	9.07649	10.1041	9.21771
9.58035	9.54568	9.77518	8.58557	7.96618	9.26142	9.77157	9.28201	10.5517	10.3076		1.11609	3.36417	6.67771	1.11943	1.18318	3.48026	4.79606	1.83434	1.05715	1.24628		9.89357	10.8195	7.78619	10.7208	9.96791	6.91347	10.6554	8.25093	10.3794	10.1607		1.13065	4.87	1.47187	4.7194	3.39013	1.07267	1.16531	6.85771	5.46761	5.02634		11.7211	8.42814	9.67459	9.01144	10.1794	9.21189
9.65155	9.53586	9.76347	8.62313	7.48679	9.51281	9.81645	9.26891	10.778	10.3137		1.11555	3.35472	6.67677	1.11583	1.18272	3.66105	4.78171	1.85226	1.05788	1.24514		9.78852	10.681	7.81826	10.7334	9.79404	7.2277	10.6483	8.33074	10.3743	10.2191		1.1354	4.89266	1.48199	4.76997	3.36117	1.0724	1.17398	6.9057	5.52468	4.96838		11.6529	8.44811	9.69683	9.0446	10.1024	9.23336
9.50484	9.53406	9.69735	8.62461	6.99184	9.29689	9.83723	9.40478	10.728	10.2704		1.11806	3.34495	6.67726	1.11632	1.1909	3.81678	4.80654	1.83569	1.05759	1.24498		10.521	10.8334	7.86686	10.7067	9.83315	6.72082	10.7005	8.48484	10.3735	10.3221		1.13309	4.89228	1.47978	4.79617	3.33169	1.07697	1.12905	6.94677	5.60278	5.06062		11.8757	8.37652	9.69508	9.07797	10.0641	9.24764
9.65429	9.44599	9.87844	8.58761	7.14864	9.34326	9.74704	9.13422	10.6977	10.2521		1.11557	3.37509	6.67974	1.11624	1.18748	3.97336	4.84799	1.86897	1.05231	1.24732		9.90849	10.8324	7.95873	10.7382	9.81402	6.69492	10.642	8.30467	10.3566	10.3729		1.13136	4.89626	1.49006	4.84995	3.29272	1.08236	1.12679	6.96314	5.67867	5.03202		11.7176	8.49518	9.6589	9.12967	10.1056	9.24903
9.67961	9.35219	9.86808	8.48225	7.54655	9.45788	9.70537	9.42696	10.902	10.2085		1.11578	3.36461	6.68014	1.11825	1.18068	4.08026	4.80641	1.83481	1.05359	1.24747		10.9409	10.8634	7.99096	10.7079	9.92943	6.88986	10.6487	8.4821	10.3739	10.2493		1.13287	4.95294	1.48226	4.86586	3.26768	1.08296	1.16379	7.0293	5.58306	5.04341		11.7716	8.38239	9.65703	9.25288	10.0872	9.23649
9.73636	9.36417	9.79876	8.63269	7.36699	9.52171	9.72824	9.22471	10.6144	10.3287		1.11771	3.32822	6.69151	1.1182	1.18962	4.15768	4.8385	1.81793	1.0617	1.24546		9.56959	10.8559	7.99612	10.7684	9.66851	6.75861	10.7173	8.3851	10.4018	10.173		1.12803	4.98711	1.48595	4.90215	3.23951	1.07789	1.16043	7.0695	5.67202	5.14239		11.8744	8.3886	9.73578	8.82139	10.1685	9.28917
9.71716	9.50659	9.82024	8.63282	7.20592	9.45491	9.78918	9.31383	10.7421	10.1234		1.11456	3.3598	6.68667	1.12078	1.18348	4.22026	4.89793	1.83788	1.06209	1.24371		9.95345	10.6725	8.00146	10.7075	9.93837	6.69406	10.7664	8.26111	10.3821	10.247		1.13385	4.93307	1.49636	4.87282	3.23061	1.0772	1.16327	7.05634	5.58778	5.05557		11.52	8.40632	9.69872	9.12277	10.0821	9.27256
9.6171	9.569	9.81854	8.66799	6.76087	9.48112	9.75792	9.38399	10.8442	10.2064		1.11552	3.35646	6.70194	1.12162	1.17495	4.27774	4.91134	1.85155	1.05613	1.24072		10.8839	10.8613	8.0418	10.7742	9.91639	6.79349	10.7823	8.50016	10.4135	10.3241		1.12607	4.93836	1.49756	4.89376	3.19401	1.08003	1.16398	7.06405	5.72954	5.06688		11.7442	8.36142	9.59403	8.92651	10.0965	9.27138
9.66052	9.53511	9.85523	8.69482	6.90634	9.28982	9.77482	9.20598	10.6214	10.2648		1.11403	3.3687	6.69287	1.11997	1.18001	4.30665	4.97337	1.86139	1.05282	1.24036		10.2921	10.8959	8.01892	10.747	9.93428	6.65233	10.7506	8.50258	10.376	10.3403		1.13176	4.92593	1.48708	4.84605	3.19047	1.07975	1.13524	7.12213	5.65379	5.04541		11.7096	8.48253	9.68676	9.02138	10.1667	9.31182
9.64822	9.41677	9.83028	8.67694	6.79164	9.36838	9.5526	9.34923	10.7192	10.2362		1.11621	3.34051	6.68936	1.12076	1.17647	4.3456	4.8883	1.83464	1.05542	1.23931		10.2821	10.8338	7.99923	10.812	9.80094	6.87186	10.7404	8.42268	10.3779	10.3846		1.1317	4.98184	1.49479	4.81934	3.17558	1.07661	1.16152	7.13985	5.84834	5.02203		11.6962	8.46468	9.62352	9.12709	10.0845	9.28582
9.56668	9.42241	9.83965	8.7016	6.85599	9.60208	9.67204	9.40379	10.7308	10.272		1.11393	3.41971	6.70163	1.11933	1.19861	4.37157	4.96521	1.85266	1.05711	1.24246		9.60882	10.7636	7.93803	10.7886	9.64191	6.55403	10.7497	8.26296	10.4155	10.3547		1.12749	4.97882	1.4884	4.78128	3.16158	1.07703	1.13932	7.08032	5.86729	5.11944		11.7272	8.44001	9.66049	8.84297	10.1362	9.28937
9.59394	9.45332	9.76356	8.73473	6.73059	9.36261	9.6618	9.46401	10.8794	10.165		1.11604	3.42256	6.70057	1.11984	1.18055	4.39035	4.94747	1.85502	1.05871	1.24187		9.89372	10.7381	7.8917	10.8197	9.79479	6.75392	10.7702	8.36057	10.4474	10.3598		1.13175	5.05419	1.48479	4.74425	3.14656	1.07681	1.14804	7.14387	6.03289	5.05145		11.6131	8.42911	9.68251	8.62074	10.0844	9.28276
9.62239	9.50599	9.85085	8.75963	6.61081	9.33173	9.77367	9.40786	10.6391	10.2837		1.11289	3.42381	6.77032	1.11784	1.18577	4.39907	4.90075	1.84155	1.05496	1.24133		9.47734	10.6763	7.84596	10.7567	9.70791	6.59498	10.7828	8.43926	10.3988	10.365		1.12576	5.12145	1.48559	4.71526	3.10616	1.08075	1.20469	7.13117	6.07273	5.11774		11.6819	8.4169	9.73191	8.96956	10.1733	9.30177
9.5642	9.50368	9.87853	8.78005	6.45837	9.5686	9.70442	9.52089	10.7138	10.1848		1.1123	3.40141	6.73664	1.1179	1.17043	4.41438	4.9665	1.82999	1.05555	1.24291		10.629	10.7493	7.80173	10.7821	9.85817	7.14229	10.7642	8.42834	10.4167	10.2951		1.1269	5.11274	1.4968	4.67343	3.11318	1.08052	1.12995	7.1261	5.95354	5.11382		12.061	8.47201	9.70224	8.99739	10.0774	9.32664
9.41838	9.53347	9.88784	8.80184	6.6439	9.36774	9.58094	9.31019	10.8188	10.2548		1.11174	3.39812	6.70431	1.11776	1.19768	4.4109	5.01743	1.85408	1.0591	1.24164		9.64453	10.8161	7.73268	10.8294	9.74203	6.83608	10.7087	8.43048	10.4278	10.3317		1.13077	5.11224	1.4966	4.64403	3.10202	1.08031	1.14743	7.14098	5.99605	5.05931		11.7724	8.38821	9.66851	8.7507	10.1267	9.3417
9.65001	9.37318	9.90509	8.79429	7.15353	9.29922	9.57596	9.55113	10.6414	10.2585		1.11276	3.40983	6.7432	1.11429	1.20469	4.40287	4.92697	1.87472	1.05501	1.24344		9.9019	10.8349	7.73241	10.8524	9.98099	7.21935	10.7353	8.54181	10.4624	10.3395		1.12902	5.09534	1.48635	4.60848	3.12414	1.08659	1.15794	7.10152	5.93049	5.10518		11.8684	8.38631	9.67938	8.89732	10.0941	9.32221
9.66012	9.47659	9.82535	8.80354	6.56753	9.46773	9.66524	9.46772	10.6142	10.233		1.107	3.42785	6.76758	1.11617	1.18556	4.39284	4.94477	1.84346	1.05533	1.24245		9.73232	10.7312	7.67428	10.8325	9.73781	7.18252	10.7309	8.32566	10.437	10.3739		1.13064	5.0946	1.49683	4.5665	3.13898	1.07864	1.15411	7.13888	6.20026	5.16132		11.8096	8.44282	9.57963	8.77084	10.0459	9.27672
9.7153	9.44343	9.89033	8.78702	6.80919	9.39742	9.68646	9.52568	10.9233	10.2159		1.11146	3.41742	6.7248	1.11515	1.20416	4.38966	4.96143	1.84049	1.05238	1.24041		9.93317	10.8458	7.65155	10.8998	9.92151	7.18414	10.6713	8.432	10.4226	10.4904		1.13204	5.08494	1.49375	4.54821	3.14274	1.08291	1.13729	7.09703	6.21231	5.11583		12.0506	8.42053	9.62373	8.59107	10.1179	9.26702
9.75372	9.4173	9.83691	8.83994	6.47361	9.54274	9.61919	9.4303	10.8308	10.2899		1.10866	3.40406	6.75657	1.11431	1.20038	4.39363	4.97731	1.85817	1.05011	1.2392		10.4906	10.7151	7.58731	10.9837	10.0169	7.25104	10.696	8.44379	10.4176	10.6334		1.13211	5.07556	1.49584	4.54152	3.15041	1.0774	1.13772	7.13411	6.18441	5.06862		11.6987	8.41011	9.66205	8.7186	10.0576	9.27265
9.5035	9.4537	9.87693	8.86141	6.80292	9.47992	9.76341	9.45683	10.8533	10.31		1.10815	3.45689	6.76021	1.11395	1.19032	4.38665	4.93813	1.86472	1.05459	1.23823		9.93517	10.5642	7.47835	10.8821	9.96766	7.18783	10.7152	8.30784	10.453	10.7626		1.13288	5.04481	1.48934	4.53229	3.16606	1.08637	1.14873	7.12549	6.22825	5.12932		11.6087	8.35098	9.66524	8.79007	10.0231	9.24449
9.60773	9.37274	9.81381	8.76559	6.93615	9.43157	9.6461	9.45988	10.9294	10.1939		1.10551	3.43336	6.74184	1.11514	1.19828	4.39651	4.99649	1.85682	1.05212	1.23859		10.2193	10.7559	7.46954	10.821	9.98196	6.83063	10.703	8.30661	10.4521	10.677		1.13751	5.02934	1.49497	4.53645	3.17229	1.08007	1.1147	7.14717	5.97356	5.11277		11.647	8.37505	9.63599	8.7706	9.98546	9.33998
9.62889	9.39093	9.87893	8.95195	7.14725	9.55793	9.59512	9.43904	10.8944	10.2843		1.10457	3.43058	6.73936	1.11465	1.20009	4.39006	4.93739	1.85943	1.05373	1.24055		10.107	10.7082	7.43907	10.8404	10.0279	6.93931	10.744	8.448	10.4423	10.6682		1.12974	4.99995	1.49451	4.53528	3.19931	1.08966	1.04844	7.13341	5.97664	5.12335		11.3664	8.43587	9.62391	8.82856	10.0478	9.27044
9.66664	9.3545	9.85646	8.82896	6.93072	9.58633	9.52598	9.42138	10.7723	10.2973		1.10618	3.46477	6.78975	1.11258	1.17934	4.38844	4.94321	1.85831	1.06066	1.23777		10.4731	10.7468	7.45015	10.8445	9.86852	6.77402	10.7848	8.40425	10.3634	10.7845		1.12509	5.0184	1.49609	4.54078	3.23208	1.09051	1.03844	7.1912	5.65879	5.12293		11.3854	8.38662	9.65826	8.62663	10.0337	9.26769
9.56532	9.52349	9.91342	8.90829	7.27564	9.33105	9.68029	9.42727	10.6957	10.1997		1.10466	3.43579	6.74609	1.11377	1.18462	4.3855	4.9139	1.86968	1.06136	1.23328		10.0755	10.738	7.43118	10.831	9.85985	6.87232	10.797	8.14576	10.354	10.7634		1.13323	5.05512	1.49979	4.55443	3.27269	1.08606	1.12685	7.20989	5.58863	5.11208		10.0143	8.33871	9.66137	8.67296	10.0833	9.29535
9.56117	9.34991	9.86138	8.81659	6.87384	9.65881	9.54979	9.3494	10.646	10.2325		1.10521	3.42076	6.72698	1.11509	1.17455	4.38958	4.9207	1.88493	1.0568	1.23048		10.0178	10.6499	7.41397	10.8697	9.86705	6.41358	10.792	8.45787	10.3405	10.827		1.13007	5.14438	1.49443	4.58115	3.33352	1.08113	1.13778	7.23501	5.37066	5.11259		9.87863	8.47632	9.64135	8.44526	10.1068	9.31347
9.62256	9.47898	9.82902	8.90124	7.1426	9.62687	9.69096	9.29975	10.9387	10.2175		1.10573	3.45939	6.75844	1.11284	1.1937	4.39998	4.88946	1.83078	1.05954	1.22975		10.4885	10.5482	7.35389	10.7708	9.51558	6.34035	10.828	8.40861	10.4032	10.8252		1.1284	5.16651	1.49826	4.61861	3.38962	1.08205	1.15279	7.27333	5.34563	5.17169		9.83793	8.3755	9.62969	8.74899	10.1303	9.33803
9.48823	9.51798	9.87038	8.86688	7.12689	9.56486	9.73505	9.35144	10.7889	10.2579		1.10183	3.48839	6.77463	1.11376	1.18211	4.39287	4.92006	1.86466	1.06063	1.22715		10.0642	10.7083	7.32988	10.8051	9.71561	6.49674	10.8184	8.35719	10.4903	10.8013		1.12434	5.18326	1.49693	4.66342	3.45683	1.08044	1.13429	7.28582	5.19513	5.1214		10.2236	8.38992	9.73178	8.61119	10.0998	9.27138
9.6755	9.30899	9.86539	8.95155	7.41697	9.42614	9.63751	9.30555	10.9578	10.2653		1.10424	3.48616	6.72132	1.11358	1.17246	4.39217	4.8929	1.85629	1.05564	1.22481		10.4056	10.6318	7.39124	10.8095	9.96656	6.28062	10.8094	8.30762	10.345	10.7707		1.12431	5.25489	1.49148	4.69968	3.51782	1.07676	1.12683	7.42665	5.23917	5.20542		10.0479	8.3348	9.67599	8.75078	10.0677	9.27902
9.56706	9.44749	9.85322	8.94309	7.69866	9.43655	9.59073	9.24187	11.0841	10.2517		1.102	3.49792	6.72963	1.11294	1.19325	4.40069	4.97572	1.88258	1.05963	1.22456		10.394	10.557	7.35506	10.8214	10.0408	6.57829	10.851	8.34175	10.3365	10.6762		1.12458	5.21693	1.50024	4.74387	3.54539	1.07629	1.10281	7.40738	5.34245	5.17769		10.0394	8.3587	9.64346	8.74607	10.0951	9.2618
9.65603	9.36782	9.83717	8.97236	7.30683	9.58056	9.74097	9.32713	10.8628	10.3265		1.10029	3.44375	6.76996	1.11166	1.18167	4.40726	4.91576	1.86258	1.05777	1.2228		10.1381	10.7588	7.34352	10.8708	9.60582	6.17658	10.8536	8.39083	10.3586	10.8073		1.13121	5.19827	1.49689	4.75401	3.58733	1.08106	1.14577	7.14248	5.25589	5.1607		10.0951	8.34839	9.64137	8.7111	9.9612	9.25876
9.67464	9.3495	9.84802	8.97759	7.09107	9.61886	9.68589	9.52087	10.9172	10.2378		1.09614	3.45472	6.7542	1.11248	1.16448	4.41044	4.93117	1.84573	1.05668	1.2182		11.315	10.7295	7.35411	10.7989	10.0434	6.81027	10.8534	8.15262	10.3304	10.9238		1.12631	5.22459	1.4991	4.77366	3.61505	1.07789	1.16914	6.97989	5.42429	5.1969		10.1782	8.33685	9.67728	8.81622	9.99415	9.28202
9.52661	9.33161	9.80418	8.99344	7.36714	9.31479	9.47411	9.63604	10.7506	10.2874		1.10014	3.46462	6.79656	1.11236	1.18959	4.41769	4.8781	1.87555	1.05868	1.21597		9.85616	10.4972	7.35373	10.9363	9.90419	6.68888	10.8524	8.37146	10.3004	10.965		1.13045	5.22244	1.48801	4.76105	3.68382	1.07989	1.1386	7.05099	5.41472	5.30461		9.97534	8.33165	9.72961	8.72412	10.0568	9.27514
9.59108	9.51101	9.80992	8.96917	7.19706	9.80311	9.57941	9.60086	10.7377	10.1336		1.09974	3.5177	6.8218	1.11255	1.17576	4.41742	4.99632	1.85834	1.05712	1.21399		10.3217	10.5869	7.39554	10.8912	9.87689	6.50469	10.8279	8.23619	10.3502	10.8354		1.12702	5.21723	1.49177	4.77385	3.74524	1.07624	1.11761	7.06706	5.47771	5.28388		9.99283	8.37163	9.72707	8.85285	9.96647	9.26654
9.53473	9.40334	9.90505	9.04303	7.36157	9.38833	9.57932	9.54025	10.9686	10.1752		1.09831	3.5319	6.76076	1.11246	1.18478	4.41921	4.92141	1.86963	1.05289	1.21581		10.1636	10.6599	7.45629	10.8891	9.92527	6.74993	10.8143	8.34749	10.3453	11.0758		1.12664	5.27239	1.48774	4.79528	3.79831	1.08199	1.10089	7.14457	5.57253	5.22077		10.2478	8.33171	9.77681	8.58016	9.97401	9.24283
9.6365	9.20041	9.88892	9.09387	7.07418	9.1907	9.32478	9.5598	10.9921	10.1952		1.09994	3.5099	6.78363	1.11301	1.20137	4.43177	4.92241	1.84068	1.05533	1.21829		9.33027	10.5144	7.50361	10.8469	9.97849	6.90727	10.7852	8.19598	10.3216	11.0414		1.13184	5.27141	1.5	4.78465	3.81668	1.07955	1.13197	7.25008	5.85793	5.20441		10.1869	8.26011	9.73081	8.79687	10.0091	9.2568
9.50741	9.36857	9.90382	9.03902	7.62684	9.56396	9.57071	9.54982	10.6575	10.1862		1.09885	3.50532	6.87054	1.11296	1.18083	4.43231	5.01752	1.8471	1.05945	1.21556		9.97289	10.7423	7.55645	10.8967	10.0154	6.97257	10.7944	8.35662	10.3421	10.9662		1.13396	5.24551	1.50182	4.74403	3.82168	1.07533	1.11157	7.25296	5.84613	5.21089		10.3706	8.3142	9.74009	8.5846	10.0407	9.28048
9.39675	9.29409	9.90881	9.08662	6.97973	9.38749	9.66259	9.50348	10.6636	10.237		1.09899	3.50099	6.87651	1.1125	1.16828	4.42568	4.89802	1.84251	1.05882	1.21635		9.0577	10.6749	7.68461	10.7931	10.0597	6.75515	10.7868	8.42999	10.3492	11.1561		1.12214	5.304	1.49928	4.73289	3.82789	1.07443	1.13418	7.1958	5.94417	5.19438		10.1883	8.36942	9.68361	8.62811	10.0268	9.25066
9.59148	9.3295	9.89437	9.02352	7.50956	9.64415	9.42349	9.68491	10.6403	10.225		1.09567	3.52386	6.88212	1.11389	1.17392	4.43653	4.9288	1.86123	1.05881	1.21503		9.29229	10.531	7.7935	10.8322	9.92	6.91009	10.8022	8.19691	10.3945	11.152		1.12909	5.30441	1.49302	4.72149	3.82334	1.08077	1.13753	7.24283	6.25244	5.17672		10.0791	8.38742	9.74705	8.46256	9.90885	9.24708
9.44418	9.40568	9.86423	9.05591	7.03431	9.52642	9.53867	9.551	10.9904	10.2229		1.09294	3.51534	6.9754	1.1126	1.19555	4.42844	4.9266	1.85176	1.0585	1.21705		10.2308	10.6423	7.94363	10.8511	10.0721	7.11686	10.8509	8.33173	10.3126	11.0428		1.12945	5.25964	1.50667	4.7039	3.84056	1.08598	1.126	7.24482	6.32831	5.2217		10.0446	8.30555	9.72942	8.48065	9.90938	9.2361
9.61785	9.36615	9.8695	9.03782	6.86246	9.3782	9.90886	9.66015	10.7407	10.1718		1.1	3.49254	6.98536	1.1137	1.18182	4.42901	4.90542	1.84574	1.0594	1.21696		10.6623	10.7143	8.00456	10.8295	9.92289	6.97042	10.8468	8.46698	10.3575	11.0457		1.13251	5.30352	1.4928	4.68146	3.83306	1.06891	1.13991	7.19024	6.53595	5.23523		10.1747	8.32625	9.65923	8.51758	10.0012	9.23374
9.60943	9.40512	9.93304	8.9862	6.80217	9.62225	9.74953	9.61977	11.0223	10.1448		1.09499	3.53274	6.96781	1.11341	1.19069	4.42713	4.87061	1.85311	1.06188	1.2189		9.91401	10.5975	8.08158	10.8626	10.1577	6.49739	10.8259	8.30439	10.3711	11.245		1.12474	5.29538	1.50244	4.67963	3.84874	1.07747	1.11614	7.17615	6.59043	5.31592		10.064	8.29295	9.67681	8.55576	9.9563	9.2528
9.47945	9.25579	9.91758	9.0739	7.0672	9.68311	9.4176	9.65439	10.9786	10.1371		1.09671	3.55999	6.98645	1.1124	1.19625	4.43873	4.83261	1.85744	1.06236	1.21808		9.57531	10.6807	8.07726	10.8836	9.81466	6.56195	10.8677	8.31312	10.3245	11.0597		1.12586	5.3022	1.50397	4.66557	3.90204	1.08482	1.13243	7.19139	6.43775	5.31239		10.126	8.33713	9.6291	8.59162	10.0371	9.27934
9.63283	9.36054	9.87104	9.04869	6.63233	9.39819	9.61069	9.53208	10.6858	10.1912		1.09446	3.49847	7.02957	1.11162	1.1862	4.43715	4.86736	1.84506	1.05932	1.21526		9.51675	10.5868	8.11857	10.894	9.80033	7.06156	10.8216	8.33159	10.2933	11.194		1.12955	5.28897	1.50084	4.63458	3.91029	1.08004	1.15887	7.12316	6.25654	5.32281		10.2089	8.29945	9.64192	8.473	9.94565	9.25093
9.40935	9.43393	9.89187	9.0622	6.91838	9.66456	9.94595	9.63588	10.8578	10.1913		1.09649	3.57425	6.9764	1.11347	1.17283	4.43888	4.89046	1.86204	1.05834	1.21477		10.3848	10.515	8.09657	10.8668	10.0366	6.66824	10.8344	8.20686	10.3544	11.1816		1.13161	5.22882	1.50677	4.62657	3.8801	1.08916	1.14245	7.13917	6.19174	5.31719		10.1321	8.32744	9.68404	8.30202	9.89624	9.21968
9.56552	9.32058	9.88502	8.95051	6.78952	9.62284	9.53748	9.59373	10.8493	10.2592		1.09607	3.56381	6.96752	1.11458	1.18113	4.4223	4.93683	1.85722	1.05924	1.21155		9.27291	10.5669	8.03505	10.8723	9.69375	6.65028	10.8396	8.4189	10.321	11.2021		1.13818	5.20284	1.50528	4.64163	3.85352	1.08348	1.13347	7.13699	6.13206	5.34026		10.0493	8.31903	9.70171	8.41965	9.95227	9.23324
9.5732	9.3018	9.86851	9.04638	6.57529	9.70927	9.51869	9.48855	10.8471	10.1974		1.09599	3.5696	6.95691	1.11352	1.16856	4.43401	4.89393	1.84959	1.05616	1.21484		9.4672	10.5723	7.96345	10.9047	9.73158	6.96275	10.8734	8.49617	10.3108	11.2972		1.13106	5.20621	1.50662	4.62788	3.83775	1.09364	1.1251	7.07732	5.94634	5.29392		10.0435	8.34206	9.71642	8.3149	9.96119	9.25265
9.59522	9.36337	9.81628	8.99797	6.46964	9.46368	9.79888	9.64373	10.8472	10.2501		1.08994	3.56228	6.97766	1.11389	1.18787	4.43975	4.92262	1.83731	1.05892	1.21516		9.60749	10.5248	7.94792	10.8747	9.64095	7.0491	10.8506	8.40394	10.3141	11.4705		1.12901	5.15852	1.50709	4.65047	3.84202	1.08765	1.13614	7.02351	5.83199	5.28498		10.0587	8.32158	9.71461	8.29666	9.98569	9.23697
9.57352	9.34377	9.83624	8.93429	6.83855	9.68149	9.75943	9.55495	10.8136	10.1706		1.09057	3.56427	6.92154	1.11622	1.18399	4.42749	4.91617	1.83248	1.06259	1.21615		9.87022	10.6917	7.85706	10.8812	9.76243	6.81528	10.8384	8.28299	10.2884	11.3305		1.13082	5.17101	1.50521	4.65544	3.7954	1.07835	1.14034	7.16261	5.93608	5.20601		10.1934	8.31301	9.69671	8.41349	9.93401	9.23351
9.67268	9.27586	9.78185	8.94059	6.82756	9.49194	9.46053	9.60261	10.8134	10.2325		1.09274	3.55591	6.92009	1.11706	1.18623	4.43972	4.85771	1.83783	1.06415	1.21604		10.6657	10.576	7.79844	10.9228	10.0055	6.99086	10.7999	8.33439	10.3257	11.3788		1.12298	5.1601	1.50835	4.67309	3.74245	1.08576	1.12421	7.16123	5.81808	5.20585		10.0808	8.33615	9.7558	8.39936	9.81667	9.26245
9.55329	9.42374	9.80265	9.05688	6.77584	9.41476	9.50557	9.58169	10.9651	10.1888		1.09204	3.57866	6.93319	1.11731	1.19182	4.45402	4.90812	1.84187	1.06452	1.21778		10.7698	10.5336	7.67511	10.9126	9.76244	7.16047	10.7954	8.34729	10.3559	11.4707		1.13158	5.15755	1.50741	4.66489	3.73174	1.07849	1.12746	7.07271	5.70652	5.1869		10.0336	8.28651	9.69691	8.47525	9.90386	9.23468
9.57634	9.22761	9.84469	8.96347	6.78769	9.61177	9.77757	9.61557	11.0323	10.1371		1.09165	3.62079	6.88382	1.1182	1.18559	4.46091	4.90155	1.87492	1.06092	1.21853		10.0981	10.702	7.64793	10.886	10.0364	7.12202	10.8037	8.20545	10.3446	11.4368		1.12246	5.15233	1.51261	4.66876	3.72737	1.08723	1.12446	7.16316	5.75872	5.11314		9.95309	8.3636	9.6052	8.3506	9.91985	9.24039
9.53057	9.42229	9.86288	8.97449	6.75791	9.52636	9.28796	9.64266	10.9393	10.1136		1.09059	3.59765	6.87066	1.11866	1.17423	4.46616	4.98329	1.83774	1.05976	1.214		11.16	10.6727	7.54936	10.9329	9.94028	7.21702	10.7992	8.37997	10.331	11.3781		1.12713	5.21612	1.50485	4.68776	3.72552	1.08558	1.10199	7.17066	5.64247	5.10812		10.1117	8.2677	9.66019	8.34052	9.92757	9.24893
9.34705	9.32562	9.83382	9.00838	6.88723	9.55214	9.469	9.62627	10.7141	10.1662		1.09051	3.60233	6.91172	1.11974	1.17629	4.45106	4.90018	1.85593	1.05837	1.21584		11.2571	10.623	7.50669	10.9148	9.92693	7.05025	10.818	8.4399	10.2994	11.4809		1.1263	5.2069	1.50495	4.68956	3.7143	1.08803	1.12618	7.09146	5.64752	5.0955		10.1381	8.27587	9.67764	8.08151	9.8452	9.25287
9.48554	9.36917	9.86657	9.01113	7.28346	9.50957	9.7274	9.57318	11.0599	10.1865		1.09107	3.59567	6.92083	1.12046	1.19047	4.45796	4.93542	1.83567	1.05662	1.2124		11.4463	10.6281	7.41023	10.8745	10.0158	6.92474	10.8147	8.4289	10.2972	11.505		1.11967	5.24837	1.50685	4.65203	3.70277	1.08037	1.12809	7.16866	5.75551	5.05539		10.1009	8.30243	9.66987	8.3821	9.92414	9.25835
9.2953	9.43289	9.79182	8.98441	7.00349	9.68675	9.54236	9.63613	10.8022	10.1723		1.09129	3.59073	6.87614	1.11941	1.16848	4.45643	4.95179	1.84407	1.05629	1.21174		10.1224	10.4947	7.37708	10.9477	9.95481	6.9462	10.8278	8.33337	10.3302	11.2662		1.12689	5.24634	1.50575	4.64731	3.69273	1.08619	1.11047	7.2111	5.83333	5.00557		10.3571	8.34958	9.63424	8.27551	9.89873	9.24566
9.62858	9.36332	9.86738	9.00675	7.43017	9.65327	9.22258	9.61435	11.0077	10.1367		1.09169	3.60324	6.90471	1.11876	1.16106	4.45802	4.95626	1.83115	1.05824	1.21352		10.528	10.6357	7.36282	10.8899	10.0056	7.15148	10.8114	8.39283	10.2998	11.2764		1.13153	5.27929	1.50643	4.62305	3.68975	1.07952	1.12832	7.14285	5.88938	5.10063		10.3108	8.32936	9.68515	8.43333	9.90652	9.25749
9.40945	9.37247	9.8659	9.03257	7.31507	9.52597	9.48225	9.62841	11.0704	10.1846		1.09316	3.59798	6.91144	1.12037	1.18349	4.47708	5.02533	1.85325	1.05883	1.21634		10.8043	10.7619	7.30832	10.9393	10.0321	7.19259	10.8276	8.39094	10.3092	11.2469		1.12999	5.29953	1.5018	4.60214	3.71262	1.07964	1.10648	7.18762	5.80484	5.00155		9.94305	8.30093	9.64804	8.2958	9.88368	9.26441
9.5177	9.20645	9.92175	9.04312	7.15234	9.64627	9.51142	9.63322	11.1232	10.1593		1.08817	3.6136	6.89468	1.11976	1.18471	4.47331	5.03387	1.84204	1.06148	1.21504		8.71222	10.7576	7.3186	10.9313	10.0644	7.27151	10.8704	8.44583	10.3669	11.3542		1.12282	5.31055	1.50416	4.60185	3.69723	1.08688	1.11405	7.25054	5.79445	5.09668		10.2892	8.32507	9.61584	8.17763	9.85273	9.26855
9.48192	9.25062	9.83445	8.9946	7.42129	9.60286	9.15129	9.60164	11.0282	10.1597		1.08849	3.60188	6.87551	1.11867	1.16509	4.47719	5.10094	1.83933	1.05885	1.21408		10.019	10.6899	7.33462	10.9542	9.97584	7.16563	10.8631	8.33663	10.3668	11.3284		1.12676	5.34386	1.51123	4.58838	3.69747	1.08472	1.13259	7.16013	5.73839	5.00458		10.4136	8.37375	9.64257	8.31948	9.87545	9.28969
9.22205	9.17498	9.87463	8.93484	7.27429	9.64042	9.36862	9.57379	10.9392	10.2135		1.09275	3.57831	6.89255	1.11903	1.17041	4.47846	5.0238	1.86413	1.05985	1.21503		11.2158	10.6258	7.31863	10.9305	10.0569	6.51537	10.8554	8.38926	10.3311	11.4784		1.12902	5.37157	1.50642	4.58461	3.70119	1.08736	1.13954	7.16669	5.87169	4.93291		10.0181	8.3477	9.67061	8.15353	9.8651	9.28312
9.78723	9.25649	9.86463	8.97966	7.41799	9.59634	9.41766	9.61765	11.1093	10.1326		1.08848	3.57979	6.87884	1.11951	1.18907	4.47476	5.06547	1.84689	1.05654	1.21338		11.1139	10.6601	7.43759	11.0357	9.92996	7.13675	10.8537	8.38525	10.2871	11.5427		1.12717	5.38624	1.50834	4.56451	3.70113	1.08542	1.13012	7.31096	6.03412	4.96285		10.1854	8.37205	9.647	8.23828	9.85697	9.27293
9.6561	9.31544	9.81739	8.90456	7.4124	9.5158	9.21755	9.62928	10.9713	10.1438		1.08793	3.62788	6.83978	1.11807	1.18285	4.47858	5.02851	1.84921	1.05722	1.21236		10.8562	10.5933	7.45428	11.041	10.0283	6.91619	10.8493	8.24963	10.2731	11.4417		1.12403	5.40543	1.50578	4.56651	3.71476	1.08335	1.11571	7.2542	5.90301	4.92599		10.3887	8.26033	9.64674	8.03483	9.76184	9.2961
9.3366	9.30417	9.824	8.9363	7.22454	9.51877	9.28732	9.58978	10.8474	10.1176		1.08646	3.62375	6.86439	1.11832	1.17613	4.48085	5.05986	1.85218	1.06108	1.21158		10.0639	10.5387	7.44684	10.9032	10.0215	7.03676	10.8576	8.40738	10.2806	11.5287		1.1276	5.38087	1.51001	4.57104	3.72698	1.09039	1.12488	7.15876	5.82862	4.95385		10.1849	8.28643	9.60781	8.06031	9.88289	9.29398
9.78135	9.30588	9.80992	9.05518	7.41557	9.55423	9.32454	9.5998	11.0618	10.1364		1.08787	3.61805	6.87754	1.11965	1.16684	4.48684	5.06877	1.84153	1.06178	1.2109		11.3016	10.5343	7.51901	10.9272	9.94109	6.65599	10.8949	8.24779	10.237	11.5974		1.11969	5.33602	1.50861	4.58833	3.72261	1.08436	1.13417	7.26315	6.00124	4.94325		10.1486	8.37869	9.62339	8.0946	9.86574	9.30388
9.57014	9.32007	9.8357	8.9947	7.49401	9.69247	9.21181	9.68741	10.8878	10.1418		1.08305	3.66475	6.83866	1.1203	1.16117	4.49884	5.09943	1.85321	1.06006	1.21264		11.5656	10.5347	7.56467	11.0764	10.138	6.65223	10.8857	8.14438	10.2537	11.5845		1.12576	5.34166	1.51271	4.58897	3.7631	1.08662	1.14454	7.28152	5.85926	4.97409		10.4715	8.2412	9.60652	7.98888	9.80427	9.3014
9.40188	9.17913	9.89761	9.03837	7.46597	9.69144	9.25416	9.63793	10.8327	10.1795		1.08605	3.64285	6.85223	1.1195	1.18904	4.50464	5.05584	1.82349	1.05504	1.20925		10.2911	10.4596	7.55691	10.9511	10.0821	7.04235	10.936	8.29734	10.2013	11.5954		1.12726	5.37245	1.51058	4.59043	3.77618	1.08308	1.13109	7.25332	6.03598	5.01167		10.2063	8.21899	9.59454	8.00855	9.85977	9.2834
9.7699	9.25175	9.85085	8.98301	6.96721	9.60061	9.29602	9.65869	10.7868	10.1593		1.08518	3.65836	6.87439	1.11873	1.16879	4.49446	5.07568	1.83585	1.06291	1.20422		9.35172	10.5646	7.66049	10.9094	9.9836	7.16915	10.983	8.31148	10.1986	11.8084		1.12796	5.37687	1.51692	4.57287	3.80084	1.07986	1.13448	7.3203	6.02657	4.98178		9.9649	8.26219	9.60654	7.89835	9.83054	9.2744
9.64215	9.15992	9.87379	9.00982	7.27561	9.47452	9.52634	9.58804	10.6473	10.142		1.08526	3.65338	6.86622	1.11838	1.19625	4.50583	5.0752	1.85349	1.06177	1.2033		9.7117	10.5859	7.69567	10.9885	10.1251	6.86526	10.9958	8.41154	10.1765	11.878		1.12349	5.43395	1.50508	4.58424	3.83887	1.08087	1.12802	7.34229	5.99869	5.00174		10.1229	8.34328	9.58859	7.8283	9.81019	9.26492
9.57996	9.27621	9.81037	9.0484	7.61007	9.69432	9.27809	9.67572	10.9902	10.1137		1.08223	3.64295	6.87354	1.11419	1.18502	4.4954	5.08704	1.85356	1.05762	1.20597		11.2847	10.5478	7.70308	11.0305	9.91804	7.24678	11.0018	8.53905	10.2115	11.8101		1.11854	5.4212	1.51271	4.59091	3.87013	1.08987	1.12926	7.30431	5.85659	5.00317		9.98577	8.26867	9.59998	8.04618	9.75025	9.30033
9.82854	9.23554	9.87136	8.96917	7.55313	9.61701	9.20083	9.66795	10.9564	10.1326		1.08456	3.65573	6.8854	1.11436	1.18305	4.47453	5.1224	1.8731	1.06036	1.19993		11.1754	10.5312	7.77934	10.9536	10.0355	6.77915	11.0417	8.39946	10.1936	11.6998		1.12782	5.42585	1.51808	4.57711	3.92469	1.08905	1.11831	7.30985	5.80507	5.03439		9.96836	8.30483	9.51048	7.97057	9.80688	9.33108
9.58833	9.20833	9.83784	9.0177	7.14729	9.59212	9.33749	9.60527	10.7509	10.0944		1.08488	3.66693	6.87437	1.11311	1.18352	4.47923	5.12543	1.83401	1.06042	1.19928		9.81758	10.3998	7.8494	10.9758	9.97476	6.90291	11.0153	8.46498	10.3179	11.7067		1.12669	5.40782	1.50796	4.54821	3.95379	1.0811	1.11002	7.3456	5.87939	5.03186		10.2268	8.36732	9.60842	7.95393	9.80016	9.33054
9.35822	9.28279	9.88184	9.05252	7.2307	9.74438	9.06644	9.7301	10.9005	10.1081		1.08125	3.6324	6.85871	1.1103	1.17547	4.47483	5.06637	1.85667	1.06193	1.19773		9.96685	10.5363	7.89731	11.0351	10.1814	6.93496	11.0222	8.45696	10.257	11.8752		1.12226	5.43016	1.51117	4.56477	4.03031	1.09268	1.10488	7.27745	5.78129	5.04454		10.1253	8.19091	9.6388	7.85148	9.76624	9.32665
9.64223	9.16356	9.84733	8.99349	7.04113	9.63532	9.45068	9.64347	10.8615	10.1287		1.082	3.64269	6.86169	1.11047	1.19454	4.4787	5.04692	1.86245	1.05822	1.19402		9.74295	10.6396	7.96385	10.9864	9.98936	6.89033	10.9936	8.4675	10.2459	12.0171		1.12543	5.43109	1.50319	4.55832	4.07664	1.08787	1.11893	7.25384	5.69327	5.07305		9.90786	8.29928	9.66505	7.79138	9.77131	9.31991
9.56089	9.21452	9.77988	9.03412	7.05024	9.58045	9.33276	9.64297	10.9449	10.1349		1.0821	3.68419	6.85259	1.10858	1.18278	4.49128	5.09307	1.85337	1.05499	1.19457		11.0974	10.5748	7.99625	10.971	10.059	7.00274	10.9964	8.48893	10.2816	11.9398		1.12096	5.45381	1.51098	4.53747	4.08952	1.07562	1.17168	7.31219	5.8397	5.02553		9.88688	8.36555	9.69333	7.91822	9.76218	9.34924
9.41537	9.17886	9.79392	9.00778	7.30305	9.63207	9.25955	9.63852	10.985	10.1089		1.08084	3.68056	6.85746	1.10738	1.17085	4.51382	5.07086	1.859	1.06384	1.19514		10.5208	10.4956	8.04235	10.9749	10.1857	7.1123	10.9704	8.24353	10.2593	12.2941		1.12452	5.54502	1.51373	4.5324	4.14123	1.08565	1.12551	7.24213	5.69355	5.13129		9.97313	8.33687	9.64169	7.88495	9.76766	9.36392
9.50278	9.26434	9.78409	9.11314	7.38725	9.5762	9.16886	9.60953	11.0652	10.0953		1.08035	3.62763	6.87044	1.10682	1.17718	4.52175	5.06925	1.86751	1.06116	1.19841		10.6979	10.6176	8.07952	11.0413	9.90495	7.16517	10.948	8.50957	10.2417	12.2413		1.1182	5.57918	1.50678	4.54826	4.20791	1.0843	1.12935	7.18205	5.73348	5.09636		9.93176	8.32595	9.62941	7.82334	9.75103	9.38093
9.43785	9.24152	9.79814	9.08083	7.41269	9.5566	9.30296	9.63115	10.7944	10.0809		1.08157	3.6537	6.88828	1.10497	1.18422	4.51683	5.07543	1.84076	1.06147	1.20034		10.8239	10.5406	8.1888	10.9151	10.0402	7.02899	10.9289	8.41677	10.2515	12.2176		1.13053	5.5835	1.51619	4.53158	4.25477	1.08251	1.11865	7.21591	5.64435	5.12396		9.84186	8.27875	9.65727	7.79823	9.8126	9.41389
9.32304	9.21352	9.7709	9.20195	7.05153	9.78033	9.41764	9.48791	10.9338	10.1224		1.08234	3.67596	6.85156	1.1056	1.19246	4.50689	5.01669	1.8502	1.06266	1.19819		11.0985	10.5845	8.19954	10.9779	10.0165	6.92419	10.9686	8.55554	10.2443	12.2701		1.12061	5.57407	1.51237	4.59331	4.30626	1.08267	1.1472	7.24763	5.66292	5.08134		10.0066	8.22991	9.68627	7.71569	9.79745	9.42852
9.39342	9.18471	9.76465	9.20787	7.05527	9.55603	9.46544	9.71523	11.0209	10.1455		1.08225	3.68139	6.86712	1.10441	1.17422	4.51029	5.04113	1.86398	1.06307	1.19659		10.8484	10.4837	8.16984	10.9635	10.0497	6.67189	10.969	8.28579	10.2239	12.1633		1.12483	5.58922	1.51131	4.57064	4.37233	1.08524	1.12664	7.16944	5.91059	5.05789		10.1195	8.2149	9.65792	7.95857	9.7572	9.37947
9.53538	9.19481	9.86169	9.17638	7.19756	9.7752	9.25354	9.60136	10.9422	10.0921		1.08125	3.70606	6.86221	1.10494	1.17544	4.50815	5.01096	1.85378	1.06098	1.1967		10.1546	10.5697	8.18154	11.014	10.1633	6.80699	10.9211	8.22497	10.2173	12.1004		1.12254	5.53567	1.51337	4.58776	4.41759	1.08823	1.13424	7.18691	5.8543	5.08437		9.89185	8.32557	9.68473	7.78387	9.81768	9.37704
9.38351	9.25585	9.81597	9.17664	7.305	9.56939	9.42576	9.68336	10.9137	10.07		1.07975	3.70584	6.85578	1.10473	1.17814	4.51288	5.08049	1.86664	1.05762	1.19978		10.8773	10.5444	8.19855	11.2079	10.0569	7.13267	10.9357	8.46049	10.2102	12.2129		1.1189	5.4954	1.51862	4.58064	4.39399	1.0877	1.13197	7.25587	5.91707	5.09491		10.1397	8.22516	9.61733	7.88198	9.82955	9.42066
9.51129	9.09505	9.79136	9.15753	7.15854	9.7586	9.24381	9.6207	10.9403	10.1194		1.07732	3.69481	6.85522	1.10384	1.19012	4.52346	5.05588	1.83655	1.06046	1.19969		9.52044	10.5324	8.1981	11.2775	10.2032	7.02995	10.8978	8.47643	10.2396	12.3531		1.12407	5.51221	1.51	4.60247	4.37236	1.08592	1.15289	7.18502	6.00102	5.06476		9.95957	8.20342	9.66135	7.82167	9.80235	9.37223
9.51882	9.0283	9.81486	9.13534	6.97269	9.50951	9.2815	9.66245	10.9652	10.1549		1.07745	3.71204	6.85208	1.10387	1.17172	4.53627	5.03589	1.8549	1.06196	1.1979		10.1672	10.391	8.15948	11.2462	10.1203	7.16361	10.8446	8.50508	10.2287	12.2964		1.12702	5.49548	1.51986	4.59417	4.36128	1.08744	1.17632	7.18217	6.06357	5.04657		9.95214	8.3223	9.70159	7.57912	9.7434	9.36065
9.47797	9.1417	9.80172	9.20765	7.42728	9.73421	9.42277	9.6356	11.0214	10.0913		1.07862	3.70536	6.87471	1.10447	1.19042	4.53971	5.05675	1.8576	1.06285	1.19001		11.1061	10.4969	8.05725	11.1663	10.0467	6.90096	10.758	8.54136	10.2337	12.2894		1.13272	5.50129	1.5091	4.57316	4.33799	1.0854	1.11664	7.30205	6.14781	5.13139		9.93478	8.2836	9.7222	7.67731	9.86382	9.36474
9.50224	9.04264	9.8564	9.22595	7.19179	9.56319	9.32483	9.62922	11.0165	10.1291		1.07913	3.67248	6.8464	1.10267	1.16766	4.54326	5.06436	1.86403	1.06219	1.18613		10.4754	10.592	8.03391	11.2939	10.1255	7.103	10.7553	8.25062	10.2198	12.3963		1.1222	5.47097	1.51368	4.58897	4.31091	1.08357	1.11964	7.26332	6.26534	5.08624		10.0105	8.1972	9.7629	7.71656	9.72531	9.30875
9.59614	9.16357	9.84902	9.26949	7.55264	9.61066	9.23234	9.70537	10.7517	10.1085		1.07603	3.7337	6.84328	1.10213	1.1979	4.54859	5.03901	1.84764	1.06062	1.18296		11.3138	10.4325	7.98324	11.3538	9.88115	7.01283	10.6698	8.5309	10.2388	12.5057		1.12505	5.45763	1.50432	4.62742	4.33618	1.07705	1.10034	7.19592	6.28078	5.02391		10.0293	8.18628	9.70922	7.83355	9.85247	9.32461
9.23237	9.3054	9.82934	9.2379	7.09327	9.65551	9.33969	9.67521	10.9024	10.0421		1.07591	3.76524	6.86668	1.10358	1.16935	4.54856	5.07013	1.83337	1.06088	1.1888		10.7315	10.3762	7.9486	11.1665	10.1066	7.02002	10.575	8.41081	10.1982	12.4258		1.12423	5.49072	1.50854	4.60965	4.31763	1.07944	1.1192	7.25159	6.24852	4.98968		10.0352	8.24139	9.69984	7.54745	9.86815	9.35654
9.54643	9.08388	9.78241	9.2174	7.20144	9.71739	9.53486	9.66253	10.8841	10.0543		1.0741	3.77673	6.86344	1.10379	1.18242	4.48462	5.03336	1.86157	1.05884	1.18781		9.77111	10.4819	7.91173	11.2462	9.96357	6.63715	10.6428	8.44167	10.244	12.1811		1.11904	5.5052	1.5193	4.63471	4.33571	1.08062	1.10954	7.24621	6.36312	5.05177		9.97283	8.31361	9.65949	7.59436	9.82245	9.37091
9.53487	9.10997	9.73099	9.27416	7.36385	9.76265	9.44936	9.6776	10.9843	10.0403		1.07749	3.73235	6.85518	1.10314	1.16856	4.46441	5.0019	1.84607	1.0617	1.19336		10.5779	10.4316	7.82918	11.2655	9.97877	7.07673	10.7229	8.52896	10.1952	12.2368		1.11981	5.46934	1.5083	4.62348	4.36579	1.08528	1.10583	7.21372	6.50219	5.0009		10.0235	8.20044	9.71645	7.57973	9.81327	9.34437
9.49118	9.06996	9.81391	9.29079	7.32327	9.80229	9.48447	9.64204	10.7295	10.119		1.07781	3.72245	6.87208	1.10292	1.19386	4.48915	5.01202	1.84354	1.06053	1.19472		11.2042	10.5593	7.7984	11.178	10.023	6.75201	10.6757	8.36194	10.1986	12.3298		1.11701	5.52455	1.52076	4.64103	4.39409	1.08959	1.09739	7.24622	6.4354	4.99046		9.92035	8.29756	9.67303	7.61729	9.76898	9.36675
9.35384	9.20028	9.82823	9.20079	7.35429	9.60671	9.54698	9.67648	11.0019	10.0669		1.07664	3.76653	6.86775	1.10325	1.17299	4.50095	5.07118	1.85585	1.06319	1.18757		10.1516	10.5351	7.81435	11.2326	10.0783	6.90479	10.6791	8.59532	10.2231	12.358		1.12053	5.51737	1.50875	4.64152	4.39851	1.08731	1.11489	7.33002	6.51567	4.97595		9.78433	8.27712	9.66471	7.44525	9.70106	9.35402
9.21871	9.15634	9.86266	9.19484	7.13226	9.70845	9.5928	9.57914	10.8481	10.0653		1.0775	3.74612	6.87121	1.10165	1.16001	4.49418	4.99334	1.86215	1.06463	1.18742		9.46455	10.525	7.76825	11.3602	9.91685	6.69706	10.8158	8.55338	10.1984	12.4404		1.11953	5.56058	1.50846	4.65522	4.45494	1.08888	1.10976	7.31215	6.63293	4.97389		9.8861	8.28546	9.61934	7.60037	9.79156	9.334
9.75718	9.11417	9.73387	9.15856	7.41498	9.68469	9.62453	9.66207	10.7855	10.0649		1.07256	3.74206	6.88922	1.1013	1.17394	4.51389	4.96892	1.85788	1.06401	1.18725		9.15094	10.5218	7.7559	11.3871	9.9538	6.71342	10.7375	8.35858	10.2179	12.5328		1.12693	5.58447	1.51882	4.67617	4.49568	1.08524	1.09255	7.324	6.74453	4.92865		9.68375	8.18717	9.56823	7.29347	9.79139	9.35118
9.59145	9.15616	9.78123	9.16955	7.40657	9.7005	9.46623	9.65278	10.9528	10.0309		1.07294	3.72904	6.89998	1.10056	1.28779	4.52579	4.92572	1.87402	1.06208	1.18699		10.5138	10.4604	7.71687	11.2997	9.8892	6.68642	10.7188	8.49652	10.1983	12.6178		1.11777	5.63078	1.50501	4.67355	4.55298	1.09157	1.11962	7.41724	6.38455	5.01363		9.85559	8.25575	9.60092	7.60924	9.78616	9.30231
9.36278	9.15072	9.73281	9.20064	7.39778	9.89748	9.58778	9.61639	11.0364	10.0206		1.07148	3.79178	6.88489	1.10103	1.28039	4.53235	5.01738	1.83972	1.06722	1.1867		10.3404	10.5377	7.69218	11.32	9.79608	6.68097	10.8307	8.54997	10.259	12.7287		1.12179	5.62643	1.51171	4.70245	4.58227	1.08054	1.14474	7.36531	6.46063	5.0016		9.93165	7.82725	9.6171	7.47206	9.76348	9.33283
9.49611	9.1689	9.80697	9.28482	7.40058	9.90568	9.49592	9.57829	11.1299	10.0037		1.0724	3.7752	6.88298	1.1002	1.13764	4.53595	4.97808	1.86144	1.06319	1.18614		11.4399	10.4921	7.68389	11.4718	9.70789	6.67049	10.8305	8.39439	10.1802	12.7489		1.1213	5.66986	1.50628	4.71131	4.63466	1.0818	1.11005	7.35679	6.48591	4.98204		9.86546	7.75597	9.63259	7.39239	9.70867	9.30516
9.32719	9.07812	9.76738	9.27649	7.84306	9.7071	9.47944	9.64947	11.1895	10.0331		1.06662	3.77533	6.87163	1.1002	1.17491	4.54527	4.98196	1.86446	1.06146	1.18578		9.98906	10.5125	7.67822	11.3894	10.0244	6.61524	10.7907	8.61817	10.2173	12.6739		1.11978	5.65841	1.51224	4.74805	4.64679	1.08317	1.091	7.52306	6.33781	5.01561		9.93249	7.7274	9.65356	7.50182	9.68573	9.28726
9.58565	9.13948	9.86574	9.18719	7.53661	10.012	9.63216	9.65305	10.9518	10.117		1.07152	3.75712	6.88892	1.10065	1.21509	4.55227	4.99373	1.84976	1.06255	1.18935		11.04	10.5909	7.66999	11.411	10.0084	6.79477	10.822	8.71536	10.2427	12.782		1.12653	5.61129	1.51938	4.75718	4.65188	1.09101	1.11371	7.51221	6.26408	5.08496		9.96786	7.84863	9.57718	7.29085	9.75467	9.29757
9.43228	9.18952	9.71464	9.20828	7.57877	9.99631	9.69234	9.5991	10.9212	10.1262		1.07424	3.80459	6.93175	1.10235	1.13142	4.56346	4.91189	1.87426	1.06246	1.19107		9.53019	10.5625	7.63894	11.4723	9.98996	7.0009	10.8336	8.56411	10.2084	12.8801		1.11922	5.66175	1.5206	4.79641	4.64192	1.09089	1.11521	7.48159	6.03889	4.99151		9.97572	7.84215	9.4307	7.50447	9.73676	9.29219
9.58036	9.00778	9.67643	9.24628	7.84155	9.93122	9.74675	9.59266	11.0325	10.0433		1.07256	3.79415	6.90599	1.10204	1.17746	4.55724	4.94618	1.86394	1.06542	1.18824		11.353	10.6193	7.5774	11.4503	9.929	6.80009	10.7711	8.66631	10.2233	12.7779		1.12322	5.64787	1.51752	4.84049	4.63884	1.09532	1.14412	7.45226	5.85574	5.13904		10.0466	7.83653	9.48397	7.43034	9.68561	9.31034
9.60162	9.21384	9.74522	9.14138	7.59251	10.1038	9.5833	9.57852	11.0335	10.0088		1.0732	3.81624	6.88528	1.10334	1.24288	4.559	4.96215	1.85474	1.06625	1.18938		11.0213	10.7183	7.50039	11.4267	10.0882	7.00177	10.7953	8.50726	10.1601	12.6878		1.11669	5.57663	1.52199	4.84453	4.65814	1.09244	1.11125	7.45976	5.82612	5.11781		9.9881	7.77256	9.53549	7.37739	9.72267	9.30291
9.39526	9.11696	9.74619	9.24591	7.98612	10.1989	9.65822	9.57094	10.8977	10.04		1.0717	3.77085	6.90908	1.10239	1.1745	4.56685	5.00311	1.82908	1.0672	1.18749		10.355	10.4302	7.4787	11.3879	10.0488	6.81061	10.7647	8.66926	10.2042	12.7364		1.11951	5.60449	1.51286	4.84438	4.66492	1.09141	1.10099	7.42455	5.83127	5.14419		9.97567	7.79841	9.53728	7.39544	9.72219	9.29762
9.36096	9.17418	9.7581	9.22293	7.95183	9.99947	9.70408	9.68194	10.9489	10.0585		1.07155	3.76777	6.94115	1.10345	1.1383	4.56792	5.04673	1.85033	1.05799	1.18633		9.44724	10.3583	7.45854	11.3996	10.0916	7.12782	10.7303	8.61702	10.1406	12.7237		1.11939	5.58231	1.52361	4.86263	4.64107	1.09559	1.1345	7.42019	5.76093	5.19855		9.89368	7.75699	9.62602	7.36556	9.70514	9.30275
9.49383	9.27413	9.76658	9.22061	7.73046	10.0706	9.52907	9.66861	11.2397	10.0668		1.07055	3.77278	6.88258	1.10138	1.18851	4.57558	5.04048	1.8662	1.0603	1.18662		11.0094	10.3845	7.47299	11.3632	9.92532	6.82329	10.7199	8.57907	10.0981	12.5157		1.11781	5.62328	1.52367	4.888	4.63426	1.09376	1.12874	7.39591	5.50214	5.18715		9.93511	7.82433	9.60889	7.40706	9.72618	9.27111
9.50052	9.08918	9.6974	9.28021	8.34808	10.0413	9.59452	9.53435	11.0294	10.0478		1.07072	3.806	6.89182	1.10004	1.18403	4.57026	4.99028	1.83392	1.06141	1.18843		10.3672	10.4651	7.44366	11.4088	9.90496	6.85046	10.7607	8.524	10.1348	12.4823		1.11604	5.64687	1.51708	4.8346	4.62189	1.09289	1.13911	7.34286	5.60913	5.20954		9.88621	7.79266	9.55329	7.31673	9.63932	9.2784
9.29625	9.2056	9.68351	9.25478	8.10432	9.9761	9.467	9.59091	10.9627	9.99995		1.07036	3.7934	6.90224	1.09958	1.10395	4.56859	5.03894	1.85739	1.05712	1.18981		10.6971	10.4095	7.43432	11.282	10.1506	6.6271	10.7339	8.5974	10.0882	12.7427		1.11426	5.64957	1.52084	4.821	4.65881	1.08561	1.091	7.2809	5.53215	5.24019		9.95093	7.70367	9.60584	7.30534	9.69396	9.27425
9.28166	9.11182	9.74043	9.25117	7.57064	9.93754	9.46749	9.56971	10.9696	9.98337		1.0697	3.78325	6.92027	1.10059	1.18826	4.57435	5.02488	1.83685	1.05477	1.18945		9.20305	10.3648	7.38131	11.2957	9.98068	7.33043	10.6965	8.62684	10.0864	12.785		1.11467	5.5972	1.51729	4.8029	4.64984	1.08519	1.12325	7.33893	5.47393	5.18814		10.0158	7.76959	9.60841	7.24852	9.64104	9.27299
9.40902	9.09589	9.81466	9.18616	7.16286	9.94417	9.37555	9.60835	11.0613	10.0204		1.06916	3.78142	6.88	1.10124	1.25241	4.57346	5.03743	1.84701	1.05969	1.18916		11.0721	10.4736	7.38541	11.311	9.93039	7.23167	10.7431	8.80001	10.0873	12.6392		1.11774	5.625	1.52106	4.71607	4.67584	1.08842	1.11851	7.28525	5.64493	5.19759		9.75423	7.85123	9.6549	7.11533	9.74669	9.29543
9.31091	8.94455	9.78575	9.19858	7.32144	10.0781	9.38209	9.51831	11.0562	9.985		1.07015	3.76057	6.90303	1.09984	1.16421	4.57229	5.07322	1.82193	1.06052	1.19055		10.1184	10.4189	7.377	11.3722	9.97368	6.90407	10.7376	8.66797	10.1066	12.5373		1.12095	5.65036	1.52544	4.66256	4.71867	1.09485	1.12632	7.21278	5.62744	5.15647		9.97981	7.81078	9.58992	7.26126	9.6503	9.26832
9.33492	9.0755	9.71484	9.13202	7.30617	9.80417	9.19563	9.58413	11.0866	9.99859		1.07173	3.81098	6.93788	1.09896	1.16868	4.58011	5.02301	1.83677	1.0616	1.19144		10.6686	10.5855	7.35329	11.3536	10.0335	7.23232	10.7382	8.59817	10.1076	12.4865		1.1234	5.65291	1.51983	4.61024	4.76766	1.09509	1.12465	7.21213	5.71895	5.13076		9.94791	7.75669	9.62869	7.20132	9.74929	9.28566
9.37794	9.07722	9.71275	9.21224	7.32188	9.76245	9.37244	9.64556	11.1565	10.0391		1.06873	3.84106	6.91624	1.10082	1.19484	4.57393	5.03719	1.84923	1.06063	1.19204		10.4325	10.4445	7.34697	11.3359	10.0755	7.41494	10.7419	8.54795	10.1029	12.5829		1.12096	5.65461	1.51815	4.56054	4.76156	1.08991	1.11069	7.2054	5.84622	5.12116		9.81739	7.79501	9.55419	7.15284	9.70064	9.25385
9.48109	9.21882	9.77771	9.17018	7.58696	9.87503	9.14177	9.55909	10.9501	9.99773		1.06697	3.83869	6.92239	1.10101	1.16889	4.58963	5.0165	1.85242	1.06236	1.19175		10.3272	10.3472	7.42239	11.4485	10.1217	6.97765	10.7454	8.75721	10.1242	12.7612		1.12079	5.70104	1.52256	4.52039	4.73899	1.08216	1.08909	7.13434	5.9259	4.97925		10.1315	7.86017	9.58282	7.29919	9.70105	9.30839
9.20761	9.1095	9.72016	9.19028	7.60576	9.84725	9.40374	9.64593	11.1074	9.97296		1.06854	3.84152	6.95343	1.09972	1.15658	4.59906	5.03877	1.82952	1.06517	1.18327		10.6165	10.4023	7.3508	11.4017	10.106	7.29038	10.7356	8.61627	10.1168	12.8937		1.11522	5.80864	1.52019	4.50809	4.75526	1.09137	1.13086	7.11944	5.45236	5.02747		10.0282	7.87133	9.58409	7.11437	9.69693	9.3094
9.49176	9.02227	9.794	9.18237	8.18165	9.93413	9.3851	9.58664	11.0052	9.97696		1.06954	3.81749	6.94123	1.10082	1.17261	4.59391	5.08404	1.84293	1.06287	1.1825		9.51909	10.3535	7.37595	11.4889	10.0904	7.33125	10.7727	8.86585	10.1123	12.9419		1.11829	5.78878	1.52225	4.48242	4.76597	1.08878	1.10099	7.1631	5.87963	5.08746		9.89536	7.76669	9.60684	7.08276	9.65719	9.27705
9.12374	8.98724	9.74444	9.19951	7.60526	9.89088	9.37609	9.5595	11.2109	10.02		1.06874	3.77207	6.93633	1.10158	1.18634	4.59662	5.06715	1.8448	1.05779	1.18425		10.9124	10.3145	7.43673	11.4191	9.97911	7.15621	10.7798	8.72892	10.0289	13.1173		1.11623	5.83125	1.51825	4.48938	4.73485	1.09117	1.12346	7.09173	6.21416	5.03866		9.86875	7.69465	9.61362	6.9955	9.62832	9.33694
9.32192	9.06862	9.77973	9.23118	7.40297	10.1975	9.46364	9.59235	11.0648	9.94781		1.06681	3.84647	6.94776	1.09943	1.1765	4.59388	5.0655	1.86751	1.05989	1.18538		11.0925	10.4122	7.44939	11.4015	10.0603	7.36163	10.7649	8.75508	10.0277	13.2205		1.1119	5.76121	1.52173	4.48606	4.7478	1.0909	1.11239	6.80537	6.22362	5.01151		9.80371	7.70935	9.57947	7.27526	9.75732	9.30486
9.36916	9.11688	9.73639	9.28156	7.83779	10.0695	9.28033	9.55845	11.0044	9.97821		1.07095	3.86106	6.91461	1.09909	1.17002	4.60332	5.07332	1.82721	1.0629	1.18675		11.5258	10.5306	7.48087	11.4711	10.1392	7.03734	10.7558	8.67239	10.0788	13.2449		1.11486	5.7836	1.51994	4.46906	4.75004	1.0894	1.12261	6.76413	6.33028	4.95534		9.92938	7.77797	9.60187	7.15622	9.71142	9.31733
9.34195	9.02041	9.72154	9.27057	7.92273	9.79239	9.2271	9.67759	11.0418	10.0029		1.06825	3.87062	6.91852	1.09995	1.18533	4.59843	5.15756	1.85654	1.0634	1.18761		9.61631	10.3127	7.46623	11.5864	10.114	6.99221	10.8376	8.77541	10.1386	13.1402		1.12375	5.7799	1.51597	4.46897	4.7566	1.09	1.13081	6.92321	6.39706	4.98658		10.0229	7.85753	9.61429	6.99866	9.72826	9.33719
9.46443	9.05626	9.7129	9.20947	7.34396	10.0952	9.33034	9.61351	11.0954	10.0081		1.06723	3.83516	6.93762	1.0997	1.15957	4.60338	5.13117	1.85181	1.06532	1.18592		10.3447	10.4094	7.55121	11.5999	10.1943	6.93267	10.7678	8.58935	10.1252	13.3821		1.11637	5.74165	1.51409	4.46037	4.77515	1.08435	1.12184	6.99007	6.37155	5.00613		9.88532	7.73306	9.59443	7.02336	9.68453	9.34045
9.40659	9.05314	9.75887	9.26989	7.64839	9.99003	9.39198	9.61442	10.9446	9.99974		1.06676	3.83772	6.96194	1.09958	1.17024	4.59082	5.10421	1.86397	1.06425	1.18413		9.24492	10.3954	7.56046	11.6453	10.2062	6.82469	10.826	8.84608	10.134	13.3827		1.11477	5.79152	1.52169	4.45484	4.77749	1.08678	1.15345	7.0922	6.45985	5.03012		9.96091	7.79386	9.59246	7.16996	9.61459	9.33116
9.3582	9.0393	9.76874	9.22075	7.85186	10.0658	9.2211	9.54782	10.9101	10.007		1.06545	3.86461	6.8638	1.09967	1.17831	4.59947	5.16418	1.88224	1.06088	1.18335		11.6286	10.3222	7.55516	11.7021	10.0441	7.22908	10.7973	8.69588	10.1371	12.9761		1.11684	5.78789	1.52239	4.47901	4.78529	1.08222	1.09506	7.1834	6.31368	4.97288		10.0489	7.73595	9.57976	7.05003	9.70341	9.3882
9.50361	9.05368	9.77806	9.21981	7.77916	10.0757	9.42089	9.60758	11.1834	9.99348		1.06618	3.80761	6.8954	1.10063	1.18965	4.59867	5.1239	1.84518	1.06199	1.18608		10.8181	10.5006	7.60133	11.8097	10.199	6.93102	10.8654	8.78087	10.0967	13.0627		1.1236	5.77117	1.51807	4.46245	4.81195	1.08036	1.11524	7.11524	6.30349	5.03585		9.93018	7.76146	9.60719	6.94935	9.59682	9.34297
9.37957	8.93615	9.80462	9.23682	7.72251	9.84563	9.12616	9.54807	10.9742	9.9378		1.0649	3.79968	6.94838	1.09946	1.16741	4.59093	5.13017	1.82759	1.06332	1.18401		10.6148	10.3819	7.66947	11.9354	10.1983	7.00003	10.7873	8.78588	10.0761	13.086		1.11212	5.792	1.51818	4.47012	4.82503	1.08049	1.1105	7.08716	6.44777	4.90501		9.9277	7.67212	9.56077	6.92436	9.64518	9.35592
9.25085	9.06664	9.66138	9.23733	7.75697	9.94388	9.14983	9.59704	10.997	9.96884		1.06135	3.84905	6.87113	1.10047	1.1684	4.59676	5.08712	1.83144	1.0601	1.18117		10.3227	10.421	7.64849	12.0233	10.1575	7.28193	10.8784	8.67679	10.1008	13.0401		1.12301	5.82663	1.5224	4.45532	4.84577	1.08975	1.13058	7.21987	6.38922	4.94075		10.0337	7.72174	9.57643	6.96937	9.6302	9.33145
9.47516	9.05675	9.74854	9.23199	7.66255	10.1401	9.24962	9.53555	10.8266	9.98815		1.06195	3.87584	6.87005	1.10005	1.16236	4.59966	5.14334	1.85283	1.06193	1.18068		10.0008	10.3964	7.67915	12.0451	10.093	7.33064	10.8393	8.63517	10.0696	13.1167		1.11794	5.75749	1.51897	4.47283	4.89559	1.09411	1.11717	7.19167	6.38187	4.90905		10.12	7.79379	9.61456	6.97143	9.56164	9.37149
9.43576	9.02094	9.79214	9.23707	7.47602	9.8003	9.1364	9.63666	11.0335	9.9877		1.06362	3.9066	6.95644	1.09953	1.18264	4.61118	5.12293	1.86032	1.06269	1.18179		10.3641	10.253	7.76854	12.1024	9.98934	6.85704	10.8359	8.81427	10.0771	13.0324		1.11389	5.73496	1.51574	4.50689	4.99231	1.09451	1.09011	7.16331	6.43418	4.90775		10.0648	7.77953	9.59289	6.99093	9.64181	9.30893
9.47073	9.07715	9.75225	9.16897	7.42838	10.0785	9.261	9.57726	11.1561	9.95387		1.06448	3.88037	6.89382	1.0996	1.18677	4.61187	5.114	1.82864	1.06524	1.18178		10.6579	10.5225	7.8194	12.2929	10.1534	7.11068	10.7668	8.94191	10.0754	12.8135		1.10798	5.76794	1.52479	4.49597	5.07974	1.09122	1.12803	7.20438	6.45547	4.95785		10.1259	7.73182	9.61175	7.00324	9.67074	9.30452
9.44012	9.04075	9.68119	9.21838	7.75819	9.8727	9.31883	9.62166	11.1567	10.0168		1.06392	3.87609	6.86903	1.10103	1.15969	4.62015	5.15571	1.83356	1.06533	1.17884		10.3605	10.4153	7.83498	12.3925	10.0889	7.42749	10.8319	8.86442	10.061	12.7089		1.10656	5.78065	1.52386	4.50569	5.13973	1.09198	1.11424	7.22136	6.42037	4.9411		10.0081	7.80619	9.64751	6.9804	9.61436	9.29739
9.25752	8.92921	9.63835	9.20285	7.7343	9.92551	9.18065	9.58427	11.1766	9.96182		1.06191	3.87591	6.9438	1.10274	1.18408	4.61159	5.15105	1.831	1.06139	1.17973		11.4133	10.595	7.88658	12.4112	10.0564	7.14453	10.7256	8.76714	10.0919	12.7516		1.11361	5.70753	1.51301	4.50665	5.21754	1.09668	1.12308	7.16284	6.36301	4.96619		9.87396	7.77425	9.58778	6.89787	9.48338	9.35386
9.50718	9.08211	9.74503	9.2451	7.93981	9.96562	9.10353	9.55964	10.9979	9.95373		1.06147	3.88707	6.93478	1.10362	1.17205	4.61535	5.11238	1.82763	1.05951	1.17821		11.0069	10.4011	7.94778	12.4409	10.0346	7.1378	10.7206	8.74928	10.0994	13.0351		1.11287	5.70375	1.53547	4.50682	5.24137	1.09278	1.11881	7.19967	6.28026	4.95599		9.96693	7.7314	9.57415	6.83338	9.65865	9.28938
9.41399	9.10356	9.699	9.22868	7.99443	9.87304	9.24987	9.65133	10.9829	9.92546		1.0651	3.8699	6.85682	1.10281	1.16591	4.61602	5.12258	1.86947	1.06095	1.17928		10.9639	10.4032	8.0255	12.4874	10.2063	7.14781	10.6973	8.88983	10.0501	13.2111		1.11559	5.72267	1.50849	4.51463	5.22805	1.09035	1.11548	7.13748	6.2034	4.92076		9.69555	7.72216	9.61014	6.90844	9.58496	9.30376
9.27109	8.97513	9.75512	9.18488	7.75225	9.88562	9.25996	9.58896	10.7471	9.95034		1.06223	3.90601	6.91667	1.10342	1.15702	4.6278	5.12439	1.84289	1.05987	1.17768		10.9853	10.3296	8.15735	12.4042	10.158	7.14146	10.7159	8.7424	10.0392	13.2046		1.11337	5.70431	1.52184	4.56774	5.24506	1.08308	1.10414	7.13068	6.29854	4.95223		9.74861	7.67325	9.58498	6.94681	9.56997	9.27742
9.52414	9.05037	9.74189	9.24151	7.33684	9.81145	9.43588	9.62102	10.7239	9.97359		1.0595	3.87203	6.91664	1.10355	1.18957	4.62918	5.13734	1.86212	1.05948	1.17769		11.6048	10.5015	8.08643	12.4361	9.7802	7.24364	10.7024	8.7178	10.0572	13.2285		1.11783	5.70385	1.5247	4.55999	5.25884	1.09007	1.1091	7.23982	6.26312	4.8441		9.90871	7.70448	9.57474	6.99072	9.60789	9.26295
9.37	9.08795	9.6936	9.13576	7.68551	10.2034	9.29761	9.54051	10.808	10.0003		1.06108	3.87362	6.86955	1.10611	1.16439	4.62034	5.15144	1.85069	1.06217	1.17301		10.9608	10.4755	8.13382	12.3101	10.0152	6.99802	10.7148	8.79423	10.0927	13.1897		1.1162	5.71976	1.52118	4.53143	5.2953	1.10055	1.10704	7.23053	6.10531	4.84453		9.88091	7.78452	9.54359	6.65317	9.59859	9.23764
9.2591	9.04601	9.73482	9.22324	7.61203	10.2171	9.13544	9.61572	11.0204	9.97324		1.06166	3.90137	6.88384	1.10613	1.16333	4.63225	5.24137	1.84762	1.05936	1.17539		10.1475	10.2971	8.18984	12.2283	10.0683	6.45166	10.7256	9.00452	10.07	13.3635		1.12083	5.71377	1.52202	4.52686	5.2949	1.09421	1.12899	7.24242	6.24256	4.86114		9.90328	7.7793	9.57741	6.81226	9.56244	9.24406
9.67636	8.96247	9.70096	9.15918	7.44306	10.0085	9.1841	9.57932	10.9502	9.98519		1.06344	3.89295	6.90136	1.10585	1.18017	4.62295	5.25424	1.84459	1.05964	1.17327		10.6814	10.2931	8.2037	12.1199	10.0094	6.75629	10.6605	8.83634	10.1009	13.3497		1.11794	5.68849	1.51874	4.56353	5.31233	1.09858	1.10011	7.26272	6.14091	4.8231		9.85934	7.71329	9.57149	6.90216	9.61844	9.2241
9.46506	8.928	9.73509	9.1134	7.60882	10.0043	9.30291	9.60218	10.9891	9.97073		1.05908	3.9061	6.88493	1.10546	1.16295	4.62385	5.23737	1.83685	1.06118	1.17506		10.4037	10.3074	8.19986	11.9696	10.1664	6.61452	10.693	8.77896	10.0687	13.4332		1.10999	5.72423	1.52374	4.54007	5.33728	1.09494	1.15368	7.29434	5.93889	4.77877		9.93722	8.2938	9.5344	6.75539	9.65607	9.24047
9.34423	8.89545	9.67225	9.20644	7.69541	9.81999	9.13381	9.49428	10.9784	9.93094		1.0601	3.87708	6.87817	1.10532	1.1725	4.64611	5.19427	1.86225	1.05922	1.17183		9.65941	10.35	8.22096	11.8222	10.0393	6.51521	10.6916	8.86063	9.98059	13.4392		1.11633	5.70512	1.51616	4.51974	5.37554	1.08901	1.12799	7.25489	6.03145	4.85132		9.80064	8.28611	9.48821	6.86948	9.63918	9.26333
9.42117	8.96684	9.73645	9.15648	7.73636	10.0265	9.14258	9.56172	10.8221	9.93905		1.06096	3.90114	6.93248	1.1038	1.1578	4.64913	5.22241	1.82418	1.06278	1.17449		10.0669	10.2688	8.17788	11.7576	10.0223	6.76233	10.7072	8.77455	10.0047	13.1554		1.10855	5.73479	1.52005	4.50778	5.44275	1.09742	1.10214	7.25603	6.12309	4.82884		9.85675	8.19646	9.55318	6.74911	9.54775	9.24954
9.35671	8.96311	9.69983	9.14759	7.64392	10.0179	9.09159	9.55593	11.2055	9.96734		1.05794	3.91759	6.88715	1.10281	1.17541	4.6614	5.26853	1.83678	1.06251	1.17633		9.72521	10.3157	8.17062	11.6375	10.0924	6.5171	10.6962	8.70285	10.0269	13.109		1.10852	5.76266	1.52546	4.49645	5.49575	1.09645	1.09889	7.2634	6.15469	4.81899		9.85927	8.20458	9.63402	6.80376	9.63846	9.2174
9.31918	9.01985	9.71554	9.15135	7.87599	10.0995	9.15401	9.53343	10.9948	9.94058		1.06103	3.92973	6.89921	1.10098	1.15592	4.6698	5.29161	1.85457	1.06115	1.17439		11.2372	10.4419	8.13589	11.5096	10.0825	6.51409	10.6902	8.91708	10.004	13.1189		1.1113	5.76806	1.52499	4.50774	5.50572	1.09217	1.11239	7.19941	6.03871	4.76696		9.88869	8.25283	9.6735	6.78127	9.5645	9.22631
9.20768	8.98827	9.67381	9.25785	7.83994	10.0052	9.03672	9.51516	11.1515	9.90367		1.06111	3.9181	6.9178	1.10312	1.15312	4.67965	5.24498	1.83982	1.05866	1.17564		10.7038	10.3942	8.09745	11.3259	9.93552	7.09615	10.708	8.83345	10.0196	13.1404		1.11433	5.7992	1.52218	4.54213	5.52961	1.09392	1.12775	7.231	6.03562	4.69297		9.83757	8.21215	9.7039	6.70786	9.52412	9.22217
9.16832	9.07247	9.78026	9.23827	7.87783	10.2452	9.23936	9.47335	11.0842	9.95674		1.05949	3.93227	6.91353	1.10197	1.18297	4.68786	5.24274	1.8471	1.05725	1.17963		10.7225	10.3712	8.05829	11.3275	9.99855	7.06326	10.7059	8.79227	10.0051	13.0639		1.10703	5.81921	1.52063	4.51517	5.53967	1.09179	1.09397	7.27926	6.18642	4.74287		9.88265	8.31216	9.64124	6.86372	9.56311	9.22336
9.43929	9.01627	9.6749	9.17317	7.53049	10.1026	9.18713	9.49491	10.935	9.92897		1.05945	3.92884	6.90226	1.10295	1.18677	4.68899	5.25578	1.87187	1.06092	1.17661		10.8914	10.1571	8.01823	11.1891	10.0237	6.99324	10.6994	9.05191	10.0435	13.1054		1.11537	5.85829	1.51754	4.50966	5.51764	1.08813	1.05943	7.28586	6.0427	4.82858		9.91963	8.25181	9.64926	6.84844	9.5952	9.25944
9.36044	8.9831	9.75539	9.25761	7.61624	10.1497	9.30381	9.60945	10.8283	9.95719		1.06175	3.92532	6.96874	1.1034	1.15484	4.68797	5.2702	1.83707	1.06169	1.17854		11.6719	10.1998	8.00741	11.0441	10.0067	7.01379	10.6867	8.8605	10.0011	13.1869		1.10811	5.8318	1.51646	4.54313	5.51802	1.09068	1.09263	7.26225	6.13278	4.83417		9.96855	8.17126	9.62129	6.8191	9.61536	9.22281
9.28439	8.97055	9.65222	9.22839	7.94776	10.1702	9.34872	9.61239	11.0416	9.96242		1.06109	3.92197	6.99538	1.10407	1.16551	4.67284	5.30083	1.85675	1.06455	1.17435		10.6308	10.2095	7.95249	10.9746	10.0217	7.18196	10.6875	8.81227	10.0122	13.4159		1.11796	5.92335	1.52727	4.53944	5.48345	1.08792	1.1266	7.30175	6.08318	4.83704		10.0448	8.18995	9.59523	6.76898	9.6091	9.20747
9.48632	8.96451	9.73076	9.21436	7.79839	9.8597	9.14507	9.5863	11.1018	9.97673		1.05811	3.96907	6.99035	1.10373	1.1817	4.66965	5.26068	1.84967	1.06387	1.17645		9.62762	10.2223	7.94291	10.9157	10.0674	7.33416	10.7505	8.87985	9.9367	13.5027		1.10772	5.92142	1.52538	4.55577	5.47888	1.09931	1.12658	7.33016	6.11089	4.81747		9.93326	8.2104	9.49518	6.75024	9.61874	9.24398
9.18731	8.97866	9.66628	9.26816	8.08892	9.82714	9.39396	9.59607	10.8691	9.92057		1.05717	3.97086	7.05295	1.10748	1.17929	4.66837	5.32128	1.84735	1.0653	1.17464		9.97669	10.1927	7.87876	10.9177	9.96213	7.22521	10.7187	8.86578	9.97831	13.3207		1.10744	5.94153	1.52139	4.58162	5.47461	1.09422	1.13571	7.3494	6.25447	4.83199		10.0186	8.27829	9.53821	6.67189	9.5679	9.21298
9.35323	8.90301	9.69514	9.20972	7.91014	10.1522	9.36593	9.47435	10.9192	9.92841		1.05787	3.96637	7.08916	1.10873	1.17207	4.67609	5.29699	1.83771	1.057	1.17353		10.2327	10.2731	7.82638	10.8284	10.1962	7.02451	10.7278	8.85431	9.99662	13.1946		1.10739	6.01375	1.52333	4.59394	5.4651	1.08982	1.12497	7.26215	6.21867	4.74907		10.0339	8.23463	9.56998	6.54598	9.63119	9.2085
9.37515	8.97019	9.70796	9.25665	8.03187	10.1222	9.29645	9.56145	11.094	9.89674		1.05858	3.9564	7.02767	1.11014	1.16164	4.67115	5.29847	1.85762	1.05747	1.17024		9.94782	10.2911	7.80399	10.8506	10.094	6.96322	10.7725	8.98832	9.96752	13.1393		1.10705	5.98336	1.53261	4.60544	5.4639	1.09343	1.1166	7.23675	6.35883	4.76012		9.89939	8.29661	9.48232	6.67383	9.5854	9.23954
9.18341	9.00132	9.634	9.19609	8.15489	10.1061	9.3618	9.53354	11.0615	9.86912		1.05153	3.94842	7.04444	1.10878	1.191	4.67949	5.29234	1.84306	1.05841	1.17046		11.1206	10.3423	7.73211	10.8552	10.1759	7.15834	10.73	8.95573	9.97907	13.1436		1.11021	5.95221	1.52375	4.65118	5.4458	1.0888	1.12902	7.2711	6.39831	4.7853		9.8964	8.27963	9.50606	6.54014	9.5888	9.20731
9.16164	8.91351	9.67343	9.22156	7.7574	10.4475	9.36425	9.52725	10.9686	9.88054		1.05773	3.9884	7.04795	1.10783	1.16023	4.6844	5.20787	1.84967	1.05827	1.1725		10.4371	10.2866	7.68508	10.9036	10.2072	6.98073	10.7638	8.78218	9.94585	13.1725		1.11452	5.93707	1.52496	4.68548	5.45467	1.09384	1.12749	7.27828	6.50241	4.84313		9.90315	8.2708	9.47746	6.42854	9.50122	9.22612
9.17596	8.90725	9.64534	9.22464	7.7812	10.0568	9.23941	9.48937	11.006	9.92211		1.05452	3.9671	7.05369	1.10576	1.16306	4.67583	5.18342	1.85935	1.06452	1.1696		10.234	10.2903	7.63521	10.9411	10.0993	6.79144	10.7685	9.02518	9.98462	13.2681		1.11075	5.90332	1.527	4.67868	5.43284	1.09977	1.12814	7.2466	6.5733	4.76147		9.76435	8.23011	9.48533	6.44879	9.5717	9.26854
9.3199	9.03461	9.72742	9.1559	7.69625	10.0933	9.46599	9.47082	10.9418	9.91428		1.05666	3.95726	7.01834	1.10579	1.17478	4.65533	5.24511	1.85154	1.06186	1.16967		11.4199	10.4334	7.62266	10.9842	10.1241	6.88931	10.7678	8.99732	9.92694	13.5191		1.11241	5.88526	1.51204	4.66096	5.44456	1.09038	1.10918	7.25038	6.63428	4.75424		9.8192	8.30135	9.45073	6.58863	9.59534	9.31011
9.28041	8.98364	9.68499	9.20022	7.9712	10.264	9.50314	9.50187	11.0836	9.89909		1.05307	3.96458	7.04321	1.10604	1.16063	4.66202	5.25638	1.85139	1.05922	1.17148		11.2203	10.2219	7.56087	11.0139	10.0552	6.81709	10.7293	9.06075	9.97054	13.564		1.11343	5.86414	1.525	4.64755	5.41443	1.09244	1.09452	7.15783	6.56607	4.78341		9.79006	8.27495	9.49284	6.55538	9.50033	9.32957
9.3002	8.9545	9.62885	9.20761	7.75472	10.4672	9.29643	9.58205	11.0242	9.9554		1.05634	3.96875	7.03728	1.10386	1.1643	4.66795	5.23402	1.84177	1.05767	1.17161		9.57918	10.2881	7.59082	10.9671	10.1366	7.00102	10.7635	8.93433	9.96722	13.5768		1.1131	5.84022	1.52154	4.67817	5.43375	1.09356	1.08874	7.19658	6.73852	4.82096		9.76488	8.11252	9.51086	6.52472	9.45584	9.3398
9.29242	8.98972	9.73799	9.18805	8.22423	10.2095	9.47769	9.5182	11.1163	9.94976		1.05365	3.97077	6.99818	1.10128	1.18474	4.66719	5.21392	1.83715	1.05863	1.17195		9.49189	10.3532	7.55164	11.078	9.89156	6.67752	10.7541	8.92788	9.95003	13.5205		1.1109	5.88441	1.52066	4.66965	5.43938	1.09563	1.14043	7.21173	6.56401	4.89783		9.67618	8.23717	9.51136	6.67052	9.53456	9.39228
9.18123	8.83029	9.70019	9.22362	7.90722	10.0257	9.45575	9.51722	11.174	9.96729		1.05678	3.94673	7.01284	1.10116	1.15754	4.67879	5.25014	1.85369	1.05564	1.16961		9.79202	10.31	7.45632	11.0397	10.0702	6.70763	10.7261	8.95006	9.90881	13.445		1.11588	5.83286	1.52216	4.64969	5.47125	1.09079	1.14636	7.2027	6.58199	4.97321		9.76389	8.20576	9.46701	6.48806	9.53201	9.39007
9.35659	9.05201	9.67192	9.14408	7.81846	10.0679	9.46066	9.52082	11.1883	9.96396		1.05576	4.00835	7.02198	1.09908	1.17074	4.68704	5.27303	1.84798	1.05922	1.16502		9.28033	10.5438	7.44928	10.9883	10.1598	6.93959	10.771	8.86961	9.92984	13.2634		1.11179	5.90677	1.52407	4.62619	5.4919	1.09571	1.12407	7.16433	6.49904	5.04835		9.79256	8.26126	9.46213	6.59204	9.51327	9.36039
9.35754	8.89074	9.58201	9.19201	7.82804	10.0694	9.35187	9.50277	10.9609	9.95032		1.05833	4.00899	6.98941	1.09687	1.15538	4.69483	5.28071	1.85988	1.05822	1.16335		10.0695	10.4493	7.48835	11.0554	9.99504	7.33499	10.7558	9.09134	9.98772	13.1637		1.11197	5.94262	1.51557	4.60992	5.52046	1.0937	1.12697	7.20747	6.52615	5.06721		9.69683	8.24577	9.50742	6.39377	9.53172	9.39918
9.24948	8.93754	9.6495	9.15477	7.91297	10.1962	9.76218	9.62534	11.0653	9.94327		1.05683	3.98783	6.98978	1.09805	1.14852	4.69148	5.24166	1.8668	1.0595	1.16403		10.5258	10.538	7.40478	11.2097	9.97556	7.09771	10.7632	8.89147	9.94297	12.9729		1.11486	5.9163	1.52271	4.55469	5.55519	1.10429	1.1199	7.16408	6.29354	5.02342		9.59888	8.21822	9.49986	6.43558	9.46537	9.36003
9.18391	8.88271	9.66955	9.16255	8.07436	10.133	9.69757	9.48096	10.9605	9.93289		1.05487	4.0242	6.97004	1.0977	1.1685	4.69313	5.23098	1.86156	1.05523	1.16779		9.62253	10.4199	7.42156	11.2595	10.1419	7.27254	10.7446	8.98482	9.92199	13.0491		1.10605	5.98696	1.52018	4.54322	5.58628	1.0938	1.09312	7.18341	6.25624	5.12714		9.56936	8.18889	9.5484	6.52061	9.51525	9.38109
9.20133	8.84883	9.6097	9.24923	8.07796	10.0167	9.68931	9.42755	10.9695	9.88847		1.05468	3.97169	6.9701	1.09652	1.15867	4.69716	5.29565	1.8347	1.05921	1.16655		11.3	10.3015	7.45741	11.2689	10.3541	7.22488	10.7964	8.92661	9.91166	13.1385		1.11127	5.95026	1.52089	4.50739	5.62441	1.0987	1.12081	7.15229	6.17765	5.02079		9.74104	8.23086	9.43689	6.5565	9.49227	9.39856
9.62517	8.8391	9.75611	9.22654	8.16069	9.78381	9.61255	9.4851	10.8156	9.90691		1.0544	3.95365	6.95508	1.09483	1.15237	4.69166	5.30581	1.86317	1.05907	1.16439		10.4187	10.239	7.44788	11.3287	10.1512	7.27809	10.7608	8.84263	9.93054	13.2219		1.1131	6.0568	1.52342	4.48788	5.64787	1.09751	1.08786	7.16949	6.19011	5.10072		9.63312	8.22499	9.44829	6.45122	9.3773	9.35633
9.41553	9.01504	9.6857	9.18622	7.83342	10.1111	9.55983	9.52706	11.1743	9.89505		1.05386	3.99063	6.95216	1.09493	1.15738	4.70552	5.29029	1.85114	1.05869	1.16549		10.3398	10.3345	7.42029	11.4524	9.97076	7.00455	10.763	8.94164	9.90403	13.2449		1.11211	6.02869	1.5266	4.46842	5.67556	1.09804	1.1458	7.14082	6.04294	5.09444		9.49871	8.31786	9.52262	6.67505	9.48	9.30527
9.25606	8.84178	9.56174	9.16561	7.86219	9.96048	9.65303	9.51321	11.0367	9.85666		1.0543	4.02416	6.9725	1.09344	1.17915	4.70016	5.30161	1.86176	1.05917	1.16152		10.8849	10.4543	7.50118	11.4429	10.0815	7.30169	10.7674	8.96987	9.88625	13.1978		1.11281	5.96701	1.52015	4.46689	5.75037	1.09314	1.12984	7.17459	6.13692	4.97904		9.47355	8.12919	9.52094	6.56453	9.44955	9.33016
9.44522	8.90835	9.51992	9.15319	8.02672	10.1701	9.58642	9.46053	10.9452	9.86427		1.05133	4.02661	6.94428	1.09557	1.15477	4.7099	5.3639	1.86701	1.05544	1.15871		10.7754	10.4448	7.53929	11.4877	10.2331	7.18994	10.7512	9.07099	9.91025	13.3227		1.10999	5.97945	1.52497	4.46817	5.84556	1.09834	1.12534	7.24191	5.98443	4.95495		9.46669	8.20255	9.57484	6.41463	9.52953	9.31652
9.35313	8.95477	9.63745	9.16123	8.03702	10.0465	9.60248	9.53236	11.166	9.88252		1.05239	4.04798	6.95074	1.09577	1.17259	4.72279	5.32859	1.82435	1.06215	1.15378		11.5672	10.2628	7.59237	11.5824	10.108	7.0989	10.7664	8.86127	9.85583	13.1661		1.11571	5.92084	1.52504	4.45999	5.93921	1.09027	1.1246	7.21804	5.88829	4.94749		9.61715	8.18944	9.55337	6.37794	9.49601	9.30964
9.33246	8.98272	9.61603	9.12246	8.00255	10.258	9.66974	9.53639	10.9046	9.88141		1.05475	4.02599	6.95763	1.09606	1.17852	4.7159	5.34607	1.86569	1.06266	1.15245		10.0941	10.29	7.67285	11.5484	10.0474	7.16924	10.7767	9.02395	9.87706	13.24		1.10847	5.90989	1.5207	4.48251	6.01722	1.09045	1.09343	7.30084	6.06423	4.8909		9.49561	8.23091	9.59145	6.49357	9.52924	9.30185
9.44423	8.89994	9.68338	9.1404	8.36214	10.268	9.72244	9.53138	11.0871	9.95903		1.054	3.98503	6.9361	1.0968	1.1706	4.70064	5.35252	1.85166	1.06315	1.15466		10.449	10.3962	7.73349	11.5301	10.126	7.14583	10.7789	9.02006	9.86277	13.4476		1.11208	5.95863	1.52939	4.4392	6.04377	1.08843	1.11416	7.33153	5.94742	4.85569		9.50154	8.20408	9.55536	6.51908	9.5562	9.27517
9.29306	8.86787	9.62	9.07656	8.11495	10.0463	9.47266	9.48361	11.1138	9.88314		1.05521	4.00909	6.94166	1.09585	1.1798	4.67164	5.29299	1.84605	1.06485	1.15401		10.0565	10.3217	7.84618	11.6895	9.99349	6.9143	10.7855	8.94354	9.81623	13.5201		1.11049	5.91125	1.5252	4.47777	6.05934	1.09789	1.13564	7.32275	5.95071	4.84626		9.52441	8.1957	9.55298	6.47822	9.46029	9.2209
9.47609	8.94096	9.64973	9.1545	7.83893	10.1478	9.66304	9.54053	11.2359	9.89448		1.05261	4.00283	6.95482	1.09678	1.1895	4.68274	5.37759	1.84305	1.06306	1.1548		11.0486	10.2173	7.92583	11.763	10.0737	6.8945	10.7904	9.07402	9.80922	13.4978		1.10861	5.9613	1.52247	4.46744	6.07045	1.09629	1.11759	7.2776	6.02306	4.92454		9.53511	8.17033	9.55704	6.42213	9.5005	9.21119
9.25391	8.95209	9.57377	9.15295	8.01124	10.1989	9.54517	9.51887	11.3644	9.92091		1.05241	4.05244	6.92668	1.09526	1.17651	4.69433	5.33627	1.84212	1.05699	1.15855		11.2944	10.2706	7.96311	11.8355	9.91562	6.66122	10.8014	8.95092	9.85334	13.4693		1.11456	5.96179	1.52125	4.47429	6.04172	1.1004	1.13801	7.29088	6.09253	4.96679		9.60027	8.28622	9.53105	6.42911	9.48899	9.22623
9.32536	9.01348	9.65537	9.19172	8.1364	10.0073	9.71713	9.43007	11.0492	9.92383		1.05383	4.01396	6.933	1.09682	1.16232	4.71563	5.3677	1.87233	1.05973	1.15557		11.2993	10.341	8.0217	11.9723	9.96117	7.01663	10.793	8.9116	9.82627	13.4482		1.11004	5.96457	1.51954	4.47784	5.99127	1.10059	1.10632	7.2619	6.00803	4.87496		9.73365	8.24502	9.50973	6.45639	9.57923	9.19057
9.41777	8.94636	9.52668	9.17022	7.80427	10.1987	9.6726	9.49928	10.9323	9.9215		1.05396	4.03639	6.91847	1.09542	1.17453	4.7228	5.2889	1.86051	1.05998	1.15438		10.4872	10.3249	8.13388	12.2437	10.146	6.75622	10.7941	8.96339	9.85348	13.3281		1.09948	6.00284	1.52696	4.51222	5.96832	1.09522	1.11294	7.25679	6.12728	4.85864		9.53563	8.29309	9.52136	6.41899	9.51564	9.20729
9.24574	8.89763	9.62307	9.21532	8.15152	10.206	9.52941	9.47596	11.0027	9.8835		1.0515	4.04003	6.9182	1.09568	1.15961	4.74075	5.30688	1.84024	1.06398	1.15383		10.8578	10.2099	8.17836	12.1832	10.0073	7.04268	10.8062	8.86435	9.8812	13.3097		1.11499	5.99981	1.52826	4.49247	5.92108	1.10911	1.11291	7.18837	6.19362	4.93114		9.59046	8.2402	9.54072	6.45172	9.48062	9.20851
9.32912	8.98393	9.55913	9.18348	8.10956	9.9791	9.38791	9.44106	11.0661	9.83999		1.04964	4.09848	6.92297	1.09589	1.17854	4.7501	5.34109	1.84214	1.06579	1.15677		9.59487	10.2459	8.19346	12.3555	9.8377	7.25244	10.8002	8.99314	9.846	13.0742		1.10616	6.01563	1.53016	4.54439	5.90016	1.09423	1.10509	7.17922	6.05478	4.93947		9.72403	8.20679	9.53825	6.29766	9.51037	9.19153
9.35651	8.85482	9.66686	9.15607	8.2421	10.3194	9.3704	9.4545	10.9193	9.86562		1.05059	4.05188	6.91714	1.09485	1.16866	4.76227	5.36356	1.86422	1.06293	1.15446		10.6873	10.4042	8.2522	12.5496	9.86806	7.09225	10.7799	8.92032	9.82232	13.0455		1.11042	6.01788	1.53566	4.53218	5.88338	1.09275	1.10767	7.19576	5.55566	4.87807		9.45467	8.21867	9.54807	6.32232	9.50323	9.21151
9.30642	8.93359	9.70376	9.17366	8.15639	10.3338	9.52386	9.50416	11.021	9.90989		1.05106	4.07185	6.92888	1.09508	1.16257	4.75997	5.41884	1.84908	1.05808	1.15374		10.3116	10.2519	8.2798	12.445	9.89738	7.28385	10.8032	8.93517	9.90814	13.0627		1.10745	5.9768	1.52385	4.54422	5.86551	1.08235	1.1075	7.15411	6.3524	4.90804		9.51119	8.26872	9.58608	6.39179	9.40477	9.17908
9.28975	9.05578	9.55583	9.16735	7.90684	10.1001	9.4552	9.55231	11.0077	9.90123		1.04832	4.06358	6.95394	1.09525	1.15931	4.76433	5.41487	1.85665	1.06184	1.15519		9.39076	10.3769	8.31717	12.4761	9.80943	7.42648	10.7843	8.9467	9.8773	13.1835		1.10943	5.95144	1.53444	4.5961	5.82403	1.08407	1.08573	7.18402	6.60914	4.86035		9.53089	8.20217	9.56614	6.42955	9.39731	9.19468
9.40173	8.86214	9.54405	9.22026	8.19239	10.2277	9.37587	9.47707	11.0567	9.89207		1.04859	4.0816	6.91253	1.09537	1.16803	4.78166	5.41288	1.85698	1.05788	1.15609		10.5966	10.2549	8.31372	12.6179	9.7473	7.232	10.8301	8.85254	9.867	13.1639		1.1031	5.9728	1.54706	4.60212	5.77506	1.09769	1.11481	7.13642	6.49754	4.87509		9.59722	8.21401	9.51489	6.40341	9.50129	9.20505
9.2831	8.74547	9.7184	9.17151	8.18474	10.2242	9.20911	9.48745	10.9162	9.80808		1.0514	4.11029	6.90657	1.09602	1.16456	4.78893	5.39434	1.82955	1.06495	1.15407		9.91808	10.2971	8.3234	12.5058	10.0338	7.05488	10.8086	8.99651	9.86923	13.1975		1.10713	6.01188	1.54889	4.64324	5.75771	1.09195	1.09473	7.08362	6.61082	4.83096		9.59051	8.2763	9.55788	6.30095	9.43072	9.20963
9.32309	8.87404	9.64583	9.10111	7.96166	10.1508	9.08634	9.47022	11.2314	9.91506		1.04882	4.0915	6.92847	1.09405	1.14723	4.77461	5.50511	1.81195	1.06267	1.15471		11.7673	10.3417	8.30844	12.4399	10.0782	7.29909	10.8417	8.89517	9.88827	13.0332		1.10793	5.99449	1.53515	4.67984	5.72826	1.10206	1.12939	7.06614	6.67711	4.79378		9.74641	8.33011	9.53976	6.46244	9.39828	9.25283
9.42512	9.00188	9.648	9.17281	7.9252	10.2409	9.07651	9.48184	11.0059	9.83498		1.04914	4.08562	6.93154	1.09475	1.16085	4.77625	5.45517	1.8509	1.06335	1.15641		10.7147	10.2141	8.29604	12.5121	10.1408	7.12075	10.8166	8.80634	9.80579	12.9423		1.10587	6.0346	1.54525	4.67686	5.73157	1.0985	1.13049	7.04119	6.54631	4.81054		9.5356	8.22306	9.55614	6.30999	9.40335	9.24706
9.47635	8.86784	9.60734	9.16808	8.1252	10.3234	9.31808	9.4693	11.0876	9.84496		1.04512	4.08978	6.88598	1.09527	1.16429	4.76575	5.47338	1.85812	1.05992	1.15312		10.3529	10.1971	8.26909	12.3742	10.0922	7.25701	10.8395	9.03193	9.86094	13.0818		1.10526	5.99453	1.53753	4.70604	5.76995	1.09796	1.1007	7.06394	6.55767	4.79139		9.71733	8.27098	9.5778	6.37156	9.29582	9.26033
9.2206	8.89411	9.58906	9.1669	7.94096	10.391	9.14942	9.48549	11.0247	9.89722		1.0486	4.07716	6.90643	1.09387	1.15631	4.7649	5.40856	1.84847	1.06318	1.1529		10.4984	10.253	8.29664	12.3188	9.98574	7.1872	10.8729	8.96584	9.89916	13.3081		1.10515	5.94354	1.54631	4.72695	5.80493	1.10333	1.13022	7.07717	6.4838	4.83879		9.59238	8.25329	9.54678	6.40497	9.35016	9.23644
9.46213	8.84034	9.63615	9.14499	8.22254	10.3149	9.33784	9.48139	11.0389	9.86986		1.04972	4.06618	6.89589	1.09397	1.18671	4.76439	5.44396	1.84732	1.0596	1.15336		10.5689	10.2649	8.21638	12.2858	10.1603	7.28626	10.8528	8.85248	9.85369	13.3101		1.09809	5.98053	1.54777	4.76158	5.79826	1.10449	1.12047	7.06283	6.46729	4.81028		9.64776	8.31155	9.50667	6.21975	9.41061	9.2366
9.47309	8.78051	9.53734	9.08304	7.87096	10.1415	8.95238	9.38763	11.0793	9.8878		1.04709	4.10973	6.88874	1.09536	1.16209	4.77383	5.41099	1.84112	1.0575	1.1521		9.29154	10.2754	8.19674	12.1403	9.98544	7.00479	10.9048	8.96935	9.8326	13.2158		1.10803	5.97239	1.55286	4.70523	5.81523	1.10931	1.12974	7.09435	6.48386	4.77943		9.56652	8.36615	9.50018	6.23391	9.4454	9.28064
9.43869	8.91644	9.5483	9.10462	8.08295	10.3766	9.21193	9.41408	11.21	9.85419		1.04665	4.10539	6.9048	1.09526	1.16316	4.77982	5.42625	1.85318	1.06152	1.14802		9.76301	10.3764	8.17765	12.0779	9.96936	7.2494	10.8048	8.98786	9.8384	13.1625		1.10709	5.93299	1.55581	4.71354	5.87889	1.1015	1.11244	7.09234	6.04318	4.77537		9.74462	8.2281	9.5414	6.21907	9.42339	9.29239
9.33008	8.95505	9.6286	9.05264	8.28311	10.2971	9.41556	9.44537	10.88	9.8295		1.04682	4.12963	6.88466	1.09435	1.15624	4.7891	5.45112	1.84935	1.0611	1.1472		10.2082	10.2177	8.1126	12.0561	9.96358	7.42974	10.8963	8.87541	9.78773	13.2411		1.1016	5.99289	1.55684	4.70931	5.87597	1.10086	1.10933	7.09867	6.17554	4.87526		9.59367	8.24154	9.52768	6.15963	9.46016	9.27151
9.27789	8.9951	9.6129	9.16396	8.40257	10.2596	9.2818	9.43589	10.8506	9.87352		1.04948	4.14226	6.88469	1.09371	1.1699	4.78597	5.49285	1.85216	1.05883	1.14668		10.2358	10.186	8.08943	11.8455	10.0794	7.04687	10.7933	8.93807	9.78085	13.2053		1.1042	5.93363	1.56172	4.66496	5.88811	1.09779	1.08152	7.10065	6.23807	4.81824		9.53808	8.24571	9.52125	6.23688	9.42378	9.27937
9.31361	8.82775	9.55503	9.13102	7.99623	10.5441	9.3727	9.47146	11.1008	9.89617		1.05078	4.1399	6.88564	1.09506	1.15739	4.78299	5.44804	1.83573	1.06192	1.14962		9.89362	10.3292	8.07569	11.5983	10.0133	7.26486	10.8572	8.97664	9.69714	13.5381		1.10906	5.97618	1.5624	4.65296	5.88712	1.08899	1.1229	7.16904	6.21384	4.8358		9.68916	8.3036	9.48396	6.16383	9.47264	9.31972
9.22138	8.78419	9.60673	9.20425	8.33708	10.4215	9.33806	9.3463	11.0323	9.87842		1.04821	4.11019	6.87936	1.0927	1.15116	4.78769	5.46161	1.83001	1.06072	1.14853		10.4355	10.3222	8.00602	11.5777	10.0676	6.93995	10.7958	8.96647	9.69018	13.6551		1.10044	6.06191	1.56836	4.61	5.90251	1.018	1.0879	7.16906	6.09381	4.8027		9.60809	8.2469	9.48515	6.33031	9.44688	9.26117
9.35722	8.94254	9.62342	9.14133	8.27917	10.1642	9.36418	9.49399	11.0267	9.85208		1.04994	4.11277	6.88032	1.09136	1.16279	4.78797	5.44692	1.85434	1.06019	1.14682		11.4509	10.2891	7.95343	11.4613	10.2501	7.07618	10.8112	9.0474	9.68138	13.5917		1.09907	6.09324	1.55864	4.6154	5.87549	1.05709	1.09873	7.14193	6.29744	4.71877		9.73989	8.24763	9.54277	6.36901	9.38557	9.2759
9.26676	8.83112	9.60101	9.17436	8.13624	10.4252	9.37416	9.4706	11.1358	9.85314		1.0469	4.11279	6.87849	1.09293	1.15884	4.79243	5.36033	1.82839	1.05999	1.14833		10.8283	10.3162	7.94118	11.3727	10.0128	7.10959	10.7663	8.9362	9.70999	13.581		1.10645	6.10424	1.57142	4.56215	5.87059	1.08272	1.10062	7.1245	6.3621	4.7975		9.66696	8.24987	9.57249	6.27591	9.42261	9.27524
9.10263	8.8925	9.5187	9.13054	8.31255	10.445	9.34759	9.4081	11.1422	9.85658		1.0492	4.14308	6.87262	1.09153	1.17373	4.79009	5.39382	1.85339	1.06103	1.14759		9.57282	10.2449	7.92582	11.2829	10.0007	7.0821	10.8041	8.86598	9.69155	13.6488		1.10261	6.11376	1.56051	4.56546	5.90418	1.08755	1.13222	7.12392	6.30624	4.82959		9.55484	8.15003	9.63314	6.22178	9.38164	9.28427
9.55073	8.87856	9.57749	9.14067	8.06447	10.4114	9.4462	9.48923	11.1576	9.83946		1.04649	4.15097	6.87005	1.09193	1.16393	4.80664	5.37876	1.8602	1.05818	1.14694		10.9589	10.2037	7.88492	11.2427	9.91549	6.95634	10.7021	9.11505	9.73513	13.834		1.10647	6.16927	1.56253	4.52485	5.91436	1.0735	1.13683	7.14525	6.45066	4.82116		9.65138	8.27202	9.65649	6.2421	9.29205	9.28434
9.33197	8.92581	9.48351	9.15287	7.91016	10.4724	9.3653	9.34466	11.1617	9.80033		1.04614	4.15023	6.87929	1.09143	1.17102	4.81147	5.42521	1.84782	1.06216	1.15009		10.9743	10.4379	7.85849	11.1589	10.2307	7.06061	10.7472	8.86695	9.76148	13.8384		1.1048	6.14724	1.56435	4.52285	5.95116	1.06478	1.10749	7.13654	6.41198	4.75558		9.44473	8.15756	9.65989	6.3065	9.47296	9.30666
9.24955	8.85919	9.57074	9.16313	8.51057	10.3925	9.37116	9.4138	10.8899	9.88709		1.046	4.07757	6.88587	1.09247	1.14307	4.82088	5.50173	1.85448	1.06205	1.15224		10.5468	10.21	7.82315	11.128	10.1914	6.91339	10.7508	8.97706	9.76264	13.548		1.10323	6.13418	1.56668	4.52285	6.01021	1.08056	1.11311	7.11723	6.33236	4.77332		9.57427	8.20166	9.63909	6.07611	9.45108	9.27841
9.21879	8.89811	9.64876	9.17337	8.21989	10.3914	9.36268	9.38862	10.984	9.82754		1.04754	4.08739	6.88137	1.09173	1.15696	4.83284	5.43369	1.83071	1.05902	1.15058		10.0222	10.3505	7.80119	11.0929	10.0911	7.30194	10.7472	8.89797	9.77539	13.5388		1.1074	6.06842	1.57342	4.54988	6.10537	1.09223	1.12666	7.1791	6.37799	4.74387		9.4583	8.2911	9.58025	6.33422	9.46417	9.26445
9.22277	8.87871	9.55347	9.10955	8.07595	10.3112	9.42372	9.47589	10.9783	9.84889		1.04598	4.12512	6.87869	1.09208	1.18016	4.81799	5.48976	1.83128	1.06337	1.14894		9.74592	10.3486	7.7842	11.0312	10.0244	6.8664	10.7854	8.99024	9.80093	13.6531		1.10608	6.05814	1.5747	4.53837	6.13407	1.10114	1.0945	7.18301	6.44493	4.74945		9.47179	8.27446	9.59056	6.17161	9.41738	9.26569
9.25661	8.96262	9.56314	9.09887	8.49763	10.1197	9.25512	9.45682	10.998	9.8596		1.04445	4.14922	6.90436	1.09229	1.171	4.81457	5.4001	1.85143	1.05792	1.15087		10.4741	10.178	7.76342	11.1043	10.1698	7.22254	10.7164	9.04264	9.79959	13.869		1.10531	6.02055	1.55979	4.5584	6.16848	1.10173	1.11161	7.14132	6.50189	4.78051		9.61999	8.2273	9.59227	6.40157	9.47101	9.28357
9.24157	8.89597	9.53584	9.13542	8.56489	10.2508	9.53592	9.40061	10.9895	9.83788		1.04364	4.14204	6.91135	1.09181	1.1771	4.80049	5.40716	1.86359	1.06144	1.1511		11.2995	10.1428	7.77269	11.0818	10.079	6.76887	10.8163	9.02747	9.76382	13.8643		1.10562	6.01779	1.57673	4.52506	6.21872	1.09609	1.12517	7.13593	6.49716	4.7084		9.469	8.23345	9.57663	6.31991	9.4545	9.22957
9.24041	8.83019	9.47042	9.17351	8.33556	10.424	9.71132	9.37169	11.087	9.81433		1.04571	4.09473	6.87924	1.09142	1.18472	4.79572	5.41732	1.85835	1.05206	1.14437		11.1208	10.1204	7.74002	11.157	10.0104	7.08346	10.7482	9.08952	9.79321	13.7092		1.09857	5.96074	1.5657	4.54146	6.21724	1.07833	1.10768	7.18038	6.63915	4.68883		9.40328	8.24722	9.52854	6.24878	9.34902	9.21812
9.23	8.82093	9.59196	9.23563	8.1157	10.5256	9.6052	9.43302	10.8986	9.80962		1.04801	4.09718	6.89274	1.09019	1.16693	4.78235	5.43861	1.85919	1.05777	1.14131		10.3145	10.4754	7.73792	11.1763	10.0109	6.88281	10.8148	8.96349	9.78462	13.5149		1.10817	5.993	1.57282	4.55443	6.22043	1.08769	1.12444	7.26488	6.54596	4.75633		9.43967	8.24298	9.5356	6.23039	9.3585	9.25423
9.21793	8.82206	9.62285	9.14117	8.3915	10.2634	9.68964	9.37474	11.139	9.81134		1.0469	4.12179	6.9003	1.09146	1.16844	4.79249	5.38318	1.87411	1.05506	1.1411		10.3464	10.3846	7.75818	11.2976	9.94229	7.11847	10.7398	8.85615	9.7437	13.2248		1.10014	6.03024	1.57879	4.55266	6.19327	1.08912	1.13652	7.2777	6.51928	4.80489		9.55781	8.2116	9.56897	6.31421	9.36606	9.20777
9.24123	8.86278	9.4679	9.17309	8.11193	10.3204	9.67721	9.4336	10.9961	9.86899		1.04865	4.18877	6.89084	1.09139	1.17256	4.7657	5.41449	1.85071	1.05498	1.14384		11.4766	10.1992	7.77365	11.2109	10.1238	6.88295	10.8002	9.00111	9.71544	13.0992		1.10434	6.02004	1.5635	4.60502	6.14617	1.09517	1.09745	7.27265	6.51379	4.78534		9.42571	8.27595	9.42414	6.1882	9.37233	9.24531
9.30601	8.93416	9.66716	9.06337	8.17767	10.4095	9.53309	9.48571	11.0507	9.87927		1.04602	4.14822	6.90481	1.09087	1.15543	4.76984	5.3827	1.84119	1.0575	1.14077		10.3117	10.3415	7.81669	11.4762	10.1538	7.04028	10.7559	8.87797	9.72492	13.0051		1.09791	6.01823	1.57027	4.62448	6.12768	1.0985	1.09874	7.22811	6.40057	4.83486		9.44009	8.30484	9.46481	6.16769	9.32016	9.22204
9.17544	8.87946	9.61073	9.14477	8.25438	10.6173	9.42563	9.49864	11.0117	9.89655		1.04367	4.15581	6.90634	1.09162	1.16832	4.75836	5.416	1.84678	1.05903	1.13925		9.86524	10.199	7.818	11.5728	10.1872	6.8857	10.8393	8.94261	9.71814	12.849		1.10488	6.00971	1.56661	4.62531	6.08053	1.09529	1.11327	7.24881	6.46025	4.79048		9.69405	8.19227	9.48436	6.12983	9.27115	9.23035
9.21229	8.79655	9.60525	9.12479	8.31888	10.1555	9.98424	9.41537	10.9818	9.85701		1.04235	4.16645	6.88904	1.09	1.1655	4.75659	5.45686	1.82252	1.06054	1.14132		10.3363	10.4795	7.87247	11.4922	10.2442	7.05203	10.7386	8.93501	9.71118	12.8672		1.10411	6.05052	1.57269	4.63897	6.0602	1.09626	1.15028	7.22183	6.40654	4.79436		9.62902	8.16287	9.46655	6.12559	9.36138	9.19854
9.28488	8.89717	9.50244	9.11676	8.3001	10.3064	9.72837	9.52944	10.7904	9.83096		1.04158	4.17584	6.90855	1.09031	1.158	4.75412	5.50324	1.84551	1.06284	1.13916		9.87017	10.3227	7.93082	11.6804	10.124	7.27804	10.829	9.12937	9.71918	12.8569		1.1102	6.06373	1.57664	4.66074	6.04148	1.10364	1.12196	7.19229	6.36735	4.77349		9.62987	8.15917	9.45708	6.12451	9.4061	9.17165
9.27615	8.76208	9.55844	9.09513	8.0982	10.5954	9.65295	9.45589	11.0967	9.79915		1.04373	4.19068	6.89508	1.09032	1.17532	4.74955	5.48634	1.85023	1.06433	1.14356		10.4766	10.2659	8.01792	11.8499	10.0605	6.90761	10.7689	8.96498	9.66977	13.0256		1.1054	6.07829	1.56948	4.66573	6.07269	1.10716	1.11709	7.23746	6.25319	4.80604		9.47616	8.24995	9.41614	6.18922	9.38233	9.22741
9.23424	8.95862	9.46823	9.14231	8.01432	10.3262	9.58203	9.38551	11.0271	9.77562		1.04244	4.16578	6.91649	1.09002	1.1626	4.75437	5.40209	1.85663	1.05969	1.14632		10.8622	10.1556	8.10714	11.8576	10.1518	6.7586	10.7961	8.85161	9.68585	13.2806		1.096	6.11346	1.56579	4.69372	6.05289	1.10632	1.13408	7.30753	6.27626	4.78439		9.48882	8.22453	9.44378	6.04355	9.35444	9.22254
9.30092	8.95609	9.58436	9.0841	8.29754	10.6749	9.82022	9.44028	11.0114	9.79156		1.04345	4.16074	6.89505	1.09008	1.15208	4.76302	5.42426	1.83039	1.06315	1.14121		10.551	10.3015	8.18751	12.1069	10.1171	7.04764	10.7428	9.03164	9.64113	13.1977		1.10386	6.12154	1.5663	4.67725	6.07549	1.09962	1.13551	7.29568	6.19354	4.78639		9.56107	8.18005	9.4178	6.0562	9.38718	9.20059
9.40811	8.86655	9.57292	9.1805	8.12849	10.2815	9.84694	9.43168	11.1044	9.83931		1.04392	4.17741	6.91001	1.0883	1.16152	4.76087	5.40212	1.84705	1.0597	1.14328		10.1318	10.24	8.24268	12.2881	10.2273	6.9273	10.7852	8.93638	9.63569	13.3331		1.10149	6.07022	1.5734	4.65887	6.0754	1.10163	1.13153	7.32498	6.30907	4.70468		9.57244	8.23607	9.44149	6.12541	9.34361	9.19429
9.14402	8.85149	9.49032	9.13146	8.01587	10.6145	9.7902	9.48723	10.9856	9.83234		1.04365	4.13427	6.89894	1.08785	1.14072	4.75354	5.47175	1.84466	1.06449	1.1417		10.4002	10.2912	8.23925	12.276	10.2035	6.76673	10.7387	9.01158	9.62633	13.6378		1.10626	6.04413	1.56507	4.64917	6.07773	1.09648	1.12981	7.32662	6.21243	4.68672		9.58194	8.15771	9.44911	6.14122	9.336	9.16765
9.35262	8.86755	9.45024	9.11799	8.5326	10.4773	9.89258	9.36741	10.9384	9.83865		1.04553	4.19747	6.89045	1.09003	1.15516	4.75024	5.36521	1.85071	1.0599	1.13956		9.51775	10.1194	8.25916	12.4336	10.2062	6.7946	10.7733	8.91762	9.60577	13.7367		1.10363	6.08108	1.56755	4.64231	6.05931	1.10807	1.13007	7.32042	6.33399	4.70226		9.56491	8.28396	9.38087	6.05748	9.30477	9.17841
9.25019	8.77918	9.53069	9.11313	8.42052	10.494	9.73751	9.37176	11.0488	9.82764		1.04051	4.18028	6.89464	1.0905	1.14747	4.75629	5.38131	1.87715	1.06077	1.13831		9.71587	10.0874	8.23455	12.7371	10.0972	6.84131	10.726	9.14313	9.56996	13.8062		1.10093	6.08315	1.56583	4.6379	5.99235	1.10488	1.1178	7.29708	6.22673	4.65385		9.58079	8.24034	9.385	6.15196	9.38298	9.20182
9.27866	8.7884	9.5617	9.05653	8.51504	10.4512	9.84626	9.47164	11.1657	9.83707		1.04291	4.20408	6.90256	1.0885	1.1745	4.76185	5.47184	1.8746	1.06259	1.13756		10.8554	10.0787	8.25285	12.656	10.1587	7.03901	10.7047	9.03957	9.60971	13.7773		1.10012	6.04501	1.57407	4.57647	5.9883	1.09892	1.12723	7.29584	5.75137	4.59072		9.54956	8.18141	9.45077	6.07938	9.33637	9.18091
9.34952	8.7897	9.47703	9.14137	8.1507	10.902	9.84832	9.379	11.1929	9.78222		1.0422	4.20958	6.90167	1.08804	1.15957	4.76291	5.37629	1.845	1.06323	1.13571		10.1315	10.0638	8.21909	12.5928	10.0493	7.02526	10.6506	8.86848	9.61965	13.6456		1.10213	6.06738	1.56828	4.54473	6.01791	1.10387	1.11844	7.30672	6.29529	4.61259		9.47376	8.21437	9.48457	6.15688	9.23584	9.17421
9.38063	8.82232	9.5362	9.09866	8.33151	10.9005	9.81775	9.46682	10.9864	9.72029		1.04739	4.18472	6.92066	1.08947	1.15836	4.76691	5.36694	1.85173	1.06086	1.1346		10.1435	10.1119	8.22037	12.6492	10.0344	7.21643	10.6058	8.97618	9.65895	13.7241		1.09792	6.04561	1.56889	4.52226	5.98908	1.0982	1.13257	7.42754	6.24489	4.5871		9.72269	8.2066	9.5144	6.16721	9.34528	9.16743
9.35752	8.74609	9.40014	9.09901	8.27047	10.2364	9.55764	9.43386	11.1194	9.77063		1.04284	4.18024	6.90543	1.08855	1.17145	4.75823	5.36456	1.87019	1.05918	1.13821		9.67831	10.0749	8.26074	12.781	10.024	7.30233	10.6222	8.92001	9.65931	13.8282		1.09882	6.03658	1.57561	4.47825	5.98841	1.10348	1.10964	7.39777	6.31893	4.60462		9.72906	8.20078	9.5351	6.13562	9.32101	9.14968
9.24271	8.89304	9.44408	9.1397	8.47544	10.629	9.43684	9.37268	11.3001	9.78691		1.04113	4.20315	6.90038	1.08873	1.16223	4.74855	5.33645	1.82371	1.05894	1.13821		9.68225	10.129	8.26485	12.5762	10.0872	7.3687	10.5094	8.93328	9.62532	13.7643		1.10159	6.06443	1.56901	4.49328	5.97184	1.09588	1.11634	7.29662	6.17745	4.61936		9.66519	8.11529	9.50467	6.04532	9.27441	9.16222
9.24581	8.90631	9.54948	9.11926	8.50122	10.657	9.57695	9.37171	11.4846	9.7549		1.04105	4.1887	6.92118	1.08955	1.16512	4.73822	5.39544	1.86411	1.05281	1.13581		10.688	10.1392	8.23085	12.6036	10.0423	7.26866	10.5742	8.86991	9.62322	13.8324		1.09777	6.14749	1.57653	4.47686	5.95101	1.10693	1.10246	7.34096	6.32158	4.6236		9.48702	8.16741	9.49255	6.12158	9.27443	9.16882
9.39199	8.82295	9.56816	9.09237	8.55846	10.6101	9.36644	9.3542	11.2622	9.82694		1.04196	4.1801	6.9162	1.08932	1.15556	4.74312	5.39472	1.87221	1.0565	1.13915		10.8993	10.0261	8.24455	12.6008	10.0011	7.18937	10.4968	9.06835	9.64836	13.9133		1.10404	6.18876	1.57424	4.47389	5.94101	1.09832	1.03306	7.34886	6.19554	4.56594		9.61145	8.11255	9.49264	6.20971	9.26204	9.1153
9.39163	8.90577	9.51218	9.09592	8.31774	11.0123	9.31801	9.39527	11.3537	9.81825		1.04242	4.19563	6.90692	1.08778	1.15481	4.74699	5.39193	1.87726	1.05508	1.13793		10.3828	9.96165	8.30381	12.4689	9.94013	7.0586	10.5204	9.0482	9.65249	13.8459		1.09983	6.17757	1.57359	4.47539	5.90734	1.09625	1.08918	7.31489	6.39888	4.60565		9.60793	8.3071	9.51004	6.06538	9.27276	9.14932
9.5736	8.89049	9.54523	9.13102	8.63224	10.8914	9.37961	9.38783	11.3199	9.80311		1.04176	4.22856	6.89593	1.0884	1.16068	4.74646	5.50727	1.85562	1.06233	1.13379		11.0105	10.2689	8.30928	12.4054	10.1666	7.22486	10.5051	9.02117	9.66194	13.7708		1.09856	6.21108	1.57763	4.4916	5.90379	1.09246	1.1006	7.31295	6.39559	4.65261		9.55521	8.1429	9.51272	6.13005	9.32858	9.15393
9.34663	8.90499	9.43773	9.1369	8.63566	10.8033	9.27442	9.41308	11.2036	9.82872		1.04381	4.20009	6.91268	1.0912	1.15697	4.7611	5.45698	1.85183	1.06106	1.13667		10.5973	10.2612	8.27027	12.4857	9.94921	7.19935	10.5156	9.06382	9.63008	14.0282		1.09773	6.2152	1.57161	4.47408	5.89328	1.0985	1.11227	7.27992	6.31668	4.61854		9.44623	8.26575	9.49636	5.94983	9.3422	9.1628
9.45053	8.86458	9.52824	9.0687	8.1974	10.7277	9.22666	9.33801	11.4962	9.80769		1.03957	4.20839	6.90358	1.0902	1.15514	4.78087	5.43558	1.8353	1.05968	1.13605		9.67663	10.1867	8.24947	12.3678	10.0848	7.41347	10.4621	8.88869	9.64654	13.8128		1.09567	6.21031	1.57913	4.45753	5.93238	1.10193	1.11921	7.28771	6.322	4.60728		9.53084	8.31326	9.4803	5.91826	9.20568	9.15888
9.57928	8.85669	9.5294	9.06632	8.03478	10.8552	9.38487	9.39377	11.4184	9.73442		1.03718	4.22061	6.9022	1.0913	1.16705	4.78154	5.40352	1.86399	1.06316	1.13085		11.4436	10.1019	8.2252	12.2594	9.8927	6.97487	10.6059	8.89856	9.59883	13.7685		1.09851	6.15605	1.58643	4.48299	5.92058	1.1073	1.10798	7.31036	6.28378	4.62881		9.53932	8.23919	9.5082	6.00498	9.26131	9.18117
9.45737	8.8156	9.45041	9.05738	8.38923	10.554	9.22476	9.31455	11.5656	9.79563		1.03539	4.19566	6.89872	1.09128	1.15456	4.78619	5.40073	1.86604	1.06146	1.13365		9.52062	10.0948	8.19861	12.1677	10.0855	7.25563	10.6142	8.84407	9.60804	13.7477		1.09838	6.12822	1.58531	4.49411	5.92348	1.10774	1.12532	7.33354	6.20393	4.60611		9.57467	8.22225	9.47571	6.00868	9.28752	9.21743
9.47963	8.84689	9.50807	9.11153	8.24367	11.0029	9.43984	9.40028	11.4066	9.81725		1.0416	4.1929	6.89955	1.09211	1.15226	4.79921	5.38038	1.86719	1.05676	1.13498		11.6101	10.1651	8.21305	12.2193	10.187	7.26957	10.6345	8.81329	9.59518	13.6219		1.09616	6.13514	1.57889	4.45521	5.90467	1.11138	1.12789	7.2745	6.24605	4.71011		9.62344	8.27152	9.46116	5.98834	9.23382	9.21325
9.3754	8.84163	9.60959	9.02458	8.23954	10.6635	9.11142	9.32489	11.5028	9.80081		1.04146	4.18421	6.89806	1.09384	1.19262	4.79374	5.46442	1.84912	1.0551	1.13296		9.79401	10.1729	8.19996	12.0229	10.3018	7.14756	10.6537	9.00349	9.59465	13.5874		1.10608	6.05353	1.58391	4.46009	5.93782	1.1045	1.08059	7.38869	6.16543	4.67844		9.87631	8.16011	9.47497	5.8952	9.29481	9.22138
9.35615	8.71329	9.56943	9.11236	8.60977	10.5179	9.24997	9.34571	11.0801	9.74816		1.0365	4.22881	6.91003	1.0939	1.1678	4.8008	5.43298	1.84	1.05764	1.13379		10.363	10.0254	8.16085	12.0788	10.0684	7.39253	10.6099	8.89383	9.58146	13.5804		1.09806	6.05874	1.58033	4.49815	5.95717	1.10068	1.0964	7.3896	6.13204	4.70706		9.56656	8.16704	9.49121	6.1017	9.25396	9.2466
9.38342	8.8648	9.39968	9.11508	8.62579	10.651	9.11166	9.31076	11.4236	9.78979		1.03813	4.20089	6.91224	1.09432	1.15067	4.79277	5.44282	1.84037	1.05673	1.1338		10.232	10.1956	8.17887	12.0115	9.9592	7.30722	10.6726	8.80506	9.55499	13.417		1.09096	6.0262	1.58417	4.47805	5.98016	1.09928	1.1457	7.28857	6.13134	4.65059		9.49653	8.2581	9.47913	5.98407	9.29581	9.20776
9.41467	8.73156	9.45502	9.05875	8.28121	10.8269	9.20659	9.32433	11.2354	9.80503		1.03178	4.20098	6.90965	1.09295	1.16724	4.77398	5.45339	1.8388	1.0586	1.13465		9.76981	10.1626	8.15447	11.9261	9.95159	7.29808	10.6073	9.02203	9.54755	13.4234		1.09913	5.96521	1.58337	4.51389	6.04872	1.11021	1.11785	7.35443	6.18691	4.75171		9.72741	8.16307	9.44577	5.88423	9.30926	9.20574
9.37399	8.85894	9.52684	9.08107	8.56424	10.8381	9.54684	9.35628	11.3627	9.83646		1.03659	4.20673	6.89831	1.09196	1.16729	4.76175	5.48389	1.8543	1.0603	1.12963		9.31513	9.95429	8.1358	11.8135	10.1073	7.24958	10.6479	8.86654	9.50935	13.3255		1.10014	6.00955	1.58595	4.50659	6.08042	1.10192	1.11055	7.39622	6.25685	4.63006		9.57014	8.17888	9.48593	6.12924	9.29597	9.20364
9.31678	8.84284	9.38258	9.09444	8.72112	10.5187	9.29765	9.28346	11.3464	9.81386		1.03727	4.19154	6.9135	1.09086	1.16586	4.76483	5.49017	1.86563	1.0552	1.13399		11.3977	10.0752	8.16766	11.8564	10.0279	7.36665	10.5698	9.0403	9.50268	13.3387		1.09384	5.96908	1.58705	4.51614	6.12747	1.10588	1.11322	7.33334	6.18503	4.67397		9.4039	8.073	9.48327	5.94616	9.27792	9.22677
9.19358	8.80816	9.44486	9.07406	8.48875	10.497	9.28249	9.38848	11.3936	9.74924		1.038	4.21684	6.90486	1.09077	1.15997	4.76522	5.41229	1.84427	1.05961	1.13326		10.955	9.96146	8.15407	11.7403	10.0889	7.16335	10.6445	8.96071	9.50137	13.2727		1.09437	5.98064	1.58583	4.50981	6.20326	1.102	1.07954	7.31619	6.24934	4.68867		9.40027	8.15937	9.47396	5.97813	9.19785	9.20531
9.36603	8.78606	9.39508	9.03969	8.66004	10.605	9.44868	9.36475	11.3832	9.76972		1.03592	4.26048	6.90057	1.0915	1.14487	4.75876	5.48826	1.84878	1.06171	1.1303		10.641	9.87982	8.23425	11.7994	9.91662	7.4732	10.5929	8.92269	9.4614	13.2244		1.09852	5.98678	1.58302	4.50793	6.24556	1.10115	1.12819	7.34898	6.09165	4.7702		9.39688	8.15571	9.44602	5.90433	9.22372	9.17069
9.22009	8.90191	9.50447	9.08812	8.57773	10.7764	9.27171	9.35341	11.2345	9.81688		1.03717	4.26707	6.89497	1.0928	1.17357	4.75736	5.46824	1.84908	1.05531	1.12908		9.37827	10.1072	8.18217	11.8304	10.1296	7.53301	10.6449	8.83133	9.47375	13.313		1.09713	6.02194	1.57932	4.4857	6.21338	1.09915	1.11647	7.41803	6.19584	4.76692		9.36378	8.26831	9.44028	5.95141	9.22887	9.1444
9.30932	8.81753	9.46971	9.04549	8.6133	10.7405	9.12834	9.23573	11.1915	9.79963		1.03587	4.24207	6.90639	1.09363	1.16037	4.75826	5.43139	1.85349	1.05288	1.13087		9.36913	9.97471	8.20085	11.9347	9.90408	7.26249	10.6103	9.00498	9.46687	13.378		1.09583	5.99043	1.58233	4.4944	6.20807	1.10224	1.09359	7.30189	6.45397	4.62074		9.39825	8.21709	9.41649	6.01644	9.187	9.10935
9.18172	8.91515	9.42767	9.10128	8.6874	10.5522	9.49988	9.31717	11.0707	9.74389		1.03955	4.2287	6.90818	1.09287	1.16367	4.7625	5.40228	1.85026	1.05364	1.12801		10.0153	10.0588	8.3132	11.9433	9.95532	7.3777	10.654	9.0924	9.54468	13.4397		1.09198	5.98864	1.58008	4.5284	6.20834	1.09696	1.11755	7.27947	6.38594	4.69415		9.31743	8.2035	9.45009	5.96242	9.20125	9.10925
9.2351	8.94492	9.49443	9.04783	8.76149	10.6057	9.45573	9.39389	11.0695	9.76669		1.03747	4.24859	6.90791	1.09162	1.15132	4.75408	5.43855	1.83501	1.05546	1.12875		10.5312	9.91095	8.25373	11.9862	9.98348	7.39298	10.6322	8.9903	9.53128	13.3621		1.09519	5.98234	1.58852	4.48961	6.20611	1.09524	1.09584	7.24298	6.57014	4.81998		9.42795	8.20674	9.47392	6.05108	9.30188	9.12166
9.25339	8.74925	9.46631	9.05286	8.70815	10.6464	9.41108	9.38308	11.0717	9.79577		1.03541	4.24412	6.90986	1.09288	1.17136	4.76649	5.44918	1.79771	1.06249	1.12786		10.606	10.1103	8.27225	12.0461	10.139	7.2675	10.63	8.9206	9.48141	13.3142		1.09003	5.96347	1.59198	4.49125	6.20216	1.10529	1.12729	7.16681	6.47796	4.82522		9.20271	8.18197	9.43747	5.9541	9.21463	9.08904
9.28099	8.81578	9.54352	9.06988	8.71886	10.716	9.43758	9.33365	11.1357	9.76272		1.03818	4.23372	6.91752	1.09114	1.15158	4.77116	5.42034	1.55196	1.05326	1.12305		9.86267	9.96644	8.25772	12.0161	10.1092	7.40491	10.6347	8.91769	9.47196	13.3435		1.09761	6.01982	1.59099	4.49957	6.2093	1.10335	1.10114	7.19341	6.55979	4.76324		9.23058	8.15794	9.49011	5.8799	9.23554	9.08896
9.10413	8.8104	9.47203	9.02488	8.3738	10.6923	9.3809	9.3499	11.3946	9.76721		1.03678	4.28318	6.9182	1.09093	1.14772	4.7728	5.43706	1.36917	1.0538	1.1245		11.1782	9.89021	8.21639	12.2407	10.0367	7.52312	10.6489	8.8279	9.45733	13.4991		1.09525	6.01443	1.59322	4.49136	6.20336	1.10148	1.1453	7.28758	6.53106	4.74017		9.16462	8.16161	9.4741	5.8999	9.20565	9.09212
9.12408	8.92106	9.38105	9.04599	8.49486	10.7477	9.3233	9.37999	11.1798	9.7887		1.03461	4.26334	6.92435	1.09018	1.15675	4.75339	5.4394	1.32363	1.05095	1.12582		9.85618	10.0008	8.2284	12.3519	10.1612	7.26318	10.6282	9.0207	9.43008	13.3727		1.10135	6.10663	1.58895	4.46102	6.24637	1.09771	1.1765	7.23308	6.32831	4.63849		9.07414	8.21216	9.48662	5.97035	9.23361	9.10849
9.14126	8.77063	9.42382	9.08419	8.59887	10.7645	9.1589	9.3529	11.1894	9.77907		1.03762	4.27361	6.92796	1.09056	1.15623	4.75786	5.37959	1.36269	1.05731	1.1256		10.2637	9.87491	8.23392	12.4866	10.1602	7.45447	10.6286	8.98922	9.4834	13.1222		1.10098	6.06806	1.58863	4.5278	6.30103	1.11128	1.09323	7.18875	6.3606	4.71797		9.28801	8.22082	9.4865	5.97798	9.20118	9.1026
9.49432	8.75047	9.41348	9.05388	8.95131	10.8316	9.24243	9.31645	11.1932	9.76909		1.03742	4.25559	6.91853	1.08952	1.15721	4.76544	5.51672	1.41746	1.06203	1.12696		10.9532	9.89869	8.22184	12.628	9.95155	7.4185	10.6743	8.86284	9.43649	12.7924		1.09328	6.10945	1.58939	4.53381	6.32386	1.10862	1.10625	7.20397	6.43935	4.61728		9.16999	8.25352	9.49882	5.94118	9.23667	9.12012
9.21239	8.82278	9.50334	9.10503	8.56061	10.7622	9.13136	9.35829	11.1174	9.72601		1.03502	4.2641	6.91378	1.08977	1.16338	4.75543	5.38603	1.44266	1.0542	1.12863		10.7697	10.1044	8.22071	12.8287	10.1918	7.11546	10.5912	8.86965	9.46742	12.8716		1.09691	6.10821	1.58471	4.54826	6.28101	1.11378	1.1175	7.16944	6.58492	4.55378		9.47086	8.12989	9.48807	5.97288	9.21016	9.10161
9.16871	8.93927	9.47256	9.07175	8.73403	10.8363	9.19301	9.33196	11.024	9.713		1.03475	4.26546	6.96187	1.08953	1.14774	4.76235	5.41961	1.52153	1.0556	1.12547		10.3987	9.9044	8.205	12.7695	10.0639	7.32057	10.6744	8.91911	9.4811	13.0213		1.10028	6.14259	1.59295	4.51592	6.28755	1.1054	1.12711	7.14219	6.47689	4.5713		9.32494	8.23065	9.52327	5.90433	9.25626	9.11081
9.27953	8.77748	9.41746	9.09456	8.2238	10.5434	9.38344	9.36445	11.2318	9.72892		1.03527	4.25967	6.95573	1.08919	1.16049	4.76217	5.53871	1.52948	1.05918	1.12401		10.1415	10.098	8.21404	12.817	10.2492	7.55185	10.5914	8.91356	9.45592	12.9498		1.09738	6.13723	1.59258	4.52774	6.31062	1.10016	1.10113	7.14083	6.42784	4.60573		9.37674	8.15586	9.45153	5.98787	9.11491	9.11315
9.149	9.0118	9.42717	9.01773	8.51069	10.5687	9.20502	9.2686	11.2095	9.7621		1.03404	4.2684	6.93217	1.08704	1.1458	4.7722	5.50709	1.58442	1.05773	1.12045		10.9682	10.0731	8.23508	12.9864	10.0271	7.68992	10.6855	9.12228	9.46868	12.8482		1.09268	6.17775	1.591	4.55772	6.26956	1.09882	1.13658	7.13433	6.47268	4.60752		9.48984	8.23066	9.3905	5.96001	9.15083	9.13331
9.19843	8.95383	9.42692	9.00812	8.82476	10.709	9.45654	9.36257	11.0834	9.75119		1.03368	4.28187	6.96154	1.08708	1.16356	4.76477	5.49286	1.62663	1.05647	1.11883		10.2275	10.1781	8.24526	12.907	10.059	7.12294	10.6282	8.98347	9.49087	13.1438		1.09708	6.21087	1.58773	4.51116	6.26857	1.11289	1.13884	7.14119	6.40363	4.56744		9.38039	8.17734	9.41294	5.80886	9.07068	9.11054
9.18781	8.94998	9.35095	9.02364	8.4173	10.8152	9.34394	9.29714	11.156	9.72971		1.03619	4.2745	6.99377	1.08663	1.16466	4.77582	5.46787	1.68789	1.04981	1.11195		11.6991	9.96331	8.2817	12.7805	10.0805	7.60162	10.6684	8.91296	9.4561	13.3773		1.0921	6.19943	1.58482	4.5236	6.24076	1.11699	1.14188	7.13756	6.32219	4.49154		9.44286	8.26723	9.36723	5.88147	9.19681	9.09324
9.26934	8.85994	9.37119	9.08801	8.35963	10.7307	9.29877	9.37994	11.348	9.78751		1.03594	4.24988	6.98081	1.08553	1.16891	4.76251	5.45992	1.72095	1.04941	1.11041		10.2868	9.86062	8.26721	12.9946	10.0512	7.46399	10.6147	9.02847	9.48225	13.3668		1.09837	6.13498	1.59417	4.5454	6.24719	1.11236	1.12519	7.19273	6.37488	4.53782		9.62007	8.23354	9.3427	5.96595	9.20259	9.10544
9.14048	8.74205	9.43102	9.01894	8.52374	11.0171	9.31124	9.33739	11.1267	9.67101		1.03478	4.25492	7.02567	1.08427	1.16339	4.7419	5.45728	1.72571	1.05905	1.11214		11.1134	9.96938	8.27985	12.8583	10.1725	7.48625	10.688	9.00929	9.45185	13.6063		1.09166	6.13799	1.58604	4.52288	6.22104	1.11802	1.12461	7.13123	6.35803	4.52447		9.61445	8.15339	9.36259	5.86592	9.2375	9.09296
9.19354	8.78091	9.41092	9.02769	8.48661	10.6287	9.35862	9.25354	11.0601	9.72854		1.03329	4.27675	7.05496	1.08427	1.17945	4.74944	5.43547	1.7504	1.06216	1.11182		9.98206	10.0464	8.27435	12.722	10.1902	7.68271	10.6636	8.82107	9.40259	13.6466		1.09199	6.155	1.59805	4.53347	6.19836	1.11346	1.13279	7.14614	6.22267	4.5823		9.50606	8.17193	9.22304	5.88935	9.132	9.10501
9.27227	8.91798	9.41167	9.06025	8.76378	10.5428	9.34385	9.32435	11.1168	9.71637		1.03025	4.28342	7.03704	1.08527	1.1679	4.75185	5.47379	1.78034	1.0596	1.11324		10.4304	10.0452	8.26641	12.8687	10.0549	7.42747	10.6997	8.83538	9.38959	13.5813		1.10082	6.18143	1.58746	4.53407	6.18724	1.11603	1.10824	7.17408	6.24653	4.46884		9.53855	8.21271	9.28078	5.92233	9.19028	9.08719
9.2875	8.72416	9.47285	9.04212	8.32535	10.4244	9.27992	9.22962	11.0685	9.73573		1.03246	4.29861	7.05304	1.08378	1.16032	4.75463	5.39219	1.795	1.05649	1.11354		10.6508	9.96773	8.25202	12.8604	9.97998	7.07862	10.6566	8.91858	9.39131	13.6818		1.09579	6.19112	1.59401	4.5323	6.18609	1.11185	1.11854	7.16901	6.25135	4.57084		9.47589	8.19565	9.25909	5.91931	9.18398	9.0981
9.22899	8.88344	9.45551	9.002	8.91391	10.7586	9.29566	9.37219	11.0234	9.77953		1.02907	4.29645	7.0618	1.08404	1.14267	4.75397	5.4231	1.79788	1.05955	1.11316		11.6988	9.9397	8.26327	12.7558	10.0787	7.49248	10.7099	8.96501	9.4275	13.7364		1.099	6.16352	1.59312	4.52476	6.17037	1.11617	1.13215	7.16507	6.32615	4.55467		9.64748	8.16823	9.22255	6.00894	9.25839	9.12893
9.32735	8.82516	9.47533	9.04635	8.77149	10.6959	9.42885	9.18478	11.1296	9.75876		1.02949	4.27471	7.06702	1.08267	1.15456	4.76509	5.44908	1.80102	1.06051	1.10911		10.6408	9.77955	8.26716	12.7285	10.0805	7.37959	10.6864	8.85634	9.37101	13.684		1.09417	6.13314	1.60401	4.52473	6.17166	1.12023	1.10429	7.14548	6.22857	4.58052		9.70567	8.27919	9.22322	5.99924	9.16648	9.08716
9.12572	8.76967	9.37923	9.06607	8.43857	10.8661	9.4678	9.327	11.0694	9.75215		1.03341	4.26917	7.0436	1.08346	1.17209	4.76543	5.39764	1.7994	1.05621	1.11631		9.75075	9.9311	8.24584	12.7767	9.98813	7.37583	10.6928	8.81206	9.38472	13.7187		1.09539	6.12931	1.59682	4.56404	6.18129	1.11729	1.12136	7.1357	6.34743	4.61442		9.35681	8.17168	9.20075	5.86941	9.15218	9.11448
9.18768	8.88958	9.34558	9.0526	8.39183	10.7973	9.47499	9.34616	11.0856	9.72277		1.029	4.31977	7.0337	1.08467	1.1577	4.76916	5.43059	1.8296	1.05854	1.11652		10.583	9.95947	8.24505	12.6797	10.1975	7.33581	10.6936	8.91222	9.39307	13.8887		1.10195	6.16672	1.58579	4.54871	6.15072	1.12541	1.11956	7.14591	6.22422	4.68962		9.70129	8.21571	9.11209	5.9139	9.14264	9.12
9.31921	8.72436	9.39372	9.00355	8.55764	10.9936	9.43465	9.31486	11.1625	9.73047		1.03034	4.29911	7.05312	1.08317	1.15327	4.76908	5.35515	1.83604	1.06055	1.11713		10.0812	9.88467	8.25651	12.7351	10.1003	7.41833	10.6633	8.83731	9.3685	13.6773		1.10107	6.11409	1.59482	4.58964	6.11438	1.12363	1.10307	7.11131	6.31338	4.68011		9.47566	8.16907	9.16016	6.01202	9.14322	9.12682
9.25746	8.72222	9.30056	8.99149	8.70758	10.941	9.3191	9.29491	11.2726	9.75719		1.03055	4.29958	7.04045	1.08345	1.14112	4.76511	5.38552	1.81449	1.06322	1.11758		10.5734	9.95215	8.25471	12.8737	10.0494	7.55264	10.6988	8.96272	9.35786	13.6407		1.09527	6.11127	1.59752	4.6016	6.11963	1.11912	1.1123	7.1474	6.33758	4.64787		9.5518	8.0909	9.18736	5.91789	9.15953	9.12317
9.25977	8.76269	9.4729	9.0488	8.79111	10.4174	9.2883	9.30752	11.1514	9.67538		1.03107	4.3505	7.0301	1.08381	1.1582	4.78835	5.37768	1.84872	1.06243	1.11819		10.6647	10.0817	8.22635	12.7763	10.0789	7.3171	10.6899	8.88607	9.38588	13.9617		1.08994	6.10929	1.59838	4.61809	6.11431	1.12653	1.12852	7.22008	6.32696	4.6622		9.40504	8.2509	9.27246	5.97505	9.19585	9.10381
9.21156	8.89684	9.38359	8.99739	8.56874	10.6275	9.58876	9.27046	10.8662	9.7126		1.02956	4.29237	7.0225	1.08567	1.14173	4.79411	5.39164	1.8504	1.05572	1.11974		10.9882	9.9447	8.22911	12.7582	10.0323	7.64822	10.7251	9.06132	9.38107	13.6618		1.09886	6.06537	1.59787	4.5843	6.10061	1.12413	1.14032	7.16062	6.42852	4.59101		9.54843	8.2394	9.23696	5.80216	9.12339	9.13722
9.2249	8.84425	9.41115	9.05066	8.4074	10.7391	9.44502	9.30089	11.0307	9.7728		1.02937	4.30501	7.01134	1.08381	1.13943	4.78937	5.42327	1.84519	1.05906	1.1181		10.8844	9.78024	8.2735	12.9253	10.1952	7.42565	10.6758	8.88479	9.38708	13.4343		1.08957	6.09143	1.60151	4.64061	6.13275	1.12223	1.11737	7.24813	6.33857	4.70199		9.27529	8.12075	9.35621	5.90801	9.15388	9.12908
9.15198	8.82824	9.42071	9.04829	8.67114	10.7204	9.47126	9.35039	11.1993	9.75285		1.02825	4.28344	7.00255	1.08265	1.16516	4.77796	5.44434	1.82738	1.05813	1.11712		10.7587	9.89527	8.23409	12.8436	10.0286	7.37413	10.7412	8.86023	9.36335	13.5391		1.09397	6.07768	1.5924	4.68751	6.11916	1.12501	1.10633	7.24976	6.32006	4.71027		9.22705	8.27105	9.42164	5.89741	9.20689	9.12128
9.22168	8.93413	9.42372	9.05787	8.72019	10.332	9.59947	9.28409	10.9827	9.72351		1.03077	4.2972	6.99652	1.08136	1.16897	4.78059	5.4191	1.82209	1.05677	1.11911		10.1692	9.85001	8.22315	12.7393	10.1997	7.50217	10.689	8.89734	9.36622	13.5881		1.09035	6.09675	1.59382	4.67896	6.07589	1.12938	1.11359	7.22281	6.38181	4.67821		9.4342	8.16896	9.40068	5.9151	9.07507	9.07812
9.27091	8.78678	9.35686	9.01787	8.81376	10.8544	9.41927	9.29621	10.8532	9.74497		1.03045	4.35319	6.99346	1.08047	1.12602	4.79302	5.43667	1.8439	1.05988	1.11791		10.6456	9.90995	8.20288	12.7131	10.0747	7.44063	10.7524	8.83967	9.3818	13.4313		1.08902	6.1104	1.59893	4.6787	6.11879	1.12824	1.10779	7.20233	6.25905	4.7283		9.24417	8.20567	9.42965	5.70795	9.13858	9.05024
9.46401	8.86139	9.29553	9.01173	9.00764	10.6685	9.38652	9.33604	10.9183	9.72151		1.02856	4.30732	6.99453	1.07936	1.14462	4.79007	5.44927	1.85487	1.05817	1.11977		10.2081	9.90105	8.21261	12.877	10.1746	7.68487	10.7012	8.90681	9.32859	13.5103		1.09032	6.12595	1.59665	4.71306	6.12447	1.13212	1.11967	7.24777	6.37329	4.59331		9.28659	8.23582	9.41701	5.8674	9.15691	9.02764
9.29049	8.77475	9.43075	9.02697	8.58707	10.6591	9.42418	9.28777	11.0818	9.78216		1.03083	4.33122	6.99869	1.0796	1.15867	4.79115	5.41897	1.83805	1.05767	1.11667		9.05134	9.86158	8.24353	12.783	10.2395	7.50977	10.7508	8.82978	9.34291	13.4659		1.09043	6.17591	1.60229	4.69854	6.14592	1.13354	1.11989	7.23378	6.34279	4.69911		9.39493	8.13365	9.41188	5.83183	9.16082	9.05469
9.28124	8.85961	9.36557	8.97073	8.72463	11.0507	9.70462	9.32267	11.0795	9.77874		1.03203	4.34721	6.99044	1.07916	1.14335	4.77898	5.40916	1.85518	1.05633	1.11474		10.2941	9.96172	8.22126	12.7904	10.2391	7.70087	10.7123	8.97794	9.34036	13.5845		1.09323	6.206	1.5986	4.71876	6.16516	1.12848	1.11073	7.23729	6.27015	4.6742		9.82398	8.11229	9.39148	5.79524	9.11166	9.04972
9.29228	8.76336	9.39726	9.0809	8.65167	10.7526	9.41121	9.3563	10.8354	9.71101		1.02783	4.34696	6.99678	1.07824	1.16409	4.78975	5.42098	1.82486	1.05552	1.11028		10.5559	9.94844	8.24298	12.8198	10.2197	7.57373	10.7418	8.97574	9.31723	13.6209		1.09394	6.17251	1.60768	4.78038	6.18681	1.1264	1.09961	7.20688	6.25216	4.66523		9.98082	8.16168	9.39013	5.88364	9.14308	9.05485
9.33298	8.79785	9.36054	8.96889	8.81381	10.6109	9.54134	9.33375	11.0458	9.67592		1.02685	4.35595	6.98823	1.079	1.18363	4.79334	5.45195	1.83413	1.0588	1.10852		10.5606	9.94576	8.24394	12.7689	10.2352	7.72807	10.7208	9.01376	9.26733	13.4508		1.0894	6.20904	1.60145	4.75687	6.2268	1.12564	1.11919	7.25187	6.29481	4.66149		9.58945	8.28232	9.332	5.8733	9.0981	9.01267
9.32499	8.80049	9.35916	8.99106	8.52668	10.9885	9.48432	9.32298	11.1447	9.72332		1.02765	4.30665	6.9752	1.07815	1.17574	4.79535	5.39745	1.86329	1.06085	1.10495		10.315	10.0069	8.25103	12.8405	10.2599	7.44175	10.7268	8.86135	9.27923	13.5279		1.09564	6.19468	1.60407	4.77049	6.23814	1.12951	1.1188	7.14449	6.25733	4.67437		9.96798	8.07545	9.2875	5.83238	9.09611	9.04602
9.40403	8.91713	9.25999	8.99485	8.63879	10.7766	9.55879	9.24014	11.0304	9.68422		1.02768	4.31051	6.96563	1.07878	1.13589	4.79364	5.4361	1.84638	1.06192	1.10757		9.12135	9.99073	8.24705	12.9408	10.072	7.68572	10.7082	8.88473	9.28243	13.6484		1.09318	6.14207	1.60311	4.78763	6.25302	1.12578	1.13155	7.22531	6.14877	4.62018		9.77398	8.09388	9.3154	5.8905	9.06445	9.02609
9.36514	8.74886	9.38453	9.07132	8.66785	10.7688	9.44092	9.27455	11.128	9.76094		1.02783	4.30173	6.96364	1.07889	1.16793	4.78685	5.43182	1.85665	1.05569	1.10512		10.7605	9.9852	8.22009	12.8138	10.0794	7.558	10.7131	8.93245	9.2501	13.5053		1.09864	6.10542	1.60391	4.76601	6.23168	1.12657	1.12157	7.30196	6.25039	4.62657		9.43551	8.1742	9.34091	5.8715	9.02064	9.00826
9.50036	8.74082	9.32953	8.95904	8.69455	10.8106	9.35814	9.20471	10.8744	9.67096		1.02962	4.30865	6.97518	1.0782	1.15974	4.78926	5.45993	1.82345	1.05465	1.10311		11.0781	9.98328	8.24341	12.7436	10.0706	7.32042	10.7393	8.79526	9.27665	13.3567		1.10223	6.08154	1.60509	4.7231	6.22682	1.12548	1.12113	7.26385	6.15015	4.5305		9.61592	8.14559	9.33573	5.90072	9.10174	9.02824
9.24982	8.77036	9.40205	8.93988	8.51472	10.8164	9.25463	9.27695	11.0507	9.75806		1.03215	4.36459	6.96084	1.07793	1.1741	4.79123	5.43717	1.84994	1.05667	1.10069		10.3435	9.90222	8.24161	12.8605	10.2572	7.47803	10.7193	8.93506	9.27665	13.2391		1.09874	6.04762	1.60149	4.69152	6.21893	1.13063	1.1054	7.22545	6.14381	4.49861		9.65554	8.26808	9.35151	5.81725	9.1243	9.02999
9.24481	8.84326	9.27964	9.03507	8.8342	10.6866	9.41492	9.26776	10.8962	9.74595		1.02986	4.3462	6.96332	1.07679	1.15311	4.7841	5.44567	1.84939	1.06189	1.09995		9.34821	9.88889	8.20421	12.9321	9.91526	7.59751	10.7357	8.91451	9.28178	13.17		1.09055	6.04479	1.60973	4.68182	6.21829	1.13125	1.11336	7.28319	6.10311	4.5308		9.34781	8.16404	9.34488	5.84565	9.07181	9.00456
9.25406	8.80063	9.27189	9.04934	8.73386	10.7818	9.56723	9.2016	11.1596	9.74752		1.0283	4.31938	6.96872	1.07527	1.17632	4.78089	5.43488	1.82949	1.05729	1.10017		10.1371	9.79162	8.20506	12.8853	9.89991	7.25357	10.752	8.95228	9.2422	13.3346		1.09131	6.08212	1.60086	4.66898	6.18863	1.13371	1.0951	7.28476	6.31879	4.48411		9.47817	8.24256	9.32384	5.88274	9.09749	9.00525
9.25231	8.7491	9.20979	9.03726	8.786	10.707	9.45636	9.22629	11.06	9.7599		1.02851	4.34025	6.97126	1.07678	1.13867	4.79056	5.47317	1.83745	1.06004	1.10282		9.14865	9.94427	8.22838	12.9968	9.94211	7.39035	10.754	9.00695	9.26556	13.4248		1.09282	6.07547	1.61597	4.662	6.18283	1.12793	1.10485	7.21886	6.46229	4.47479		9.79024	8.21199	9.33487	5.8066	9.04728	9.02676
9.32922	8.88579	9.28464	8.97925	8.88205	10.4868	9.60014	9.24606	11.1424	9.7178		1.02348	4.36257	6.96278	1.07729	1.16007	4.77413	5.41858	1.86784	1.05876	1.10875		9.64394	9.82992	8.2051	12.8976	10.0509	7.49049	10.7043	8.78715	9.26249	13.5822		1.09619	6.0895	1.60697	4.62552	6.18826	1.13004	1.11752	7.3276	6.49124	4.48236		9.62106	8.20096	9.36619	5.91528	9.02853	9.03112
9.2218	8.78376	9.27528	8.96903	8.85628	10.3556	9.62415	9.23711	11.025	9.66923		1.0288	4.3427	6.95767	1.07725	1.16472	4.75822	5.38165	1.84239	1.06047	1.10888		9.81425	9.77838	8.22693	12.9559	9.80435	7.60881	10.7178	8.85637	9.29574	13.4383		1.10001	6.05391	1.60627	4.57711	6.20323	1.12577	1.12669	7.2592	6.50065	4.45018		9.47982	8.12178	9.35371	5.80389	9.08616	9.02723
9.39367	8.90828	9.27595	8.96523	8.91699	10.5967	9.65105	9.26429	11.0979	9.69748		1.02618	4.37234	6.9544	1.0777	1.15099	4.76937	5.39467	1.83742	1.05397	1.10699		10.2628	9.86961	8.2158	12.9887	9.95247	7.61505	10.6362	8.84738	9.20731	13.2694		1.09682	6.06051	1.61458	4.5682	6.20818	1.12662	1.12961	7.20768	6.53017	4.46375		9.64614	8.18079	9.35364	5.78855	9.09316	9.03335
9.41814	8.77424	9.2951	9.03795	8.50364	11.0221	9.71714	9.18776	11.1721	9.73617		1.0285	4.31899	6.94983	1.07749	1.16095	4.77382	5.43833	1.84122	1.05493	1.10667		9.79342	9.75932	8.19627	12.9657	10.0568	7.9651	10.6778	8.92537	9.23809	13.2676		1.08934	6.0452	1.61105	4.54178	6.2308	1.13069	1.10794	7.22628	6.53457	4.45407		9.70252	8.17873	9.36074	5.59948	9.08923	9.08304
9.29074	8.92719	9.29289	9.00691	8.69825	10.9087	9.70516	9.27877	10.9276	9.74989		1.02357	4.35564	6.95423	1.07778	1.15291	4.79058	5.40876	1.8443	1.05878	1.10788		10.6084	9.76417	8.18894	12.8605	10.0669	7.51025	10.6357	8.78784	9.21444	13.2451		1.0934	6.0664	1.6039	4.55183	6.2278	1.12908	1.10778	7.21937	6.51701	4.42483		9.65292	8.16994	9.33649	5.74048	9.08132	9.10637
9.4049	8.8003	9.32858	8.9908	8.89324	10.6779	9.53299	9.2663	11.0303	9.6768		1.02853	4.37032	6.944	1.07805	1.16039	4.78381	5.35712	1.85667	1.0618	1.10818		10.7628	9.61139	8.19489	12.7968	10.0126	7.5656	10.665	8.90635	9.25894	13.0337		1.09395	6.04527	1.61106	4.50345	6.21298	1.12305	1.1191	7.183	6.60687	4.45665		9.73002	8.16965	9.33554	5.76439	9.12601	9.1169
9.29659	8.98103	9.24468	8.96566	8.75156	11.1337	9.54521	9.21581	11.0488	9.66002		1.02855	4.35574	6.9326	1.07732	1.15224	4.78026	5.48767	1.84032	1.06063	1.10637		10.5754	9.83891	8.2195	12.731	10.1052	7.53465	10.6304	8.83977	9.2274	13.0388		1.09488	6.06681	1.60932	4.51779	6.21784	1.13166	1.08783	7.16593	6.48401	4.47265		9.96457	8.18501	9.33825	5.72358	9.07983	9.11224
9.39297	8.8566	9.25977	9.039	8.76637	10.9172	9.50749	9.24265	11.03	9.66657		1.0271	4.34054	6.92803	1.07621	1.14364	4.7812	5.45142	1.85321	1.06008	1.11411		9.81934	10.0351	8.23218	12.672	9.87815	8.03331	10.6428	8.81167	9.18857	13.1469		1.09159	6.06302	1.61471	4.50469	6.24979	1.13312	1.12295	7.18886	6.45485	4.44352		9.55728	8.26338	9.32631	5.79505	9.11385	9.06213
9.43424	8.87409	9.2419	8.97317	8.87386	10.942	9.48017	9.24506	11.3517	9.69166		1.02373	4.36905	6.94545	1.07649	1.15422	4.77687	5.4158	1.83961	1.05852	1.1099		9.1342	9.90399	8.18918	12.6407	9.92331	7.71524	10.6025	8.76981	9.18285	12.8583		1.09776	6.0691	1.60958	4.51886	6.28453	1.13315	1.14242	7.13173	6.44546	4.46878		9.78503	8.10718	9.29591	5.65162	9.08891	9.07304
9.27336	8.88651	9.31283	8.9212	8.61349	10.8741	9.37164	9.19656	11.0542	9.68916		1.02685	4.36084	6.93535	1.07701	1.14883	4.77682	5.47206	1.85427	1.05688	1.10799		10.2202	9.92643	8.23249	12.4469	10.0536	7.72774	10.5837	8.90452	9.19223	12.7905		1.09474	6.06412	1.61723	4.46754	6.32311	1.1365	1.10426	7.06665	6.44785	4.57493		9.62694	8.17058	9.30503	5.72798	9.10716	9.07145
9.42039	8.80424	9.30671	8.9734	8.93464	11.0306	9.52667	9.23986	10.9911	9.67692		1.02647	4.37719	6.96298	1.07805	1.15172	4.77623	5.39376	1.83363	1.06078	1.1112		10.3094	9.81938	8.21756	12.4262	9.89321	7.88544	10.6043	8.8058	9.16582	12.9049		1.09198	6.15776	1.61463	4.49573	6.38459	1.13529	1.1331	7.12991	6.27629	4.6514		9.66474	8.17655	9.35473	5.79743	9.10329	9.02848
9.25075	8.76848	9.32121	8.91236	8.94446	10.517	9.2152	9.24498	11.1766	9.71882		1.02558	4.37967	6.93667	1.07686	1.15325	4.79254	5.37506	1.82288	1.05677	1.11186		10.5435	9.88074	8.20895	12.4537	9.99547	7.80403	10.5379	8.85948	9.18529	12.7696		1.09278	6.12297	1.60751	4.49641	6.3664	1.13345	1.13186	7.17787	6.1861	4.58453		9.74546	8.13556	9.33472	5.73283	9.06272	9.04713
9.17038	8.88614	9.21403	8.87381	8.67663	10.8664	9.20823	9.26588	11.0733	9.73697		1.02346	4.35462	6.95803	1.07756	1.13449	4.7794	5.46195	1.84692	1.05549	1.10843		10.7692	9.67736	8.20789	12.2906	9.9009	8.0021	10.6036	8.8712	9.16799	12.8248		1.09402	6.13014	1.61625	4.48298	6.3608	1.13166	1.0989	7.12608	6.35509	4.59553		9.33445	8.18988	9.35177	5.76964	9.07909	9.01373
9.22624	8.79833	9.18607	8.90638	8.57054	10.6707	9.38218	9.2568	10.9955	9.7518		1.02893	4.35091	6.95624	1.07898	1.15055	4.74146	5.3964	1.8243	1.05508	1.10712		11.2209	9.86224	8.19513	12.2143	10.0587	7.95397	10.57	8.88184	9.13767	12.8488		1.08972	6.17891	1.60747	4.51016	6.41249	1.13115	1.12841	7.04913	6.21729	4.50846		9.644	8.12296	9.35942	5.76828	9.04502	9.01296
9.28645	8.81854	9.22009	8.98362	9.10548	10.2587	9.45111	9.20622	11.0465	9.69006		1.02898	4.36901	6.93497	1.07952	1.14723	4.75774	5.42335	1.84448	1.0568	1.10959		10.4019	9.78647	8.23354	12.1527	9.91902	7.85972	10.5961	8.8098	9.12247	12.8272		1.08827	6.17856	1.60881	4.48352	6.41903	1.13221	1.12325	7.12647	6.27819	4.53385		9.54743	8.19263	9.34993	5.70613	9.02886	8.98626
9.31705	8.88678	9.19259	8.96201	8.52264	10.4413	9.38887	9.19969	11.0579	9.72045		1.02392	4.34275	6.93636	1.0795	1.15487	4.76738	5.38446	1.8599	1.05659	1.10608		10.5169	9.85321	8.20926	12.089	9.90115	7.41168	10.5678	8.73143	9.17166	13.0987		1.0922	6.18027	1.61357	4.52824	6.38771	1.13313	1.09573	7.09697	6.25488	4.49284		9.55261	8.21003	9.35488	5.77478	9.05703	8.99197
9.24328	8.88072	9.17748	8.85589	9.01371	10.6112	9.49625	9.29403	11.0259	9.7217		1.0251	4.34848	6.93326	1.07942	1.1333	4.78398	5.45524	1.84654	1.05029	1.10571		10.1424	9.88049	8.19028	12.0541	10.0893	7.50756	10.5869	8.89787	9.17285	13.3745		1.09575	6.15508	1.61716	4.51884	6.41834	1.12468	1.12244	7.03275	6.1276	4.51059		9.58746	8.14429	9.37305	5.75436	9.07432	8.97407
9.10896	8.93579	9.3175	8.84902	8.60132	10.45	9.60692	9.28763	11.1537	9.68883		1.02597	4.34294	6.93169	1.07998	1.13922	4.77308	5.41576	1.83792	1.05164	1.10338		10.4596	9.90918	8.18736	11.9978	9.86485	7.79444	10.5762	8.864	9.13013	13.4671		1.08823	6.17414	1.61956	4.50363	6.40017	1.13253	1.11208	7.05869	6.15915	4.47566		9.5314	8.11454	9.38284	5.73175	8.98967	8.96359
9.29728	8.75355	9.13655	8.9513	8.56887	10.8531	9.49459	9.26882	11.1151	9.65477		1.02357	4.36329	6.93779	1.08096	1.1442	4.7635	5.50289	1.84097	1.0567	1.1033		8.97368	9.83332	8.24059	11.918	10.0185	7.68443	10.5762	8.77611	9.14072	13.4568		1.09863	6.11664	1.61592	4.52412	6.38748	1.13349	1.0905	7.07697	6.14525	4.45304		9.67077	8.23242	9.35995	5.69975	9.02314	8.95773
9.2606	8.80892	9.09871	8.95603	8.57706	10.7983	9.63214	9.215	11.1638	9.69946		1.02242	4.35458	6.93715	1.08107	1.15128	4.77997	5.45768	1.8453	1.055	1.10149		10.4533	9.7004	8.17957	11.8899	10.0256	7.50734	10.5891	8.63933	9.16138	13.6621		1.09503	6.1142	1.61113	4.52145	6.34924	1.13815	1.10233	7.05393	6.26883	4.48518		9.46669	8.22249	9.35837	5.76307	9.05008	8.9458
9.23028	8.92402	9.26643	9.01606	8.74604	10.7622	9.50489	9.31409	11.1188	9.69541		1.02569	4.36015	6.9403	1.08238	1.14544	4.75895	5.45504	1.83034	1.05911	1.10298		9.65086	9.70285	8.2128	11.9731	10.1367	7.73511	10.5669	8.769	9.0794	13.5454		1.09132	6.14071	1.62444	4.56522	6.34276	1.14277	1.09493	7.08745	6.26014	4.46686		9.58124	8.1035	9.38656	5.8344	9.00353	8.94366
9.28712	8.91461	9.21286	8.88671	8.85883	10.4849	9.37228	9.23141	11.2225	9.70677		1.02617	4.37433	6.94877	1.08154	1.14703	4.75965	5.42562	1.83893	1.0567	1.10167		10.6078	9.82341	8.21187	12.0299	10.0421	7.64453	10.5965	8.89356	9.15192	13.4793		1.09579	6.09528	1.61003	4.53075	6.33371	1.13946	1.12031	7.09963	6.26909	4.43885		9.77346	8.05785	9.41029	5.66988	9.04576	8.93922
9.29809	8.86432	9.10037	8.95871	8.81179	10.6959	9.34543	9.24372	11.1212	9.70092		1.02687	4.38768	6.96467	1.08093	1.14498	4.77144	5.39497	1.83491	1.0609	1.10324		9.75642	9.80936	8.22357	11.9757	10.0381	7.71598	10.5292	8.88983	9.10011	13.3523		1.09516	6.17374	1.61429	4.52957	6.33671	1.13908	1.08951	7.04588	6.35006	4.44162		9.60413	8.20448	9.38143	5.76341	8.942	8.94325
9.1923	8.89954	9.23964	8.91751	8.92243	10.6982	9.53759	9.18223	11.1754	9.69631		1.02805	4.37972	6.95032	1.08153	1.12674	4.78956	5.34182	1.8369	1.05859	1.10268		10.4044	9.77324	8.18411	12.0479	10.0923	7.75833	10.6023	9.00208	9.08758	13.4983		1.09444	6.15547	1.6282	4.574	6.31631	1.13698	1.14115	7.01101	6.32137	4.3514		9.68493	8.16775	9.3549	5.84111	8.97726	8.94618
9.16801	8.80346	9.18845	8.84719	8.60864	10.7071	9.54418	9.33928	10.9419	9.66551		1.0221	4.37381	6.94574	1.08082	1.14599	4.77165	5.41466	1.83492	1.05766	1.10558		11.1125	9.67156	8.20799	11.9894	10.0804	7.71158	10.5872	8.78128	9.13227	13.4577		1.0954	6.19584	1.62912	4.56454	6.31577	1.14231	1.08067	7.07471	6.45026	4.41661		9.58529	8.20623	9.31455	5.70127	9.04584	8.91899
9.12542	8.80352	9.23611	8.93036	8.71873	10.7302	9.36814	9.31931	11.1717	9.62478		1.02364	4.38715	6.94634	1.07936	1.13495	4.76682	5.38203	1.8553	1.06282	1.10532		10.4631	9.59389	8.19252	11.9274	10.0943	7.68336	10.58	8.65979	9.08501	13.4628		1.09394	6.20348	1.62546	4.55325	6.32728	1.14361	1.10256	7.03504	6.34164	4.45447		9.3641	8.10464	9.28469	5.66474	8.98226	8.93562
9.58228	8.78609	9.156	8.98918	8.53656	10.5676	9.40724	9.186	11.1503	9.68994		1.02156	4.3782	6.95007	1.08001	1.16118	4.77558	5.43008	1.8334	1.05672	1.10179		10.3076	9.72653	8.17438	12.0287	10.0956	8.01078	10.5721	8.99519	9.09405	13.7297		1.09946	6.17877	1.63124	4.51402	6.3205	1.13618	1.12472	6.97431	6.38573	4.46811		9.76362	8.19098	9.24361	5.57647	9.02481	8.95938
9.35167	8.87044	9.18251	8.87947	8.67535	11.0336	9.58462	9.27427	11.0853	9.6501		1.01934	4.42728	6.9569	1.08013	1.15528	4.77494	5.34262	1.83108	1.05514	1.10278		9.51199	9.71	8.18871	12.1028	10.0087	7.88536	10.6026	8.75442	9.0768	13.7034		1.09213	6.12615	1.62025	4.5592	6.27853	1.14194	1.10015	7.01231	6.45807	4.4021		9.90833	8.17634	9.27371	5.6805	9.01671	8.92821
9.18093	8.73562	9.19098	8.9753	9.02172	10.4008	9.48277	9.2486	11.1264	9.69208		1.02483	4.41929	6.96248	1.0792	1.15468	4.78051	5.33612	1.85088	1.05268	1.10168		10.143	9.81969	8.18035	12.1276	10.2357	7.83347	10.6043	8.77125	9.07678	13.4697		1.09158	6.11943	1.6378	4.52355	6.28147	1.13931	1.10556	6.97456	6.49997	4.3831		9.95077	8.12745	9.2635	5.73859	9.00231	8.94425
9.00626	8.80065	9.13928	8.95276	8.86047	10.4432	9.50833	9.28341	11.2113	9.67314		1.02221	4.42215	6.95718	1.07798	1.14536	4.76956	5.4304	1.83642	1.0557	1.10138		10.1624	9.71291	8.19487	12.1672	10.126	7.84252	10.6038	8.80419	9.04151	13.5161		1.0906	6.09846	1.63243	4.53601	6.28802	1.14259	1	7.05072	6.45624	4.44046		9.74152	8.15374	9.2197	5.73201	9.05012	8.95312
9.41765	8.75958	9.13219	8.93281	8.70234	10.3451	9.51203	9.25997	10.908	9.67705		1.01963	4.41503	6.95609	1.07675	1.14205	4.79249	5.41541	1.84314	1.05702	1.0977		9.08304	9.79339	8.20976	12.4049	10.0396	8.06278	10.6194	8.7615	9.09386	13.6933		1.09539	6.13733	1.62525	4.52919	6.24014	1.13546	1.09119	7.02129	6.38006	4.39932		9.72254	8.14718	9.18047	5.75406	8.98822	8.9794
9.28225	8.90293	9.23353	8.96135	8.83361	10.7347	9.56589	9.24171	11.0435	9.67155		1.02465	4.38011	6.9578	1.07732	1.14352	4.80894	5.47682	1.84777	1.05952	1.09602		10.4846	9.7727	8.1639	12.4115	10.1919	7.96262	10.5648	8.84231	9.0519	13.6356		1.08757	6.03218	1.63192	4.56095	6.25838	1.14926	1.06477	7.01899	6.41584	4.4561		9.9101	8.06932	9.15405	5.64743	8.94239	9.02618
9.22852	8.6998	9.24031	8.91803	8.95909	10.4019	9.60374	9.1625	10.8798	9.67618		1.02107	4.39109	6.98063	1.07563	1.12738	4.80659	5.4536	1.83563	1.05692	1.10106		10.8425	9.7923	8.19479	12.3543	10.1398	7.60673	10.6666	8.67197	9.08028	13.6228		1.09054	6.06158	1.62656	4.51809	6.23246	1.14433	1.10588	6.98913	6.39577	4.46435		9.89815	8.12079	9.21919	5.64963	8.99859	9.02389
9.30006	8.92209	9.12761	8.86442	8.89892	10.3249	9.34417	9.16836	11.0503	9.65933		1.0221	4.37505	6.95083	1.07599	1.13818	4.80525	5.50219	1.84032	1.05819	1.10102		10.4718	9.84275	8.19308	12.5298	10.115	7.77502	10.5818	8.86344	9.04375	13.7154		1.0873	6.04803	1.63267	4.5504	6.20835	1.13567	1.12485	6.95747	6.43144	4.49603		9.90694	8.17411	9.16252	5.61732	8.99052	8.99221
9.15806	8.80903	9.16498	8.93103	8.75689	10.7743	9.42214	9.22354	11.1325	9.7037		1.02151	4.40405	6.96726	1.07598	1.13718	4.80224	5.47223	1.82941	1.05616	1.10361		9.96751	9.69622	8.17779	12.5353	10.1523	7.52582	10.6609	8.9027	9.03628	13.5489		1.09682	6.02807	1.62716	4.55077	6.15861	1.13863	1.14437	7.06404	6.39629	4.56764		9.91369	8.17611	9.17534	5.73928	8.95151	9.04337
9.24484	8.79795	9.22968	8.88436	8.97406	10.4862	9.46333	9.31349	11.1479	9.67177		1.02155	4.46281	6.98112	1.07748	1.15484	4.79709	5.39794	1.84013	1.05512	1.10475		10.3004	9.74032	8.15512	12.5795	10.1885	7.91282	10.6127	8.81396	9.09126	13.367		1.08877	6.06991	1.62751	4.60223	6.17875	1.13797	1.12807	7.00179	6.31884	4.67313		9.92018	8.1243	9.17563	5.72356	9.02282	8.9988
9.13286	8.92712	9.20395	8.95378	8.62269	10.7221	9.40911	9.20013	11.1143	9.64546		1.01988	4.42632	6.97479	1.07712	1.14318	4.79599	5.43196	1.83218	1.05592	1.10688		8.9685	9.69875	8.17041	12.7328	10.2225	7.53271	10.6512	8.698	9.05356	13.4557		1.09208	6.06865	1.63037	4.61387	6.19256	1.13773	1.13002	6.98592	6.47184	4.6357		9.89638	8.14622	9.11388	5.58295	8.95157	8.98956
9.30576	8.87997	9.29311	8.9337	8.84484	10.6408	9.35821	9.22011	11.0672	9.66336		1.02181	4.44993	6.99023	1.07607	1.15	4.79222	5.47487	1.84669	1.05962	1.10211		10.3645	9.76654	8.16989	12.9578	10.3345	7.59744	10.6155	8.80019	9.05731	13.2452		1.09333	6.07106	1.62563	4.65545	6.17068	1.15129	1.12566	7.05447	6.42769	4.68749		9.95242	8.13437	9.16329	5.58491	9.00659	8.97265
9.08492	8.93036	9.21537	8.91342	8.74255	10.8124	9.44892	9.24626	11.0591	9.69693		1.02025	4.44601	6.975	1.07496	1.16365	4.80183	5.41369	1.83227	1.05839	1.09976		10.2597	9.68847	8.17745	12.9121	10.0947	7.62278	10.6405	8.67919	9.04265	13.0023		1.08991	6.06182	1.62739	4.6849	6.16933	1.14989	1.16458	7.04568	6.30123	4.61608		9.96861	8.20298	9.14543	5.66162	8.94929	8.9873
9.18824	8.90865	9.21367	8.82973	8.74311	10.4441	9.32898	9.30594	11.2606	9.67007		1.02024	4.40847	6.9898	1.07583	1.12679	4.79544	5.58881	1.83861	1.05866	1.09619		9.26453	9.75153	8.1712	12.922	10.0389	7.97927	10.6114	8.88649	9.041	12.9198		1.09182	6.09884	1.62361	4.66463	6.17969	1.14562	1.11463	6.98577	6.38861	4.6173		10.1158	8.13914	9.18035	5.66652	8.96935	8.94953
9.06115	8.87354	9.04061	8.94086	8.5731	10.3887	9.17844	9.23879	11.1317	9.64251		1.019	4.39843	6.98012	1.07713	1.13936	4.80711	5.51526	1.85539	1.06162	1.09281		9.18375	9.83962	8.14433	12.9438	9.94813	7.60181	10.5992	8.78804	9.00208	12.7673		1.09566	6.05151	1.63222	4.66897	6.1212	1.14792	1.1208	6.99732	6.22772	4.58917		9.90967	8.11352	9.24657	5.60313	8.95245	8.91788
9.03606	8.76051	9.20473	8.90222	8.73155	10.7507	9.28826	9.14739	11.1722	9.65093		1.02411	4.40807	6.99077	1.07635	1.14755	4.80437	5.40715	1.84112	1.0559	1.08702		9.90323	9.71158	8.14572	12.9133	9.9392	8.05508	10.6289	8.77679	8.99553	12.6555		1.09501	6.0125	1.62283	4.6961	6.11475	1.14455	1.13144	7.0415	6.27823	4.5777		9.9959	8.04841	9.23923	5.58053	8.89114	8.90422
9.09187	8.83773	9.09983	8.91319	8.91024	10.6329	9.39099	9.23839	11.1451	9.69936		1.02256	4.45498	6.99243	1.07522	1.1341	4.82242	5.47587	1.84296	1.06151	1.08631		10.8464	9.68213	8.16132	12.9014	10.1502	7.89102	10.5795	8.8205	8.99775	12.7757		1.0925	6.01764	1.61794	4.6538	6.13831	1.14549	1.12311	6.98461	6.28916	4.47969		9.98663	8.13583	9.27876	5.70257	8.92188	8.88762
9.21053	8.86616	9.11776	8.92925	8.90011	10.6637	9.18826	9.18788	11.2267	9.65315		1.02003	4.42731	6.98853	1.07359	1.13991	4.82442	5.53259	1.84804	1.05547	1.08828		10.9854	9.57559	8.17936	12.899	9.95693	7.71317	10.5901	8.75709	8.99029	12.7831		1.08938	6.02273	1.62278	4.66548	6.09008	1.1384	1.14527	7.04448	6.34878	4.58835		9.83786	8.20285	9.26835	5.71606	8.86599	8.88957
9.23644	8.77648	9.10904	8.92482	9.10936	10.388	9.29158	9.21893	11.3954	9.63814		1.02052	4.44833	6.99037	1.07489	1.14562	4.81997	5.45854	1.84347	1.0578	1.08834		10.2504	9.74505	8.15692	12.7608	10.0716	7.98065	10.5941	8.73288	8.98343	12.5666		1.09409	6.04967	1.61114	4.68614	6.07101	1.14832	1.14586	6.98756	6.35065	4.45401		10.0804	8.09632	9.25734	5.75387	8.87996	8.87848
9.01243	8.84006	9.08549	8.90655	8.69044	10.4951	9.34621	9.2304	11.1229	9.63748		1.02176	4.38642	6.98594	1.07455	1.14058	4.80532	5.5302	1.83302	1.0572	1.08853		9.65185	9.86609	8.16339	12.88	9.99867	7.92111	10.6131	8.80871	8.96762	12.6235		1.09037	6.04511	1.62088	4.69731	6.13564	1.15118	1.11957	7.01784	6.46224	4.35702		9.87568	8.05758	9.24937	5.59393	8.80613	8.88848
9.20438	8.80286	9.18864	8.92405	8.97943	10.6308	9.55776	9.19054	11.2539	9.66944		1.01963	4.40555	6.99042	1.07287	1.15148	4.8	5.57114	1.83885	1.05793	1.09149		10.1879	9.68641	8.15104	12.8422	9.89551	7.87233	10.5598	8.66867	8.99616	12.7325		1.09419	6.0664	1.62734	4.69368	6.17203	1.16362	1.13326	7.08615	6.46162	4.42409		10.1981	8.1334	9.1928	5.65238	8.91627	8.89148
9.14085	8.77807	9.141	8.91075	8.5688	10.6686	9.30407	9.24407	11.0245	9.61843		1.01816	4.42793	6.97872	1.07468	1.14643	4.81775	5.571	1.83676	1.05501	1.09221		10.7835	9.56052	8.13646	12.7492	9.97622	7.60878	10.6097	8.86909	8.96571	12.9206		1.09364	6.07401	1.62566	4.70353	6.12743	1.15532	1.10871	7.07485	6.36764	4.47449		10.0882	8.21965	9.19912	5.49522	8.87289	8.87396
9.19509	8.84235	9.0391	8.9206	8.98303	10.8116	9.50528	9.18598	10.9895	9.63885		1.01827	4.43976	6.98473	1.07436	1.14387	4.82434	5.52314	1.83504	1.05468	1.09143		10.9192	9.84666	8.11121	12.8128	10.0709	7.64105	10.6001	8.7234	8.95797	13.1454		1.0868	6.05754	1.63242	4.66555	6.15732	1.14204	1.11435	7.09421	6.48785	4.4914		10.0424	8.23071	9.2091	5.62014	8.89453	8.89869
8.99913	8.90618	9.17582	8.88659	8.6783	10.6443	9.61541	9.30166	11.0791	9.67554		1.01585	4.43043	6.98697	1.07377	1.15982	4.83425	5.57387	1.8429	1.05616	1.09353		10.8462	9.81512	8.15836	12.8045	9.92886	7.65763	10.5211	8.82985	8.97165	13.416		1.08785	6.075	1.62676	4.67974	6.22316	1.13342	1.08848	7.05724	6.50802	4.46794		9.79466	8.1028	9.18356	5.61463	8.93722	8.89897
9.42434	8.89114	9.18246	8.91459	8.71891	10.6661	9.52996	9.24256	11.202	9.69259		1.01839	4.41441	6.99821	1.07491	1.13758	4.83598	5.42665	1.83274	1.0578	1.08898		9.89189	9.73304	8.16411	12.8221	10.0145	7.64255	10.6348	8.80105	8.95159	13.5117		1.09186	6.06024	1.6299	4.65659	6.23319	1.13899	1.12726	7.10344	6.45438	4.54014		10.2043	8.12779	9.1895	5.58027	8.94799	8.92343
9.07901	8.73093	9.23226	8.88392	8.6702	11.12	9.73846	9.21154	11.0497	9.60619		1.02084	4.43027	7.00911	1.07414	1.14177	4.82359	5.35647	1.85862	1.05727	1.08907		10.3113	9.65124	8.14719	12.6714	9.94593	7.92886	10.5599	8.81935	8.96899	13.6213		1.08995	6.15459	1.61836	4.61768	6.32146	1.12752	1.10523	7.03577	6.11059	4.45183		10.2696	8.08266	9.20782	5.44172	8.88724	8.90076
9.13099	8.84575	9.02792	8.87063	8.71706	10.6849	9.67857	9.27727	10.9939	9.65858		1.01983	4.40651	6.99671	1.07362	1.15443	4.85107	5.50867	1.8579	1.06084	1.08856		10.1812	9.65563	8.18237	12.6392	9.8855	7.66586	10.6017	8.85551	8.96372	13.7474		1.08216	6.10529	1.62564	4.66291	6.42166	1.10522	1.13177	6.99998	6.58767	4.43166		10.233	8.18238	9.24422	5.65734	8.89228	8.8974
9.34213	8.80317	9.13475	8.84659	8.68487	10.4738	9.64531	9.21908	10.9831	9.68948		1.01897	4.42343	7.00246	1.07431	1.1472	4.85037	5.53958	1.86164	1.05756	1.08668		10.8772	9.64026	8.15238	12.6109	10.0462	7.77499	10.5827	8.82772	8.96666	13.6145		1.0878	6.10862	1.62614	4.6785	6.45652	1.10937	1.1147	7.07139	6.47397	4.48342		10.1321	8.12038	9.19086	5.52381	8.98595	8.91218
9.17834	8.74015	9.10248	8.88551	8.87239	10.9128	9.79495	9.24769	11.1559	9.58895		1.0181	4.42267	7.00755	1.07326	1.16155	4.85601	5.38643	1.84467	1.0542	1.08451		11.1157	9.76855	8.16852	12.6045	10.112	7.61416	10.6263	8.71191	8.98663	13.6334		1.09193	6.12687	1.62466	4.68906	6.51288	1.12522	1.11676	7.04303	6.55005	4.47148		10.248	8.10521	9.15791	5.66494	8.91149	8.88487
9.11729	8.85649	9.08001	8.80962	8.61087	10.8604	9.72923	9.19621	11.2279	9.68116		1.01708	4.43319	7.0084	1.07482	1.13491	4.85745	5.4991	1.84049	1.05486	1.089		10.5992	9.68662	8.14272	12.6103	9.90545	7.51832	10.6028	8.89132	8.93753	13.7743		1.08698	6.11256	1.63133	4.67123	6.58897	1.12938	1.1349	7.00866	6.41218	4.47959		10.0122	8.18096	9.17106	5.51347	8.91748	8.89161
9.20997	8.79385	9.10966	8.80184	8.75026	10.6768	9.54635	9.21678	11.265	9.60121		1.01485	4.42069	7.01356	1.07405	1.13411	4.86973	5.64815	1.8618	1.05334	1.08957		9.3027	9.78431	8.14169	12.6768	9.91564	7.85657	10.5822	8.74428	8.8958	13.8314		1.0961	6.1024	1.63386	4.65939	6.58032	1.12896	1.12023	6.97782	6.33565	4.52323		10.0692	8.04905	9.19757	5.58195	8.93083	8.89675
9.08385	8.64789	9.10604	8.79944	8.55942	11.0976	9.63218	9.25872	10.9411	9.63883		1.01749	4.41997	7.00678	1.07215	1.13274	4.87084	5.4824	1.84495	1.05126	1.08908		10.9416	9.71552	8.14157	12.6295	9.88252	7.72902	10.6065	8.78667	8.93953	13.9096		1.08751	6.05795	1.62571	4.64982	6.56998	1.12577	1.12565	6.97388	6.27054	4.46277		10.2687	8.21884	9.19465	5.58176	8.88959	8.90424
9.12715	8.80478	9.07419	8.89549	8.96531	10.816	9.64139	9.2485	11.1104	9.66476		1.01818	4.43553	7.00591	1.07136	1.13657	4.8676	5.4778	1.87196	1.0524	1.08784		10.6395	9.71759	8.13376	12.6121	10.0841	7.80696	10.579	8.64308	8.94715	13.7379		1.08367	6.13221	1.63609	4.63915	6.56322	1.12364	1.12522	6.97699	6.41261	4.47573		10.2408	8.19782	9.16981	5.63792	8.89894	8.92182
9.23179	8.85685	9.06046	8.82792	8.70831	10.5368	9.43993	9.34936	11.0258	9.63057		1.0176	4.45822	7.00586	1.0747	1.142	4.86404	5.6063	1.87279	1.05447	1.09067		10.391	9.70673	8.11647	12.7115	9.95057	7.61251	10.6074	8.74651	8.911	13.645		1.09041	6.07312	1.62668	4.63838	6.50866	1.12381	1.14294	6.93297	6.31596	4.40142		10.1801	8.03025	9.22304	5.51835	8.8705	8.93035
9.19152	8.91781	9.06439	8.9319	8.62956	10.9209	9.36631	9.23669	11.2232	9.66668		1.01566	4.46295	7.01296	1.07298	1.14286	4.85099	5.4828	1.86039	1.05251	1.08934		9.74038	9.64516	8.11063	12.6961	9.81356	8.16854	10.5573	8.74891	8.94369	13.5297		1.08852	6.09542	1.62993	4.61162	6.45635	1.12172	1.12346	6.9317	6.3509	4.50918		9.87143	8.16798	9.18401	5.56716	8.91564	8.95799
9.18504	8.97454	9.06777	8.82204	8.74953	10.8237	9.50416	9.14715	11.1188	9.59351		1.01944	4.462	7.01999	1.07253	1.12709	4.8514	5.44452	1.86453	1.05114	1.08915		9.81687	9.62786	8.14891	12.7633	10.0118	7.99056	10.5769	8.78024	8.93801	13.5389		1.08716	6.08888	1.64536	4.60833	6.44883	1.12311	1.10914	6.93138	6.37647	4.45152		10.3691	8.14314	9.20586	5.54057	8.90983	8.91788
9.13964	8.89429	9.1404	8.81423	8.85499	10.7953	9.4695	9.22341	10.9996	9.61006		1.01445	4.45407	7.01837	1.07454	1.13684	4.84505	5.5177	1.86508	1.05212	1.08922		10.182	9.77321	8.11393	12.7206	9.93827	7.69503	10.5595	8.73154	8.88355	13.4922		1.08677	6.09173	1.63139	4.58436	6.43002	1.12185	1.1305	6.89839	6.34372	4.53253		10.3067	8.0954	9.21024	5.47446	8.86744	8.94135
9.11813	8.87278	9.13249	8.90543	8.70365	10.4644	9.58131	9.1573	10.8179	9.61754		1.01728	4.45449	7.02004	1.07501	1.13459	4.84132	5.45699	1.83565	1.05939	1.08857		9.66881	9.80551	8.14203	12.8147	9.91488	7.60468	10.6845	8.7468	8.89146	13.3483		1.08808	6.07956	1.64047	4.5206	6.36314	1.12186	1.15185	6.9319	6.34026	4.46444		10.3399	8.1637	9.2151	5.49839	8.87188	8.91719
9.13203	8.80246	9.12134	8.89147	8.77507	10.3284	9.56926	9.22415	11.2126	9.61135		1.01811	4.48432	7.05955	1.07425	1.14736	4.86106	5.42478	1.84906	1.0557	1.0914		10.3025	9.7238	8.12054	12.8895	9.72778	7.77484	10.5816	8.74821	8.88807	13.3282		1.08663	6.07718	1.63502	4.54618	6.3409	1.13033	1.14486	6.85975	6.30807	4.61177		10.2701	7.99763	9.22946	5.53634	8.86935	8.93776
9.15508	8.73457	9.07183	8.86242	8.53451	10.4458	9.68881	9.20101	10.9666	9.60667		1.01683	4.43437	7.04679	1.0747	1.13509	4.85191	5.43369	1.82558	1.05769	1.09288		10.5224	9.61392	8.13691	12.8501	9.8987	7.82211	10.6512	8.80124	8.90409	13.2247		1.08913	6.04333	1.63337	4.50672	6.3323	1.11827	1.15709	6.83149	6.47724	4.60907		10.0474	8.07814	9.20208	5.54443	8.86134	8.9342
9.10144	8.89086	9.12414	8.89971	8.5756	10.3435	9.43294	9.19751	11.0954	9.63894		1.0165	4.45888	7.02863	1.07645	1.12792	4.84729	5.49174	1.84946	1.05683	1.09186		10.4635	9.63853	8.13875	12.8412	10.1249	7.90197	10.6119	8.81008	8.87563	13.2355		1.08541	6.02318	1.63309	4.51298	6.31033	1.11577	1.12501	6.82469	6.43447	4.62107		10.3694	8.10223	9.15542	5.54449	8.84762	8.93677
9.12907	8.74621	9.0487	8.8686	8.4859	10.9138	9.3368	9.20356	11.0078	9.65387		1.01705	4.43537	7.05091	1.07637	1.15242	4.84197	5.45809	1.85627	1.05672	1.08676		9.54844	9.59272	8.12338	12.8322	9.98109	7.87939	10.5938	8.57416	8.90398	13.1743		1.09003	6.01985	1.63305	4.53301	6.27908	1.1255	1.13018	6.85421	6.35918	4.57632		10.4299	8.07084	9.16035	5.56399	8.80335	8.90349
9.02189	8.83907	9.06537	8.86529	8.85769	10.4164	9.4995	9.20674	11.1642	9.70983		1.01616	4.46462	7.03434	1.07591	1.13597	4.84209	5.48887	1.85497	1.05629	1.08498		10.4129	9.47058	8.10715	12.7801	10.1602	7.8577	10.6091	8.77153	8.85561	13.3115		1.08522	5.96728	1.63107	4.50402	6.28774	1.12452	1.10613	6.83551	6.3304	4.50914		10.4297	8.10647	9.1978	5.45678	8.88178	8.87054
9.06347	8.86581	9.09737	8.8708	8.55336	10.2115	9.63412	9.19494	11.2454	9.66967		1.01368	4.46794	7.02551	1.07621	1.14004	4.84338	5.54111	1.84532	1.05791	1.08869		10.3219	9.47649	8.09666	12.9985	9.99084	7.8778	10.5645	8.71759	8.86322	13.2081		1.09019	5.97087	1.64545	4.53327	6.27936	1.13027	1.14879	6.83517	6.33788	4.52834		10.2381	8.14954	9.24031	5.56759	8.82722	8.88118
9.12043	8.83589	9.02874	8.91676	8.80041	10.8827	9.58855	9.21882	11.1738	9.7054		1.01389	4.47438	7.02504	1.07552	1.16706	4.85292	5.46926	1.85221	1.05093	1.08381		11.2409	9.67452	8.09649	12.8122	10.147	8.01906	10.6322	8.79159	8.8834	13.1151		1.09023	5.9785	1.63587	4.4819	6.25433	1.12869	1.12209	6.83335	6.37425	4.47419		10.2564	8.176	9.22309	5.56969	8.82518	8.86094
9.10436	8.72792	9.07112	8.94917	8.44044	10.3661	9.5746	9.18338	11.3186	9.69691		1.01314	4.49414	7.03754	1.07543	1.12798	4.8519	5.49263	1.82859	1.05564	1.08749		10.2406	9.60069	8.12632	12.8371	10.0038	7.76663	10.5467	8.60943	8.87382	13.0765		1.08574	6.01177	1.64499	4.52303	6.25167	1.13204	1.14333	6.84969	6.42049	4.48332		10.2337	8.14932	9.25071	5.49686	8.88097	8.83886
9.14997	8.92983	9.05741	8.8137	8.81005	10.5919	9.51218	9.25214	11.1695	9.65922		1.01327	4.44269	7.02882	1.07637	1.11712	4.84466	5.56002	1.82705	1.05619	1.09103		9.8025	9.63375	8.09174	12.9239	10.1284	8.09827	10.6494	8.64577	8.85675	13.0579		1.08654	5.96979	1.6391	4.53808	6.229	1.12832	1.12451	6.85822	6.33614	4.47374		10.369	8.16958	9.21197	5.51769	8.79753	8.83643
9.12663	8.74869	9.05972	8.84778	8.99955	10.3037	9.62209	9.0877	11.2811	9.68209		1.01358	4.4911	7.03354	1.07648	1.14879	4.84263	5.55747	1.81962	1.05422	1.08953		10.9791	9.65963	8.10976	12.9268	10.1342	8.01617	10.5293	8.82979	8.82284	13.091		1.08566	5.94836	1.64173	4.51397	6.21523	1.12812	1.13036	6.87282	6.24991	4.43305		10.455	8.08877	9.23041	5.5133	8.83701	8.83362
9.52214	8.93462	9.06921	8.83552	8.8172	10.304	9.63407	9.22946	10.9916	9.67041		1.01383	4.4593	7.04876	1.07648	1.14536	4.84383	5.45135	1.85513	1.05823	1.08733		10.6353	9.60715	8.13441	12.7682	10.0952	7.68024	10.6033	8.67637	8.86067	12.9974		1.08584	6.0096	1.64755	4.49906	6.20475	1.12447	1.16089	6.89752	6.20841	4.36687		10.1707	8.03397	9.2008	5.51281	8.83933	8.8393
9.45976	8.92278	9.02246	8.91123	8.68479	10.543	9.53732	9.22663	11.2415	9.64497		1.01536	4.47788	7.04591	1.0757	1.14376	4.84881	5.53739	1.82835	1.0581	1.09081		10.3827	9.56566	8.09733	12.8124	10.0709	7.84246	10.5561	8.82462	8.80417	12.8649		1.08337	6.00282	1.64926	4.51851	6.24654	1.12306	1.12056	6.80309	6.20365	4.41987		10.1525	8.068	9.19759	5.60126	8.82479	8.85806
9.20691	8.81809	9.0589	8.86347	8.567	10.7381	9.8414	9.24014	11.0815	9.67136		1.01248	4.46668	7.09606	1.07658	1.13961	4.85025	5.54026	1.84588	1.05728	1.09227		9.39157	9.53183	8.11677	12.6703	10.2425	8.02492	10.5907	8.77192	8.83048	12.8887		1.09301	6.03114	1.64208	4.53785	6.22919	1.12565	1.10192	6.85621	6.31253	4.46568		10.6099	8.09452	9.19324	5.58522	8.8826	8.84792
9.56162	8.85039	8.99614	8.83081	8.82719	10.4062	9.54593	9.1234	11.1282	9.60897		1.01319	4.51796	7.12605	1.07667	1.13585	4.85388	5.48354	1.85502	1.05938	1.08609		10.466	9.62374	8.11933	12.5321	9.9609	7.78862	10.6003	8.71561	8.83947	12.9446		1.08519	6.07785	1.65296	4.54077	6.20552	1.12158	1.11294	6.8552	6.29159	4.38995		10.3658	8.07912	9.18414	5.43115	8.85504	8.85853
9.28381	8.8409	9.07275	8.85304	8.94736	10.6607	9.59368	9.11932	11.2962	9.62788		1.0129	4.50135	7.09676	1.07554	1.13219	4.85109	5.50646	1.83167	1.05958	1.0834		10.3481	9.48897	8.1267	12.6414	10.0453	7.51868	10.583	8.7222	8.83179	12.9058		1.09146	6.05179	1.65699	4.55397	6.21222	1.11536	1.12972	6.82918	6.3184	4.20601		10.0878	8.03746	9.18451	5.50466	8.85119	8.88932
9.28781	9.01161	9.0213	8.76673	8.75093	10.5665	9.52798	9.25508	10.979	9.65869		1.01096	4.50159	7.14293	1.07535	1.13366	4.84999	5.48468	1.839	1.06187	1.08476		9.78302	9.50704	8.09142	12.5525	9.99236	7.7549	10.5762	8.70973	8.83189	13.0545		1.09396	6.05354	1.6613	4.59717	6.23317	1.1203	1.1509	6.84676	6.22345	4.32741		10.5095	8.11714	9.19058	5.47285	8.80103	8.89542
9.1924	8.8832	8.97829	8.83369	8.70724	10.4909	9.67066	9.17505	11.0546	9.65821		1.01405	4.48832	7.17525	1.07599	1.12495	4.8438	5.49024	1.84978	1.06011	1.08123		9.57731	9.67372	8.11063	12.4257	9.81034	7.68748	10.4983	8.70429	8.83373	13.3192		1.09266	6.14552	1.64533	4.6011	6.24321	1.13067	1.13667	6.92406	6.24605	4.45201		10.5852	8.1747	9.04058	5.66484	8.77524	8.92198
9.2947	8.76923	9.00578	8.82796	8.79214	10.6259	9.6424	9.24991	11.3	9.61277		1.01626	4.52077	7.14979	1.07582	1.14766	4.84654	5.42101	1.82727	1.05598	1.079		10.3171	9.64373	8.12731	12.3632	10.1375	7.62662	10.5736	8.74289	8.84151	13.3464		1.08636	6.10096	1.64344	4.6345	6.2843	1.1267	1.13451	6.87255	6.23333	4.21994		10.1898	8.09841	8.90601	5.52462	8.75568	8.87105
9.09858	8.73436	9.06324	8.83989	8.94504	10.385	9.5736	9.16064	11.2238	9.63404		1.01344	4.51903	7.1633	1.07698	1.15071	4.85813	5.487	1.84204	1.05676	1.08333		9.88337	9.59214	8.08607	12.4846	9.92146	7.77811	10.5148	8.76898	8.83635	13.2433		1.07946	6.06979	1.65251	4.63565	6.31989	1.12331	1.10707	6.8262	6.27364	4.22858		10.3098	8.00102	8.84029	5.52154	8.82417	8.90102
9.02023	8.87541	8.99322	8.81251	8.86379	10.5055	9.53171	9.23936	11.2296	9.61155		1.01466	4.51045	7.22051	1.07472	1.14975	4.86347	5.46178	1.81486	1.05885	1.08574		10.9745	9.64164	8.09684	12.3943	10.0921	7.99359	10.5485	8.74656	8.77233	13.3016		1.08273	6.11509	1.64804	4.66939	6.28922	1.12131	1.11536	6.86378	6.25399	4.40157		10.7418	8.07679	8.74992	5.60932	8.75483	8.90159
9.45345	8.81107	9.08807	8.85949	8.91731	10.3507	9.57897	9.16861	11.3438	9.63592		1.01553	4.49169	7.1877	1.07518	1.14274	4.88212	5.47765	1.84052	1.06143	1.08482		11.0131	9.57338	8.09591	12.5134	10.0462	7.69738	10.5317	8.62882	8.82548	13.3088		1.08184	6.07276	1.6573	4.68322	6.2828	1.11378	1.11371	6.86992	6.307	4.22969		10.5093	7.9209	8.61933	5.41383	8.8098	8.87503
9.35046	8.87683	9.0127	8.84967	8.74244	10.741	9.50423	9.16703	11.2174	9.65348		1.01339	4.51943	7.18132	1.07208	1.13662	4.89243	5.46548	1.82689	1.05757	1.08677		10.7899	9.57002	8.10503	12.4248	9.94432	7.53383	10.539	8.75191	8.78786	13.4629		1.08272	6.10277	1.6511	4.7016	6.3464	1.11471	1.10176	6.86333	6.34844	4.42023		10.4546	8.13346	8.65529	5.47919	8.78238	8.85017
9.28967	8.85436	8.9613	8.81295	8.97388	10.6884	9.67351	9.21293	11.1925	9.64203		1.0177	4.52742	7.18821	1.07263	1.12445	4.90081	5.51004	1.83193	1.05685	1.08916		9.67196	9.44303	8.10034	12.3284	9.98367	8.06627	10.5256	8.64355	8.78261	13.5124		1.08083	6.07563	1.65237	4.70533	6.35737	1.12612	1.1488	6.85644	6.33886	4.39135		10.4496	8.07142	8.78631	5.58318	8.81742	8.8648
9.49991	8.71695	8.97316	8.77189	8.85605	10.6575	9.5814	9.24059	11.2406	9.61562		1.01686	4.54894	7.18715	1.06959	1.1399	4.91184	5.45585	1.84482	1.0587	1.08279		10.5316	9.65459	8.1112	12.3959	9.90242	7.84807	10.5722	8.63923	8.77889	13.5529		1.08484	6.10481	1.6597	4.73391	6.35428	1.11915	1.1096	6.86849	6.21567	4.22465		10.1818	8.12534	8.79732	5.41561	8.82321	8.86387
9.00654	8.85772	8.99178	8.83017	8.77583	10.4559	9.67188	9.16473	11.1958	9.65081		1.01498	4.53729	7.14491	1.06958	1.13673	4.92042	5.46147	1.84324	1.05472	1.08734		9.90915	9.64595	8.097	12.3629	10.0477	8.02047	10.5837	8.73858	8.78726	13.6228		1.08243	6.06892	1.64967	4.76884	6.35454	1.12505	1.1146	6.87622	6.28874	4.38943		10.3348	8.09932	8.80603	5.41637	8.82784	8.85673
9.21548	8.83982	8.97002	8.77209	8.78984	10.6451	9.64231	9.23175	11.1083	9.63579		1.01702	4.54367	7.17519	1.06951	1.14096	4.91855	5.52569	1.84268	1.05402	1.09316		10.6867	9.54217	8.07225	12.4249	10.0576	7.82762	10.5924	8.68611	8.75383	13.5449		1.08666	6.05809	1.65067	4.77307	6.35297	1.1245	1.12722	6.86471	6.31783	4.20764		10.7836	8.06768	8.78183	5.51379	8.77459	8.84705
9.24419	8.81703	8.92832	8.88096	8.86018	10.7046	9.71758	9.11816	11.333	9.62479		1.0182	4.5573	7.19321	1.06971	1.11859	4.90048	5.45572	1.84933	1.0542	1.09121		9.68701	9.5606	8.10368	12.3444	10.0107	8.01003	10.6101	8.59991	8.77665	13.6674		1.08089	6.04941	1.66517	4.77696	6.35511	1.11632	1.06502	6.66196	6.33745	4.40925		10.2763	8.09801	8.8175	5.55809	8.76387	8.81141
9.15447	8.94315	9.00362	8.83139	8.56434	10.5864	9.72055	9.15241	11.3734	9.61223		1.01624	4.53638	7.14412	1.06919	1.14456	4.89071	5.4404	1.86118	1.05419	1.08901		9.45509	9.53144	8.10861	12.4739	9.99001	7.62731	10.5947	8.73565	8.73775	13.6261		1.08369	5.99502	1.65826	4.80035	6.34672	1.12377	1.014	6.68363	6.32105	4.18693		10.3333	8.08676	8.83802	5.3887	8.7633	8.8059
9.22865	8.87243	9.00771	8.82567	8.84877	10.6143	9.72666	9.16332	11.1216	9.59131		1.01397	4.53746	7.15643	1.06763	1.10392	4.89123	5.48544	1.84342	1.05813	1.08564		9.47515	9.54928	8.10862	12.5292	9.99579	7.83889	10.6415	8.59199	8.75837	13.7144		1.079	5.99025	1.64837	4.82516	6.35076	1.11977	1.10243	6.7371	6.35402	4.39684		10.6264	8.14094	8.80642	5.58861	8.84422	8.82324
9.0366	8.91569	8.99599	8.77674	8.98188	10.3943	9.75034	9.2096	11.4398	9.64919		1.01516	4.53709	7.15754	1.06656	1.13685	4.89526	5.41693	1.8404	1.05255	1.08964		9.47515	9.46081	8.10482	12.5208	9.85389	7.8221	10.5797	8.679	8.73297	13.6575		1.0841	6.04588	1.65973	4.77097	6.36574	1.12133	1.08567	6.69757	6.39032	4.19392		10.2432	8.16933	8.79093	5.57107	8.74121	8.80488
9.16878	8.85906	9.00986	8.82417	8.63499	10.2194	9.71257	9.09989	11.4041	9.60933		1.01209	4.54726	7.135	1.06709	1.12263	4.89508	5.37701	1.84378	1.05773	1.08759		10.5666	9.43782	8.1046	12.5226	10.0155	7.748	10.591	8.56275	8.72882	13.3819		1.07781	6.06288	1.65151	4.78346	6.34531	1.11698	1.13068	6.75385	6.43748	4.38156		10.5746	8.09071	8.83905	5.43382	8.7752	8.80483
9.12371	8.7482	9.00181	8.8418	8.68865	10.4756	9.6861	9.20058	11.193	9.63872		1.01525	4.49254	7.14198	1.06774	1.1309	4.89445	5.43719	1.81166	1.05242	1.08751		10.5666	9.62032	8.1116	12.6519	9.89205	7.69493	10.5622	8.66483	8.78371	13.3669		1.07698	6.08828	1.65308	4.73174	6.38414	1.1203	1.12065	6.8011	6.22462	4.32504		10.5056	8.01167	8.85797	5.42434	8.77974	8.78909
9.32172	8.86939	8.97002	8.87517	8.99777	10.3117	9.54941	9.13023	11.3492	9.58354		1.01458	4.53399	7.16133	1.06735	1.12631	4.89442	5.54946	1.81766	1.0528	1.08873		11.4277	9.65549	8.07542	12.6243	9.93274	7.82225	10.5511	8.77186	8.75853	13.4427		1.07393	6.12438	1.66038	4.71903	6.41231	1.11479	1.12763	6.76806	5.10941	4.28433		10.7068	8.15121	8.94866	5.4508	8.72453	8.76293
9.17109	8.77689	8.89176	8.74619	8.80062	10.9518	9.80821	9.12982	11.2733	9.58009		1.01411	4.55655	7.1398	1.06638	1.11986	4.89698	5.33791	1.84319	1.05558	1.08622		9.54711	9.69264	8.09155	12.7558	9.90765	8.01254	10.5377	8.73134	8.75522	13.3697		1.08112	6.08922	1.66333	4.70435	6.38061	1.11879	1.14419	6.76658	5.9196	4.30128		10.4641	8.04693	8.83612	5.52811	8.81756	8.81301
9.08941	8.66806	8.96279	8.7893	8.56304	10.3201	9.76939	9.16448	11.5739	9.63054		1.01456	4.55675	7.15332	1.06561	1.1504	4.89577	5.50983	1.8255	1.05828	1.08577		10.1879	9.72708	8.08349	12.7284	9.97101	7.49117	10.5459	8.6405	8.72182	13.2926		1.07624	6.12165	1.65804	4.70483	6.41717	1.10979	1.13587	6.75316	6.26743	4.20347		10.4938	8.09471	9.00959	5.46193	8.75393	8.7983
9.19463	8.83263	8.86547	8.81099	8.55859	10.2586	9.79216	9.24831	11.2948	9.61341		1.0147	4.53955	7.16389	1.06519	1.13291	4.89029	5.479	1.86442	1.05824	1.08322		10.1879	9.57816	8.08935	12.6857	9.96012	7.70343	10.553	8.80218	8.72404	13.325		1.08821	6.07115	1.66135	4.66617	6.44789	1.11941	1.11807	6.77339	6.21639	4.34206		10.3169	8.10256	9.08841	5.44858	8.78915	8.82546
9.13745	8.75233	8.98245	8.88296	8.62353	10.5175	9.73181	9.24294	11.1186	9.61647		1.01512	4.55401	7.15138	1.06677	1.13857	4.89995	5.32658	1.83884	1.05434	1.08281		10.1008	9.5737	8.0941	12.6501	10.0321	7.79364	10.4916	8.67302	8.73459	13.2196		1.08615	6.07215	1.6705	4.63594	6.40954	1.1213	1.1459	6.74134	6.31053	4.34792		10.497	8.15394	9.10428	5.44995	8.79478	8.82458
9.4219	8.88172	8.96458	8.79332	8.6985	10.4127	9.58678	9.15721	11.3059	9.60433		1.01378	4.54437	7.16044	1.06544	1.11858	4.89654	5.50219	1.83475	1.0559	1.08232		10.1008	9.48703	8.06622	12.6194	9.9742	7.85446	10.4882	8.58143	8.70076	13.1308		1.08555	6.05	1.6531	4.6038	6.36846	1.11791	1.12957	6.80226	6.3196	4.27404		10.3021	8.11509	9.09991	5.59097	8.78233	8.83314
9.20303	8.81568	8.87623	8.8774	8.49901	10.6032	9.62101	9.21327	11.325	9.58477		1.01667	4.56673	7.16386	1.06593	1.13974	4.90254	5.606	1.84488	1.05065	1.07985		10.1376	9.55297	8.06757	12.5218	9.90691	7.91269	10.49	8.59654	8.70686	13.0021		1.08362	6.00786	1.66208	4.55358	6.3812	1.11559	1.15488	6.79667	6.33389	4.32951		10.3461	7.99689	9.11901	5.45078	8.79272	8.83081
[truncated: 121 more rows]
[truncated: 34 more columns]
