# Supplementary material for: UBR-1 deficiency leads to ivermectin resistance in Caenorhabditis elegans
Source: eLife journal article supplement (doi:10.7554/elife.103718), 2024-12-13
Supplement: data1 [file Figure 1-figure supplement 1-source data1(A).xlsx]

## Sheet: Sheet1
	WT						ubr-1(hp684)
0 ng/mL	100	100	100	100	100		100	100	100	100	100
1 ng/mL	88	78	84	82	88		100	100	99	100	100
3 ng/mL	60	56	60	66	78		100	98	98	100	100
5 ng/mL	55	41	50	61	62		98	98	96	100	93
7 ng/mL	48	36	46	53	58		92	90	88	92	82
9 ng/mL	38	32	28	44	44		58	54	66	80	65
11 ng/mL	38	32	22	37	40		50	48	60	72	60
