# Supplementary material for: UBR-1 deficiency leads to ivermectin resistance in Caenorhabditis elegans
Source: eLife journal article supplement (doi:10.7554/elife.103718), 2024-12-13
Supplement: data1 [file Figure 1-figure supplement 1-source data2(C).xlsx]

## Sheet: Sheet1
IVM 0 ng/mL																						IVM 5 ng/mL
WT											ubr-1											WT											ubr-1
271.998	307.046	152.289	214.568	237.4	354.412	138.015	142.084	194.558	45.8699		303.521	327.702	91.9942	139.774	246.949	171.214	121.956	177.823	111.759	209.004		5.84031	18.8789	29.5257	36.6619	22.3124	47.5605	37.6983	37.3209	12.8624	22.4751		149.744	224.728	224.203	254.127	184.954	230.116	149.102	46.4295	110.911	14.5066
248.04	296.929	165.77	200.617	257.37	344.294	157.793	187.869	188.795	49.8399		373.882	330.317	120.428	252.755	228.865	169.13	157.819	206.674	137.286	181.086		9.26502	20.8102	21.509	24.015	16.0307	0.35798	19.1691	39.658	20.6986	24.6117		152.947	228.656	144.949	253.028	183.193	177.027	175.063	68.6627	100.235	30.6127
227.569	292.95	175.918	194.381	260.605	340.873	153.667	199.617	190.645	72.7751		354.742	361.803	141.565	272.101	168.725	175.258	185.689	205.337	147.216	168.601		11.8469	13.7871	21.6324	24.9233	19.1806	8.36957	23.8364	39.589	30.8352	23.9403		163.833	244.865	136.477	240.39	150.187	131.511	172.738	77.0697	135.42	34.3419
221.179	286.624	171.348	194.444	265.23	334.613	167.419	212.082	188.181	75.762		333.069	356.181	152.978	283.089	154.299	176.835	190.045	199.057	163.958	150.978		16.5611	5.0694	6.14606	24.1736	23.3886	12.9694	14.3866	38.6916	6.66657	20.1058		168.288	241.505	144.27	218.134	129.19	123.102	162.068	71.5326	147.905	38.2419
228.94	275.638	178.545	192.519	264.189	323.805	163.542	213.579	199.297	76.8365		321.896	345.377	164.132	301.291	162.441	211.556	182.254	208.782	173.922	127.642		16.8763	2.25942	1.95815	24.0214	27.2641	16.9462	4.61136	33.9822	0.821478	19.2135		166.565	242.115	149.705	214.598	122.89	110.887	148.858	78.141	154.761	42.5156
229.129	278.392	180.148	188.674	266.459	323.603	163.716	218.107	204.647	81.2279		324.468	347.105	168.154	321.007	160.231	215.458	193.003	215.756	187.898	114.23		17.731	1.88539	6.19396	22.0346	26.9768	27.2222	1.32682	34.8625	10.4465	19.6867		170.673	240.376	144.438	202.053	115.787	96.9203	152.35	83.64	162.032	50.4002
225.279	272.005	185.229	183.82	274.571	320.77	163.977	220.144	214.144	86.7508		314.168	345.88	173.456	316.458	146.005	222.808	189.944	209.076	189.863	100.359		19.2827	8.04192	10.2073	21.4648	26.1821	28.6595	5.89558	34.8916	15.4252	21.0686		176.525	246.578	152.123	199.603	109.775	94.052	164.172	76.0355	165.859	53.0758
223.343	265.175	189.903	186.529	276.986	321.098	163.409	217.203	215.221	89.9342		315.976	341.377	174.057	312.725	150.091	229.613	195.792	207.345	196.48	95.137		19.1972	11.0984	15.317	23.9462	29.2637	28.1704	9.4705	35.0607	23.0216	17.6702		179.734	261.293	156.011	198.543	110.327	89.5914	174.868	75.7006	175.95	59.9359
212.559	260.222	188.04	184.059	275.068	317.308	164.949	220.597	214.082	88.6381		314.289	340.77	162.481	305.895	158.015	226.709	191.358	214.857	197.474	88.7953		18.4241	14.848	17.4245	20.4836	28.5594	27.6133	16.1721	37.6485	32.3797	19.7759		181	268.419	165.061	217.247	116.481	111.059	166.958	78.9433	177.227	66.1526
220.451	256.571	190.975	183.093	275.3	311.371	172.469	224.323	221.739	84.5996		306.612	327.662	149.754	290.426	169.309	224.323	184.039	212.61	196.704	92.2703		17.5281	15.9279	23.0019	23.009	27.7433	27.6133	23.1369	35.4126	36.2032	16.1977		180.782	270.632	160.836	229.461	128.92	117.398	169.535	76.2865	180.191	74.216
219.991	249.035	204.083	179.03	269.588	310.41	166.543	222.051	222.768	91.203		316.231	321.133	133.819	275.533	179.333	219.883	184.303	213.59	188.104	122.82		14.1933	14.5372	22.5827	22.2247	24.8471	27.2362	28.7966	33.6454	33.7091	16.951		180.475	271.039	163.333	231.118	128.437	123.58	174.652	79.8308	170.599	78.9179
215.704	259.249	203.274	178.02	258.622	307.84	162.926	223.912	229.523	87.8223		324.158	318.729	119.541	266.322	179.652	222.311	171.811	215.842	168.464	132.759		12.7124	14.6784	20.8922	20.4976	24.8813	29.7601	35.0314	34.1185	32.4938	17.5837		175.786	274.401	158.439	241.148	134.061	129.417	178.835	82.6737	169.018	85.8445
207.799	277.07	209.235	181.138	257.117	312.783	155.808	223.202	227.767	91.4648		325.922	320.705	101.39	243.327	169.961	208.23	171.379	207.152	160.481	143.6		13.4749	16.046	21.1464	19.424	24.0577	27.3864	36.0513	36.9153	34.1097	16.4099		175.329	273.377	153.69	240.3	137.845	130.845	179.855	80.4954	167.236	88.1985
205.461	281.638	200.337	178.467	255.212	318.61	156.957	218.712	225.205	93.6559		319.099	332.072	81.937	228.607	168.506	189.696	170.785	197.711	145.18	153.727		16.0828	16.4323	25.3427	19.1097	20.7503	27.3943	33.2509	36.4803	35.6239	18.0048		175.453	267.664	151.461	241.386	128.703	131.928	181.131	94.7538	161.348	84.7127
198.146	277.425	203.36	173.246	254.534	312.73	161.701	228.026	223.283	87.1035		304.978	331.688	69.6573	215.065	162.976	188.372	160.935	191.132	142.442	159.458		17.2262	17.7189	22.538	19.1097	21.5957	26.0437	37.3868	34.969	29.6332	15.8765		175.135	267.939	147.242	246.206	151.323	130.579	165.514	87.0297	161.679	85.2326
195.892	288.156	202.325	172.891	245.134	315.004	161.125	229.222	219.216	79.9792		288.657	348.304	60.7035	210.789	162.019	188.531	167.844	196.439	141.617	165.461		14.8189	14.4748	28.0706	21.3212	22.0208	26.7872	35.7447	35.1886	29.2071	11.2507		169.205	257.703	152.204	239.418	170.462	152.835	144.317	99.09	165.006	82.0919
198.682	289.726	196.797	170.63	242.11	317.857	167.391	234.427	221.346	79.451		279.992	357.791	57.1321	222.424	166.116	182.741	154.374	192.777	134.97	167.98		14.3054	15.2573	27.7764	18.6796	18.6637	27.476	34.7467	34.2025	28.5309	6.41906		162.184	238.534	150.844	235.716	189.044	147.5	123.871	107.53	157.641	79.8716
206.219	292.555	204.723	171.078	245.545	324.8	168.083	234.452	221.55	87.1691		272.966	357.213	64.4725	209.072	175.238	186.61	155.032	176.431	133.121	168.868		14.4463	16.4557	29.9388	20.4745	20.4085	28.6803	33.7204	30.0764	29.257	1.31224		163.265	221.508	150.147	213.259	205.94	151.091	115.201	107.942	148.292	81.927
200.476	292.254	201.959	164.872	246.794	330.643	159.851	227.606	213.516	99.2756		269.685	355.625	68.2293	240.185	182.319	190.59	153.695	176.362	126.927	158.545		14.8406	13.5387	32.3293	16.654	18.1357	29.2415	32.6636	31.4114	34.1782	6.41723		174.783	219.643	156.586	197.209	218.85	141.971	120.563	130.915	141.433	74.6049
202.31	297.618	192.671	166.294	249.264	336.241	157.793	223.244	214.16	105.261		254.15	357.474	81.7994	253.697	170.748	205.926	159.152	177.589	132.666	132.805		16.4111	14.0153	34.8478	16.7966	11.5595	30.62	28.3387	34.0456	29.9741	8.81638		178.185	226.259	158.428	198.834	242.693	126.423	117.824	138.644	153.587	72.6722
192.035	285.965	191.324	164.658	260.769	341.952	151.389	218.364	206.012	112.564		244.402	352.338	89.8749	268.192	169.381	209.961	168.048	173.776	146.2	152.744		17.1142	13.1242	38.0732	19.6364	3.98997	28.4741	21.5237	35.3702	28.855	11.2346		184.143	226.282	159.582	199.839	259.306	115.201	115.846	148.643	148.951	67.2619
193.508	276.442	176.337	160.794	258.927	338.778	154.936	224.7	204.24	120.537		250.314	337.908	106.677	285.92	179.387	201.28	166.432	179.514	147.91	163.177		19.2117	11.5312	41.076	19.6364	1.00077	30.6325	19.2719	35.3972	28.2342	15.5756		207.845	241.221	168.726	207.842	280.022	139.606	124.816	146.541	141.411	70.3894
192.592	275.722	179.554	162.011	264.664	334.013	156.69	229.067	199.809	120.239		248.295	331.23	114.58	298.85	189.141	209.72	180.87	179.563	152.309	171.865		16.9537	11.9203	41.5017	19.978	7.27697	28.4663	23.1895	40.8903	28.5138	21.3454		215.499	253.621	175.732	211.118	312.586	135.848	123.959	130.737	144.455	70.9452
193.895	272.006	169.788	165.585	265.636	336.283	149.464	224.45	196.292	132.702		258.447	337.324	125.574	309.98	210.214	216.767	187.687	188.146	146.067	177.502		18.4292	12.6852	45.5341	18.3749	10.9467	28.3385	18.5025	38.0579	34.6232	22.8739		217.767	264.671	181.234	213.53	311.476	143.937	135.698	147.621	131.051	76.3354
200.936	258.321	163.497	168.987	269.956	329.37	151.926	222.724	193.28	143.317		261.679	326.303	129.358	309.648	208.531	241.305	179.907	186.212	153.515	189.486		21.3713	15.598	39.5128	16.1634	15.7255	28.4942	19.8183	37.1108	35.2491	24.6752		226.38	279.877	175.545	222.654	313.686	119.093	142.109	149.599	129.723	82.4122
192.529	264.881	168.279	172.369	268.063	324.294	143.51	220.989	189.428	144.797		262.425	315.35	124.568	299.828	208.98	246.165	188.938	206.184	155.305	185.257		21.8357	14.8805	46.7861	17.1354	20.3723	30.0574	20.3896	35.5209	36.9286	21.5778		230.157	282.222	185.326	226.953	309.708	111.132	141.562	144.696	127.193	87.8442
186.057	255.463	161.701	170.274	261.51	316.689	142.985	218.897	190.869	140.631		262.616	308.485	127.945	310.358	206.513	249.764	189.23	216.452	147.588	209.447		22.2236	13.3756	44.1341	17.3354	25.0098	28.2335	20.3049	36.1675	41.256	18.8943		229.112	297.772	186.507	231.64	299.162	84.0953	148.893	154.148	132.88	85.7404
190.727	267.059	160.526	184.17	253.838	313.508	138.171	227.624	192.907	132.918		268.591	310.783	124.944	283.325	209.464	254.78	194.028	210.82	147.442	221.476		22.5002	15.387	40.5456	18.6304	34.0296	30.1125	21.9463	42.5549	44.0447	16.4361		221.095	314.932	186.612	233.222	305.641	86.5443	139.847	131.702	134.108	93.1489
178.033	278.209	162.781	180.503	253.114	304.423	146.395	224.333	184.781	127.128		272.325	313.855	121.109	273.033	225.882	244.707	192.531	204.72	142.107	221.192		22.4954	14.273	37.0534	19.6407	31.4682	30.2851	20.9737	38.39	43.3593	19.0453		218.958	303.782	188.767	242.334	302.393	85.9885	133.851	122.281	126.168	95.2034
193.488	286.243	164.471	180.057	251.234	303.132	151.107	231.984	187.206	123.763		279.27	329.808	125.497	258.62	232.66	239.658	191.237	206.491	152.143	196.071		22.3326	15.702	34.0742	18.528	29.4206	32.1899	27.4527	36.3833	43.6944	19.1801		225.011	303.816	197.844	246.055	306.389	88.7187	129.805	107.716	130.117	101.094
188.046	280.563	169.35	181.608	258.827	307.843	150.912	230.522	181.989	114.782		273.41	349.588	113.715	240.473	233.449	244.106	193.877	209.886	158.937	190.579		19.2753	17.7497	30.8825	20.6276	31.2713	31.7613	26.7497	35.51	47.367	16.2367		208.433	289.633	192.682	238.455	310.645	73.4293	113.806	97.2952	135.067	100.087
182.177	275.853	164.295	181.465	258.056	306.757	150.636	232.81	182.233	112.054		283.302	361.115	117.843	231.986	227.712	231.957	177.509	199.844	164.044	181.392		18.9867	18.4519	25.8251	20.2456	29.161	33.3665	23.2624	36.809	45.5731	17.8885		203.402	273.115	189.042	237.167	300.171	74.6029	111.464	99.1372	133.148	106.444
176.239	275.313	167.953	185.797	260.508	307.25	153.763	240.103	179.225	108.888		276.516	362.96	118.425	219.848	208.121	228.202	165.531	180.665	167.01	183.603		16.6785	14.6261	20.7194	23.5215	31.0047	34.8241	24.6829	40.238	38.8257	20.3171		203.89	263.502	184.453	238.056	299.942	59.1938	146.784	83.7995	144.726	101.433
165.834	279.902	166.416	185.229	261.06	316.507	156.872	244.822	172.754	107.545		268.859	372.375	125.275	220.93	208.713	196.422	162.595	177.561	159.396	175.866		15.9745	11.8427	21.8503	23.5215	27.8975	33.4296	21.4561	40.1948	35.8108	19.0764		201.524	251.1	183.498	230.758	291.731	57.163	144.062	81.3058	142.608	98.3157
167.801	276.724	156.996	182.326	261.63	325.804	158.336	250.669	172.57	107.931		267.358	369.086	130.762	220.548	208.119	192.104	146.636	154.599	159.662	177.878		18.3646	11.8334	13.8745	26.1601	24.8406	31.2849	21.1984	43.1792	39.0259	19.623		203.223	248.086	176.116	226.53	281.828	56.4358	152.792	75.1396	144.329	101.731
168.686	287.653	153.382	186.452	265.682	331.38	160.46	255.761	167.74	105.666		265.626	359.533	124.696	222.854	202.691	182.242	147.52	152.863	173.711	157.362		20.3506	14.3287	15.1896	25.9601	26.5777	31.7571	20.3366	43.6147	34.2681	17.7751		201.612	227.129	172.748	220.559	278.197	65.4865	152.904	58.4257	147.61	105.027
164.74	275.61	148.434	182.794	269.742	334.195	176.231	256.243	169.479	104.625		260.062	352.381	129.92	238.911	197.231	178.368	140.476	152.52	179.162	167.592		22.6043	15.2099	15.6878	24.699	19.0209	29.1867	17.865	35.4409	26.8868	19.4874		203.563	197.431	175.22	225.119	262.513	66.6624	153.576	55.498	138.914	102.016
182.337	260.534	136.995	195.147	267.06	336.214	177.927	266.791	175.2	100.463		263.67	339.83	119.038	275.181	193.213	173.787	132.591	148.887	184.432	173.262		21.512	18.0773	16.7425	26.1475	19.3626	29.0664	18.512	35.1898	34.5476	17.4953		204.56	188.402	166.747	215.419	254.851	72.2507	151.274	56.4577	137.033	106.124
192.143	264.752	133.503	202.824	265.803	328.91	180.966	265.817	173.869	100.802		256.302	338.016	118.553	282.662	200.886	177.509	127.591	149.4	170.761	177.723		20.1045	18.0792	19.002	24.6641	16.5672	27.1088	12.622	35.8413	36.3648	17.4816		197.04	171.106	162.431	206.909	244.44	71.1775	151.727	54.7278	127.976	105.87
202.644	273.372	134.038	203.341	266.94	323.906	189.309	268.118	172.487	103.384		245.201	336.268	129.874	294.726	196.46	182.906	121.621	139.365	165.495	161.095		20.6942	16.7817	19.6656	21.558	12.8202	27.2578	12.9245	35.9811	33.0355	19.6356		192.432	166.217	157.836	205.743	231.035	72.3227	157.423	61.1258	129.91	110.199
209.118	278.811	140.158	212.051	267.053	326.043	188.673	266.311	167.926	104.344		242.963	334.01	138.31	301.778	197.664	195.307	123.233	140.596	170.595	160.181		19.7544	16.7817	20.6999	23.0501	15.4538	25.7926	12.2601	32.4825	33.637	16.1795		192.742	154.584	166.786	199.747	226.903	82.0573	158.94	61.8201	137.912	111.78
217.18	285.079	142.106	234.049	263.783	323.088	191.925	261.272	162.847	110.478		249.27	326.125	139.086	311.016	202.95	189.066	140.724	148.479	168.787	153.68		19.7463	20.1922	21.4706	21.6838	14.3903	25.0805	10.3626	33.7449	34.2023	16.3932		188.053	149.154	166.761	190.631	218.745	96.6318	116.186	77.0312	130.66	112.402
222.567	286.396	142.494	249.41	257.303	315.942	197.382	262.494	161.338	117.712		269.631	312.771	126.147	308.212	218.149	192.912	146.549	146.465	173.347	158.656		19.4942	21.6789	21.1097	23.8405	16.068	26.5641	16.0859	33.3368	39.9559	15.8587		191.141	142.874	168.622	190.68	212.176	119.285	116.098	71.8273	135.302	114.176
224.632	295.937	147.357	249.507	259.306	306.448	197.56	253.831	158.294	119.326		277.946	323.314	117.788	301.652	249.8	188.48	161.368	148.618	176.797	164.596		16.4229	23.4772	23.5291	20.6688	16.0588	26.1474	16.8363	28.6325	34.3666	16.2957		191.711	136.087	170.966	182.578	216.846	122.073	99.1465	72.1722	130.371	109.548
224.132	304.342	141.299	247.112	259.192	298.064	199.895	247.917	156.202	120.328		278.317	342.746	122.302	302.414	243.188	223.388	163.207	143.013	166.618	196.51		13.3084	22.2479	22.8965	19.6998	13.9131	28.004	16.2816	28.1557	36.6679	20.5465		196.424	126.378	172.542	187.619	227.641	140.072	96.1384	73.3223	109.896	107.698
227.745	303.837	141.603	236.062	262.012	288.799	196.695	239.065	145.331	124.864		283.084	365.409	115.121	290.936	247.966	226.346	168.439	146.605	170.184	181.107		11.1196	21.9206	23.4396	21.7695	15.0065	28.6966	20.0286	30.2539	40.2633	17.4002		194.278	142.908	165.203	182.793	234.82	148.971	108.299	80.4072	123.949	113.191
214.762	307.429	145.066	217.988	262.505	288.245	181.199	233.747	139.651	130.904		268.481	390.053	120.588	255.103	247.707	232.412	177.325	153.684	163.393	181.029		13.0328	22.982	21.0165	17.6338	13.2046	27.8667	19.4296	31.0052	38.9332	17.8351		185.694	156.187	164.671	184.406	233.983	154.334	105.294	91.7489	113.025	108.548
211.34	297.478	142.872	198.321	263.875	284.19	172.774	231.892	137.55	131.864		268.553	395.821	121.425	255.68	242.474	234.239	179.967	144.747	161.541	175.588		15.5881	23.521	27.1665	19.1171	15.4079	28.818	20.186	31.8218	36.3209	18.7734		176.979	183.947	156.626	194.895	237.644	157.453	117.275	94.5979	117.782	117.237
203.333	282.689	145.94	181.726	258.468	282.857	158.449	226.686	130.664	135.487		271.542	393.23	120.147	246.483	245.987	235.827	188.72	149.068	153.555	199.465		14.9984	23.8211	34.3912	22.1034	15.1469	28.0487	19.7787	33.4601	34.878	17.7367		174.434	185.207	158.762	198.76	244.251	153.196	122.891	91.7184	122.168	112.85
211.694	281.705	140.027	162.351	254.579	281.126	161.434	225.784	133.189	140.707		268.81	378.918	118.735	236.087	242.107	225.748	192.719	161.891	144.646	200.23		16.6003	23.8211	30.9572	23.5479	12.1187	29.0946	19.2465	31.4099	36.1007	21.0326		167.82	215.024	148.714	203.522	240.767	156.796	124.335	109.509	115.327	117.013
205.914	270.383	140.696	118.867	254.157	286.881	157.447	227.375	139.259	138.549		272.702	372.444	114.866	248.616	237.753	233.473	184.983	160.032	142.607	215.519		18.2768	23.8957	27.4399	25.9114	11.0801	30.1625	24.5784	27.8343	37.0016	18.7062		154.948	209.78	154.256	213.624	235.73	161.301	125.877	90.6302	120.774	119.776
196.77	269.196	145.884	95.0401	254.959	293.212	153.97	224.537	142.832	135.002		263.742	374.886	108.85	256.644	228.349	237.271	188.947	165.963	132.55	211.788		17.4031	25.3246	20.8224	23.7547	11.552	28.5929	20.3065	28.6528	34.1196	20.3105		137.635	194.869	159.039	210.658	234.419	154.924	125.716	93.6506	114.328	120.691
204.187	256.596	141.181	90.1989	249.098	291.743	156.44	227.53	145.043	137.688		257.523	358.031	116.925	285.78	196.888	244.886	184.697	168.441	123.781	207.989		21.8974	26.9808	12.3924	24.2878	15.0847	29.5674	20.7563	28.1962	34.7401	20.4271		127.641	205.013	155.403	218.767	233.051	170.397	131.308	97.683	118.009	120.267
221.22	250.01	154.322	86.605	245.166	295.625	148.822	234.175	145.381	139.524		264.226	350.77	116.321	293.529	210.587	212.212	179.419	169.039	124.844	180.725		23.2879	25.6836	7.49812	26.345	18.6466	23.2617	20.3024	28.1114	32.5745	19.4808		122.42	216.046	157.51	216.873	219.917	153.079	129.767	101.82	131.705	123.522
222.809	246.824	155.078	84.9236	240.197	300.978	148.551	244.806	149.554	139.116		267.659	336.797	133.117	295.587	209.266	213.13	173.413	163.715	117.672	174.619		25.434	23.2086	3.47622	26.1747	17.286	18.8235	17.7	26.7907	31.2024	19.4879		111.284	187.363	162.165	212.828	216.755	151.955	117.746	100.721	116.116	122.003
226.418	239.086	160.84	79.7017	243.267	303.449	153.414	248.904	153.41	134.094		279.946	325.328	160.152	292.758	206.238	205.551	164.088	154.678	123.706	168.203		24.3919	21.5635	0.017671	28.9901	21.7063	12.7286	20.0353	28.1503	26.7464	18.0544		116.999	169.945	158.511	207.961	231.959	152.364	122.917	115.671	127.12	128.433
220.762	217.787	169.453	78.9041	244.664	310.411	165.321	248.979	149.94	133.789		292.493	313.37	171.478	301.59	202.781	203.608	163.059	158.711	125.652	177.301		22.9943	21.1008	15.5542	30.3332	19.5374	6.28217	18.224	27.577	26.1974	18.6294		121.402	144.025	161.565	191.833	231.813	147.396	109.827	122.203	117.424	122.486
225.196	240.586	165.831	80.739	243.805	313.036	192.08	252.14	161.009	127.943		302.455	303.147	178.582	312.083	204.493	204.012	153.76	155.396	134.669	177.729		24.8513	21.852	27.8242	28.3534	19.452	1.06123	22.3631	30.1484	25.9644	18.2889		125.987	139.795	162.455	191.378	227.367	154.85	99.128	132.287	102.706	123.827
218.614	238.608	171.06	76.5108	246.687	317.311	192.181	253.668	157.094	124.734		319.201	304.126	183.261	315.746	209.117	206.655	150.998	150.374	150.219	184.443		23.1948	20.1631	29.3214	28.2988	22.3938	4.93827	26.6652	31.3613	23.4735	15.8862		127.865	107.301	169.615	185.091	230.588	150.876	111.619	116.695	87.4343	130.713
221.456	238.214	171.569	82.1216	243.399	310.726	198.083	248.556	158.029	119.221		318.018	297.138	201.376	298.605	215.878	204.472	143.641	153.372	147.275	168.916		21.4402	19.2893	31.506	26.1074	23.1434	11.3493	21.2451	32.698	22.1021	16.7904		139.91	107.52	156.125	181.076	228.005	147.804	123.984	130.793	82.1131	129.062
230.024	239.744	173.29	82.6135	245.508	305.929	202.5	255.388	161.641	118.008		316.924	270.899	224.708	285.267	204.739	195.76	132.527	149.698	150.823	166.097		23.7461	18.9795	29.7346	26.1074	25.1155	17.2151	23.061	34.7632	22.0456	15.068		149.228	117.633	146.402	183.795	230.964	137.5	137.582	124.85	79.9088	121.958
215.664	233.308	180.432	78.9079	251.261	305.857	198.417	255.101	157.255	112.516		323.125	254.192	231.675	260.223	222.036	181.385	134.85	146.622	155.2	163.636		20.2816	16.9445	31.6334	26.2375	21.0985	22.7051	22.1199	37.6295	25.2782	14.5505		156.687	102.35	146.765	173.462	219.399	127.528	161.911	126.667	75.3567	126.076
199.819	241.076	174.294	76.7943	248.413	301.571	202.22	251.479	158.845	109.709		320.723	220.35	236.812	248.414	206.365	189.553	130.605	150.592	156.272	156.935		22.8722	18.6581	25.8656	26.8126	14.1796	23.162	23.0159	37.781	26.1851	13.006		158.495	95.3717	139.546	167.813	222.598	128.584	173.518	126.412	63.5813	126.631
199.276	248.128	179.616	73.8199	252.338	308.96	205.094	244.874	158.012	106.284		321.252	195.676	236.053	238.57	195.075	197.62	138.38	146.399	164.804	157.894		20.5857	21.6258	19.6028	26.0017	7.06055	18.4401	27.2089	43.0721	24.4608	14.5613		161.283	100.635	133.934	165.122	224.137	135.599	182.127	122.272	75.0154	124.905
196.581	263.49	179.921	72.7928	252.458	308.301	214.803	239.403	154.485	105.049		319.946	187.467	220.509	249.746	205.347	203.024	139.666	159.802	162.587	159.806		22.1037	22.1497	15.0218	25.7021	0.917051	11.2641	27.1368	43.9729	23.6589	15.9906		156.575	96.2995	129.113	165.1	223.402	157.718	186.852	101.127	67.221	118.64
202.048	284.172	177.275	75.995	247.915	310.581	216.173	239.604	153.013	98.5616		313.79	187.225	209.459	234.198	212.866	188.444	138.08	155.953	163.369	179.224		21.7333	22.1977	9.39058	25.4342	5.52547	4.69485	28.8986	43.004	25.679	15.2703		156.633	87.8549	120.999	180.157	226.546	171.694	193.718	92.3533	76.9458	109.987
193.148	271.016	185.168	96.9534	245.738	304.055	205.587	235.604	143.122	97.0695		321.028	190.318	209.411	227.498	210.879	188.127	166.725	152.94	165.044	160.983		21.8846	20.636	4.19493	25.8144	8.35946	0.555225	30.9499	38.3746	28.7509	16.9373		154.494	79.3777	115.608	168.615	225.671	181.05	208.486	88.9225	85.4317	107.759
203.564	278.37	185.82	117.32	246.519	297.739	211.373	233.493	148.026	89.0849		310.485	185.376	207.976	234.515	203.701	189.394	169.887	148.197	153.397	149.386		24.6989	21.2347	2.89671	24.1815	15.0641	5.17875	26.3682	37.7972	33.9962	16.3688		157.633	76.5145	99.6233	176.39	222.844	190.855	204.777	96.3685	96.7099	92.5853
205.339	285.227	189.036	140.29	256.219	296.037	209.993	233.291	142.408	86.8926		313.417	185.653	195.033	255.612	201.914	215.237	176.138	143.096	160.083	147.875		24.8569	20.615	8.50632	23.7029	24.4785	9.24953	27.5932	37.8671	40.5688	15.2039		155.616	68.5896	105.83	182.371	223.967	183.908	197.421	83.1524	95.5654	90.8368
205.152	284.516	189.504	155.681	255.492	286.241	201.051	224.525	137.424	86.4578		316.686	217.813	185.249	272.28	215.763	221.422	185.358	144.563	157.702	145.776		22.9861	19.1927	15.9993	26.4362	30.682	14.3247	27.1189	37.203	39.1396	16.1364		158.932	58.2189	101.086	185.055	219.532	181.512	188.53	84.739	89.3483	95.6379
217.906	290.344	188.646	166.669	253.733	277.27	204.631	221.435	140.966	87.474		306.439	234.029	180.412	273.625	200.377	235.237	185.641	141.068	159.317	155.521		23.1492	18.3966	23.3531	26.3062	36.5244	19.9161	32.1636	34.09	36.5419	15.9883		161.979	53.8153	97.8069	200.838	226.764	210.6	173.196	78.4085	88.0091	93.1107
223.303	276.66	192.704	175.729	257.796	279.469	213.729	219.26	139.723	92.7531		303.923	258.479	182.053	283.095	213.466	229.908	194.336	139.932	162.819	154.531		22.0357	19.258	24.7419	25.0042	36.4846	24.8831	36.4171	32.8481	34.1543	15.7697		162.719	46.5689	104.845	208.679	228.28	210.505	166.988	78.6888	90.9439	88.9732
227.943	278.667	197.339	187.362	261.179	269.251	216.781	215.433	148.521	95.59		301.975	272.084	177.638	292.769	220.497	220.141	188.271	149.144	154.854	152.657		24.9144	18.393	23.449	26.6516	32.5932	24.0367	34.3964	29.4443	34.7597	15.94		165.42	39.5196	118.058	216.493	231.576	200.386	164.144	78.5146	89.6914	91.2936
241.958	263.105	206.34	211.755	264.611	266.985	221.324	213.174	157.415	98.8077		303.36	256.569	171.762	281.017	213.098	219.549	189.871	146.912	155.219	150.793		22.9665	17.6117	22.997	25.6726	39.4718	22.2963	33.4303	27.8428	34.891	15.2374		174.281	36.1795	130.405	216.31	225.948	181.825	161.978	74.955	100.206	93.6806
245.299	280.462	214.502	232.178	266.553	264.933	225.5	210.292	170.074	105.183		303.646	222.929	170.623	279.13	210.629	231.965	187.519	155.602	152.387	117.074		22.294	17.5712	24.2015	21.5729	34.981	20.8805	32.6875	29.0467	34.1513	17.7287		178.073	36.3625	136.706	205.305	216.787	171.974	171.75	74.2589	94.2414	99.1061
271.624	283.294	215.731	226.701	269.415	264.464	228	212.847	182.929	110.234		289.479	197.484	163.203	270.575	208.806	236.253	164.3	159.657	151.325	111.573		19.261	18.2395	23.4878	17.0192	39.1232	23.0363	28.7549	28.1576	29.7017	16.5266		176.201	52.4388	143.909	214.263	212.704	147.417	172.466	74.4754	88.3865	99.6239
259.641	273.6	221.144	225.13	268.594	267.807	230.559	213.742	185.627	118.978		281.815	185.326	161.405	253.887	209.627	233.676	164.686	166.494	147.698	120.642		17.0427	19.1192	21.7756	11.609	37.9766	23.3146	29.7053	27.4516	26.9193	17.0616		172.031	50.5097	158.69	209.229	209.337	129.395	172.605	69.9709	86.3973	104.028
266.811	272.248	226.404	219.678	269.128	266.885	233.553	217.519	191.047	117.843		263.847	168.165	169.194	223.345	200.492	203.379	161.131	174.002	132.966	120.653		19.3368	17.1473	21.4112	6.58566	30.3138	21.5888	30.7524	27.5362	22.8672	19.6856		175.445	45.9904	157.251	204.875	207.905	127.034	170.092	79.1994	86.6629	101.779
269.531	267.61	229.66	217.202	272.35	267.664	238.614	219.108	198.885	116.957		262.157	132.057	193.365	194.688	185.531	203.883	158.063	175.331	135.588	120.065		18.2681	17.4504	18.4779	1.04914	34.5516	23.8873	31.642	25.8836	24.2964	20.3685		170.104	50.9879	166.854	202.795	213.821	150.773	166.644	73.4995	93.6996	100.947
258.514	285.225	235.596	220.474	271.974	279.127	236.837	221.436	199.37	116.16		266.913	110.325	221.095	184.907	181.522	197.036	157.284	186.868	133.298	108.622		18.4676	19.359	19.03	4.44086	30.407	24.3524	28.9029	29.0234	29.4338	21.5875		166.625	51.312	168.428	188.293	217.408	124.714	160.966	76.7234	98.8564	95.8984
248.767	285.96	235.97	227.228	276.999	280.251	229.787	220.316	203.617	117.18		266.749	96.7071	225.93	165.361	182.962	197.232	149.204	181.407	127.095	104.868		17.5012	18.7	16.6441	10.6163	29.6257	28.3282	25.1829	34.9445	31.8214	20.5046		160.887	56.1718	168.643	184.1	212.102	119.205	161.088	82.4513	99.5168	95.2892
236.577	282.311	236.278	236.827	282.698	285.629	221.644	218.05	203.332	119.862		258.591	89.0152	238.809	159.913	175.388	190.062	156.494	172.091	127.01	99.1259		15.3647	16.7825	15.6927	16.8161	30.9767	26.6361	23.9474	38.3358	32.0893	20.2925		157.935	62.3993	159.915	182.519	204.98	129.26	155.47	78.076	89.3124	90.9551
219.948	263.963	238.209	234.699	279.93	281.783	215.326	217.326	199.993	122.644		239.04	80.7561	234.834	149.899	177.957	193.487	166.224	170.721	121.262	100.544		17.1875	15.5779	15.9838	21.799	24.2789	26.6412	22.6609	39.7966	34.6695	20.256		152.082	67.4971	157.179	178.793	197.549	141.806	182.061	81.706	80.5195	87.2049
201.187	249.343	234.089	229.884	282.612	283.357	207.652	218.925	198.499	124.155		209.234	89.9835	241.397	150.324	190.804	188.787	160.212	168.613	123.377	101.726		18.7071	16.8025	16.5489	22.948	27.6716	27.235	22.7469	39.7989	37.5181	19.168		144.755	78.4841	161.482	178.219	200.551	143.78	182.472	103.999	93.6267	79.3015
183.191	245.599	237.648	233.859	283.644	290.058	194.818	222.836	194.816	127.529		193.836	99.7681	249.205	153.512	201.36	196.452	170.91	169.654	114.571	117.602		20.8612	17.0738	17.7021	22.293	25.0004	25.9295	21.5298	38.3452	40.18	19.168		143.361	66.9674	156.472	171.928	203.711	144.292	175.71	128.218	98.2948	79.1664
188.319	245.296	233.275	236.766	279.599	286.435	183.501	222.841	192.265	130.453		171.388	107.486	246.504	163.022	204.394	204.734	169.431	172.722	109.887	105.286		23.0087	15.6359	18.3381	21.1413	28.0157	27.5539	23.4808	38.7432	38.3838	20.1068		144.703	76.5168	158.17	172.548	205.895	159.875	182.326	126.74	107.892	80.0611
177.446	247.915	234.17	241.923	277.396	288.939	178.296	222.169	188.435	138.864		138.487	129.927	244.788	171.824	210.081	202.299	173.382	172.766	116.781	99.2762		22.9763	17.6078	20.3461	20.5182	32.4295	28.4155	22.7239	40.3704	38.873	17.819		140.049	81.4982	161.558	175.401	214.295	163.69	189.295	127.41	109.273	74.3147
175.403	247.869	237.855	244.425	280.25	294.744	174.303	223.37	179.315	133.838		82.6579	155.131	221.949	188.271	221.504	195.882	173.226	167.901	110.696	104.267		22.6183	19.6344	17.919	17.8622	27.7051	28.793	19.522	41.465	37.024	19.4775		131.859	82.5305	154.954	175.556	205.952	147.241	194.518	144.805	115.938	78.4579
184.867	234.275	233.675	242.788	278.066	295.192	173.175	222.096	183.262	136.893		31.5624	175.899	186.613	196.894	225.231	205.048	170.252	155.361	115.275	129.43		22.7761	20.3415	15.8658	20.0203	33.3226	29.7278	22.352	42.1418	29.5523	16.9568		127.25	86.5482	147.59	179.554	196.616	145.107	197.136	149.149	126.16	78.5368
191.97	240.02	236.34	237.579	278.442	297.041	162.65	222.308	182.492	133.874		43.0681	190.323	171.903	228.195	224.181	202.305	175.953	158.326	118.035	133.889		22.5568	19.292	15.5703	17.4131	33.7346	29.5603	22.9776	35.195	29.9136	20.1678		128.097	85.5228	141.229	202.974	196.806	139.906	192.512	140.589	135.123	76.0147
200.408	238.813	232.86	235.396	274.071	293.829	181.715	224.447	183.435	131.455		101.353	202.333	143.165	234.522	230.497	200.929	163.778	167.74	118.769	141.384		22.7255	21.7649	15.2425	16.8339	31.6667	29.8225	22.7738	30.4863	30.5686	18.7619		126.75	92.5014	147.83	207.914	188.905	125.63	191.63	147.544	147.279	71.839
232.268	252.032	224.535	233.066	272.651	299.121	187.192	232.07	192.265	137.878		147.03	228.986	137.585	244.411	228.496	198.511	147.21	164.608	122.747	135.377		21.1164	22.7299	16.2195	17.2914	34.6659	29.678	25.0926	31.2381	28.176	19.5051		127.817	92.0899	150.119	215.545	195.584	106.888	163.691	144.067	168.259	75.7988
252.482	254.178	226.756	229.113	271.873	294.411	185.539	229.321	191.254	138.756		200.592	255.436	125.006	257.363	219.993	213.651	159.852	164.027	115.48	140.538		19.7986	21.8822	16.1979	16.2729	32.9616	29.9854	24.7602	32.1751	24.3703	17.6465		129.358	87.136	142.966	217.67	188.748	110.299	146.21	132.58	167.184	82.7682
257.603	250.657	221.746	228.776	273.108	294.556	191.649	227.077	198.581	136.34		248.779	274.563	109.729	261.517	211.489	221.415	147.18	159.075	115.046	129.884		19.0804	24.0325	15.496	16.2241	31.9175	29.7954	26.4789	32.1246	22.1501	16.0937		130.494	90.6174	142.022	224.319	186.067	118.777	147.552	107.053	179.207	88.6315
244.561	253.273	226.854	221.226	281.789	308.598	193.81	229.525	199.046	136.718		291.655	293.421	104.986	256.783	211.833	215.234	145.691	160.321	115.927	127.865		16.9444	25.3174	14.5285	17.0061	29.0617	31.5935	25.5705	33.6252	22.1501	16.9236		129.266	91.599	131.752	217.45	182.427	101.324	128.835	100.638	182.245	87.9093
245.399	241.714	226.324	211.213	279.623	312.784	193.269	225.94	205.043	132.464		305.298	299.722	98.3159	252.962	209.968	223.517	141.156	159.286	110.336	129.463		15.3272	24.6902	13.5433	16.7794	24.667	32.1799	25.4798	32.5912	22.0063	18.1086		134.507	94.2486	138.173	212.463	170.254	113.79	126.237	101.595	180.635	102.979
247.62	280.431	224.829	202.324	282.303	316.933	203.662	225.368	212.064	136.271		307.941	303.993	99.4584	252.205	202.129	230.362	139.494	159.289	120.142	129.17		15.3301	21.0019	16.04	18.7073	29.0707	31.1048	26.7349	33.7915	23.989	16.4179		145.122	96.5635	149.475	216.534	181.775	111.703	114.05	89.4553	186.935	107.197
245.584	276.378	230.123	191.338	291.919	310.594	206.606	225.189	206.797	130.085		324.664	314.948	113.968	244.901	202.887	233.778	136.351	168.605	102.331	141.419		14.4391	18.9387	16.4375	17.331	20.6981	30.8509	21.9493	29.7037	23.3609	19.675		149.229	92.8454	168.828	219.903	192.608	126.457	113.166	93.4564	173.21	115.332
271.639	274.487	232.974	185.449	289.901	311.435	220.774	230.949	208.438	125.305		315.751	309.995	129.198	214.295	192.569	237.69	131.125	170.072	95.6609	147.222		13.8857	19.9882	18.1766	18.3176	15.3665	27.6193	24.2845	29.7036	21.4001	19.7672		144.583	102.814	172.185	197.847	193.452	135.324	124.466	98.5076	184.288	119.351
276.012	276.581	237.397	175.289	295.138	308.672	205.306	235.312	203.409	123.037		329.719	303.668	151.236	207.162	190.921	243.843	137.082	166.929	93.6033	150.865		13.5768	19.8279	23.3661	18.6016	13.9477	28.7576	21.5252	32.7712	21.4545	20.8286		146.697	107.176	164.817	194.598	204.378	139.741	120.365	96.8198	182.473	126.882
253.65	283.622	246.149	162.615	296.28	306.261	199.61	229.015	198.439	113.696		340.641	290.782	172.73	206.878	190.639	243.496	138.691	172.997	91.39	162.149		13.0847	21.3651	23.3127	16.4523	8.29964	29.7484	19.3418	31.7613	22.0922	21.6584		146.537	117.342	163.538	190.273	198.397	149.222	132.386	97.6605	177.772	128.545
239.186	280.018	244.72	160.949	301.956	310.58	197.823	233.503	198.059	115.378		319.661	281.352	193.457	193.403	195.455	229.85	134.508	173.924	96.454	159.32		14.4447	20.9837	22.0486	18.1087	0.446372	29.3642	22.2082	33.3261	23.2241	21.7596		159.609	120.136	168.707	195.247	209.89	147.762	134.485	93.126	178.949	134.403
226.677	280.182	250.665	156.703	300.861	309.617	197.55	232.315	194.859	110.753		309.81	274.001	215.119	186.647	189.278	210.48	140.212	181.276	100.406	197.783		13.7637	18.9017	18.3466	17.9286	3.75088	29.4284	20.1616	35.8703	23.3636	25.6092		158.942	122.57	166.425	193.504	215.503	133.705	132.449	110.418	162.032	133.484
217.279	278.088	247.173	146.741	298.028	298.282	200.601	226.192	195.746	104.406		293.342	262.076	230.828	182.426	174.095	207.576	142.983	172.361	106.293	207.617		15.2049	19.2654	15.4177	19.7824	6.22597	27.929	22.1408	36.8321	25.6642	23.8832		166.201	141.899	163.069	195.189	226.261	164.552	130.663	118.188	154.309	133.996
219.055	296.172	247.089	141.177	301.292	293.158	204.38	229.015	194.364	108.681		279.01	255.703	242.295	188.805	168.763	201.603	151.704	163.99	112.305	217.339		16.1757	19.8926	12.4364	18.6545	7.3681	28.3133	20.8785	36.6461	23.739	25.24		169.961	155.368	149.727	192.296	237.928	171.619	123.097	125.621	154.918	133.582
211.028	271.319	244.62	135.815	294.006	280.665	194.238	230.446	186.358	106.571		262.753	255.236	255.376	187	163.596	194.176	160.708	168.463	109.298	223.812		18.0388	19.7247	5.91323	18.5117	14.0729	25.8881	23.9421	35.7333	23.0764	23.6451		171.95	181.683	138.701	185.475	228.067	162.28	131.528	130.675	145.883	129.417
227.459	274.489	236.411	133.128	286.212	274.605	190.074	235.016	181.489	114.828		249.584	258.058	262.285	190.802	152.07	174.789	187.599	162.047	133.442	177.564		19.2936	19.3792	3.04629	18.5124	14.426	24.0828	31.0509	36.5714	29.4689	21.9903		175.127	194.37	127.334	195.748	228.276	150.06	130.454	127.444	157.295	129.282
202.011	277.273	234.117	131.585	284.079	259.44	185.352	230.276	170.608	113.438		238.744	259.32	270.379	205.79	160.916	163.701	196.699	167.321	153.371	173.013		21.4195	17.6977	3.53688	17.9177	11.8459	25.5606	31.517	37.9894	31.0685	22.5105		179.183	191.55	117.659	204.333	227.415	143.754	134.501	131.274	144.892	130.062
200.78	277.803	226.184	128.639	277.688	252.768	187.487	230.825	170.189	106.685		211.109	272.736	269.083	214.986	165.948	162.59	196.976	172.839	162.515	174.771		23.6016	16.8702	12.645	12.147	13.27	26.099	32.4064	35.8725	31.371	21.7096		183.925	192.233	112.034	211.116	221.603	166.634	157.634	139.012	138.675	129.315
194.963	276.598	217.073	131.816	280.526	252.137	184.686	237.228	161.969	100.669		177.734	288.701	255.475	223.398	180.099	160.199	212.212	166.127	170.27	170.424		23.7003	16.7786	19.9917	9.19478	15.5372	24.0361	36.3632	35.3197	31.8776	22.7064		186.317	190.479	103.096	219.307	219.736	155.17	150.392	140.101	129.308	129.989
197.652	279.053	213.934	136.535	278.637	243.125	194.851	234.371	162.259	84.9531		153.92	292.341	242.401	239.612	169.485	167.25	217.071	165.667	170.544	166.003		22.5409	16.3735	23.0431	4.38348	14.1385	23.5343	36.9962	32.5573	32.522	22.4206		174.385	193.926	102.82	217.635	207.975	156.831	152.437	147.501	118.481	124.995
203.488	280.814	208.865	138.715	280.422	240.223	202.815	237.055	165.906	79.8466		128.24	292.074	223.662	250.935	174.446	181.007	212.057	160.432	177.989	130.382		23.9459	16.495	21.3044	0.123719	16.0018	24.5111	39.3906	33.1824	32.0396	18.4064		177.852	189.19	107.478	218.352	205.005	155.696	159.27	132.142	116.63	124.265
219.353	277.031	212.592	151.425	280.943	244.917	196.352	242.433	166.494	71.7993		109.172	297.443	212.012	265.591	191.763	179.42	209.785	162.458	176.125	142.315		21.6003	16.039	22.6203	6.7237	16.0093	23.8782	37.9612	36.1693	28.3697	20.0744		169.452	165.495	102.623	223.233	210.411	137.396	169.056	130.731	114.281	121.792
221.434	292.707	208.663	158.898	279.625	244.05	195.831	243.205	168.847	62.2139		92.7059	304.814	196.126	261.865	199.473	173.82	199.658	163.688	181.601	138.376		20.6473	14.9301	22.9446	9.76924	15.8272	22.2222	39.2615	36.5841	28.6922	18.2777		165.813	155.672	109.338	226.389	192.323	141.166	177.091	129.89	117.239	121.357
214.705	278.503	208.103	166.892	284.26	250.406	190.073	241.496	175.608	63.0711		78.9562	314.356	177.435	263.883	214.643	173.029	193.723	153.647	178.257	127.523		19.0497	15.9523	21.7393	15.3533	17.9163	24.2558	34.5004	41.7514	29.1985	19.697		160.282	136.248	114.442	229.263	196.006	148.658	173.392	145.689	117.831	120.107
222.209	278.591	220.035	175.097	288.318	252.072	196.49	239.56	180.38	51.1398		48.0578	307.044	168.838	264.569	230.644	187.863	168.572	159.664	166.031	137.644		16.132	15.4144	17.8966	19.7479	19.6367	25.1203	29.0913	43.7015	25.1348	19.0507		162.878	130.791	112.849	211.743	192.529	143.621	175.218	145.672	108.723	118.671
220.454	283.588	215.722	184.466	282.269	257.47	197.41	234.525	189.555	49.4337		13.4899	311.975	147.527	256.863	229.359	209.189	162.608	147.546	159.04	131.854		16.5643	17.8817	14.343	25.8505	22.6561	25.1998	25.9107	45.2569	25.7635	15.1511		166.591	129.957	120.18	210.549	191.226	152.034	160.88	151.611	107.487	120.676
222.368	279.065	221.706	188.863	287.22	256.23	198.389	229.981	187.869	47.9882		19.0054	308.97	135.299	246.473	226.771	226.374	162.625	146.994	153.086	128.894		15.6819	19.2918	9.44397	24.7346	21.6174	26.6003	32.0341	48.351	28.1901	18.3705		167.603	120.606	120.033	207.941	197.8	127.892	139.569	150.73	116.594	115.524
221.905	286.954	224.058	193.379	284.787	244.407	203.31	224.511	186.859	55.9554		44.4509	293.242	142.39	229.921	211.27	225.468	150.922	152.529	152.861	146.692		18.3407	17.2494	1.51887	25.0734	18.6996	27.0705	31.7724	48.6238	27.7011	17.591		171.357	119.816	122.445	201.673	200.328	129.195	134.3	149.264	113.587	113.826
221.219	288.63	225.758	188.838	280.651	238.613	195.222	226.628	177.127	67.0371		63.5822	292.588	149.052	209.143	207.163	219.193	149.343	150.251	159.703	185.976		19.0843	16.2403	2.78849	26.0491	17.852	27.8512	29.3038	50.3801	26.6195	18.4009		181.294	114.321	116.243	204.692	221.619	132.08	130.334	141.948	125.518	113.778
221.389	289.387	227.279	189.041	284.094	228.764	187.364	228.893	167.419	70.4593		85.5313	297.461	153.407	196.247	211.561	205.894	150.695	150.945	154.551	247.004		16.6057	15.2493	6.84129	25.6137	17.5088	27.0492	27.1956	49.5474	28.0634	19.1331		182.957	115.143	111.691	202.591	226.511	132.015	123.659	158.225	132.275	114.856
219.61	296.536	226.675	186.024	278.152	216.547	193.681	232.025	166.066	79.649		105.746	301.776	164.594	185.721	204.395	222.359	150.781	149.956	158.421	261.637		20.7313	15.7053	10.7368	26.7882	20.9103	27.8679	29.223	41.5001	29.1767	17.6478		188.15	114.143	115.1	204.145	223.283	129.391	121.233	151.947	140.007	119.591
221.22	275.517	234.299	181.567	277.337	205.169	188.865	233.841	156.502	82.8303		122.596	295.217	177.153	186.514	199.73	210.802	161.01	155.319	153.779	289.097		21.5214	16.8142	17.7339	25.1003	23.4072	27.8504	28.2763	40.0221	32.4999	17.7314		190.978	105.489	110.632	206.501	244.484	98.4839	121.34	147.225	143.962	117.546
233.877	289.227	241.264	180.893	271.368	193.92	193.628	238.683	148.618	88.3697		141.738	295.94	179.368	185.977	188.461	215.433	154.089	151.641	156.176	304.241		23.5028	17.5987	21.4013	23.547	21.398	28.3391	29.9252	35.3409	32.1628	19.4103		201.77	108.332	111.346	200.662	246.906	93.6109	114.693	125.925	148.045	119.788
214.064	304.79	235.153	182.111	271.488	192.548	181.147	243.901	148.955	93.6551		157.035	295.38	174.017	189.063	181.613	209.215	161.245	139.488	158.493	345.145		25.1876	18.1184	23.7849	25.5446	20.7867	28.744	29.8294	33.9262	34.3636	19.3744		199.159	112.503	113.244	211.23	258.26	106.161	115.532	132.316	157.849	119.874
215.594	297.287	236.534	180.342	283.13	186.835	173.642	257.006	142.456	92.6164		192.231	293.671	181.662	198.969	185.773	192.885	166.594	141.186	152.364	366.051		23.1931	15.9493	25.008	22.9105	21.3863	30.6129	31.5574	31.9369	31.7683	21.4675		206.928	117.703	118.188	200.099	266.877	124.916	128.663	117.005	159.045	119.835
209.961	301.045	233.615	186.878	277.815	181.923	166.128	262.937	149.415	94.8676		216.983	291.856	187.927	225.698	177.284	169.642	174.657	122.353	159.269	389.286		22.2023	16.9429	24.7856	22.6855	25.1758	29.9898	28.1176	25.4608	29.6647	18.6497		209.894	123.219	128.608	218.341	265.625	125.16	123.199	130.355	155.979	125.228
204.94	290.552	229.359	187.514	281.248	182.918	158.036	274.25	154.61	91.0708		237.355	280.848	185.681	259.909	179.216	165.497	169.348	104.358	157.221	381.065		22.9086	16.2256	25.9694	21.0876	25.4115	30.8994	23.9961	25.3614	30.8981	17.1652		209.345	125.22	125.006	223.567	267.856	132.043	135.285	129.511	167.078	123.195
202.824	288.38	226.358	192.242	281.063	176.649	163.717	272.781	161.785	86.8638		257.941	213.221	181.678	280.983	175.972	165.674	170.381	94.6257	150.869	363.865		24.7372	19.0436	27.7261	20.1406	23.8561	29.0244	18.9992	22.9162	33.1967	17.4102		207.69	124.011	133.461	219.41	247.821	130.479	137.231	133.154	159.868	127.835
203.41	283.713	216.806	184.707	273.041	172.429	167.357	271.588	161.417	84.693		263.825	176.066	185.752	296.613	174.999	159.953	181.324	87.1951	157.918	322.751		26.5281	21.0738	25.9152	18.3027	22.4922	31.2088	14.6067	21.9973	33.3134	18.3701		211.05	133.428	138.098	224.891	240.058	131.112	141.432	113.176	168.563	124.504
202.713	270.23	219.116	185.516	276.488	161.614	166.805	270.049	157.264	81.1444		280.968	129.276	169.551	307.307	189.26	139.146	191.807	80.1667	158.317	305.829		25.9032	21.0406	29.1072	15.8921	20.8557	31.0625	8.04229	22.3146	32.0049	18.4523		211.446	150.19	153.556	223.137	228.927	120.94	130.944	117.12	166.768	117.296
207.395	265.895	212.209	190.587	270.415	155.469	169.146	270.224	159.578	87.9338		297.599	93.9009	143.474	311.459	188.342	160.116	205.704	63.3388	164.509	294.93		26.8721	21.0406	26.0612	16.78	22.9979	32.3518	3.33089	23.6193	28.3243	18.9577		209.449	171.299	153.204	215.038	221.097	121.542	125.916	118.08	161.491	112.683
212.594	247.634	209.959	187.898	272.103	154.635	161.09	269.897	159.602	82.4363		309.497	50.3627	124.952	319.618	197.648	158.413	213.669	56.0894	183.622	302.511		25.0727	21.6049	28.6785	15.7607	23.3589	31.2227	0.407552	22.2822	32.4269	18.8778		207.063	176.99	147.704	222.203	222.401	127.168	135.346	120.103	164.174	107.509
226.635	261.555	217.419	189.82	268.837	145.228	166.486	267.81	152.859	84.0498		324.246	18.19	106.754	317.248	203.249	157.786	212.586	48.7724	184.263	265.262		24.7892	22.5197	26.5421	12.3477	22.3328	28.2244	7.07338	22.2117	33.8787	18.5147		210.474	198.833	147.704	217.918	206.365	116.807	131.462	121.71	154.06	106.332
234.488	255.72	219.327	185.782	260.431	136.084	170.965	263.331	155.905	87.3933		312.845	24.8661	77.0634	327.52	200.573	160.928	209.728	38.459	187.853	263.12		24.0452	26.3066	27.6714	14.5994	22.3629	20.0961	12.9554	23.7651	37.8265	12.6776		203.951	213.701	150.405	220.353	203.826	112.19	123.478	122.111	155.089	108.04
240.299	254.178	231.618	184.923	257.357	135.527	160.845	261.786	147.672	92.7934		318.924	67.0986	55.4815	305.359	212.114	172.786	202.525	39.2187	181.624	251.724		23.8736	23.7121	27.9874	14.3417	21.0919	11.5126	19.1513	25.0027	36.0173	8.75406		198.806	201.706	144.544	197.745	208.974	121.345	147.017	105.764	147.336	109.911
251.094	253.974	242.996	187.75	248.956	128.189	165.6	255.191	151.004	94.4829		327.098	123.426	30.3771	288.855	206.452	180.491	207.481	36.9024	186.775	245.505		21.5958	24.8595	25.503	15.9396	21.7998	6.09515	23.4486	26.089	33.6992	5.61218		193.907	210.521	155.154	192.588	210.328	119.512	162.519	107.012	145.572	115.223
255.269	246.617	252.209	188.573	247.164	129.581	160.591	260.074	156.328	97.0491		345.144	140.614	5.62023	278.701	216.503	176.906	207.988	30.6679	187.811	239.842		18.0846	25.7402	18.1423	17.6375	22.3647	1.25994	21.21	25.5342	32.7839	0.314141		193.228	217.356	154.072	188.116	227.695	112.623	178.92	106.714	140.943	113.042
258.94	243.857	270.592	194.314	248.185	122.47	154.313	256.622	162.328	103.507		353.181	188.334	18.113	274.292	222.254	190.581	193.76	22.026	178.758	255.727		16.7003	24.4532	15.0653	21.4325	22.1762	6.50125	18.7569	26.0154	32.3684	5.55613		195	218.241	163.296	181.449	234.265	131.5	181.703	116.052	133.615	115.298
267.847	242.039	269.49	197.352	244.565	127.251	151.022	254.543	169.355	105.608		349.516	223.455	36.0998	278.806	213.16	195.353	175.265	18.2419	175.901	278.433		15.424	26.1906	6.79718	22.5753	23.8616	12.0658	23.2878	26.7994	30.8724	9.97775		193.794	201.167	153.227	182.538	241.974	147.709	189.118	117.919	134.883	126.406
265.314	246.336	277.261	191.326	248.401	131.109	146.854	259.484	175.127	98.3264		347	258.186	52.9793	284.839	220.807	192.156	150.838	21.9242	167.057	282.938		13.5908	27.1186	2.55525	22.8385	20.3712	18.6597	21.5843	25.1756	28.8935	15.8254		197.242	196.301	164.497	187.097	249.525	153.149	200.373	115.661	142.747	130.005
267.838	242.711	275.786	188.141	246.255	128.217	151.183	258.084	183.075	105.167		343.566	301.248	62.6231	277.919	214.636	196.603	141.609	25.4022	144.299	274.574		16.2433	26.5773	4.38855	24.3683	21.331	26.4705	23.2133	27.2375	25.0514	21.9466		192.263	192.655	165.084	186.881	247.341	156.267	195.821	124.903	134.48	136.466
254.02	205.484	266.919	191.497	242.981	131.879	153.458	261.047	190.517	113.204		339.664	343.586	80.5652	294.199	206.568	215.418	129.282	25.773	136.466	277.943		16.4487	25.2247	9.3317	26.4766	21.9352	32.2394	23.8761	35.0281	23.5645	24.9354		191.742	174.876	174.998	183.1	259.357	156.156	199.327	117.634	139.102	138.553
249.903	208.474	272.277	195.821	245.132	132.076	151.679	259.16	189.565	112.867		348.148	377.013	76.3218	307.162	208.507	220.845	114.343	27.1553	129.424	288.067		16.0808	22.7013	13.605	23.8359	18.108	34.7985	25.2871	33.9025	20.6535	25.516		191.053	163.266	168.353	186.019	258.182	136.374	194.346	124.089	138.585	132.619
245.439	209.243	262.958	193.786	239.222	127.49	165.942	257.688	194.126	119.841		342.453	413.578	82.5153	315.557	200.488	218.603	100.676	29.0935	131.88	290.036		16.4772	22.1229	16.6169	25.3736	17.133	27.1204	26.4586	34.7206	19.1972	25.6993		196.962	181.11	164.385	187.782	250.096	119.169	187.061	127.532	143.202	127.374
241.213	202.391	253.638	185.802	242.956	129.805	160.17	261.611	191.095	126.079		341.412	414.824	79.5396	321.237	207.695	214.769	91.4902	39.4178	123.861	291.49		16.0499	21.9802	20.4993	26.2896	16.1116	21.4012	23.9867	34.1537	21.0939	26.6733		201.249	174.395	163.297	189.805	240.358	107.752	167.304	135.945	140.209	128.583
246.8	201.479	245.469	178.572	243.826	120.835	153.711	255.241	184.226	134.812		329.872	409.255	87.4105	326.173	196.233	221.663	76.0109	47.9224	123.312	290.723		18.3883	21.293	18.512	26.5801	14.8095	16.0766	24.512	36.1879	21.856	21.4782		206.368	178.12	164.335	194.184	223.86	104.685	143.812	145.066	139.348	122.915
257.818	195.609	236.129	174.007	238.172	120.53	145.692	260.447	182.176	145.25		327.75	402.466	105.311	328.205	181.788	212.813	70.8451	58.5802	120.962	257.591		18.1743	20.8774	18.8553	23.5071	19.6628	10.6591	26.4542	36.677	22.6925	14.2343		211.466	165.708	155.004	197.35	216.812	94.9614	143.812	148.735	146.921	118.646
263.422	194.983	234.013	173.521	239.424	113.106	136.87	261.813	178.443	155.481		327.968	392.68	145.912	320.132	182.051	206.006	68.3454	66.4405	114.895	242.382		17.5699	19.1731	16.7379	24.8751	16.4094	5.34173	29.185	39.6476	23.2063	11.0962		213.426	183.472	158.086	195.755	234.225	116.059	149.45	150.692	135.631	115.351
258.467	189.286	227.416	176.896	234.916	108.332	144.797	256.667	182.193	167.438		330.473	382.228	141.679	308.918	178.64	204.495	67.1997	70.3798	116.759	232.525		21.9145	20.1428	15.0455	27.5608	8.75355	2.74604	31.0273	41.0366	24.5175	7.09957		216.794	181.859	151.636	197.925	224.881	112.289	142.822	147.272	132.605	114.172
260.434	183.83	223.563	183.128	235.63	98.7955	142.833	253.427	178.908	163.727		331.587	377.784	147.499	312.288	180.175	199.267	65.0034	76.6819	114.762	224.662		21.3576	18.7036	13.9969	26.5246	2.69242	10.2464	34.7838	39.3957	26.6744	4.2784		226.824	178.658	155.279	196.643	220.73	100.852	154.265	134.229	144.968	108.316
261.606	172.264	223.958	179.208	237.689	91.7851	145.002	249.03	177.871	159.46		330.804	376.779	159.76	295.093	183.435	183.162	63.8911	90.1203	119.385	250.553		22.5336	18.8158	13.6181	26.9719	3.63664	16.1018	33.4955	31.7944	23.7061	1.11518		229.167	176.395	146.609	196.524	205.85	113.931	150.944	133.535	138.564	105.197
262.081	155.191	210.492	174.182	237.008	92.7872	153.077	249.946	178.5	166.75		315.012	369.756	173.922	274.153	174.73	172.062	73.157	104.213	124.841	240.49		22.1355	19.3761	14.69	29.7156	10.4251	22.7906	33.4384	34.5253	24.2186	4.62217		233.967	183.945	150.038	187.95	201.603	118.639	159.342	125.734	143.551	107.433
258.821	139.463	208.562	178.435	243.305	97.5845	152.845	250.952	173.852	158.132		308.783	368.141	181.621	265.471	183.306	173.518	83.3147	120.074	120.175	244.372		22.196	20.3127	16.2808	27.1982	14.7642	24.7177	31.9385	33.692	27.1262	8.15084		231.12	180.951	155.16	177.051	196.685	127.203	155.846	124.634	139.137	108.755
265.674	135.892	204.15	179.941	241.458	97.6488	161.292	247.807	168.211	150.027		296.831	367.397	197.755	256.585	172.47	156.124	105.153	122.705	120.564	245.776		24.2559	22.2775	15.223	28.3352	22.7062	25.2318	35.674	33.9509	26.2978	11.8926		229.998	193.049	161.679	165.549	203.073	138.01	153.115	118.997	137.067	104.894
264.994	155.165	193.86	183.469	238.708	103.598	168.051	249.706	161.948	140.144		295.991	358.791	201.781	254.591	187.116	151.205	115.06	131.684	118.062	255.938		24.5679	19.9574	18.0054	24.5314	26.399	26.6832	35.706	30.4933	27.4798	12.1315		220.231	198.599	156.44	163.441	208.849	140.211	150.844	107.653	150.468	107.1
276.459	163.63	187.566	191.964	244.13	102.723	179.596	249.354	155.537	133.824		302.312	350.761	200.201	251.553	199.107	135.824	117.435	140.258	124.784	252.204		24.2893	19.7108	18.177	26.5793	38.7588	24.8423	37.4458	35.0144	29.2829	10.7775		212.203	215.277	156.518	153.719	214.055	141.93	144.266	95.1464	142.862	108.083
265.115	160.57	180.567	193.573	242.961	106.216	197.912	250.316	151.903	133.261		308.086	332.345	185.404	253.993	200.772	127.37	126.125	143.417	138.916	261.367		24.8858	19.5494	22.4253	22.9761	44.3336	24.4773	33.3656	33.2889	31.7367	11.123		211.874	221.404	154.682	146.541	208.744	106.866	141.378	93.2481	153.529	102.914
266.441	153.122	183.078	195.3	249.457	105.194	195.765	249.06	147.401	130.216		312.186	287.543	187.33	254.883	201.397	124.078	129.919	149.567	151.08	275.615		21.2943	17.9922	26.0067	20.8273	41.4466	23.8096	31.4705	32.7194	30.8758	13.5516		212.361	214.397	148.949	139.491	205.325	104.046	138.786	94.9454	150.868	102.1
258.843	157.893	186.295	194.621	248.738	105.708	197.338	253.065	148.587	134.268		312.165	216.554	184.157	254.557	198.189	126.646	137.136	151.645	161.357	300.422		21.6582	19.4766	26.4868	21.3529	44.4322	24.1201	29.051	31.7577	27.9943	13.9742		202.722	198.212	148.949	141.889	208.9	110.533	160.931	104.417	139.19	104.465
258.33	157.54	188.949	194.459	243.894	105.705	198.933	259.18	153.964	136.052		311.917	147.653	193.8	280.899	196.609	126.671	153.871	155.077	163.224	257.931		19.7391	19.9198	28.1292	22.6774	47.043	25.7624	28.6268	32.7035	27.1174	14.9019		197.284	190.607	153.6	146.828	219.361	108.624	169.766	106.316	143.314	104.558
261.728	159.227	195.833	203.098	246.01	108.518	198.935	264.304	158.756	133.394		326.879	88.0736	224.811	280.687	199.648	133.627	170.952	160.46	160.177	250.737		19.8977	19.7069	29.4327	19.9455	43.0848	26.2857	29.1227	33.0543	26.4833	15.0057		189.706	181.267	155.49	149.468	221.219	118.474	169.445	110.824	133.266	99.4404
277.78	163.04	189.874	198.396	241.34	109.529	201.452	268.761	169.951	139.679		329.951	25.9675	221.5	290.454	190.328	119.934	190.795	156.465	166.662	239.791		19.6124	18.2751	31.0556	23.0666	47.8147	24.2398	31.127	35.2138	23.8144	14.807		186.454	181.52	155.49	152.221	209.035	120.952	174.316	111.938	137.98	99.3808
274.414	166.31	197.968	202.424	238.56	109.001	196.226	269.647	179.323	146.671		335.098	27.7046	219.988	295.713	199.312	134.364	174.621	159.314	167.646	266.591		17.9932	15.1487	33.5961	20.2663	42.0672	23.8818	31.1941	35.2138	21.662	14.699		185.618	171.92	152.663	154.033	196.712	118.142	174.115	113.463	137.976	91.8852
274.283	142.923	205.319	204.916	234.702	111.177	192.472	274.553	193.452	152.817		324.574	76.4296	223.356	297.483	190.186	137.142	177.824	151.919	172.759	240.727		17.4483	16.2218	32.9349	22.053	43.4358	22.575	33.6819	34.6826	18.4422	15.7073		186.566	160.64	153.947	148.96	189.209	121.701	186.904	118.326	122.626	88.931
249.688	131.211	208.71	205.995	230.681	120.444	192.85	271.524	206.804	150.687		314.256	117.926	214.517	307.993	181.795	148.055	178.731	148.975	168.964	256.564		18.035	16.1663	39.1369	23.096	42.5381	24.7674	30.8647	31.727	20.8805	15.9361		187.056	150.514	149.183	162.841	176.942	118.892	176.56	122.711	122.123	83.1021
242.058	138.408	212.692	206.741	231.857	121.247	184.871	273.988	206.769	144.147		309.764	135.396	231.117	305.771	175.644	166.042	172.88	152.456	162.285	232.299		15.5215	16.6112	36.1832	24.6045	41.2593	27.108	30.5241	38.4326	18.9396	17.1658		185.525	140.742	157.201	182.308	155.246	119.877	177.795	126.214	114.418	78.5623
238.556	145.383	200.814	202.689	226.385	126.142	182.9	275.414	205.811	148.509		301.807	125.337	221.788	305.76	165.719	163.708	167.211	155.496	155.874	211.9		17.1535	16.8048	38.0557	24.6045	43.634	26.617	32.9934	43.3135	22.3566	16.1728		181.426	148.316	159.629	183.055	151.939	122.808	177.372	143.855	111.33	75.2375
238.401	147.264	196.198	204.105	228.266	138.074	187.326	261.356	204.76	155.137		305.246	110.331	207.371	308.977	171.699	166.567	160.895	166.598	150.954	192.3		16.6595	16.0487	39.9464	25.4012	39.9594	28.2599	31.401	50.4208	21.2882	17.5441		180.462	162.626	162.632	180.449	142.759	113.881	160.009	137.196	117.218	73.1899
237.87	150.841	200.749	199.891	228.193	136.334	177.17	220.326	204.453	164.842		304.036	87.7519	179.07	288.386	170.085	168.551	165.368	165.831	146.622	234.113		18.1907	17.7853	37.3868	22.7161	36.6404	29.5659	32.2188	55.6971	24.8924	17.5837		184.064	162.246	163.222	184.098	127.273	100.252	147.632	138.617	114.151	74.1931
232.314	159.065	207.516	189.936	225.339	136.197	167.569	179.728	202.232	167.577		302.315	80.1054	147.035	287.677	154.32	182.943	152.603	162.549	149.379	246.273		19.1378	16.3227	40.3235	23.2235	35.6704	24.9129	34.4637	53.4381	26.7633	17.5326		191.723	155.297	158.289	189.976	130.262	80.6898	137.006	145.672	114.337	76.7114
222.628	165.341	222.662	190.725	228.368	129.229	160.981	136.696	197.007	165.278		306.959	76.3971	142.626	277.955	141.94	189.417	126.619	155.597	141.259	249.405		21.179	18.6813	38.1396	23.788	27.5266	18.6009	32.5893	52.2164	31.1146	17.9434		192.78	159.644	155.925	200.878	147.8	100.763	132.951	145.745	110.299	76.6606
226.337	166.359	228.615	190.018	223.928	127.33	163.578	97.6759	197.083	164.334		292.005	76.5041	134.096	277.005	133.107	191.92	127.365	146.712	144.002	218.395		22.6237	19.7812	38.0174	26.3941	20.1821	12.5052	34.5025	51.9451	33.6303	18.0347		194.248	145.571	153.184	205.368	158.118	99.0619	141.223	151.256	99.9561	83.4197
222.793	168.412	236.176	190.356	228.915	128.681	165.189	55.1104	193.938	160.836		292.327	72.1654	137.702	276.485	129.542	195.001	122.296	148.884	137.694	231.431		20.9404	19.412	38.2212	25.6336	12.7059	7.67883	29.6828	52.6067	33.2345	17.8673		200.37	141.385	157.696	213.279	157.761	87.4542	136.753	150.74	112.82	86.3621
222.302	179.383	247.232	185.251	229.761	124.625	155.016	20.7108	183.837	165.126		299.4	68.8681	146.168	262.422	124.017	200.668	121.56	153.209	133.282	219.02		20.9719	19.3697	33.794	21.6807	5.79817	1.90991	24.7526	50.6663	27.8342	16.1813		197.765	144.479	161.922	200.386	157.446	79.9774	150.985	154.252	103.115	90.9217
223.438	178.927	248.115	191.875	225.215	125.368	152.01	22.5624	186.858	165.048		293.27	66.5892	105.956	270.595	119.31	192.547	117.552	149.804	126.039	221.613		22.9136	17.9093	34.2885	20.2075	2.48287	4.56021	15.5222	44.4489	30.4285	15.9274		203.915	137.086	156.731	186.996	153.176	84.2921	139.957	182.584	107.833	94.3905
218.016	168.979	258.932	198.932	223.651	121.66	147.769	60.4367	180.784	158.505		295.616	63.0982	107.367	288.516	120.627	196.363	113.282	163.288	118.52	236.449		23.5326	15.8241	27.2746	18.6402	8.1779	11.4075	8.12739	39.0045	26.9426	15.6772		201.941	127.719	167.702	193.455	149.066	93.4737	144.737	175.552	111.013	94.5691
215.656	172.041	267.769	196.009	217.793	112.352	136.157	114.28	183.303	142.336		288.604	50.3891	123.293	301.812	114.799	189.595	107.78	167.136	120.639	218.642		25.8203	15.9514	23.1223	18.7496	16.8465	20.9606	0.406478	31.1209	28.5387	13.821		203.119	131.342	170.714	192.738	153.177	101.723	135.376	181.093	100.423	91.2921
223.05	168.558	263.385	199.462	213.352	124.232	138.526	152.692	182.5	129		293.151	49.8709	133.788	308.304	122.824	185.429	87.8136	172.064	124.394	206.751		24.0448	15.237	17.7821	18.8315	22.0848	27.1119	4.76271	23.6571	27.8587	13.5721		199.469	135.323	171.628	192.528	158.836	103.725	140.127	179.584	95.434	89.161
220.554	160.849	264.79	204.118	207.966	122.579	132.026	188.847	183.598	124.011		286.304	42.0174	134.358	306.643	142.366	173.764	73.0117	175.42	117.986	213.807		23.1134	16.1832	8.50957	21.4612	24.1736	29.2881	14.2505	24.2404	25.5257	13.2738		195.94	162.71	173.539	189.926	149.781	127.351	141.286	171.164	99.9493	86.8267
220.378	159.032	255.47	207.95	200.572	135.281	124.951	218.669	189.051	118.984		273.312	30.5477	148.571	312.492	159.516	174.095	65.8846	180.52	125.164	220.256		19.9059	17.1079	1.54625	18.845	28.2534	28.2058	20.0548	28.2237	21.5236	14.0393		196.899	159.612	173.527	185.801	141.174	97.7426	132.473	165.92	91.6057	83.9663
212.936	150.822	248.187	210.49	200.561	141.619	106.391	242.748	192.803	108.699		290.961	24.0024	156.308	315.981	166.836	178.998	55.6301	195.791	125.274	221.328		16.727	17.3123	3.60899	16.5516	24.4358	27.9041	28.5869	27.9621	19.2452	16.2449		198.453	179.451	184.85	183.391	134.217	124.228	126.605	155.777	108.819	80.8757
211.079	183.93	243.708	214.216	195.571	139.215	109.128	251.064	194.848	103.824		294.295	23.0239	157.416	318.9	172.367	176.21	46.9404	200.965	136.649	223.436		20.4221	19.3087	9.89845	17.3121	25.1847	28.5036	30.5977	30.0751	20.7261	15.3127		191.987	188.689	188.176	175.398	140.507	129.982	160.488	157.14	95.4853	76.7411
212.365	175.51	237.94	219.456	187.457	147.796	106.144	252.263	205.996	94.8482		294.977	32.7431	162.808	324.794	193.036	172.713	42.5931	198.857	157.738	235.705		19.6487	19.2171	16.3393	18.2197	26.8936	23.4239	28.1856	29.4804	25.8833	17.0312		193.547	185.436	188.391	189.58	155.527	138.779	147.967	149.179	106.343	75.2503
213.692	174.397	245.709	207.674	183.687	149.724	104.71	248.553	211.431	93.9088		302.789	42.6073	186.265	315.104	195.163	180.228	40.6033	205.531	166.433	234.696		20.1397	19.7367	21.6483	21.3817	23.7338	20.0772	28.2448	31.9357	23.4463	16.1405		184.926	213.228	187.43	192.937	156.269	133.612	159.281	116.358	92.6814	73.4644
219.784	174.456	243.64	206.128	177.739	158.832	108.681	239.549	222.481	92.3461		302.502	58.6544	197.267	301.629	193.455	181.552	52.0364	197.682	174.219	223.121		20.9031	23.3094	26.5609	21.4075	25.4724	13.1777	31.991	36.4901	23.8009	18.6564		184.546	204.365	184.432	194.125	160.632	120.786	149.803	105.102	89.9194	72.1841
222.555	176.75	239.403	212.624	174.088	163.166	116.207	202.522	223.442	95.7683		309.232	84.7962	207.979	284.739	197.875	185.627	68.9124	198.25	171.86	232.887		16.0762	23.0258	27.2115	19.1232	22.2748	4.35327	27.7893	36.8344	21.8602	18.1853		187.412	200.229	172.132	192.05	160.409	138.062	159.548	100.728	91.0353	68.9278
209.121	186.138	242.758	216.816	176.08	155.679	116.966	160.768	226.108	98.9472		303.639	107.261	217.529	273.97	191.824	184.494	77.1678	194.816	168.997	246.751		17.1416	22.8008	24.55	19.0414	21.2186	3.01001	29.4629	35.7835	19.8862	17.0006		188.344	198.328	163.569	186.567	158.382	148.462	166.468	99.6692	92.6884	65.247
216.633	197.757	235.639	223.445	174.596	156.034	121.2	118.718	229.969	98.3091		301.98	136.527	219.966	273.417	185.638	179.54	89.7486	193.93	171.426	226.117		17.2463	22.4535	24.251	15.3033	24.8071	10.6037	33.7014	34.3302	18.4179	16.2553		188.693	173.646	162.233	184.026	156.705	168.75	172.799	108.062	90.8852	64.1543
213.717	194.115	245.966	227.122	180.009	151.913	119.785	80.0788	224.689	106.069		306.864	174.123	219.53	276.456	180.956	195.71	98.122	201.904	163.408	222.763		17.3153	20.4346	21.0893	15.4713	19.982	15.8909	31.086	30.8591	17.8279	15.2506		191.22	174.457	165.823	181.788	158.917	183.414	168.827	113.283	91.5964	63.0471
213.385	208.829	247.537	232.712	180.985	147.805	131.529	45.8414	221.344	115.377		297.708	213.829	226.513	271.81	184.012	185.076	112.344	201.704	160.111	219.635		19.8892	19.0521	22.4122	14.3438	26.8476	22.546	33.2201	34.194	18.8599	15.2929		192.191	161.408	156.068	180.376	164.401	155.883	162.309	118.406	77.6993	59.9184
212.823	165.171	249.556	237.003	178.923	151.644	122.561	29.0852	222.7	118.185		303.316	256.738	218.522	262.781	189.762	194.409	120.608	205.44	149.03	212.683		16.6712	16.2922	23.5451	12.8789	23.9247	29.2015	32.8762	34.1051	18.4634	16.9263		188.39	158.4	150.733	182.264	169.904	155.963	129.717	125.869	81.5508	63.848
208.345	190.645	243.977	241.074	180.22	145.117	126.704	18.9426	217.907	120.48		295.667	286.799	210.604	266.333	170.902	209.769	121.462	206.984	133.324	206.915		17.0017	18.1269	22.7716	13.2983	21.7754	28.8447	36.2129	32.9827	14.4612	15.5367		176.385	156.277	148.296	173.109	160.313	192.047	135.408	142.659	71.9937	62.9517
210.734	203.899	237.498	245.891	177.925	145.206	124.025	8.77529	215.094	120.601		288.775	324.618	231.102	291.209	174.848	213.769	127.344	203.315	118.679	204.64		17.2356	19.4403	22.5961	10.3682	22.5568	29.4006	36.368	31.6453	15.2361	15.9118		173.095	131.939	147.11	161.007	163.918	202.578	128.437	138.162	70.8293	64.1379
208.294	205.003	239.591	256.568	181.417	141.884	121.338	0.991685	208.792	117.253		285.906	346.644	227.574	296.096	179.881	219.857	119.209	202.121	105.393	185.365		14.9919	17.5327	20.8347	12.6154	29.834	28.7198	32.9352	27.733	19.1981	12.3588		168.08	139.757	144.406	154.147	163.633	211.323	125.075	153.531	62.8916	64.9488
206.453	213.272	236.199	265.501	180.117	143.473	117.995	14.3367	206.866	120.249		275.044	355.634	215.698	298.901	172.577	221.893	112.813	192.023	97.8569	187.216		15.7724	17.7036	22.0859	13.3845	32.0448	28.5881	36.0988	28.5242	19.5314	16.3289		165.474	138.257	150.691	145.614	159.482	199.782	111.551	153.671	58.3583	72.6145
212.108	213.936	236.074	267.286	186.121	147.363	119.412	35.943	203.3	118.293		279.481	369.775	196.512	307.78	166.887	225.508	112.552	197.786	92.1736	161.395		14.4185	18.3383	22.8886	13.4845	32.4477	26.7355	35.6499	28.7707	22.2691	15.8787		162.017	146.368	148.195	141.029	154.792	186.646	120.318	152.952	55.613	73.5579
202.59	212.763	244.148	265.926	189.528	154.954	123.169	59.5114	198.664	123.976		279.798	367.742	187.069	303.344	156.147	228.39	110.715	200.287	87.8824	185.669		16.1165	18.9744	23.7201	14.3882	29.2555	26.2325	31.4574	31.3039	23.4678	16.8707		157.503	142.025	147.824	148.051	148.232	151.885	111.659	150.483	50.2766	71.4431
198.379	209.636	235.62	263.942	189.213	162.034	123.937	77.7281	203.34	125.505		283.787	360.654	175.699	297.566	142.74	208.449	120.508	199.268	90.6336	198.23		16.4263	21.0244	24.0525	14.5935	30.7278	25.3795	33.5831	32.238	29.3135	19.4215		154.355	137.004	136.784	150.068	141.754	157.584	127.878	149.363	64.393	69.4433
196.605	201.659	232.243	262.853	193.31	167.613	125.4	84.7479	197.85	131.109		293.723	357.576	164.983	276.314	129.39	215.697	121.398	198.328	83.8672	201.744		15.5781	22.4068	23.8313	12.7221	26.6162	24.9732	32.486	29.436	27.8235	19.3419		148.299	139.669	140.494	161.572	128.222	166.326	115.412	154.154	64.5196	67.5199
186.354	222.927	229.477	266.755	200.458	171.572	128.689	90.2832	199.651	138.017		289.036	352.884	159.12	284.061	107.569	212.644	124.834	199.286	89.7571	211.476		18.8776	25.9384	20.7893	11.1482	29.995	26.0228	36.7982	29.9485	29.3669	19.4519		156.695	131.643	138.397	169.125	112.564	179.604	126.475	143.442	60.692	69.1085
183.533	199.79	230.435	264.869	204.538	178.143	133.358	90.1419	201.55	140.975		297.405	353.475	168.775	271.844	105.741	198.711	138.162	199.1	85.3921	218.077		21.0106	25.012	20.4226	6.83482	29.5376	26.0983	35.6731	31.0518	30.0006	18.1477		163.411	127.233	141.079	173.318	112.094	154.784	122.278	129.444	68.5677	71.0652
178.188	189.085	229.795	265.161	211.94	175.044	139.307	89.8582	202.069	144.216		299.943	341.973	143.012	259.057	93.9484	187.829	135.483	201.462	95.2289	226.48		19.3672	24.3558	20.7319	3.86392	25.7153	24.3699	35.4467	30.4512	29.1622	19.6161		169.54	132.493	142.078	181.296	124.95	152.061	119.44	140.09	80.6221	75.1951
179.038	194.998	231.174	265.743	216.995	176.74	146.09	83.4397	208.552	148.902		290.535	344.782	140.911	268.216	88.8457	182.479	135.912	200.302	102.485	238.639		19.2881	25.0249	20.1663	0.637047	9.45924	25.5854	35.6343	31.3497	26.4782	20.8134		177.486	143.923	138.205	183.264	132.405	154.263	125.922	154.424	93.6964	71.8505
173.201	186.43	232.276	262.722	224.645	181.015	150.288	71.9348	210.664	146.646		299.039	357.388	144.932	281.665	83.9467	173.131	131.587	207.044	102.372	239.971		21.6014	25.7904	20.0578	3.59283	3.67361	25.3952	39.2302	32.7258	27.0894	18.0024		178.302	166.665	126.854	198.307	132.316	155.899	121.42	160.984	97.8244	70.2479
157.011	182.835	230.923	265.195	220.582	187.931	152.769	82.5252	209.896	140.442		289.655	372.143	148.038	289.426	79.4964	172.115	121.578	203.227	109.094	239.417		24.0893	26.4971	18.2062	7.11449	3.78483	25.4627	41.3274	34.251	25.0517	20.0907		184.84	183.449	123.2	204.123	134.775	164.236	105.878	165.735	99.2519	70.8213
151.779	199.496	223.464	268.249	221.654	191.698	157.967	92.5632	208.071	136.514		283.998	397.806	145.886	297.562	84.4611	172.639	114.324	203.656	116.415	217.346		23.7203	26.0856	17.144	11.1703	6.49033	24.9457	44.0759	33.3266	27.9491	18.8816		188.994	195.931	122.385	194.418	136.313	168.381	101.165	152.918	102.856	73.7996
154.128	228.843	228.385	271.398	219.388	184.808	167.042	106.678	204.263	135.75		285.094	409.836	153.459	303.547	88.5981	179.06	106.408	205.25	126.055	201.728		22.9447	25.1223	19.2915	14.5239	13.3836	24.7623	41.9743	36.6984	23.5011	17.8423		186.517	198.834	133.119	193.301	140.485	151.356	92.8751	147.953	90.0712	77.5542
154.133	244.22	235.756	272.575	216.551	192.114	169.87	120.059	205.67	131.626		274.316	406.937	159.556	319.897	89.7016	182.113	98.8729	207.886	138.315	199.172		25.0648	23.2084	19.3036	14.0877	20.6851	23.3821	46.9418	38.6837	25.8576	15.4613		190.915	205.43	128.677	185.32	143.666	145.523	108.573	138.949	93.9451	81.914
161.874	222.79	240.257	268.42	211.7	201.755	170.157	132.651	197.077	124.708		272.585	397.262	171.388	323.485	99.059	180.388	88.4371	207.903	128.419	219.926		23.4153	21.0114	22.3022	14.2394	27.5246	22.9641	41.7616	44.0705	28.1625	16.4729		183.288	218.95	125.39	176.539	145.407	139.212	114.14	134.059	98.8516	76.5355
168.624	229.769	243.238	275.867	213.122	200.249	167.528	147.841	190.753	119.107		260.489	383.463	171.154	330.702	108.74	175.533	72.9348	206.09	131.188	211.944		22.8014	22.3199	28.7295	15.377	33.6346	24.1783	41.0478	45.8406	27.78	18.8229		189.686	223.141	116.283	168.646	144.993	128.376	122.535	133.956	100.317	79.2297
170.187	239.224	239.927	284.931	211.731	207.33	162.106	170.911	186.871	115.391		266.319	374.007	164.357	354.58	119.622	182.551	83.2966	206.014	127.02	207.74		21.6649	22.1555	40.6685	14.8333	34.7759	24.7429	38.0682	45.3268	29.3713	19.5523		184.442	207.8	114.605	178.682	134.017	120.577	135.099	130.387	100.635	72.0004
167.311	243.819	237.404	282.259	218.212	205.884	158.299	191.83	174.833	108.421		276.317	363.417	178.767	348.577	121.42	184.075	86.5501	205.833	127.219	216.454		21.0909	20.7716	43.6475	14.5546	28.5251	23.4502	36.8302	47.6182	27.8361	18.0339		178.835	187.69	116.513	182.231	136.633	132.573	139.022	113.528	92.0169	79.7848
166.907	269.117	236.767	280.52	222.84	205.09	164.056	212.677	169.863	109.801		267.527	341.446	171.785	315.351	118.54	200.39	87.0615	199.749	130.467	212.675		21.1471	19.2435	43.3151	15.3229	32.7798	23.722	32.0514	47.183	29.2986	17.1084		180.64	153.003	133.432	175.481	138.759	152.332	135.324	115.547	94.4297	79.5105
174.528	273.235	231.663	277.765	223.578	209.839	158.197	205.92	162.379	113.129		277.418	331.224	179.95	317.17	123.533	201.661	91.4856	204.189	118.879	211.937		20.1202	17.6005	44.7621	15.9099	26.2787	23.4176	35.555	46.9179	31.0066	15.2039		174.481	117.786	134.137	172.734	140.392	156.054	132.951	112.606	103.901	81.3542
173.114	255.568	237.652	282.913	228.186	204.491	153.698	194.156	160.222	113.517		282.657	317.664	172.305	306.807	133.908	199.628	87.1404	201.886	114.756	203.919		18.1231	19.2685	43.8537	15.8229	19.4159	23.3386	33.0749	43.288	28.5444	17.8564		174.106	104.713	125.23	174.133	141.483	157.915	137.094	123.128	101.337	90.3188
171.538	232.234	232.893	285.653	234.39	208.084	152.579	188.499	155.389	110.706		281.864	315.105	127.612	308.724	135.885	211.778	84.2189	203.977	101.4	201.165		19.5741	18.7404	42.5869	15.8069	7.52406	22.9902	32.8984	39.7398	27.9673	16.7348		174.401	95.6939	120.684	168.597	130.331	158.92	148.37	122.21	107.473	92.2117
167.542	220.495	236.599	284.528	240.313	194.263	147.797	193.618	141.411	103.538		291.329	311.712	77.7798	326.206	153.419	215.121	77.0073	198.985	91.9821	204.926		19.7577	17.4417	41.694	18.2809	2.06774	22.4177	28.996	36.3968	26.2742	19.7707		166.469	88.5311	114.464	169.359	130.206	173.732	146.582	123.381	103.674	91.2512
165.752	231.522	236.38	281.971	248.114	179.396	147.685	204.695	140.961	108.889		283.663	315.704	39.6784	343.43	151.46	214.354	77.2624	197.655	95.214	210.858		22.5238	10.7148	39.7426	18.3152	9.10191	20.9796	29.0246	29.5885	22.1142	17.4695		171.433	83.9409	114.389	176.594	124.648	164.284	130.015	123.122	102.559	99.4719
161.086	230.983	238.058	275.649	251.736	177.973	148.746	213.504	136.235	106.611		287.077	331.809	2.32473	343.573	145.235	222.556	87.4861	206.865	90.3781	209.065		21.8697	5.42373	33.3055	15.8976	15.8513	21.7776	33.6283	26.4139	24.3684	15.9388		165.088	83.8595	127.216	183.752	114.727	163.332	129.235	131.4	107.869	97.0589
157.443	223.906	251.533	272.048	261.129	173.001	154.875	214.122	137.864	108.993		280.096	344.568	23.1747	320.642	135.053	219.939	80.8801	209.121	92.5445	215.196		22.1341	1.05946	21.2638	16.4026	21.6675	22.9827	35.198	24.0515	23.1424	13.674		168.533	88.9859	128.748	180.457	111.104	171.155	119.645	126.386	106.478	100.835
161.571	212.676	249.974	273.287	255.775	173.284	154.696	215.355	149.08	114.135		275.165	358.252	64.1072	315.412	135.104	221.361	87.9717	213.165	90.041	210.209		23.0866	1.69185	18.2761	19.57	27.1275	22.8301	33.7752	20.8841	25.9087	15.9064		167.375	95.9484	128.748	177.597	105.395	154.686	105.994	116.965	111.803	98.7403
158.247	187.596	253.811	268.81	254.634	173.305	145.178	219.325	148.374	110.417		280.408	365.774	84.3003	334.145	142.859	213.481	88.9772	219.83	90.0113	214.301		21.6456	5.13099	18.4813	19.4102	33.071	24.474	32.0535	20.2363	22.8049	16.7495		164.264	105.159	124.767	187.93	113.271	121.541	121.638	114.394	114.355	99.2603
154.664	175.816	257.446	269.719	261.913	160.717	143.726	222.871	155.238	115.214		271.459	356.624	115.761	320.662	136.3	210.127	89.0854	220.466	105.781	222.691		21.9188	10.1007	18.2324	18.2497	41.508	25.3516	26.6079	24.4724	20.8436	19.3404		166.302	109.23	133.765	196.21	111.247	132.511	121.2	116.176	108.825	100.991
162.375	175.106	252.291	262.663	262.738	159.815	135.369	233.708	158.803	115.646		274.319	344.753	126.184	343.872	127.004	214.884	113.261	226.631	107.169	219.629		22.0241	16.4961	21.7986	19.6836	36.5437	27.1175	27.4	32.0661	22.9989	16.6145		164.186	106.34	144.999	200.094	109.433	117.32	120.2	116.352	116.709	96.7493
162.782	174.511	257.471	257.232	262.672	150.354	133.329	236.602	160.177	117.367		268.61	332.183	104.207	350.684	129.978	202.648	120.835	218.5	115.195	222.435		21.5407	21.5833	21.2861	20.7248	33.9643	30.4756	29.3246	29.6082	23.4123	17.6416		164.465	108.526	148.525	208.157	126.831	132.422	106.293	114.317	114.682	93.2504
174.536	183.856	255.8	257.179	265.643	152.828	134.917	233.236	172.95	123.242		262.468	331.383	87.319	334.256	110.642	195.48	137.135	221.48	116.669	221.549		17.8621	22.2911	21.3748	19.4385	33.2452	29.9291	26.9128	29.5144	23.8726	15.3832		171.457	101.117	154.604	207.426	132.633	108.154	114.19	103.152	124.463	99.1736
177.782	176.92	255.875	262.207	266.303	152.957	131.981	234.969	170.656	126.298		269.229	322.74	77.5123	295.533	104.663	197.338	147.452	224.032	114.976	222.359		15.1926	21.9613	21.3956	21.6623	26.6361	31.138	25.8235	29.5347	24.9637	14.0481		170.26	95.4746	159.306	203.264	137.83	114.004	113.622	103.146	129.91	94.8518
180.857	193.496	251.353	262.76	273.594	144.685	133.994	233.453	174.266	139.22		271.23	309.051	69.5837	286.957	97.1862	194.628	146.986	217.491	115.845	231.756		16.1847	21.1064	21.0022	21.2145	30.3127	30.0706	25.2939	31.052	21.1989	15.0385		175.23	88.7154	157.275	199.072	146.23	108.184	108.028	87.0101	121.897	95.4409
198.152	198.82	237.598	266.35	271.117	142.708	129.392	234.136	172.14	142.3		274.165	300.039	66.2818	297.587	103.813	202.797	149.578	216.382	114.722	228.799		16.1857	19.9236	21.9738	21.6189	29.2898	29.5384	26.309	31.1516	23.5099	15.5378		171.386	94.2071	159.966	187.979	151.059	136.513	118.947	82.761	129.229	95.311
199.364	203.01	237.087	263.815	275.372	135.679	124.807	241.895	163.611	141.548		281.862	283.572	63.0898	299.458	99.2639	203.56	140.013	211.61	118.158	223.688		14.9154	22.0812	21.1859	19.778	25.8939	24.6442	30.8073	29.4888	22.0064	11.1166		176.217	94.7407	168.144	194.628	151.486	144.265	133.004	70.8033	136.158	94.2463
208.63	208.77	229.765	270.03	275.178	128.148	123.458	243.483	164.29	146.95		285.566	279.116	63.6875	310.768	95.5529	204.822	146.071	205.639	122.522	222.129		13.131	17.8202	24.8643	18.6844	27.6034	17.7341	32.3479	31.5528	26.5629	8.08261		177.824	117.27	160.759	187.674	143.325	169.288	127.669	61.0272	143.269	90.9345
220.524	221.84	224.685	271.955	272.067	122.599	128.099	249.502	161.833	144.425		293.697	257.91	68.3116	332.339	97.2995	210.739	151.371	202.854	118.207	212.108		11.2508	13.0089	25.3753	19.7878	19.9658	8.46282	33.082	35.8526	27.5065	2.53825		178.215	131.693	164.239	192.894	141.51	140.471	128.775	60.5203	152.652	89.6764
218.954	215.329	224.028	274.268	272.474	115.418	134.703	250.509	159.019	143.963		291.228	238.994	102.224	321.384	86.5632	208.449	136.844	194.019	121.528	220.253		14.3117	7.28152	23.1785	19.3395	20.8586	2.37844	32.5069	34.9624	29.2395	0.48647		178.127	133.192	160.893	194.558	151.953	147.858	128.028	84.0292	155.103	83.7629
225.854	221.918	220.43	280.844	270.693	111.023	132.687	252.172	159.035	140.431		293.038	217.628	115.288	301.444	78.7121	223.548	138.384	200.311	118.331	213.996		13.4646	2.39899	24.4946	17.9303	18.2845	4.21438	32.4017	35.2413	34.2673	4.50329		183.695	140.352	159.58	193.864	150.593	124.86	132.034	98.3154	165.798	84.8083
221.062	224.554	220.402	279.022	270.478	101.001	130.409	262.493	155.168	138.938		284.644	189.457	115.053	310.297	86.8491	229.084	128.702	196.565	131.37	200.76		13.6056	1.52151	24.4687	11.4254	19.6453	9.07947	33.2005	35.9301	35.583	9.21061		180.431	152.073	159.776	198.23	159.126	128.018	121.918	113.266	168.043	77.3359
230.185	228.615	219.083	277.369	271.902	95.4642	136.661	266.674	148.457	135.589		275.739	165.113	124.349	314.731	95.1334	230.801	125.122	189.646	146.7	167.776		15.4212	7.85002	25.1886	6.00811	21.5149	15.4198	34.0497	36.2122	36.2068	13.5494		187.047	155.228	163.027	203.02	161.395	154.57	111.173	117.048	172.778	76.2938
233.384	210.406	217.688	279.146	266.672	93.7883	134.501	269.197	145.985	129.134		279.331	140.48	138.768	323.424	101.63	237.253	119.696	188.537	151.76	165.61		14.5536	9.57054	25.6174	1.8617	17.4402	23.4604	29.658	41.1673	38.0998	17.6604		183.006	159.341	152.93	208.435	153.08	164.312	113.648	129.33	182.047	74.1022
220.003	207.592	220.156	278.151	267.2	85.2167	133.32	270.359	143.104	128.983		274.504	118.149	157.788	297.262	102.061	233.534	116.474	185.21	163.596	188.407		15.2931	11.7508	25.6933	5.04701	11.2984	28.3871	30.5773	46.9706	37.3636	21.3901		189.67	149.811	147.307	220.913	154.06	136.017	105.464	134.891	175.201	73.9083
226.543	201.424	220.886	276.154	258.962	88.8753	135.251	269.371	144.105	136.711		266.838	106.156	170.619	290.881	99.9761	237.026	128.62	187.198	164.981	194.423		16.3696	17.3311	24.0598	9.06582	8.16599	28.466	30.1095	49.1848	40.5108	22.4644		185.757	154.837	136.216	215.323	161.978	121.792	102.56	144.82	172.155	77.4656
228.655	189.556	225.692	274.573	257.008	92.4116	136.543	265.701	141.88	139.196		262.976	89.3893	203.45	278.745	116.862	234.179	129.514	185.028	162.981	200.725		17.2645	17.968	16.7209	12.1457	2.21107	27.3756	29.3672	47.7616	39.3018	21.3162		190.215	131.981	140.716	217.414	173.532	107.218	109.725	146.142	165.538	81.8025
230.86	169.266	225.03	275.129	257.832	97.0464	132.809	264.824	142.208	146.71		254.385	99.4461	201.629	255.344	135.081	232.119	127.46	187.868	167.167	211.856		17.1325	19.5516	12.9328	15.0849	3.22633	24.6246	29.3991	44.612	39.1801	20.7248		193.352	116.378	139.805	208.596	186.693	145.809	126.616	136.857	158.876	84.0785
234.996	182.237	220.252	273.453	255.644	99.2133	135.815	268.583	141.68	148.879		255.302	113.168	175.624	248.408	161.265	229.256	128.252	197.392	159.82	209.316		14.2892	17.8317	7.97721	21.3237	5.56882	19.5542	30.2509	41.5384	36.6394	20.4936		197.407	114.251	139.801	209.205	187.295	139.117	130.652	110.113	156.827	92.5291
228.521	170.51	216.556	270.462	258.242	103.489	134.907	268.174	140.703	153.115		251.172	126.455	185.649	282.887	210.512	208.477	121.049	191.102	161.008	201.821		16.9386	17.4778	2.97628	24.0879	8.50386	14.9919	32.1104	48.8416	31.7155	22.7297		196.652	111.567	149.927	215.705	188.397	145.832	130.585	97.7816	147.814	99.7582
240.54	163.012	207.908	275.635	253.017	112.628	136.069	264.643	147.018	158.791		265.024	152.588	192.414	272.786	212.379	203.854	131.344	192.392	143.566	211.296		16.3427	18.5598	0.826533	22.0361	14.7016	8.55171	33.4469	50.2066	34.0627	23.2939		203.752	101.271	145.424	211.091	181.576	151.56	134.319	84.9033	144.715	104.313
239.171	159.375	205.487	276.473	246.895	118.73	128.387	260.577	152.784	165.043		273.938	179.877	202.69	280.438	198.698	201.93	141.849	199.866	133.57	213.253		14.3918	18.1741	5.22214	22.0673	19.2043	1.37084	37.6119	52.2538	34.0069	22.7273		200.131	101.572	145.249	207.261	185.096	148.292	144.966	98.4258	135.294	107.347
245.914	149.248	207.838	275.171	246.244	123.007	127.818	259.927	158.742	176.337		278.375	201.704	201.634	293.804	196.095	200.824	153.836	196.376	134.957	235.255		17.1023	19.3605	8.57181	21.6682	23.5404	6.34408	37.8271	47.711	32.3457	22.4293		205.443	98.5891	157.854	204.269	208.86	155.403	150.249	102.913	125.452	111.889
254.701	135.717	206.11	271.248	242.695	126.825	130.968	266.866	165.315	178.856		290.889	213.368	209.571	302.357	182.464	200.371	160.605	197.896	126.265	216.991		17.8771	18.9813	14.0912	18.4414	20.1163	13.916	35.3247	41.9977	33.4931	17.7983		200.947	107.244	160.877	193.497	225.87	150.992	143.028	117.139	126.604	118.647
249.553	132.709	201.121	272.114	246.849	122.337	132.577	267.918	171.458	176.335		293.175	219.112	224.579	299.525	179.642	188.788	154.662	193.319	124.973	219.239		15.2731	18.9109	17.3301	21.4472	20.593	19.4123	34.2219	38.9389	32.2227	13.0169		198.451	99.8121	169.439	201.972	221.407	170.932	135.91	117.846	120.162	116.245
250.993	141.562	198.1	272.321	247.369	119.88	138.566	270.817	176.583	177.154		295.488	229.159	222.77	295.628	160.344	194.34	155.739	197.273	125.232	218.17		16.5631	19.5681	19.3492	21.475	17.4913	23.1031	33.5434	45.7067	35.071	11.8457		192.76	99.5643	170.736	188.736	217.905	174.292	122.427	123.62	115.715	119.161
240.896	149.4	195.051	270.098	244.235	113.856	138.573	272.026	175.871	170.954		297.131	227.249	250.633	296.482	149.715	197.398	155.399	195.043	116.413	206.661		18.9136	18.0828	20.0425	22.4874	14.2805	29.1588	31.9948	49.2584	38.5925	7.77935		195.977	109.068	165.778	195.543	221.849	171.309	104.144	124.11	114.642	117.323
237.496	138.401	188.368	266.559	248.359	109.937	135.459	263.635	179.554	179.769		282.798	225.364	311.972	290.135	125.735	200.572	158.621	183.95	118.796	202.803		20.5388	17.6515	19.1507	20.1929	17.7963	29.5058	32.7754	47.7654	36.2931	1.24549		197.746	114.343	176.204	207.492	224.981	175.924	95.9623	127.632	104.596	114.32
239.625	129.618	183.895	268.037	249.489	108.06	143.58	264.517	178.784	179.613		276.609	211.654	316.038	254.693	88.0511	212.087	166.675	189.503	110.135	209.751		18.2032	17.9504	20.6208	19.2677	17.9485	28.8634	30.6664	40.3183	39.098	5.78523		195.394	109.644	177.714	195.739	219.481	181.223	100.659	132.204	111.968	110.552
219.701	113.302	165.381	268.156	253.75	109.303	144.273	265.265	174.227	182.695		255.314	184.527	325.051	249.729	80.61	219.808	157.276	186.589	112.242	203.191		20.7977	18.5582	16.5441	21.0913	18.4371	29.6677	31.2113	37.2908	39.2526	11.6291		191.527	124.264	174.708	199.95	222.172	180.437	91.2864	142.211	103.737	108.635
220.366	113.025	144.472	267.708	259.523	102.229	152.342	266.816	172.751	180.911		247.3	162.281	331.603	240.897	84.4445	219.25	154.901	179.301	110.287	191.189		20.7653	18.2508	8.74973	20.0839	17.6907	28.181	26.5032	36.3626	37.4422	17.1143		191.738	129.898	182.289	200.648	222.846	158.482	87.1171	124.616	103.127	109.154
213.253	100.791	125.231	263.877	252.894	95.4263	157.2	269.022	169.281	178.935		228.364	142.009	362.101	224.18	84.7687	218.269	146.292	181.95	101.656	149.624		17.7084	18.4989	3.71585	18.8568	14.7927	30.5375	24.8245	37.7652	40.4167	20.5325		181.558	150.234	182.712	204.997	213.946	149.064	78.7488	112.024	105.573	108.62
203.368	99.4832	105.879	264.763	257.724	90.3768	160.11	267.394	168.507	189.44		202.855	133.45	353.043	210.591	88.9224	212.584	146.63	181.584	92.8824	154.77		16.4701	20.3828	2.02549	18.9362	17.5312	28.383	29.7796	40.0492	38.1594	22.2879		178.075	151.251	178.545	218.581	212.617	159.487	102.469	112.293	97.2319	105.508
206.29	90.0119	110.297	266.46	256.636	90.8569	165.014	268.756	167.954	198.023		196.505	125.249	338.303	214.745	99.1722	220.021	152.461	185.811	81.8593	138.09		19.2429	21.2784	5.93857	17.9079	17.0097	27.8354	29.28	42.0351	30.7668	21.1578		176.611	164.679	176.466	209.287	213.665	142.303	109.524	101.405	100.972	108.177
203.257	74.3911	110.256	265.903	262.737	86.6619	163.926	276.509	165.612	206.026		182.916	119.115	325.06	213.926	99.2783	214.134	148.399	179.168	70.0685	158.255		18.4332	20.6212	11.549	17.0992	18.4398	26.1145	35.4171	33.6761	18.7486	21.5693		176.947	174.621	178.062	223.847	213.257	136.417	114.397	112.475	99.0525	104.042
215.815	85.5272	117.451	278.926	268.239	90.0063	171.614	272.481	169.784	217.531		170.068	120.169	306.056	247.269	86.9706	211.7	151.638	175.9	64.3622	158.518		20.2129	19.7256	16.6278	17.8466	20.5848	27.8075	35.4931	25.8557	5.72635	21.7513		169.618	173.82	176.981	219.51	213.52	107.761	113.049	119.182	97.6616	107.812
221.582	119.17	122.998	292.363	267.446	97.1081	170.756	275.302	165.811	208.077		174.143	117.105	256.002	256.657	94.7676	212.299	158.269	173.314	56.079	171.824		20.9271	20.8098	23.3075	18.7746	17.9983	29.0128	30.8684	26.0029	3.78224	17.7383		164.616	170.318	166.932	204.608	209.178	118.726	118.821	124.823	100.956	104.987
215.083	126.312	128.925	291.936	271.279	99.7955	155.366	275.097	166.267	208.458		179.67	133.025	259.89	251.572	84.2454	204.862	153.158	165.885	52.1735	173.964		22.8685	19.03	26.3276	21.6272	19.6666	31.7577	31.4549	31.103	5.08646	16.5484		163.802	191.785	153.669	214.162	215.055	126.322	110.895	125.966	92.0614	106.107
222.407	128.897	144.407	297.056	268.428	100.448	153.472	277.825	166.31	209.461		180.195	147.88	259.492	259.781	79.7045	200.51	161.534	167.586	45.0331	176.847		21.2985	16.6578	25.3193	18.2638	18.1269	30.8706	34.0082	30.2932	12.9486	16.1006		156.296	177.515	167.327	213.961	221.559	133.659	116.072	131.091	98.7279	107.423
217.028	131.64	161.93	296.809	268.776	106.393	154.391	280.965	163.926	207.259		167.668	162.266	262.92	269.089	81.6345	195.298	158.605	166.142	35.917	190.208		20.814	16.2564	21.1747	19.1528	19.3762	30.1354	35.237	28.1745	20.2609	16.1908		149.352	192.515	152.729	213.858	218.374	125.343	109.161	135.963	97.0466	100.378
225.31	141.236	160.702	303.475	276.443	113.415	154.573	285.145	158.323	202.282		164.967	181.673	258.305	264.166	76.5775	185.361	164.984	165.725	30.1291	213.201		24.3301	19.0455	20.22	18.826	20.6531	27.7197	35.6234	27.7296	28.5759	16.6284		150.447	177.061	153.399	209.294	223.83	123.074	114.383	143.364	96.1388	98.7836
230.782	143.025	170.438	307.508	274.878	121.235	159.865	290.931	150.586	185.948		178.421	193.341	279.32	268.206	81.1084	182.352	179.666	171.365	26.5219	201.235		23.8383	17.2676	17.7125	19.866	20.0827	27.39	33.498	27.6598	33.2305	14.8105		151.315	175.738	145.786	196.8	213.333	105.212	106.123	144.479	100.926	94.9225
224.032	148.582	152.106	304.137	283.612	120.911	154.603	292.423	140.261	176.909		177.494	207.642	296.968	280.647	73.6042	172.78	178.513	173.897	29.6858	204.797		21.6409	16.372	16.1488	18.4286	18.2358	28.2554	33.7565	26.2458	32.4788	15.9576		152.748	167.52	142.216	200.822	223.654	100.997	103.227	149.966	95.1857	89.3953
221.373	149.586	130.943	310.119	279.794	126.297	145.563	293.385	138.433	166.917		198.044	208.324	339.152	312.601	79.3879	171.313	189.606	184.745	30.6891	178.269		21.4562	16.9644	18.7129	18.3984	16.4907	28.961	31.0257	27.4393	31.7695	16.459		147.387	155.791	140.62	189.971	240.813	111.476	102.02	141.204	95.4969	89.6213
196.979	138.214	105.876	298.85	277.338	126.166	134.982	302.792	140.441	161.998		211.331	210.84	353.653	281.017	93.4173	163.982	189.375	186.852	31.804	186.724		18.3034	18.2217	18.9351	19.9698	14.0425	26.4603	32.7294	29.0456	28.306	15.3225		140.046	148.714	143.205	190.289	242.982	144.291	105.367	152.948	93.7953	84.6828
175.826	95.2936	90.6104	289.257	279.737	125.857	128.356	304.989	143.868	166.739		220.031	242.234	354.887	275.876	123.466	161.577	186.29	188.972	37.2631	179.422		16.9765	19.0942	15.6039	20.7795	15.634	25.4324	36.9916	29.9413	30.7128	15.4053		137.081	155.687	143.213	204.396	253.719	157.994	117.203	151.368	90.6564	88.2702
175.878	94.2293	70.4838	286.998	274.498	127.702	135.072	307.338	139.649	161.469		218.636	269.759	351.174	290.501	135.288	164.854	186.813	201.773	40.5708	182.254		17.0634	20.3564	16.1915	20.2802	13.2787	23.9499	36.8253	26.9715	33.0718	15.5994		133.188	138.354	145.11	198.152	256.96	152.961	134.828	152.501	99.0838	90.458
170.346	103.984	55.8497	280.149	281.369	116.31	137.55	309.676	133.385	155.577		217.273	289.75	347.995	284.856	143.453	159.129	182.493	198.93	53.3581	209.901		16.3064	21.0389	15.7021	24.122	14.1626	24.4835	34.4561	31.6497	33.4113	14.3702		141.33	128.776	148.163	200.785	251.791	144.74	150.491	144.217	95.2323	95.2456
163.431	112.805	48.9365	277.177	273.817	119.25	132.838	310.858	131.285	151.255		233.194	295.526	337.205	281.887	155.053	165.91	184.889	197.666	58.1777	215.833		17.1822	21.6319	18.3697	23.4581	12.6317	25.7816	40.8591	34.5353	31.2903	12.9274		146.312	104.619	159.225	198.536	255.057	150.657	160.052	143.195	98.0182	102.627
145.696	127.119	55.261	280.293	272.555	122.379	129.05	312.705	121.881	145.905		248.515	294.919	330.471	284.198	164.273	170.084	186.206	196.206	60.2624	209.77		17.3724	20.51	18.9457	23.9664	12.6467	24.7088	43.1506	33.308	25.7488	11.6193		150.019	106.7	159.277	200.255	246.599	166.08	153.144	150.343	91.9036	107.468
139.442	133.901	66.3852	277.036	274.165	125.086	121.786	309.896	132.557	150.177		245.468	298.408	308.142	280.239	179.796	175.033	168.713	187.716	72.2261	212.497		20.2775	22.5079	22.8592	23.3409	13.7801	24.7063	39.2293	33.7806	23.1794	9.63431		161.154	100.418	168.09	208.988	254.618	178.515	160.863	139.803	95.0861	109.29
134.434	135.417	75.7347	279.05	270.114	133.515	120.285	303.286	143.131	150.888		247.334	296.875	285.594	258.403	193.779	178.79	165.871	186.271	74.2398	218.968		20.6475	20.8994	26.6532	22.2655	15.4404	24.2146	39.587	35.1981	17.245	8.10965		163.821	104.705	168.09	204.656	245.319	190.225	159.912	143.96	98.5066	116.064
125.044	147.607	95.2363	267.631	275.088	136.008	127.532	297.772	140.666	152.896		227.788	309.112	247.388	216.267	210.358	178.785	155.405	181.753	76.732	224.782		18.9108	20.307	24.5468	24.0836	16.6184	25.9683	39.7429	41.1241	9.10019	9.4882		178.477	105.413	167.628	215.852	225.828	170.596	162.756	149.607	95.3734	118.326
139.32	151.225	113.376	261.89	276.692	141.17	134.989	296.05	120.084	153.822		220.832	311.48	246.436	209.651	212.606	192.268	164.297	178.783	77.0664	220.377		19.4983	20.293	24.1096	19.9566	17.8644	26.3068	42.2498	40.3882	4.93105	9.62822		187.073	107.071	168.61	210.69	226.534	140.911	158.027	137.639	101.083	122.935
155.216	166.037	131.029	258.871	275.012	137.811	145.32	299.915	107.319	148.717		215.559	285.754	245.951	204.091	189.417	186.065	159.751	180.206	71.3715	217.934		20.4815	16.8084	24.9896	21.3285	16.9903	26.3729	38.0885	39.6848	2.68256	10.0485		193.138	104.877	166.368	199.422	222.881	120.443	147.424	129.337	103.551	124.72
159.234	165.307	149.351	249.937	275.958	141.34	150.314	302.998	109.353	157.762		212.915	261.793	230.418	217.798	190.64	182.869	170.478	169.191	72.7942	208.543		18.0176	12.9416	25.4634	19.3634	18.9468	25.7529	42.9997	40.6157	9.66041	10.8255		201.191	104.296	162.186	202.157	223.718	111.932	133.277	131.098	98.1015	122.032
170.635	167.549	167.021	245.329	275.363	154.49	156.228	311.845	112.063	150.277		227.724	256.764	230.905	214.312	193.395	184.45	176.345	173.811	66.6433	187.07		18.345	6.092	26.4183	15.0731	20.2114	25.2182	41.9875	35.4585	16.7165	10.4064		201.317	112.445	154.218	196.827	220.289	119.713	108.93	148.037	100.994	119.615
175.477	162.029	174.469	238.944	281.913	150.632	155.796	316.983	114.398	150.369		232.385	251.583	252.057	213.694	182.738	179.182	172.325	177.778	68.8163	197.146		16.5788	0.853408	25.0957	16.6382	24.1036	24.3507	34.7014	32.1463	24.1632	11.7175		205.55	108.437	145.532	201.137	220.828	117.718	107.466	152.949	98.34	116.954
184.187	150.474	184.202	218.715	283.27	150.947	160.442	320.461	123.296	158.157		242.891	256.483	282.972	203.455	177.782	187.323	172.597	177.3	73.2853	203.13		14.8861	4.63633	28.3109	12.0186	23.3496	23.3844	39.1588	34.941	25.6233	12.6374		212.151	109.441	147.332	193.169	226.92	102.336	117.842	144.832	104.442	118.314
182.267	152.702	182.666	204.708	279.665	158.677	162.009	327.849	111.685	162.89		251.518	259.197	294.837	213.895	163.634	188.336	176.409	180.127	67.6134	206.43		14.0974	11.4525	26.8287	7.99457	19.9863	24.1595	38.6605	34.941	29.6445	12.6204		209.001	147.528	151.12	183.253	218.179	95.6887	119.518	146.207	102.567	117.648
179.645	166.692	191.732	192.069	275.545	158.886	166.465	340.288	105.21	168.705		248.123	268.023	299.836	223.947	159.156	195.486	174.059	176.667	67.8675	215.146		15.0183	13.3952	25.3347	4.42882	22.534	25.1418	37.3199	37.375	27.9201	14.1281		212.384	149.699	153.057	182.249	223.473	92.5798	126.283	147.245	97.8735	119.475
181.162	166.029	189.55	196.516	269.105	166.883	165.419	345.777	116.903	168.224		260.456	264.54	296.709	251.918	148.084	196.443	177.617	178.745	63.142	214.696		15.7584	17.0947	27.4849	1.01632	21.8249	22.9652	34.8987	31.8531	31.4652	12.4013		201.068	166.92	159.949	171.193	231.098	109.37	125.592	139.498	105.191	116.887
177.024	170.938	194.034	193.158	266.665	165.482	158.506	346.156	133.252	165.973		260.621	266.302	293.258	262.818	152.974	182.752	166.003	178.283	64.0458	209.174		14.4415	21.6094	27.0119	0.140967	23.684	20.5549	34.0377	31.8689	34.5705	13.0612		203.349	173.71	162.223	169.925	224.914	107.06	129.358	141.07	101.556	117.464
177.668	169.343	194.532	193.383	259.854	168.774	149.666	348.653	145.239	171.67		260.336	274.92	281.456	244.153	169.613	187.732	184.059	180.248	70.5167	210.401		14.4142	22.9911	31.094	4.25302	21.4064	19.5906	34.6366	31.4169	32.2379	13.3476		206.48	171.728	175.885	167.86	224.051	127.141	129.076	146.41	98.583	111.033
178.357	186.749	194.494	197.947	253.304	162.818	152.757	347.618	143.738	163.727		261.432	284.607	307.669	261.247	177.479	195.687	171.653	187.572	72.274	213.089		14.8341	23.3273	30.1202	6.6407	20.3168	19.4344	27.5834	29.1998	37.2417	11.9715		202.899	165.212	187.715	164.541	218.723	129.462	126.841	145.988	101.127	111.314
169.551	183.757	194.696	197.958	242.741	157.904	151.487	337.757	145.129	173.042		253.876	287.775	317.527	283.549	184.046	195.716	172.364	195.478	66.8518	223.982		15.1613	21.1046	22.5174	9.47779	19.8187	19.5588	28.4383	30.1125	36.4104	15.029		205.633	167.248	186.788	170.655	226.749	131.178	134.738	133.246	94.0523	115.117
174.514	185.688	198.288	200.208	236.833	168.675	154.879	329.563	145.762	177.287		254.395	291.488	296.163	311.699	202.505	201.819	179.398	200.752	70.3207	217.147		17.4703	16.3734	17.8527	12.5886	19.8593	19.323	30.2742	29.5387	35.9654	14.4401		201.184	170.106	178.795	169.455	236.418	137.484	138.059	135.912	98.8984	115.132
174.539	194.761	197.019	209.671	233.844	174.64	153.647	326.467	146.738	177.116		226.302	286.911	254.638	348.276	211.252	192.897	172.811	210.225	67.2431	216.364		18.1671	12.2321	9.48149	12.6847	24.2187	22.4729	25.2081	26.6331	36.0748	17.3272		202.94	164.571	179.625	188.006	235.526	131.828	136.524	139.675	97.7323	110.577
181.021	186.17	192.554	225.457	236.187	182.503	153.002	313.022	153.118	171.984		212.096	287.883	243.52	350.817	216.693	193.75	172.352	213.979	63.7215	209.966		20.6077	6.36323	3.86323	11.546	27.1947	23.5276	24.6004	25.2665	33.2852	17.8971		203.573	128.82	171.519	194.231	244.37	151.985	118.137	137.76	91.4325	112.669
187.994	175.121	188.48	244.031	239.933	201.197	155.504	310.667	151.481	166.746		214.488	285.549	243.938	361.305	219.694	196.576	181.466	216.193	60.0718	202.118		20.9139	2.55751	3.49431	10.9364	24.0077	22.6248	26.5206	23.3084	33.0085	16.5214		205.639	128.236	165.459	197.454	233.257	155.677	110.703	147.558	96.2833	105.427
194	185.837	191.337	247.675	240.819	213.397	156.34	308.325	140.676	172.111		209.167	294.967	263.904	350.378	221.647	195.84	183.114	212.472	76.7578	198.406		20.8674	0.996218	9.73328	11.9062	28.1309	24.1194	26.0768	21.6014	26.9942	17.9454		214.903	110.937	158.309	213.233	222.496	147.955	113.399	147.1	88.3208	107.299
206.534	187.274	183.036	256.492	242.704	228.78	163.161	311.865	138.792	169.516		220.737	299.492	260.242	347.012	220.538	208.042	192.209	218.283	77.8169	197.173		24.2762	5.34371	16.7899	11.8558	28.0086	28.6955	26.7378	18.7516	25.4421	20.5666		218.465	105.909	147.535	217.901	226.084	139.127	116.442	145.41	88.4177	106.143
211.444	192.6	179.107	255.362	246.523	244.6	163.328	312.844	132.246	168.936		220.252	292.776	264.129	379.668	205.907	206.538	175.67	222.557	80.5942	192.716		23.5583	10.2015	25.0175	13.53	31.3333	28.8827	27.9017	19.6281	24.2588	21.3839		222.206	107.956	143.436	223.328	231.489	120.607	112.468	147.309	95.0448	107.8
214.261	183.716	178.586	256.294	253.95	261.318	148.635	318.308	128.709	179.054		229.646	290.093	249.383	347.994	198.97	204.26	189.716	217.195	88.454	188.594		24.7216	14.6484	27.9094	13.1303	35.4658	30.5356	25.5683	19.1904	21.3119	24.2381		225.952	115.045	139.015	228.319	240.221	120.519	122.393	133.826	87.9885	107.334
215.438	180.075	181.18	258.623	254.89	277.023	141.214	323.171	131.017	179.122		240.253	285.847	235.183	344.567	205.225	208.484	184.303	212.207	92.1623	173.474		25.4853	19.1452	25.3685	12.7463	35.4394	30.508	19.1281	19.4172	20.4096	22.7235		228.465	119.177	130.487	228.332	241.432	109.966	153.898	140.582	98.1672	104.849
207.82	172.92	179.562	257.872	260.819	286.671	140.606	326.277	131.852	182.748		233.606	303.896	282.523	343.859	197.341	194.308	175.558	208.349	92.7123	146.333		22.3422	18.9068	24.8319	13.2264	36.6076	30.7718	12.7105	18.8516	17.7354	23.4442		233.924	115.847	146.072	236.185	228.581	101.007	162.787	131.666	99.35	101.086
214.312	167.873	184.431	255.04	265.863	290.522	139.767	327.86	136.707	180.64		258.903	316.232	295.65	318.309	201.346	201.373	178.775	196.254	94.7161	141.666		22.0426	19.8036	24.945	13.6206	33.2392	31.2335	6.84358	18.0776	19.1669	22.7428		236.708	132.422	143.846	221.757	228.682	119.496	156.293	125.696	107.167	101.82
213.995	174.546	191.049	249.129	262.771	289.454	137.922	333.161	130.429	178.22		273.505	327.468	305.359	310.677	198.633	198.679	189.805	190.028	97.5874	154.61		19.7604	21.041	19.7942	14.7647	30.4297	28.2307	4.57571	18.7521	23.2029	23.4194		240.884	121.104	149.509	217.253	210.906	99.3086	168.108	128.526	120.791	102.467
213.77	182.104	190.028	239.876	258.066	282.271	130.22	331.104	131.58	181.489		272.373	336.417	323.332	294.948	190.843	203.875	188.743	183.083	101.055	173.012		18.3687	20.6816	11.3431	14.9101	32.3406	28.325	1.19404	18.436	23.964	24.2478		240.883	119.394	153.681	209.412	219.376	103.613	160.107	118.872	126.353	108.965
207.312	181.824	192.681	236.044	256.305	278.422	129.982	326.761	133.864	177.99		284.656	338.078	303.842	282.496	189.871	204.533	191.373	185.39	93.4147	163.717		17.7497	19.6297	7.12771	17.4676	27.8732	27.6273	6.7951	22.4367	26.3352	23.8771		241.962	127.062	159.267	194.162	224.019	103.904	164.998	121.397	140.681	112.224
189.393	184.548	202.133	231.574	251.381	273.99	124.097	317.962	129.168	179.608		285.604	346.399	300.941	255.19	178.274	196.911	189.468	182.673	98.3679	176.474		14.4352	22.14	1.16739	19.0078	29.3902	27.0336	16.7274	22.1238	23.8848	20.1809		240.108	142.797	168.234	189.503	220.356	119.565	161.854	118.867	143.8	108.075
179.966	181.972	206.061	233.908	250.869	271.317	128.737	311.143	127.527	180.713		292.982	346.816	312.893	225.224	177.39	206.589	193.732	179.664	97.5765	182.457		15.4867	22.8927	3.90313	18.7719	27.3021	26.4199	21.0823	22.1408	25.9869	21.9719		238.74	154.629	159.927	181.971	214.237	131.984	167.945	109.361	140.161	111.468
172.043	192.241	207.102	231.79	248.495	270.198	137.848	308.099	121.028	178.233		294.995	342.506	312.258	202.189	185.597	199.502	186.018	180.558	92.7625	194.418		14.9158	24.341	8.6233	22.1885	23.2306	24.5888	22.5895	22.8003	26.1867	19.3174		243.238	164.995	155.798	176.92	200.268	124.57	163.571	111.129	146.621	113.578
171.729	204.448	205.073	230.431	259.484	267.994	142.116	302.752	111.688	176.332		291.243	341.9	323.401	178.548	168.113	199.545	188.942	174.592	105.616	194.67		13.4932	22.5422	16.161	23.7081	27.0284	24.587	23.3405	24.8866	26.9764	19.856		240.81	179.573	171.643	177.114	192.574	149.014	137.196	91.9666	140.905	112.838
169.211	209.814	203.993	234.874	261.316	267.113	131.909	303.788	110.047	171.282		288.453	329.575	279.841	149.727	162.94	214.001	189.947	175.245	107.923	214.111		15.4933	22.7393	20.018	25.5069	24.6363	25.0874	25.9562	26.9766	27.2206	18.4471		239.531	180.218	169.52	169.781	192.841	150.885	129.276	98.8188	135.046	114.318
155.462	213.819	203.348	242.265	258.865	275.717	125.445	296.898	103.825	177.756		273.856	322.801	267.325	143.166	152.333	203.108	186.559	180.79	113.431	212.876		13.9597	22.9419	23.982	24.7118	26.8474	23.5394	26.0282	32.1241	24.5622	18.2707		239.739	171.722	173.444	190.989	200.026	155.954	126.94	94.5846	124.571	112.443
146.113	218.203	206.769	243.263	260.668	278.23	122.809	297.268	103.464	180.158		272.195	317.439	257.409	138.807	148.998	200.979	188.321	181.17	113.493	191.33		13.9426	20.774	23.5568	24.4536	29.6392	24.8109	29.0775	33.5513	21.4632	17.4895		240.188	183.051	184.4	197.702	211.211	162.981	118.019	95.3814	116.311	113.369
141.848	220.093	207.102	247.443	258.717	281.017	124.215	296.878	97.9875	190.778		282.206	310.1	241.23	131.361	153.81	186.457	180.245	192.147	128.24	194.289		15.7995	20.2064	23.2398	24.1661	26.753	23.7229	30.5991	37.6781	23.11	17.443		239.634	190.248	184.231	202.034	207.706	145.166	131.498	96.5402	111.374	108.245
143.136	212.258	202.262	249.511	254.836	277.664	121.262	300.689	95.8713	202.23		262.647	305.641	246.152	120.401	155.065	183.033	174.725	192.491	137.407	212.242		16.9769	20.196	23.3151	21.6967	30.1358	23.985	24.9955	39.3713	22.3634	17.298		242.481	185.584	189.683	208.923	205.277	137.792	135.266	100.762	102.11	100.131
156.424	209.188	200.906	253.7	257.614	280.997	126.338	302.48	96.2945	213.552		254.332	297.86	247.718	127.599	172.349	183.151	171.516	192.517	135.264	213.931		16.9108	18.4274	23.8013	20.0926	28.1245	21.8552	15.3008	39.6728	27.8327	17.7626		245.351	173.014	188.384	209.991	198.586	146.173	147.367	100.329	100.974	104.031
163.668	217.259	200.243	250.285	254.093	281.751	129.553	300.768	99.1494	217.199		250.121	302.776	268.902	127.235	179.746	164.493	163.597	186.303	133.822	223.195		15.8464	17.2892	21.6251	20.3286	29.5204	24.0069	6.05907	38.3276	26.3696	18.4284		241.338	160.682	190.823	213.964	190.77	125.086	152.662	106.265	104.846	100.417
171.933	207.421	196.04	251.595	251.967	282.919	129.055	297.62	112.081	221.628		244.566	315.796	274.634	126.057	175.56	166.337	158.4	184.379	142.372	220.897		16.8741	16.0832	24.1266	19.814	32.6579	25.9489	1.3109	38.678	25.3435	18.6834		240.999	146.293	196.705	215.35	201.591	134.369	149.721	111.691	104.015	97.5827
182.388	207.316	186.286	251.088	246.299	288.094	130.293	297.224	120.071	225.874		244.145	323.804	275.681	117.1	179.888	160.801	152.525	187.658	133.407	221.969		17.3321	17.6597	22.1731	17.0765	28.2485	25.0615	7.24944	39.898	23.4032	19.797		241.05	132.584	191.369	210.118	205.952	109.298	142.657	122.928	107.157	99.456
195.365	211.191	186.628	250.24	238.564	277.173	135.43	288.545	121.914	230.741		250.51	335.607	280.472	96.2313	182.091	150.314	149.522	188.107	127.334	211.652		16.0319	18.4806	22.4951	17.7872	30.0863	26.6858	21.2786	41.371	28.1713	22.2098		243.365	139.641	190.975	214.145	209.443	120.316	142.8	122.207	106.603	101.444
202.826	218.272	185.28	242.442	230.787	276.256	139.69	283.24	123.889	221.429		269.163	344.949	280.098	80.6124	187.514	153.948	151.772	190.864	120.812	209.638		15.1133	15.8943	23.5655	17.427	30.5522	26.6515	27.8262	36.2811	33.5021	20.5563		239.843	133.694	181.304	194.467	200.977	105.51	137.987	135.684	113.08	105.675
210.226	218.59	181.754	239.443	226.31	272.473	137.675	277.81	123.631	224.232		270.942	342.454	285.028	63.9708	187.31	146.339	127.731	196.061	124.788	215.399		14.1776	19.5088	23.7394	11.0343	32.5519	25.5697	41.6294	34.4701	33.7744	21.3374		236.731	134.678	172.004	187.309	192.483	129.934	135.311	136.143	109.744	100.519
219.5	220.885	185.473	234.076	225.109	265.467	139.095	270.761	124.867	211.743		272.845	335.235	308.994	53.886	183.725	149.423	127.246	185.293	110.609	187.661		14.3568	20.1651	25.0838	7.38833	34.8224	19.9998	47.7698	32.5533	36.5873	20.6821		236.174	130.139	173.821	184.305	189.595	137.67	132.2	135.271	106.836	104.31
226.894	221.175	189.522	226.593	229.922	267.431	148.912	263.433	126.509	200.68		290.261	329.996	307.02	54.3563	173.498	154.891	126.282	186.426	102.117	177.434		13.415	16.0079	24.3557	5.05882	35.0031	13.8272	49.3087	28.6059	38.5968	20.3755		232.318	134.749	163.219	173.035	188.415	147.849	111.667	129.89	111.512	105.442
225.782	221.305	185.337	220.186	225.703	263.877	154.572	258.913	126.927	192.414		295.958	327.754	307.892	48.2597	159.872	146.695	118.737	186.991	109.802	182.578		13.5229	11.693	24.8829	0.881556	40.4586	6.86755	50.8622	29.4875	33.7524	19.3032		226.649	137.282	164.499	173.056	187.088	135.735	109.453	126.468	107.262	104.941
232.023	209.482	180.315	215.237	223.997	258.611	158.71	240.873	133.941	189.8		303.23	319.148	274.062	50.5537	159.366	150.62	116.476	189.546	109.456	176.659		14.1186	7.47483	27.4615	3.29192	37.9716	1.11561	44.7856	29.623	37.202	15.1376		225.962	140.263	141.417	162.027	194.173	131.957	129.341	132.212	106.731	107.471
239.943	221.908	180.217	207.643	223.417	257.263	167.236	215.75	130.228	183.175		313.503	306.88	266.723	52.1579	155.875	146.91	110.178	188.405	104.277	181.272		13.1915	2.6787	24.2435	10.04	38.7192	7.07682	45.8992	29.4016	37.6112	14.0759		213.311	139.643	103.81	161.447	190.337	149.75	121.976	135.349	107.499	107.922
241.49	223.081	185.061	196.656	221.27	251.872	170.881	189.605	127.038	186.817		317.703	307.755	248.852	72.9588	141.675	155.221	109.923	182.202	105.969	188.408		15.4791	0.107317	26.3036	12.9116	41.2505	10.7761	45.1212	27.9414	42.1213	10.9436		211.768	136.783	68.0002	162.944	183.485	171.544	114.888	134.864	101.241	102.948
224.775	229.007	181.731	186.565	224.828	261.65	180.192	174.164	127.385	184.499		318.103	300.875	243.238	81.124	127.427	161.2	110.423	181.637	109.845	204.589		17.2366	3.3115	24.9223	19.7165	39.1296	18.3985	40.0182	29.8387	40.3427	8.54214		203.26	130.697	24.8008	150.554	182.327	165.189	114.28	140.547	108.652	104.373
250.142	224.721	180.909	179.92	228.205	249.682	186.29	160.508	123.125	186.402		304.961	302.025	227.787	82.5835	111.022	162.602	108.974	173.664	117.357	204.059		19.9409	8.56862	23.6713	24.2191	40.366	26.1042	38.8949	32.7973	39.5656	9.07439		192.069	122.734	0.229698	150.674	175.78	157.923	140.745	135.272	96.906	100.358
246.17	224.964	178.07	176.455	227.954	244.382	199.507	137.511	120.205	178.745		305.724	296.997	229.42	95.0422	103.294	173.951	127.374	170.191	120.086	206.823		22.0275	14.628	24.2212	20.6223	39.7359	29.5192	33.267	33.8732	40.3198	8.41555		197.567	128.963	34.5126	161.582	174.156	127.859	141.412	121.886	92.8348	102.204
230.188	221.826	183.355	173.43	230.05	252.512	203.696	118.83	118.659	176.361		300.38	291.269	196.882	99.2692	100.725	175.887	134.914	172.636	130.264	216.207		20.2433	19.9231	22.9664	21.1498	39.5527	27.7629	38.6343	32.8973	38.1567	10.9451		194.017	114.23	57.7431	163.929	167.196	129.192	138.334	134.28	95.7643	95.6724
213.562	222.943	180.209	169.563	224.885	246.796	200.727	99.4304	117.24	173.769		294.128	292.244	189.762	105.533	97.9652	175.755	137.998	169.341	143.57	217.833		21.7538	19.2483	23.2438	20.5789	39.877	26.1426	37.7571	33.4574	35.8225	9.88852		190.815	104.571	90.087	169.422	164.905	129.545	143.508	123.824	91.2033	96.5457
210.944	229.74	185.823	165.512	228.386	246.348	196.343	77.1178	117.876	162.859		303.34	294.845	192.817	121.37	93.8636	180.498	145.639	165.101	142.963	198.69		21.5223	14.5726	23.0571	21.6525	33.9411	18.3555	34.1342	41.4711	41.9888	11.958		189.947	101.774	114.544	161.471	175.378	128.139	135.618	134.53	90.7799	91.8194
196.441	232.758	189.751	167.065	233.392	250.542	188.957	67.3346	105.726	157.768		315.891	308.592	221.249	138.871	77.1146	182.195	151.892	160.903	149.043	214.271		21.8308	10.3545	19.582	22.5167	39.8884	12.4246	36.0394	41.9595	39.6386	14.9678		180.858	96.6316	113.682	187.003	166.127	141.21	100.896	130.68	87.1303	88.5462
176.649	236.539	192.903	168.262	231.26	248.079	181.374	70.4332	106.718	157.922		318.333	322.652	238.734	147.631	57.8861	191.103	168.918	166.683	148.456	217.664		22.7951	6.6156	20.3095	21.4154	40.5351	6.60221	36.3266	43.007	42.3543	14.9716		178.72	103.752	113.682	195.984	158.145	112.958	95.1146	131.478	79.2771	85.8121
167.108	237.284	201.03	173.678	224.337	252.891	174.436	66.3279	103.435	147.875		321.806	314.666	259.145	161.447	64.1707	184.566	178.748	172.443	143.127	221.855		21.3496	3.53001	17.7078	22.3287	37.8936	2.8704	40.4714	44.2139	42.796	11.8101		156.684	112.509	113.682	198.733	154.99	123.259	104.608	133.17	85.4188	87.6977
179.777	234.686	202.388	178.09	217.403	248.519	167.773	55.9059	108.725	142.179		333.18	314.817	261.49	200.432	72.9112	179.101	187.444	171.949	144.264	214.848		19.0504	0.664879	19.9011	19.0795	44.4175	3.84438	38.5548	40.3495	41.2369	10.987		139.945	124.238	106.619	212.617	149.067	134.552	98.8057	122.735	77.9043	82.59
153.734	234.271	199.781	183.661	211.101	258.579	163.22	52.7932	120.783	139.623		339.888	308.588	273.154	234.865	85.8717	174.845	194.653	178.302	143.54	216.755		16.0222	6.20594	20.1937	17.5826	42.2567	11.3907	42.1353	37.4174	41.8206	6.66818		129.716	147.518	104.796	213.61	148.808	155.235	83.637	123.742	87.081	83.9039
149.546	241.036	196.892	182.412	206.327	268.722	154.316	55.443	130.843	144.636		339.525	315.865	280.008	243.37	89.195	167.363	183.487	174.445	151.39	214.561		12.834	10.9512	18.0351	18.9602	44.2797	17.4346	43.6523	36.817	39.3221	3.35882		101.601	130.476	104.796	210.072	145.368	165.527	97.922	136.801	96.7815	82.3159
153.508	245.353	184.74	179.252	197.441	263.581	151.486	61.6142	144.047	144.406		353.849	323.507	288.15	256.254	94.2978	163.169	183.503	173.103	151.035	203.059		14.0324	15.8674	17.6358	18.7925	46.6666	20.6473	40.4691	35.6187	35.5014	1.89602		86.9332	142.85	115.893	213.546	149.586	178.314	102.631	126.341	96.7914	85.8169
162.695	244.749	187.544	182.547	195.417	271.842	151.568	66.7396	152.569	144.532		359.12	330.114	291.301	265.456	91.6139	155.408	181.728	172.832	143.341	206.116		14.9253	20.6149	17.6873	20.4971	45.5978	24.8037	40.4691	36.91	37.6772	5.48551		65.9266	151.222	115.893	214.849	149.51	181.852	107.676	133.927	99.5508	89.5368
150.586	235.574	181.564	182.679	186.442	277.01	151.723	71.7694	161.241	152.531		352.722	334.543	293.206	286.394	94.1543	152.552	184.911	171.597	144.339	203.684		16.0813	19.6057	18.371	17.8157	50.7816	24.8306	40.4691	30.2775	31.0171	8.58832		49.4407	163.227	126.999	225.35	136.525	192.687	107.371	132.922	101.543	95.0019
145.481	232.021	178.425	181.153	183.486	277.135	151.678	76.6413	168.564	150.779		341.543	330.881	266.067	290.926	103.362	151.127	190.768	179.299	140.126	189.613		15.9282	20.5429	19.4806	16.9515	45.6422	23.8569	40.757	28.6654	34.6586	12.5533		43.8436	159.343	134.401	212.306	148.774	208.843	120.277	137.514	105.433	100.086
145.681	216.592	179.499	176.562	183.489	278.355	147.403	69.8298	167.398	148.747		330.452	318.879	245.805	303.323	119.534	143.708	181.676	178.353	138.504	188.686		16.4085	20.7994	17.6869	16.7316	45.7744	23.7144	41.3324	32.3602	30.5269	17.4142		36.5674	160.337	133.382	197.282	151.038	208.542	130.063	157.59	110.352	102.098
136.515	210.732	175.334	175.693	187.14	278.246	140.693	69.1644	175.67	151.291		333.992	318.528	230.533	292.387	135.266	144.251	175.655	175.315	141.714	184.488		17.0612	20.5998	18.5768	16.5888	45.0492	26.2966	37.351	32.4837	27.105	15.7391		53.5756	144.993	124.12	191.309	153.189	181.619	131.34	159.129	104.787	103.478
130.831	206.897	176.672	180.29	187.059	277.265	133.433	76.0657	169.242	153.21		324.954	315.295	224.281	263.749	146.355	139.742	170.071	173.89	140.068	186.224		17.5714	22.0906	20.1441	18.3506	39.0054	25.0496	38.4923	35.5774	30.1545	17.3316		70.8649	140.738	113.48	182.056	155.06	176.619	134.053	157.947	105.802	111.071
127.553	205.334	176.368	178.325	192.908	245.456	126.602	79.7228	167.949	160.156		325.77	316.66	213.627	247.108	143.711	142.707	160.563	168.461	153.853	187.412		17.7012	21.0184	23.0123	19.2995	44.1432	24.9258	39.6635	36.9892	25.9917	17.1369		82.9715	126.538	122.901	187.381	157.381	183.413	129.919	156.274	99.0555	110.376
131.207	193.765	176.233	177.931	194.477	212.312	119.133	93.5688	162.216	159.768		327.963	308.207	203.623	253.674	158.546	154.486	161.868	174.137	148.982	187.42		21.6677	21.0368	23.3316	19.2995	39.6908	23.865	43.3851	34.5636	31.5382	15.4891		89.152	137.486	122.901	185.293	163.112	181.54	112.286	151.596	93.5314	113.288
131.779	196.137	182.394	178.284	200.253	184.826	114.995	99.8854	155.32	161.213		321.318	316.581	200.053	267.731	157.165	161.686	153.675	182.717	146.609	200.399		20.0413	21.8905	23.2438	19.4671	40.8172	23.6029	39.9	36.5543	31.8333	13.6147		91.9839	134.642	101.619	180.261	162.403	166.583	114.265	151.665	89.5885	119.864
131.572	205.756	176.531	177.488	200.688	193.104	106.41	103.112	156.081	163.917		328.08	311.761	190.976	309.285	196.642	171.394	152.294	181.853	147.723	202.259		21.0648	21.6317	25.0114	21.0618	42.9695	23.3436	39.9	34.5504	29.4968	13.3463		102.458	126.63	80.1599	184.653	166.421	185.884	103.226	156.334	84.334	120.511
141.846	213.326	181.482	176.634	212.934	196.661	100.435	110.622	150.527	161.776		335.472	296.767	192.352	296.363	197.632	174.061	148.839	182.817	141.103	214.114		21.5624	19.8588	24.6437	21.1354	36.9167	23.1018	41.1167	32.8476	31.5457	13.3891		110.433	113.206	56.6522	185.107	174.626	170.974	106.305	158.864	84.4825	121.919
139.767	214.614	183.333	175.367	210.601	191.034	97.2966	120.818	155.691	170.53		336.672	298.549	195.996	324.208	198.303	190.012	145.29	177.174	141.259	216.928		20.5862	18.965	24.1957	21.1354	38.0596	21.8553	42.7643	37.5313	27.4782	13.8685		118.19	116.118	38.413	192.238	164.497	154.769	108.718	165.292	80.0163	120.493
143.193	220.454	187.496	181.155	211.998	169.556	100.502	137.156	165.601	180.154		352.599	296.467	236.085	326.338	202.651	195.02	153.353	171.937	143.627	209.099		22.5575	18.9641	26.6596	21.7629	34.4623	22.9109	45.1008	35.0064	30.4338	10.4473		128.898	111.596	17.2766	196.049	179.635	162.001	133.32	141.524	79.2121	122.878
142.71	222.203	189.614	184.719	214.662	139.071	101.877	148.729	165.69	185.687		350.902	289.757	252.401	316.367	196.36	197.448	151.305	172.885	150.25	203.777		21.9005	19.0016	27.1545	22.5564	34.6134	20.5996	46.3174	34.4248	27.8992	10.8263		125.065	118.033	6.08959	199.235	182.685	169.626	150.855	144.723	78.6797	119.255
143.586	230.573	197.954	180.933	216.772	116.216	100.077	156.321	173.756	193.372		352.097	279.925	263.504	321.07	194.75	210.731	149.013	173.179	154.027	203.348		22.7784	17.5353	24.2805	21.4224	33.2918	20.3427	46.3335	33.8859	29.1025	9.85818		124.359	114.214	28.0779	203.945	189.168	167.491	147.747	146.616	75.1806	114.711
140.636	232.734	208.785	179.401	212.874	118.192	96.0273	159.716	174.611	189.288		347.657	262.564	278.773	327.003	203.014	216.611	155.596	180.98	137.109	207.736		22.8596	17.956	22.0513	22.5115	26.7135	20.361	43.6338	34.0451	28.8598	10.0897		126.498	105.614	50.6391	203.61	189.951	143.163	178.317	145.616	74.1724	113.84
133.571	243.575	211.324	180.289	213.692	118.821	101.238	154.981	180.651	192.655		340.163	265.483	280.038	330.01	198.177	210.275	153.605	180.009	134.701	210.257		19.9551	16.8505	23.1641	21.7198	30.8384	19.2567	36.0175	37.0711	26.5561	13.2694		139.588	103.604	76.4861	196.583	180.916	154.22	185.033	146.841	69.4918	114.851
127.428	246.655	211.053	174.719	218.936	118.269	96.1659	151.095	189.17	192.21		325.231	251.45	282.786	328.268	209.96	203.791	155.974	175.193	136.407	213.445		23.7946	16.1259	22.9939	17.66	25.9278	19.9788	43.2981	41.2993	23.8169	16.5468		154.074	105.415	78.5171	200.463	181.86	162.097	184.338	144.508	65.1457	109.978
128.512	238.702	219.671	175.014	222.365	79.8945	95.0335	158.406	186.115	187.789		310.705	235.847	295.464	299.211	183.474	195.871	156.963	176.43	137.772	207.244		22.5762	15.664	23.6679	11.8918	21.7492	19.5519	42.8147	42.2643	18.8425	16.0311		159.496	101.195	82.5719	201.217	174.409	141.702	192.114	144.282	63.9187	108.235
119.971	235.907	220.665	172.503	216.988	49.7942	93.1739	160.547	189.569	190.631		294.248	231.215	293.76	314.876	188.866	199.589	157.282	177.461	144.342	199.451		22.7256	17.3279	25.0427	8.70263	23.5481	20.7232	42.0141	44.5498	12.5459	16.8631		171.547	95.5018	82.988	204.886	172.624	159.589	176.692	134.565	63.6314	106.402
124.256	234.977	223.167	171.611	219.663	41.2129	91.9801	169.781	185.11	182.517		285.344	210.238	295.314	287.256	192.195	187.39	160.321	182.992	147.675	189.596		21.4744	17.9526	25.6886	4.41312	22.8708	21.1499	38.6265	43.0846	6.91882	17.3322		170.57	94.2884	88.7002	190.064	176.894	162.138	192.008	120.62	64.3943	105.249
122.672	231.968	222.12	171.679	220.115	45.3661	86.6063	175.82	175.825	171.911		272.765	207.969	252.839	284.371	183.068	174.766	151.098	196.401	150.315	189.581		17.3319	20.042	26.2824	0.4756	23.849	21.5053	34.6592	41.9472	1.33236	18.9159		167.668	85.091	98.5532	189.694	149.254	187.212	171.406	127.919	61.3101	102.491
126.693	232.868	223.057	171.102	218.37	48.5125	90.0527	179.925	172.776	163.892		261.793	205.65	233.552	278.574	179.414	165.917	156.328	196.392	149.724	184.082		20.2045	21.382	26.2716	6.38365	24.3228	20.5315	33.1604	41.927	0.708965	19.1065		172.017	81.0726	89.82	187.143	150.068	193.396	155.906	120.904	61.5163	101.6
126.64	220.449	220.069	168.663	222.485	59.198	94.2447	187.211	161.719	155.208		257.82	200.698	226.36	295.979	179.77	146.593	153.406	193.363	153.141	180.776		19.4401	21.3143	27.0704	9.42306	29.7427	19.0819	33.9134	41.4608	10.2031	21.3558		174.223	77.8993	81.2258	177.966	145.819	179.976	165.736	125.449	63.1331	97.681
130.286	217.455	218.707	168.609	230.851	70.3181	98.9025	195.939	154.624	153.895		253.88	205.853	210.459	290.972	174.753	129.366	145.649	189.07	159.86	174.69		18.5624	21.9078	27.6882	13.3533	31.1913	20.188	30.228	41.7364	17.2946	21.0276		171.603	78.7292	86.2598	170.388	146.561	184.017	142.662	126.457	64.2889	97.3458
136.519	209.572	223.639	167.504	235.314	90.7049	92.6565	204.304	143.268	146.165		256.185	204.766	203.534	295.619	177.465	116.423	147.641	191.362	160.479	171.296		18.6745	21.3049	26.7616	16.0229	29.9068	22.7446	32.207	38.1082	27.2478	20.9158		167.254	81.0135	85.1107	173.691	165.784	173.81	136.536	130.679	70.6059	90.9447
145.024	203.116	226.796	173.616	233.099	113.028	95.5143	209.76	132.154	142.295		271.915	202.46	204.653	292.494	168.2	103.807	144.248	192.117	158.542	177.674		15.6938	23.2314	24.7717	16.1365	37.1839	24.5025	26.1744	35.6049	28.3623	17.8671		172.147	105.907	88.5415	179.114	167.128	172.78	139.012	144.865	75.5889	88.2055
146.849	192.087	226.04	174.102	232.699	128.851	96.2333	211.224	131.794	137.405		272.637	194.575	196.531	281.623	166.828	99.1652	140.594	191.46	156.101	187.751		15.9051	23.5234	27.5813	16.2368	38.5699	24.5911	25.9608	34.7321	27.5078	15.1698		172.731	106.38	89.2561	177.173	171.48	173.042	142.951	148.241	74.2993	84.9356
157.434	196.858	226.742	182.457	233.11	138.615	99.9551	214.507	135.023	126.643		277.573	188.727	190.617	271.108	170.781	84.0467	132.9	194.84	144.559	192.999		14.2863	25.7229	26.9749	17.2948	36.6796	23.276	27.5274	33.3584	29.2222	11.0859		156.675	118.935	97.9603	170.192	173.166	161.002	179.037	154.626	73.8009	76.4137
157.611	201.334	228.666	190.618	234.367	139.103	103.217	205.234	140.007	124.939		275.424	196.201	176.779	271.519	168.065	73.7915	124.847	193.727	144.116	196.494		13.9256	25.4929	28.5575	18.7701	40.6644	26.5239	27.0219	31.0022	27.2698	8.55975		154.537	121.903	103.632	174.492	169.917	159.688	156.827	154.956	69.6833	70.5023
157.603	198.076	221.013	195.923	232.916	147.55	112.006	200.263	141.677	121.243		273.794	190.493	192.971	271.625	178.269	77.2928	138.511	181.565	138.619	202.188		13.788	24.3436	26.6749	16.7933	39.4059	26.7268	27.1674	28.1992	26.5753	5.13821		156.321	129.822	104.252	177.627	188.391	137.983	158.522	158.396	67.8197	63.2866
159.719	188.924	217.225	196.063	235.792	155.855	112.937	204.451	141.352	119.465		263.017	196.751	208.248	288.697	190.957	77.7708	130.211	182.081	138.337	208.309		10.8354	23.0035	24.8424	15.5426	40.0598	26.9831	27.2601	26.5046	27.8581	2.12393		150.82	133.319	109.209	183.856	185.917	145.408	161.444	158.03	66.8209	60.8742
161.884	187.65	217.308	199.91	236.908	155.403	111.848	200.241	144.888	118.436		280.778	202.591	207.825	295.909	207.092	77.8444	135.051	184.965	126.693	209.096		12.804	24.0813	24.3502	14.9451	40.5643	28.0614	32.9864	26.4553	30.2717	1.2206		145.205	134.222	110.683	191.625	192.352	167.193	154.467	152.573	62.826	61.2296
156.005	192.055	213.413	206.663	237.459	158.741	112.967	193.477	148.779	114.245		284.813	210.357	232.843	301.011	210.227	72.6512	134.795	182.625	124.483	212.414		13.5352	25.8869	22.7155	15.7503	36.7846	27.7271	34.5855	25.0761	27.6322	6.53319		141.948	135.047	115.716	206.243	205.702	163.466	151.23	147.408	59.0367	52.766
167.777	196.743	217.384	212.348	236.672	150.193	123.641	180.939	158.225	114.498		284.344	211.93	257.371	294.279	212.911	73.5891	131.736	181.431	121.861	215.867		12.3748	25.6132	25.9864	17.3842	24.2615	27.236	33.4002	25.6837	28.7301	10.8193		139.556	132.101	115.718	215.311	193.704	163.292	153.179	150.275	55.2354	53.7556
166.504	192.794	215.484	224.578	240.697	143.011	121.33	169.922	154.768	113.445		270.806	216.051	269.985	309.827	215.398	86.3857	137.466	180.717	114.722	202.312		11.8747	18.7966	25.85	18.8961	14.3411	26.2505	34.8431	22.3023	27.8619	11.4714		131.941	103.549	114.25	212.783	198.516	197.877	139.29	135.498	49.0801	55.3535
164.808	202.303	212.649	235.89	245.444	140.924	124.844	154.476	143.883	117.875		275.408	212.576	282.616	305.679	218.224	83.3278	152.432	182.78	107.884	203.428		10.5003	14.0365	20.9621	17.4875	8.7004	26.524	35.042	23.9618	29.5118	14.0288		123.552	107.349	117.745	216.244	201.998	183.162	139.398	146.16	53.9828	62.2183
155.741	196.391	213.502	237.644	245.835	145.333	128.65	142.795	135.048	125.177		275.514	211.065	289.237	292.756	204.725	88.2744	163.324	174.5	112.767	208.594		11.7768	7.07269	21.0388	19.2816	1.64139	26.7559	34.4862	25.6254	29.0375	13.4784		133.686	92.2516	112.006	219.276	198.855	186.927	117.622	137.071	48.0914	72.6917
149.426	200.925	215.102	241.518	244.254	142.529	126.722	150.686	125.328	124.754		281.648	203.482	306.887	290.478	214.538	91.0861	168.373	168.927	107.842	214.229		12.6053	1.8369	19.7602	17.6903	7.86789	23.7447	35.0854	26.9574	33.7859	13.3027		138.021	95.7156	102.453	218.126	200.008	187.396	126.299	138.075	45.0067	84.5273
144.916	205.203	222.219	244.307	245.279	148.583	115.179	148.743	121.826	131.329		279.785	214.604	295.292	287.962	218.653	88.4527	156.313	166.393	108.847	212.02		12.9809	1.68742	22.7581	18.1599	17.4773	22.6556	37.0908	28.2059	37.4972	13.702		136.605	87.7944	92.3169	214.527	191.486	183.719	163.808	138.726	44.7818	93.8848
144.855	211.306	226.293	246.227	241.761	156.868	106.476	147.8	120.118	141.558		292.55	208.594	285.499	290.766	212.841	84.7592	162.741	171.912	109.14	213.401		14.2	7.08864	22.9348	17.8458	21.559	23.3006	37.6784	29.67	41.6296	13.9598		141.952	86.8152	89.2129	207.961	194.002	163.131	161.716	140.354	40.4091	100.042
145.353	215.35	232.053	253.565	241.24	163.153	103.611	153.341	116.942	144.166		270.956	216.347	286.417	279.424	192.874	89.7584	161.32	174.765	110.905	204.945		11.6703	13.4904	24.5967	17.5636	34.3645	23.9588	32.1826	29.6243	38.2788	17.8715		142.789	88.689	96.3329	198.344	185.7	153.377	159.948	140.017	42.9761	98.8753
152.046	210.423	237.324	261.148	247.003	167.283	92.0262	162.412	110.705	154.272		263.983	210.567	271.473	280.035	190.075	103.108	167.187	180.89	109.629	198.454		12.3337	20.2163	28.4549	16.8528	36.7863	22.6862	32.2352	30.2002	38.1076	16.7938		152.054	91.5519	87.7307	186.201	172.364	153.679	165.396	131.215	43.0915	107.226
141.045	206.127	235.012	260.532	248.726	175.535	84.5745	168.468	104.493	157.07		263.694	211.302	249.804	281.899	187.005	110.122	173.375	182.029	108.703	196.834		15.1893	24.1261	26.7891	14.8574	30.1809	21.6384	31.9021	32.7757	35.0421	18.5863		153.164	87.1452	86.746	175.511	171.969	148.73	173.834	114.847	42.0982	110.062
141.147	204.732	240.593	261.339	244.648	176.881	89.9886	174.622	113.787	167.14		267.227	218.498	230.669	288.849	186.754	107.531	170.81	187.059	118.721	193.341		17.2183	25.2693	26.9576	13.3294	29.3921	22.022	28.9648	31.5056	38.8713	19.6453		150.774	82.3024	84.25	172.453	161.826	108.466	175.165	112.573	46.8509	106.672
140.199	198.409	239.586	254.955	241.465	177.786	91.2283	182.791	125.275	172.997		257.421	245.526	219.783	284.027	174.991	121.92	164.026	190.446	134.422	190.826		18.1705	24.6659	25.9714	15.7932	28.2166	22.2053	35.1442	31.4301	38.4111	17.5854		160.091	92.3349	80.4873	167.276	161.722	115.194	192.78	99.5631	47.5421	103.644
144.036	199.455	240.121	257.739	242.138	183.448	94.4108	190.501	135.694	181.873		258.948	274.58	205.235	267.961	176.052	130.367	161.335	197.11	142.753	185.609		19.8475	24.2333	27.047	13.3212	25.3054	20.7052	33.4717	30.5735	37.9002	18.9513		158.369	101.829	76.6822	163.315	166.331	109.741	190.045	114.174	53.3736	99.9907
157.312	191.63	234.185	260.54	241.233	190.348	97.9821	185.239	149.639	192.438		255.331	293.918	200.224	270.424	168.677	140.692	157.73	203.802	151.191	184.816		18.9456	23.5584	30.6169	11.9479	26.5839	21.8278	37.0159	29.664	33.1429	18.4846		159.872	93.2473	79.948	166.666	167.696	104.47	183.483	117.114	57.7112	93.7907
170.405	187.744	227.648	261.232	240.105	184.478	102.31	186.868	156.254	190.4		259.265	292.149	217.749	255.533	165.189	149.179	161.798	204.874	152.249	186.169		20.1056	24.9687	27.637	13.3673	20.4058	23.9202	33.931	28.7991	31.6692	21.3839		161.497	93.7182	80.4234	174.632	183.777	103.171	148.15	112.447	63.4968	91.6732
171.27	189.389	227.822	266.709	243.498	185.723	110.926	188.942	156.809	186.972		267.669	309.073	220.676	251.803	166.927	153.77	157.434	198.085	146.723	185.168		20.4146	23.6231	27.191	14.6775	20.2083	23.0392	33.1974	27.4723	30.9125	20.2046		162.568	84.1824	82.362	175.75	187.759	103.606	138.064	119.462	74.147	92.4497
167.945	191.113	221.42	264.037	239.9	182.026	113.308	185.459	160.117	191.643		282.64	307.307	217.928	238.024	168.9	164.505	160.623	190.074	147.813	191.78		23.0147	22.2943	24.0802	17.3225	17.2484	21.1312	32.9826	29.7214	32.6104	20.4801		160.143	88.4552	82.362	191.315	194.322	105.506	143.281	116.46	75.4159	99.5803
171.943	192.95	216.035	253.919	236.02	182.753	117.082	175.543	166.268	184.91		285.405	312.306	236.947	230.565	202.964	162.306	160.678	172.242	146.466	192.417		21.777	21.6856	23.2994	18.5604	15.8993	22.233	34.7765	36.5313	33.9071	19.73		157.086	90.9897	86.863	203.222	200.714	126.716	139.09	126.522	87.1763	102.663
180.895	195.872	222.348	254.059	233.607	180.125	108.553	174.8	184.257	193.499		290.152	309.765	252.306	237.547	211.666	159.059	162.958	167.6	144.391	191.446		18.8561	19.9797	23.1349	20.0878	18.2297	21.8289	37.6957	35.1551	32.6112	18.0302		160.929	101.464	87.8088	211.75	205.239	131.41	139.237	134.052	87.5577	103.68
188.165	198.821	219.193	249.968	235.699	185.579	99.4789	176.027	188.29	185.809		294.824	307.406	271.956	202.891	215.542	160.783	165.633	159.075	140.351	199.13		16.9366	16.5846	23.9187	22.3349	19.4076	22.0043	42.7128	38.0616	30.9849	12.9359		165.646	125.285	93.3599	208.721	218.66	131.456	167.432	141.694	89.6286	106.066
192.314	201.396	223.639	248.326	235.814	187.102	93.4487	183.687	191.562	184.177		302.267	309.3	286.345	206.675	229.38	155.73	159.137	148.002	126.182	195.178		17.3052	15.2473	23.8497	21.1792	19.2007	21.3836	35.9587	37.3263	29.3236	8.23584		163.422	115.662	106.43	215.923	219.923	137.76	153.111	139.646	95.1234	103.308
192.572	207.002	223.435	245.115	238.051	178.579	96.1747	184.893	177.651	184.687		300.945	291.428	300.025	218.269	233.988	159.035	163.178	138.896	122.801	197.348		14.6408	15.1276	17.1316	22.442	20.4526	22.3683	37.3648	37.0436	27.8745	3.96306		176.145	118.017	110.009	218.823	223.079	159.307	154.436	135.311	102.036	105.35
179.311	207.52	228.531	238.282	236.843	180.159	95.2211	180.776	167.441	181.734		311.976	295.078	302.255	215.304	239.43	156.984	161.114	123.492	125.227	195.014		17.738	14.757	8.99984	23.8152	16.3601	20.8854	33.4403	38.3573	29.2398	1.87888		173.814	121.223	114.481	212.536	230.095	148.367	155.021	130.795	111.304	109.044
200.747	210.255	232.289	233.194	244.798	176.893	97.9815	180.805	165.2	191.277		311.908	298.592	282.932	231.713	230.939	158.619	159.563	130.998	129.588	187.874		18.8394	14.0983	4.56433	24.1987	18.5885	18.968	32.8195	37.709	29.0379	5.47735		178.745	125.535	125.757	200.916	221.569	157.177	152.129	137.513	112.074	110.768
213.35	207.279	230.161	234.395	246.419	174.637	95.6605	181.146	169.819	193.335		303.487	292.233	285.417	236.531	227.575	164.276	169.483	137.1	135.017	190.59		17.8011	13.8371	2.05393	24.8127	19.0358	20.3984	32.5535	38.1137	27.0798	9.54133		176.449	138.063	128.982	200.501	224.813	159.229	157.559	130.279	112.213	109.056
213.049	244.536	232.065	236.975	252.414	175.93	100.053	182.967	171.909	195.756		300.387	295.902	287.891	245.421	232.93	159.944	168.202	153.756	140.282	198.748		17.0151	12.2635	1.10931	23.5083	19.4456	21.8498	31.5415	35.8609	27.4513	17.303		184.824	139.034	131.586	191.118	222.682	149.342	148.953	136.822	118.064	107.234
215.554	249.311	232.883	247.105	250.484	171.928	107.304	189.416	167.174	202.818		296.737	303.133	264.237	250.375	205.86	166.461	172.332	209.164	142.829	206.837		18.0964	12.4959	7.2146	22.3412	20.6757	20.0979	30.4138	36.1209	26.3764	19.8429		190.889	139.492	135.361	178.394	218.221	135.324	157.265	134.961	118.182	108.799
213.793	247.625	222.438	253.552	257.123	173.335	116.744	190.533	155.568	197.939		291.94	311.947	250.508	281.065	196.078	178.964	164.032	229.886	149.496	210.637		18.7762	11.9741	14.2527	22.9529	18.0545	20.0203	27.1624	40.9475	29.5158	22.6464		188.259	138.753	139.323	173.202	216.062	132.474	139.177	142.18	134.843	108.525
211.398	247.313	225.58	253.928	260.261	164.188	116.924	192.673	151.505	205.901		283.06	323.58	230.023	295.223	185.775	189.898	151.128	217.649	151.265	204.254		20.9012	14.1074	18.1433	19.9003	19.1012	19.8136	23.7496	36.2191	23.1172	19.1215		185.96	123.711	137.499	176.169	203.736	144.082	121.354	136.334	145.903	108.238
214.002	262.91	224.177	259.575	265.906	168.064	124.789	189.376	147.282	202.784		280.475	323.898	218.375	313.143	179.657	195.383	143.952	210.746	160.942	201.894		21.7163	17.1482	22.3248	19.4159	19.7284	20.1053	30.4685	36.2431	18.237	18.8855		186.531	132.944	121.387	169.485	204.254	137.889	123.084	134.688	151.754	110.956
224.483	258.866	222.426	257.64	271.52	172.528	107.631	189.575	156.477	195.549		281.96	335.077	216.257	322.476	175.963	197.266	146.629	209.064	161.668	195.524		22.7222	19.5056	20.6535	17.8073	17.2623	19.285	31.7408	36.0522	10.5401	16.5603		177.739	130.507	124.91	167.579	197.701	126.484	116.174	129.834	153.103	109.752
240.098	261.435	218.392	261.198	275.052	169.341	103.747	191.89	165.381	191.865		266.99	324.637	209.337	318.068	169.496	205.477	155.864	205.801	147.992	192.365		21.5176	15.0843	22.7454	17.1731	20.0412	18.5017	37.7992	35.2172	4.3596	13.3313		187.249	135.25	119.216	173.232	186.774	129.863	107.125	130.246	152.615	105.502
223.374	261.18	217.126	265.849	270.474	173.823	103.566	195.353	167.293	180.079		271.915	325.601	212.334	308.502	168.183	214.066	151.735	208.939	147.07	196.302		19.2996	10.0017	22.905	18.3955	17.6511	19.2757	38.2925	39.4195	6.36546	8.77534		183.042	140.251	116.503	175.228	184.7	128.947	93.2628	120.08	153.829	104.662
215.163	263.589	219.187	266.313	269.306	168.695	109.324	197.999	166.137	177.229		280.661	333.868	207.02	305.359	159.417	218.524	142.306	213.684	172.799	191.452		20.831	6.2072	26.5679	17.3377	20.5245	19.3522	43.0982	36.9758	12.0664	4.03456		186.737	136.517	124.086	175.311	178.722	122.097	86.6713	126.277	159.767	104.939
227.332	221.367	216.675	264.115	265.506	169.625	106.886	203.838	167.759	175.756		282.302	328.261	193.027	301.461	147.411	222.617	141.84	213.992	175.404	185.867		22.44	3.11012	26.0207	15.8093	19.9522	18.5877	46.1941	41.4186	17.5104	2.95667		184.207	132.309	115.339	197.435	175.451	123.814	83.7281	122.922	156.719	103.832
232.38	214.907	218.143	251.927	265.141	167.223	108.152	205.831	175.254	171.402		289.92	321.159	198.427	301.353	137.798	224.075	130.473	204.758	184.244	189.887		24.8122	1.43386	29.2555	16.9764	19.5539	19.5513	45.5847	38.1218	24.6175	8.2337		179.243	135.464	111.095	196.227	156.448	113.839	72.8979	122.182	158.071	104.718
223.245	216.027	219.089	246.118	257.299	161.001	106.031	214.417	180.523	174.276		287.515	316.902	203.651	250.5	139.663	219.998	129.637	188.168	187.25	188.071		24.2577	4.42274	28.5102	14.9867	23.2145	21.0306	46.4454	37.6993	31.6703	12.5263		181.055	139.358	113.826	200.017	138.005	111.154	76.414	116.305	142.834	108.62
237.431	215.805	218.1	243.549	254.823	164.278	111.535	218.797	182.769	167.86		303.24	304.823	227.667	250.003	145.335	222.321	139.016	190.204	188.845	193.495		22.3402	10.9879	31.2452	17.4341	21.2672	20.714	43.2505	43.5258	32.8453	16.2107		178.001	135.792	109.771	196.327	125.447	103.612	78.8637	116.897	131.347	113.652
244.564	200.281	223.245	230.054	252.867	156.21	105.792	223.469	182.651	175.203		301.706	296.666	234.658	236.106	169.499	251.512	143.57	190.629	183.7	198.398		20.389	18.8278	32.1656	17.0835	17.465	21.58	36.225	41.6772	31.0131	22.0249		180.646	122.551	119.653	194.453	109.47	106.147	107.644	118.631	117.203	117.159
241.759	199.754	220.927	240.17	244.07	157.035	113.12	224.61	184.899	175.835		293.418	284.326	240.189	222.801	180.333	278.892	134.844	191.536	176.077	202.917		19.6732	26.7262	33.56	18.8151	14.6477	22.4003	34.8998	43.0673	31.7413	21.1804		183.498	124.604	120.176	193.684	113.271	94.2381	104.662	113.983	113.57	121.407
244.514	194.32	223.571	233.546	247.181	156.79	113.307	228.246	183.352	178.443		304.411	285.986	252.228	234.198	167.531	301.432	121.265	199.163	184.968	207.411		18.1959	26.0571	32.3036	21.1265	7.27275	23.3238	29.3346	45.1795	30.7935	20.4486		175.943	126.32	123.722	190.953	101.697	105.277	123.006	114.453	114.21	126.16
234.84	197.036	226.363	236.243	245.173	156.02	112.827	226.445	195.158	182.147		292.966	288.688	252.363	243.016	174.713	305.389	114.117	200.73	175.026	198.789		18.1452	24.3163	33.0944	21.1642	2.67182	22.0457	28.6884	46.753	25.0233	19.6729		182.426	135.165	126.706	196.537	83.5961	98.3489	150.84	113.796	111.811	127.45
237.751	192.759	225.307	239.033	242.133	160.053	116.385	224.692	205.772	180.899		287.806	285.574	254.559	245.024	217.444	314.376	114.749	195.045	142.98	194.013		16.8521	23.9466	30.7465	21.5179	1.45861	22.1151	23.7557	51.4685	30.5807	21.4236		176.693	155.123	120.97	194.097	64.3778	106.78	157.084	105.533	106.186	131.397
242.927	202.401	227.502	243.102	246.022	156.042	109.919	221.046	214.325	178.965		286.922	296.393	267.2	228.164	229.785	330.018	119.026	189.942	144.187	189.731		13.7562	25.5935	33.4804	21.0064	6.94253	22.6327	19.6525	45.357	31.1154	20.2143		175.889	165.587	127.923	173.487	49.7557	109.278	162.127	108.698	111.462	137.204
243.761	195.016	226.472	255.704	238.809	153.24	107.564	216.915	222.031	186.975		281.83	299.774	269.998	253.647	244.163	338.443	123.69	194.299	132.425	180.788		10.7685	26.1566	33.7212	21.381	10.3171	23.6951	20.4066	43.4792	26.469	19.5989		177.27	166.875	132.494	179.185	54.0584	113.378	153.773	113.217	109.518	131.428
251.764	199.936	225.15	258.778	240.884	161.178	106.794	206.286	227.099	187.276		277.791	305.919	265.374	256.292	248.16	355.965	132.853	205.049	133.172	178.945		10.9509	27.0568	32.1704	22.3054	16.8046	22.4738	21.7295	39.4066	28.2693	18.511		181.858	162.255	134.534	174.149	63.8822	112.57	156.661	115.658	117.633	130.971
238.686	218.861	223.45	261.508	240.536	161.652	101.069	191.245	230.302	197.122		269.712	310.028	239.388	244.938	257.923	367.276	131.499	211.817	128.478	174.886		12.9128	27.8588	29.6288	19.9372	24.0434	22.7567	25.1518	35.85	27.7184	15.3342		191.88	165.998	144.756	176.135	87.7491	109.408	145.667	120.049	119.293	128.044
233.83	240.376	218.496	271.633	239.51	172.111	99.0229	182.914	235.801	192.786		291.291	325.439	228.413	243.959	241.001	354.429	140.51	211.514	134.16	176.278		14.8548	26.1127	29.3142	21.6236	25.3752	22.942	25.0042	34.5914	32.5825	14.6023		192.992	175.096	139.898	178.555	96.7954	110.394	106.53	114.857	122.637	127.035
228.423	241.651	224.237	264.639	242.689	168.743	89.7628	178.553	234.76	197.353		294.845	334.787	214.901	260.877	237.878	332.746	142.757	207.784	163.483	186.277		15.6812	26.6507	27.0006	20.826	28.1704	21.6037	23.3181	32.0528	28.8233	15.6354		192.449	169.714	145.707	175.559	88.9656	102.671	113.525	118.217	125.294	127.845
219.797	246.227	224.975	270.936	244.242	170.202	87.9264	174.67	238.184	199.428		292.11	326.736	204.761	254.113	252.619	299.086	156.248	203.393	161.839	184.278		16.5966	25.9887	26.2477	17.7804	24.6383	24.5598	25.8164	32.5884	28.3623	17.8462		193.808	162.59	141.884	175.608	99.5837	101.162	104.339	118.401	122.161	127.54
219.148	252.005	225.779	269.642	242.07	173.95	81.9414	176.71	230.831	200.083		310.814	318.04	195.96	253.555	248.126	274.985	171.667	197.547	164.324	196.34		17.0787	27.858	25.4711	16.1369	24.0369	27.7707	28.4929	29.8804	33.8883	18.7336		191.568	151.054	140.14	169.552	103.395	105.791	88.6521	114.406	122.879	125.613
213.791	259.584	223.816	242.252	246.227	172.027	72.7271	175.585	224.201	202.809		310.05	306.623	191.452	245.167	214.057	246.301	178.563	197.269	169.804	198.339		16.2106	28.2277	25.5627	15.7735	27.9592	28.9454	24.9887	28.7613	28.6533	16.3446		198.904	138.491	138.721	170.308	111.713	103.571	92.374	115.607	120.867	126.132
195.818	261.319	219.266	222.248	237.834	178.107	79.7335	172.138	216.288	201.739		307.785	301.277	196.39	260.921	209.65	209.102	175.994	203.912	161.955	195.122		16.5717	26.7078	23.9406	16.7792	23.0526	29.4985	25.4123	28.4233	30.0478	16.1375		195.866	134.019	147.898	171.582	114.497	105.787	106.225	122.554	112.066	123.367
180.488	276.078	218.874	235.234	242.879	208.85	75.5365	172.75	206.178	191.743		318.637	301.234	184.631	235.856	196.824	181.951	179.711	203.797	164.139	201.434		16.1585	27.7516	19.6277	18.2458	21.3974	29.3984	24.5308	30.4032	29.4893	13.4259		192.401	124.114	146.31	165.232	116.661	108.265	110.157	124.632	110.054	124.041
179.736	282.038	223.281	249.308	239.397	231.273	78.2735	175.616	195.756	189.518		324.424	296.247	177.958	259.201	187.066	152.068	177.148	201	163.08	204.936		17.2344	27.8307	22.6085	19.0284	16.5482	27.799	23.8921	30.4931	29.721	14.7358		192.312	118.73	147.274	171.16	117.071	106.66	114.161	121.073	99.8322	122.234
176.018	265.322	220.731	251.455	236.978	263.596	93.1925	184.21	182.497	176.884		326.735	294.499	186.076	263.87	176.275	113.427	186.55	194.798	167.478	213.136		14.4195	27.0433	22.4634	19.7709	10.1974	28.6419	21.9987	32.3667	31.1195	17.6258		187.825	116.223	149.37	178.062	99.8747	117.533	122.132	120.093	95.7246	122.971
174.535	246.512	224.268	245.341	232.981	278.689	93.0802	188.406	164.074	177.169		306.812	295.487	180.748	255.397	191.503	80.7979	184.798	196.555	174.782	207.915		13.8902	26.2063	23.1938	19.6125	3.53017	30.7631	23.317	32.0742	30.3766	17.0805		189.783	107.221	153.584	181.674	96.7845	118.142	125.025	124.606	94.0289	119.284
173.815	242.763	224.351	238.208	226.232	304.647	97.7741	186.879	162.169	173.821		314.902	306.178	181.248	252.345	182.989	54.7877	189.454	196.494	149.416	197.095		14.9167	23.8443	23.7349	19.8288	2.79142	32.715	22.6259	34.6744	33.4254	17.3996		189.533	111.38	142.82	190.394	87.3716	129.169	135.746	122.308	86.286	117.103
171.523	239.033	235.04	231.955	223.42	326.115	98.668	189.3	164.2	171.549		319.999	332.442	183.711	243.94	191.071	45.027	183.513	198.383	143.682	204.373		14.6379	26.8351	22.1042	22.1221	6.0136	28.4431	19.408	38.9168	33.6128	15.8612		191.929	103.811	150.586	188.295	80.031	134.683	135.585	123.253	84.7832	114.78
169.574	224.17	244.196	236.016	226.51	339.493	101.206	186.957	165.709	173.156		299.535	344.912	178.801	243.443	179.591	51.0595	180.977	208.856	138.76	201.942		15.3444	25.124	23.2095	21.9121	11.876	25.0716	18.1537	39.2203	34.1031	15.1698		191.563	105.954	151.532	193.322	84.4172	135.78	143.487	121.224	79.7532	118.284
152.849	217.672	248.154	257.557	227.297	362.842	95.9711	183.407	174.382	170.292		306.455	361.091	175.486	241.02	204.744	63.3228	177.72	206.964	133.681	212.201		14.1796	24.0404	22.9791	24.6011	16.9111	25.0433	18.0412	37.7529	34.0926	18.1085		186.729	89.8341	146.498	191.101	81.1117	143.602	153.385	121.38	76.1238	112.582
155.632	205.031	255.157	269.41	233.068	376.814	91.4047	185.181	177.642	164.59		306.42	368.141	156.452	240.353	219.198	82.4461	172.68	212.18	136.71	212.917		13.8521	22.5216	21.8227	23.7188	21.6636	25.3775	18.8432	45.9104	34.0926	18.2778		189.682	77.3817	133.002	187.678	80.1567	152.214	148.662	111.59	77.3748	109
159.74	192.677	262.216	252.902	233.319	372.975	91.1215	181.029	183.222	165.351		304.333	363.944	165.27	272.491	226.231	101.627	174.212	220.699	125.599	211.101		18.1226	20.3134	21.5616	20.5724	25.8064	26.5099	20.3041	43.3072	38.7681	18.679		193.944	85.9041	127.192	193.661	79.373	155.543	158.703	108.363	76.2322	108.422
159.108	184.486	264.687	238.838	237.313	367.323	90.1444	179.762	189.089	161.02		307.617	360.013	165.47	261.706	238.823	105.348	173.067	218.438	117.008	207.989		17.7304	19.1441	19.4017	20.412	26.0027	27.385	25.6596	43.6309	36.5801	16.682		189.875	94.9935	121.479	186.294	89.2258	164.104	162.739	108.582	82.2655	102.772
166.199	180.501	275.708	238.086	238.48	347.577	74.5055	181.307	198.111	164.423		305.242	359.599	154.498	261.645	238.268	106.287	166.161	217.894	106.095	191.724		18.9558	17.4312	20.0451	19.4295	29.9629	26.1064	29.3236	45.1409	37.9347	16.4262		187.421	95.727	121.652	181.775	88.5094	169.82	157.616	105.311	86.2382	100.687
191.398	182.655	272.07	237.578	238.798	340.631	71.9006	181.512	208.911	157.296		318.456	347.049	147.503	272.996	220.334	103.348	164.988	218.811	90.5133	190		17.2527	18.5899	18.0558	18.7365	27.7382	25.9467	26.838	48.1469	39.8507	18.1727		184.068	103.419	121.206	175.793	76.7213	159.208	163.586	107.302	85.404	98.251
200.24	194.642	271.45	239.9	240.694	332.093	74.0484	185.592	212.353	151.567		320.22	337.532	135.412	273.275	230.138	114.544	149.961	215.899	83.1499	187.87		15.0824	18.9138	21.7903	18.7483	28.9185	26.5744	27.8378	49.7228	38.1266	19.0076		181.758	91.4311	130.265	164.594	78.2755	166.656	166.823	112.873	88.5115	94.7685
205.939	200.697	265.688	241.701	240.087	320.592	70.6654	185.134	202.008	152.533		322.193	325.958	120.497	276.046	224.699	127.535	150.109	210.159	84.6928	191.481		16.5942	17.0309	24.0632	16.1534	26.3011	28.5709	33.9891	43.9326	42.6879	20.2649		179.809	98.4163	125.284	165.866	74.0521	164.53	176.098	112.502	84.6368	92.9625
214.594	210.865	250.622	231.166	245.788	317.226	75.2836	187.277	201.131	159.416		333.291	322.982	133.822	281.814	242.455	125.129	142.784	199.223	90.1138	176.924		14.8598	17.7829	22.6557	16.3634	24.1635	28.0961	36.2755	45.6881	39.6859	20.4773		180.973	85.9969	118.335	154.08	67.1828	157.066	175.49	118.625	86.4816	88.1883
235.76	216.155	253.192	228.873	246.237	304.264	80.9258	192.656	189.798	165.399		325.688	317.544	134.43	279.233	218.636	118.311	145.162	201.128	96.7332	191.438		16.5242	18.3477	22.5639	13.0751	27.4366	28.442	39.024	50.3679	43.5364	18.9319		186.525	108.264	131.986	153.223	72.3364	166.746	177.741	129.172	89.9542	86.0288
241.572	219.338	253.365	224.646	243.344	301.012	78.8526	194.33	183.181	183.516		319.137	314.228	149.127	287.724	202.145	104.63	149.999	185.539	95.8919	196.493		19.1588	17.8825	28.1768	17.2476	21.365	29.2708	38.2786	42.3315	43.5364	18.9742		183.804	120.561	132.462	153.801	78.5088	153.295	178.749	132.053	83.5906	86.764
248.234	234.729	246.692	217.942	240.141	289.372	79.9304	201.145	180.303	196.075		304.237	315.073	151.794	287.685	194.501	98.9764	151.778	163.924	108.92	188.751		15.3149	18.9155	28.9535	17.5022	19.3369	27.9751	37.225	41.1474	43.2601	17.7391		183.785	110.933	137.755	140.223	97.386	164.028	167.856	136.721	83.1047	90.1878
249.101	236.334	246.222	218.504	236.075	280.862	80.4778	203.834	177.751	209.117		297.205	315.07	205.717	270.994	191.489	99.8503	155.955	153.457	108.482	200.052		16.3717	18.3346	27.7405	16.2199	17.026	28.788	31.6323	41.3841	43.9609	19.2585		184.453	108.016	135.591	137.886	87.6766	147.601	175.258	138.422	79.1097	100.65
245.765	241.655	240.128	217.144	233.784	286.812	82.1141	206.895	171.141	214.812		288.924	335.738	223.142	265.158	182.765	100.516	161.959	152.268	118.209	212.266		15.2171	17.7338	26.8911	17.329	13.1968	31.2903	27.161	38.1658	40.8504	17.9804		181.883	106.947	141.27	143.689	88.9464	140.208	178.699	148.261	76.9955	103.261
224.777	234.981	247.844	217.204	231.036	287.505	86.4625	211.073	161.68	225.591		273.833	350.777	249.038	267.365	181.616	108.82	170.049	149.107	120.502	209.072		15.1281	16.7167	27.721	16.9343	15.0413	30.8551	27.1835	41.9741	38.0559	15.185		182.071	110.712	144.435	154.528	92.1525	154.126	175.646	151.266	78.4403	108.513
224.237	227.323	247.119	219.344	232.473	285.55	84.5323	213.081	148.964	232.037		270.47	366.486	267.943	269.326	178.586	106.37	183.4	148.697	128.952	208.194		16.6138	15.207	25.2822	17.9613	12.8885	29.4841	25.4971	40.3195	39.1399	15.3492		182.379	118.243	135.912	152.448	93.581	144.592	170.981	155.329	72.516	110.127
222.834	217.822	246.772	218.282	235.314	289.358	90.7753	217.288	136.847	232.008		254.034	379.07	283.562	272.284	172.988	99.3901	181.576	152.388	131.617	205.337		15.1509	15.9686	22.3705	17.8255	14.9773	28.1431	19.9291	40.3496	34.9534	14.1563		177.249	121.862	142.212	143.526	94.0641	138.322	163.114	160.306	74.5845	111.786
232.464	207.14	256.004	219.42	230.656	283.343	88.8252	218.282	124.212	226.153		247.122	383.565	279.832	273.182	184.384	98.0947	191.409	151.173	130.531	218.802		18.1844	16.0729	23.1942	16.1992	15.2562	29.2867	18.3275	41.0073	34.3776	16.7938		176.363	137.429	148.199	134.426	98.717	143.585	154.557	164.379	70.1728	116.828
228.117	199.03	253.005	228.75	233.25	290.001	87.4641	213.086	121.65	220.768		258.572	387.194	283.582	281.858	164.292	92.9973	192.295	150.159	129.678	211.007		16.9775	17.3349	24.2053	17.4664	13.346	26.4643	17.4781	35.5043	31.5327	15.9989		179.041	128.141	139.13	120.441	129.889	127.514	140.073	157.17	64.4485	122.537
216.138	198.39	254.956	236.005	240.614	290.331	91.1767	213.682	128.408	211.541		253.929	383.592	283.451	302.925	173.782	100.322	194.326	161.04	127.913	215.437		14.3912	19.5986	20.4998	13.7254	16.2111	25.2967	16.2815	33.779	30.8037	15.1631		186.727	126.41	139.87	103.903	133.78	131.802	138.765	155.644	68.3864	124.672
215.172	191.437	256.568	245.708	241.879	287.763	94.8471	211.556	130.752	204.675		262.635	383.515	307.719	262.935	177.442	106.855	190.417	171.997	126.703	224.661		15.1039	17.9249	17.3469	15.3628	16.8244	24.7836	17.0678	32.6823	29.4787	17.6507		189.075	137.778	133.219	106.797	122.713	120.491	147.501	151.3	72.7968	123.786
212.291	183.96	250.821	240.179	251.401	284.495	89.2269	216.913	130.911	199.332		280.472	386.329	264.424	274.945	206.176	111.609	183.906	180.345	131.197	219.035		14.2718	17.8719	14.4582	15.8537	19.1383	23.3657	16.6673	34.8381	29.993	16.2959		190.319	136.434	136.582	101.869	114.131	127.351	135.096	148.98	73.594	117.7
214.857	178.942	250.17	228.695	254.01	272.579	85.5376	217.819	138.872	194.388		288.966	372.01	267.806	276.238	225.699	123.899	177.596	186.587	123.205	214.835		15.5818	18.2446	8.3686	15.5336	18.8601	22.2222	19.9196	35.5594	27.9515	18.7039		198.621	138.824	119.328	98.8816	124.994	118.951	141.497	140.98	70.9425	116.947
210.228	185.922	239.345	241.023	259.769	269.631	87.3576	209.796	150.115	191.178		296.773	366.078	252.175	270.999	228.081	127.248	162.619	187.179	147.856	222.66		16.426	18.7689	3.09012	16.5178	15.6274	19.3152	21.6064	29.414	19.6967	19.3472		196.85	139.022	115.548	83.9108	124.825	116.332	141.237	133.034	68.3878	120.443
206.974	176.451	244.436	235.717	264.43	260.022	99.3025	207.713	152.952	195.665		290.768	353.952	255.947	292.549	232.498	132.528	154.277	199.977	146.604	230.257		15.2743	18.8438	0.607393	15.8855	16.3104	19.4449	22.0357	30.4592	11.2223	16.892		193.417	145.146	123.691	90.2292	127.088	118.696	140.088	130.147	71.8068	121.636
195.534	176.763	242.341	217.869	261.686	253.102	103.814	202.663	165.713	194.554		298.141	335.206	253.324	297.304	229.146	138.035	159.066	202.417	146.631	224.917		19.1591	16.8651	1.84862	17.1112	16.6254	20.1172	21.4924	29.6302	5.6429	17.8571		194.007	146.109	111.998	97.5079	133.517	125.529	145.243	127.054	68.6862	122.431
172.672	187.211	242.838	200.572	264.949	254.584	106.53	199.055	173.66	192.961		308.234	330.194	259.983	290.433	222.483	139.227	150.091	203.659	151.428	217.942		17.5937	15.6807	6.90521	18.7425	17.6482	20.5262	20.3446	25.9909	0.567726	15.976		188.491	152.385	113.257	122.337	136.783	124.646	144.301	120.303	74.1625	122.123
161.3	194.134	244.805	167.554	259.972	243.152	111.592	202.671	172.005	195.925		301.47	316.439	258.943	293.57	246.411	154.336	141.755	206.359	143.556	197.165		20.0434	15.4876	13.376	19.776	16.9987	20.6828	20.4687	26.7156	6.68472	19.4176		182.173	156.894	123.878	149.277	104.46	135.506	144.023	109.191	76.4073	124.038
161.126	199.691	238.524	153.984	251.097	234.168	118.793	195.844	166.54	195.504		309.658	324.852	241.074	253.73	251.098	154.739	139.981	203.324	138.707	213.346		22.9492	15.9178	19.2306	23.2861	14.9902	20.3581	23.1946	26.7598	12.6094	20.6384		170.792	157.815	127.35	165.65	111.186	144.852	139.598	103.873	79.2133	126.005
147.251	191.283	240.819	128.571	254.061	236.375	121.808	191.284	162.827	195.224		305.182	334.581	250.125	257.078	253.579	153.937	129.177	200.097	138.738	208.528		22.9787	16.0541	20.4267	21.6888	14.0696	20.488	27.716	27.1718	19.907	18.1293		156.416	156.698	137.184	171.673	111.351	140.755	134.697	102.551	75.9324	124.504
129.202	195.621	243.74	114.855	242.81	230.984	130.395	180.805	159.358	203.014		292.306	342.848	247.552	244.659	223.898	155.939	136.807	199.825	135.126	205.998		23.6175	16.9269	19.456	22.4236	12.7981	21.1284	28.2853	25.587	23.9465	19.2155		147.295	159.342	135.592	183.184	120.451	144.963	133.225	101.838	78.3233	127.692
110.182	194.603	239.582	114.504	237.261	222.729	142.289	175.366	156.27	211.332		288.539	338.692	225.035	245.42	216.435	162.596	140.144	190.033	137.903	218.799		23.486	17.3254	16.8169	23.9362	13.3662	20.4258	25.5436	26.5591	25.6367	16.3924		135.776	156.979	146.28	175.417	111.542	148.274	128.173	99.6295	83.797	128.548
91.5045	183.821	245.171	98.2423	236.559	210.826	144.184	177.805	149.868	214.838		284.277	325.495	236.488	241.863	217.061	165.095	152.765	192.969	109.141	216.741		22.3208	17.1111	17.8514	23.0838	15.7019	20.7696	30.6217	26.5349	25.8922	17.3433		124.938	158.288	149.648	177.494	120.45	146.137	123.361	105.172	92.171	126.154
71.6664	194.754	242.555	98.793	227.854	211.008	136.07	174.706	156.471	210.571		292.956	330.081	234.684	223.435	201.596	167.501	156.29	184.582	110.102	220.325		23.5298	17.8313	18.6417	24.5572	16.2384	20.7784	33.7955	26.1281	19.4967	18.6107		116.821	158.826	145.884	174.744	116.385	147.152	120.839	103.198	94.7896	123.904
64.8222	207.57	246.34	107.901	226.782	210.005	133.564	172.256	160.229	213.551		289.326	329.468	251.312	231.408	204.097	168.621	161.624	180.072	108.087	217.835		22.0831	17.4503	19.2499	26.1555	16.6657	22.4592	35.7595	25.317	12.2923	16.6109		115.393	162.293	157.336	170.447	113.467	141.93	118.815	98.7529	106.478	123.884
59.9789	210.743	246.082	120.23	215.439	203.372	124.42	165.287	164.14	213.583		283.2	323.274	242.173	264.953	202.495	179.01	165.616	186.544	98.2956	222.947		23.5591	19.3128	17.4465	25.2869	17.2077	22.2514	37.5633	24.8798	7.24305	12.5422		117.456	154.851	155.107	158.917	106.206	141.044	127.85	106.684	111.524	121.051
54.3925	209.357	240.663	135.727	207.633	199.348	113.584	156.985	167.39	204.41		292.709	333.439	239.67	266.503	182.651	175.842	169.952	186.489	102.706	235.043		20.9002	19.6303	15.9946	25.8849	17.7622	21.9485	43.4705	26.3775	1.56601	6.46953		114.153	150.641	142.46	146.499	99.0538	127.579	140.544	114.219	121.604	117.202
42.7338	203.861	235.163	139.479	206.663	188.77	105.556	157.7	167.237	198.815		290.692	321.14	260.174	280.817	168.278	176.746	170.442	187.427	106.671	215.904		17.6878	20.4805	18.2355	23.7432	21.1188	22.4284	45.0448	26.7168	7.95817	0.749632		118.379	148.416	139.213	145.004	91.8396	120.422	146.991	126.541	130.998	115.972
35.9341	208.488	228.362	151.538	196.353	184.087	94.7185	163.832	162.438	186.751		298.617	303.222	222.753	281.435	170.248	170.247	181.552	185.959	111.983	218.408		19.3304	22.5807	17.5532	25.2421	19.5885	22.5335	40.6915	28.1789	16.0112	3.49398		123.538	148.37	137.375	143.204	81.3043	130.435	154.94	123.896	128.767	115.725
45.3939	205.094	225.764	152.933	204.957	179.875	88.4454	155.732	162.721	166.442		271.49	291.858	210.915	282.827	159.895	166.612	172.725	186.036	124.099	216.831		22.4924	20.279	19.2128	23.6225	21.0245	23.4635	42.0941	28.2176	20.9061	6.241		122.881	144.545	147.182	139.215	82.4007	133.49	156.785	125.585	134.586	111.566
43.6749	208.537	228.707	148.912	207.418	178.538	81.377	140.646	162.557	150.891		253.969	284.188	220.221	300.169	159.774	162.641	171.263	191.125	134.832	214.598		25.0045	21.1821	22.0345	21.2869	22.133	23.3808	43.9999	27.0757	25.7929	11.7813		124.716	146.436	145.981	139.992	87.3811	130.106	158.853	125.171	134.545	109.375
50.0775	213.031	216.897	143.255	203.181	177.441	76.2942	134.245	168.507	138.333		254.286	290.145	213.541	324.705	152.021	165.675	159.2	188.139	143.076	221.102		24.6852	21.8762	24.9124	24.2651	20.3272	25.7582	38.199	32.6466	31.5472	14.6368		129.337	144.842	142.849	141.455	75.3207	129.342	158.179	123.809	137.23	106.254
60.6776	203.375	206.809	136.488	205.339	167.029	81.2676	135.927	170.466	132.247		246.999	283.415	216.502	318.218	159.828	163.652	156.406	194.055	155.551	200.785		22.8469	24.0521	24.7638	22.149	22.0554	25.7494	36.0383	37.5495	33.4369	19.6428		138.935	138.483	148.821	140.313	82.6081	122.482	150.504	126.963	140.903	109.108
68.2866	196.763	193.552	132.528	197.964	164.567	78.4515	134.278	167.574	125.356		253.681	297.489	245.188	309.508	179.331	161.673	153.839	198.131	160.983	204.4		21.7354	26.7745	25.5123	22.6561	19.3883	24.9631	34.5784	36.6399	33.0355	22.9521		140.535	133.664	144.99	145.126	112.318	121.118	145.192	129.514	135.543	109.103
69.8284	184.773	181.493	118.961	202.175	164.349	87.5349	134.648	166.914	119.285		249.288	311.324	234.791	273.481	185.122	154.142	152.791	198.421	172.428	211.369		20.5439	21.9788	26.1086	22.5172	19.3739	24.9631	33.7415	37.3434	32.6788	23.5662		141.229	129.232	143.515	143.786	117.116	131.974	141.161	127.938	141.376	112.467
68.7967	181.025	178.153	110.112	205.289	164.812	97.1707	132.213	170.524	126.991		233.502	320.539	241.347	267.71	207.235	157.092	149.866	207.203	171.855	202.504		22.4856	16.5918	27.1591	21.2831	18.9358	24.6395	29.4468	36.0261	32.1201	25.9882		141.257	128.449	143.566	146.323	129.263	138.897	127.944	135.431	136.445	115.971
81.035	193.334	174.219	101.764	203.53	168.802	105.793	127.13	176.89	125.508		230.836	335.923	266.617	259.07	213.268	171.328	149.508	205.998	175.07	196.78		22.6886	10.768	24.8869	22.6682	14.7934	27.0545	28.6195	39.2211	32.1855	22.6115		142.679	124.278	137.388	148.225	128.39	131.637	121.378	136.029	136.044	115.911
82.6845	184.11	169.153	92.8232	203.129	160.061	119.584	120.468	182.233	133.018		226.319	352.097	272.892	264.284	217.857	180.566	142.711	217.89	169.601	189.654		22.5298	5.5706	25.3625	23.3158	17.9856	27.0545	30.7433	39.863	32.8432	21.8362		144.471	119.629	139.543	161.045	135.517	138.238	122.267	145.186	142.112	120.08
84.2899	200.178	160.506	93.4717	193.503	158.075	120.342	131.729	186.986	136.896		252.144	362.068	290.113	287.89	224.988	198.639	144.599	233.594	167.554	181.973		21.7245	3.30008	25.1749	24.2898	15.4996	26.3338	31.5128	40.002	31.4563	22.8311		153.877	123.014	132.516	162.962	140.515	139.697	129.601	143.731	134.548	122.877
99.6416	200.823	146.608	92.8012	194.847	164.684	123.574	149.368	189.236	147.937		268.155	364.381	281.788	269.594	221.009	204.922	138.274	230.817	155.119	183.08		19.2074	1.60249	24.0829	24.3327	14.6025	24.3578	32.6295	42.3817	31.0045	18.2642		159.356	120.598	134.923	162.972	136.718	147.653	132.619	148.204	139.423	127.938
127.396	206.775	149.317	97.5946	192.293	164.624	125.847	155.007	192.619	156.431		256.139	372.144	280.976	284.349	228.532	218.861	139.12	226.802	165.96	160.441		21.6869	5.75606	15.4748	19.7942	14.9035	22.325	37.1155	39.7454	31.1116	13.2993		164.838	122.743	136.938	164.516	157.113	153.734	134.434	148.235	137.857	128.567
140.387	211.415	143.766	105.334	191.491	169.617	118.384	154.531	194.164	155.961		258.317	367.79	294.228	292.208	233.677	231.442	144.179	213.868	151.145	191.878		21.7015	11.378	11.2967	19.9616	12.5442	22.325	41.3653	31.0388	29.6343	7.73547		164.246	125.273	131.034	163.785	174.466	163.592	140.721	142.425	135.167	123.661
157.116	209.474	140.509	105.329	195.286	162.323	119.855	161.57	199.68	160.428		259.027	356.323	245.388	297.128	218.68	239.378	131.74	212.909	157.444	179.189		19.8283	17.4769	7.25371	17.5073	15.0558	21.6747	42.7863	32.5243	31.8937	3.67773		167.835	128.121	134.27	163.579	174.816	171.65	141.873	146.518	138.396	126.253
174.003	218.897	140.037	124.093	193.068	159.868	121.458	164.659	203.066	168.227		268.042	347.361	252.689	292.236	209.052	242.755	126.345	207.006	163.834	175.776		20.9348	18.3743	3.104	18.5099	12.7884	21.3165	46.6478	31.4945	29.8754	1.3123		171.596	130.991	130.368	172.56	181.104	163.472	138.021	147.784	125.311	124.904
194.228	230.421	137.861	136.298	193	160.347	122.212	172.632	205.109	167.633		271.78	345.598	253.016	328.899	198.928	246.932	132.09	197.387	168.847	184.092		23.1547	20.0561	0.714571	18.1178	14.3327	22.4272	45.3023	31.8321	26.9786	5.92605		169.828	131.37	127.961	171.552	195.068	157.139	143.954	142.438	120.993	121.757
199.042	220.708	144.682	143.418	192.619	162.999	124.448	181.041	200.162	177.305		274.059	342.392	218.535	321.385	192.237	241.208	130.067	204.608	165.854	184.962		26.5582	20.3942	6.65297	16.4285	14.4805	19.3306	43.3922	32.0803	31.8661	7.66982		176.32	134.287	129.194	170.059	209.401	163.438	148.016	136.148	117.946	122.252
200.93	232.499	146.999	154.116	191.44	170.247	126.032	182.452	198.68	182.251		282.463	343.946	217.382	334.303	177.761	244.168	132.849	193.368	170.543	194.283		29.1682	21.7092	13.3286	17.761	14.3767	21.9207	41.0822	32.307	32.3887	9.70451		174.931	136.481	124.049	161.414	219.318	144.928	146.381	129.758	113.74	121.295
189.162	220.793	158.115	163.274	198.31	171.978	129.959	176.171	187.807	193.347		291.459	340.056	209.908	313.53	175.973	238.161	131.482	176.94	167.029	206.206		26.5075	21.8579	21.2948	16.7932	18.9334	23.6557	38.982	30.5678	34.7498	12.546		176.804	133.716	130.725	154.577	219.579	139.907	144.035	132.765	119.277	122.622
180.758	230.684	164.868	168.562	199.657	168.109	131.654	176.469	184.388	194.508		295.452	356.543	222.738	315.821	173.21	231.661	148.209	177.052	171.982	198.835		27.5803	20.9071	26.2503	16.7549	19.7658	25.0964	42.099	27.69	32.746	14.641		174.299	141.21	128.834	163.643	223.437	135.442	137.979	128.325	116.486	116.817
158.864	228.163	163.268	174.948	204.337	167.643	132.028	175.427	180.744	192.211		311.084	367.232	230.216	279.953	162.311	222.235	152.032	174.61	152.227	208.837		26.8423	21.4524	26.0243	18.7643	19.9129	23.5527	39.3985	29.1049	31.5971	12.9225		180.187	137.826	130.151	165.408	219.553	132.998	146.728	131.066	119.058	111.866
152.936	226.672	170.673	172.113	206.478	170.807	133.884	175.422	179.002	201.303		307.163	384.746	208.84	279.083	180.99	219.364	152.549	180.369	162.087	188.598		27.1484	15.9383	29.4023	19.0497	22.4631	25.5255	41.2648	29.1013	20.3877	12.5858		183.664	143.531	127.889	171.988	200.696	133.714	154.778	135.051	122.338	114.399
158.892	235.196	174.349	181.867	203.016	173.938	131.676	170.948	176.791	196.462		303.323	400.877	197.122	266.02	173.674	215.702	161.794	166.248	156.882	202.603		29.713	12.3645	32.8681	19.9785	21.8392	27.2369	40.0126	28.3533	9.51237	12.9491		184.726	141.757	125.189	171.869	168.173	135.796	161.073	132.854	120.601	108.421
146.883	229.925	169.785	178.844	205.345	173.27	126.627	174.806	176.573	191.577		289.703	404.236	249.071	273.433	165.585	216.172	164.289	165.243	150.473	203.715		30.6607	5.76179	33.4819	21.5382	12.6602	27.536	41.2576	37.2051	2.5907	11.2995		187.848	140.075	130.003	163.465	172.559	140.508	170.445	133.913	132.442	104.258
143.844	222.704	170.618	184.03	200.953	167.431	130.818	176.245	174.467	191.275		292.722	395.267	252.533	234.928	175.277	207.78	160.186	159.013	156.376	195.522		31.0625	0.386921	34.4973	22.3107	9.30087	27.6343	46.2384	40.847	0.0589286	12.7895		203.651	139.171	130.613	165.565	161.865	146.803	178.183	135.658	134.745	104.117
138.51	225.229	165.2	188.192	201.261	163.888	123.509	173.569	181.446	184.254		289.107	382.686	252.383	265.43	179.879	207.082	160.646	146.701	185.643	202.646		28.4046	4.57689	32.9399	20.8013	3.33323	27.0216	47.3836	40.7301	12.3576	16.0705		207.731	135.055	131.147	166.784	166.436	150.192	182.018	138.166	132.617	106.201
149.499	222.499	161.979	192.677	205.618	154.423	116.47	170.18	187.487	175.781		273.423	379.165	255.098	268.408	190.489	200.319	161.185	137.758	176.963	207.314		23.428	10.0448	33.087	17.2762	2.37309	26.3951	52.4187	36.6293	25.287	19.8048		216.497	135.533	134.68	161.718	163.311	162.969	179.842	137.167	135.068	104.277
172.874	215.905	153.479	192.828	202.385	151.451	111.954	169.633	196.115	176.426		269.575	384.525	231.962	266.36	189.94	197.065	167.902	125.597	175.18	199.157		22.0265	12.9544	31.7526	18.3239	8.31683	25.641	53.1199	36.5672	32.5562	20.7498		221.092	133.443	125.209	172.426	163.92	172.353	180.429	136.627	131.065	98.4692
183.305	213.221	147.391	191.518	202.883	149.678	109.387	166.689	197.845	174.544		279.959	382.512	251.49	267.3	192.698	194.995	153.924	117.754	176.553	198.34		20.5319	15.1874	31.4791	18.928	11.5995	24.3728	47.7906	37.6575	38.0477	22.544		225.182	127.237	120.654	163.776	166.878	175.847	182.405	134.191	128.948	98.4788
201.966	229.861	139.306	192.103	203.153	148.029	112.775	161.281	196.355	176.33		277.474	371.851	250.637	279.066	195.769	188.945	147.642	120.593	183.882	187.149		18.7445	19.1821	31.0996	19.0228	15.7468	24.9259	40.8476	36.0628	43.2967	22.153		228.254	128.325	113.396	162.685	164.941	178.708	178.82	124.06	123.556	100.137
213.918	235.514	134.168	195.007	200.58	146.866	111.613	153.467	192.113	171.192		281.545	359.857	257.953	266.15	175.822	182.172	138.889	134.024	177.445	188.224		20.0323	18.8702	31.3205	18.68	21.6984	24.2596	29.1118	37.3635	37.0324	20.4593		234.159	123.975	117.762	160.909	168.984	176.04	172.032	116.357	120.41	98.5695
204.486	222.885	129.371	179.363	209.965	146.533	108.4	147.242	189.463	174.348		278.605	345.3	270.706	287.292	180.683	185.028	128.456	142.225	175.434	199.106		18.5494	20.3565	29.4849	18.5108	29.6524	25.0598	23.4986	38.5525	36.578	20.9614		242.216	126.851	110.443	159.006	175.965	164.424	166.693	109.658	124.703	102.268
209.486	230.179	135.219	169.702	211.503	147.677	119.642	139.116	185.498	178.176		293.859	344.268	230.044	305.842	173.98	178.808	124.644	134.779	172.666	190.93		17.1857	17.3389	27.4951	19.4404	21.0281	25.1189	14.2742	35.9128	35.9639	22.9724		235.948	129.189	109.48	166.778	177.373	157.586	162.607	97.1577	115.909	101.071
216.235	228.626	129.856	159.337	221.425	151.037	121.067	136.395	186.466	183.69		290.148	354.651	225.069	306.536	161.098	176.375	118.472	136.121	164.547	188.849		13.2962	17.8165	26.8278	17.7475	24.1489	25.8868	4.78429	35.3177	40.6405	21.8697		225.697	126.845	114.994	168.179	184.727	153.502	156.627	98.0449	117.295	100.84
225.499	228.836	128.529	161.586	226.983	150.458	123.184	132.453	180.371	188.47		298.773	370.232	228.17	290.277	161.042	172.581	110.947	134.199	134.781	182.649		14.1838	17.8277	27.9608	17.9163	22.7198	28.8028	2.06316	33.1682	41.2484	14.8026		216.73	135.742	110.206	169.358	202.079	151.227	155.822	103.585	114.782	94.6673
223.166	230.118	133.987	142.127	233.491	153.585	125.881	132.226	175.61	196.392		308.514	387.596	223.777	276.372	161.346	178.556	104.921	138.231	136.861	172.7		14.2955	19.2999	26.0258	18.9729	22.1873	26.3325	13.9636	33.0902	36.4313	9.37849		204.972	129.761	101.379	173.367	208.702	145.568	159.731	106.425	110.628	94.9855
215.785	235.66	129.334	134.189	239.6	154.637	131.04	133.779	173.643	195.63		300.701	394.494	244.376	277.271	163.447	181.278	94.8084	150.997	136.555	169.092		13.9008	20.4313	25.4103	19.4552	26.3534	26.1978	20.8389	42.0217	40.1951	5.56545		194.603	132.647	105.772	164.02	220.467	133.29	156.74	107.206	113.97	97.8103
214.238	239.55	138.013	136.609	242.069	155.178	136.219	132.433	170.51	203.561		295.169	394.455	229.726	275.089	155.615	187.02	99.5218	157.065	140.258	181.453		16.3081	22.114	27.0736	20.4998	25.9275	28.669	26.6085	42.8542	38.3442	0.806115		193.003	135.561	109.581	161.369	226.267	127.689	155.334	106.468	109.602	98.6445
202.016	221.305	153.876	126.656	249.718	158.64	134.214	139.036	168.773	209.505		297.199	391.645	233.816	268.736	150.219	191.06	101.909	158.865	141.799	184.303		15.8519	22.6479	26.7603	18.5068	26.8651	29.787	24.4722	44.9999	36.9651	4.49889		187.616	125.784	106.496	156.023	228.869	125.339	152.233	106.411	107.479	99.1388
191.656	221.849	155.143	119.453	261.193	155.96	136.668	142.835	165.399	214.847		290.33	378.321	220.153	275.661	145.716	192.846	97.9138	140.039	137.217	188.773		16.0183	22.0562	22.561	16.6295	30.6771	27.5405	24.3835	51.527	42.7693	7.81297		178.953	123.006	96.4513	148.996	230.167	120.839	153.076	111.053	105.463	98.4623
196.296	221.476	167.248	130.855	263.076	160.017	143.447	151.755	161.444	213.783		295.296	366.754	239.574	256.695	140.163	188.918	102.198	136.37	133.027	176.736		15.3944	21.5247	20.9833	16.7987	26.7646	27.4092	22.993	49.4806	42.6045	10.2514		169.164	114.336	98.8026	149.335	231.731	132.792	152.563	116.052	92.3281	95.1694
220.01	207.934	171.439	120.992	271.064	155.747	132.26	156.047	158.944	214.877		279.17	358.229	239.23	273.095	151.619	194.937	108.726	141.782	132.716	163.028		14.0888	21.3829	22.9005	13.7192	30.5901	27.4103	24.853	43.2537	36.2136	15.3962		170.091	110.725	93.3218	145.647	220.233	124.1	149.661	123.367	96.5422	94.2359
218.245	212.898	185.544	116.819	274.477	157.586	129.933	150.118	159.307	208.502		277.915	345.633	223.57	278.811	142.26	210.706	111.649	143.28	130.255	182.399		16.7407	21.3202	23.4549	12.9067	25.9368	26.5355	26.5061	40.8199	26.0391	19.4946		173.06	112.943	82.6405	137.889	212.119	121.64	142.484	112.959	92.514	91.8435
217.308	214.306	191.013	105.254	281.209	156.983	134.626	151.301	165.102	202.889		279.081	328.303	226.751	286.31	128.544	215.034	111.311	146.614	142.456	187.622		16.1584	20.947	22.731	12.1928	19.0253	23.9627	25.444	42.1364	18.5519	18.27		174.181	103.317	89.418	129.249	170.665	115.826	137.385	102.544	94.8054	90.8797
220.022	213.364	192.106	110.669	284.339	152.849	130.787	149.671	172.067	198.81		280.351	309.952	228.263	290.119	133.861	209.728	112.952	150.013	146.952	183.154		15.3416	20.1035	24.6705	12.1029	14.4709	24.4694	26.0804	49.7287	13.9098	20.2121		185.265	109.668	98.462	120.15	159.943	107.687	132.327	101.293	94.9301	90.0467
231.037	212.069	200.831	110.862	282.987	154.63	130.97	149.713	177.545	186.895		284.619	293.155	231.257	304.018	119.377	209.858	113.226	139.173	148.155	200.002		16.8093	20.4098	23.7279	11.9384	8.90975	24.3365	26.0703	41.4784	5.47837	19.9323		189.692	111.322	87.3637	114.823	135.322	107.54	124.897	96.0307	93.6075	84.9343
242.893	198.634	196.712	107.319	287.42	155.403	133.915	145.088	183.827	175.622		277.301	288.245	222.162	315.864	137.114	212.269	104.056	139.102	147.331	194.385		14.9948	18.756	22.4672	10.8866	1.72471	24.9862	26.8527	43.9699	4.02945	20.8615		189.159	112.35	80.7917	107.076	112.796	102.757	124.686	91.0017	106.176	85.1102
256.053	205.359	192.31	109.221	284.771	152.938	142.68	133.34	189.831	170.748		282.186	291.331	213.198	319.036	154.932	214.017	106.873	137.103	141.19	209.83		17.9	18.5819	22.4519	11.3981	3.40358	23.9423	28.989	45.2102	9.33455	20.9818		189.339	120.452	80.5414	102.913	108.528	98.6646	125.555	90.3163	109.826	86.8194
255.797	200.156	193.638	111.124	281.752	149.776	147.964	129.269	196.638	164.97		286.657	307.617	223.193	329.667	160.277	230.52	111.155	131.409	146.539	218.122		19.8201	18.5001	25.2853	11.819	10.8278	24.8821	30.2422	37.8823	22.8373	21.7278		192.634	122.83	82.1107	95.8028	127.857	100.818	130.234	85.4993	115.584	88.8669
239.836	217.898	180.719	111.937	283.023	137.233	150.96	126.491	198.406	170.595		288.584	328.642	213.696	343.095	172.272	236.407	110.994	130.263	155.34	211.347		21.4842	18.2675	25.6137	11.8767	17.9211	22.6014	33.5512	38.9396	30.5574	23.1025		200.532	134.037	82.9522	79.5794	131.904	92.9136	134.268	85.447	133.846	89.6185
219.994	221.989	177.069	127.817	277.447	139.612	151.504	125.307	197.651	166.513		287.808	336.476	216.3	320.681	173.47	245.163	106.64	126.409	160.243	210.582		22.1069	19.353	25.5462	12.8289	23.7071	22.6003	36.3959	39.4688	30.8276	24.4347		206.77	134.883	79.7625	70.7983	139.488	98.7637	143.645	83.4004	138.053	90.4812
222.071	216.604	172.051	129.993	278.878	142.71	146.395	120.372	196.036	165.638		281.482	339.506	233.068	305.659	187.505	249.962	104.173	122.568	169.152	196.463		19.5839	17.808	29.2033	14.5813	27.515	23.2881	34.174	38.196	30.7697	25.2568		211.891	129.057	83.1533	62.8049	133.97	100.653	154.708	90.1542	150.277	88.8875
222.109	209.806	172.755	135.598	279.745	151.842	139.871	117.26	191.265	173.356		277.937	344.65	232.676	289.142	199.018	256.942	108.838	114.302	164.45	185.083		19.5696	17.808	32.1827	17.0531	25.7345	23.5933	40.5913	37.4055	33.6596	25.8439		213.689	132.101	76.5819	62.1218	139.747	107.619	161.192	88.962	148.877	89.8313
217.595	204.243	173.3	142.211	286.819	162.073	141.606	113.167	187.437	174.064		269.159	331.262	231.932	276.771	188.23	272.906	106.315	103.342	171.125	215.357		20.2381	17.2293	29.6797	16.7327	24.3844	21.4511	40.11	30.4327	34.0374	24.4473		215.768	120.483	66.2735	65.5746	141.551	116.297	165.707	87.0516	153.552	86.3534
208.168	198.868	166.071	140.997	294.747	157.383	137.889	112.638	182.523	181.498		263.238	329.003	228.804	262.334	202.555	276.92	102.012	115.313	187.606	200.752		19.4471	17.2829	29.2776	16.7286	27.7037	23.4536	40.7995	28.734	35.7821	24.7271		217.943	113.069	68.4656	64.5123	152.927	123.304	174.198	95.4075	156.774	91.7657
194.717	197.693	168.369	147.213	294.292	156.552	124.802	110.026	182.564	181.53		261.024	319.196	237.55	243.223	183.621	282.01	99.7478	117.588	191.415	191.074		22.6891	18.0695	30.3891	17.1438	22.4658	23.7844	43.0652	26.098	31.7851	22.1185		215.232	102.187	75.0376	74.1407	162.454	131.192	178.408	105.556	148.562	86.9815
179.289	190.24	164.656	146.301	300.682	158.659	109.405	114.72	179.779	186.324		246.258	299.641	252.381	250.5	174.126	284.05	88.6222	120.517	202.646	192.674		20.2702	18.6157	33.2034	18.421	24.961	24.3031	41.0063	21.8215	35.553	23.8219		214.772	96.0717	83.5954	71.9386	158.759	134.788	179.839	114.148	152.598	85.0487
180.43	186.822	159.559	143.395	306.472	160.476	113.64	113.657	179.467	191.818		247.66	273.844	246.476	248.374	173.468	272.604	81.7313	122.465	208.562	181.949		18.1762	19.1316	31.4444	20.0872	25.0106	24.3031	43.1876	23.6465	32.1692	22.7249		215.291	89.6116	80.2735	78.9735	141.149	133.114	167.221	120.08	145.269	82.1734
207.969	168.885	163.375	139.806	307.952	171.009	110.108	99.0974	180.342	194.934		246.219	243.703	245.032	235.438	161.94	262.109	75.0643	117.458	206.345	175.988		17.7849	20.6544	31.107	19.2687	22.7834	23.5138	39.8764	24.1403	32.1598	22.1757		211.527	79.9729	86.6403	92.9108	127.633	125.87	160.973	119.96	138.837	80.4205
206.036	166.178	163.021	132.991	314.056	176.229	113.137	90.2985	180.658	205.009		247.818	218.438	260.111	221.32	168.706	274.557	64.5273	113.047	203.087	207.703		17.2367	21.3363	30.1459	18.38	24.5319	25.6633	35.5447	23.8279	33.47	22.2927		209.931	79.3885	87.9949	91.41	123.823	127.174	154.408	124.478	131.788	82.2155
192.854	165.911	165.933	134.086	312.374	172.94	115.592	89.1303	177.701	210.896		256.216	187.403	241.614	223.207	176.654	266.228	56.7463	102.633	201.227	195.271		18.4043	23.7494	26.4326	19.0169	20.8453	26.628	39.9172	24.6928	31.6973	17.862		200.837	77.4737	95.2853	100.137	127.606	117.78	148.229	128.916	118.128	88.3724
186.933	162.658	171.419	127.721	306.493	168.194	122.051	90.18	176.677	212.319		246.661	160.22	233.786	230.81	171.253	255.082	50.1196	104.182	196.175	210.248		16.8761	23.7744	22.7275	17.5692	20.6788	27.2738	28.855	25.283	27.4186	11.2908		202.525	70.0206	103.882	99.3557	121.366	110.129	141.529	133.818	120.759	91.1907
192.677	160.37	171.041	123.199	299.863	163.358	125.519	96.9842	177.713	215.221		243.002	143.69	267.726	236.169	171.55	241.24	51.1618	99.0739	183.466	183.511		20.2938	24.7778	24.1511	16.8021	21.0696	30.3328	21.6891	27.0518	31.1963	8.88026		203.938	76.1898	114.19	95.8343	123.648	102.81	136.051	148.941	112.979	93.2586
195.626	163.35	181.33	128.839	290.767	171.066	131.972	89.9813	184.185	213.148		234.26	126.146	287.639	240.801	171.823	234.336	55.4112	81.3413	160.298	207.757		20.7572	25.4447	23.293	15.5669	18.4972	27.5758	14.1994	26.1787	30.4024	6.09462		200.659	75.0506	112.192	104.575	118.215	99.3446	140.203	153.239	107.62	98.3599
198.668	184.894	183.127	122.257	288.965	170.746	137.078	86.1174	189.912	216.247		220.135	114.609	285.689	253.217	186.625	222.53	56.4414	82.3679	150.604	213.429		15.9244	26.6681	22.5526	15.5428	21.7851	25.9971	7.28217	26.3259	30.8246	2.62977		218.297	76.3956	102.769	100.236	125.066	98.6764	133.05	153.26	103.605	101.943
197.432	180.705	195.755	119.914	285.298	164.149	136.282	73.6533	195.865	213.996		213.764	113.521	270.273	236.344	184.066	220.943	59.0792	67.7655	144.733	208.642		18.273	24.7467	20.2716	16.9436	18.8424	27.0546	1.55681	30.8184	26.3677	2.83651		223.547	73.9071	102.769	105.012	145.494	98.3359	130.949	153.634	93.4331	101.592
199.145	188.32	207.444	124.726	282.161	165.223	122.214	73.994	205.197	209.998		189.502	118.557	273.065	226.075	178.96	218.19	61.7474	62.36	145.574	217.971		17.0853	23.1909	18.0701	17.017	18.6819	25.8871	8.10941	36.8286	28.8461	9.28936		222	73.052	107.436	106.642	149.667	101.297	134.673	169.523	95.7368	104.044
179.332	197.024	211.274	132.238	276.885	161.379	113.149	89.5233	207.151	203.062		160.533	130.283	250.836	238.249	181.801	236.395	64.8376	56.493	140.314	209.292		14.8215	21.5706	20.8806	18.3202	19.9693	26.7015	13.582	36.6555	28.8461	11.2153		226.909	74.1264	107.436	99.9665	163.17	112.865	137.909	166.788	86.796	105.934
180.321	203.256	219.338	145.716	274.666	161.018	113.867	97.8742	209.756	197.372		138.278	135.512	241.745	224.544	176.462	221.584	77.1142	54.7193	136.247	199.827		13.8226	21.6967	20.4319	18.3182	17.8939	25.9361	21.843	36.7038	30.2847	15.7473		226.774	71.1085	117.12	107.683	165.405	121.385	134.62	163.72	84.5307	120.215
209.44	206.049	215.686	157.484	276.115	157.057	113.934	108.859	215.654	199.545		107.781	153.809	257.391	227.84	173.979	218.448	81.8104	62.6966	127.423	225.064		12.4055	22.449	21.403	17.0236	24.4696	25.1379	34.8258	38.3089	32.9072	17.3404		235.378	82.3946	108.805	99.0131	164.324	130.592	134.401	156.875	87.3115	118.481
216.641	209.171	213.529	170.482	276.057	158.098	107.596	110.032	219.774	193.595		106.315	171.715	268.087	221.386	172.241	222.591	88.1933	55.9235	138.258	228.859		14.3547	22.7115	24.2517	19.7151	25.1614	25.0674	35.093	38.5455	37.7642	13.7418		235.386	88.5492	102.245	100.638	161.663	137.362	133.604	154.371	83.0038	107.385
214.58	220.208	215.695	185.076	271.374	161.912	112.398	105.008	224.21	195.198		105.254	186.034	236.255	215.259	164.255	227.605	87.33	66.3694	143.144	224.881		12.5937	22.7716	23.0257	20.2954	24.2955	22.1703	33.2593	42.1428	33.4904	17.2089		237.026	89.2325	91.7642	107.109	157.762	142.303	134.195	143.228	93.2682	100.922
215.093	226.768	214.183	185.153	277.612	160.002	107.667	106.885	221.055	197.528		108.91	198.622	223.159	218.594	167.102	230.748	84.9943	81.1326	151.219	200.177		13.0958	21.8592	24.7402	19.667	28.1157	22.7488	31.7201	51.6903	36.8614	18.4801		241.417	94.0115	92.1023	98.9213	164.856	141.729	127.092	128.103	92.5941	91.3175
218.827	208.838	215.973	191.066	273.881	167.391	120.492	107.922	219.466	202.974		117.864	200.92	233.96	213.196	157.487	236.963	96.8078	81.4886	151.912	196.057		15.3029	20.4958	24.6762	19.6911	25.2799	22.6793	35.4945	48.4651	37.7272	16.5588		225.122	94.6466	92.8236	103.201	189.004	139.633	131.755	136.469	101.302	92.3038
224.28	214.123	209.069	196.339	266.564	178.409	130.756	116.219	222.864	198.801		120.079	205.305	227.912	218.867	158.843	245.582	98.4862	102.073	148.633	210.737		12.9172	21.323	26.3004	18.9326	28.032	22.5267	35.4553	46.6319	39.5736	17.5721		223.071	102.868	83.2628	102.854	173.705	136.33	126.039	130.72	103.729	95.0153
221.352	209.461	202.449	196.419	260.36	178.61	136.323	116.115	218.963	202.197		142.129	210.771	234.676	213.544	159.266	255.103	103.241	133.852	142.329	185.663		12.9389	20.4103	28.2591	20.2553	27.85	22.3616	41.1545	42.9506	43.0485	14.8374		221.945	107.818	90.1789	106.108	162.09	129.464	119.844	118.986	100.259	94.1638
223.948	199.655	204.811	204.824	257.377	181.754	147.867	101.291	217.412	204.167		162.679	207.931	264.16	206.08	155.785	249.246	101.11	154.232	140.336	216.436		13.6753	19.5092	27.0579	19.1991	26.1159	22.9306	39.6963	42.029	40.5054	15.2462		213.251	106.714	90.1789	113.165	158.569	125.232	116.555	124.129	108.407	88.4079
221.617	197.962	202.12	199.366	254.639	177.416	150.576	95.5094	219.554	205.197		192.197	216.286	260.96	218.615	152.11	252.402	96.8444	162.215	138.836	211.16		15.0568	18.7755	29.4816	19.0384	26.9522	21.3442	34.3266	35.2402	38.265	18.1187		217.458	109.793	90.1789	109.891	158.975	115.178	111.171	123.078	108.794	73.2626
213.565	194.422	199.973	202.986	246.704	183.947	154.345	90.4379	217.571	207.294		222.556	210.85	271.041	221.771	142.567	254.743	103.04	166.746	138.748	203.472		14.9889	17.4671	28.6676	19.218	20.2368	21.0912	34.2148	25.5993	35.6925	17.8692		211.673	99.3274	88.9051	118.689	160.714	111.061	105.011	118.402	110.2	69.8417
220.734	196.01	193.582	205.189	244.845	184.885	161.045	91.3214	217.048	215.349		220.131	205.618	280.252	219.139	148.289	252.462	96.9081	184.921	131.991	198.675		13.3863	17.2913	26.6147	16.5653	25.5443	21.1617	31.9256	16.6826	30.9448	21.939		208.989	96.5447	86.8824	115.198	175.644	100.829	110.826	121.571	109.575	76.0532
218.745	199.571	189.515	196.816	244.133	184.214	146.278	87.8496	210.101	218.346		229.7	204.179	289.688	221.886	148.955	248.479	103.142	193.5	146.176	204.254		13.7055	14.8566	26.9161	16.643	24.9697	22.9039	32.6037	0.245513	29.8399	19.0599		204.853	99.767	92.109	105.955	171.224	94.6116	116.241	121.251	104.545	82.2198
208.27	191.936	188.863	199.832	239.184	193.777	145.987	80.1336	208.786	216.61		235.799	195.59	274.958	230.472	136.02	245.638	109.451	195.494	145.969	216.87		12.5702	15.1323	25.639	17.6962	20.5481	21.5136	33.9641	19.7093	26.0888	19.094		202.074	98.1452	97.2472	109.301	165.085	87.3169	118.372	134.562	103.275	82.3898
200.797	189.006	176.971	194.366	238.46	195.616	132.541	79.367	204.432	211.645		236.537	199.923	257.195	248.825	141.129	245.483	102.128	197.206	141.952	202.511		10.9476	14.8421	26.0752	18.8001	23.3809	21.1284	31.6231	27.6334	28.0258	19.0665		212.189	103.976	105.255	113.563	138.283	82.1685	123.026	122.415	104.097	73.2682
194.948	194.188	173.096	204.391	237.136	196.479	143.424	76.2467	202.414	208.225		245.567	209.314	270.044	245.299	143.078	237.473	109.479	187.724	137.183	202.519		12.2163	15.91	25.5599	16.6453	21.4037	20.8591	34.5045	40.1378	25.5385	17.9309		212.338	100.32	108.674	118.447	143.064	79.8186	131.783	120.17	108.804	69.4834
201.886	200.329	165.845	204.841	235.93	200.951	160.286	73.7189	203.955	201.018		241.802	211.438	261.904	246.245	148.055	228.094	109.378	170.953	131.672	221.036		15.1086	17.0855	25.5838	13.6416	18.2613	20.7049	26.0712	55.9021	21.0296	13.1085		220.043	97.1556	105.015	113.67	152.858	82.3117	143.763	104.933	117.052	66.5494
209.096	187.911	154.029	197.644	240.739	204.791	161.729	83.5849	208.807	198.676		243.378	211.644	245.204	242.986	151.609	224.282	117.897	165.767	130.603	208.619		17.6133	20.5878	22.331	13.3315	15.1664	21.2308	24.8725	68.5906	22.4949	10.2245		223.828	97.3984	95.8943	111.651	163.404	80.1202	147.527	105.319	118.62	69.8559
224.024	212.561	153.239	193.035	240.071	211.29	161.117	79.5967	212.007	191.472		234.473	202.269	244.718	246.389	149.69	206.609	117.731	171.89	132.211	214.165		16.9009	21.3478	19.6124	12.5611	10.9453	21.3845	27.1047	73.7705	20.2641	5.20154		219.323	97.1338	95.8943	119.072	173.536	86.2407	153.228	105.072	123.572	67.2087
208.95	221.215	148.478	176.808	247.916	217.714	165.959	76.363	216.137	184.685		225.196	210.045	237.381	260.11	153.468	207.931	113.758	174.9	127.218	209.968		17.8316	22.1969	20.1962	12.9299	4.12093	22.7808	27.0676	78.5096	22.0391	1.6374		227.636	102.674	100.973	117.666	185.355	85.681	157.104	104.787	126.361	66.3421
200.715	229.958	150.659	180.565	244.875	220.566	169.141	73.8564	219.417	164.29		235.74	215.343	254.034	292.211	151.028	213.546	118.861	164.394	118.171	190.954		20.5706	22.0852	20.5494	13.9279	4.13466	23.0039	31.364	80.5386	22.8389	3.03847		229.838	108.94	110.15	121.422	185.381	93.7939	151.774	97.9791	130.96	66.5919
207.245	227.032	145.209	188.465	247.869	226.802	184.652	77.2278	225.103	159.991		236.659	225.838	251.933	307.435	154.755	210.641	108.315	162.627	100.584	202.808		19.7462	21.8123	22.2854	13.1181	6.87518	23.4719	33.5617	74.7013	27.0407	6.23511		233.093	109.372	116.788	122.466	189.203	95.4653	147.234	100.082	129.084	66.9303
217.761	233.387	136.284	194.768	248.629	221.181	192.895	84.6249	231.045	163.149		240.929	242.765	274.377	290.236	165.329	211.898	106.471	156.536	97.921	203.688		20.5649	17.1425	22.5572	11.5574	11.0042	23.7784	33.8056	75.4044	27.0056	8.77351		235.547	131.196	116.926	111.537	193.667	100.866	150.388	99.1957	138.376	64.8441
219.151	239.292	141.471	208.921	249.355	225.833	202.712	80.0605	232.663	163.245		244.821	251.397	298	264.479	165.146	213.435	106.823	151.174	113.475	220.298		21.2108	12.2585	21.899	9.42605	16.8011	23.7949	37.388	73.013	24.6068	13.8806		228.057	134.696	109.864	95.0491	194.731	101.431	147.536	105.877	129.335	66.6476
224.656	238.203	136.525	197.799	249.802	226.208	195.607	90.7635	229.211	167.856		248.783	249.649	290.052	265.622	167.616	215.47	99.9742	151.776	111.15	209.15		19.7404	6.93914	25.873	9.66657	21.8005	25.8949	37.5139	72.9614	27.2961	17.5212		229.091	143.931	106.641	87.6965	174.673	97.7253	148.408	101.841	134.662	64.6284
222.003	235.036	136.727	201.682	245.66	230.438	176.555	100.038	227.187	169.776		250.74	250.677	298.538	274.47	161.779	215.203	107.451	152.175	111.56	199.241		19.1128	0.895834	27.457	12.6581	21.6431	27.0976	40.0612	68.4807	26.3474	16.2972		221.948	154.611	102.168	86.5452	173.639	91.7918	144.028	104.65	128.497	61.2537
215.876	259.768	141.243	203.485	239.448	236.149	180.572	100.323	230.728	165.699		246.028	249.008	315.689	268.198	156.513	217.05	107.525	149.14	112.601	205.074		19.8471	5.0478	30.7513	13.177	27.5425	24.6206	42.4262	64.0049	25.5588	18.5601		223.865	157.356	101.625	86.4912	165.051	81.8112	144.749	120.141	126.099	62.4079
203.659	243.325	128.104	212.755	234.931	237.057	186.986	104.539	226.314	158.069		252.734	261.72	318.537	267.177	164.098	233.153	113.138	141.455	110.717	199.861		21.51	10.3163	34.3788	14.284	30.2213	23.5275	45.2499	59.6314	28.7351	21.0165		219.573	160.977	93.7712	84.2285	154.779	69.3476	148.436	113.596	117.827	63.4623
218.898	241.206	126.169	224.515	228.238	234.346	185.117	98.3588	220.823	173.223		254.048	270.608	316.823	259.495	151.063	247.261	115.242	132.08	113.456	200.052		20.312	15.5948	34.0096	14.9103	26.2751	21.7967	40.4351	58.2828	27.0098	19.6672		209.606	168.948	92.0789	83.7374	156.609	60.6636	153.77	118.98	124.972	65.0578
211.217	241.064	114.202	217.164	231.408	232.969	189.865	92.8455	210.781	177.14		258.05	284.723	275.973	241.153	137.318	244.548	118.629	135.011	114.248	209.184		17.043	20.7154	38.4228	14.7226	27.2517	23.438	41.1694	58.9193	28.7675	21.3688		211.426	174.266	92.272	80.5369	159.873	51.7914	160.679	117.304	122.393	65.1703
216.36	245.94	108.98	216.291	232.393	231.186	189.225	91.7616	202.498	156.609		250.124	283.51	258.285	269.231	126.185	252.421	132.674	124.213	108.154	185.678		15.2639	22.0714	39.7681	16.1349	28.0021	21.8993	44.5507	57.4409	24.9688	20.0073		200.341	170.31	80.7633	82.888	162.192	41.9766	164.74	109.626	118.663	63.7018
215.28	240.316	113.602	215.351	233.081	228.549	190.586	89.7463	192.12	139.901		249.482	276.824	235.655	269.736	110.04	248.123	142.467	121.758	100.862	197.993		14.6223	22.014	39.9776	16.9162	28.5671	22.5997	45.5944	53.2833	27.4593	24.0766		193.31	146.373	78.7012	97.877	148.527	33.3848	163.814	97.8655	117.925	67.8867
219.953	244.654	106.158	210.648	234.97	221.724	193.538	97.1865	182.335	121.03		260.164	267.128	229.802	278.082	93.2556	247.122	148.081	118.956	86.0453	194.238		14.7181	21.0302	45.9009	17.1041	34.2926	21.248	49.1053	52.1537	28.0033	21.1339		187.119	136.636	86.4559	107.377	141.964	27.1673	163.411	83.2308	118.412	68.1163
214.466	234.131	107.732	222.505	239.494	223.508	192.701	93.7415	171.377	102.846		259.45	255.534	219.078	275.929	72.0695	246.045	165.609	117.91	87.3911	190.166		15.1367	21.9308	41.3998	17.337	32.9768	19.0485	44.263	51.1712	24.7663	21.9064		178.868	122.55	88.2446	118.392	167.925	26.375	165.093	90.1719	106.823	65.9022
214.297	234.294	110.761	216.615	244.239	227.44	185.567	95.3855	165.286	86.8511		258.044	255.305	200.672	260.919	65.4553	243.655	166.729	115.798	90.8343	199.806		12.8287	20.3302	44.9678	15.2843	38.1081	19.6839	47.2326	51.9567	23.2994	21.9753		184.292	113.905	86.6424	124.135	168.771	36.6056	162.529	93.1459	104.571	69.4615
217.194	227.688	109.617	207.372	245.471	229.253	168.441	98.6804	158.938	76.3651		269.194	269.535	186.574	272.763	58.8868	236.852	168.415	107.63	116.601	194.12		10.9305	23.3729	46.9251	16.3811	35.6801	20.789	47.5245	55.4551	26.6508	19.2457		184.739	114.243	88.3337	130.752	180.688	49.3968	158.931	82.6152	108.314	71.6932
219.621	214.091	121.217	206.505	247.262	228.656	156.289	103.665	163.794	71.271		270.288	273.404	168.2	286.66	42.2397	227.275	167.054	108.377	128.749	205.431		9.09503	24.8238	44.3378	15.9556	33.6771	21.0573	42.5192	56.6272	24.5079	18.4199		192.411	100.937	87.2621	136.204	175.96	65.3075	151.846	90.9163	113.139	70.7996
206.917	208.061	121.369	206.245	249.548	222.202	155.29	119.483	168.973	38.1989		275.276	275.194	185.095	283.638	50.298	210.506	170.711	113.871	140.629	200.678		10.8802	26.1579	47.0558	13.9468	39.4205	22.3098	40.8635	53.469	28.9964	19.4565		201.715	89.3147	93.4649	140.264	150.761	68.7518	152.868	90.1628	105.75	71.1709
226.669	193.304	123.813	212.669	255.783	212.9	149.485	123.471	182.245	34.2933		276.301	273.525	217.974	316.967	64.8601	208.213	170.293	123.814	146.077	204.693		14.2984	25.5801	43.7874	16.3681	38.0913	20.5888	37.5515	52.0118	26.2021	18.5923		196.504	71.4497	95.1399	147.634	140.354	68.5456	154.358	88.5458	105.698	71.1937
231.339	198.604	128.128	208.245	255.229	212.115	148.083	135.507	186.462	36.409		291.531	278.938	233.096	282.551	80.6348	196.238	170.952	131.652	154.192	219.095		16.5111	29.4954	43.9548	17.0015	37.8177	21.9142	32.9358	53.2768	26.7755	21.8608		205.691	80.7786	105.265	154.358	127.512	74.2177	159.811	94.1725	117.291	71.6215
236.639	200.139	115.448	208.699	253.291	216.973	147.498	147.868	194.143	36.3588		298.979	288.756	244.876	284.144	92.8642	198.491	168.196	132.967	161.86	202.222		18.8707	28.4302	43.9958	19.2559	34.7417	20.9398	35.816	52.0543	25.9622	17.6556		214.19	81.7826	112.618	155.743	126.178	75.6586	167.808	89.8133	109.952	66.6197
233.95	189.339	114.208	212.271	249.174	218.149	143.761	158.05	200.413	38.2753		301.723	295.824	230.099	295.831	99.7079	189.929	166.06	142.842	168.239	196.842		17.9768	28.6285	38.9607	18.4903	28.3146	22.5483	28.2428	57.1032	26.5931	18.3067		224.898	107.242	112.618	164.933	120.731	77.9432	170.897	93.7704	109.688	73.4564
229.757	199.949	112.718	209.321	246.841	213.26	138.267	166.101	208.542	49.5077		308.219	314.802	246.864	303.322	112.355	181.398	153.263	139.624	173.054	187.536		18.5564	28.5733	39.8759	19.1327	30.1678	22.5729	26.0505	57.908	34.0124	14.8168		232.926	140.079	110.507	155.43	95.2781	77.5061	171.381	90.3666	118.373	72.8363
222.967	193.41	108.322	221.022	246.26	197.866	151.196	171.247	209.783	62.7562		316.322	315.266	273.55	313.598	118.349	194.327	146.271	125.38	173.801	174.277		19.8307	29.4678	36.3971	19.5916	25.5097	22.4812	25.5837	55.8808	33.5243	9.617		229.662	168.915	111.682	152.067	84.8071	66.3084	177.076	86.3424	118.86	71.7432
216.23	189.465	107.471	234.335	247.122	170.276	165.801	171.389	213.188	73.0229		304.792	312.62	299.464	315.806	123.858	204.535	144.215	125.222	145.522	190.78		17.8008	26.0602	32.5244	18.9242	23.7452	21.8834	25.5837	55.7156	29.2018	6.2396		228.147	157.99	108.419	142.047	74.7035	57.4915	184.51	79.9759	110.091	69.369
209.921	194.282	97.1967	238.174	250.972	142.812	165.983	177.348	212.009	79.7353		305.6	310.516	310.183	310.838	135.727	211.436	141.064	122.273	135.656	183.63		18.4239	23.592	32.6416	18.1769	26.0718	22.0141	27.9697	53.5943	32.5714	0.391884		223.459	164.912	110.342	129.365	88.4641	46.3297	196.715	75.6885	108.429	68.899
201.694	186.978	94.2974	239.198	255.507	116.383	159.762	170.757	212.686	88.6561		308.319	301.434	293.366	325.43	141.882	211.013	141.163	116.589	127.491	184.21		16.338	22.2579	28.8363	21.1653	20.7241	19.5623	30.5971	58.77	27.6851	6.59605		214.825	157.571	103.385	126.504	102.709	49.3959	192.286	78.2075	102.074	70.1741
188.931	197.14	93.6049	231.443	254.327	0	146.047	176.552	206.189	98.4358		300.736	293.514	270.116	282.924	147.411	210.338	138.291	99.2959	124.036	186.395		13.1649	15.2569	31.4031	17.7365	25.7948	19.4613	34.438	55.7099	31.9848	8.88515		216.978	157.584	92.6968	111.273	102.124	54.3547	191.334	78.8735	97.3557	76.0116
185.489	177.941	84.5391	233.593	257.558	0	140.642	165.89	206.916	107.686		298.94	282.019	253.541	269.766	144.654	217.635	136.506	83.5174	117.881	173.334		14.717	8.34155	23.3141	18.7609	25.0991	18.3862	38.4082	56.3734	37.6669	14.2953		209.183	140.514	83.8743	102.408	99.0894	55.1035	187.861	84.8627	87.535	75.5311
180.892	162.577	88.9146	237.191	265.503	0	139.471	159.045	196.652	115.466		291.011	274.263	247.583	272.496	148.498	203.784	132.069	88.076	123.67	163.907		13.1592	5.10293	15.3602	17.6111	27.9938	18.562	34.5772	55.4968	34.6829	15.0673		206.477	134.612	72.3621	96.5467	98.2398	58.692	184.095	96.1264	94.2326	83.694
192.629	151.874	94.3622	233.431	272.865	0	146.592	157.793	188.819	119.405		288.165	278.407	243.99	260.372	161.603	190.937	133.314	79.7142	134.262	167.11		13.4236	0.458991	10.5684	18.4993	34.9351	16.919	36.3314	58.5642	30.856	17.0424		198.944	116.579	67.6717	85.8952	96.8667	62.2231	183.713	107.086	86.3242	80.4123
202.237	135.887	103.174	233.759	270.475	0	143.125	161.048	187.251	117.836		279.859	273.893	235.944	261.702	170.255	175.394	137.474	91.2527	129.785	177.831		14.2216	5.82572	0.359886	19.4298	37.1957	15.8593	45.4829	58.6393	23.6943	19.9147		196.993	86.9251	70.1713	86.3383	128.539	62.5652	183.758	111.777	82.4135	87.3406
205.424	124.906	105.49	221.548	275.545	0	142.663	155.664	183.445	115.086		278.027	278.506	221.813	258.962	173.599	159.926	146.462	103.43	118.492	183.824		14.1847	12.1149	6.5514	19.4298	40.1629	14.2469	42.9801	61.4052	24.7745	18.7116		201.85	55.9756	71.3083	84.459	120.428	71.9378	186.455	120.757	83.8874	90.9177
198.502	119.815	102.295	212.276	276.566	0	139.793	160.072	174.24	113.475		297.161	276.364	218.569	288.032	173.594	161.438	149.963	108.217	127.597	162.549		18.2657	15.2644	12.5929	18.768	42.9469	14.1345	42.9801	62.4383	26.5738	17.5029		196.778	58.4705	71.421	86.7753	109.722	82.5927	184.083	118.408	79.946	87.5599
211.697	103.064	109.204	203.413	275.782	0	139.184	156.813	165.175	114.795		297.045	275.433	204.222	291.778	168.38	154.958	157.158	118.17	130.94	167.96		17.0199	18.0111	18.1031	20.2934	40.6478	13.7269	42.9801	56.6673	25.4825	16.0782		201.031	53.5322	70.1261	103.403	98.8575	95.5001	182.023	117.332	75.738	92.4525
215.313	105.621	115.815	189.085	273.845	0	138.233	162.474	154.883	114.961		300.593	278.578	230.446	274.534	166.87	149.285	163.031	129.521	133.816	155.912		17.3109	22.5398	23.3454	18.5574	41.7416	14.7358	47.1248	40.5884	28.0342	13.4766		203.685	59.2564	67.5272	103.953	89.6494	102.89	184.563	121.469	78.7731	90.5915
215.853	92.3115	123.817	188.072	274.764	0	142.391	161.927	154.123	106.589		307.682	286.261	243.57	279.873	175.619	149.292	170.898	147.875	138.316	175.795		18.9473	20.6936	32.0198	18.2597	38.1869	13.255	45.0977	35.1042	26.7176	15.0529		204.556	65.5324	70.4947	120.839	89.3028	107.912	181.866	134.942	77.5926	88.1453
206.348	84.7673	137.55	184.054	269.29	0	136.434	165.605	158.153	107.421		299.139	298.046	270.993	288.692	183.797	142.033	171.196	163.996	144.8	209.92		15.7605	20.5766	33.3468	18.1504	40.3265	13.5204	46.0925	22.976	22.119	17.3914		211.643	79.9431	71.2393	124.604	101.479	115.334	175.826	124.557	95.5881	88.4455
226.354	86.8842	143.134	175.104	261.865	0	130.25	169.071	168.912	106.202		305.626	300.735	290.687	290.695	184.856	146.5	172.09	161.296	145.172	238.087		17.5218	19.2401	33.9231	17.8791	37.3482	13.0391	44.0531	14.9905	24.6348	17.8818		211.282	90.8634	81.4588	127.597	104.916	118.806	176.657	119.137	85.5634	83.7477
221.048	84.4151	141.206	170.551	259.866	0	107.043	170.465	182.732	110.966		300.583	297.255	307.253	299.077	186.527	151.928	172.021	164.301	129.041	267.737		18.3706	20.3613	33.8119	18.0925	30.9326	13.1798	42.5049	3.39988	23.4596	19.7211		219.251	103.114	86.6603	135.469	107.815	123.402	174.237	116.715	96.2188	90.2976
219.778	85.6109	135.605	154.393	264.959	0	106.505	169.843	185.703	110.235		303.722	296.833	308.607	294.087	190.154	169.389	170.824	162.225	136.409	285.145		17.2695	19.6183	31.4652	16.29	28.7559	13.7006	38.8519	13.4319	26.4102	16.7749		223.022	111.611	93.8486	134.132	82.9955	134.987	169.018	109.297	89.3251	92.0503
218.378	87.4127	138.103	161.831	266.429	0	101.681	172.443	188.393	108.507		304.359	288.129	324.243	306.362	191.923	168.736	161.119	166.128	142.549	300.508		17.6372	21.3043	31.9651	16.6175	25.9181	14.1675	37.5728	23.2481	26.0427	19.5861		221.591	114.963	93.9728	140.685	86.0805	136.681	170.915	107.342	88.2712	92.4714
230.622	86.831	141.484	159.999	271.009	0	105.218	174.767	184.821	108.054		293.612	286.686	312.67	275.308	209.829	161.339	158.382	168.063	140.966	329.367		16.4845	21.2863	30.6209	16.3071	26.3619	14.8592	37.4005	37.5211	30.5005	19.8847		225.982	118.897	101.322	148.932	86.3728	135.686	175.004	105.004	91.5186	96.5785
220.038	92.3601	135.755	158.384	272.374	0	109.691	179.366	180.643	109.466		302.38	270.792	328.752	266.81	214.918	178.794	150.641	173.651	164.378	327.383		16.9885	22.6588	30.6348	16.5992	26.1079	14.5741	42.7016	38.6846	28.8957	19.6311		218.106	125.062	109.408	140.203	73.9788	129.897	175.29	106.58	89.1925	97.2415
229.891	82.6031	128.267	166.82	268.465	0	109.673	174.737	180.017	108.681		293.598	256.991	299.292	263.272	231.677	180.116	147.927	178.916	174.074	350.149		16.7859	21.5576	32.029	15.78	25.1348	13.1145	43.4788	36.4688	25.9921	20.222		216.687	136.129	122.204	146.099	70.6083	127.51	180.9	102.413	81.6219	99.4301
237.492	81.6254	123.676	159.428	262.797	0	112.863	168.024	172.513	115.901		292.272	246.756	281.144	252.179	223.867	181.326	146.632	167.523	176.424	333.941		15.7498	23.2823	31.3504	17.5185	26.2649	12.6953	44.5493	38.7646	23.0379	17.5051		219.507	137.656	126.127	143.381	69.0371	131.688	186.519	82.8964	93.4928	101.101
236.385	79.8295	119.84	152.71	263.32	0	120.569	164.959	164.226	112.601		293.634	230.304	255.551	249.227	220.393	186.887	143.368	163.997	176.585	317.063		15.931	23.7674	29.3709	10.0646	20.0429	12.7698	38.9621	36.7967	21.6662	14.3768		214.069	134.789	128.39	151.2	66.3653	129.169	188.061	85.8708	73.7077	103.151
221.836	79.0739	123.545	147.981	260.858	0	123.398	166.23	160.218	113.591		289.243	211.011	233.649	242.358	223.822	192.73	141.118	163.208	165.489	300.541		13.1624	24.2851	27.756	6.30047	11.4821	15.226	39.6144	36.4163	19.0418	17.8888		211.802	128.906	124.514	156.727	81.3691	128.419	187.612	93.0519	77.3726	104.298
214.263	92.1269	125.412	143.667	253.172	0	137.282	168.196	153.002	109.632		297.33	198.128	228.729	230.445	217.454	202.819	140.866	158.713	169.716	281.111		14.2895	22.8903	27.7634	2.43624	9.21241	16.8404	41.451	34.9445	22.3262	18.2197		205.186	106.045	113.106	152.025	95.3619	124.633	189.954	97.1336	73.6962	99.8824
211.596	82.3009	129.242	159.593	249.014	0	141.887	166.547	155.053	112.173		297.231	186.914	227.795	224.868	211.775	203.304	146.342	151.873	166.953	266.961		14.0173	23.8263	27.6971	0.37255	3.72028	16.41	40.5598	33.4234	20.2711	20.2098		195.787	104.313	114.38	162.143	99.5272	122.551	194.597	117.778	69.5312	94.0317
213.677	97.2966	133.844	161.054	243.962	0	143.535	166.385	155.454	120.815		300.646	195.543	210.349	218.84	215.247	214.848	150.936	150.428	173.99	258.483		12.6149	22.1285	29.9484	3.4706	0.195605	18.8252	41.3944	41.81	23.4473	18.2205		196.64	103.473	119.45	157.523	103.28	126.049	190.027	121.557	69.6601	96.4043
207.341	116.604	142.854	164.261	241.166	0	131.644	163.564	166.481	120.369		308.876	199.002	203.485	220.526	202.867	218.776	151.508	160.23	166.896	250.459		11.0344	22.3913	31.9234	6.79639	6.22012	21.1894	42.5073	42.4806	18.5027	18.4539		193.616	125.824	119.679	159.356	109.536	122.308	190.156	136.193	73.7833	99.09
208.259	113.463	151.963	168.12	237.898	0	125.345	159.255	174.209	128.314		302.365	221.683	207.192	253.999	204.473	209.113	165.325	153.749	147.458	253.394		13.9621	23.0379	33.4312	12.031	10.177	24.1045	37.2062	44.8959	19.0624	18.3978		201.99	123.841	119.891	158.983	124.678	126.279	189.24	144.55	81.3964	93.2894
195.381	135.23	160.793	166.597	236.698	0	115.895	162.611	170.917	138.161		313.3	238.021	222.016	248.768	182.926	209.373	174.791	136.939	138.039	249.719		15.6219	22.9117	33.973	15.3853	14.691	27.3128	35.8044	41.8561	21.0507	18.1523		202.447	121.259	107.936	154.342	132.186	128.346	185.439	147.325	85.2524	94.9724
194.735	145.675	167.677	180.078	233.376	0	107.321	170.122	170.525	143.534		317.449	247.17	259.136	249.907	174.741	214.908	168.927	136.031	128.832	261.041		15.1342	20.575	33.839	19.8272	19.3584	29.1704	31.8185	41.7308	22.547	19.8748		200.58	132.685	113.438	157.919	134.721	123.472	183.349	152.32	79.3647	93.4259
206.272	153.335	175.299	193.16	232.842	0	99.8166	178.241	168.198	154.203		318.211	272.012	276.676	248.862	170.05	228.891	173.71	143.316	126.409	259.964		15.9094	19.7144	37.8071	17.2175	19.6679	31.6407	31.1787	41.0368	22.9124	20.0587		209.311	123.367	119.931	153.664	136.228	120.72	181.333	153.806	78.8649	93.814
209.236	170.2	179.777	198.331	233.915	0	94.4358	184.631	168.605	158.44		308.549	301.29	294.423	244.075	169.573	236.069	175.116	147.736	132.727	264.427		15.9843	14.0665	36.3665	17.1964	14.7785	33.4853	32.8974	47.2681	23.4102	18.623		210.391	135.053	122.764	158.093	128.42	114.803	174.726	143.654	74.7383	91.5528
205.268	174.921	191.149	204.661	244.604	0	96.626	181.639	176.972	170.456		299.398	328.274	292.277	247.013	181.769	237.475	172.105	160.712	131.878	259.952		14.7258	9.25564	41.2915	16.3991	16.6492	34.2561	36.3601	43.4866	22.4441	16.9174		219.191	140.564	126.833	167.611	120.842	119.58	176.451	139.089	85.8829	95.4572
204.102	208.407	189.095	198.762	247.553	0	96.4714	181.164	174.03	178.399		293.966	346.713	300.965	243.201	186.392	243.863	166.994	167.086	133.277	259.044		16.6042	4.79203	38.2504	17.4367	16.9109	34.0934	34.6291	46.4689	25.0638	14.4301		229.696	138.459	122.617	171.398	122.53	114.905	171.478	121.643	96.5544	98.631
200.633	206.307	199.645	201.775	247.765	0	108.661	183.365	177.145	175.96		279.75	340.297	319.582	243.877	182.4	242.94	161.368	167.588	133.391	261.888		16.3077	1.06627	34.5406	16.588	15.8232	30.806	35.0736	37.7669	22.3883	14.2178		229.662	136.086	123.395	178.251	127.723	110.868	173.455	119.538	100.44	95.9136
204.124	205.57	202.8	207.086	248.636	0	115.004	184.627	175.377	182.26		265.033	336.202	324.804	245.464	191.05	242.053	160.644	163.914	142.098	247.392		15.4113	7.87066	33.5121	15.2156	17.8386	29.4017	32.018	40.0151	21.7682	13.3701		237.428	117.624	129.126	176.141	132.921	113.458	169.663	113.654	101.55	96.0091
195.48	223.568	203.731	208.14	252.337	0	117.715	194.988	173.871	178.294		266.643	324.23	319.347	205.05	198.565	231.342	150.827	166.964	138.573	241.371		12.6845	14.3538	31.8541	17.0139	18.3188	26.6667	29.9782	42.6932	27.3976	14.8664		229.544	120.453	126.557	175.851	129.899	107.225	164.849	99.2312	100.338	104.976
216.897	223.21	211.125	216.387	256.166	0	124.731	201.819	188.117	173.144		260.448	320.141	310.698	202.659	209.848	221.594	139.737	177.475	136.231	246.697		11.5118	17.0838	28.9271	17.2598	16.4531	25.7004	26.4832	48.4005	27.6035	14.3098		228.659	113.126	127.63	184.718	130.387	102.409	160.372	110.928	109.193	102.444
217.187	229.354	209.986	207.325	260.371	0	130.868	208.567	207.752	169.371		264.294	312.988	277.994	193.775	210.798	212.995	141.132	193.123	145.172	237.338		12.7881	21.096	30.7143	16.4303	16.1254	25.1873	27.9121	49.8329	32.0113	14.0015		225.696	100.206	117.894	181.607	141.419	101.2	151.152	121.694	114.749	102.704
207.84	236.236	208.509	205.533	259.716	0	133.522	209.852	204.314	168.85		269.642	299.091	266.232	197.9	220.425	201.334	135.463	193.793	158.184	231.52		11.4979	26.0372	31.2543	15.8781	14.7766	21.5647	29.2207	48.6231	31.1302	17.0181		219.529	107.124	117.216	190.462	140.483	106.863	153.134	115.994	123.674	98.2112
191.711	231.366	210.684	208.426	261.68	0	138.04	208.499	188.429	171.619		284.244	295.304	250.3	200.228	209.649	212.157	130.261	195.367	159.325	223.714		12.2156	24.2784	32.241	16.7536	15.3415	19.5581	28.7963	45.7003	32.7671	14.5572		224.349	94.9546	119.551	186.111	146.801	112.741	156.776	130.477	142.798	105.244
206.264	227.433	197.943	211.048	254.778	0	133.492	213.513	163.044	178.062		286.107	286.71	244.461	187.081	203.361	211.441	125.329	195.768	159.684	217.517		12.3759	22.7362	24.0385	18.3597	13.2013	19.5587	25.3335	51.4643	35.4589	16.1622		219.902	98.2942	126.379	182.413	154.907	109.208	155.805	126.045	143.561	100.048
213.096	222.256	205.269	218.726	254.4	0	136.648	215.391	144.169	180.206		290.103	275.293	242.376	180.956	203.394	200.525	117.423	196.96	157.499	225.542		10.3914	23.9854	21.1094	17.1859	12.6401	21.5225	28.8354	49.4953	34.3663	18.8373		219.495	88.935	118.722	186.997	152.49	108.409	161.386	129.13	152.405	103.734
213.369	209.339	197.246	217.869	252.307	0	123.883	215.441	126.837	191.489		302.402	281.128	227.585	158.561	204.143	195.921	122.44	199.615	155.638	217.331		10.5836	22.3472	15.5182	18.0765	13.348	23.8229	32.2159	48.2897	40.9167	17.5571		216.254	90.8632	116.126	187.633	139.309	109.396	161.808	136.599	155.455	104.667
212.853	214.112	192.291	216.735	249.331	0	116.116	218.222	109.481	196.979		307.099	291.766	229.705	127.065	200.348	194.465	117.276	196.14	147.849	220.334		11.4954	21.5475	9.21931	20.662	11.2658	21.8139	34.331	48.1569	45.2976	19.0505		212.139	89.0381	103.495	189.334	126.55	106.892	159.569	133.208	155.254	101.321
218.682	215.335	193.863	220.883	241.901	216.767	104.007	204.95	95.8306	205.851		303.6	310.914	218.437	105.241	179.644	200.416	117.985	195.054	142.165	219.726		10.9654	21.8597	4.53476	17.1589	13.1048	23.0855	38.1236	46.7525	37.6786	18.8446		214.606	84.654	105.231	189.919	146.28	102.643	143.945	142.836	164.729	94.4775
204.226	210.229	188.975	216.581	238.847	193.584	105.641	202.578	73.2457	216.497		305.58	321.941	216.637	96.0334	174.824	218.191	114.662	182.633	142.157	209.222		11.2909	22.3013	0.283831	18.0843	13.3559	22.7946	39.4347	45.989	38.7304	20.8337		213.108	84.3851	108.874	185.524	139.285	100.209	141.468	118.095	160.46	91.5967
199.269	207.434	192.241	221.652	235.714	182.121	107.804	196.659	42.5213	220.102		297.304	328.263	215.081	91.4106	180.81	220.575	118.568	173.857	132.858	205.986		10.1076	22.8178	4.87219	18.7027	12.6206	22.397	38.7607	48.238	34.3849	21.142		214.284	81.5797	111.537	188.516	121.827	92.6323	153.767	113.046	161.708	90.7446
205.322	213.267	192.891	222.146	237.776	179.024	110.417	182.425	31.4996	224.337		299.89	320.746	221.357	66.8619	173.041	221.876	123.037	181.09	110.467	202.248		10.8917	23.2365	14.8976	19.4054	9.67295	23.7893	36.3019	50.6616	38.5523	18.006		212.05	73.0082	104.201	166.943	116.734	89.1779	156.387	113.453	158.684	92.1947
217.094	217.338	186.302	217.081	241.221	181.94	112.204	166.388	27.6093	222.754		294.85	302.078	221.262	55.7941	191.138	208.823	129.092	182.197	108.533	205.893		10.2849	23.9812	22.9256	18.5173	2.64907	22.2289	35.2345	50.4355	38.7091	21.9089		205.305	69.0832	95.6883	170.682	107.535	85.7509	153.061	101.198	145.861	88.248
217.702	227.57	200.02	214.065	245.997	184.976	115.008	157.609	27.7685	221.93		293.811	293.897	236.278	57.6221	206.808	206.979	138.4	166.376	103.565	222.581		10.4371	25.0457	26.3646	17.2916	0.910208	23.007	32.8872	48.4998	34.2084	20.7393		201.838	71.4063	95.6883	174.746	95.3679	83.2725	145.906	104.037	139.436	87.8288
212.88	223.359	192.896	203.272	248.653	185.183	118.556	144.96	36.3365	225.892		301.816	289.835	253.045	49.9059	215.164	211.447	152.369	153.366	118.194	206.447		10.4067	23.7259	27.4306	18.3457	3.00988	20.6077	28.8473	48.3432	34.358	19.7305		191.095	104.46	98.202	164.495	94.1741	78.6026	144.577	98.102	126.339	84.5029
205.942	248.387	188.12	203.045	255.691	186.028	132.043	139.221	51.4121	224.616		302.828	284.813	264.754	56.7886	216.17	208.459	155.152	134.001	112.715	213.171		10.0462	24.8142	27.2861	20.4454	5.5568	18.1248	22.4653	49.4409	29.0317	21.0108		190.31	102.33	93.5131	162.955	105.291	68.4029	138.119	80.9811	123.962	79.3398
204.576	243.147	188.639	202.686	265.067	182.775	142.787	129.335	65.5872	227.225		302.661	275.774	263.161	68.3758	207.111	221.756	164.699	120.409	118.256	209.633		8.83539	23.996	28.7603	17.9425	7.63563	19.0936	20.0154	46.7393	25.0296	20.426		189.559	94.393	92.3679	161.962	112.941	70.009	134.012	74.5568	130.327	80.063
205.649	236.59	184.609	191.397	272.868	183.652	159.958	134.355	80.5085	225.486		302.427	257.683	290.759	78.7329	215.188	230.705	161.681	111.144	124.141	205.835		10.8635	24.2807	30.8248	18.8782	12.6002	18.7056	17.2506	45.4116	29.0173	21.3332		186.458	88.8317	93.2004	162.302	92.2959	73.3659	135.695	82.2703	124.977	80.0952
207.879	236.944	182.111	213.28	276.456	189.685	162.195	126.615	98.3768	220.803		293.866	238.888	297.232	83.7169	218.546	228.76	163.716	124.259	126.413	208.948		10.7941	26.0995	24.9792	17.7102	15.0998	18.6184	13.7852	40.8136	25.4944	19.2986		190.519	96.1257	97.1995	160.552	95.5443	75.4573	145.108	103.305	129.48	83.2204
210.16	233.051	174.169	245.83	279.355	195.291	161.976	126.38	110.504	219.693		296.331	219.272	307.859	85.4488	204.826	236.513	166.281	125.261	130.122	206.422		12.2786	24.2202	21.9191	19.4048	17.3631	19.5291	12.6624	38.0763	26.6009	19.2986		190.98	96.365	102.569	155.575	101.386	86.1285	147.449	106.168	119.66	83.5459
205.313	229.074	168.836	272.732	278.694	193.773	165.922	133.607	121.539	217.197		290.857	219.198	302.49	84.654	218.358	222.291	166.214	100.719	135.212	206.652		11.8334	23.5305	17.5343	20.2154	16.78	20.1852	14.7138	37.7306	23.1516	21.127		190.282	112.036	98.493	169.205	108.062	79.9131	158.321	107.82	120.17	87.0856
197.139	225.796	169.627	305.26	273.811	193.058	174.302	138.167	136.714	222.116		291.574	239.209	311.57	113.117	210.964	219.755	169.772	85.9114	126.496	196.888		11.5545	23.5535	10.6978	21.6237	16.1857	22.1265	17.9717	41.0306	21.3476	16.9314		201.305	117.171	100.664	161.424	114.572	87.5408	165.565	112.914	122.596	87.2877
200.529	226.226	159.27	328.978	267.055	188.771	182.374	141.762	150.702	211.231		288.642	238.972	305.83	128.45	190.627	238.518	165.984	79.7231	126.407	184.031		11.951	23.2803	3.24502	21.8463	10.5971	20.8129	23.9779	37.8415	23.5953	19.3561		208.098	116.322	96.9932	157.042	120.996	91.029	177.854	105.2	116.51	86.5296
215.948	233.741	160.669	358.561	262.846	187.258	180.576	145.783	156.423	205.891		273.872	244.406	284.696	142.777	176.068	238.704	155.2	82.0819	107.017	186.87		14.2859	22.2103	1.22732	22.0209	5.28954	21.9266	24.787	37.1159	22.241	18.4601		224.126	92.6281	94.7514	159.779	132.297	95.9202	179.077	110.636	121.893	86.1668
227.428	219.642	159.523	368.061	255.455	194.313	164.276	144.829	154.352	202.888		271.17	246.66	274.914	149.347	170.152	223.982	151.714	81.45	107.514	182.205		15.1655	22.5821	6.41196	20.5372	1.99735	22.2885	27.7886	38.9806	20.2271	17.6897		224.155	92.583	93.5957	155.611	135.876	112.1	181.947	122.534	117.136	89.5755
231.248	208.935	158.102	381.451	249.014	206.443	172.255	147.466	155.022	201.806		275.654	249.539	275.762	159.931	177.329	195.468	146.846	83.7111	96.7365	175.828		17.2494	23.3091	13.0963	21.1766	0.0648693	24.6846	30.4113	37.6109	19.5703	17.9043		219.234	107.469	94.0409	153.27	142.267	112.079	191.621	120.559	102.312	89.8631
239.921	207.98	163.752	405.453	243.013	208.113	178.331	141.724	147.83	200.767		273.165	274.47	256.955	171.576	183.882	194.695	148.065	78.2543	86.6673	167.611		16.1726	22.5332	22.8275	20.687	7.22186	25.0562	35.0247	34.8583	16.1999	14.2185		225.404	118.163	84.0866	151.252	155.471	112.69	209.604	106.402	108.902	92.2785
240.124	206.557	164.724	394.002	244.261	208.53	183.368	148.27	145.601	198.334		280.243	300.936	257.457	185.602	169.993	197.306	145.298	73.1314	75.5018	173.541		18.3027	19.5663	26.5828	20.6838	11.6342	24.4069	39.7318	31.2645	19.5811	15.1434		221.737	114.79	84.0866	144.174	165.165	115.595	202.806	95.6937	99.4102	92.3171
236.862	203.346	159.429	378.319	244.681	216.536	185.743	148.441	152.378	196.768		273.482	332.5	256.816	201.475	186.626	187.59	139.17	69.3928	72.534	177.029		19.128	19.5238	29.5925	18.3539	14.6393	24.2918	42.6626	23.0966	17.533	14.2061		222.677	126.269	84.0866	145.013	164.771	116.807	190.286	88.8935	108.28	89.4985
239.016	197.648	149.198	362.815	246.045	226.038	182.776	150.21	154.691	197.072		274.68	348.599	257.063	211.031	169.001	200.337	128.483	80.0195	74.4462	189.839		19.1798	18.6353	29.2918	19.9389	22.0309	22.8425	43.0701	15.4351	17.6408	13.7505		223.898	146.133	95.4982	140.187	171.929	122.789	176.805	110.732	105.657	86.4942
246.174	198.319	138.307	346.988	244.933	228.642	175.316	159.942	157.437	192.053		275.269	345.208	266.62	208.829	158.669	198.189	118.95	86.3985	81.0953	203.405		20.7366	18.5615	29.8488	19.5029	27.4218	21.8805	42.3898	3.12586	17.2738	14.9015		210.432	165.984	94.7577	149.547	172.384	121.606	169.023	98.5036	95.6592	84.1066
240.54	194.11	158.152	338.715	248.187	236.613	165.915	159.747	155.511	194.497		280.829	349.458	247.571	227.101	156.443	176.425	118.546	86.932	74.0062	210.798		19.1235	19.6452	33.2909	19.3739	30.278	21.742	36.432	5.88417	15.4599	13.0626		205.45	175.897	98.4284	138.437	170.162	126.711	154.459	120.894	106.305	85.0412
233.493	197.51	172.701	327.235	250.648	243.736	163.594	166.561	153.207	197.413		295.097	344.369	243.807	238.772	156.985	131.793	118.374	86.8294	88.5424	225.245		17.5737	20.3717	33.8315	19.1993	27.4915	21.0527	38.1457	9.40819	16.8143	14.7488		194.611	183.274	108.757	122.261	165.276	142.393	145.014	126.135	106.52	81.5942
230.029	201.992	177.605	331.426	255.098	239.169	160.386	168.243	145.886	196.343		293.959	341.132	236.307	243.451	158.698	101.554	124.217	103.779	109.743	228.791		18.0095	17.9591	35.0646	15.7896	25.9833	20.6931	38.7903	19.6693	17.0536	16.8145		196.322	191.503	118.647	121.509	177.51	143.358	135.501	133.264	116.588	84.3532
218.196	210.212	177.021	332.212	251.999	232.698	147.199	163.036	136.874	199.256		299.965	334.961	233.778	244.028	150.67	78.9254	122.882	110.4	118.499	233.878		15.6644	16.1141	37.8036	11.6124	30.3536	18.9482	36.3695	25.6536	16.6637	16.9258		203.357	188.428	129.79	119.183	186.678	155.247	127.231	141.872	128.478	82.7217
204.071	213.64	159.042	322.264	255.518	235.798	144.138	165.525	145.696	206.648		303.996	319.558	236.86	236.29	143.975	46.7437	109.881	116.65	122.405	251.48		16.2401	14.2048	35.1925	6.41013	27.3793	19.8317	33.5843	31.8528	18.3726	20.7315		201.016	197.683	139.744	124.846	178.557	157.33	125.055	137.3	114.48	81.2329
192.363	219.913	153.04	323.097	255.588	242.831	150.146	159.4	148.164	219.816		306.196	317.776	230.332	233.057	175.503	9.9512	121.092	118.361	128.594	247.098		13.8001	15.2881	31.0167	2.26615	26.8124	20.0901	29.9743	35.1706	16.429	19.3818		207.008	200.94	139.744	137.188	170.976	156.856	140.278	133.127	120.29	80.6366
194.236	225.02	146.111	320.605	253.15	238.76	155.115	164.059	155.164	227.912		314.479	308.314	225.526	232.641	176.313	45.8877	118.393	115.486	129.901	243.228		11.6825	17.8734	28.4962	2.88803	26.4078	18.9565	31.1642	30.9842	18.145	19.6795		205.098	217.719	129.868	142.312	168.937	153.83	141.362	128.235	112.958	81.3495
197.413	234.152	155.728	312.959	250.713	235.599	159.651	170.966	165.7	236.105		307.313	308.424	229.63	238.459	176.995	73.7897	138.126	118.889	131.236	234.926		12.5319	17.3855	28.7187	8.08565	21.3587	20.0972	30.5676	23.9384	17.2541	20.4833		207.912	200.758	122.161	146.236	169.521	153.66	144.455	107.531	113.723	81.6903
187.957	241.09	147.456	310.771	248.14	239.623	155.969	172.588	174.061	237.954		312.055	306.549	217.97	227.664	182.941	101.12	144.306	118.331	128.785	223.437		12.3184	16.2874	30.5417	12.269	22.94	18.9244	29.525	18.3351	22.618	20.1946		214.06	183.851	124.352	143.096	171.728	153.71	136.606	122.678	123.029	82.2326
171.727	238.444	114.796	299.871	246.366	239.257	154.079	177.089	186.8	237.323		308.129	308.328	234.183	209.578	186.461	131.2	145.837	129.23	132.611	224.035		13.038	14.6685	28.0005	16.7605	18.3933	19.7661	32.6735	8.49018	23.7661	20.5481		213.52	178.242	116.216	155.434	174.162	152.202	134.296	98.5403	114.628	84.9816
169.082	230.379	83.0595	298.932	249.535	240.696	147.882	170.155	197.376	235.966		291.998	332.048	243.771	201.058	189.055	108.709	147.552	135.58	125.816	211.52		13.4373	16.0725	28.5628	21.2696	19.8719	20.6385	31.9742	5.31158	22.1148	19.2889		219.636	171.398	105.429	174.508	172.792	142.668	137.524	110.442	112.862	91.3324
174.565	219.458	63.2429	285.228	249.458	249.55	156.941	175.251	207.091	236.855		281.121	351.645	253.874	213.599	187.993	109.425	142.664	131.055	107.547	203.153		13.3209	17.4967	27.5435	22.6837	21.1785	21.0315	31.6029	1.71852	24.4025	18.235		221.768	183.58	95.8622	182.844	154.621	139.463	141.836	92.5798	101.805	87.321
196.783	218.891	46.2963	274.595	249.324	259.031	162.207	186.903	224.009	234.059		265.55	370.777	264.045	223.617	188.474	137.234	142.13	130.756	138.263	203.401		13.3492	16.522	22.7873	20.7762	18.152	19.8925	33.9962	8.83168	24.6608	17.3319		221.034	191.241	95.8622	190.818	143.609	130.633	145.805	101.189	98.6596	93.1007
205.996	210.759	44.6767	276.329	247.155	256.547	160.108	196.147	225.596	229.711		258.587	385.024	273.667	240.063	182.267	162.563	157.033	128.897	143.366	191.378		11.7895	19.5914	21.7149	18.0578	18.2637	19.5822	37.8109	16.0442	27.0187	14.2302		220.696	186.346	85.248	192.927	141.45	134.099	166.961	105.571	107.768	94.7879
212.588	203.831	35.0401	272.318	244.019	249.118	155.739	206.305	228.507	218.873		247.487	400.443	312.348	253.99	156.365	172.173	147.49	125.417	154.034	186.722		12.7294	19.7793	20.2466	17.6555	16.8353	21.4888	41.373	27.049	28.0524	14.8095		214.306	186.857	76.2958	189.811	142.478	134.844	172.482	96.7585	103.019	97.1882
210.038	209.618	34.7796	269.674	251.054	248.101	158.362	206.014	222.403	214.888		229.361	426.229	323.909	259.157	151.058	191.578	151.875	125.257	163.151	187.087		14.6337	18.4819	21.6227	15.3485	17.1803	23.5228	41.8114	29.43	25.6523	14.8783		217.466	170.158	76.0808	195.571	152.858	133.451	181.265	98.7006	102.092	100.321
194.285	199.805	27.1244	267.226	249.563	254.124	160.677	211.384	221.877	205.494		235.518	447.577	323.527	276.539	152.299	212.056	138.849	122.686	171.398	184.606		13.2629	18.7283	22.303	16.3622	19.3056	22.0195	44.1508	27.4906	28.8096	15.2103		216.559	163.148	83.7886	197.177	144.464	127.661	187.011	91.0967	93.2799	101.275
202.085	193.269	31.3571	260.198	250.723	257.28	163.016	214.576	211.464	208.264		230.408	474.687	322.618	315.68	150.109	245.306	133.154	125.433	177.767	189.314		13.2629	19.1082	18.2343	16.1289	16.3925	22.7751	45.4991	30.0113	27.0013	15.7856		214.58	168.966	79.8887	192.25	147.462	120.327	200.372	79.5402	91.3238	102.581
205.398	206.122	38.0182	262.797	248.076	263.86	173.012	211.247	202.368	206.986		227.272	500.074	312.368	322.352	146.255	245.06	131.762	136.906	186.877	176.659		12.8578	20.0325	18.4896	14.3373	19.9898	21.836	44.0867	29.5706	33.4427	15.4378		214.637	166.071	90.7714	187.462	149.754	117.169	211.538	84.3926	91.3833	102.735
189.638	232.101	37.6159	257.323	235.478	269.56	180.35	221.727	198.48	203.797		237.901	506.06	303.348	339.469	139.047	251.621	127.179	135.375	183.442	177.575		14.4791	20.1118	18.4418	13.7078	17.6272	22.3103	43.0724	28.8954	38.8505	16.3694		203.697	167.597	97.7739	176.66	152.242	116.819	214.754	68.9208	89.4457	101.295
188.404	264.612	39.3873	261.004	230.063	263.854	183.682	223.374	199.246	197.587		242.806	527.487	292.024	330.306	163.757	241.122	122.286	143.185	181.797	191.622		15.2139	19.0136	18.2514	11.7926	17.1434	23.268	39.7559	31.8105	38.7546	18.3603		201.897	154.565	98.5774	173.558	161.561	110.295	223.54	76.9717	87.136	104.804
168.271	267.419	37.9945	262.887	224.13	254.155	184.246	224.023	189.176	194.213		255.484	528.466	275.582	328.523	154.362	203.624	118.056	150.664	151.434	186		17.4933	19.2575	22.8275	12.768	17.8885	22.615	39.9372	33.5431	40.7465	19.1037		190.573	148.296	98.5774	162.589	155.562	112.441	223.561	59.4878	88.6504	99.3009
160.501	280.282	34.1197	255.037	220.487	254.18	182.44	227.954	188.121	190.918		261.155	540.572	253.237	319.263	157.141	177.009	115.767	162.081	150.155	190.594		18.6542	19.5992	22.3857	13.9027	15.6614	23.5624	35.2134	34.4304	40.35	21.7147		183.404	150.428	109.192	164.974	162.133	117.068	197.362	53.4171	76.2111	102.374
157.693	286.299	34.0672	254.176	217.614	258.534	178.077	226.058	186.601	184.812		263.157	545.476	191.449	310.444	148.247	113.314	115.616	175.556	140.416	185.243		18.03	21.6022	23.2393	13.4161	16.9517	21.1484	31.8963	33.7253	43.2481	20.4192		183.572	147.469	111.685	167.494	168.56	113.187	173.206	63.4336	78.9515	103.249
156.006	289.804	33.472	256.051	210.596	255.287	167.184	227.822	190.629	179.541		273.938	532.701	180.891	307.374	136.381	71.3728	106.971	188.166	140.166	181.645		18.4254	22.4349	22.9106	13.2747	16.9514	19.233	32.8016	35.3188	45.6481	19.6651		174.251	145.709	115.12	161.14	162.079	119.345	161.307	60.2409	71.3374	105.029
169.1	298.871	34.5503	263.25	211.339	242.645	163.127	223.39	191.213	173.118		271.516	520.873	178.866	292.108	133.334	37.0948	98.8462	210.725	142.452	175.503		19.0921	22.7576	24.6528	12.5296	14.097	21.0968	29.2043	35.8682	43.3738	17.9872		174.706	147.238	111.823	164.056	165.039	117.093	153.023	89.6331	78.0123	106.62
165.22	299.163	43.0221	268.792	210.617	233.68	166.166	222.616	201.39	167.59		274.383	510.674	179.595	252.624	130.115	18.3927	99.4483	219.133	144.693	166.731		18.0343	22.4157	28.7837	15.3982	13.6984	20.5034	26.6459	38.9767	44.6105	19.9707		175.456	140.17	114.113	163.86	157.658	123.292	149.132	93.9142	77.4367	107.393
176.012	299.614	49.1884	272.904	210.341	225.757	158.636	232.444	211.849	167.001		278.61	496.153	189.262	252.332	126.436	41.2596	94.843	217.38	149.54	175.607		17.7703	23.4677	28.8887	16.8092	10.6667	20.0285	27.2087	41.1926	37.9755	19.5893		180.048	143.085	110.809	163.62	170.155	126.88	138.657	86.9003	69.0856	108.872
185.977	281.938	56.3278	276.224	215.927	218.166	147.426	228.373	219.639	160.635		267.255	494.467	206.547	244.669	128.728	60.4396	99.4643	229.562	149.523	174.432		14.9476	24.6527	27.646	16.5938	12.9849	20.0027	25.9207	45.9801	31.2183	17.7476		199.831	142.373	112.11	174.006	172.639	120.203	133.142	82.7909	64.4134	109.412
178.593	277.098	8.26211	280.201	210.017	214.274	129.446	228.019	221.456	156.267		267.939	473.2	212.48	255.189	113.177	85.5129	99.0152	229.802	151.96	163.072		16.5176	26.4648	29.3945	19.9358	14.4431	20.5903	31.9313	46.0329	35.7155	16.7887		202.47	144.995	118.604	172.972	165.748	120.886	136.051	73.6622	65.6537	110.029
183.554	274.499	41.2291	281.356	213.825	218.431	119.203	223.813	231.861	145.489		255.172	478.815	219.172	254.967	130.454	96.5482	102.667	237.235	147.365	162.419		16.848	27.0169	26.3552	19.1339	14.1016	22.5913	30.8448	43.2995	34.2377	16.6914		219.587	150.508	118.857	182.346	170.685	111.312	140.536	81.668	76.6758	115.917
185.951	273.884	91.0704	295.523	216.545	219.196	114.95	223.139	237.713	135.459		245.29	462.751	240.742	267.613	132.793	111.637	109.781	232.453	144.568	153.241		17.9791	25.8748	26.6322	20.88	15.7819	21.2914	31.5549	45.1777	33.7873	15.0728		228.734	165.942	110.426	173.965	161.359	95.375	140.702	95.6011	88.832	114.546
184.482	275.135	139.387	301.494	211.148	220.788	117.756	230.931	245.566	135.762		239.57	456.623	307.595	275.732	147.568	96.8998	102.779	224.81	146.573	158.494		17.6842	24.8908	24.2341	22.8222	15.6958	23.7607	34.4081	44.5735	33.2977	15.1274		233.752	170.979	111.499	169.315	154.705	107.62	143.054	96.4933	81.7881	111.478
206.655	273.563	173.607	297.182	207.523	221.711	131.645	233.427	242.822	135.377		239.022	449.144	315.696	286.766	186.278	103.784	110.658	223.089	139.666	150.929		15.7708	19.1502	23.3245	23.1907	18.0381	25.1747	31.8902	42.1298	31.1135	16.3707		245.434	165.528	113.49	169.622	155.098	99.1731	149.525	117.462	91.9599	109.386
196.381	272.401	209.516	296.419	201.137	232.235	135.118	235.429	242.082	141.573		248.755	451.53	308.298	332.173	189.997	108.231	121.596	199.225	128.23	169.012		15.9547	14.5166	23.2677	23.4335	18.7198	24.6068	26.7662	41.3755	33.2253	14.9603		243.457	149.533	110.901	169.645	149.034	119.879	145.268	105.057	98.1024	111.136
195.932	274.735	250.258	294.807	199.948	233.364	131.705	227.54	239.467	135.149		243.974	460.072	307.789	340.845	193.842	112.267	132.081	191.872	123.599	174.106		17.0125	9.78151	19.5656	21.0318	18.972	25.4004	18.204	36.1844	30.3785	15.1548		243.78	185.17	112.594	173.646	152.256	112.044	148.766	113.268	93.1735	113.92
188.861	256.495	292.624	296.259	200.955	233.098	135.214	220.045	236.009	135.659		242.827	468.011	284.504	348.111	205.181	111.232	145.445	183.251	143.096	159.962		18.0332	4.12238	16.2363	20.4477	20.9018	25.6248	11.093	33.4957	31.435	17.2633		238.666	183.684	106.263	178.468	128.319	116.569	169.565	124.64	113.559	112.024
183.836	247.416	333.488	300.294	197.354	230.657	143.433	228.393	234.849	139.027		253.652	457.861	277.411	345.043	203.897	117.409	144.604	179.828	149.44	163.002		17.9512	3.86848	16.9529	20.645	18.5659	26.6947	3.08781	29.8976	36.8704	18.9743		224.82	188.438	103.581	169.302	128.509	123.459	186.704	127.477	111.261	113.658
188.659	237.509	316.434	299.561	201.609	236.969	160.106	229.942	235.456	141.582		240.874	467.164	278.518	328.402	196.358	112.607	161.237	182.085	148.035	161.791		14.9403	10.2032	15.7278	18.6677	16.0666	27.588	7.14859	28.8095	30.8546	19.2065		218.754	182.656	97.1653	169.952	133.426	123.284	206.785	150.68	121.566	111.076
190.683	240.055	293.61	308.551	202.651	238.322	168.393	228.364	225.446	148.658		253.067	459.266	267.155	321.229	191.541	112.926	159.129	176.956	153.96	171.386		13.8925	14.769	16.9162	19.7477	16.2193	25.9701	15.6496	28.9821	30.4722	22.2655		203.988	181.075	90.5248	161.009	136.067	129.276	214.813	141.306	113.883	108.304
194.923	244.42	252.763	304.767	203.857	236.611	166.879	218.583	216.979	152.564		256.49	452.343	256.002	304.299	205.929	104.829	147.875	184.544	153.532	190.105		11.3123	21.8705	16.5014	18.0471	15.65	24.7129	22.6586	27.2507	31.3046	20.5975		197.78	167.482	92.9188	158.601	146.819	132.869	219.817	138.135	114.84	105.367
201.463	247.794	215.25	299.847	212.427	235.456	167.413	206.891	205.785	152.066		255.554	429.624	203.296	289.347	208.854	105.197	150.867	184.322	154.122	194.965		11.8889	29.6897	19.2541	15.7981	15.7391	24.1682	32.0831	28.1007	25.5492	24.0541		190.811	167.073	89.9415	156.406	150.179	121.967	214.665	132.147	130.25	106.822
174.454	253.951	187.121	300.405	215.772	237.99	159.241	205.217	199.413	152.607		248.422	425.937	188.702	274.7	175.859	108.376	151.589	185.144	156.293	211.924		11.8862	30.1811	20.8477	16.3757	14.5014	23.4469	42.3653	34.0281	28.3552	23.0615		183.644	184.84	86.759	152.868	153.9	126.87	212.989	116.609	137.475	108.162
176.089	266.044	162.835	294.77	225.389	238.297	158.894	204.877	189.849	143.561		231.523	424.514	184.091	238.411	173.297	104.529	147.296	198.243	160.824	203.265		11.2597	29.2431	22.7026	17.2552	15.2843	24.6005	42.0501	35.087	26.9868	24.6764		189.198	203.36	85.7407	155.271	167.341	110.037	213.362	102.935	137.154	105.303
179.825	270.102	135.707	292.783	230.913	240.154	159.255	209.228	188.384	146.001		217.754	412.152	178.032	230.495	176.393	94.4283	141.712	204.611	160.765	207.519		10.0823	27.7212	23.3971	18.8819	17.3979	23.2504	36.4789	33.4254	29.6852	24.453		189.416	174.324	83.252	151.632	169.311	117.483	208.491	96.7533	147.018	99.4491
179.711	278.399	110.84	288.882	234.108	236.295	155.405	209.007	189.863	142.322		190.034	396.257	193.747	222.737	175.119	98.7313	133.846	220.832	130.911	222.736		10.0493	28.7231	19.6727	19.1409	14.7874	23.5009	37.6056	35.2257	29.196	23.1825		196.209	161.032	87.9124	151.757	185.497	111.154	192.488	92.2251	135.869	104.221
185.932	275.019	83.91	282.068	240.214	238.797	159.592	196.316	189.934	138.826		152.704	391.584	188.819	228.826	177.964	93.1357	137.244	220.261	121.015	226.829		10.7458	28.6326	16.2041	18.8875	16.358	20.9544	35.7066	35.3657	29.2691	22.6744		195.513	154.373	93.0774	166.486	181.965	110.17	177.459	95.8701	157.038	105.885
192.303	269.598	59.4898	276.638	242.203	237.07	156.771	195.797	193.375	139.818		131.599	369.089	196.76	244.231	176.515	99.9428	121.812	216.635	120.97	237.753		10.1839	28.5	11.5568	18.7696	18.7858	21.9401	38.3667	36.509	30.9872	22.168		191.906	157.757	92.8059	176.254	183.908	114.92	151.588	73.6338	151.537	107.027
202.223	272.651	34.1017	266.921	245.945	233.333	156.171	204.835	204.715	135.143		85.8711	380.614	209.063	252.601	173.012	107.03	126.196	224.629	113.559	235.568		10.0169	27.7376	5.34509	17.9308	17.3649	23.2868	36.6144	36.6542	32.0373	18.6051		202.596	142.579	91.6937	188.921	191.624	111.774	135.864	71.6447	141.858	107.075
203.151	276.069	29.1708	263.829	241.746	230.567	156.446	206.979	205.9	132.153		46.1523	394.099	248.045	268.647	152.548	122.763	129.471	216.131	116.093	230.315		11.2528	24.6907	2.63859	20.4831	20.6164	23.8323	37.2656	34.7977	31.2415	21.9712		202.213	140.082	89.9235	197.183	201.585	112.147	133.704	71.0067	136.614	108.876
216.257	278.713	32.4909	260.46	240.874	232.763	145.102	213.282	205.46	135.478		6.60919	411.201	268.327	276.37	143.627	131.187	133.779	225.048	113.187	230.539		10.8417	22.4127	2.55178	20.9853	22.5812	24.6543	40.2582	35.2795	35.5585	18.9181		205.287	136.577	92.4968	206.323	203.079	112.56	136.234	67.0769	133.08	108.327
252.886	272.708	40.7476	252.2	242.893	232.706	137.282	208.646	209.271	134.16		51.8637	423.726	266.535	319.207	148.841	143.313	134.417	217.255	102.653	231.99		11.6393	20.9082	9.15488	19.9607	22.2098	27.3637	36.3005	29.4256	36.9347	19.0998		207.861	123.632	100.344	217.139	200.239	111.757	153.812	75.3905	120.876	108.445
280.532	261.935	53.1303	252.615	235.627	224.4	136.94	208.747	211.161	142.711		109.242	421.444	276.224	317.636	159.418	150.411	132.958	214.934	101.566	232.327		13.1134	20.9978	16.868	19.9638	22.9023	25.9889	38.2062	26.4365	37.8705	18.0697		201.426	138.571	107.248	218.12	190.618	121.755	155.939	107.724	124.258	108.427
322.707	259.898	71.7451	251.922	233.771	225.435	149.599	213.56	207.409	145.275		167.283	417.766	279.266	319.909	153.441	159.795	131.637	215.084	114.143	234.134		14.856	22.1733	23.4774	19.3156	20.8664	25.7095	41.8806	29.8977	37.972	14.4446		205.575	129.374	109.728	226.396	185.692	120.133	157.019	100.101	119.652	111.482
356.566	254.128	97.7828	244.383	234.705	234.443	153.366	217.873	194.08	143.26		194.48	415.563	277.764	314.622	146.482	166.205	133.943	201.247	117.173	230.514		14.1246	21.7134	22.2864	19.1669	21.6617	24.7737	40.9302	28.7716	38.9306	13.2873		196.011	142.983	111.956	227.661	174.73	116.766	163.103	100.614	121.8	109.72
373.704	251.284	108.975	244.09	233.273	239.757	156.82	224.264	185.134	138.323		228.278	413.194	280.403	306.757	149.435	170.925	134.529	195.785	122.045	227.608		16.591	20.2437	18.8178	20.2907	22.3188	27.5245	43.2732	29.0879	39.7744	12.7298		198.337	145.831	107.336	217.366	174.779	112.297	158.34	116.299	99.8011	107.585
378.317	249.656	147.598	245.42	237.658	241.706	153.923	221.689	173.583	131.23		260.083	423.367	272.149	293.641	150.159	169.341	135.566	197.574	118.486	221.804		18.3098	19.2841	14.3505	20.9999	22.7146	28.0193	38.7693	26.3047	42.5516	11.1829		197.376	149.8	114.851	210.242	170.001	107.978	157.168	129.724	94.7675	111.378
379.829	242.67	192.792	244.533	233.542	242.669	156.609	219.583	159.623	129.385		291.55	411.245	264.25	274.769	153.478	168.185	130.676	186.63	123.89	220.718		21.9273	19.7762	7.01382	23.5176	22.3165	29.4309	43.3346	27.8934	43.9248	12.0253		190.74	169.342	116.153	200.182	155.904	115.444	147.638	136.139	92.7558	106.468
395.365	236.765	229.603	241.385	242.518	244.693	163.002	217.427	153.789	125.381		312.283	408.084	219.95	264.422	161.273	163.509	135.966	200.325	119.362	215.719		21.2964	19.611	3.43557	22.1239	17.8094	27.9479	43.6582	28.9299	41.747	9.8063		194.238	167.691	120.598	191.831	138.542	129.024	141.917	131.727	87.5723	108.086
389.822	228.706	254.897	245.292	244.321	239.086	172.097	208.517	147.955	119.604		314.654	383.055	209.906	252.954	159.017	166.126	142.084	199.68	121.982	216.802		20.4023	19.9042	1.66007	24.4506	15.7533	27.0089	38.5555	27.7268	40.7768	10.0074		191.827	169.286	119.005	182.247	135.183	131.977	141.657	153.346	84.7528	108.168
387.512	224.068	280.361	243.762	244.575	241.82	179.198	210.437	143.524	109.376		313.458	371.655	213.719	212.125	146.991	155.239	148.469	204.103	126.72	220.279		19.2108	20.3715	7.3018	24.6559	15.4684	25.3236	40.841	27.6277	43.2336	10.4213		194.045	174.306	112.1	174.692	145.98	123.921	124.794	153.86	81.2804	104.913
391.982	220.486	295.819	242.266	254.421	249.863	179.281	209.976	140.499	105.517		310.777	363.804	216.255	211.151	134.249	146.532	160.204	203.406	139.673	224.147		18.4701	21.9828	12.082	23.6873	14.4679	26.3337	38.1073	29.2972	43.2336	11.4514		200.953	157.536	112.1	173.577	146.455	128.192	132.769	133.024	69.7708	104.032
372.074	216.613	316.94	242.245	250.624	252.954	168.766	204.218	135.609	95.9728		301.242	367.187	224.781	207.454	155.809	155.086	187.836	197.98	139.898	224.923		20.8052	21.4149	21.5363	24.029	14.7223	28.1302	34.8764	26.0141	41.1026	11.5715		193.374	166.911	111.515	163.368	135.834	151.245	183.447	137.79	73.4529	99.023
352.255	221.093	328.065	247.795	250.995	247.245	167.999	191.056	134.525	98.4692		317.13	380.713	251.487	226.827	146.624	162.616	184.681	212.267	145.95	231.387		21.3684	20.4955	26.0682	24.3447	13.9232	29.3922	39.9009	26.5689	39.0839	11.8585		196.548	166.878	106.403	159.89	144.185	158.216	181.717	144.841	74.8912	89.8551
348.64	229.826	342.21	247.414	255.707	236.287	165.174	181.598	127.86	99.3258		322.655	394.605	259.463	229.672	135.322	154.051	187.867	222.839	151.429	237.796		19.8241	20.0761	29.2639	24.2936	12.9715	28.5991	36.429	26.4989	28.7305	14.6229		190.476	176.138	102.013	156.84	142.334	163.206	177.805	125.329	83.3663	85.1055
346.631	228.217	331.545	247.28	253.118	226.339	178.95	183.797	131.76	100.2		327.939	391.826	305.632	236.921	128.231	175.312	190.453	232.529	161.037	246.604		19.2713	22.2214	28.6497	21.918	12.1171	25.6563	40.5618	29.0789	17.2382	13.7703		187.929	170.423	92.8701	149.638	146.526	163.724	190.184	116.628	87.1371	80.7527
355.838	235.013	291.634	245.193	257.75	223.098	181.222	183.093	139.782	95.5747		335.7	395.148	309.799	268.725	117.909	162.739	196.927	245.206	164.417	246.973		16.0563	24.1191	26.9309	20.7419	11.9298	25.5047	35.8668	27.7087	7.22893	15.5369		190.503	163.137	89.9753	175.144	166.77	156.069	200.408	115.334	92.8411	79.8756
356.504	231.536	248.553	242.272	253.993	223.002	180.651	184.313	141.973	98.4719		325.427	385.568	314.86	299.564	121.266	162.738	203.364	240.853	174.319	247.888		18.3582	26.247	27.8213	19.4127	15.127	27.447	34.4663	26.6371	3.19541	15.2181		183.748	161.134	93.3359	183.771	166.966	143.494	202.949	117.125	94.4636	73.1908
364.556	232.317	204.536	240.48	255.126	223.677	182.117	187.606	148.934	99.5984		339.235	384.781	293.928	307.198	150.759	154.922	198.702	240.665	176.237	249.837		18.8576	25.9538	26.0051	19.2733	17.3175	26.5082	38.544	30.0106	2.14889	15.2645		189.596	157.982	100.72	190.954	168.381	141.176	201.186	103.69	89.1324	68.1996
353.276	232.447	154.357	236.781	254.693	221.3	179.96	188.119	153.102	110.13		342.633	372.498	295.527	315.068	158.341	176.622	194.818	240.173	182.605	241.847		20.1702	26.5889	24.5103	19.0057	18.2979	26.6907	38.4747	37.0333	17.6179	15.7432		180.653	147.233	107.625	197.206	165.512	143.542	199.756	103.621	96.9937	62.6573
335.68	232.365	104.792	233.947	251.613	217.479	175.441	186.882	158.852	110.8		351.268	361.749	288.531	313.152	167.763	177.373	189.205	238.196	170.582	238.762		23.2239	27.0312	24.0997	18.235	18.9404	25.2844	39.9619	40.747	24.6197	17.0834		174.353	144.973	100.038	196.75	178.045	129.18	193.037	104.875	101.567	57.9808
317.546	233.64	35.9685	226.049	263.629	216.804	170.053	194.522	165.388	121.622		362.263	349.92	279.547	317.401	146.341	165.736	163.117	238.35	151.305	242.929		21.2606	27.7235	22.4233	18.4942	20.3507	23.1038	45.5853	43.3089	30.432	19.8538		176.498	139.893	93.8572	204.464	201.872	108.562	143.177	119.106	102.868	58.2374
313.572	234.101	25.7114	219.395	264.749	217.776	163.519	200.63	171.312	122.562		352.277	332.996	261.212	292.826	155.275	160.297	166.988	214.225	146.41	242.912		22.0519	26.8703	23.0057	18.3063	22.0697	21.3693	42.0692	42.9117	37.6016	22.2514		179.586	138.675	98.9701	205.664	205.197	110.49	140.074	117.502	104.036	58.2632
310.389	226.835	73.0891	212.564	265.394	227.164	152.481	210.425	180.134	129.127		348.298	329.961	249.363	285.482	160.78	168.217	158.551	195.723	132.709	245.955		20.1885	26.3394	19.254	16.5281	21.7963	23.6042	42.4452	42.918	39.6877	20.859		183.476	126.253	107.98	208.931	214.004	110.695	139.368	130.891	106.466	56.713
312.613	224.526	127.612	201.529	272.198	231.999	138.523	203.473	177.852	132.153		340.987	340.633	200.748	280.798	161.662	150.896	163.251	179.483	139.038	235.957		20.5021	24.9832	19.998	16.6813	21.7285	23.9835	39.0138	40.8447	38.5528	22.8533		192.775	133.406	109.958	216.89	209.658	108.79	126.162	137.982	111.297	54.3745
308.015	214.454	149.211	202.324	275.266	240.579	138.828	201.068	169.95	137.766		314.584	324.889	204.19	258.149	163.606	170.52	160.23	164.936	132.891	234.462		21.403	24.2527	20.3693	15.6794	22.8938	25.2667	38.5005	39.9037	34.9023	20.2859		188.412	145.153	108.642	195.925	199.814	112.671	127.934	142.957	110.267	56.3943
298.672	216.736	160.297	189.037	279.356	241.618	139.509	204.597	168.042	138.614		294.829	320.702	213.014	225.317	181.713	160.57	149.374	164.6	134.196	240.742		19.004	25.0499	20.1243	16.2293	20.3234	25.2984	37.6261	43.1209	37.0459	20.1148		196.222	141.867	98.8057	194.568	211.377	107.463	144.328	142.02	112.427	59.181
287.518	216.581	174.051	182.254	280.272	239.163	137.564	206.998	162.608	142.009		274.538	329.208	238.203	226.197	157.875	176.449	150.605	153.928	142.031	235.522		19.0187	24.9838	22.0607	14.987	18.4394	27.4528	33.0287	44.1963	32.1582	20.7973		190.654	148.372	98.8057	186.092	216.899	107.831	154.194	140.602	121.686	59.3113
271.908	223.332	174.025	186.024	284.971	240.277	143.637	203.808	161.957	143.96		254.959	348.059	252.94	223.989	155.204	175.898	144.525	152.622	138.792	236.244		17.6198	24.0093	23.2664	14.7198	20.7205	26.805	31.3689	39.0271	21.1439	19.5654		197.884	156.901	90.471	178.121	217.06	110.824	163.613	142.423	125.796	58.9481
266.108	227.215	170.05	182.531	287.191	240.859	143.961	197.877	162.472	146.359		239.336	366.766	269.073	228.469	150.315	198.344	148.539	150.662	133.865	234.988		17.4112	22.9308	23.1684	15.2677	21.9484	27.2108	33.5446	37.009	12.2611	20.3729		204.908	154.115	89.2618	173.868	213.351	116.421	148.302	126.772	125.69	61.4725
282.206	233.37	161.149	184.723	281.899	236.674	146.243	187.995	164.878	146.131		211.483	363.008	285.949	232.099	164.127	213.509	146.869	148.932	137.254	230.425		16.4742	23.6055	23.6888	14.3742	20.0103	28.5084	29.0929	36.6752	6.55939	17.9023		205.885	167.105	100.843	165.357	204.838	113.468	136.074	107.717	122.428	62.9535
268.074	234.791	156.147	184.424	285.605	231.684	145.409	194.688	167.577	153.426		184.813	371.44	330.725	281.758	173.989	216.579	139.897	159.307	131.098	229.442		18.3938	25.7078	23.4262	14.8227	18.7611	28.4565	25.8807	36.7121	6.32518	16.108		203.625	168.145	90.7954	171.458	200.86	107.643	130.378	131.364	118.692	63.3976
261.602	246.801	151.521	178.53	283.09	224.357	153.455	187.81	162.919	157.068		150.9	364.848	328.89	291.596	176.481	221.716	158.621	169.873	136.981	223.022		20.7775	25.0056	24.5891	15.9483	19.4726	27.9292	25.9608	37.7282	13.8971	15.282		202.917	175.216	81.0343	168.939	196.552	120.913	136.363	134.15	123.604	65.671
256.667	256.09	138.088	173.545	284.952	216.607	154.801	180.767	161.75	163.181		114.914	351.6	325.138	300.082	188.753	226.691	152.518	168.368	126.972	228.728		21.2566	18.8515	23.9632	17.259	18.8352	28.3666	28.0792	42.5624	21.3737	13.5286		197.017	178.058	89.6405	158.87	200.297	125.155	135.377	136.942	116.01	64.2029
243.759	259.014	127.616	162.419	280.911	205.662	148.241	171.766	158.151	166.563		92.4562	352.428	316.627	305.021	203.416	225.129	178.713	174.039	161.006	237.723		21.8189	12.4713	22.997	18.0241	23.8548	26.2804	30.7071	46.1511	26.9994	15.8147		205.46	166.35	89.2615	161.195	200.592	113.932	133.394	139.869	112.019	58.5668
239.847	262.746	118.298	174.116	279.847	197.637	151.009	162.181	161.403	168.771		89.2519	351.973	294.866	304.042	189.399	258.653	184.493	180.021	160.805	244.323		25.3906	6.44274	23.2459	19.3441	25.2464	25.3746	35.5768	42.6291	34.6184	16.459		202.255	179.651	90.3414	159.25	209.453	124.658	135.431	135.482	116.83	59.4454
233.133	269.788	103.847	172.788	279.272	198.493	147.447	157.699	170.683	173.627		81.1701	351.242	289.561	284.039	178.267	231.588	183.922	193.236	151.571	251.619		26.8553	1.98018	22.4978	19.604	24.4935	22.3312	39.2375	42.2382	35.0119	14.5931		203.729	183.054	86.1678	172.756	211.406	124.366	127.377	148.855	105.778	57.7715
230.3	270.978	105.863	162.099	276.929	196.673	143.059	155.15	168.829	170.684		69.0026	343.482	269.191	265.499	181.238	227.963	190.989	217.672	152.938	246.976		27.1082	2.67645	21.4941	20.5468	23.2592	21.3166	38.0832	47.0416	36.5541	18.2715		202.045	191.999	94.6759	179.165	209.28	125.56	118.919	145.588	105.011	58.6787
228.752	271.123	109.214	165.138	278.572	201.298	139.112	160.961	168.151	164.82		49.8688	342.065	261.742	248.136	187.898	236.445	187.444	234.932	161.069	232.127		24.392	9.85054	20.6854	19.6781	20.9235	23.1633	37.3988	49.4616	34.8126	15.4995		191.523	204.932	105.222	179.505	202.934	124.575	129.038	146.355	103.521	56.6163
213.012	271.563	108.181	165.69	282.91	201.305	130.811	159.721	167.452	163.688		43.9919	357.517	248.707	240.069	180.825	210.115	192.079	248.756	168.97	230.919		22.9628	15.6292	19.2394	19.0031	21.74	25.1891	36.5209	48.4122	36.6757	17.6322		188.463	193.108	97.866	186.49	213.222	124.599	137.234	154.118	100.611	57.4814
227.784	272.784	108.06	165.38	281.968	199.502	132.303	149.339	163.695	159.236		47.3105	349.575	202.876	211.78	185.216	205.352	196.854	250.495	182.947	219.902		21.54	21.311	20.3308	18.8341	24.3532	24.4554	38.2895	51.9166	32.4011	18.3175		186.015	191.451	101.466	180.369	209.207	157.442	142.101	117.898	90.1444	61.8734
233.231	259.595	111.662	171.523	284.283	200.388	130.142	148.785	173.286	160.618		52.6467	340.465	216.613	202.767	187.993	216.017	180.783	256.587	186.261	209.9		22.2103	24.2054	20.3895	20.5014	24.7013	23.0971	37.7153	51.2702	33.3254	17.7234		188.095	185.836	103.727	184.404	206.174	142.744	134.01	99.4554	86.3675	58.9646
236.981	249.406	126.415	175.861	280.073	203.961	126.457	154.83	180.131	161.249		44.2159	335.955	228.167	190.78	184.961	225.848	182.753	265.36	189.704	204.788		20.3101	23.0518	19.8235	20.5281	29.4221	22.8495	30.6009	49.1333	32.3018	20.1248		190.537	183.313	93.4359	196.952	201.999	144.944	131.843	73.0655	86.853	59.8918
243.2	248.563	139.38	181.18	279.602	207.369	127.267	154.365	187.928	164.971		34.1222	346.524	240.098	180.147	184.941	219.628	159.476	265.378	162.616	192.614		20.5625	22.7384	19.1441	20.3494	24.1844	23.6401	18.7197	48.5205	35.9558	20.7654		176.453	181.793	105.125	192.388	191.189	156.804	126.043	28.9747	85.8812	62.0387
240.764	243.017	151.406	178.183	276.817	208.927	116.252	160.667	188.766	168.774		18.6494	354.959	257.867	183.705	181.507	186.636	158.678	260.276	151.203	166.43		20.5841	24.5413	18.7839	19.7777	23.2697	22.5324	9.57141	54.3513	34.9226	23.3415		177.501	169.547	112.291	194.181	180.851	157.56	109.367	18.7201	73.931	56.5954
237.83	228.879	166.786	170.74	270.224	206.262	108.929	158.332	182.209	164.762		2.42362	354.847	268.813	205.408	191.119	204.206	157.6	255.993	151.53	184.651		21.0582	23.723	19.6488	19.9653	26.6817	22.6587	2.5891	49.225	33.8967	23.5262		173.713	175.53	111.201	183.106	162.212	158.045	114.882	45.974	83.3424	58.9867
222.738	221.854	174.022	183.408	269.923	201.145	99.9043	159.44	188.879	163.917		24.7574	358.789	288.747	214.983	185.252	185.124	150.514	240.15	150.383	165.333		20.509	23.723	21.1631	19.6763	24.3291	23.8956	8.85371	43.7463	35.7353	20.8481		174.974	174.231	108.571	174.906	176.839	165.082	145.582	102.93	76.1422	62.4415
201.485	216.128	178.354	189.253	264.145	192.337	93.6299	149.111	188.165	165.417		48.8055	354.317	289.594	233.077	183.443	163.062	153.253	229.163	168	198.028		19.6339	20.625	21.5648	21.1039	24.3486	23.1448	16.8942	42.321	35.4102	19.9955		179.168	176.444	106.821	173.966	183.813	173.921	157.672	129.636	68.2723	65.7256
178.391	207.173	177.584	188.067	253.411	193.917	89.7489	147.542	188.954	166.798		78.4962	344.782	305.926	244.42	179.618	178.757	145.592	224.813	156.426	194.79		20.1458	19.6418	21.6594	21.1884	23.5264	23.2864	20.3031	39.9746	34.3476	18.7414		178.929	180.91	110.542	168.275	187.183	181.796	164.075	150.763	66.4981	68.5448
158.116	191.231	179.675	189.139	247.584	205.37	83.4776	151.016	195.064	163.726		109.131	350.564	310.137	239.553	168.34	185.412	140.156	228.927	148.313	191.665		18.9818	19.9376	22.4096	22.2042	19.9689	24.4826	26.0378	35.8241	34.2199	18.0757		181.133	179.489	112.167	163.215	195.401	149.455	162.139	193.196	72.3527	64.6714
139.745	191.334	179.75	190.131	241.031	215.124	80.6487	150.61	187.62	159.798		153.102	351.464	295.894	250.971	170.07	178.29	139.624	222.439	151.944	202.257		17.6576	20.2896	21.824	22.8481	18.6994	23.4063	31.0973	39.4804	32.1247	17.5329		173.921	186.51	111.741	160.752	194.943	156.277	178.837	212.192	62.8127	64.956
120.432	195.901	171.87	198.644	238.83	214.215	80.0077	155.231	186.537	159.848		176.626	352.495	283.746	289.474	169.169	178.837	139.912	220.583	158.285	195.098		17.6882	19.0949	23.343	23.5507	13.3267	25.4322	33.0708	41.6061	33.8829	15.6398		172.072	188.533	126.66	154.321	199.494	150.753	178.832	211.723	64.8169	62.9569
106.544	201.526	167.852	192.736	234.916	212.345	71.6585	154.521	187.447	162.754		202.353	343.499	263.759	300.165	176.642	176.903	136.715	220.705	158.775	215.881		15.0996	19.4505	24.5718	23.1882	16.1794	23.9184	29.9907	39.3631	35.9684	15.1412		180.235	191.765	115.459	147.717	206.909	151.899	175.595	194.242	63.1582	64.6982
95.0638	205.495	168.037	194.687	232.847	218.661	90.2862	149.68	182.135	162.494		227.626	334.014	247.358	304.922	180.238	214.212	136.574	214.997	170.827	224.463		12.1481	17.7941	25.209	23.1185	15.5149	24.5465	30.1037	33.0216	40.6488	11.832		178.683	200.624	107.137	140.998	196.588	149.564	173.552	165.395	72.5788	68.8573
94.4249	204.271	159.114	196.043	245.542	222.929	96.6872	158.444	185.913	166.443		257.166	342.232	226.792	307.854	183.477	243.751	133.588	217.079	173.148	215.075		10.9418	18.7053	23.2355	23.4564	13.0525	23.4177	30.0915	37.7695	39.9589	14.4498		188.171	191.17	104.364	140.243	219.867	155.246	165.198	174.931	63.4163	70.7186
102.808	199.112	155.179	187.918	247.575	233.04	97.0465	156.178	175.623	173.118		274.229	339.486	208.571	315.201	193.047	242.49	133.415	217.21	176.151	243.385		11.3396	17.8695	23.0227	24.2081	15.611	23.0036	23.3429	36.7996	34.9892	14.2243		185.305	189.742	97.4989	142.555	212.653	160.891	137.686	155.105	60.4612	69.6561
114.883	192.023	151.415	181.907	247.697	243.189	100.595	158.24	167.704	178.799		291.034	340.304	206.473	306.15	192.888	281.019	130.675	217.141	159.726	229.146		13.8568	17.26	24.4187	22.7982	16.7594	21.4192	26.5152	34.8303	39.8374	15.1621		180.348	178.97	91.8893	137.172	215.064	157.48	125.88	157.717	72.5447	68.9944
125.089	190.371	152.973	179.048	258.317	247.052	107.596	162.644	157.264	175.063		310.568	342.543	183.032	300.312	184.763	278.398	141.329	211.92	166.727	235.662		16.1471	18.3162	22.7545	22.8888	17.4151	19.919	25.827	38.2083	38.1977	16.0146		182.204	173.091	90.3274	141.897	205.875	160.547	121.879	170.45	81.8322	63.7482
132.113	199.96	153.881	174.65	256.113	248.023	115.605	164.405	148.185	179.484		324.536	343.928	170.229	286.999	188.705	270.444	156.861	209.579	169.378	227.835		15.6962	18.8389	19.6763	21.1464	19.7964	19.4505	28.8714	39.3429	40.1196	14.9445		176.204	176.336	84.9241	155.648	202.197	161.971	117.298	165.667	86.357	64.8871
136.798	200.265	154.994	175.408	258.32	236.183	115.982	174.678	148.074	175.822		329.334	361.957	167.032	274.103	187.02	267.664	159.912	213.969	192.528	222.857		14.6252	19.1884	21.357	20.5986	19.2848	19.8625	32.2045	36.5572	42.3331	12.5369		181.941	171.895	86.5437	171.055	214.097	159.018	108.662	157.383	87.8612	65.6478
140.379	198.566	162.91	171.402	258.661	240.107	120.233	177.617	144.865	173.674		325.872	376.024	176.435	233.997	192.014	281.723	159.872	216.366	195.197	246.331		16.3765	20.3319	22.7554	21.0359	22.8603	18.3133	30.2181	33.6691	43.5532	10.2277		183.669	160.437	77.3818	175.514	216.277	165.062	122.364	164.476	80.3847	62.2789
140.063	190.777	166.721	181.011	262.446	239.866	127.615	184.296	143.39	171.53		323.101	384.137	187.737	228.285	177.566	302.73	161.19	216.099	203.726	237.077		17.3253	22.5252	22.062	20.447	21.9358	18.3352	31.6456	36.5374	41.1142	5.07463		180.078	157.236	85.6154	185.461	217.127	160.733	122.86	155.88	88.2515	60.8541
146.565	190.88	168.041	183.474	269.807	235.188	111.998	189.455	154.345	165.932		322.777	387.571	204.431	219.909	166.31	285.735	156.57	220.528	204.142	252.713		20.9301	24.5255	28.6977	19.579	22.7266	18.7415	31.1625	36.7545	36.9118	2.15299		182.332	152.936	97.9357	190.337	228.427	158.717	123.026	169.918	89.2012	53.8506
145.941	197.612	174.189	191.414	258.12	229.822	110.757	182.345	151.397	159.82		322.478	375.223	237.831	222.904	162.894	251.964	161.977	217.827	208.795	233.138		23.1497	24.3763	28.9376	20.0254	22.891	19.3785	33.1649	31.5934	36.3019	2.89357		171.787	148.69	109.59	195.486	215.429	158.511	125.594	163.807	102.255	49.284
147.092	200.339	174.974	202.729	255.649	220.84	111.826	191.869	160.722	153.089		324.094	371.225	233.752	221.99	161.001	255.498	160.824	209.959	206.242	238.393		24.3976	26.9975	32.329	19.6191	20.91	19.6824	36.441	32.6572	40.4028	7.63265		166.765	151.226	115.645	200.775	215.56	152.779	139.059	143.775	116.391	46.1812
146.023	207.311	176.741	209.657	252.435	213.862	117.454	194.694	169.341	147.782		326.742	358.383	232.456	230.455	162.136	205.991	159.297	209.775	199.721	263.404		22.9124	27.8472	33.2155	22.1009	21.1942	22.7014	33.5112	34.3225	34.0121	12.7938		169.381	146.967	118.201	212.483	213.836	165.26	149.014	122.624	118.197	46.4197
145.753	205.088	176.681	214.709	244.37	206.518	123.495	195.222	174.328	149.713		329.042	352.545	239.291	241.124	176.147	208.188	150.312	212.105	203.078	245.894		20.3287	29.2008	33.0715	22.1472	22.0254	24.5269	35.1694	30.8521	35.9886	16.6326		163.743	148.876	120.301	205.913	203.2	166.128	151.951	109.08	115.24	47.8751
147.774	204.813	176.619	225.105	242.507	207.126	122.846	193.508	180.529	151.215		333.677	343.892	255.929	248.105	173.248	207.12	139.652	214.545	206.862	268.967		20.7609	23.1783	32.5339	21.8227	22.0665	25.993	33.2924	29.1964	34.4846	20.9683		162.587	142.435	124.245	197.127	202.027	163.416	160.356	113.397	117.925	49.9513
150.41	204.471	182.663	228.814	238.107	213.782	126.141	185.133	174.092	158.656		328.688	317.743	269.2	253.793	174.331	207.948	134.616	214.027	182.024	269.553		23.2316	18.0546	33.0662	22.2551	23.4439	26.1301	28.6456	28.4707	36.4382	19.3469		156.138	137.335	130.105	182.396	185.964	160.143	168.642	112.565	127.745	50.7089
150.869	201.421	183.592	239.16	230.428	212.565	128.024	185.604	175.867	161.993		339.236	298.613	279.345	258.151	172.707	179.179	131.314	213.016	170.19	267.158		21.8257	13.7262	34.5104	21.8972	19.78	25.6534	30.5587	27.6427	34.517	18.8596		151.318	135.971	136.889	172.711	186.271	152.519	143.212	98.8388	137.79	56.99
152.206	198.966	191.538	247.168	232.091	206.184	132.584	185.939	170.669	159.473		340.233	301.056	285.222	260.873	167.603	163.026	133.02	209.374	159.071	254.498		21.8377	6.31788	35.0469	24.0976	22.0054	25.8978	29.2235	23.1879	32.3422	16.2375		147.356	134.926	137.099	164.891	187.339	163.17	150.72	101.521	138.588	55.9587
153.157	191.686	196.645	255.163	225.796	204.226	137.897	184.766	155.944	165.172		341.674	291.494	267.353	260.174	176.443	151.585	134.55	206.99	161.188	253.376		17.3729	0.783572	28.892	23.2623	20.6015	25.901	21.1603	25.2706	31.4237	12.895		137.882	131.75	129.862	158.544	174.953	164.862	146.012	77.3643	139.352	57.8906
159.696	189.903	194.121	263.388	232.279	206.744	143.188	194.034	153.583	172.012		339.903	277.661	236.347	265.54	173.137	158.416	130.464	204.348	162.205	255.344		15.2766	6.06345	30.5031	22.2261	21.9165	26.3438	13.2034	25.4433	30.5955	6.9725		135.52	132.171	123.57	152.017	178.468	160.235	147.651	71.629	133.948	60.8527
159.223	199.668	195.881	266.671	229.65	208.127	151.794	187.453	146.39	175.459		329.909	262.065	238.507	264.959	179.934	162.77	128.529	204.063	160.169	241.665		15.0895	12.108	27.1303	22.5351	22.1586	25.27	3.84614	18.4056	28.0835	0.549937		137.605	122.228	135.526	145.499	166.605	153.962	144.484	62.0259	128.266	61.5619
170.564	208.807	195.133	267.968	230.88	209.969	150.519	191.106	147.946	177.196		326.964	253.536	231.424	259.402	172.672	161.045	126.217	216.065	159.497	218.818		15.6934	16.2791	26.5767	21.2109	20.2842	22.9826	4.98102	9.71679	32.0561	6.25006		136.652	124.946	137.01	128.575	163.559	135.67	169.181	52.9097	125.472	56.8252
185.823	217.226	191.196	272.426	230.728	213.305	149.476	193.135	149.356	181.077		319.385	244.769	225.995	246.494	164.603	167.886	126.817	220.093	161.614	242.25		17.7772	22.9571	26.5061	20.7634	22.5538	21.4812	13.8179	8.06311	31.2363	8.58006		142.66	128.984	135.366	133.764	165.39	129.704	173.983	34.0383	125.321	54.9522
195.037	218.463	189.109	274.356	228.543	210.006	151.641	189.136	147.349	185.288		307.645	236.514	218.365	237.468	169.652	192.441	127.081	216.622	163.858	236.38		18.7078	22.9807	27.6594	21.1027	20.4732	22.229	18.9556	3.7201	31.5256	12.8202		145.853	129.025	141.352	129.308	158.482	134.521	186.584	9.10497	126.478	47.4948
195.929	217.611	182.827	276.168	231.081	208.876	153.289	193.982	157.522	187.984		303.112	238.632	204.97	234.41	170.303	199.242	132.292	217.21	164.463	231.017		16.4066	23.5946	26.4374	19.2875	19.1676	21.6954	25.1999	4.31364	31.7024	15.37		151.737	130.379	139.188	133.52	161.489	136.247	194.515	18.7874	123.09	48.9911
198.47	219.074	175.638	275.36	233.923	211.67	148.936	190.847	148.408	184.245		297.552	244.575	185.375	231.116	173.507	209.882	145.576	217.343	168.023	217.519		19.9271	23.758	24.7266	19.49	19.4382	20.8415	31.128	11.8154	31.2241	16.4397		153.35	137.403	138.42	139.918	155.296	135.896	208.63	22.2366	125.19	43.0581
205.257	219.875	173.377	274.836	231.294	221.897	140.67	191.661	149.517	186.739		296.069	231.277	179.486	234.093	184.577	237.603	137.813	221.9	169.533	228.958		20.8487	25.5857	26.3088	18.0133	14.7623	20.8415	38.9799	18.6562	32.7281	15.7999		161.075	132.619	135.106	153.321	154.039	122.827	198.222	35.0918	124.15	48.0598
201.911	214.215	175.654	271.788	233.863	230.546	130.366	192.342	155.854	191.049		289.377	238.039	189.308	247.912	180.898	226.3	130.94	222.141	170.021	242.702		22.2496	24.5932	25.9097	17.7401	16.3837	23.6225	37.2142	25.5991	38.5082	15.0167		170.69	135.767	137.007	170.496	154.48	125.172	201.891	58.1505	122.39	48.0004
194.207	204.826	179.792	273.517	228.605	231.498	125.867	183.024	153.683	184.515		280.188	241.4	195.437	226.958	185.436	225.248	127.568	220.594	172.416	253.007		22.5643	24.8896	23.0374	16.5075	13.8009	22.9585	35.7191	31.3022	38.8043	13.1288		174.468	135.173	133.135	171.034	156.878	123.908	213.963	63.7332	123.305	47.0695
202.457	186.942	179.792	273.318	231.905	231.098	122.068	181.17	151.658	181.929		276.868	240.743	199.333	238.305	173.534	220.1	127.203	225.621	184.866	250.38		22.5643	26.8886	22.9635	16.5647	14.0649	21.6338	32.7061	32.0224	42.7856	11.4931		182.183	126.671	120.688	175.058	167.492	123.527	185.003	65.4884	119.655	49.8449
193.06	185.736	182.848	279.525	230.643	233.751	122.118	177.385	145.355	183.3		271.845	249.185	200.939	245.72	184.331	257.932	134.577	211.606	197.869	254.809		22.4155	26.5027	24.6493	17.5612	16.1438	23.7261	36.0857	30.6957	40.0136	11.8909		186.072	119.519	118.225	188.396	167.158	125.838	149.955	78.6253	121.261	55.3398
181.966	192.77	189.398	283.286	228.347	237.215	122.821	176.384	143.886	181.967		267.131	244.202	205.121	256.742	183.117	253.801	133.513	204.792	194.486	235.439		20.4831	25.402	24.7914	18.0343	14.5986	23.2645	28.0024	35.7133	39.4084	14.1145		189.647	106.704	125.248	181.706	172.476	124.43	141.957	77.8049	115.167	53.4977
177.505	189.111	189.741	288.771	233.344	235.47	123.585	182.341	147.363	174.04		279.587	244.067	207.623	260.022	175.15	257.512	126.575	208.185	197.808	243.982		19.17	24.1061	23.0911	17.9822	17.171	21.3452	23.4363	38.8723	38.1875	16.7185		192.245	104.027	130.419	183.41	181.843	122.922	126.834	87.7604	112.126	58.382
177.551	191.241	196.255	295.895	234.965	232.792	120.353	182.464	145.967	164.966		283.132	246.815	210.463	262.124	164.304	257.335	127.975	213.003	197.03	258.159		20.141	22.8762	21.7157	17.1557	18.2729	21.7416	14.2652	38.3334	35.1011	16.9505		189.446	98.8109	137.617	179.339	185.322	127.125	129.741	88.0473	110.428	56.3496
180.547	212.105	198.443	303.772	244.201	226.215	125.184	187.749	154.983	164.162		288.195	246.272	217.326	269.68	155.304	257.235	122.035	215.035	191.21	259.525		18.589	22.8894	20.2545	16.4688	18.0132	22.0076	11.3001	37.9457	35.0331	18.354		194.57	94.9006	137.659	180.099	196.965	126.858	130.093	88.0527	110.239	60.8547
169.555	224.802	197.37	307.508	248.891	219.25	129.018	190.114	161.605	161.966		295.838	251.739	210.135	264.182	148.751	230.541	143.108	215.034	192.197	257.715		16.7851	19.4652	31.1496	17.6594	20.6264	21.5355	2.80576	34.909	33.6669	19.904		195.714	97.8681	148.487	175.869	193.945	131.431	145.273	87.6928	103.066	59.3769
180.259	241.162	196.382	311.949	246.463	210.948	132.948	194.613	166.697	152.947		297.384	247.142	202.361	257.112	152.199	228.97	152.658	217.498	182.777	248.255		16.5721	18.8167	39.061	18.2508	24.0717	20.9985	9.64398	36.2923	27.9595	21.1577		190.48	87.3751	157.803	162.054	195.661	135.947	156.064	71.5373	101.818	65.9491
188.568	249.899	200.515	314.234	252.551	210.158	125.026	201.944	169.76	150.329		308.044	248.753	197.644	273.925	159.12	222.359	163.407	219.432	166.168	239.4		15.5876	17.7129	39.1498	17.8847	27.5735	23.1696	14.5433	43.3544	30.8803	22.4738		193.345	85.1566	171.072	166.326	200.193	136.219	145.943	78.8398	103.054	67.8687
182.711	266.81	205	319.714	248.348	218.832	126.194	196.945	177.363	149.626		312.158	254.905	191.561	269.92	164.935	214.245	177.176	212.223	157.574	248.797		15.939	17.5106	38.1372	17.721	25.9462	24.0349	15.829	43.753	27.8126	21.0021		183.365	85.6999	182.201	161.736	189.868	150.151	159.313	88.3265	111.98	63.6807
185.55	265.782	203.502	315.263	255.266	207.728	129.012	201.791	201.087	144.429		309.768	257.835	186.886	268.01	154.617	180.827	176.737	202.663	151.942	240.356		14.9818	17.5648	36.3795	18.5363	23.6333	22.1623	28.5666	51.2019	20.6356	19.3473		182.224	84.6818	192.448	157.788	190.947	144.066	150.601	87.1502	108.203	61.5025
186.496	263.224	203.59	320.205	259.06	203.79	130.445	199.87	216.113	146.94		311.804	266.664	176.129	257.099	154.366	175.451	183.13	200.902	151.465	250.13		18.1247	18.5719	37.6493	20.1207	24.0765	22.5156	29.4122	50.055	13.2777	17.4275		176.144	90.3242	195.335	159.032	184.153	140.831	149.856	102.988	110.663	62.723
179.39	269.277	207.307	322.77	254.922	203.535	132.072	199.092	230.081	153.588		300.049	268.514	154.114	254.61	157.756	147.437	188.227	191.884	146.866	242.201		21.1053	20.2771	36.6337	21.7713	21.6783	23.002	33.8689	47.58	9.42151	16.9153		166.151	89.8637	198.982	155.738	182.788	137.683	146.647	104.361	107.427	60.3629
186.438	272.985	202.203	323.969	256.964	203.621	139.995	202.852	244.23	153.882		300.505	259.644	146.596	254.784	155.148	132.642	186.76	187.12	144.912	238.712		23.2213	21.8404	37.5139	23.9836	21.4224	22.5918	35.4437	53.3357	5.84234	15.4245		170.84	96.8735	200.916	152.711	184.331	119.206	130.918	112.494	102.603	57.8697
177.713	255.852	201.027	317.734	253.877	212.184	141.25	201.76	252.728	154.703		290.779	245.847	123.23	253.568	148.522	124.378	179.096	185.077	141.825	239.406		24.9836	22.5454	38.2377	24.8061	20.9959	21.7428	37.6372	56.822	2.00573	14.2922		164.942	94.1538	206.436	154.628	174.996	126.445	122.669	127.707	100.283	54.5989
198.7	247.534	196.806	320.747	253.488	217.492	145.251	207.997	265.761	150.541		277.177	230.832	107.323	265.103	145.428	130.496	162.609	188.625	136.024	233.588		25.7782	24.2082	26.3492	24.7162	18.2948	22.2149	32.964	58.1567	10.5166	12.9996		162.705	88.2519	203.692	149.932	175.145	129.85	121.83	133.79	99.6942	49.7941
197.096	239.51	192.547	324.255	256.088	221.668	149.408	206.942	266.122	155.178		276.412	224.41	95.7401	266.767	140.246	162.194	161.836	186.908	136.596	223.187		24.8605	24.04	20.071	25.6627	14.9562	22.4423	36.4859	58.1567	17.0188	12.6792		163.853	98.9378	202.577	152.246	172.898	113.513	155.659	141.827	105.939	43.8391
200.586	237.443	191.007	327.642	247.516	218.764	160.994	210.436	270.068	161.644		278.745	233.163	86.6134	271.985	126.07	160.088	156.08	179.387	143.884	236.716		25.705	23.9399	19.8711	27.583	10.8928	20.8386	42.2443	49.6424	26.4748	10.2417		156.211	100.258	201.817	149.679	158.314	119.83	162.264	142.098	110.965	38.8769
207.827	243.023	189.178	300.133	252.097	209.18	157.756	233.4	267.219	162.829		286.112	233.216	81.0797	255.37	114.717	168.576	148.736	177.609	156.087	226.432		24.4958	22.4549	22.3108	27.2545	12.2413	21.0588	45.6025	55.806	33.5709	10.1419		158.719	103.363	195.648	153.102	157.548	99.8974	145.34	135.131	105.244	45.1341
208.263	243.558	189.611	315.434	246.212	221.997	151.127	235.151	256.718	170.632		299.268	222.46	72.5267	248.836	110.959	170.288	140.673	181.584	155.391	227.082		26.8361	23.1442	21.0966	25.2421	13.7344	23.1216	45.6025	49.6475	32.8683	11.6165		157.692	102.706	191.423	156.852	147.349	103.774	128.153	128.517	114.013	45.521
209.582	235.868	185.165	308.654	245.09	223.579	143.139	244.375	258.894	165.356		298.814	213.533	78.2208	245.47	108.951	161.489	127.011	186.382	147.815	225.425		25.6663	24.0597	20.6885	25.0756	11.2607	23.9372	45.6025	47.6147	32.8667	12.443		165.869	93.8611	192.725	168.168	151.89	101.953	79.1897	115.886	118.903	47.9356
217.281	245.567	185.713	285.09	259.422	229.326	142.003	249.963	261.4	162.695		303.473	215.806	84.3612	242.923	106.156	157.344	132.425	189.257	142.694	223.794		23.1068	23.2327	20.3997	25.06	15.7347	23.945	42.1673	49.1735	36.8745	10.5783		179.23	98.4767	186.861	180.395	145.601	100.765	39.3144	115.531	123.137	49.2801
210.391	250.402	188.14	253.33	259.836	227.922	135.998	249.08	258.506	164.866		302.549	211.817	83.1746	240.771	116.588	155.061	133.279	184.353	146.334	230.526		23.2341	21.6751	19.9361	21.9251	15.637	26.5985	45.149	45.0608	38.8679	12.172		175.944	87.3197	182.891	181.018	139.738	111.257	0.00172009	104.897	136.012	51.3888
218.594	270.059	189.052	221.863	263.126	226.626	132.567	258.571	259.856	157.383		307.107	217.034	95.2457	243.057	126.234	148.158	133.492	182.74	152.696	211.394		19.4024	21.1284	19.9032	22.4756	16.9059	26.4505	45.149	41.5745	41.2155	15.0311		184.217	82.6232	181.097	183.329	144.489	107.981	39.7481	88.9452	139.539	55.9534
203.644	283.937	194.34	183.921	262.784	226.504	131.746	257.182	249.71	151.228		311.812	217.032	103.638	238.419	125.79	137.734	144.133	177.741	158.258	207.642		22.5561	20.8336	20.1306	21.3296	19.8556	26.3274	44.168	42.4344	41.634	16.9443		184.985	75.5531	187.546	190.056	152.866	107.453	70.7461	83.5148	144.463	62.9247
202.842	283.315	202.84	150.534	267.842	230.257	133.948	263.67	260.551	141.487		304.017	206.098	117.194	240.473	130.795	112.727	143.552	174.818	158.227	198.281		23.4749	21.5572	19.5041	20.7747	18.9287	24.9373	45.2335	40.5594	42.8362	18.7284		190.638	60.5364	182.274	193.612	158.661	118.009	152.888	96.0363	141.898	68.0685
195.157	294.964	194.895	115.826	278.11	242.182	132.402	267.076	269.248	128.07		300.069	195.901	121.781	244.269	134.715	109.178	147.571	179.62	155.962	217.476		22.7097	21.118	17.7682	18.5013	22.0716	24.1082	41.0982	42.4906	38.4738	21.0882		203.361	49.338	185.353	198.551	164.435	104.248	188.949	91.0024	135.884	72.6891
194.415	288.803	193.284	108.519	282.233	251.989	137.704	258.308	279.205	123.189		295.086	191.783	130.545	260.065	145.457	101.824	152.073	176.306	144.331	212.558		26.1545	21.3317	14.726	17.5077	21.5428	25.1878	40.5392	35.8004	38.5299	21.0786		205.145	39.1412	190.629	198.67	162.663	107.683	195.81	87.0247	140.798	71.2889
199.189	290.422	194.161	65.7195	294.896	253.259	141.061	260.819	280.813	108.413		288.348	196.693	146.848	308.036	144.504	98.7259	170.247	175.322	139.653	209.043		26.3269	20.7431	15.8565	19.5747	21.7091	24.3044	40.5392	35.8004	37.8425	21.0552		210.432	43.9248	194.758	199.063	174.097	111.999	192.318	82.1395	134.222	72.34
198.123	293.233	202.06	42.7585	302.508	261.573	146.777	261.128	270.98	94.5604		286.046	199.695	146.407	313.35	146.963	103.167	181.413	172.777	142.444	204.647		27.4886	19.4619	11.6257	20.3397	22.851	23.3417	43.563	37.3646	37.693	21.1071		205.362	51.0831	195.286	191.027	174.079	110.509	166.388	77.1749	129.507	76.7559
195.6	284.776	205.209	32.2881	301.684	265.963	147.04	259.555	261.204	80.527		284.945	189.849	156.041	328.29	147.245	92.7883	182.221	174.903	136.326	197.406		25.866	20.1434	8.52931	20.3453	18.3221	26.3681	43.563	34.0816	34.9903	22.5174		206.071	40.6152	199.041	178.065	167.797	102.954	158.636	69.9716	130.89	76.9851
204.148	282.422	208.259	33.4448	307.973	271.543	145.6	264.14	256.932	71.4415		289.383	193.234	165.22	328.519	140.491	92.455	182.557	172.706	133.961	181.98		22.578	20.5069	6.43435	21.7108	19.4303	24.1248	43.5802	33.6623	37.8064	20.2655		209.201	42.1553	196.654	179.083	174.071	98.0956	141.086	90.3215	122.824	81.2314
199.445	254.449	215.304	36.6094	308.679	279.623	148.43	257.304	252.836	74.3853		300.778	188.872	163.543	317.482	144.35	94.1288	190.11	163.192	136.198	189.405		25.6905	21.7545	1.1248	19.3254	18.6978	25.7098	44.0992	33.6089	35.6565	18.8391		206.112	38.2243	199.518	170.976	171.04	94.9373	138.396	104.329	117.573	81.0809
200.757	245.155	219.743	40.2765	309.647	283.272	139.464	257.771	256.572	77.0882		309.874	184.242	163.25	306.274	143.054	92.1321	185.659	162.173	129.337	180.022		22.4142	21.531	5.11514	18.6486	16.5157	27.0682	44.3629	36.9913	32.9785	18.328		209.313	49.0019	201.886	162.732	157.216	89.3615	137.049	123.032	117.442	81.6401
193.638	245.475	216.114	44.4434	306.809	281.336	145.63	256.159	251.072	79.392		324.229	188.052	180.053	301.996	136.487	89.7658	186.083	158.528	127.859	185.553		22.8507	22.044	11.755	18.8732	21.4849	26.9628	41.3763	36.1304	31.1136	17.9647		205.596	61.1976	208.57	162.042	148.673	95.6866	140.602	120.408	117.027	82.1375
186.338	227.211	230.625	43.8091	307.343	278.596	155.028	251.864	248.847	89.4557		320.121	185.848	179.192	281.589	137.583	80.6598	180.177	157.3	127.233	163.789		23.3994	22.5724	16.837	21.4232	18.3552	27.6083	40.0103	34.6913	36.8157	18.7659		196.814	67.0816	205.408	151.086	140.263	102.544	144.889	128.432	116.847	84.357
212.398	237.55	237.497	52.2094	307.982	273.092	154.287	260.82	248.581	90.2616		319.581	189.527	179.834	266.436	134.145	73.8668	176.749	165.566	127.656	171.863		21.1113	21.6937	20.4241	20.9636	11.6565	26.6365	40.7111	40.1978	40.8116	19.2299		201.441	76.0222	202.317	155.989	134.117	111.01	153.492	134.11	108.187	87.3188
210.287	238.516	243.671	53.2442	301.868	268.738	161.205	265.313	247.909	95.5867		315.46	177.145	177.833	222.147	148.988	66.9417	164.982	172.705	134.627	170.137		19.7129	21.6651	25.8536	18.2287	4.56614	24.5897	44.0153	40.889	43.8763	20.0455		198.584	72.3425	199.494	146.797	124.803	105.647	161.791	137.75	108.502	91.6818
220.044	242.485	247.731	60.0999	304.2	252.807	167.235	270.12	253.529	109.534		316.263	168.205	183.984	219.369	154.644	61.9219	160.801	176.191	137.856	180.914		19.2165	22.0308	26.5112	16.5732	1.23947	24.8442	40.9914	41.9437	47.3859	19.0049		198.208	71.9832	195.79	154.072	129.906	113.792	164.031	136.566	113.417	91.6342
220.435	236.176	249.833	72.7957	300.865	240.97	164.997	281.697	253.37	116.574		315.68	166.119	181.69	208.361	152.585	69.4264	155.767	173.293	144.061	180.605		21.5928	21.3493	27.3758	15.0587	8.11536	22.1464	40.2396	45.3945	50.9383	17.7528		195.779	79.7244	190.548	165.592	143.152	126.98	155.714	141.119	111.897	94.9487
215.477	243.676	251.58	86.9315	294.205	237.165	170.258	280.761	255.292	128.454		306.586	154.403	176.826	218.545	158.866	68.9556	155.53	173.676	148.694	185.046		21.6559	22.8055	29.8117	15.4672	12.3271	19.9907	34.9048	42.2147	46.7717	20.3824		195.983	81.9015	185.214	176.83	128.901	135.011	160.799	119.58	114.876	93.9228
222.894	280.292	252.21	101.807	297.835	224.37	168.97	284.488	253.227	131.701		298.975	145.893	183.915	232.473	149.188	64.4964	149.955	187.416	145.086	187.393		19.478	21.055	27.6154	15.7525	16.0312	19.698	38.1421	44.965	40.0858	19.8706		202.181	90.634	175.761	185.814	124.842	147.6	169.036	114.841	119.951	97.2572
225.87	281.352	248.969	110.618	296.354	226.408	182.511	286.855	251.599	140.229		291.254	141.727	205.253	263.914	160.471	62.464	147.693	192.422	162.89	198.983		19.9129	22.8783	27.375	16.5764	23.0946	18.5848	37.8784	32.3424	34.3648	19.4854		203.733	93.9447	163.24	192.995	126.632	152.79	186.656	100.139	120.579	94.8568
237.556	284.385	250.464	117.251	297.819	224.598	175.497	286.45	252.447	147.684		278.801	132.747	196.813	293.178	155.9	56.5573	145.671	193.314	181.362	209.995		17.8642	24.1641	25.3514	17.3497	30.2645	18.9736	36.9203	22.9255	28.3207	18.3237		206.389	98.1743	152.965	192.343	132.412	149.422	194.213	80.8735	127.017	96.5182
253.371	296.883	242.534	131.995	296.941	222.75	162.212	297.096	251.738	146.292		278.478	134.026	214.56	304.956	149.833	60.1262	157.257	195.526	190.552	192.918		16.6708	23.8431	23.0784	17.8465	33.6223	20.0666	42.0482	17.4374	18.3227	15.088		215.068	107.051	144.814	208.149	138.456	157.668	187.879	78.966	114.347	93.8283
229.977	284.2	237.277	143.532	292.813	218.432	160.847	288.685	247.491	155.888		279.1	129.035	218.786	310.377	152.141	58.516	151.428	197.908	199.808	194.288		15.2957	24.2086	23.4136	18.9614	29.7613	20.8733	46.0214	6.08999	10.6002	17.7201		217.622	109.114	139.519	203.057	143.951	160.654	210.411	75.704	125.216	99.5915
237.015	278.353	232.127	154.433	295.169	212.496	159.338	290.162	238.92	161.583		291.478	133.246	217.996	315.134	140.623	64.0046	149.775	198.193	200.67	213.888		13.8011	25.8629	23.1836	19.2061	29.2122	21.1765	45.4231	2.6302	1.15636	16.1054		219.445	114.96	144.057	211.114	147.367	165.928	210.226	77.3302	127.598	99.1643
230.805	276.907	225.751	160.606	291.845	218.484	161.662	281.112	225.174	165.335		295.106	140.97	218.598	317.527	136.194	66.4455	161.212	198.362	209.401	216.351		11.0699	27.135	24.9226	19.7465	29.7063	20.5946	45.3247	11.032	12.2189	16.6021		223.62	119.653	146.959	204.146	136.127	178.023	232.639	79.9472	128.884	100.144
235.951	280.873	217.718	164.452	291.31	215.919	175.049	274.02	214.743	171.353		298.695	146.675	221.213	311.833	127.217	64.4774	164.698	204.14	212.524	234.29		9.48242	27.135	23.4569	22.9954	22.2702	22.7267	46.0765	21.0006	21.5544	17.0393		222.403	126.979	153.175	193.511	125.356	180.051	234.278	83.3884	128.798	101.218
234.274	269.165	209.793	161.294	295.122	208.864	175.219	278.156	195.333	169.487		317.045	159.522	225.094	300.773	121.111	66.093	167.043	208.597	211.449	238.163		10.0165	25.6788	21.9035	25.4349	23.7269	24.2017	52.3204	30.2251	25.6896	15.956		221.336	137.67	156.099	184.609	133.458	186.449	252.905	88.6849	123.002	94.9919
229.375	240.43	200.424	162.526	288.619	209.747	174.516	272.677	178.964	174.325		313.411	163.43	228.223	291.531	124.65	70.083	174.501	202.705	216.544	238.925		11.7213	25.6788	21.6599	26.0306	25.2895	26.1973	49.5224	41.7818	28.1895	16.6814		217.251	142.393	155.006	174.622	127.554	178.6	223.788	94.4444	122.649	92.3851
232.867	230.21	198.526	174.051	295.257	200.548	168.713	277.17	166.074	176.418		319.457	164.949	219.288	242.849	117.946	88.8972	182.83	204.335	210.292	235.828		13.2214	23.9077	21.2986	26.009	23.235	26.8361	49.5224	46.3667	26.9145	17.6219		217.335	142.189	159.736	165.728	125.057	189.171	175.16	96.6042	120.534	90.8085
231.363	229.083	196.006	183.917	293.915	192.312	173.335	280.223	156.881	179.077		323.112	174.74	222.026	224.547	121.089	108.566	196.897	203.924	201.776	221.961		15.3437	23.6517	22.7165	24.9662	26.1011	27.9176	55.221	39.7768	28.1215	16.4489		217.564	138.767	167.57	160.886	115.188	184.063	125.375	131.84	114.679	90.1296
231.542	228.095	201.562	186.784	287.954	182.433	179.729	276.997	147.448	185.634		323.829	168.965	220.877	206.284	125.351	116.467	192.222	207.453	197.863	217.871		15.6074	22.6569	22.7398	22.8177	25.2855	27.9006	50.0031	37.856	27.9972	15.8468		212.766	136.648	180.417	144.724	112.811	183.313	99.4053	132.397	129.553	91.0589
226.99	224.433	202.846	184.444	291.635	179.252	178.499	285.987	142.119	183.461		331.067	180.846	217.758	211.919	123.478	134.886	204.431	207.719	189.386	219.868		15.6651	22.9142	21.5393	24.5981	27.7813	27.6087	45.4244	39.0516	27.587	15.086		205.348	142.773	189.386	140.457	109.665	174.199	44.825	132.256	123.474	83.8983
221.013	221.163	201.659	187.355	286.235	177.787	174.382	285.822	146.426	193.068		316.93	192.115	226.928	195.493	123.627	145.308	209.509	201.832	184.362	184.476		17.9433	22.2567	20.3206	24.7344	28.2812	27.3142	40.8259	40.4205	28.0482	17.1285		198.818	145.147	185.933	135.516	104.976	179.838	13.1001	127.55	124.372	84.0537
220.369	227.891	204.205	190.636	288.312	174.321	167.633	297.325	152.548	193.223		321.6	207.136	245.775	191.303	118.089	174.902	204.071	200.383	177.974	193.707		19.8747	21.3201	24.8901	22.8632	27.2761	28.5491	40.0333	41.6474	27.9897	16.1755		189.863	151.373	185.355	126.773	103.537	162.774	39.6805	120.94	116.497	79.4622
225.472	244.504	209.65	190.965	286.751	181.122	166.913	298.221	147.162	193.869		316.235	212.866	256.748	193.82	121.497	189.355	212.578	191.627	179.279	194.201		20.6049	21.6857	27.3651	21.3008	35.3048	27.7707	40.0333	39.5351	29.6428	16.206		183.57	150.536	183.301	132.109	105.399	171.825	84.9987	115.401	115.11	78.6068
254.648	261.16	215.979	193.589	282.422	186.265	177.061	290.359	158.142	197.377		300.067	196.463	264.535	199.953	122.065	200.526	210.876	189.901	178.742	185.239		20.0884	20.1992	29.6461	21.2921	36.2216	27.3144	38.788	34.1459	31.288	14.8201		180.493	154.397	188.97	128.913	103.586	164.074	128.646	122.737	118.063	86.8505
282.902	262.029	225.335	195	286.405	186.517	190.057	293.157	168.654	194.581		304.678	181.659	269.555	202.174	116.507	204.634	205.098	186.317	176.31	192.707		18.9626	20.5202	30.8926	20.9162	39.9647	24.7798	38.2669	32.4315	29.5875	13.1563		174.717	173.431	198.002	129.369	103.427	159.93	155.228	115.784	113.199	87.0362
290.613	267.276	230.256	193.12	275.959	184.337	198.581	285.024	176.745	197.801		305.271	170.678	272.178	248.568	113.744	194.127	195.604	170.231	174.614	203.714		19.7475	21.8014	31.2219	21.3616	38.9395	23.8775	37.4856	28.8064	30.9736	13.8676		164.221	192.723	198.031	132.968	106.884	150.465	152.389	123.737	112.567	90.43
300.642	269.825	230.954	196.012	274.664	183.26	197.068	285.047	181.465	202.794		310.309	161.538	276.829	256.087	108.921	185.887	188.565	164.2	171.349	211.665		20.818	21.9603	30.1754	21.2823	37.8162	22.7879	30.4152	29.2795	30.8626	14.7128		159.488	211.645	197.811	134.05	111.901	151.23	157.561	105.761	110.05	89.6205
307.007	266.935	223.638	194.6	274.785	187.873	195.123	281.302	184.045	205.641		316.596	162.54	281.204	279.371	104.089	223.004	183.549	150.666	174.072	224.153		23.8407	23.8692	30.6311	22.4228	39.293	24.6027	31.2526	33.1575	31.0721	14.6802		152.324	220.076	183.509	151.496	113.348	147.178	157.862	108.774	103.426	90.9546
314.598	256.055	227.631	197.151	267.445	194.236	200.209	268.915	184.696	210.783		313.703	139.974	297.663	282.819	98.5642	210.864	175.706	142.12	177.508	225.646		23.2102	22.4583	31.7191	21.6311	37.5454	24.7564	35.495	32.5246	34.5862	12.3513		148.794	224.706	177.445	158.764	119.09	156.465	158.198	111.304	105.815	94.9811
320.617	259.041	230.474	200.266	271.184	197.122	205.508	260.558	181.23	206.304		326.725	114.569	298.225	295.706	92.6373	197.695	169.55	135.441	188.197	229.517		22.4041	21.8269	30.063	23.5037	34.3349	24.3915	37.3877	30.674	33.6377	9.39168		151.03	241.938	180.951	164.618	122.647	145.306	146.345	122.03	98.1981	89.6661
322.113	248.657	231.039	201.164	264.5	204.281	204.52	248.845	179.415	206.891		321.515	82.9751	277.345	291.423	88.0103	178.348	166.581	123.491	199.344	206.037		23.43	21.4914	23.7132	23.2064	34.5787	25.7189	39.1749	22.0741	34.2043	12.5758		153.458	249.302	181.018	177.563	125.498	163.795	146.133	125.642	100.63	93.325
324.098	227.399	229.259	207.083	266.399	198.659	189.141	243.304	191.306	202.449		323.439	62.7774	263.102	296.376	86.3776	180.087	157.098	120.666	201.415	200.571		23.4865	19.5325	16.6316	21.0378	25.7135	24.779	38.8681	15.3139	34.8959	12.5597		161.393	260.041	181.915	176.485	121.898	145.511	132.68	129.785	106.692	91.9187
300.58	205.359	232.499	209.502	264.313	195.952	164.203	245.911	190.372	197.242		324.925	65.8466	261.189	289.398	83.6449	158.124	153.202	110.133	202.932	229.491		24.7338	15.9621	8.17137	18.444	26.5145	25.7449	34.3892	12.2232	35.1264	13.3762		161.643	255.07	182.892	178.793	125.253	153.557	161.956	124.844	98.5003	89.7468
282.9	197.458	228.176	211.878	262.459	191.877	151.532	242.856	190.267	196.22		315.451	74.5463	253.6	284.719	84.5707	161.448	150.764	98.0457	207.217	231.121		24.0874	12.21	4.15703	18.6682	20.1625	27.795	36.4753	4.27504	30.8818	15.7216		162.757	240.699	183.108	180.883	125.66	158.825	174.375	125.149	93.038	92.6491
278.6	189.035	222.14	212.326	266.131	196.498	143.306	244.282	187.074	185.864		308.317	80.8048	255.142	256.651	75.1437	147.081	154.653	94.4932	200.342	225.401		21.3895	6.6503	1.47083	16.9267	20.8384	27.362	36.4185	4.34289	24.6409	16.5069		161.884	232.17	181.343	179.864	129.447	150.36	186.711	117.282	93.9345	91.979
272.27	183.673	227.649	208.735	263.506	211.269	128.689	240.735	176.612	178.548		303.155	83.2064	251.846	233.505	74.2915	144.71	145.124	86.0187	204.222	219.49		19.8831	0.868671	4.69334	16.0624	21.6962	26.5407	39.0289	10.3789	16.7207	17.5862		164.065	216.19	184.854	179.428	132.915	154.295	180.165	109.554	103.318	90.6014
280.685	186.686	240.68	204.186	259.131	210.038	155.076	244.058	177.192	172.731		296.293	84.5833	240.264	217.142	69.2756	99.2055	152.829	82.2983	218.201	216.443		19.7883	5.7438	11.0891	15.4762	19.1267	23.8024	42.1781	18.6468	7.60167	20.487		172.157	214.199	193.939	166.74	133.579	158.864	181.551	103.532	103.733	92.5015
280.166	196.408	237.125	204.733	251.15	207.739	157.966	255.439	175.393	162.716		292.762	91.5709	236.038	201.942	81.1434	104.172	155.451	71.015	237.367	202.891		21.0266	7.71273	16.1349	15.8047	21.067	22.0654	36.0646	23.3266	1.73219	20.4972		175.287	211.507	198.731	163.852	130.259	155.856	177.101	116.362	90.9532	90.6401
281.225	193.777	234.505	201.459	244.797	211.156	147.787	260.834	170.448	161.811		277.952	99.6392	235.23	196.511	85.9235	105.945	176.974	61.9647	238.517	202.423		20.8742	13.994	18.6494	16.3098	21.1461	23.2145	36.0646	34.7308	8.60666	22.608		169.043	200.438	198.648	158.156	124.877	166.164	204.936	121.727	101.546	95.5105
287.125	193.511	232.927	193.029	237.111	212.953	141.997	268.795	170.673	163.197		280.154	115.098	245.41	210.957	87.7618	96.0803	182.943	59.5386	234.862	188.659		21.9852	18.2056	22.6965	17.2357	23.219	21.5952	39.5883	34.1614	14.5786	19.7561		165.832	192.533	196.352	155.377	125.762	152.416	208.207	131.906	100.085	95.1878
277.616	195.558	232.531	184.602	219.882	219.891	131.019	269.744	169.639	165.291		279.975	128.887	256.503	203.348	95.1109	87.824	184.949	56.835	238.519	182.707		23.8606	21.141	22.796	18.8594	25.2978	21.2654	39.895	33.5235	26.9437	18.8913		156.403	179.027	195.621	152.173	134.189	160.397	195.186	126.446	89.0402	95.8121
284.019	199.763	229.696	185.328	204.122	222.767	128.179	244.263	174.165	170.778		287.56	136.203	255.796	214.875	89.4499	97.6285	187.92	59.5914	236.528	154.872		23.0339	21.1819	21.4309	20.0621	23.5969	20.5717	39.6108	37.7679	33.7042	19.5954		152.557	183.752	189.437	149.575	135.99	156.15	165.134	127.938	99.2435	96.1867
278.814	214.28	229.47	180.719	183.719	229.398	113.878	225.056	184.679	167.384		298.828	155.909	258.39	224.021	92.7548	96.0851	191.575	66.2067	236.869	165.866		21.8016	20.6329	23.3172	20.9587	23.9238	19.3534	37.0875	35.4466	36.3057	17.0994		146.325	181.355	185.205	152.401	144.942	162.657	148.207	136.906	106.538	96.1369
277.234	222.571	235.775	176.694	170.896	222.954	120.777	206.459	193.33	172.009		303.549	165.449	259.259	235.397	101.977	109.153	191.905	67.3937	242.956	160.717		22.104	22.796	25.6834	22.6087	22.0105	20.2775	41.4183	38.7981	35.8213	15.6228		145.845	172.372	182.941	147.565	141.146	176.783	145.053	136.486	108.632	94.3001
279.07	226.79	227.889	173.778	160.414	208.254	127.456	183.784	205.178	169.885		311.522	173.801	262.526	242.114	99.9211	112.389	199.888	77.057	243.531	182.533		21.6183	20.991	23.7359	24.6346	19.2648	21.2101	39.4218	39.7047	38.2139	14.5221		136.282	171.332	176.502	147.633	137.668	182.258	157.049	143.762	101.614	96.1123
259.359	225.703	218.802	178.544	152.485	210.834	92.2435	161.656	211.212	168.619		317.384	177.774	286.382	270.707	102.156	129.084	191.243	81.3254	232.136	186.396		18.7588	22.2397	22.6213	24.6984	24.0752	22.6763	36.1403	41.6955	34.7711	13.3707		123.918	165.646	170.601	145.99	134.427	184.443	164.986	152.971	104.128	92.0718
255.596	224.285	215.577	185.099	152.098	211.066	77.8167	135.691	218.348	173.11		317.922	183.704	285.048	292.168	87.28	143.755	190.41	89.983	216.679	185.96		18.9831	22.1406	23.3568	24.1641	14.349	24.0614	37.2179	41.687	31.3475	12.444		114.92	163.584	164.779	149.457	130.717	175.954	166.911	142.759	113.679	88.6396
258.305	229.636	211.209	190.136	144.954	203.076	92.5763	122.22	226.43	173.765		327.502	200.55	288.632	302.041	78.8362	150.001	171.738	103.309	217.521	218.055		18.1368	21.7281	23.2496	22.9602	9.38859	24.4621	36.7242	39.633	33.5033	11.9203		114.92	156.715	154.301	159.556	134.361	170.647	150.152	134.41	106.085	82.1169
251.559	229.911	200.191	193.61	145.168	191.277	113.457	105.729	228.045	173.956		320.338	208.167	278.005	301.026	84.1387	157.099	158.031	110.821	221.283	233.686		14.4559	23.9626	24.1116	23.6063	5.63054	24.3694	30.2483	43.6337	37.7243	11.3486		115.977	153.78	147.19	157.714	127.306	169.571	143.693	130.817	107.839	77.4792
256.66	235.105	191.247	196.293	146.151	178.245	133.72	90.315	231.755	178.721		319.657	210.891	274.246	308.084	80.7278	157.727	151.232	119.984	225.615	238.272		11.8101	26.0552	24.3892	23.1024	2.21359	24.9162	27.9597	36.8269	34.3481	12.746		120.091	154.77	135.808	160.233	114.871	171.299	154.409	138.927	111.524	75.2542
246.478	236.521	178.977	195.915	154.509	171.013	159.657	102.834	237.26	178.639		309.781	214.337	267.73	297.698	83.9704	158.342	150.106	123.781	233.698	238.772		10.5349	27.1477	25.0109	22.4196	6.08921	25.4643	27.7831	24.0102	39.3758	13.2396		119.221	150.283	137.253	160.588	99.1946	169.411	160.691	152.537	106.222	68.5137
244.264	221.827	168.811	198.614	162.612	165.103	173.698	108.17	235.762	184.402		304.113	198.457	273.793	293.381	69.5339	154.148	152.013	133.839	235.342	215.532		10.4251	29.6423	24.1438	22.8717	9.30092	25.7495	33.6606	19.0706	36.7955	13.6012		122.942	146.98	138.155	157.178	82.2944	151.22	176.712	151.485	109.995	61.9029
242.516	215.281	155.184	203.925	166	161.846	158.319	112.949	232.814	184.218		300.761	194.48	277.981	286.568	63.5416	157.217	147.35	149.8	236.485	221.001		10.0664	27.5442	23.588	22.703	13.8442	25.6739	30.1679	3.66584	38.1519	12.7483		123.352	149.965	134.636	160.444	79.7241	140.046	166.464	159.308	110.943	56.0749
237.438	203.613	149.524	205.79	165.786	163.209	152.204	124.607	228.438	189.92		286.893	191.818	280.015	283.088	69.72	144.407	143.17	158.177	233.481	223.829		11.1252	28.3322	25.0745	20.8151	16.6726	27.5846	28.7146	6.70489	34.7135	15.3092		121.091	152.213	125.397	162.244	77.5048	135.36	152.012	157.201	109.866	50.4378
239.639	201.066	147.002	208.956	168.298	151.02	152.956	121.686	221.082	193.683		279.094	185.255	268.659	256.035	64.0339	133.306	145.057	173.473	231.576	224.636		13.6474	28.9013	26.4188	20.6901	22.4312	26.6131	34.6665	12.666	37.3229	14.4857		134.736	152.752	124.417	166.024	68.7258	126.647	133.452	158.278	111.172	43.1686
232.541	206.299	135.648	199.892	169.628	132.472	148.979	119.644	214.554	196.107		282.831	180.115	263.17	237.388	79.8996	121.71	140.322	180.26	230.923	237.373		13.3061	30.1493	26.074	20.36	22.5404	27.2682	41.3576	16.3923	38.6566	17.5657		142.664	146.285	122.466	159.137	73.5333	132.612	128.885	160.516	113.736	43.7712
224.319	197.876	134	194.601	169.925	126.623	127.42	114.62	210.745	191.147		283.188	171.433	262.887	234.312	75.4133	111.745	132.657	178.259	222.501	217.439		13.9855	25.1518	26.4097	20.2931	21.0065	25.922	41.7306	30.9867	40.3205	18.5553		142.262	141.311	128.001	145.251	72.2497	121.601	133.806	156.084	117.989	41.7222
225.135	195.182	131.586	192.193	171.576	122.936	99.9393	109.481	215.008	184.934		293.063	161.067	281.651	223.489	85.4085	126.953	142.238	178.47	215.137	206.076		14.3904	18.8756	25.7514	19.6226	22.0253	25.7175	42.8514	41.3659	41.2368	18.9926		140.482	132.192	125.478	137.958	78.6613	119.469	134.368	154.357	114.336	42.7318
218.658	189.92	134.527	186.596	176.657	118.231	83.5099	116.058	206.939	178.705		301.858	158.275	280.542	225.917	90.255	122.86	140.447	185.071	203.44	195.948		16.0492	11.8854	23.6659	18.3977	24.7451	25.4352	44.4033	39.3598	43.2337	19.8604		135.409	139.798	132.257	134.179	88.714	114.209	135.225	156.218	114.351	42.4267
217.312	190.116	136.278	177.513	177.026	111.226	61.1821	111.788	204.409	172.882		314.96	157.941	287.41	230.223	95.3403	121.754	143.276	204.68	193.315	194.777		17.0455	4.9789	22.6382	17.3203	21.3045	28.0025	44.5799	32.7905	37.6595	18.4583		138.436	138.032	129.615	126.72	99.962	111.731	128.937	141.331	117.198	44.4826
208.362	186.693	136.813	171.541	171.992	101.736	49.9729	111.398	207.864	162.634		317.972	162.264	290.022	211.393	112.816	111.989	142.473	222.686	192.453	188.005		17.7044	2.03905	23.2436	16.1167	27.7816	25.6502	44.1174	36.3011	43.2195	18.9699		132.199	139.466	123.738	122.648	110.48	119.896	104.992	141.309	111.95	46.9553
200.464	185.058	133.742	168.812	167.543	108.127	48.8975	111.898	215.595	160.325		317.441	166.314	298.794	214.071	126.106	103.752	139.224	241.148	191.645	188.547		20.0009	5.74866	22.8469	16.6654	25.2053	28.026	42.9613	30.448	44.2277	20.4333		131.723	132.771	121.924	120.561	98.8169	130.228	106.445	130.884	111.003	51.1898
196.502	189.475	129.448	164.329	171.203	113.813	55.0251	106.249	223.057	161.168		323.987	167.803	306.29	229.655	129.879	123.044	142.549	258.761	186.481	168.339		22.6163	9.98697	20.7643	17.6538	27.918	25.7383	43.8306	29.0436	44.364	19.9518		138.111	130.577	123.075	111.326	96.8367	127.728	111.408	121.521	108.537	62.2746
196.083	179.888	121.933	157.65	169.42	125.951	68.1802	112.29	233.196	163.048		322.461	171.516	299.191	211.369	145.737	117.413	150.989	271.205	189.059	163.427		21.5335	15.8332	18.8554	17.6739	28.7569	28.1156	37.921	39.1574	43.7648	20.8395		132.445	124.995	116.31	111.742	109.994	132.759	149.124	114.669	113.418	71.1189
194.537	167.823	124.541	153.73	157.334	138.986	78.6466	120.601	245.816	161.912		318.682	177.154	298.027	213.889	134.239	111.323	158.78	284.582	186.731	179.845		20.947	20.2247	19.0012	17.1061	23.9907	29.0791	31.3802	41.7956	42.6829	18.8092		129.261	125.301	109.134	115.691	110.348	131.23	188.739	122.46	109.861	69.8527
189.947	171.072	119.876	155.299	148.546	135.383	93.304	126.883	249.97	159.235		312.166	189.963	291.81	224.444	149.863	122.792	162.397	300.378	182.366	180.792		19.5653	20.6365	19.3564	16.9849	25.4537	29.4637	31.4918	38.0086	42.3423	17.5392		137.678	123.243	100.903	118.627	115.884	144.815	177.455	125.138	107.313	77.1388
198.433	167.068	123.043	161.211	143.466	138.833	106.707	138.952	248.623	162.782		307.285	191.618	268.653	237.447	134.894	103.101	161.933	307.82	190.51	212.925		21.3824	19.1457	19.1343	17.5885	26.1565	27.639	31.8715	42.2676	39.4348	17.5331		144.477	126.137	98.8883	127.207	118.9	152.281	197.151	125.493	109.889	79.0837
205.038	166.235	119.496	168.508	131.278	142.347	118.1	142.001	258.431	165.762		296.342	194.8	266.959	228.099	134.738	114.029	163.482	305.367	192.893	222.316		19.8582	19.4601	18.7964	17.8476	22.7527	28.2531	32.7848	43.4999	39.4355	16.2138		151.562	114.152	87.5342	132.028	113.104	156.097	184.798	121.84	113.177	81.6391
202.249	155.447	122.213	176.985	126.821	150.013	127.252	148.749	256.581	167.522		285.45	197.653	269.378	228.184	132.734	105.502	155.29	287.872	191.529	229.139		20.2406	18.98	17.6451	17.6739	23.4334	25.8653	35.5613	44.6083	40.2583	15.9984		148.085	108.642	90.5134	139.332	112.462	152.741	178.744	118.958	110.543	81.6486
214.074	160.129	124.307	186.124	132.416	160.993	138.226	153.904	254.454	172.437		285.87	204.262	265.806	253.717	120.903	131.545	149.852	268.824	185.712	240.874		19.7658	17.6945	16.2747	18.0515	16.8541	25.962	31.3042	45.5143	37.6518	15.7283		154.289	100.89	84.1835	145.025	109.624	151.838	196.276	110.694	110.819	80.3645
221.961	156.675	127.167	188.708	137.698	159.696	146.722	157.243	253.311	178.222		291.146	217.693	257.204	249.446	110.773	133.406	145.788	253.848	181.888	230.35		17.029	18.9839	16.6862	19.6862	20.9339	22.873	32.4602	46.098	36.6437	9.71907		154.711	99.6846	80.4407	145.361	128.845	156.658	190.977	123.028	108.739	82.7871
226.329	150.116	127.55	193.322	134.976	147.489	142.554	171.551	245.789	178.71		294.4	232.252	250.753	229.773	115.949	129.552	144.584	239.473	193.226	217.933		16.5561	18.8201	16.4344	19.9621	17.715	23.1502	39.3535	44.2638	39.9337	5.78303		155.508	91.8629	79.5393	149.345	132.071	162.866	193.89	141.961	107.421	72.7607
230.571	155.221	124.229	208.16	132.24	135.209	136.179	177.959	240.296	177.406		303.874	250.675	260.567	243.025	109.64	143.606	130.041	224.284	185.255	214.274		18.1652	19.6957	15.8114	18.8248	17.297	20.8844	37.4774	40.1399	38.5366	2.32151		153.219	90.9539	78.7182	140.97	130.825	164.636	166.331	148.249	100.066	70.5673
238.09	157.665	127.293	224.769	147.418	128.649	132.427	177.625	224.228	178.169		309.708	265.142	261.38	245.178	106.702	149.583	118.943	217.325	184.158	189.045		19.7624	20.5393	14.7991	19.3464	19.5311	22.0578	39.7583	44.299	40.5777	0.749564		156.688	91.8528	81.5551	129.694	134.846	174.716	131.976	136.481	103.419	70.7045
245.304	154.908	131.518	233.216	155.155	134.142	125.121	177.714	222.324	182.404		309.026	264.577	262.182	219.887	120.058	153.634	122.777	215.304	181.077	181.677		20.1634	21.084	14.7604	19.4042	18.2605	23.4991	41.7255	41.9037	37.0206	3.45543		155.575	94.0869	79.5417	125.812	144.15	174.209	135.395	138.19	99.563	62.492
235.652	153.667	132.928	245.497	159.947	127.456	126.901	168.592	216.6	174.649		311.742	276.674	273.45	202.392	126.236	169.031	117.512	221.592	165.625	155.482		17.7182	22.7448	16.4277	20.3914	19.6288	24.2615	45.1102	38.6968	36.5735	5.29825		151.273	91.3281	79.2887	113.298	139.449	173.066	111.581	143.116	97.6516	63.5927
223.545	150.931	137.521	255.308	169.924	121.71	128.742	166.714	214.726	173.28		313.438	278.152	273.071	203.177	126.798	163.683	119.301	231.379	159.359	147.564		20.1361	21.3788	16.6632	21.3335	19.6796	22.7811	44.9335	39.5712	27.6169	9.55424		148.817	88.9173	80.2666	99.7191	140.592	173.13	119.14	143.039	101.988	60.8947
228.638	160.593	137.24	263.022	175.842	110.271	128.616	169.079	222.5	170.835		311.101	285.241	290.796	194.098	126.969	176.91	121.244	241.114	159.268	133.462		22.0497	21.3794	17.6589	21.4688	17.1636	21.3069	46.7663	49.2999	20.9397	10.6379		149.897	91.2572	73.3172	86.9004	136.419	181.021	131.746	150.918	106.519	62.1604
228.271	163.532	142.152	264.392	173.381	92.2167	127.359	171.012	227.686	170.999		293.23	289.766	302.531	186.259	136.937	164.852	118.535	248.669	157.901	131.737		24.8419	21.5836	13.1587	20.8591	21.9848	21.3765	48.7543	46.65	12.4651	14.5361		149.542	89.3331	76.604	74.4287	139.193	193.893	137.335	162.275	106.141	57.2387
224.216	169.53	141.378	258.207	172.317	84.0144	131.53	178.919	224.645	166.41		279.878	279.181	295.153	176.674	141.097	166.713	120.87	246.464	154.935	135.223		25.0209	20.7681	8.83925	18.4425	18.5458	19.6912	48.683	47.1697	7.30631	12.5594		150.218	90.3079	81.8939	63.1374	130.652	174.869	147.797	150.968	112.159	52.9385
215.313	178.542	146.328	262.881	174.909	96.1116	140.284	161.395	235.344	156.22		271.856	273.076	285.562	165.696	134.716	172.387	117.281	250.991	143.068	141.763		22.3693	22.4888	6.92355	17.5548	19.9628	18.2338	41.8398	54.3934	3.05442	13.2959		146.683	93.3277	82.6238	52.6122	133.548	165.757	149.639	141.771	114.603	54.4941
212.503	178.224	153.543	257.97	184.254	108.579	141.754	155.445	235.484	154.984		266.102	262.345	270.741	168.695	141.568	172.967	120.69	246.929	149.565	147.918		23.1827	21.7939	4.02184	18.2464	21.236	17.5632	41.5844	51.5124	10.1327	16.0181		141.805	90.5301	89.2182	45.5439	129.583	161.924	151.078	131.962	119.592	54.3275
217.522	187.581	152.889	249.988	182.314	121.3	147.709	157.218	243.875	149.721		255.587	257.111	266.838	186.687	143.426	173.685	127.186	243.859	150.048	169.61		24.8753	22.1499	0.00211669	18.1762	21.9066	14.9652	39.5019	44.3768	17.0419	16.1836		132.515	88.1669	93.8187	42.6437	118.688	148.809	154.136	139.689	121.574	55.7068
212.48	191.515	157.028	244.281	181.072	123.908	150.016	156.598	248.545	143.266		254.365	257.078	261.206	199.159	126.596	170.853	122.573	239.27	157.83	167.231		26.7562	23.9734	5.15237	18.235	25.3332	14.7293	39.0182	45.5247	24.468	17.9612		129.383	83.8245	99.9159	38.373	101.259	143.282	161.376	142.755	121.293	60.8006
209.49	199.079	163.154	236.701	178.254	128.465	143.875	154.279	251.518	144.234		246.969	248.932	257.639	214.488	116.592	160.01	119.291	235.24	161.963	173.023		26.0326	22.4862	10.1923	18.6275	23.1962	15.601	38.868	47.8881	31.656	17.3804		127.974	82.8705	108.703	39.9014	94.25	131.892	154.114	152.619	123.816	59.4993
209.005	205.186	170.857	231.827	169.459	125.314	136.952	146.656	253.638	139.885		246.748	255.327	257.543	225.922	111.301	144.142	123.404	228.965	161.597	178.688		25.155	23.1689	12.117	19.1622	24.3601	18.2986	37.621	48.0394	31.1868	17.3152		127.675	85.059	115.896	42.5165	91.7654	125.082	172.331	153.151	112.694	60.9093
204.002	200.821	181.936	229.557	164.613	131.397	134.052	139.204	246.97	141.379		249.142	248.832	235.879	248.02	109.331	150.605	123.627	221.705	157.484	177.079		24.9837	24.0265	16.7054	18.9466	24.9983	20.5055	30.9189	41.2273	31.1868	18.9183		127.346	85.2475	117.65	48.8704	87.4352	117.261	157.581	146.751	110.559	62.3373
197.707	206.173	197.111	226.434	166.955	147.639	136.499	138.81	237.775	144.898		259.259	247.888	223.766	254.787	105.709	135.242	134.241	218.741	147.598	202.201		23.1727	24.9923	17.2752	19.4948	20.4449	22.7101	29.2039	37.3175	29.0713	17.9293		127.094	86.2744	122.226	53.3816	80.8298	105.868	145.484	127.378	116.471	66.4166
193.927	202.822	215.241	232.176	163.628	153.49	137.312	130.82	235.672	145.604		280.814	262.789	232.884	270.682	113.134	122.482	150.529	217.629	140.299	213.793		22.5218	24.5038	18.6554	19.7637	24.0456	23.3783	33.0451	40.3073	32.6433	18.8348		127.103	84.2186	125.976	64.852	75.3944	114.799	144.29	129.136	111.138	73.5606
199.33	193.698	227.549	227.378	163.436	153.729	142.722	146.836	224.078	155.826		310.199	272.898	238.084	288.509	102.097	101.263	158.111	207.418	136.27	221.903		21.1509	25.9891	19.0827	20.6132	22.2733	24.3833	31.9871	39.5413	31.3917	18.8287		132.462	79.7994	140.748	73.9973	68.6455	108.288	153.384	124.635	107.483	77.5959
195.907	186.085	241.326	221.326	156.918	141.344	148.733	147.94	219.57	150.742		323.578	290.735	234.361	285.387	111.679	83.8549	157.879	208.169	125.331	215.439		20.4571	26.5114	17.9055	21.7923	25.3741	27.6355	34.2085	39.5413	31.7493	15.6974		141.328	80.0319	148.442	87.246	60.4974	103.647	170.641	127.105	101.693	79.5111
180.604	182.966	255.414	219.897	162.232	133.532	149.86	152.019	213.964	153.968		342.543	289.433	239.262	268.986	116.356	70.8	159.877	198.769	105.945	190.143		18.8428	26.6122	18.8116	20.2894	25.79	29.6471	33.7347	41.7693	32.406	17.595		155.519	78.2276	154.684	96.7041	68.7855	108.723	167.464	120.86	95.2558	79.1237
181.993	177.635	263.341	219.62	171.897	135.118	159.908	158.299	206.175	158.714		349.936	290.765	256.154	260.814	127.573	55.3938	166.279	195.412	99.7999	193.544		16.5005	26.1788	18.5371	20.2632	22.7624	28.424	33.5338	42.2368	29.6638	14.8454		162.836	82.9048	161.568	105.132	72.2326	110.302	182.373	125.215	106.317	78.7375
185.806	170.966	269.838	215.36	177.226	132.423	167.581	162.649	210.11	160.755		350.294	294.957	256.434	246.851	145.583	46.3867	174.536	190.831	87.5926	184.789		20.3833	28.7729	14.1799	20.9562	22.7568	27.47	35.0453	39.6205	27.4121	17.447		170.645	85.1023	165.619	114.593	77.7228	116.417	202.524	111.96	99.3015	75.0354
186.548	162.542	270.013	209.804	193.861	153.368	176.395	174.703	207.323	165.971		362.875	293.753	245.655	239.29	149.524	54.1697	169.84	189.658	88.5557	173.446		20.8724	28.7346	10.3855	20.5043	23.6075	27.0738	35.8706	39.4687	28.5759	15.9235		178.535	86.923	169.032	124.157	80.4643	124.258	190.544	107.96	107.017	79.1093
188.409	157.351	272.385	204.926	206.548	163.857	182.472	180.895	209.479	169.418		365.974	298.79	265.442	217.986	153.219	33.7248	173.303	197.784	105.796	174.264		18.5387	26.7753	6.24637	20.3793	26.019	26.3229	41.4515	39.0982	27.8467	14.4524		181.087	85.0117	173.877	130.562	80.8824	130.364	196.175	107.247	105.406	78.5598
194.437	145.309	267.429	206.127	214.715	170.748	182.088	183.866	215.47	170.781		377.577	301.667	263.416	216.611	156.578	32.4253	166.123	195.319	120.275	138.404		19.2812	25.8574	1.89211	20.1629	25.3231	23.9485	40.0949	43.0079	28.6801	14.9503		188.126	88.8196	172.296	135.357	79.3672	131.931	221.149	106.929	102.5	83.7678
202.839	138.874	268.486	206.273	198.677	183.895	180.553	194.039	219.73	175.104		373.372	292.121	253.399	215.94	151.318	43.1273	158.157	195.698	125.874	125.36		18.8173	26.2996	4.17332	19.7167	22.3156	25.4045	36.325	40.0367	26.7125	13.3924		195.909	84.7386	175.045	137.916	77.2173	132.274	214.881	103.399	103.909	79.9667
200.869	140.105	267.755	206.235	225.311	184.306	178.771	191.959	228.952	171.726		353.858	285.348	250.385	216.771	170.043	56.4371	148.959	201.797	127.079	103.56		19.4739	23.6506	8.16924	19.3766	21.6171	27.4063	39.7629	34.573	28.012	15.8604		201.51	84.3089	168.466	141.291	79.5172	139.033	194.676	94.1694	107.689	75.7117
205.531	145.115	262.196	200.617	238.359	204.087	173.566	204.974	239.412	181.121		350.101	266.027	256.802	248.805	163.25	66.2415	150.955	206.775	136.884	92.085		18.1097	21.5529	11.5636	15.2114	17.82	25.3657	37.1919	34.573	27.1632	15.1425		203.976	85.3604	163.157	138.496	81.7878	141.608	175.52	100.411	108.186	75.0679
218.391	137.546	262.464	201.028	228.54	219.843	170.092	208.81	253.205	179.775		351.26	264.362	259.78	264.096	156.886	75.0373	149.113	218.026	147.967	85.0643		16.2831	20.7971	15.3455	14.3873	15.6305	24.1788	42.0817	35.4292	27.8133	13.2043		202.73	80.3858	155.111	145.925	78.1419	130.761	167.203	96.1265	109.831	74.2466
214.84	137.954	260.625	203.223	214.538	228.46	168.202	209.728	256.64	182.36		364.335	257.538	241.977	294.443	145.925	81.2749	139.752	229.3	149.046	71.6426		20.7862	19.0615	19.418	9.93956	16.0417	25.3588	40.8082	40.3032	28.0048	16.2919		195.438	77.422	142.301	151.317	82.3906	146.119	147.023	88.0677	101.543	75.5782
215.869	130.737	270.991	204.739	198.747	245.206	178.281	220.127	252.671	187.737		374.163	254.476	241.281	340.453	130.946	95.6033	138.486	232.677	154.74	62.8364		17.7489	18.6173	18.8632	3.02262	16.0085	25.7823	35.0492	40.8067	30.2565	15.01		188.608	78.5663	136.059	153.634	85.3417	145.716	162.242	93.1895	106.856	79.501
219.598	127.108	279.996	204.079	175.44	250.332	184.184	223.755	256.717	181.506		371.606	255.439	257.861	358.04	132.107	99.1879	137.502	227.072	146.998	56.2294		15.4137	16.988	17.6427	2.01531	15.0983	23.1496	33.9524	41.05	31.247	14.8554		185.085	76.8639	128.324	152.569	86.4733	141.778	160.34	95.8645	101.375	74.0732
228.784	126.03	285.807	198.23	148.879	261.61	186.433	233.549	253.277	171.988		375.716	253.777	238.347	379.429	131.335	109.405	131.44	215.201	133.789	47.9678		17.2797	20.1816	15.6259	6.13204	13.9831	24.7389	30.4641	41.05	32.1958	16.5325		189.457	73.1725	127.177	145.653	91.6925	140.644	161.136	88.8118	104.334	74.3964
231.915	125.57	286.878	186.903	122.581	262.009	188.996	234.889	244.826	166.174		363.524	257.464	246.901	378.957	133.887	124.06	133.798	214.581	122.118	47.7672		15.4029	21.3934	15.1016	10.913	17.179	25.9326	31.1481	41.05	33.8322	16.3981		187.122	69.6324	128.732	141.156	97.5479	134.415	138.221	94.8326	103.94	71.6911
233.629	127.467	278.465	181.442	123.122	264.614	189.789	226.273	236.31	153.854		352.031	264.437	251.443	379.53	144.019	131.84	132.04	208.758	124.869	37.5321		20.503	22.2284	14.6955	13.7696	20.0611	25.6996	35.6858	47.0691	34.4945	17.9559		181.216	73.4116	122.842	136.232	103.32	129.399	138.364	103.68	103.293	72.3426
241.559	123.023	275.439	176.227	82.2787	268.014	187	233.417	224.165	151.91		352.882	271.493	254.681	379.241	137.999	126.282	132.124	202.103	120.909	34.7553		22.0051	22.9115	14.7047	18.3617	20.8308	23.5573	35.3261	47.4259	37.5864	15.0294		178.84	77.0395	125.059	135.391	105.728	138.184	144.337	116.2	103.628	72.131
246.187	129.035	274.765	183.35	55.8151	262.178	188.536	231.141	221.117	142.03		354.623	287.379	260.604	349.103	136.426	125.409	135.823	198.981	110.272	30.8673		20.3201	23.1975	15.5811	18.4377	21.0126	24.155	36.539	46.3676	38.5324	17.914		177.081	78.1054	124.537	139.371	114.75	141.2	145.567	110.846	105.701	67.4276
250.504	125.965	273.617	181.495	44.8569	251.922	191.085	232.578	210.9	137.915		347.111	301.202	250.909	324.688	147.07	129.435	129.49	198.233	107.652	26.3635		22.6619	22.5617	15.5846	20.1765	19.6846	23.7915	32.6094	43.5892	38.3437	17.6567		177.279	86.9331	126.538	132.845	122.485	159.309	156.076	118.989	102.276	68.2006
262.073	127.682	280.544	171.705	38.1472	247.916	189.455	232.369	213.334	129.444		335.841	312.378	242.423	301.143	146.555	134.133	133.672	193.294	100.266	31.0778		19.0395	24.2074	16.6246	19.2517	17.8352	21.8886	34.5915	35.3971	42.4662	15.4626		184.99	83.452	135.344	131.521	119.592	148.091	156.099	114.108	101.55	67.2846
262.048	130.151	270.215	161.204	37.2614	240.63	182.557	229.528	224.224	119.765		330.19	311.617	259.971	265.66	155.456	124.36	130.689	194.027	96.0525	32.4559		18.6692	24.6023	17.156	17.4352	14.9014	21.2527	36.4231	35.3971	42.4662	15.4409		187.722	78.4631	138.145	131.727	120.428	152.09	129.887	104.097	97.7433	64.3357
268.16	131.956	268.566	146.682	44.2826	229.19	183.402	230.966	222.973	124.433		332.748	313.511	253.786	247.177	149.741	121.368	159.459	193.827	99.78	30.7085		18.68	25.8855	17.7208	16.2975	11.0895	22.1037	42.6885	35.1543	45.3151	16.6475		190.06	79.3441	155.577	134.528	116.437	150.589	119.547	97.8901	97.5618	73.1488
265.328	130.815	257.7	139.437	58.2007	215.788	190.573	228.49	231.234	130.642		340.767	317.329	249.821	235.177	149.228	115.248	172.883	198.714	90.9171	30.3271		16.2783	22.3123	18.7804	11.5423	8.45763	21.4598	43.601	35.1543	45.0955	17.3049		187.859	78.5577	159.359	137.351	119.156	144.7	120.61	103.695	97.4292	76.6963
256.371	129.553	252.914	148.131	71.2509	210.808	198.076	230.046	236.93	136.874		353.232	309.91	236.364	239.213	144.62	107.829	172.392	197.732	92.5766	32.6679		19.7493	21.9847	19.2732	6.64794	3.23598	22.0668	41.4135	35.1543	43.1515	17.7979		190.564	80.0564	166.906	139.549	121.281	150.069	103.457	101.758	91.5401	79.5005
251.345	137.355	252.563	143.378	82.8209	201.639	200.487	233.744	241.595	146.16		360.497	304.133	227.345	244.957	138.818	98.6734	173.741	195.139	85.8	34.568		16.4107	21.8604	19.1248	4.7441	2.90786	20.3482	37.0535	28.4104	40.8066	15.2722		202.253	76.0169	168.596	142.179	115.856	151.918	143.24	92.1593	94.1265	81.6604
242.264	142.202	257.372	143.949	90.9712	196.693	183.53	224.493	251.73	142.554		363.206	296.911	217.808	253.342	139.666	93.165	178.81	196.088	85.647	47.8269		17.8679	20.8764	19.5424	1.01264	9.12193	19.607	37.3599	27.1872	41.3545	12.7331		206.113	74.2479	164.209	140.793	115.133	153.567	150.648	84.0471	95.1191	85.7352
236.414	142.761	262.646	138.039	105.031	189.2	191.093	218.932	243.67	147.176		356.623	285.992	199.29	269.277	138.125	89.6015	177.585	192.147	81.5751	68.3658		17.8872	23.0979	17.6497	2.80805	11.6418	19.5189	38.0532	28.2455	42.1601	8.91646		209.581	79.5771	168.594	140.872	108.705	147.692	150.204	87.0281	92.3704	89.0254
228.941	150.224	270.633	132.087	119.443	185.33	205.555	217.275	248.658	146.085		344.773	277.209	194.763	288.693	132.088	79.2122	183.463	187.845	87.0034	77.0211		16.2253	22.7346	17.0958	7.32307	12.7375	18.7366	37.9162	34.3211	40.9237	4.80706		208.224	72.9872	171.23	135.94	102.032	137.124	160.59	84.5779	94.782	87.708
220.453	146.073	276.338	133.17	130.083	179.489	204.109	222.549	246.492	153.693		339.351	266.161	198.587	292.742	132.611	78.5974	175.926	178.07	92.2678	79.8863		18.8748	19.3291	16.1405	9.04442	17.1509	22.4419	35.7685	35.4086	41.9144	3.06432		200.371	82.3604	171.648	140.977	102.694	135.576	169.68	87.8867	89.164	89.8225
213.455	149.922	284.83	133.207	139.949	181.599	184.965	222.846	239.251	161.747		350.591	272.253	173.678	302.804	136.006	76.5438	174.562	171.93	102.867	89.5564		20.7638	20.7533	16.769	11.8769	18.7941	22.9562	37.2986	35.4086	38.7697	1.14112		201.684	85.2715	171.446	143.444	100.589	132.298	176.111	96.3957	94.6891	91.2679
205.315	154.097	285.733	146.275	147.997	181.587	158.822	215.626	239.576	160.225		331.434	270.656	168.746	309.139	145.621	78.5517	151.111	175.806	121.609	94.1855		21.1995	19.6126	19.073	16.7506	19.1822	23.3029	34.1282	34.7765	34.2781	5.81162		198.647	85.273	159.181	143.726	117.838	128.075	189.727	103.134	96.8621	82.4124
196.567	158.512	290.593	162.499	151.244	192.152	132.59	216.325	226.166	161.519		327.156	274.296	167.169	312.935	148.492	83.8501	133.672	164.107	129.322	107.175		23.7324	22.0937	19.5594	17.0679	19.9717	23.1235	32.2765	34.5045	34.2781	8.72503		198.826	94.782	159.93	147.149	126.443	133.625	194.561	105.814	91.2557	79.6239
198.997	162.53	293.784	160.419	153.306	202.806	110.512	216.157	223.349	157.281		321.356	287.068	171.171	300.018	151.267	84.4637	144.463	171.923	130.686	113.005		20.388	20.5353	20.767	16.7318	22.3788	23.5665	34.7896	32.0967	39.5919	12.254		192.152	104.805	155.764	153.064	130.635	130.073	209.552	111.866	93.5882	75.4796
194.706	147.382	296.548	167.599	160.662	210.435	102.99	218.162	218.348	158.972		321.053	292.923	175.456	289.292	150.581	91.2122	138.194	169.307	139.601	123.851		20.3114	19.9786	21.0407	16.6416	24.9819	25.5907	36.3914	30.8174	42.4244	12.0949		183.915	114.214	160.388	154.124	143.263	141.749	173.68	117.913	87.5551	73.8606
196.825	156.718	293.706	173.677	167.143	225.907	134.376	228.9	215.261	166.556		309.623	299.938	174.869	278.18	149.826	110.423	138.745	161.723	151.831	130.439		18.5424	22.2444	21.0489	17.4266	23.621	26.819	37.204	39.518	38.2654	11.5481		177.098	117.569	154.905	161.289	141.208	119.236	168.051	125.991	85.9637	73.0496
202.252	151.687	289.252	187.043	170.231	231.328	130.378	232.145	221.315	167.643		317.296	307.694	185.191	265.669	151.555	123.357	131.765	163.503	162.327	122.711		19.8734	22.8133	21.2494	18.4653	26.1796	25.4929	39.4271	39.518	37.6812	14.9743		181.646	112.259	147.366	160.88	143.717	130.059	164.914	115.803	83.81	74.2748
201.581	140.659	285.29	197.444	167.366	242.579	112.493	229.403	213.38	177.034		333.26	302.177	192.934	259.937	154.123	135.496	119.854	162.698	160.428	142.863		20.8665	23.4048	23.0248	18.4309	29.1739	28.533	42.3814	36.1132	37.8661	13.8438		182.962	116.808	145.714	163.357	142.829	120.327	155.874	111.887	81.8824	75.4315
203.707	147.604	278.566	202.883	167.441	246.651	108.833	220.457	211.188	174.778		337.281	306.982	204.834	251.909	156.644	137.395	121.834	168.414	193.413	152.504		19.1037	26.2788	22.4843	19.3078	27.4028	28.2339	43.1232	44.0627	32.8081	14.6004		183.874	114.709	143.016	153.048	142.429	120.691	150.352	117.818	86.6825	72.6365
204.196	151.259	272.999	210.23	171.522	240.768	123.111	216.27	208.1	174.145		328.353	308.484	219.085	246.325	155.49	147.215	119.758	169.903	200.544	174.547		19.9432	23.9123	21.8095	19.0737	29.2028	27.9592	43.749	46.6637	32.7539	13.5591		180.953	109.335	145.66	146.281	145.579	121.481	144.999	114.812	89.5741	72.1073
210.674	142.984	265.492	210.512	173.943	243.951	135.343	225.246	202.317	179.169		334.109	305.356	220.709	254.347	149.605	154.59	114.673	165.268	188.636	194.675		19.4197	25.4373	19.8161	17.8998	25.6408	27.9592	42.071	47.9582	31.8765	12.7562		180.061	103.55	152.666	145.358	138.309	122.345	138.521	116.593	87.2253	74.1878
216.425	142.984	263.861	206.105	173.214	234.079	146.582	222.729	213.693	174.754		324.941	303.732	223.221	238.187	158.143	161.835	122.742	176.832	194.743	211.551		16.5191	23.206	18.7874	17.7544	20.1722	29.1991	48.5017	49.1495	31.152	16.27		183.651	89.5925	150.201	144.89	134.061	137.099	141.122	122.057	89.7576	73.8944
216.07	149.782	263.554	206.614	174.872	227.483	156.593	229.406	211.666	179.889		321.552	291.196	214.965	244.001	158.892	174.456	104.091	161.865	197.531	228.511		17.6961	23.8255	17.384	17.7167	11.6901	29.6956	47.418	50.5585	29.548	17.0284		190.565	77.7575	156.548	138.97	135.676	142.362	138.307	125.485	89.8046	73.9612
220.421	162.833	261.808	201.845	175.483	216.406	154.603	237.009	217.659	174.603		314.608	287.033	210.257	252.114	161.418	172.511	106.219	166.873	197.464	249.227		16.8321	23.8255	17.5724	18.1642	6.2409	27.748	45.6386	49.7023	27.6066	20.8369		194.879	67.161	163.237	139.376	147.32	128.326	134.984	130.635	93.6933	72.0085
218.518	156.757	264.594	197.237	179.299	196.951	134.555	233.643	220.157	171.921		324.873	277.512	207.776	263.307	161.753	169.649	97.6542	170.967	196.189	253.707		17.09	22.4198	17.7628	17.2123	2.1823	26.9567	43.1996	40.9772	32.346	20.6896		197.075	65.8564	177.822	129.836	159.977	148.703	143.844	134.294	99.1625	69.5319
215.584	160.46	273.374	186.102	180.832	189.793	122.322	237.445	218.027	169.985		309.432	268.805	196.759	282.254	154.999	167.879	95.142	167.852	195.176	266.732		15.177	20.9755	19.2657	11.2192	7.63625	27.5293	44.4753	39.4075	32.9595	18.6119		189.314	69.0614	181.625	126.779	170.195	138.998	158.712	142.842	116.894	68.8038
216.912	171.5	271.348	183.182	183.42	183.124	123.066	240.546	227.793	167.404		298.869	263.627	196.444	286.124	155.02	181.057	107.766	169.102	196.283	258.191		13.8452	21.1665	18.8484	6.82167	16.683	27.0733	41.521	38.2592	35.9673	20.9285		189.578	60.4426	187.615	127.685	170.201	147.656	146.403	146.345	122.43	69.0305
219.555	167.334	273.197	180.792	190.114	187.528	121.872	243.504	236.68	178.547		297.426	257.982	182.019	298.224	166.757	196.172	114.665	164.774	165.125	268.58		15.8488	19.0815	18.492	2.72044	20.208	25.4125	38.7661	34.855	36.4522	20.8937		193.501	61.5551	192.416	126.002	171	137.373	146.132	134.86	125.781	69.0613
224.885	174.482	268.935	175.939	192.395	201.108	117.253	251.733	237.186	181.573		294.436	258.365	160.889	297.077	168.483	201.355	108.814	167.802	151.045	257.35		16.8037	18.929	17.2687	2.89669	26.811	24.7341	40.8473	31.359	37.9372	21.2235		196.942	66.944	179.276	124.735	172.683	139.817	150.44	140.742	129.015	67.784
226.095	180.825	269.965	171.322	193.815	201.294	120.387	247.209	243.779	181.54		299.329	250.408	150.044	281.106	178.262	204.968	103.553	165.719	146.517	251.43		17.5489	20.5639	16.7158	6.92877	30.0552	24.242	40.1116	28.5126	39.0476	21.2931		199.537	72.7291	177.554	115.487	167.77	139.314	150.462	143.233	131.332	67.7364
220.171	179.307	267.871	167.104	197.951	209.567	128.774	255.025	234.789	182.736		306.13	248.292	135.737	292.735	169.661	210.104	101.725	162.632	132.144	247.842		18.2364	21.3313	17.6844	12.9963	26.5533	22.306	38.2639	19.3686	39.1327	19.657		204.055	84.9638	180.887	119.662	156.011	134.736	173.1	139.87	139.049	65.9371
217.408	172.738	258.663	165.781	194.832	207.087	132.766	254.16	238.414	179.163		316.426	258.403	137.891	286.342	170.794	207.527	111.856	170.891	122.244	236.425		17.1677	19.2872	17.4694	16.9749	24.5997	23.2907	36.4923	14.5994	36.7048	19.8331		204.855	92.1943	183.19	118.572	141.225	133.525	188.06	137.011	152.181	67.0018
213.427	173.696	256.951	170.911	193.968	209.758	136.291	245.251	232.626	183.288		327.968	265.926	131.42	283.911	165.549	213.395	107.623	169.695	118.369	220.72		17.5739	18.9258	16.1498	22.8567	24.814	25.5445	35.0838	3.02696	38.2832	16.9281		200.538	99.8226	179.883	119.279	123.029	137.394	192.943	131.617	163.684	65.8595
211.598	171.681	252.215	168.821	193.033	211.747	139.281	247.146	224.632	180.518		325.56	280.343	134.523	273.592	170.645	211.803	116.148	173.084	103.777	219.881		17.5181	20.7429	14.9151	26.0831	20.6059	24.7788	38.7465	2.27517	30.599	16.5569		201.388	103.507	179.443	125.872	113.443	127.445	187.08	126.938	172.733	68.6935
199.588	170.505	237.65	177.388	192.947	220.032	143.455	247.472	225.827	182.663		331.049	293.322	143.775	255.838	178.38	213.592	128.655	177.103	94.3132	216.36		20.8762	21.7502	13.8461	25.4922	23.5057	23.8497	40.4318	12.5847	28.7123	15.6512		200.794	105.731	180.763	129.765	102.998	135.645	177.118	137.207	168.954	66.596
212.531	154.208	228.954	180.728	193.338	224.237	140.169	252.771	216.792	182.638		327.513	318.897	141.661	248.13	185.339	198.98	129.24	173.939	82.4614	214.812		21.9262	20.5565	14.584	25.5485	19.4486	22.1413	40.8036	19.357	18.125	12.825		196.81	115.715	181.477	142.673	104.957	139.649	189.209	142.414	175.075	60.9253
214.404	170.037	223.025	183.379	184.958	224.738	134.442	256.98	212.086	168.149		324.432	333.59	146.485	248.346	175.226	186.287	143.213	182.981	73.018	212.064		19.2158	21.4221	14.9466	25.2329	18.3027	22.0578	47.1081	33.5773	11.5595	13.2035		194.568	113.231	179.055	151.154	99.6982	144.677	187.86	149.849	184.683	61.6192
218.742	162.934	219.217	189.282	182.214	215.626	135.307	246.812	213.659	161.323		329.872	330.559	153.124	253.202	173.474	181.457	153.195	184.498	65.4673	213.682		18.2896	21.0556	14.1232	26.0286	17.9393	21.9453	47.7251	42.4958	5.67898	12.6958		199.915	117.024	191.626	155.099	96.2706	146.836	180.798	143.869	180.701	65.03
222.943	180.165	210.842	194.632	180.631	215.396	129.068	241.178	209.31	153.2		322.25	345.001	171.596	261.554	164.585	173.444	162.77	193.243	56.9419	224.505		17.1812	20.1692	14.1882	25.3161	15.5075	24.3404	53.0765	49.9624	0.800994	12.4936		198.597	123.481	190.485	161.351	97.3194	148.689	179.553	140.121	187.971	65.5295
232.899	185.132	209.521	201.272	177.725	207.901	109.593	234.319	215.462	155.378		312.778	343.276	180.301	266.805	169.249	166.946	159.37	200.257	66.3307	223.296		19.7693	20.4848	14.7087	25.0591	17.0449	24.4258	50.8068	50.9308	4.99676	13.5203		192.712	124.549	188.601	161.126	106.529	140.135	149.765	138.168	182.202	67.4058
237.229	187.742	212.214	200.254	179.932	212.031	92.0202	223.423	206.759	156.9		299.48	333.03	172.437	278.272	160.319	167.312	153.695	198.902	66.4356	252.91		21.8295	20.2923	15.6253	26.3386	16.0782	23.8077	58.1445	50.4368	13.0866	13.0376		189.551	128.866	176.442	169.381	107.168	142.895	134.476	135.021	174.255	68.6487
239.97	193.13	215.122	199.281	176.315	211.764	80.0889	216.747	205.463	156.944		286.923	328.943	182.447	277.784	167.315	162.322	160.706	204.268	72.6756	258.467		22.3768	21.2673	15.7987	24.3003	14.7301	23.0215	60.6357	44.0482	20.4714	13.5805		189.779	141.85	166.595	173.661	108.393	136.939	124.013	137.622	166.786	75.011
238.756	197.669	208.276	203.561	172.536	216.411	70.6871	205.899	208.421	162.945		286.535	322.42	176.355	282.182	160.422	169.15	154.801	205.354	89.4019	249.966		22.9604	20.5032	17.6106	21.1705	17.4615	22.7048	55.57	44.6461	22.2093	13.0114		189.223	145.41	155.335	171.51	117.653	145.867	110.555	136.211	156.384	71.588
243.751	205.087	211.161	198.724	165.261	213.498	61.571	200.171	203.077	162.151		291.784	314.718	178.844	286.618	155.204	179.126	142.129	202.19	86.79	247.464		21.4935	20.9542	17.9949	17.7099	14.2575	24.1739	51.8634	47.3064	30.7624	13.3334		185.527	149.602	151.181	167.497	120.537	139.814	107.872	127.279	146.146	71.9166
228.729	221.24	212.808	198.427	158.014	202.936	56.0967	194.976	206.092	162.305		299.254	298.219	176.227	284.069	149.496	189.624	140.408	206.095	93.194	234.754		20.4458	24.4319	18.1457	13.2736	15.5339	24.0805	52.8164	47.6106	28.9528	13.3684		182.331	160.969	141.559	153.999	117.261	131.623	105.044	124.698	137.132	76.511
222.64	204.531	208.089	195.035	154.678	200.94	57.4662	189.655	199.805	171.198		302.77	291.114	170.613	280.722	142.384	185.676	123.372	199.706	94.9197	225.762		21.8915	22.9897	18.3718	9.18205	17.9918	23.8818	48.5785	42.3077	29.1721	13.0479		179.619	173.336	141.469	144.649	116.653	130.561	103.828	124.484	123.752	74.4662
218.11	203.223	205.539	187.319	142.532	195.176	58.119	194.882	195.848	175.691		294.643	299.835	165.063	271.198	142.328	182.332	126.153	189.907	95.2138	223.436		20.0547	24.166	19.1567	2.55583	17.4351	24.6655	40.995	38.6324	25.9604	13.3895		169.395	178.124	145.548	147.083	112.069	115.135	114.437	126.927	126.224	73.0425
207.784	186.068	205.981	182.8	130.676	194.076	62.2412	194.86	188.511	184.403		296.112	304.858	145.941	259.111	140.503	185.506	120.747	183.857	99.0922	217.34		21.1316	25.2404	19.9957	0.484176	23.856	24.3911	36.481	36.0253	25.7	14.2641		161.589	175.682	150.605	142.716	111.496	115.881	130.082	124.019	124.387	71.3547
202.154	191.712	204.454	169.377	117.947	192.876	74.5327	194.422	174.852	191.046		298.989	326.216	140.497	252.011	133.635	199.67	125.273	179.492	91.0119	213.332		18.5824	25.6076	20.6516	5.10447	24.9333	24.8116	35.1068	35.1476	19.5678	12.2745		156.379	179.04	151.503	137.037	104.979	116.013	126.907	123.456	124.188	68.1894
197.823	191.351	203.061	169.744	106.555	187.444	89.0515	196.476	175.724	196.225		298.303	340.698	140.135	245.489	138.069	205.644	123.104	184.149	98.873	183.805		16.7802	28.1467	21.3426	10.0577	26.1017	23.3063	31.4359	38.0984	11.379	12.2523		160.871	171.938	161.267	129.235	113.311	110.325	125.506	129.665	125.432	64.943
198.355	191.767	192.605	173.53	93.1712	187.506	100.499	195.082	172.336	200.237		301.024	349.891	129.927	246.098	127.361	214.656	117.455	173.915	87.112	182.064		16.4382	27.0804	21.2327	15.0485	27.1989	23.1	29.3901	39.4021	6.23229	12.7292		162.758	170.944	165.656	120.103	108.697	124.439	127.954	125.796	123.591	60.4593
202.37	182.406	197.306	172.251	75.125	184.814	109.414	198.561	165.594	200.772		299.534	361.824	136.722	237.07	130.135	208.357	118.606	173.924	79.2149	191.276		16.2888	25.9955	20.6659	14.5689	24.9491	23.452	30.3352	39.8307	4.43296	16.2947		166.171	162.019	161.358	117.305	99.0218	120.074	135.392	128.686	121.364	59.741
197.905	177.211	195.315	169.328	65.5583	184.359	119.136	200.101	155.973	203.374		298.845	367.765	126.795	239.376	124.766	195.493	119.56	174.296	87.0265	196.09		17.815	24.5644	20.4893	14.1311	29.0373	23.4527	31.6094	33.5165	3.35142	15.4573		174.369	158.831	173.015	119.221	96.1471	128.048	129.136	128.099	124.605	58.5113
194.603	175.882	188.624	160.123	56.8275	188.335	127.883	198.209	141.357	196.521		293.892	388.802	117.2	247.235	116.821	188.334	120.266	170.447	120.053	217.309		18.2796	24.1556	20.6939	14.5304	30.7995	24.0646	30.0883	33.5165	9.00421	16.1554		181.637	145.662	180.897	122.163	95.3128	138.21	128.342	122.503	124.613	58.3627
182.982	179.062	186.106	157.106	47.3107	189.144	132.629	196.618	129.401	192.486		296.947	396.867	113.313	235.257	126.097	187.79	125.598	173.284	130.979	220.065		17.0455	26.0217	21.6291	14.0739	30.1121	24.6456	32.166	38.7621	16.0309	17.8437		182.567	136.201	182.636	122.913	107.854	149.738	130.935	123.158	130.361	61.1923
183.934	178.11	173.244	157.857	39.2315	191.678	131.674	193.623	117.047	192.902		302.761	401.71	105.129	249.216	128.802	181.391	117.242	177.949	143.444	220.56		19.5848	24.6572	22.0468	15.3733	29.9246	25.5993	34.6323	40.9055	24.79	17.2028		180.151	133.251	178.992	119.798	114.499	163.969	118.962	112.614	128.408	60.2197
186.486	187.249	156.338	155.159	32.9174	192.58	134.801	198.958	108.572	188.416		302.788	403.7	107.675	264.95	136.261	170.411	120.24	177.866	151.625	212.358		18.3472	23.6566	21.5678	14.8728	23.8982	23.9706	34.8678	41.3787	27.0986	17.518		183.913	127.34	177.72	123.131	117.338	176.158	109.047	116.815	122.374	61.9895
182.952	183.415	143.683	165.954	27.2887	198.106	136.914	192.36	98.5326	180.847		303.331	394.191	118.509	273.271	139.893	152.945	123.137	169.468	166.673	238.748		20.3395	23.7273	20.918	15.4822	23.7301	25.8809	40.003	42.1727	25.9233	17.7433		187.137	122.29	177.534	123.271	115.149	181.423	135.95	116.678	120.491	71.3357
184.05	193.334	137.712	168.561	22.4286	202.911	136.936	195.48	81.965	174.726		320.192	393.605	128.198	278.736	138.411	139.998	128.981	160.404	174.24	245.998		20.0086	22.5756	20.6433	16.8215	22.4166	26.35	37.5979	44.9732	25.7128	17.6319		184.385	121.777	172.91	128.367	114.121	196.168	143.853	118.758	116.734	74.9897
181.53	204.322	138.14	166.904	21.1462	200.379	140.808	204.07	71.6903	169.551		325.47	386.693	141.505	281.663	145.666	129.764	133.638	171.345	183.233	247.682		18.7422	21.4731	21.5376	16.599	22.805	25.7635	41.8837	47.3193	26.4033	19.3559		183.963	110.695	170.663	134.08	118.259	198.153	150.347	121.797	119.485	75.1262
181.431	227.591	123.478	173.488	20.7947	201.555	141.497	201.52	66.897	158.493		326.255	372.138	139.888	296.181	146.653	129.594	142.804	170.555	188.861	249.6		20.6835	21.3197	18.9359	16.8023	22.8259	25.8947	40.3058	46.5209	29.3267	16.7279		183.558	110.264	181.351	139.051	118.789	208.996	162.096	116.405	120.091	75.6484
180.865	244.126	120.23	181.197	20.2232	196.972	138.755	200.18	74.76	149.753		321.049	368.798	151.989	290.988	155.136	125.101	166.558	174.192	188.048	246.837		18.8713	21.8629	18.7083	16.5163	18.8018	25.176	36.5088	46.2787	28.3104	18.8408		180.951	108.217	171.202	147.442	121.213	197.122	174.15	108.804	119.96	79.2614
173.61	249.677	123.983	190.182	26.5455	196.416	138.826	191.733	86.3428	148.518		321.405	348.922	172.649	281.54	163.14	120.495	186.206	174.769	158.874	250.484		18.2251	20.4221	18.3757	15.6144	18.3621	24.6063	38.2813	51.3304	31.3171	18.0499		180.774	105.313	167.294	146.963	124.593	205.884	182.332	98.3874	123.026	79.7241
178.205	259.347	124.063	196.393	34.7787	197.756	141.464	190.42	93.3384	144.104		319.938	343.771	194.054	288.831	156.054	134.558	185.753	176.071	157.209	258.997		21.0127	19.2656	18.0472	17.3912	16.799	25.0358	34.9782	45.5862	30.3327	15.1049		182.215	111.691	163.109	164.726	115.521	199.095	187.171	91.0032	117.25	79.9559
177.675	268.662	131.612	201.619	46.2599	193.369	145.727	191.255	102.16	146.653		317.683	347.569	228.403	270.188	151.02	138.097	203.319	178.406	153.67	252.828		21.1919	18.8505	17.3829	16.7882	17.1025	23.6492	34.9782	49.1238	25.9564	17.929		188.687	107.117	155.991	166.457	114.571	195.083	195.658	93.9544	118.399	80.2489
176.419	266.893	144.798	213.637	53.1015	181.322	150.14	183.061	115.19	153.181		317.192	348.099	242.871	263.615	144.241	147.71	206.641	177.499	151.882	251.274		22.7328	18.131	15.5061	16.4437	16.1898	22.3001	40.0228	49.3074	28.2731	16.6886		189.159	113.849	151.908	167.254	109.904	191.161	198.672	86.0999	117.468	78.1712
173.228	278.559	156.304	217.413	64.7306	171.266	160.872	181.461	130.786	153.262		307.965	360.161	249.851	256.651	147.9	146.509	209.611	182.362	141.285	220.559		21.3773	18.6969	14.261	16.7978	14.0919	19.3366	34.8875	41.3006	29.5756	16.5266		183.364	118.337	151.142	170.641	113.643	183.103	183.903	84.108	117.177	70.4132
171.562	269.586	159.524	222.329	75.3296	170.9	171.588	178.271	151.378	158.103		306.469	358.463	259.863	254.72	155.989	144.615	211.999	185.057	133.794	204.539		22.5246	19.2163	15.0603	16.9699	14.2062	19.0769	36.0636	30.2753	28.7102	16.8098		178.002	119.407	147.913	176.506	112.794	176.769	184.777	74.1574	115.218	67.9059
169.587	251.689	155.008	225.855	83.2482	173.655	174.783	172.584	162.08	155.862		309.026	356.563	256.52	248.612	145.309	156.736	213.364	177.962	133.687	193.789		24.063	19.9571	15.3855	18.7524	13.4181	18.7382	32.6821	13.0312	29.7095	14.5213		176.372	118.709	150.72	181.63	110.022	172.407	181.542	64.1755	106.786	65.5055
164.701	242.388	161.676	220.354	92.0247	165.979	180.218	182.851	171.421	156.435		301.801	370.943	259.692	245.941	144.079	153.866	210.525	179.728	137.236	191.859		21.7253	18.5449	16.3574	19.9791	13.6943	17.7192	38.4015	9.10699	28.5357	14.7542		178.842	123.936	149.016	182.352	104.797	167.857	170.863	63.3309	109.586	68.1471
166.413	226.579	153.517	210.259	98.261	163.871	196.124	183.429	177.674	156.811		301.415	368.523	254.859	247.257	145.003	155.959	192.11	171.36	141.65	187.544		24.6786	16.9687	15.2503	19.7335	13.9005	19.5231	41.201	1.12385	30.8412	14.5982		178.903	119.832	152.298	170.071	92.6163	181.182	164.713	67.6826	103.207	74.8407
170.168	222.907	158.172	194.885	97.1531	166.101	204.726	194.671	173.528	162.789		305.058	363.552	247.704	257.121	144.578	154.324	174.349	171.121	145.507	176.527		25.5872	16.6648	14.9162	19.2532	12.15	20.8748	38.5297	9.3693	28.5871	17.4188		177.475	122.047	156.623	175.194	90.4823	168.898	157.349	74.7663	102.623	78.6302
167.728	210.006	157.998	184.276	92.1837	160.911	217.146	200.577	180.938	168.68		302.713	365.951	242.385	261.699	147.735	145.922	174.809	168.893	144.237	173.56		23.1037	17.5423	15.2577	18.5017	11.9703	19.2794	39.3953	15.4733	29.2755	19.0616		177.814	116.143	164.311	155.619	89.6582	167.812	160.203	76.8469	106.84	79.5225
169.025	206.595	163.108	187.496	86.186	171.141	221.214	200.973	182.516	164.951		312.581	354.769	219.948	271.972	150.507	147.524	163.894	159.988	145.137	181.058		19.8085	17.6863	16.3895	19.173	12.6014	19.651	41.4557	24.9132	29.8559	16.9765		179.092	118.84	169.122	144.899	82.4135	176.22	160.495	73.0612	106.054	83.2082
165.212	203.249	173.207	183.998	85.4206	180.71	219.004	210.28	173.423	160.067		322.109	354.294	223.058	274.241	157.946	146.669	158.408	161.877	138.258	186.175		18.9459	16.7573	16.6424	20.5541	14.0987	19.5022	34.3306	39.5236	27.7281	17.398		180.296	119.011	166.331	148.159	94.9128	165.996	159.568	81.2549	112.356	83.3589
164.954	199.657	191.656	173.81	84.4807	190.059	209.098	215.372	169.234	169.844		329.924	339.906	219.378	277.842	155.207	144.98	153.519	162.574	138.899	197.698		20.1427	16.7285	18.2127	19.7069	15.4165	21.0706	33.1009	38.1851	27.9059	19.4813		186.909	111.197	171.078	147.368	94.0839	176.099	165.155	85.8118	115.292	85.0936
157.112	212.373	187.417	164.783	83.523	183.812	198.618	218.348	162.67	164.645		318.409	341.273	206.547	280.644	151.419	145.842	152.51	162.606	135.938	211.029		18.4826	17.3172	20.1468	20.3789	14.5956	21.7739	32.4243	35.7162	32.6628	19.652		191.332	102.928	166.366	139.844	92.5754	168.975	153.043	90.9855	122.423	86.3829
147.727	212.718	178.672	155.22	82.9472	180.735	195.679	228.692	166.045	162.036		313.753	345.42	207.563	276.644	163.794	127.579	151.514	166.038	131.825	214.22		19.9183	17.7734	21.795	19.1635	13.8197	22.8533	31.9161	30.3467	32.6628	19.4322		192.445	103.35	173.062	131.343	98.4474	163.752	155.248	94.1051	131.812	90.1553
150.81	215.104	163.847	150.984	76.9795	182.98	200.556	223.585	163.324	167.788		317.309	339.417	210.783	270.656	162.647	122.534	139.931	164.434	118.203	192.845		22.0279	17.6293	25.1994	20.5041	14.9738	23.4296	32.7901	34.0826	32.2069	19.666		186.976	108.491	182.432	127.95	105.529	158.03	160.541	101.02	128.34	88.9818
151.699	226.455	159.938	155.594	71.4853	185.159	197.502	225.42	157.742	167.508		313.905	349.506	219.898	266.524	158.66	118.471	148.605	174.883	114.109	211.92		19.0747	18.2319	27.2467	24.2315	15.3987	23.2983	33.2686	34.3965	30.0671	21.5343		184.007	118.639	184.521	131.593	115.183	149.615	162.848	99.9117	131.664	80.0467
158.959	221.112	141.858	164.713	67.3316	181.713	193.196	216.143	162.102	169.486		310.865	363.257	236.843	259.232	154.482	113.257	146.787	176.327	111.161	206.509		17.8333	18.2247	27.4832	23.4528	14.9829	21.8125	36.1289	42.5965	32.4566	18.8564		176.6	126.546	179.679	123.764	105.39	153.951	161.71	99.8042	130.936	75.0744
166.691	229.735	123.08	171.997	65.2081	179.198	180.873	214.485	156.238	166.241		306.15	375.176	250.176	251.074	150.675	98.6165	152.865	173.611	101.168	207.908		18.608	18.898	27.2089	23.3759	16.974	22.8159	37.4846	41.4865	31.4846	17.4102		177.798	123.084	177.064	132.223	98.7797	157.118	166.075	102.171	129.387	73.8134
157.669	231.853	106.743	164.906	63.3771	174.045	177.586	221.075	156.788	167.58		310.888	383.686	277.466	240.475	154.482	87.0882	174.135	179.691	133.017	202.71		19.081	19.3807	28.3943	22.4805	16.8773	23.0081	39.8341	44.6899	30.7189	16.8457		174.232	124.877	171.582	142.5	95.4557	151.357	171.117	110.121	131.032	70.4576
167.791	232.598	85.6522	168.318	65.9386	175.738	177.156	219.221	159.119	165.77		304.972	379.308	289.144	242.103	151.181	85.2602	178.377	183.534	135.451	194.466		19.3929	18.5676	30.2684	22.2014	15.1059	22.7668	43.3796	35.2739	32.8467	15.3854		172.87	122.223	170.036	138.756	83.327	157.97	179.725	108.637	136.852	73.7923
171.529	221.168	45.4826	175.671	66.267	172.482	178.875	222.81	155.768	153.865		309.099	373.191	307.005	234.565	151.197	79.3754	181.674	189.576	133.391	181.885		18.2104	17.4473	28.1448	22.1505	14.8774	22.1889	47.1132	34.8003	32.8467	13.0596		169.126	125.899	160.399	141.805	89.2866	146.65	178.647	107.806	135.285	72.3928
179.523	207.924	39.1084	178.581	63.3151	168.031	183.737	220.26	149.48	152.116		302.267	377.629	321.566	230.551	145.821	80.2299	180.561	194.067	139.23	172.503		20.6352	16.4643	25.9734	19.9221	15.7376	21.9236	45.6066	43.3738	29.1926	13.1748		158.42	137.342	166.009	141.87	81.9475	146.557	194.272	108.435	134.498	72.939
195.64	211.62	46.8322	181.727	68.3669	169.702	183.677	209.091	135.467	158.747		302.642	370.601	328.249	236.382	169.711	88.3031	177.114	190.356	145.624	169.809		17.8526	16.6493	24.6427	20.7595	15.6703	22.6963	49.4058	45.5668	32.9172	14.0604		152.551	132.14	159.703	148.697	76.3615	143.876	194.748	113.955	132.316	73.5292
197.209	211.742	59.2546	187.153	74.9388	169.642	181.722	208.287	129.695	154.792		308.795	360.304	325.389	234.103	208.549	92.6514	184.734	189.079	151.18	182.748		13.5443	17.7332	22.5663	20.2856	15.3375	22.2581	46.1001	46.4421	34.0161	14.3531		142.134	128.628	155.32	148.434	83.5653	142.867	195.525	112.802	137.271	72.2388
203.318	200.834	68.6471	193.297	78.4816	178.113	180.086	197.008	127.957	164.507		326.858	351.14	310.884	242.17	235.488	90.9102	174.373	184.193	156.176	156.374		13.227	17.5744	22.0509	18.6539	16.4578	21.2801	46.0421	48.099	36.156	11.644		149.274	123.33	154.385	150.708	91.1957	143.504	197.191	114.076	142.961	74.618
201.288	214.205	72.004	196.08	82.3321	179.909	183.165	201.911	120.431	167.105		322.645	349.646	295.906	243.3	271.706	100.175	176.62	188.994	153.822	154.013		14.2007	17.0918	23.1294	18.246	15.6954	21.8144	41.33	40.5389	37.3705	12.7793		144.631	115.441	166.136	157.208	99.9565	140.052	202.039	122.134	151.016	78.7378
196.632	208.532	84.056	203.41	92.7603	179.618	190.156	201.306	115.525	169.719		329.612	339.551	287.956	246.55	302.22	107.519	164.87	195.807	160.873	146.381		12.6781	16.336	24.3663	18.1385	13.8919	21.3935	40.0758	41.6488	35.7596	14.3831		135.539	119.753	170.945	155.922	105.665	140.18	199.268	126.139	157.26	75.7877
208.325	210.655	90.387	214.674	105.421	181.476	192.646	194.978	111.735	164.499		312.758	327.289	262.959	256.48	312.933	115.227	138.061	197.734	127.926	148.629		12.7449	16.3039	24.43	18.3655	14.7	21.3984	35.5843	37.9468	38.2185	14.6468		130.084	119.026	176.495	153.81	114.498	144.31	195.99	130.31	156.216	73.4716
204.661	213.373	100.449	214.291	109.643	177.257	197.582	198.599	119.025	162.392		316.926	321.462	243.574	254.453	324.509	113.883	138.615	200.608	127.566	148.95		13.0745	16.581	24.946	19.4267	18.1712	23.2421	32.9102	40.4527	36.8791	16.5156		126.124	114.843	183.911	160.112	119.509	142.37	185.413	130.13	154.165	69.9543
210.943	209.173	112.722	216.959	116.524	172.939	199.922	192.375	131.453	168.641		301.718	318.25	225.904	262.192	331.727	118.14	128.746	198.095	127.406	148.74		13.3864	15.1798	27.5915	20.0974	19.1221	22.9465	28.431	47.2957	34.0625	17.6164		124.605	122.997	191.812	164.507	113.834	145.752	176.295	128.592	155.598	71.73
215.142	207.983	129.734	215.061	113.417	173.977	198.491	198.07	137.834	173.845		279.333	304.825	225.849	259.216	342.335	127.504	123.237	210.711	118.195	151.564		12.3627	17.4395	26.7383	20.2173	20.0086	23.0921	32.6461	38.3989	34.5438	17.8826		126.716	117.616	189.162	167.735	116.185	151.442	166.925	129.99	152.698	71.8771
212.818	194.567	164.14	205.616	100.615	174.445	199.119	202.823	151.329	172.518		253.118	300.743	219.213	258.162	319.63	124.847	117.548	224.826	126.196	157.059		12.8179	17.134	28.5862	18.826	22.75	22.7893	31.9716	37.8144	32.3461	18.3194		122.853	123.968	195.686	161.308	108.896	149.121	158.263	128.845	153.8	71.7549
216.279	184.339	181.932	205.256	97.1582	179.078	191.287	199.741	156.214	182.863		229.789	305.298	226.249	266.015	283.631	126.019	107.781	231.839	123.592	165.186		14.639	18.2812	29.1244	18.4268	22.582	22.8922	29.585	39.9245	32.347	18.5037		124.048	113.063	199.282	159.685	89.0536	148.171	157.341	127.467	149.351	70.6023
224.235	184.683	189.164	205.741	97.6841	167.513	181.732	213.544	157.621	182.454		229.179	308.11	244.558	257.445	269.555	129.821	109.884	243.946	138.567	173.061		15.514	17.1966	32.6812	16.9786	21.5287	21.5463	26.6809	39.1008	32.4385	20.7653		106.533	113.202	202.33	159.273	75.7952	143.474	162.582	132.12	147.563	71.2535
221.965	180.042	194.702	205.753	99.1904	172.64	177.819	216.337	163.837	186.935		229.337	303.239	259.86	251.831	256.433	122.985	101.116	243.748	143.921	170.73		16.1284	16.1205	30.08	18.285	21.2197	22.3212	30.4991	43.7232	26.7836	20.2415		111.324	115.103	197.342	154.34	69.9624	143.369	158.647	129.441	139.072	69.0679
229.306	183.283	186.483	203.679	107.152	175.69	175.248	221.039	168.202	189.481		222.23	299.267	268.259	250.172	245.522	123.95	100.275	244.981	142.364	169.492		15.815	15.7467	31.3758	16.7249	22.1976	24.9404	28.2895	42.5487	29.7594	19.3003		115.035	116.362	191.039	156.368	60.9728	142.306	154.667	132.169	138.498	69.5809
226.421	189.749	183.808	196.407	105.46	172.35	170.564	228.251	172.148	194.92		222.208	302.675	283.684	246.521	240.208	122.734	103.329	245.834	143.133	161.43		14.7248	15.7095	31.2654	16.3567	21.6042	27.1293	28.3767	46.0051	27.571	19.5106		111.973	113.491	189.81	161.482	57.5616	137.356	150.301	133.148	139.141	72.0172
231.229	188.904	169.76	194.948	108.629	175.387	166.45	223.241	172.912	203.948		221.297	310.585	293.671	239.981	235.363	124.369	93.8568	242.694	144.846	176.216		15.5542	17.0099	30.333	15.4718	20.4798	27.6223	28.508	46.2972	31.3321	18.0107		108.321	107.614	185.028	161.213	47.0293	141.431	150.078	134.513	134.341	73.204
234.486	195.99	158.931	194.597	101.336	181.227	162.052	236.608	164.722	201.842		232.557	311.068	299.564	235.658	245.099	125.815	107.037	242.993	150.69	185.9		15.1787	17.3758	29.5887	15.8309	21.587	27.4105	30.2202	39.6802	35.5068	17.7315		104.122	99.689	191.858	158.126	41.6598	138.849	152.127	144.649	137.403	72.8508
237.396	200.473	141.756	209.281	101.609	184.349	163.512	235.517	166.362	201.713		271.991	307.053	300.773	240.101	248.516	115.966	100.776	229.752	161.323	192.771		16.1149	15.3805	30.2859	16.2383	24.332	27.3027	24.7434	45.2084	36.9076	16.8046		104.974	102.433	201.531	154.57	43.4449	137.669	148.019	144.637	136.898	72.2768
237.724	212.154	99.3106	224.93	113.762	181.324	153.167	236.467	162.768	198.865		300.157	314.928	298.046	240.846	244.094	109.582	110.222	221.183	151.506	195.491		15.4935	16.4571	28.7914	14.8744	26.5184	27.5783	22.1976	50.4211	36.7801	15.7896		107.445	109.88	193.428	155.683	48.8983	140.653	155.338	153.333	129.397	72.6822
236.515	214.874	73.7056	224.517	113.762	178.582	155.353	246.278	162.359	193.311		318.705	307.939	297.89	228.499	248.808	106.231	116.24	230.838	162.543	190.023		13.6439	15.9418	29.9405	14.1486	27.6579	29.7033	22.6107	48.5591	36.542	14.9094		109.369	124.728	189.848	159.972	58.9107	140.563	150.519	158.299	126.097	74.8988
227.7	210.233	52.0491	221.426	112.838	187.768	166.447	242.954	163.147	184.815		307.976	299.716	287.831	230.611	240.386	106.28	114.664	229.017	149.88	191.483		13.6249	18.3095	26.0041	14.0889	28.6616	31.5377	23.1374	53.1948	36.2661	12.2026		110.51	120.687	187.165	165.295	83.2197	148.384	156.141	170.728	125.144	78.3984
232.821	201.398	38.3935	220.339	108.909	185.664	164.163	243.291	164.262	164.162		302.837	300.844	275.183	234.909	227.154	103.369	130.288	226.277	152.14	203.388		13.1277	19.2302	27.0658	13.4711	29.921	30.3617	22.2661	53.6798	41.5965	15.2005		108.617	126.554	186.841	175.416	87.8788	147.047	164.056	175.364	127.082	78.5613
235.022	198.643	34.4607	222.485	96.7683	188.379	162.434	239.907	173.509	155.338		315.937	297.081	255.851	233.55	218.964	105.586	126.213	224.529	182.615	205.681		15.277	19.2965	24.6726	14.0862	30.6359	27.7115	24.8461	58.7516	42.8023	15.8942		106.455	123.325	185.963	184.816	98.2246	145.653	168.267	171.379	122.074	80.6267
236.89	193.439	31.4056	226.055	89.1839	196.993	167.865	233.714	173.36	144.272		323.093	304.007	247.535	239.702	215.913	105.167	132.857	221.702	187.459	220.473		15.5677	19.7461	24.8057	13.3616	29.2071	27.5445	26.5997	61.3937	39.8384	17.472		110.262	126.04	190.414	187.842	101.166	142.718	174.555	167.965	117.957	81.4398
226.019	193.894	32.3972	228.779	75.129	189.826	170.878	239.952	172.395	142.089		313.006	294.212	249.502	250.003	213.872	98.913	155.384	223.765	191.036	212.149		13.4739	19.2396	26.1039	13.2572	30.4248	27.2136	29.794	65.8905	30.8475	18.8674		112.102	138.805	191.804	191.008	109.041	137.836	180.601	164.405	118.379	80.6616
223.93	192.747	40.088	227.059	71.4338	191.718	178.171	231.538	177.521	147.413		308.33	299.567	242.422	253.735	195.201	104.453	157.344	224.393	195.807	198.31		17.1317	18.506	26.3614	13.4286	29.14	26.8484	30.0572	68.2189	20.8829	17.3455		113.765	140.153	184.373	191.78	112.475	141.576	184.173	150.51	117.465	80.6044
229.32	189.297	41.1595	215.624	74.2471	193.653	177.732	234.425	176.895	141.349		295.615	304.16	243.651	249.847	184.397	106.632	181.144	222.862	198.647	193.337		16.1631	17.9388	27.2076	13.2794	28.7587	26.4419	32.836	70.7924	13.7664	16.787		105.189	131.999	177.462	196.932	116.727	137.626	187.409	147.049	115.838	81.6736
234.235	183.924	52.4629	207.916	67.0429	202.177	192.692	236.758	185.35	145.367		289.177	306.148	260.962	252.294	182.671	111.002	187.63	230.152	201.977	182.123		16.1272	17.1438	27.3319	13.1271	28.7893	26.2361	32.984	63.9712	4.0571	16.55		94.7894	120.663	178.029	205.915	114.046	137.868	188.897	130.857	119.267	78.1565
244.383	180.618	57.4276	203.172	68.4641	207.152	199.921	231.663	196.092	145.08		291.921	320.166	268.736	259.819	183.908	114.926	197.22	221.54	197.3	183.374		19.5508	17.5584	27.6197	13.6106	25.8113	24.289	34.5166	62.5183	5.89147	16.8563		94.5147	117.074	174.357	209.856	109.685	137.521	188.565	128.806	122.613	79.0628
249.086	179.231	65.9934	199.977	67.4393	204.222	201.254	237.421	200.463	146.417		283.945	334.574	280.52	252.819	172.526	119.664	200.491	222.789	192.093	180.127		19.6473	16.1421	27.4067	14.673	24.6246	21.6028	37.7187	54.0646	12.9495	16.6758		92.7794	134.907	177.459	210.057	93.4029	131.933	176.704	113.742	120.747	72.5814
251.63	177.188	72.0438	199.449	76.8797	208.479	214.328	234.615	209.327	164.188		293.683	336.451	290.761	250.743	167.694	121.863	190.338	225.067	187.484	178.422		22.4422	15.8503	26.3553	15.4573	24.4457	22.5252	43.3819	58.1602	20.745	12.5041		86.7721	130.875	171.959	199.716	93.7849	124.522	173.118	108.072	119.21	72.2983
258.213	174.128	80.3667	200.675	83.8895	211.313	214.843	235.324	205.354	171.011		280.338	334.844	305.663	255.201	165.015	121.3	201.123	218.389	157.414	183.261		21.4139	15.1804	26.0207	15.3284	26.9408	22.5587	41.4577	52.3799	28.3173	13.6365		79.5165	139.48	168.944	190.303	90.5794	117.868	166.183	113.585	121.782	77.8237
264.416	161.609	88.2499	193.695	88.681	204.602	215.368	243.48	212.599	184.848		280.1	326.744	315.865	246.337	157.632	131.012	197.8	223.852	149.566	171.645		23.3824	15.817	25.5433	14.2584	32.3344	22.2825	37.8401	54.616	34.801	12.7677		74.8581	138.785	169.785	180.774	92.3757	126.2	155.631	114.405	124.699	81.8064
277.438	153.283	96.6026	192.983	99.5693	217.483	213.753	239.741	214.724	179.622		284.249	337.055	314.992	237.844	156.177	144.075	184.062	220.135	148.931	179.07		23.2544	15.9358	24.4115	13.075	29.3821	23.268	34.9877	48.0978	38.4477	11.7774		71.9847	133.83	177.879	169.794	102.206	128.117	149.847	118.842	124.377	79.7169
277.291	156.455	93.8011	195.816	99.9871	218.814	204.258	243.334	216.664	178.104		281.428	332.224	319.35	227.093	150.815	144.261	176.17	228.575	135.191	196.28		21.2479	16.6704	24.0511	13.1361	29.7962	23.783	33.9022	49.1189	34.8743	14.0869		61.0837	134.39	182.044	168.007	110.789	128.902	140.172	120.675	125.721	84.9583
279.535	152.175	92.3514	192.969	99.024	229.837	201.743	242.204	225.375	189.902		281.077	324.209	311.027	232.381	156.307	153.843	162.289	223.916	140.385	195.668		24.4891	16.8221	22.1171	13.6464	31.4135	23.6397	32.576	43.9739	40.0917	16.2847		62.3569	142.179	187.124	162.303	114.967	139.995	148.131	117.576	129.275	83.4772
284.018	156.415	89.6659	195.125	99.7642	233.608	197.524	238.125	222.875	191.595		278.786	311.744	299.879	230.523	170.673	154.862	158.024	223.149	129.073	208.106		24.6894	16.9495	20.683	14.0929	27.5182	25.9051	33.9572	41.3603	40.2824	18.4831		59.7906	151.354	192.185	155.313	121.774	130.752	140.79	118.2	129.439	87.3268
276.278	169.329	91.5754	206.004	102.735	230.804	200.251	240.37	221.713	196.199		265.661	302.137	289.647	244.368	160.828	154.79	152.906	222.199	130.166	214.731		22.6583	16.5991	19.2522	14.183	30.0699	29.2326	36.8976	40.7827	37.1516	17.7968		57.9766	149.552	201.309	150.246	126.179	127.17	144.08	110.299	135.151	85.3102
275.935	189.169	93.8726	211.896	105.981	235.388	198.779	231.398	224.819	198.886		282.015	284.455	273.716	259.422	178.977	150.938	151.415	214.751	130.178	228.5		20.8471	17.3214	20.1887	14.3776	28.8531	30.28	33.5134	43.0762	39.2038	17.9058		59.6838	139.52	197.981	141.956	126.508	125.956	147.365	105.679	136.788	88.0691
277.589	199.815	98.1012	217.093	102.204	235.185	186.884	236.41	223.7	199.986		273.318	274.202	266.749	270.903	174.295	162.97	151.546	213.291	130.128	233.864		20.2438	17.9259	20.9473	14.7526	27.7608	28.9028	27.8466	42.6667	42.3128	21.4134		58.3233	142.488	202.202	149.472	138.796	133.733	144.549	111.141	136.626	89.2042
272.713	204.493	95.1741	214.093	97.4329	238.258	186.413	234.964	232.762	202.968		273.178	271.156	241.192	273.661	173.552	169.57	142.813	224.417	145.224	230.535		22.5946	18.8421	19.3732	15.1086	25.8281	30.5684	29.7708	44.5497	45.0255	21.3684		61.3266	139.218	213.089	147.713	139.42	137.049	149.81	99.5703	132.089	88.3
267.218	211.611	95.9194	222.601	101.427	241.451	184.029	226.533	234.561	198.166		268.373	268.323	223.171	281.436	177.017	165.44	138.224	221.467	147.83	238.376		21.5794	17.8977	19.5469	14.9185	22.1614	28.5069	35.9002	36.5938	42.1568	21.1369		55.8888	143.783	209.811	152.712	142.132	137.43	153.554	93.2168	126.562	85.1129
260.407	225.255	111.934	225.778	100.214	235.916	184.711	226.143	239.763	196.387		262.34	266.943	221.243	292.142	173.243	158.652	135.537	225.378	148.838	231.534		22.8172	19.1016	19.917	16.0838	22.044	28.2645	40.5038	37.4557	38.9427	20.6861		52.1036	146.262	208.259	160.167	133.427	144.193	154.575	87.1435	127.976	89.203
265.752	222.106	127.899	226.067	103.986	239.073	187.618	218.098	246.899	189.723		273.012	261.233	227.407	309.1	188.816	156.896	131.298	211.839	156.064	223.327		23.167	20.0538	20.2953	17.2027	20.109	28.7373	41.9769	34.2363	42.8624	18.6474		53.7269	142.928	205.949	154.896	126.385	138.334	157.405	88.1233	127.695	84.2764
258.755	229.578	139.703	231.87	108.924	232.052	184.36	216.22	243.447	177.946		270.942	262.725	243.65	311.086	182.204	149.703	140.837	218.614	147.219	231.673		21.9329	18.7542	21.2012	16.0524	16.059	30.1579	41.8845	34.0719	39.4125	16.7513		52.09	147.33	207.552	161.394	120.004	136.144	151.356	98.8649	129.932	84.0301
257.399	233.662	144.835	239.001	114.59	226.877	190.433	212.741	253.4	175.476		271.305	266.844	252.781	316.208	166.071	152.533	131.601	215.502	159.63	230.791		24.358	19.6212	20.785	15.7474	17.7302	28.0369	40.3432	34.8564	37.5406	14.9775		58.4987	145.6	204.302	164.847	116.455	141.007	156.803	101.673	131.508	85.5306
260.493	232.419	152.918	241.847	116.674	227.486	188.911	205.325	257.652	174.091		270.421	270.815	257.957	311.15	172.695	151.238	138.281	212.622	156.946	226.604		23.568	19.9922	20.7526	14.5114	16.4394	25.4117	34.5564	36.991	38.3537	16.203		53.9126	143.822	194.571	167.53	117.854	146.313	161.037	107.996	126.842	88.0837
268.874	220.774	158.308	243.486	126.363	228.391	186.099	209.094	260.465	175.844		249.9	282.988	275.703	320.82	168.509	148.525	138.935	220.661	149.089	215.629		23.8546	19.3511	21.3378	14.8206	17.7442	25.2213	34.6611	36.3322	37.3723	16.5283		52.3497	139.794	199.685	177.537	114.078	152.849	162.719	115.061	127.729	87.3313
273.95	220.948	165.526	240.151	132.764	233.454	196.501	202.994	262.989	177.805		256.91	290.962	282.533	316.781	190.88	143.032	140.936	214.742	152.9	210.382		21.7347	18.1789	21.9727	15.8018	20.3777	24.7767	35.6644	31.348	37.1088	14.9988		53.0799	143.491	201.701	173.677	100.053	145.633	179.84	103.467	128.629	87.4677
274.102	226.194	180.07	243.717	133.259	237.883	200.98	203.886	257.792	174.343		260.808	304.49	313.933	318.331	187.522	143.769	149.644	206.842	140.423	219.221		19.2203	17.3083	22.3484	16.6864	18.722	23.8749	38.5557	31.348	35.0061	12.7906		47.0354	145.197	201.16	181.228	94.2721	145.306	177.692	107.722	131.917	83.7092
271.776	225.37	187.376	242.072	131.361	241.589	205.218	204.372	257.983	178.418		260.153	312.264	326.617	318.912	185.657	145.728	170.491	200.499	158.59	217.528		20.2931	17.0426	21.8047	17.5419	18.9552	25.2896	32.4425	33.8473	34.5432	12.7151		54.7376	143.379	209.165	185.095	80.8077	143.523	180.926	114.597	136.22	88.5187
271.224	218.601	177.296	240.876	133.664	247.286	211.829	200.834	250.405	189.478		266.329	309.751	323.014	314.076	191.204	145.089	174.547	195.212	164.311	223.321		23.6436	16.5617	21.4651	17.7309	18.6081	25.0438	28.3393	39.9377	39.6442	15.782		50.1376	145.66	210.553	184.168	68.8151	138.958	184.856	117.716	130.59	89.6539
259.794	218.336	178.12	235.533	136.461	247.451	210.375	203.105	243.907	191.799		263.202	314.085	318.211	309.973	179.689	144.178	177.956	196.017	164.638	225.129		22.5242	16.4477	20.9999	17.7567	18.916	23.8922	32.0563	42.4962	37.6732	16.148		51.3301	150.834	210.149	189.199	70.0944	138.28	187.311	124.116	134.451	92.1563
253.139	219.766	176.963	238.474	140.139	248.645	217.165	200.487	248.619	199.141		273.477	312.161	296.677	306.58	181.469	148.286	164.548	198.979	169.109	218.403		20.926	17.3523	20.4043	18.565	18.6773	23.1216	32.6449	41.0124	38.9696	18.628		53.1007	146.049	203.01	183.689	68.7675	123.872	190.739	120.477	129.414	94.7309
239.274	218.556	182.939	232.089	144.554	250.334	220.444	204.47	239.2	208.893		260.322	310.227	282.759	301.533	179.238	149.638	167.2	203.383	160.196	221.708		19.6778	16.8952	22.9302	18.5077	16.6048	23.1676	33.1801	45.0502	39.2306	17.2663		52.5577	148.172	199.91	182.731	65.6837	125.802	194.114	130.324	127.72	89.3289
230.015	211.522	185.331	223.73	146.462	253.269	222.17	205.703	224.366	213.308		284.339	303.832	266.565	296.985	175.27	152.565	157.225	218.952	153.982	223.007		20.0647	16.7146	21.975	18.9862	16.2677	23.6624	34.3082	43.5889	36.817	16.9965		53.4026	150.848	198.967	177.81	67.2544	124.768	194.179	127.776	128.152	91.6676
220.373	217.88	188.743	224.373	143.145	254.184	223.16	197.651	211.684	221.255		293.651	296.574	250.382	279.595	174.266	158.059	148.62	213.135	155.392	231.136		21.82	17.9513	18.4606	18.8582	15.3822	24.7302	35.5001	41.2262	37.3186	18.2057		55.0309	149.848	196.506	161.476	64.6232	123.294	190.57	126.276	125.313	93.1486
211.043	208.291	187.045	228.874	140.274	245.091	215.44	202.606	199.878	219.733		289.782	290.319	239.437	276.688	156.998	158.222	140.105	227.337	143.816	238.027		21.8124	18.8408	18.4552	18.5414	14.2689	24.2881	34.5005	39.5765	37.7772	17.5898		60.7965	150.747	197.154	160.927	83.4017	136.237	170.037	131.24	125.965	92.56
210.882	209.847	186.342	217.548	142.738	236.219	215.266	205.98	189.652	228.327		291.945	280.386	230.047	273.663	164.997	166.766	128.542	222.91	141.255	238.489		22.1345	19.4935	18.4687	18.118	15.3554	23.9915	32.6854	41.417	36.3183	20.3818		68.7721	150.413	190.966	149.916	92.2065	141.707	168.906	131.904	123.338	94.623
209.056	225.629	181.987	212.618	141.81	238.493	213.242	203.826	180.547	226.111		294.324	274.443	228.818	272.74	167.974	164.827	109.981	229.492	123.804	247.051		20.6139	18.498	16.5437	18.4754	15.2031	24.5093	37.0673	39.0093	40.447	20.1086		67.1774	157.286	185.71	144.064	106.922	131.126	169.51	127.422	124.745	88.9182
207.466	250.792	183.974	202.168	134.785	230.175	211.106	209.359	176.698	221.447		294.813	267.937	230.983	274.012	164.752	162.258	102.776	238.992	114.871	245.37		16.2572	17.9005	17.231	18.1992	15.4892	24.7222	40.1304	38.6468	33.8447	16.5165		72.796	154.056	173.514	139.003	117.871	128.293	165.833	132.021	126.892	86.0923
213.797	258.606	175.683	199.103	131.982	226.378	222.672	210.081	174.674	224.844		296.676	265.428	230.48	274.174	171.304	156.061	98.1158	245.955	113.133	249.176		14.4672	19.2942	18.109	17.4263	17.9621	24.1681	36.223	39.1536	33.9521	18.6027		68.9402	150.246	165.913	135.217	120.277	120.33	167.558	130.683	118.959	86.6392
204.075	254.16	177.193	190.141	131.838	220.232	223.979	215.582	172.894	223.496		292.051	270.111	245.101	274.201	170.282	148.116	98.6201	247.106	98.9235	255.093		14.6056	20.4916	17.9228	17.5708	18.2181	23.5295	40.1425	41.5921	30.6502	15.7654		66.3222	157.115	168.394	136.271	122.701	136.565	164.229	130.513	124.501	87.9391
205.097	253.72	176.276	191.511	133.001	214.416	214.523	210.499	172.942	214.237		317.212	269.722	268.688	272.961	182.346	143.532	94.547	244.861	112.753	253.856		16.9331	20.0576	17.3187	18.7594	21.5965	25.3066	40.4581	36.7294	31.3235	18.7478		73.8057	149.683	164.129	131.599	124.014	137.414	166.387	122.398	127.984	96.021
205.621	253.638	177.657	187.876	137.05	213.166	208.445	203.449	180.189	201.89		309.199	273.057	301.114	263.642	179.29	149.526	92.3629	232.074	111.638	257.698		16.6386	20.2798	16.3717	18.3451	20.8434	25.0761	45.5519	36.542	31.0114	20.2643		79.6099	153.413	165.389	136.919	112.75	143.502	155.317	125.217	128.619	91.3775
195.128	244.657	179.034	179.697	137.545	204.461	208.137	211.029	181.257	190.112		309.473	276.05	309.693	266.495	176.11	157.358	99.4171	227.899	124.239	248.127		14.3964	20.0018	17.4666	17.7246	20.8632	25.0761	45.3047	37.9451	28.6443	20.6203		85.8526	154.974	164.86	145.22	110.153	149.706	151.291	127.033	131.388	92.2366
190.327	262.369	182.954	174.386	139.104	205.785	217.907	208.757	185.278	187.05		312.868	274.394	313.391	269.047	182.389	160.78	101.625	216.891	143.83	243.752		15.2736	20.6708	17.2166	16.9706	20.047	24.708	45.3047	39.9961	28.3245	22.4054		89.758	146.833	155.185	141.898	85.4711	144.181	159.274	127.925	127.937	92.8882
173.62	272.586	186.353	173.589	144.694	207.227	219.733	209.597	193.571	181.28		304.739	277.452	317.919	272.434	182.78	157.338	109.734	221	148.43	227.839		15.5666	19.8645	17.5961	16.2277	20.6349	24.0836	44.8901	36.0012	30.615	19.2767		89.632	145.699	159.918	155.37	74.0873	152.511	153.225	128.754	130.711	93.6201
156.204	266.975	194.479	169.034	154.779	199.097	218.725	216.544	193.571	183.321		309.039	269.764	317	277.388	175.943	164.253	106.728	222.13	143.712	209.856		15.072	20.5499	17.9343	15.6367	20.4969	22.3581	41.9903	38.4088	31.2668	18.9284		91.9072	136.036	156.911	160.44	54.4077	156.377	151.902	123.68	130.721	98.032
140.105	247.585	199.501	165.804	168.8	202.387	211.501	213.843	197.995	185.379		303.06	275.406	312.67	273.847	172.811	169.979	117.582	215.613	151.417	208.72		15.1065	20.4332	17.134	14.682	20.6419	20.0055	39.5568	34.9933	32.7681	20.7998		93.9514	148.255	161.941	165.786	37.6324	156.971	147.486	120.392	130.225	98.5976
115.554	244.487	208.046	161.668	183.971	205.235	208.221	222.148	195.015	183.852		297.93	280.599	307.33	269.642	168.444	182.449	125.332	213.195	145.365	199.506		15.2121	19.8128	16.5226	13.3343	16.7703	19.2665	44.1125	31.1182	34.335	19.5037		100.153	152.241	160.344	171.786	20.836	187.149	148.02	120.67	132.397	97.1389
110.938	248.581	211.624	162.656	193.002	210.904	212.144	222.491	188.198	180.494		313.003	272.54	286.418	271.785	185.688	188.146	119.124	205.3	155.317	196.766		16.3446	19.5757	18.7741	13.4229	14.7165	18.2472	41.2596	33.085	39.07	19.403		104.277	145.611	152.79	173.322	10.0018	184.231	156.2	127.149	124.065	93.5839
98.7968	244.909	214.056	162.848	197.731	216.796	222.686	232.523	191.754	174.434		307.116	275.666	261.529	276.99	181.07	194.721	142.288	204.028	146.557	190.807		14.6619	18.4134	20.2663	13.8536	12.8007	16.7195	40.4088	37.3482	35.4863	17.9932		94.5565	151.725	160.442	184.409	1.19902	188.013	152.352	139.582	121.958	90.5992
81.6584	240.135	214.454	165.556	205.498	214.953	222.657	250.693	191.992	180.155		304.534	273.906	234.394	280.937	191.993	188.324	144.198	201.679	146.696	179.76		17.8708	16.5129	19.2656	13.1689	15.4861	17.2861	38.0898	37.5356	35.2498	16.4477		89.6267	153.583	157.766	179.857	6.21455	182.232	158.58	140.277	123.046	93.3927
74.5199	238.639	212.884	164.544	213.728	223.142	222.618	254.218	200.395	182.686		311.736	273.547	229.783	277.866	195.007	181.62	143.508	205.898	141.351	188.875		20.9807	16.3339	20.3497	12.5384	16.9833	16.7278	38.0898	42.0127	36.3187	16.9272		81.8308	152.015	153.226	180.48	13.8781	179.539	156.953	146.943	119.88	92.2264
69.1687	222.019	210.363	170.324	222.676	226.023	213.137	267.928	194.995	181.367		310.752	271.802	229.038	282.827	188.046	177.515	146.237	228.068	130.804	191.223		19.097	16.7471	20.5881	12.8776	20.9138	18.2754	39.7318	40.0119	35.085	17.6157		76.8208	155.748	156.803	182.233	20.1503	180.502	152.712	148.476	122.894	93.2716
68.3035	203.343	208.391	179.787	229.06	226.483	212.935	273.035	185.896	182.8		314.76	266.745	232.841	283.389	180.063	173.685	141.658	241.252	132.642	205.952		21.2356	18.4164	20.6358	13.1396	22.7501	18.5229	37.4309	46.0137	32.6652	21.4716		77.8926	150.974	142.165	170.627	24.8659	164.984	150.828	151.173	124.22	91.5748
69.2624	193.166	199.914	190.683	235.597	225.637	210.713	278.863	186.086	177.444		302.456	269.825	223.894	274.838	180.905	171.266	145.315	251.048	143.52	219.021		25.0679	17.6426	20.1333	13.0095	22.31	18.2095	41.3364	46.7259	30.6412	21.1213		79.2608	158.042	140.812	161.419	26.4164	163.962	142.246	165.587	123.492	89.0896
71.3012	185.512	195.536	202.148	240.296	225.405	210.44	290.625	174.123	181.302		305.678	265.272	224.012	278.219	185.559	174.881	138.735	255.191	138.803	215.097		26.2092	17.7194	19.4447	12.4659	24.3979	18.7317	39.0245	42.6115	29.3516	21.7404		84.1587	147.42	134.414	153.497	26.5288	166.21	139.878	170.122	124.99	91.7291
81.851	189.675	191.079	209.601	242.333	221.04	208.687	287.338	169.675	183.392		277.153	270.913	223.558	275.555	194.528	170.71	133.667	252.911	148.863	221.333		26.0731	18.2336	19.905	12.2731	26.2232	18.7832	35.544	51.1469	27.9723	22.1869		86.6995	144.385	148.244	149.43	24.5927	141.803	131.944	180.903	124.547	92.5675
81.315	191.645	186.593	213.793	242.016	216.039	203.252	286.616	169.956	186.983		249.65	277.004	230.563	266.572	177.329	170.979	148.214	265.118	155.361	226.843		23.848	19.6101	18.761	12.4242	26.2195	19.8559	34.2366	45.3122	26.1571	22.2523		90.8034	151.643	148.776	151.957	30.2352	137.831	124.421	181.278	132.249	96.5191
84.3612	188.517	184.47	211.279	245.699	212.287	196.586	285.249	163.423	192.203		217.377	274.336	268.099	251.365	184.023	165.661	132.886	268.73	160.632	225.935		24.5292	20.9812	18.6983	12.6733	25.8695	18.972	33.851	45.415	29.1795	23.3449		103.356	147.512	140.118	135.883	30.128	131.631	124.363	176.504	135.682	91.4408
93.1226	181.721	179.204	206.338	234.242	212.349	197.205	283.151	164.822	189.033		197.311	275.415	284.622	244.774	185.167	162.19	132.563	268.43	167.263	235.319		24.8521	22.869	18.82	13.0227	23.7465	18.8052	35.7833	43.9724	30.5116	22.0621		101.905	143.822	142.414	132.549	29.2017	131.988	124.958	175.458	137.094	91.5934
98.6083	180.355	182.142	205.25	231.743	205.479	191.172	288.013	154.091	189.661		162.539	275.018	290.226	262.329	188.661	165.59	132.53	265.295	165.661	230.652		23.5645	24.1318	16.7988	12.8895	21.9506	17.9899	33.7184	38.8619	28.8397	19.655		108.833	142.91	147.639	128.569	31.0441	124.745	124.392	173.992	142.97	90.0394
106.797	187.76	184.769	199.599	227.622	205.222	191.89	280.539	158.532	189.589		131.082	276.945	291.783	258.681	201.682	170.327	128.999	245.283	162.718	225.886		24.215	24.3795	16.6166	12.6114	17.8636	17.2393	32.0764	37.1884	32.8428	19.1275		102.694	131.697	149.817	127.621	35.5834	126.085	125.023	176.458	144.052	90.3445
115.255	182.399	187.397	196.69	229.192	195.694	183.661	279.909	168.24	181.94		106.166	289.885	283.946	259.32	207.086	174.337	133.426	231.187	157.009	225.798		21.2928	23.8743	16.8787	12.2875	13.906	17.8722	36.3864	31.2531	34.3065	15.1704		98.9697	133.681	159.264	138.267	34.0767	143.248	129.222	168.016	141.002	87.6326
133.841	179.908	196.222	195.176	225.589	198.965	187.815	272.643	162.116	184.849		80.0881	293.4	289.652	259.179	214.165	181.194	132.405	212.371	151.213	220.432		19.923	24.4271	19.524	13.7561	16.3857	20.3817	38.3785	30.1183	31.1396	15.4681		90.5764	126.009	155.748	143.473	37.1572	145.974	133.943	153.199	142.367	84.7551
145.347	175.998	197.657	195.781	224.099	199.838	186.414	264.513	171.798	171.616		55.9486	304.004	281.967	254.365	214.543	185.192	132.468	206.432	149.087	227.274		20.8665	22.8862	20.5946	13.878	16.2763	21.9339	41.76	37.7448	36.1179	14.5377		82.162	125.611	157.385	153.413	36.4692	139.734	133.957	144.042	140.298	87.5812
150.79	163.026	197.034	197.817	221.263	193.039	188.29	263.353	171.928	162.604		58.6177	299.817	276.037	259.178	211.186	192.293	136.758	205.188	145.36	221.619		21.9543	21.6987	20.2835	13.779	16.9841	24.3269	40.4877	30.0764	24.4538	12.7068		78.076	118.569	145.347	164.97	36.5802	144.585	132.981	129.842	139.549	82.7332
176.837	156.16	198.961	199.884	223.385	195.748	190.936	260.201	171.27	157.574		40.2349	305.732	277.062	266.253	219.688	193.108	123.59	189.551	136.935	219.694		21.7977	21.3519	20.3693	12.6221	17.8162	23.9432	43.8084	33.2879	16.5377	14.064		69.8022	116.124	157.326	162.474	33.1959	136.416	129.434	117.804	132.047	81.8655
187.185	157.545	194.032	204.801	223.457	195.196	187.641	267.092	171.535	152.732		56.4528	307.241	240.145	275.558	207.497	198.374	120.364	183.23	134.172	228.79		21.5945	22.788	21.5985	11.4354	17.0613	24.5424	44.1941	34.339	11.8414	11.3879		56.6099	115.953	158.24	178.689	32.4007	143.547	129.097	114.797	123.385	84.5491
193.994	170.752	191.502	209.31	234.178	196.145	188.583	267.041	164.374	159.465		73.0959	300.014	220.014	283.111	205.826	208.965	115.1	179.74	125.249	228.325		20.9844	22.6188	23.0038	11.6183	16.9357	24.2318	42.433	34.3499	6.72414	11.5118		55.537	114.726	151.207	185.72	28.9814	141.311	130.04	113.166	116.455	87.0069
200.289	172.048	189.71	205.139	244.361	202.069	194.197	264.973	169.306	160.112		93.0854	298.405	204.076	263.152	220.809	209.694	109.915	183.529	134.109	242.675		22.2556	19.8119	22.9877	11.0132	18.0148	25.3641	45.0028	34.6499	0.0806182	11.1528		42.385	120.721	138.665	191.008	21.2637	148.556	134.957	106.975	109.68	91.4258
198.229	165.096	191.539	197.682	259.782	196.42	194.539	269.026	168.109	158.482		122.509	297.83	202.171	264.802	213.683	211.811	112.971	187.562	126.186	248.201		22.9126	19.1108	23.6967	10.8492	17.0412	26.5008	50.9127	35.0367	9.03242	8.48437		51.0394	128.313	132.43	197.979	9.24146	144.893	134.522	97.0889	101.982	89.5343
207.409	172.915	190.768	192.732	263.683	201.82	205.202	269.093	165.037	158.68		146.586	283.537	197.801	258.778	214.987	206.976	110.617	183.983	143.644	246.535		21.794	19.4607	24.3216	12.3499	18.5762	26	49.3668	35.4397	16.3326	8.86286		49.1292	127.75	130.967	191.714	5.55059	125.842	135.79	96.2518	97.61	89.323
185.379	169.745	179.437	182.254	271.693	194.056	201.913	272.395	170.633	154.886		164.27	285.787	198.046	257.969	213.146	197.841	107.379	188.01	152.863	262.088		23.2346	20.9716	22.078	12.664	19.1723	26.4194	43.8293	39.4839	24.342	10.1638		46.1387	125.113	144.084	190.913	13.632	123.92	131.677	104.172	96.2856	95.0428
173.179	167.855	180.387	169.248	285.207	198.795	207.74	273.001	166.304	160.391		167.336	276.52	216.192	255.64	213.712	194.399	112.388	183.64	160.159	270.884		25.4265	20.9098	22.5169	13.4222	18.9728	25.6703	46.8055	34.3051	34.7872	10.2659		44.3481	123.857	148.173	189.328	22.3358	125.765	139.505	106.649	95.4091	94.6982
165.895	173.85	183.006	170.985	290.512	203.979	200.671	276.296	170.982	159.404		174.677	272.827	223.014	247.691	212.962	189.306	109.693	178.008	156.386	283.13		26.9158	19.7903	22.6983	12.5398	16.3289	23.2318	46.8055	36.8064	32.3508	12.0429		40.787	132.71	157.281	176.121	27.7342	135.09	145.099	108.762	91.7807	101.121
151.076	167.495	178.843	165.148	289.059	200.802	195.328	279.509	171.139	151.632		202.57	267.855	215.75	239.08	200.701	187.834	114.749	182.842	153.134	275.743		28.9319	18.8928	22.3086	12.5286	16.5556	24.0206	48.3002	32.97	31.0557	11.7094		44.0712	123.283	153.855	176.979	37.4	144.017	151.962	112.49	89.9612	95.717
156.575	167.935	188.09	159.517	282.684	201.165	189.582	275.127	163.186	156.655		223.857	255.041	226.936	243.459	212.594	188.61	111.962	183.575	150.698	271.001		26.4994	18.024	19.7361	14.8598	17.4449	23.2589	52.5333	31.7501	33.9856	14.7286		51.0183	127.028	161.531	168.885	46.6256	138.586	158.122	112.223	88.2037	95.7094
149.165	155.36	190.72	159.165	271.462	197.981	180.629	267.913	164.873	150.937		220.366	248.979	244.377	251.61	211.304	179.474	119.289	188.146	157.538	267.118		24.6177	17.2559	18.6183	16.0639	18.824	25.9461	51.0865	32.2113	35.1466	14.9156		55.8311	126.722	173.04	166.77	50.0928	137.042	158.845	120.341	85.0072	94.3424
137.843	146.135	189.281	164.818	261.333	193.908	174.143	263.952	167.947	149.176		221.227	240.276	267.175	278.256	192.536	171.039	133.917	180.838	152.512	245.439		19.0976	17.3902	16.9344	17.5441	18.7354	25.2111	53.1882	36.1358	33.3389	16.647		63.4046	122.341	184.25	164.685	55.4739	138.47	162.824	120.977	76.3966	88.8041
130.894	153.748	185.286	164.199	260.63	197.749	171.417	252.565	172.524	146.179		217.69	240.42	264.137	275.78	202.506	164.057	140.004	169.174	164.698	251.614		15.9111	16.3629	16.6334	16.4288	19.1951	23.0478	38.148	33.7086	37.2447	18.1575		60.996	128.084	197.531	164.329	56.9488	145.488	167.936	135.168	73.4561	86.6721
110.633	145.645	175.974	167.705	257.688	194.827	158.296	249.732	174.652	145.619		215.878	248.344	256.6	278.894	189.739	167.315	137.801	168.623	151.074	244.835		12.3526	16.2587	16.886	16.2685	17.9083	22.9197	26.8007	34.9878	33.6706	18.6196		69.9874	122.617	207.269	165.992	56.4344	153.372	166.971	148.218	78.8269	91.5767
130.155	144.759	178.429	174.141	251.93	196.047	157.414	253.543	173.105	148.207		219.867	250.858	257.543	282.139	169.897	167.425	141.667	159.8	147.011	224.224		5.46235	16.3337	17.2556	17.1345	16.8126	20.6188	19.8959	29.6989	30.9443	20.7207		76.3608	123.667	205.796	165.152	42.0308	145.712	173.051	151.701	74.4576	85.5761
140.042	161	175.332	175.553	239.832	184.789	146.685	253.94	179.314	141.516		241.146	246.26	244.874	288.211	150.199	164.501	150.6	151.375	155.758	211.252		0.864681	17.0214	15.9028	17.462	16.6244	19.0197	6.42131	33.0669	35.4133	19.0166		85.6995	126.797	210.459	166.671	33.6814	142.786	170.118	156.332	75.3459	80.6856
146.88	155.243	176.438	170.588	230.367	181.575	147.894	255.097	184.736	150.408		262.924	246.886	236.327	298.587	131.319	165.856	161.772	148.018	183.461	202.187		8.13072	16.9064	14.627	18.3869	17.9115	19.1256	1.76083	33.851	33.3606	17.8931		92.6166	121.769	207.677	171.82	28.9443	133.437	170.934	157.669	73.3922	76.4842
150.619	160.788	183.359	171.703	230.006	179.844	146.177	258.329	184.903	157.88		272.261	252.755	240.864	301.355	121.52	167.974	172.255	138.513	189.475	203.065		13.5383	16.1612	13.2743	19.0673	17.5952	17.8466	14.1021	42.7171	33.8465	19.9451		95.0391	131.793	209.443	171.548	21.2346	133.006	170.789	168.973	70.754	79.6001
146.525	158.799	180.392	168.765	242.286	169.637	141.841	261.045	197.538	154.518		258.22	267.818	223.852	300.323	104.031	172.903	181.263	129.078	191.994	200.776		15.9952	16.4826	14.2218	17.711	16.0591	17.86	24.6759	48.3291	33.2821	19.5402		95.7279	126.731	202.226	172.495	7.64191	145.016	162.767	171.055	74.8169	81.3178
163.663	168.955	179.108	164.194	259.85	167.235	143.037	272.422	200.29	151.058		265.889	275.426	201.358	288.097	99.7448	185.921	185.233	120.035	196.981	203.273		21.424	16.6298	14.7321	18.0498	15.2489	15.8209	32.4185	50.4979	36.2763	22.5443		98.4921	128.89	196.252	174.187	1.16005	156.465	166.378	170.4	78.459	80.0113
176.626	179.248	180.779	159.714	267.686	171.012	140.364	274.745	201.233	146.748		269.008	274.939	173.988	263.923	82.7252	209.4	184.264	119.379	199.984	217.729		20.9153	19.0266	14.3098	18.8603	14.9052	19.4895	44.6458	47.8382	36.5556	24.1644		99.9354	125.151	194.521	185.848	11.4803	151.189	163.489	172.849	84.7701	75.1195
180.648	174.572	182.394	166.714	261.992	165.87	138.171	290.91	196.877	144.259		275.243	264.238	169.854	266.725	73.5807	219.3	186.37	122.164	203.901	211.771		18.5928	20.1806	13.6045	20.5029	16.0876	21.3876	42.3807	47.4492	32.3521	24.0116		107.136	117.053	184.857	189.213	31.0202	146.855	157.313	171.368	91.0251	78.9593
187.759	179.544	193.885	166.032	260.739	169.163	144.87	295.445	196.263	139.715		276.484	243.973	180.687	273.374	82.5345	227.453	191.19	115.757	207.147	221.495		13.8646	21.0309	15.7431	20.4652	15.7122	20.9875	38.6791	46.8832	25.7985	24.8682		102.413	123.989	185.92	186.982	54.1885	142.761	161.612	170.679	88.7943	74.0689
180.843	186.966	196.182	167.25	263.779	175.905	140.505	295.152	202.294	131.376		280.858	218.254	163.702	275.613	97.7604	228.139	195.693	119.784	204.087	235.286		9.66466	21.2201	16.5975	18.9568	13.9785	23.1153	42.2819	52.4115	20.1773	21.4346		105.396	125.664	174.324	192.039	69.5065	154.84	158.94	166.802	88.2121	70.825
191.456	178.26	203.162	176.268	264.416	177.333	143.798	307.316	192.307	134.147		279.324	195.681	162.136	271.881	112.182	235.554	184.066	129.86	186.772	240.591		5.34911	22.5605	16.7093	19.7511	12.2271	24.0017	45.9087	50.2378	7.27314	22.7738		103.008	130.49	171.264	191.717	84.1849	159.24	163.815	164.823	79.4356	70.1761
189.33	181.88	203.323	178.456	274.718	179.343	139.849	307.467	185.223	125.322		288.479	173.844	167.014	266.757	122.008	234.274	172.077	139.722	163.94	252.402		1.59681	22.7436	16.9514	19.6378	12.8018	26.8198	38.7146	46.6205	1.91035	22.4981		106.431	140.697	166.52	199.17	97.5155	162.818	163.185	166.031	90.7071	71.8939
192.411	178.916	204.181	179.824	274.612	180.925	142.482	305.033	197.82	121.453		277.503	144.328	166.919	258.091	134.998	230.82	170.209	149.351	161.531	257.519		8.14918	22.9308	17.8017	19.1093	11.9306	27.4386	29.3241	41.2927	5.29928	21.4975		105.077	135.862	149.428	200.829	110.622	161.076	159.165	158.262	102.431	71.904
191.2	184.136	210.56	176.742	267.019	192.023	150.973	301.842	216.088	116.083		283.089	120.347	166.798	267.15	139.457	218.987	162.137	152.027	157.333	261.537		11.2337	22.7359	18.2308	19.5206	18.4394	26.3826	23.1	36.9588	14.561	18.6987		102.541	141.814	153.674	196.89	118.267	150.802	161.918	151.313	105.684	70.1205
180.681	175.234	216.55	179.012	258.618	194.691	154.395	293.395	246.922	114.472		273.383	100.197	175.762	284.359	132.979	209.713	150.32	157.349	147.914	263.876		17.0533	23.3621	18.7153	21.1059	17.7989	27.1897	18.2926	41.2396	22.8189	15.6967		94.5274	139.516	164.317	198.531	135.16	142.148	155.504	148.139	107.228	67.0344
181.082	178.541	218.592	179.509	256.467	190.648	157.198	288.359	270.625	123.885		270.102	78.8672	189.269	295.364	152.013	229.786	143.94	157.249	142.57	258.825		22.2165	22.5058	20.4016	21.1998	17.7583	23.3252	10.8045	42.8647	32.2213	13.1154		102.074	143.343	169.164	190.739	147.845	145.19	148.2	142.156	108.509	72.7328
184.613	176.22	220.955	173.81	255.614	190.209	159.479	276.669	297.06	126.181		263.4	64.568	178.657	289.2	148.403	226.038	144.183	161.618	141.55	265.4		24.0199	20.8325	18.5583	20.3431	18.5999	22.1171	2.17486	48.9969	40.8373	12.6968		97.5273	148.364	176.512	183.095	157.767	141.696	152.541	134.795	105.222	71.0123
182.282	173.743	215.438	171.743	255.536	179.981	153.579	274.516	313.823	131.476		270.413	54.9243	182.263	287.205	141.333	223.779	151.492	167.417	130.81	264.536		25.6004	22.0738	15.4396	18.4454	18.1888	21.7326	4.82956	52.5848	40.8818	12.4088		101.383	148.542	171.547	183.781	160.841	149.261	150.569	125.896	108.313	72.6492
187.503	173.541	218.527	164.456	253.721	174.349	154.24	276.557	325.732	136.252		282.249	47.1822	204.967	284.497	142.597	226.936	148.824	172.25	133.09	252.48		24.2177	21.4565	15.0574	19.1146	17.2703	19.0545	19.935	50.934	45.5061	14.4982		104.906	156.393	174.889	175.045	162.965	137.502	155.69	121.542	114.517	74.6859
172.806	170.372	212.674	159.189	259.264	173.128	156.319	261.11	346.44	133.672		286.885	56.1814	212.447	286.521	144.355	217.085	152.473	176.283	135.254	236.279		22.4055	21.9287	16.2282	19.0875	18.4311	19.2059	31.5417	47.2888	42.1972	15.0122		112.001	150.297	177.776	173.331	156.137	125.647	150.551	124.684	124.094	77.3637
176.26	175.418	212.06	152.583	251.371	174.56	161.918	260.289	358.423	140.032		271.944	53.9169	230.944	282.398	154.593	208.139	157.671	170.326	153.493	220.058		21.9907	24.4316	17.7122	20.1776	17.8221	18.5751	30.0115	52.7746	47.0509	16.8421		112.938	144.691	184.759	164.376	149.082	119.381	151.6	123.225	121.276	77.708
172.091	182.34	210.186	146.652	258.734	175.449	164.072	260.806	358.176	144.207		275.006	64.9151	217.144	293.601	152.337	217.199	157.928	164.594	159.76	213.328		20.6874	24.2606	16.7477	19.5432	18.0389	19.1257	27.0599	53.7337	43.3132	15.8126		124.579	153.87	200.241	162.273	140.445	115.543	154.037	127.536	116.497	77.3948
174.219	178.665	197.776	150.894	263.189	173.837	157.407	265.155	350.81	149.52		275.079	74.8977	237.855	279.462	149.461	215.834	169.949	165.212	167.474	209.432		20.3033	23.5843	15.8791	17.8991	13.9254	19.236	31.7204	50.6829	38.5582	17.9506		127.919	147.042	204.024	170.969	131.698	111.967	158.775	132.722	113.419	76.6845
178.17	187.717	193.608	151.878	268.102	173.909	153.433	267.543	328.637	159.873		277.98	83.7473	221.862	265.822	155.294	215.649	193.153	160.19	177.317	203.709		20.3803	26.0081	15.3331	14.9749	13.909	19.8215	33.2145	46.9115	40.3585	19.2859		141.445	152.518	204.782	167.067	116.861	118.066	159.09	129.372	118.389	78.8942
174.64	194.335	194.974	158.65	267.915	169.8	151.327	275.556	315.884	156.043		281.308	96.4595	211.258	263.794	142.167	183.789	197.616	157.294	176.524	208.615		20.0509	26.4611	15.1648	14.0652	14.3914	23.3368	41.0943	44.2887	31.2807	18.6459		137.585	152.361	207.908	170.238	107.695	118.488	166.763	135.363	121.698	76.9815
169.665	204.898	197.98	162.457	266.823	170.059	142.847	285.548	295.017	167.919		282.863	110.831	210.828	264.427	151.729	178.944	200.749	151.744	174.678	196.169		21.9568	26.1001	16.0397	14.0319	12.8961	24.0977	39.6298	44.5626	21.2107	18.7644		146.893	155.616	201.744	181.107	86.9575	122.919	170.064	142.493	126.775	73.3652
172.428	208.878	200.896	170.668	270.805	172.741	137.756	287.33	287.027	171.297		289.587	129.633	186.561	255.355	157.875	173.625	197.9	145.367	181.268	184.792		22.7812	23.5564	15.8028	14.1351	14.1145	24.6588	37.8807	43.1718	10.7368	17.7939		146.686	158.171	202.263	180.136	66.9201	113.034	176.173	150.355	125.917	72.7727
166.7	208.54	202.033	177.802	269.027	167.324	137.949	287.616	277.681	181.775		276.029	149.344	182.079	248.296	163.184	163.587	205.48	147.631	177.864	191.213		23.2005	22.9457	14.0552	12.7702	16.5361	25.3369	36.7257	40.6052	2.5865	11.7298		145.364	148.439	204.709	189.963	50.6831	119.665	178.133	159.586	123.038	77.5579
173.102	220.322	206.163	178.955	263.972	177.725	138.007	294.477	271.62	188.228		273.794	157.806	160.035	238.272	162.04	169.928	202.121	137.875	182.287	195.752		23.8379	22.3861	13.2721	13.3538	15.5494	25.9488	35.3782	50.3619	11.0184	7.19755		146.268	153.585	198.302	193.83	41.1071	128.348	178.822	161.376	120.794	74.4489
168.992	222.23	200.468	182.759	266.491	177.167	146.631	286.85	274.378	186.339		273.573	180.63	134.404	245.176	151.263	185.27	201.216	139.444	170.211	201.251		24.3288	20.2046	12.2908	15.5493	19.2295	27.4851	37.5776	44.6244	24.2729	4.00033		149.574	157.362	191.319	197.917	34.8485	130.066	181.805	167.742	118.71	69.2105
168.469	224.695	196.346	185.221	258.299	185.623	144.72	284.947	278.167	193.994		275.391	190.114	141.94	257.486	157.122	172.387	201.794	136.658	172.558	202.943		24.8434	19.9474	12.9252	16.8513	20.012	27.4584	45.4148	41.3869	26.7149	1.39213		152.059	157.032	195.512	202.622	30.9481	133.141	183.161	165.291	115.799	65.2585
179.187	228.635	203.473	183.629	257.039	195.747	152.246	280.967	277.294	197.583		269.286	205.154	125.204	281.353	166.956	186.735	195.367	130.435	169.314	203.264		26.372	19.8342	12.0098	16.6755	19.8217	30.1416	40.8709	41.6163	34.0986	5.00124		153.709	170.024	196.886	195.755	29.7604	135.997	176.904	165.354	113.955	60.8946
183.073	230.757	207.433	184.143	255.688	198.73	156.096	277.391	283.218	195.997		267.562	217.219	134.214	284.808	166.949	190.866	185.855	135.401	167.677	201.802		24.5852	17.9544	13.4702	16.4649	20.3132	31.3618	42.312	36.5492	38.9534	8.22489		152.407	167.546	183.898	201.697	27.7768	135.383	178.854	169.102	106.18	57.8169
190.631	230.379	211.009	179.037	255.092	207.118	159.475	274.501	283.821	194.231		270.939	224.08	131.821	264.873	173.853	190.537	183.343	138.05	172.492	189.586		23.7805	16.8444	13.7596	17.1087	21.0579	31.1148	39.2659	40.9259	39.567	12.4532		151.811	174.12	172.93	198.623	20.7791	126.742	175.01	166.644	105.715	58.2545
199.038	222.793	206.211	180.244	261.602	209.713	165.373	264.937	293.046	181.489		276.91	238.402	130.333	264.57	156.792	209.731	175.591	144.63	166.114	194.721		24.5952	18.5115	13.3701	17.5658	22.3783	31.525	37.963	37.9093	39.567	15.344		142.477	177.425	170.458	190.733	20.1955	124.387	168.636	156.801	102.829	55.993
209.238	224.563	199.4	175.981	256.176	211.263	173.926	260.989	294.182	175.685		265.801	239.573	135.679	265.343	157.951	205.103	173.293	154.734	160.833	194.997		24.1932	17.633	13.4676	17.4426	21.1488	31.838	44.3623	39.411	42.8275	17.8816		143.39	180.443	173.948	190.47	19.9542	134.15	162.024	153.994	104.692	52.4747
222.643	235.098	194.494	173.772	254.533	216.896	176.365	255.579	295.207	174.434		269.626	250.76	120.522	264.546	160.216	211.377	162.201	157.172	157.578	182.722		24.7714	18.4406	14.5541	17.7774	20.3374	32.5836	39.105	43.8627	40.087	16.9387		146.362	186.857	171.502	185.721	16.0513	132.398	150.672	151.325	103.027	48.4355
220.577	230.48	188.597	177.524	255.005	213.205	166.768	253.015	303.721	179.625		272.004	253.414	123.776	269.05	157.622	206.814	159.711	164.049	149.223	181.098		23.4293	18.9546	15.4535	16.2407	21.2657	33.728	41.2719	34.2257	40.6603	17.3802		143.642	178.714	177.436	185.444	12.8648	137.262	144.623	143.471	109.473	49.5356
225.158	236.104	193.838	179.632	258.216	217.401	140.787	263.511	304.365	191.716		275.124	251.83	130.994	260.611	162.065	236.77	158.138	168.119	142.519	170.559		22.2226	20.4774	15.7395	14.5034	18.5135	31.5483	39.5697	40.2776	42.7809	18.7242		141.619	178.322	188.628	184.647	9.75901	145.655	130.49	131.516	100.623	50.8035
223.116	233.771	195.169	178.053	260.903	213.343	135.768	260.94	303.561	184.275		268.404	253.342	136.292	243.492	158.226	243.766	154.369	176.564	134.113	160.163		21.2876	20.8794	14.4352	15.3086	18.1559	30.5097	33.4884	40.8953	44.62	12.4275		128.437	170.929	186.572	182.408	5.78596	154.053	128.141	123.189	103.76	49.2865
211.686	237.179	188.47	175.748	256.444	208.555	118.339	261.314	303.031	185.408		271.436	243.616	138.639	218.421	159.499	233.44	148.278	189.754	130.016	149.036		21.7963	21.7795	14.9076	15.4141	17.9004	30.0801	35.2403	42.0776	41.6829	9.58693		128.251	162.923	179.246	183.706	4.34781	163.696	130.614	118.453	104.8	52.2631
210.574	238.395	184.919	170.2	254.169	210.016	101.629	267.281	301.351	181.833		269.921	240.415	143.68	211.17	162.898	228.475	137.839	188.314	124.323	142.023		21.8755	22.2618	14.3001	16.2906	17.7498	27.0441	35.1122	45.4371	47.9342	5.98117		124.026	165.769	182.279	176.868	10.9441	157.459	114.08	110.89	99.9347	53.0295
202.042	236.967	170.467	170.233	252.459	199.882	91.6183	264.914	303.624	176.297		265.539	253.231	154.784	220.573	159.478	213.314	137.948	190.978	116.546	132.14		20.8296	23.1349	14.7225	15.9091	17.5825	24.1155	34.1323	47.1233	46.2794	1.16961		127.088	163.023	178.795	178.936	16.1892	165.609	133.878	107.016	101.31	55.3993
198.664	252.039	167.229	169.628	238.915	195.518	78.3866	264.565	299.397	179.018		264.371	248.511	183.228	221.721	168.231	180.566	134.389	184.063	127.494	113.87		16.8851	23.2918	15.5435	16.8749	17.4041	23.0906	36.1637	47.7701	49.2009	2.35104		129.313	157.753	182.04	178.888	21.5099	163.448	127.051	104.779	104.825	61.3481
191.972	251.186	168.674	165.261	241.2	195.807	62.4355	254.95	298.64	181.567		260.565	253.08	197.182	223.591	162.098	186.756	137.306	181.993	128.962	104.187		16.311	23.3485	14.9661	17.6124	21.7999	21.3928	36.4851	47.2109	46.8443	4.57744		125.202	151.106	173.925	179.081	29.1828	155.091	118.395	104.343	100.788	63.3451
182.076	241.764	169.969	163.728	237.849	193.691	46.0539	254.195	305.316	177.306		258.782	243.697	211.05	226.69	149.128	206.205	139.459	182.666	132.352	101.161		19.0906	23.9437	15.2672	17.9764	21.0739	20.7947	37.9527	44.2955	46.6694	7.52317		120.682	148.746	173.954	183.601	32.8243	163.813	127.221	98.1806	101.3	64.3989
176.506	242.155	174.098	163.327	237.18	192.689	39.9153	256.19	302.957	172.396		256.709	233.809	219.446	236.031	145.008	204.976	138.163	180.635	141.349	98.1177		19.7123	24.8351	15.4515	18.8921	21.4889	18.7454	34.7492	49.402	43.3121	12.1377		119.545	159.81	166.932	178.213	41.7606	158.991	129.164	95.0719	93.8818	61.8807
165.822	234.197	176.126	165.328	230.128	187.964	39.2069	251.19	301.52	166.54		256.819	227.885	228.211	231.318	133.632	162.999	140.715	185.07	143.23	98.8591		20.8021	24.0391	16.7833	18.4736	22.4165	19.3135	38.9336	46.6839	38.2555	16.7466		112.048	155.419	154.379	175.003	55.2917	159.229	140.927	97.6756	100.369	62.5289
163.539	240.546	171.197	161.508	221.192	181.147	26.7312	255.814	300.317	181.364		255.254	224.992	243.738	245.4	126.747	160.003	135.47	184.678	140.468	95.8043		24.0816	26.4204	17.3224	18.2677	25.9201	19.1546	36.5723	48.3447	38.6787	17.8533		118.704	162.115	146.622	175.298	73.7322	157.014	148.143	90.4988	100.1	64.6997
156.611	237.001	175.188	162.13	220.399	177.695	26.2185	253.187	297.462	185.701		254.548	225.245	242.339	254.02	119.877	164.303	137.956	177.152	135.77	105.728		23.9851	24.5641	17.0382	17.3157	25.4032	16.2047	34.3878	50.0163	39.8011	17.8823		114.2	161.044	142.607	175.037	72.2947	141.142	146.333	93.7134	103.065	59.8873
146.348	236.248	173.606	174.249	221.433	177.041	27.5741	247.515	300.545	192.78		256.253	226.847	266.431	265.857	115.329	159.011	145.404	179.967	140.631	120.13		26.6557	22.9241	15.6648	16.9326	28.321	14.8719	39.3302	48.1284	36.4825	15.5645		118.909	157.198	139.841	182.462	73.6167	140.07	163.869	102.022	110.847	60.1963
146.778	234.573	177.028	180.372	220.446	208.371	21.8402	246.238	290.736	210.527		265.547	221.226	270.374	273.257	115.179	168.901	152.993	174.071	142.188	133.333		25.6003	22.8671	15.2215	18.7693	29.6126	15.1815	39.2692	49.0372	35.4467	17.4401		121.665	165.033	140.542	173.569	90.3071	132.023	155.151	111.355	110.453	60.3463
132.122	219.202	178.482	181.01	226.237	228.889	24.5185	250.968	296.901	210.594		264.265	231.41	251.174	274.693	107.761	178.075	158.942	175.563	134.262	144.874		25.3681	21.7036	15.7392	19.0589	30.1407	16.7181	30.3166	55.5756	22.4149	16.9867		116.454	163.432	147.83	169.635	105.072	132	170.626	124.774	103.835	58.8326
118.152	221.694	177.659	185.905	223.399	246.828	29.3826	258.304	297.526	219.778		272.156	229.374	243.658	273.874	112.851	164.064	159.294	170.053	137.87	155.835		24.8672	20.9127	15.7959	20.6328	28.4448	16.2113	20.1738	51.2337	9.54118	18.4423		119.959	164.049	145.021	170.429	118.016	137.254	181.746	127.794	109.243	59.7508
120.343	223.636	181.679	188.183	220.758	269.746	33.0535	260.519	289.139	222.254		267.952	236.933	238.299	280.571	110.454	160.559	160.486	160.899	144.168	169.056		21.3165	20.9178	14.8294	20.2583	28.8725	14.9949	15.7128	47.8478	0.477621	19.3941		115.995	166.347	144.993	156.425	129.75	128.985	183.375	138.666	110.549	55.8394
119.628	222.692	174.879	186.705	218.459	286.872	36.4645	252.528	286.978	225.211		268.011	255.503	246.134	276.655	119.856	160.74	162.879	164.657	138.541	178.977		21.3671	19.5059	15.8216	19.1994	28.6689	15.2888	10.0129	51.0652	7.89769	20.4875		115.544	159.435	148.305	156.84	128.847	138.698	195.298	141.204	121.675	56.6945
125.78	223.901	172.521	183.628	221.236	303.118	48.5304	246.61	280.08	225.598		266.777	268.496	237.379	281.567	141.598	164.64	160.154	157.574	142.001	194.956		19.4507	19.6725	13.9327	20.0381	26.688	14.6713	1.78887	48.9356	18.6838	19.7603		115	160.39	155.49	152.962	121.689	132.405	201.06	140.313	125.835	55.9033
128.768	218.4	177.838	194.652	231.207	320.956	63.0513	250.146	272.713	214.258		265.675	281.341	221.942	271.957	150.228	169.651	171.071	158.024	149.531	227.412		15.0431	16.195	14.3328	21.4859	23.4354	17.7573	0.96416	52.5744	26.1087	17.5317		105.802	153.86	155.346	147.779	110.433	125.132	197.822	154.224	123.392	52.4496
129.226	227.469	174.612	208.409	231.686	331.487	79.818	250.557	269.88	211.41		274.02	298.383	225.793	262.434	159.472	181.01	173.706	156.916	161.605	234.259		17.0401	16.4691	14.2882	25.3245	26.141	18.5732	7.61234	49.3255	35.4908	18.8556		104.011	153.139	170.957	147.434	108.001	118.505	199.508	148.214	124.311	55.9553
136.368	224.985	177.048	204.37	229.344	341.547	94.5678	252.992	255.322	209.734		279.144	299.457	208.888	250.544	163.887	187.382	177.22	150.601	160.877	238.436		16.705	17.3059	15.4363	24.2827	23.7742	18.7502	17.8488	51.2135	44.873	18.8171		93.3979	152.722	181.406	136.311	111.033	172.024	198.651	147.242	115.867	52.194
127.471	220.265	177.776	201.791	229.101	333.578	110.465	250.485	256.599	202.399		269.171	297.876	204.851	249.995	163.682	203.496	171.146	160.465	166.419	237.732		17.4896	16.1706	16.0397	23.931	24.0126	19.9508	26.5051	44.4867	53.2763	16.3013		86.0322	139.047	184.777	142.881	93.9281	197.994	200.832	142.924	107.873	47.7155
141.145	217.396	177.144	195.976	225.169	317.35	118.958	239.146	248.701	212.634		261.869	284.412	209.409	248.321	164.567	211.023	169.668	162.329	164.193	244.173		17.8264	17.5804	15.9946	23.9074	25.9069	21.2467	23.0395	40.3577	50.7065	16.0382		83.6668	143.876	174.388	143.479	79.1008	207.144	195.272	140.347	112.734	47.4985
150.113	210.88	175.977	185.653	219.273	305.15	128.905	236.598	250.023	213.782		250.426	290.905	209.001	255.681	158.004	215.831	163.788	167.383	166.727	253.866		16.9002	19.4175	16.6921	23.118	25.5357	21.3993	29.1101	46.8973	48.9618	14.7186		72.8228	143.832	176.428	135.291	64.1634	192.496	193.35	134.634	113.261	43.0165
151.41	222.62	172.67	176.606	213.007	284.205	140.737	224.904	257.881	223.314		258.436	277.352	215.729	245.337	164.564	193.359	159.638	170.216	163.775	256.126		17.9538	18.5674	16.8016	22.6558	24.508	21.8352	26.8035	50.3033	47.8916	16.6686		72.9043	138.711	175.315	146.008	56.4053	188.084	188.083	131.181	118.362	43.2883
161.732	217.39	178.851	173.984	209.758	260.058	153.707	228.461	249.16	231.248		263.156	270.895	207.302	240.936	162.504	193.706	156.169	167.145	168.848	265.946		17.6711	18.7864	15.2679	22.4873	25.2142	22.4462	21.0485	44.3322	47.4393	15.2241		63.951	134.732	173.119	137.562	51.1598	167.129	177.532	131.05	109.909	48.9706
163.424	214.533	175.802	173.425	205.285	241.536	153.077	228.691	250.222	226.43		265.045	262.904	214.457	242.591	152.816	197.281	153.488	170.071	165.656	256.712		17.1996	19.9964	16.3841	21.8149	25.8043	25.4581	14.9538	42.9143	48.4011	14.2516		62.8744	135.079	165.083	142.817	57.1148	158.763	174.331	138.49	112.468	44.9924
167.185	215.796	175.422	163.438	198.663	231.464	148.176	211.436	249.854	232.556		279.835	249.638	219.942	239.016	150.128	191.097	143.766	162.578	160.561	238.348		18.0492	21.3017	17.5031	19.9689	26.4221	23.3795	11.75	39.2755	49.6618	14.7808		64.2019	137.383	164.484	144.527	61.2423	144.776	168.529	130.141	112.214	50.4927
171.636	201.745	179.454	151.904	193.79	223.02	141.393	208.103	248.86	234.075		276.319	235.099	214.02	265.566	139.617	185.84	144.378	164.818	156.846	232.394		16.9874	21.1696	17.3531	17.7696	22.8333	22.5616	7.62155	45.9712	49.2798	13.4279		61.4972	136.48	158.082	142.899	67.5777	143.688	172.894	139.695	110.962	49.951
169.948	199.449	174.616	150.333	187.542	214.29	143.554	200.883	253.516	235.016		283.559	237.984	214.791	289.623	135.947	174.851	141.333	169.56	162.526	216.237		16.4492	19.976	15.4358	20.4092	21.9766	24.1406	1.48608	45.1684	46.8993	15.4361		64.2495	138.092	159.374	152.322	74.3871	83.476	173.546	133.732	117.634	51.4681
181.477	198.986	177.066	148.431	188.425	207.93	141.157	207.568	253.474	237.012		285.027	244.821	211.34	294.357	143.316	153.672	135.65	164.01	161.34	227.557		15.5058	22.3292	14.0837	17.8976	20.1858	22.7279	4.30832	46.9859	41.1613	15.3932		58.798	141.941	159.44	144.534	78.0489	47.1939	167.238	126.597	122.583	56.0042
180.267	203.054	171.193	154.908	189.133	217.538	145.341	214.136	252.588	224.833		283.195	254.019	237.355	299.756	146.119	140.29	141.438	166.757	169.76	222.875		15.0088	22.0128	14.8498	16.5035	21.4744	22.0242	10.6169	45.1417	38.6078	16.2883		53.8287	135.725	152.755	145.378	81.8178	27.5447	163.588	125.261	125.699	55.7252
186.521	207.034	168.821	161.681	192.919	231.906	148.804	212.886	242.206	222.934		281.222	253.994	233.673	293.683	149.252	147.079	132.37	164.766	175.54	212.94		16.8782	21.7079	14.4126	17.256	22.0569	25.0182	18.8647	41.7352	36.1015	19.5601		66.7009	137.182	148.595	152.105	89.2455	34.6893	147.967	123.398	118.539	58.1527
182.174	186.431	167.02	176.675	201.384	245.38	156.61	219.784	232.491	209.716		266.536	262.32	215.941	302.407	144.323	151.866	146.891	163.66	173.518	212.153		20.0171	19.9048	14.1618	17.8125	21.9431	27.5214	18.5271	39.685	34.935	16.274		59.0096	132.694	153.7	150.473	84.8639	37.0853	162.508	122.118	109.301	61.8645
174.792	184.674	155.407	176.929	200.374	264.821	166.567	216.931	233.998	199.051		247.995	258.863	209.723	306.682	146.609	145.844	150.246	166.404	165.864	188.299		21.4131	17.8186	14.0299	17.7807	23.2531	26.0782	21.8447	38.1734	33.7085	18.0724		68.9992	134.105	161.146	163.978	88.0327	46.6795	184.122	128.808	113.238	59.701
179.839	187.715	144.762	178.012	200.822	277.599	169.025	218.809	226.892	203.039		227.502	256.151	186.728	307.462	147.56	140.07	151.156	157.465	161.067	188.616		21.9886	16.2625	13.2263	20.1992	24.5291	23.0314	19.6116	47.0094	28.9623	18.8707		65.9437	137.256	158.775	157.144	80.8506	51.0681	190.236	127.169	108.46	69.2835
178.47	185.019	141.896	192.088	199.949	281.35	177.443	222.703	227.113	195.534		193.148	265.635	169.786	310.501	149.157	138.191	154.563	164.963	160.24	185.245		25.1366	16.8795	12.5907	20.6173	25.602	24.1062	22.4314	45.8921	27.3228	19.5685		60.529	134.335	161.024	155.553	80.4185	67.7435	200.579	139.998	104.122	69.5845
182.804	186.96	134.902	195.394	197.379	285.694	185.037	215.616	221.406	191.774		173.667	269.816	161.856	292.757	159.475	124.854	152.758	166.747	159.144	219.903		25.1465	16.707	13.3679	20.9514	29.4733	25.4644	23.2216	26.0909	29.3291	22.1052		62.789	138.16	157.999	156.013	85.2403	74.1412	199.807	134.824	100.715	69.057
180.999	180.843	131.03	191.017	199.815	291.784	187.947	215.446	213.121	184.535		141.311	263.865	138.664	270.984	160.677	133.997	147.902	165.851	155.014	233.683		23.611	17.6723	15.3491	21.2221	28.9898	23.7851	20.8495	21.2839	33.2546	21.8433		70.4768	139.523	147.473	150.388	72.8406	78.0864	200.372	138.989	96.7158	70.5104
182.366	182.6	118.961	189.61	197.986	293.036	200.618	208.438	209.259	177.581		123.512	253.467	127.533	263.443	157.446	128.158	153.046	164.01	155.83	230.552		24.6357	16.4012	15.8058	23.2258	29.4348	24.3054	22.4204	15.5217	35.4862	23.0847		71.1394	142.021	142.614	153.294	74.592	92.4399	203.467	145.719	94.4264	67.046
189.573	179.532	116.957	187.079	186.785	295.412	216.923	209.676	208.022	177.176		108.386	237.836	80.6556	255.729	153.551	133.323	143.817	150.411	154.738	237.548		24.2426	18.2664	15.2655	24.9585	24.8371	23.443	18.789	4.19544	40.5947	22.5446		75.6247	146.295	152.899	151.195	74.8766	115.269	206.536	141.127	87.3909	68.1003
184.049	179.003	113.246	191.147	187.189	285.501	220.6	209.758	211.792	167.411		90.9215	229.566	64.4817	255.925	156.635	122.137	156.726	152.812	144.798	248.656		22.2246	19.7941	16.9394	25.0704	23.0477	22.9327	22.8351	2.53562	44.0473	20.7555		64.7278	142.616	156.312	147.19	71.8503	108.91	225.318	148.255	87.9357	68.2801
191.873	182.77	109.631	187.35	177.42	283.071	214.499	209.794	210.055	164.264		84.0364	224.975	71.778	241.283	170.858	120.294	152.074	159.832	142.997	253.588		21.0757	22.8226	17.263	26.4767	22.9064	20.7726	27.6796	14.757	43.7749	23.7748		73.47	151.956	156.803	146.814	81.8361	110.089	222.085	152.495	89.4137	67.5978
193.781	180.147	121.863	187.82	175.036	278.454	209.455	212.829	211.031	160.067		79.2118	227.042	61.6321	242.272	169.974	124.756	151.731	158.328	155.065	275.697		22.2019	24.7218	17.7027	26.0386	19.1335	20.6304	27.2746	22.3762	44.0891	21.3089		66.0362	149.117	153.384	139.633	82.754	106.954	207.757	156.38	89.2527	70.1847
196.217	164.425	130.843	187.269	170.351	271.824	213.296	214.323	217.101	155.613		86.1158	222.359	84.3454	247.943	172.543	120.436	150.855	171.709	165.003	277.891		22.2865	25.0191	18.4597	23.5571	17.9712	20.7065	34.4718	34.6575	42.7521	21.6982		72.1647	144.425	161.948	145.578	95.7271	111.448	207.011	166.365	84.8386	67.4847
201.277	153.212	126.553	177.051	163.017	264.552	213.217	210.536	213.365	159.962		96.84	209.99	89.8676	264.888	183.834	121.512	146.531	171.489	171.936	285.543		19.3462	25.4248	18.5207	22.3519	17.9158	20.1635	36.4809	45.7494	41.11	19.9363		78.2379	148.14	168.256	146.817	95.8281	108.69	201.902	160.614	92.1818	72.5524
198.903	154.481	123.752	174.144	161.77	263.032	217.454	219.029	219.936	156.229		94.7207	208.877	105.328	287.085	179.872	126.819	144.079	171.55	174.38	247.9		16.9034	27.2647	18.8072	22.6111	14.7626	19.8364	38.6432	37.0521	39.0368	16.5323		80.1174	142.136	166.883	151.196	109.034	102.066	198.062	162.995	94.2498	79.1561
202.033	166.485	125.204	177.938	161.228	260.292	213.102	220.769	235.24	156.58		100.334	208.479	114.288	302.487	181.046	122.408	142.28	170.903	179.139	238.843		17.3822	26.7264	17.2257	21.4892	17.3614	22.4953	37.5643	39.667	32.151	15.0643		72.4519	138.724	171.773	158.108	116.238	112.858	190.551	158.491	100.239	83.6318
201.691	151.472	132.233	174.749	153.486	254.898	208.081	223.321	236.516	158.417		99.9353	214.672	109.645	304.488	181.816	134.366	131.796	174.556	179.695	231.254		16.4558	26.6266	17.8944	18.5126	18.2889	21.3491	38.119	45.1521	29.1343	13.8872		74.2138	132.177	175.078	162.191	111.062	108.414	178.538	157.073	100.508	89.5888
201.077	141.534	138.248	171.338	157.646	246.233	196.306	214.859	240.45	156.455		109.038	227.2	142.021	312.627	187.845	142.418	132.251	191.118	180.059	221.435		16.8604	25.5385	17.9644	16.5092	19.7002	20.332	40.4565	37.2902	25.0576	15.5716		73.2242	136.142	173.741	165.953	113.65	92.3749	181.769	159.238	104.403	89.0041
208.567	132.712	137.816	161.532	144.542	245.561	188.055	214.11	242.357	159.386		120.789	231.726	159.078	312.231	183.097	144.299	125.929	191.837	181.403	207.587		19.3073	24.036	17.2573	16.3041	20.4195	19.5777	41.7498	26.4176	24.3861	13.8979		79.9963	141.504	171.095	167.518	131.154	96.5195	176.008	158.539	114.786	91.747
204.287	121.134	138.332	151.148	150.579	247.588	187.829	217.365	237.704	154.059		127.957	236.885	161.792	330.12	169.823	179.296	121.961	190.034	195.325	196.091		16.9837	23.9435	17.7978	16.1426	24.5722	20.3519	39.7439	13.346	23.1851	11.5147		76.8906	141.644	166.61	162.429	136.187	105.159	160.524	159.069	114.222	93.6229
207.553	125.965	128.68	156.262	151.865	245.281	188.389	217.91	236.368	158.411		139.827	234.371	182.682	328.564	174.892	182.452	118.315	194.859	189.136	191.532		16.8096	24.0831	16.2912	16.956	27.8084	23.0781	40.3256	6.88353	25.4771	13.8419		79.497	148.452	158.661	169.478	143.162	106.963	158.057	156.461	108.226	88.1691
199.571	129.025	124.45	155.449	150.904	251.054	197.251	219.082	229.632	160.85		143.095	250.596	172.757	328.249	171.896	196.152	120.175	187.858	185.964	177.144		16.5381	24.4255	15.5625	15.3864	29.5658	21.4224	35.7976	3.7555	25.6284	13.3375		77.2047	149.153	158.377	167.918	139.137	94.9307	152.877	148.756	106.102	89.4283
194.967	139.847	118.906	156.981	157.303	257.52	202.664	233.937	229.646	153.385		149.704	267.571	183.453	320.131	159.479	198.373	125.584	186.562	183.553	168.061		14.8985	23.8201	16.5491	16.0974	28.3146	23.1083	36.6024	7.38068	29.6058	14.4016		82.2076	148.862	150.563	172.286	144.264	96.3228	160.199	151.226	103.134	87.3998
200.147	139.921	118.487	156.521	158.88	256.348	199.51	239.234	223.447	162.28		163.927	269.117	175.935	292.813	161.089	194.841	128.966	177.14	183.461	176.155		17.2397	23.4256	15.9068	15.3031	28.4221	24.2345	34.155	12.1838	27.8576	16.3164		83.4232	159.559	151.936	168.338	139.63	104.716	157.497	145.022	98.6522	84.7581
201.472	136.04	119.718	152.947	156.882	253.177	195.049	243.999	211.709	160.712		176.48	268.792	183.604	277.823	160.988	204.875	129.205	181.286	182.708	179.673		17.5086	22.9767	15.9937	14.8658	26.3179	23.3199	40.9578	23.209	31.6037	16.964		76.0392	158.655	146.411	163.727	149.63	94.1303	152.462	144.414	93.9848	80.5438
199.329	150.119	120.729	156.609	154.568	252.58	192.087	242.792	208.911	156.329		189.723	272.74	207.401	276.273	166.685	204.282	140.596	181.618	185.927	178.95		21.4532	21.8997	15.4124	16.4061	23.255	22.4858	37.4836	37.6717	32.9858	18.4504		72.7219	166.063	156.323	167.978	159.955	101.764	150.918	140.3	96.769	76.5507
194.371	159.103	124.335	161.864	157.323	259.289	189.922	249.429	201.761	161.124		196.269	269.694	201.336	271.657	165.26	193.172	141.765	175.24	186.243	184.237		21.9677	21.4234	14.975	16.0281	23.3421	22.3753	34.4466	40.5708	39.0522	15.0813		70.6404	157.437	153.917	170.182	167.662	99.1956	133.554	130.884	100.277	84.1118
188.303	169.061	134.497	164.813	169.064	260.044	204.074	255.241	202.226	155.021		204.146	264.131	216.353	259.966	165.694	192.277	150.656	174.495	188.948	224.904		18.8406	22.5457	14.6698	14.1298	23.2465	20.8885	31.0879	36.6312	35.04	16.2328		64.7212	157.15	155.271	174.754	164.427	105.962	132.964	126.717	91.1652	85.302
192.354	181.881	140.997	172.814	169.739	257.974	205.534	250.143	207.733	165.764		211.337	259.644	240.095	262.572	173.828	155.068	146.811	165.054	178.041	232.347		19.7206	21.4129	15.3782	13.6399	20.3304	19.9028	28.0103	34.7929	35.9336	16.0053		56.1597	154.477	163.567	181.812	167.616	97.7928	141.276	119.562	92.5661	87.6665
196.498	177.36	158.618	169.191	171.442	261.633	205.108	253.052	208.957	160.015		209.839	267.752	256.805	290.519	166.415	154.145	150.163	150.491	179.812	218.978		17.9728	20.8239	16.888	13.6967	16.9937	18.0992	26.6771	38.3111	38.2627	12.4845		40.5755	148.731	172.88	176.435	169.071	93.6825	128.419	115.139	92.1681	91.5711
200.272	188.775	176.095	171.587	178.085	259.66	201.197	257.409	219.942	155.615		211.944	257.81	267.234	294.384	173.42	145.53	148.185	151.283	174.402	262.545		21.9058	20.2228	17.3495	15.5704	13.7757	22.6659	25.7296	40.9799	38.998	7.18571		29.9578	149.632	164.186	184.18	189.087	97.4105	120.501	113.171	94.6297	91.03
204.618	187.471	196.432	169.821	184.392	259.204	194.472	246	221.862	163.522		222.385	247.196	270.499	292.834	177.525	143.54	140.755	153.568	168.566	286.425		22.534	20.3471	16.6559	13.7891	13.683	21.1934	28.1327	42.0528	36.2667	4.53219		14.441	143.927	164.186	185.504	193.944	87.2769	98.8713	108.684	93.1656	92.0354
203.414	190.229	217.636	162.775	196.766	256.285	196.888	243.92	223.696	152.86		217.28	251.582	252.552	297.576	183.095	170.981	143.045	159.667	164.7	285.758		19.6346	20.7172	17.2837	13.4972	13.5053	19.7402	30.8432	45.6431	38.0079	2.40937		4.8586	140.069	162.754	187.314	190.251	83.045	96.8706	117.38	91.9495	95.5234
209.108	183.51	220.79	158.983	203.675	259.032	199.284	238.517	226.178	150.697		215.468	251.314	258.549	301.381	182.495	162.721	138.627	153.02	165.6	288.701		21.8762	21.7045	18.4205	13.4138	15.9166	19.4215	28.4418	39.9277	40.5667	5.97424		9.00028	142.072	167.907	186.475	196.051	77.8632	103.177	125.025	94.4168	98.3072
214.765	174.186	219.582	154.948	216.858	260.583	199.944	242.382	225.234	150.25		208.815	249.775	260.438	305.934	168.583	155.879	128.597	149.109	164.553	289.021		20.171	22.3079	17.3187	12.7647	16.4957	22.5985	28.6922	36.7122	38.8004	10.5836		17.4265	136.541	161.321	177.687	203.75	62.3496	120.144	131.142	90.2955	101.552
217.856	173.002	217.589	153.461	223.939	256.236	197.225	245.588	226.143	140.478		210.926	252.607	259.016	305.528	173.486	155.534	127.131	154.698	172.137	284.897		20.8342	21.4611	17.066	11.8458	16.1026	23.5217	34.1807	33.3454	33.7168	15.0041		21.3667	138.505	167.161	173.955	210.624	65.21	133.317	141.014	86.7094	96.9809
228.017	160.421	223.174	155.84	226.701	261.811	184.727	240.115	216.84	143.199		205.125	258.27	237.421	313.32	182.837	160.492	120.609	154.894	173.398	247.326		20.2054	21.1802	17.879	11.7341	18.4097	25.1472	37.4173	35.9479	33.5061	17.647		29.6216	134.454	170.175	166.127	213.658	55.9757	123.818	145.711	80.216	93.2659
225.968	155.107	230.35	155.412	234.536	265.658	190.23	241.867	217.034	132.505		205.437	263.594	223.309	313.497	181.848	150.533	126.736	165.596	174.681	240.45		19.1266	21.328	17.3005	11.0084	18.5907	26.7605	43.4657	37.192	32.7456	21.3648		31.7536	138.49	163.361	156.779	219.358	52.8113	114.986	150.455	80.2195	94.5437
232.112	155.537	224.376	148.243	232.583	269.067	192.645	231.477	220.633	132.075		213.74	254.915	207.238	287.33	189.548	164.029	123.594	171.629	174.269	248.304		20.9775	22.4251	16.5917	11.1747	19.8998	25.5263	46.1596	36.5422	25.9115	21.6722		29.6003	142.613	159.514	156.825	227.225	57.0699	113.722	150.463	83.3858	97.8154
235.167	145.223	222.153	141.482	230.941	278.138	189.244	227.219	211.617	134.696		224.828	261.241	210.365	278.296	182.663	176.277	122.698	174.367	182.28	217.097		19.2117	23.6117	15.5227	10.883	21.8118	21.454	47.2325	43.5603	23.9625	20.1725		28.9403	133.247	165.229	146.545	210.933	54.8065	108.281	154.449	84.5156	98.3326
232.647	130.089	214.045	140.712	232.686	284.348	195.801	233.579	210.449	126.449		215.11	252.044	227.068	277.052	182.139	179.485	125.646	177.103	191.849	193.319		20.0994	25.0131	15.2551	11.7419	21.9885	20.8902	41.5078	40.9808	24.7457	22.2141		28.2292	132.968	167.304	135.974	211.833	53.5052	107.723	159.71	93.8572	98.027
228.404	111.678	203.564	147.168	218.312	291.784	199.551	223.215	200.52	129.977		217.656	240.849	253.768	267.379	174.861	155.619	117.809	178.146	192.621	183.682		20.9583	24.6979	15.3002	12.0463	24.4371	22.4159	42.8887	37.3906	21.3708	19.2197		19.6917	125.457	168.736	132.427	219.805	56.3418	104.891	153.867	97.5475	94.7193
223.027	99.4255	215.024	147.729	215.126	295.488	210.329	226.701	193.964	127.856		216.219	245.474	255.396	270.768	177.679	158.418	125.279	182.223	192.555	181.055		17.8165	24.0526	15.7932	12.2642	22.9556	23.0364	39.4376	46.7488	19.3308	20.2107		19.7362	123.676	164.218	132.6	213.023	60.1149	102.076	148.966	96.0119	92.6719
224.05	92.8899	226.365	143.115	211.523	295.98	210.316	219.431	195.76	127.3		213.136	232.683	248.142	271.719	186.209	149.006	130.219	187.451	189.753	184.529		17.2406	24.4959	15.6459	12.5584	24.1284	20.7098	44.3246	47.6715	22.052	20.3359		18.2161	122.891	161.79	139.053	211.258	72.4043	82.2834	157.986	99.2217	90.1982
222.97	76.3821	233.135	137.008	206.377	297.76	218.159	213.568	196.422	133.47		209.698	225.977	252.917	284.751	181.823	159.144	131.039	183.207	178.55	185.26		15.7468	24.5524	16.726	14.3551	25.3549	19.667	38.367	52.6128	22.099	17.7846		20.6009	119.908	164.528	143.296	204.26	70.5671	75.403	152.708	97.5995	88.4551
221.702	61.4427	235.949	128.106	206.249	293.416	225.116	213.307	198.882	131.235		210.219	219.947	266.067	317.655	176.327	166.266	128.972	186.532	172.797	186.878		17.3602	22.7932	18.649	15.1813	24.1351	20.9031	35.2275	46.9927	24.8408	20.1061		20.9713	122.344	163.157	152.896	198.584	77.9909	78.805	147.013	103.255	89.723
220.148	41.7671	230.684	123.572	199.643	289.476	223.211	208.621	199.614	163.862		220.991	218.752	264.338	317.102	174.439	188.342	120.2	176.277	161.263	212.729		16.7968	22.6454	20.2288	15.8492	23.7126	21.185	29.206	46.8432	28.3151	20.4668		18.704	114.564	162.265	166.862	185.382	83.8041	78.1858	137.082	106.031	88.1845
208.236	23.0394	238.144	121.869	207.527	287.702	220.884	212.773	194.878	199.208		214.997	222.959	284.364	319.097	167.779	180.755	124.337	178.941	177.228	234.32		16.3522	22.4895	21.1602	15.9558	22.2706	21.8068	25.4181	46.8432	29.0853	22.1254		18.0183	110.026	161.975	170.69	174.585	80.5817	79.3719	144.349	106.034	85.2709
201.512	0.0574409	239.624	116.486	208.642	280.19	235.021	216.598	201.699	220.411		198.122	216.212	266.426	315.978	175.093	167.222	130.071	173.605	182.273	239.477		16.4136	21.3093	20.5725	14.5902	21.6607	23.9586	22.6451	40.7721	35.3279	20.652		22.0449	121.724	161.257	176.663	177.058	79.399	106.488	131.647	111.392	88.2545
198.381	6.51662	242.684	102.732	202.502	277.829	232.785	222.281	200.664	244.22		201.56	226.185	237.606	305.464	172.584	166.091	137.203	170.483	179.079	233.08		14.7021	19.1289	19.4304	15.4715	21.8499	23.1474	20.6042	46.29	33.9342	20.2228		22.011	122.486	167.159	185.924	171.318	90.9346	111.441	127.755	106.919	88.7884
204.472	16.3662	237.016	94.3738	217.539	277.758	229.761	233.472	211.383	253.426		203.012	230.102	233.791	328.527	168.277	164.802	151.596	178.064	181.438	262.747		14.0644	19.0406	21.5514	16.1928	20.911	22.3227	22.2132	42.8421	40.7281	21.1361		23.2979	125.893	165.113	188.919	169.792	78.844	119.712	124.546	109.747	90.5117
198.771	29.1366	220.162	99.9148	222.117	279.768	220.236	234.259	223.095	275.756		203.949	231.162	230.22	336.723	166.44	169.683	151.895	181.631	178.575	271.034		14.825	20.2634	20.2516	15.4513	22.2764	20.9735	21.7054	35.9161	37.8397	18.5775		26.1604	122.715	167.383	198.393	182.912	55.687	139.306	121.513	117.028	95.07
[truncated: 556 more rows]
