# Supplementary material for: UBR-1 deficiency leads to ivermectin resistance in Caenorhabditis elegans
Source: eLife journal article supplement (doi:10.7554/elife.103718), 2024-12-13
Supplement: data1 [file Figure 1-figure supplement 2-source data2(C).xlsx]

## Sheet: Sheet1
WT	ubr-1(hp684)	ubr-1(hp865)	ubr-1(hp821 hp833)
48	98	84	70
60	90	68	72
42	96	86	80
56	100	90	76
54	96	80	84
