# Supplementary material for: UBR-1 deficiency leads to ivermectin resistance in Caenorhabditis elegans
Source: eLife journal article supplement (doi:10.7554/elife.103718), 2024-12-13
Supplement: data1 [file Figure 1-figure supplement 2-source data4(E).xlsx]

## Sheet: Sheet1
WT	ubr-1(hp684)	ubr-1(hp865)	ubr-1(hp821 hp833)
19	171	170	154
20	164	148	105
20	161	175	126
40	180	121	155
41	138	147	113
41	123	180	114
48	154	171	146
18	137	140	144
11	148	129	129
49	161	129	162
41	151	158	160
29	141	137	106
21	150	183	159
55	157	177	112
53	134	134	153
56	124	160	104
21	163	150	148
7	119	150	117
59	137	154	155
43	142	145	164
24	153	171	148
51	180	162	144
49	174	158	160
23	171	137	121
34	160	141	144
48	163	185	127
7	175	141	130
30	155	187	107
33	154	145	131
47	146	141	109
