# Supplementary material for: UBR-1 deficiency leads to ivermectin resistance in Caenorhabditis elegans
Source: eLife journal article supplement (doi:10.7554/elife.103718), 2024-12-13
Supplement: data1 [file Figure 1-figure supplement 2-source data5(F).xlsx]

## Sheet: Sheet1
WT	ubr-1(hp684)	ubr-1(hp865)	ubr-1(hp821 hp833)
18.4817	140.64	89.558	59.7915
19.2872	138.558	108.586	80.8644
21.0046	144.229	91.8016	74.2391
18.0238	158.218	147.368	67.7436
23.0557	162.112	126.883	107.028
23.6652	135.68	113.248	122.458
31.1814	153.767	88.9786	59.9155
36.8633	125.811	76.2067	108.096
29.9895	114.829	75.2067	96.1581
16.2976	85.3607	84.4783	84.5123
