# Supplementary material for: UBR-1 deficiency leads to ivermectin resistance in Caenorhabditis elegans
Source: eLife journal article supplement (doi:10.7554/elife.103718), 2024-12-13
Supplement: data1 [file Figure 1-source data 1(A-B).xlsx]

## Sheet: Sheet1
	WT						ubr-1(hp684)
Ctrl	100	100	100	100	100		100	100	100	100	100
IVM	48	60	42	56	54		98	90	96	100	96
AVM	44	48	56	60	50		74	82	90	88	80
DOM	58	46	44	62	52		76	82	80	86	94
