# Supplementary material for: UBR-1 deficiency leads to ivermectin resistance in Caenorhabditis elegans
Source: eLife journal article supplement (doi:10.7554/elife.103718), 2024-12-13
Supplement: data1 [file Figure 1-source data 3(D).xlsx]

## Sheet: Sheet1
	WT						ubr-1(hp684)
0 h	100	100	100	100	100		100	100	100	100	100
2 h	100	100	100	100	100		100	100	100	100	100
4 h	100	100	100	100	100		100	100	100	100	100
6 h	94	96	100	99	98		100	100	100	100	100
8 h	94	95	90	98	90		100	100	100	100	100
10 h	90	80	70	88	83		92	100	100	100	100
12 h	70	76	68	80	72		92	100	100	98	100
14 h	60	74	60	76	64		92	100	100	98	98
16 h	60	68	50	70	60		92	98	100	92	98
20 h	48	60	42	56	52		90	96	100	92	98
24 h	34	42	30	44	40		83	92	90	80	84
32 h	32	22	24	36	27		68	82	80	66	70
40 h	28	20	24	26	18		54	64	70	56	62
48 h	12	6	14	16	4		44	22	38	24	37
