# Supplementary material for: UBR-1 deficiency leads to ivermectin resistance in Caenorhabditis elegans
Source: eLife journal article supplement (doi:10.7554/elife.103718), 2024-12-13
Supplement: data1 [file Figure 1-source data 5(F).xlsx]

## Sheet: Sheet1
IVM 0 ng/mL			IVM 5 ng/mL
WT	ubr-1		WT	ubr-1
1.1021	1.11873		0.73072	0.936968
1.0139	1.06643		0.577538	0.951823
1.2102	1.06105		0.666709	1.0666
1.0101	1.18323		0.717993	0.945622
1.1725	1.17642		0.537086	0.967068
1.0678	0.97733		0.628027	0.895753
1.0526	0.972437		0.637221	0.984895
1.0705	1.04704		0.679277	1.01771
1.0101	1.0081		0.438704	1.00483
1.006	1.13728		0.554044	0.898183
