# Supplementary material for: UBR-1 deficiency leads to ivermectin resistance in Caenorhabditis elegans
Source: eLife journal article supplement (doi:10.7554/elife.103718), 2024-12-13
Supplement: data1 [file Figure 1-source data 6(G).xlsx]

## Sheet: Sheet1
IVM 0 ng/mL			IVM 5 ng/mL
WT	ubr-1		WT	ubr-1
241	254		19	171
263	229		20	164
216	239		20	161
257	239		40	180
221	294		41	138
241	285		41	123
240	212		48	154
271	219		18	137
215	266		11	148
219	273		49	161
283	223		41	151
252	285		29	141
236	210		21	150
257	257		55	157
232	235		53	134
250	267		56	124
268	273		21	163
281	210		7	119
263	246		59	137
253	223		43	142
246	249		24	153
281	278		51	180
253	268		49	174
214	286		23	171
288	290		34	160
214	240		48	163
222	300		7	175
231	286		30	155
246	254		33	154
269	232		47	146
