# Supplementary material for: UBR-1 deficiency leads to ivermectin resistance in Caenorhabditis elegans
Source: eLife journal article supplement (doi:10.7554/elife.103718), 2024-12-13
Supplement: data1 [file Figure 1-source data 8(I).xlsx]

## Sheet: Sheet1
IVM 0 ng/mL			IVM 5 ng/mL
WT	ubr-1		WT	ubr-1
199.439	247.584		18.4817	140.64
220.887	275.77		19.2872	138.558
187.202	231.369		21.0046	144.229
202.707	264.079		18.0238	158.218
230.786	163.138		23.0557	162.112
207.693	172.695		23.6652	135.68
168.207	151.477		31.1814	153.767
223.67	176.259		36.8633	125.811
197.636	140.682		29.9895	114.829
165.559	199.782		16.2976	85.3607
