# Supplementary material for: UBR-1 deficiency leads to ivermectin resistance in Caenorhabditis elegans
Source: eLife journal article supplement (doi:10.7554/elife.103718), 2024-12-13
Supplement: data1 [file Figure 2-figure supplement 1-source data2(B).xlsx]

## Sheet: Sheet1
Control	Control+cef	Diluted	Condensed+Cef
39.6806	2.86632	2.83433	38.8135
45.6153	2.86207	2.55158	42.6118
43.8312	3.21137	3.78692	41.1864
39.873	2.43217	2.59739	44.8306
48.6635	2.83975	2.89298	40.3586
