# Supplementary material for: UBR-1 deficiency leads to ivermectin resistance in Caenorhabditis elegans
Source: eLife journal article supplement (doi:10.7554/elife.103718), 2024-12-13
Supplement: data1 [file Figure 2-figure supplement 1-source data3(C).xlsx]

## Sheet: Sheet1
Control			Control+cef			Diluted			Condensed+Cef
WT	ubr-1		WT	ubr-1		WT	ubr-1		WT	ubr-1
48	98		54	70		64	94		60	64
60	90		66	64		54	92		58	70
42	96		62	64		58	94		62	68
56	100		58	60		56	98		60	62
54	96		60	56		50	100		54	60
