# Supplementary material for: UBR-1 deficiency leads to ivermectin resistance in Caenorhabditis elegans
Source: eLife journal article supplement (doi:10.7554/elife.103718), 2024-12-13
Supplement: data1 [file Figure 2-figure supplement 1-source data4(D).xlsx]

## Sheet: Sheet1
Control			Control+cef			Diluted			Condensed+Cef
WT	ubr-1		WT	ubr-1		WT	ubr-1		WT	ubr-1
0.73072	0.936968		0.640217	0.636608		0.699902	0.931115		0.553599	0.715427
0.577538	0.951823		0.560101	0.64919		0.657909	0.917349		0.582756	0.628806
0.666709	1.0666		0.5502	0.660362		0.694682	0.96739		0.636901	0.731042
0.717993	0.945622		0.521976	0.67039		0.601173	0.926091		0.661665	0.601765
0.537086	0.967068		0.597697	0.69906		0.591176	0.923586		0.683139	0.74984
0.628027	0.895753		0.542917	0.605564		0.641089	0.918397		0.645559	0.72081
0.637221	0.984895		0.478156	0.622022		0.718719	0.926976		0.662462	0.607342
0.679277	1.01771		0.590429	0.773272		0.616322	0.900296		0.663213	0.604168
0.438704	1.00483		0.604514	0.634037		0.660568	0.904667		0.678089	0.642675
0.554044	0.898183		0.575916	0.704553		0.757822	0.920146		0.669836	0.546559
