# Supplementary material for: UBR-1 deficiency leads to ivermectin resistance in Caenorhabditis elegans
Source: eLife journal article supplement (doi:10.7554/elife.103718), 2024-12-13
Supplement: data1 [file Figure 2-figure supplement 1-source data5(E).xlsx]

## Sheet: Sheet1
Control			Control+cef			Diluted			Condensed+Cef
WT	ubr-1		WT	ubr-1		WT	ubr-1		WT	ubr-1
19	171		24	28		25	157		28	50
20	164		22	24		17	183		40	41
20	161		28	36		18	155		50	39
40	180		26	29		42	194		21	45
41	138		27	30		31	130		30	49
41	123		12	22		24	156		44	51
48	154		30	48		44	150		18	55
18	137		24	18		20	165		35	49
11	148		48	8		36	146		38	23
49	161		31	28		30	145		27	35
41	151		22	31		26	161		15	11
29	141		32	45		35	152		34	8
21	150		44	31		28	142		25	48
55	157		27	27		40	146		39	49
53	134		25	34		32	138		30	44
56	124		10	60		29	129		25	46
21	163		27	39		46	133		48	35
7	119		36	22		12	152		19	54
59	137		22	31		31	105		28	42
43	142		52	32		27	116		11	37
24	153		28	34		22	167		29	30
51	180		28	36		35	127		38	27
49	174		10	30		26	140		43	43
23	171		34	23		19	195		25	7
34	160		37	17		32	199		12	52
48	163		30	24		24	173		30	39
7	175		31	20		49	193		33	43
30	155		28	32		20	198		23	57
33	154		29	44		26	165		19	48
47	146		32	35		35	170		32	50
