# Supplementary material for: UBR-1 deficiency leads to ivermectin resistance in Caenorhabditis elegans
Source: eLife journal article supplement (doi:10.7554/elife.103718), 2024-12-13
Supplement: data1 [file Figure 2-figure supplement 1-source data6(F).xlsx]

## Sheet: Sheet1
Control			Control+cef			Diluted			Condensed+Cef
WT	ubr-1		WT	ubr-1		WT	ubr-1		WT	ubr-1
18.4817	101.494		32.9759	25.1844		12.421	125.004		29.1292	18.4987
19.2872	125.042		17.6298	20.0369		16.2193	84.7595		13.2235	21.6731
21.0046	115.516		24.6214	60.0337		15.4624	102.091		13.4609	18.1842
18.0238	108.941		14.0243	24.424		23.7848	113.773		17.0253	13.3158
23.0557	119.407		27.5014	19.0713		12.1644	84.0889		21.4086	17.249
23.6652	92.6847		29.4812	18.0193		15.4268	89.4031		23.2033	23.0335
31.1814	106.451		26.7199	22.9791		22.7289	97.0385		17.8658	10.5851
36.8633	107.458		54.5485	18.1757		15.2183	95.1957		15.2786	19.0528
29.9895	92.0095		21.1769	36.1099		18.2738	109.138		19.4574	14.7992
16.2976	115.048		23.2584	21.902		15.2389	98.0221		16.6148	15.2548
