# Supplementary material for: UBR-1 deficiency leads to ivermectin resistance in Caenorhabditis elegans
Source: eLife journal article supplement (doi:10.7554/elife.103718), 2024-12-13
Supplement: data1 [file Figure 2-source data 1(B-C).xlsx]

## Sheet: Sheet1
	IVM 5 ng/mL
	WT						ubr-1(hp684)
Ctrl	48	60	42	56	54		98	90	96	100	96
Glu	74	82	78	78	74		98	96	96	98	100
GABA	48	54	58	60	56		94	98	98	94	98
Asp	52	50	62	58	58		92	100	96	96	98
