# Supplementary material for: UBR-1 deficiency leads to ivermectin resistance in Caenorhabditis elegans
Source: eLife journal article supplement (doi:10.7554/elife.103718), 2024-12-13
Supplement: data1 [file Figure 2-source data 2(D).xlsx]

## Sheet: Sheet1
	IVM 5 ng/mL
	WT											ubr-1(hp684)
Ctrl	0.73072	0.577538	0.666709	0.717993	0.537086	0.628027	0.637221	0.679277	0.438704	0.554044		0.936968	0.951823	1.0666	0.945622	0.967068	0.895753	0.984895	1.01771	1.00483	0.898183
Glu	0.746211	0.733333	0.729383	0.847243	0.799147	0.726421	0.733189	0.764807	0.773232	0.773434		1.00042	0.951289	1.02398	0.926878	0.997228	0.980221	1.06927	0.988499	0.934179	0.929553
GABA	0.66554	0.645614	0.578731	0.647665	0.634086	0.660201	0.700307	0.62582	0.649461	0.631108		1.07626	0.996182	0.961166	1.02592	1.01295	0.957815	0.909561	0.933892	0.902807	0.911453
Asp	0.632128	0.597141	0.603765	0.65456	0.611724	0.675894	0.690379	0.628364	0.644114	0.64806		0.916109	1.03209	1.00197	0.985984	0.963985	0.931811	0.90524	0.926587	0.930401	0.927924
