# Supplementary material for: UBR-1 deficiency leads to ivermectin resistance in Caenorhabditis elegans
Source: eLife journal article supplement (doi:10.7554/elife.103718), 2024-12-13
Supplement: data1 [file Figure 2-source data 3(E).xlsx]

## Sheet: Sheet1
	IVM 5 ng/mL
	WT
Ctrl	19	20	20	40	41	41	48	18	11	49	41	29	21	55	53	56	21	7	59	43	24	51	49	23	34	48	7	30	33	47
Glu	66	82	67	57	58	55	62	72	58	60	61	66	50	55	52	53	60	79	54	51	69	52	60	64	63	49	57	50	76	77
GABA	35	38	40	9	30	27	28	35	45	37	25	27	30	43	18	25	38	30	22	32	27	33	24	20	11	19	39	50	21	22
Asp	38	29	15	31	28	18	11	20	35	41	30	28	32	35	21	26	26	34	33	42	39	10	33	36	28	35	30	45	31	15
	ubr-1(hp684)
Ctrl	171	164	161	180	138	123	154	137	148	161	151	141	150	157	134	124	163	119	137	142	153	180	174	171	160	163	175	155	154	146
Glu	148	150	171	143	145	143	189	161	114	124	159	147	112	144	111	182	164	126	161	120	149	131	164	179	150	162	156	126	135	113
GABA	151	141	172	133	159	143	153	159	141	144	161	157	146	166	158	171	140	140	171	133	156	139	127	162	144	160	192	155	156	136
Asp	142	126	175	143	159	152	175	163	146	158	164	135	150	160	133	145	171	160	160	150	144	159	166	192	128	138	136	159	168	143
