# Supplementary material for: UBR-1 deficiency leads to ivermectin resistance in Caenorhabditis elegans
Source: eLife journal article supplement (doi:10.7554/elife.103718), 2024-12-13
Supplement: data1 [file Figure 2-source data 4(F).xlsx]

## Sheet: Sheet1
	IVM 5 ng/mL
	WT											ubr-1(hp684)
Ctrl	18.4817	19.2872	21.0046	18.0238	23.0557	23.6652	31.1814	36.8633	29.9895	16.2976		101.494	125.042	115.516	108.941	119.407	92.6847	106.451	107.458	92.0095	115.048
Glu	83.2539	39.8083	47.0222	85.1023	42.682	48.8206	57.5347	53.5548	114.876	51.6429		111.054	120.161	129.427	112.374	99.668	110.028	98.2365	94.1691	114.585	100.162
GABA	13.7046	13.9343	17.0968	11.6821	12.9804	14.69	11.9678	14.7796	12.9462	11.4135		109.735	105.644	122.627	99.4457	114.315	116.037	121.587	124.874	125.899	116.405
Asp	23.3604	14.6343	26.4847	22.3314	18.9541	14.586	14.4799	11.5546	21.9017	14.2198		108.283	80.9659	127.442	91.6982	116.057	120.045	109.998	103.638	103.638	88.0301
