# Supplementary material for: UBR-1 deficiency leads to ivermectin resistance in Caenorhabditis elegans
Source: eLife journal article supplement (doi:10.7554/elife.103718), 2024-12-13
Supplement: data1 [file Figure 2-source data 5(H).xlsx]

## Sheet: Sheet1
Cef (µg/mL)	ubr-1(hp684) IVM 5 ng/mL
0.05	90	96	94	100	94
0.5	98	90	94	94	96
5	76	86	80	78	86
50	64	70	56	64	60
500	68	62	60	64	60
