# Supplementary material for: UBR-1 deficiency leads to ivermectin resistance in Caenorhabditis elegans
Source: eLife journal article supplement (doi:10.7554/elife.103718), 2024-12-13
Supplement: data1 [file Figure 2-source data 6(I).xlsx]

## Sheet: Sheet1
IVM 5 ng/mL
	WT						ubr-1(hp684)
Cef -	56	58	46	46	60		94	90	94	98	98
Cef +	54	66	62	58	60		70	64	64	60	56
