# Supplementary material for: UBR-1 deficiency leads to ivermectin resistance in Caenorhabditis elegans
Source: eLife journal article supplement (doi:10.7554/elife.103718), 2024-12-13
Supplement: data1 [file Figure 2-source data 7(J).xlsx]

## Sheet: Sheet1
IVM 5 ng/mL
	WT											ubr-1(hp684)
Cef -	0.637221	0.73072	0.577538	0.666709	0.717993	0.537086	0.628027	0.679277	0.438704	0.554044		0.936968	0.951823	1.0666	0.945622	0.967068	0.895753	0.984895	1.01771	1.00483	0.898183
Cef +	0.640217	0.560101	0.5502	0.521976	0.597697	0.542917	0.478156	0.590429	0.604514	0.575916		0.636608	0.64919	0.660362	0.67039	0.69906	0.605564	0.622022	0.773272	0.634037	0.704553
