# Supplementary material for: UBR-1 deficiency leads to ivermectin resistance in Caenorhabditis elegans
Source: eLife journal article supplement (doi:10.7554/elife.103718), 2024-12-13
Supplement: data1 [file Figure 2-source data 7(K).xlsx]

## Sheet: Sheet1
IVM 5 ng/mL
	WT
Cef -	19	20	20	40	41	41	48	47	18	11	49	41	29	21	55	53	56	21	7	59	43	24	51	49	23	34	48	7	30	33
Cef +	24	22	28	26	27	12	30	24	48	31	22	32	44	27	25	10	27	36	22	52	28	28	10	34	37	30	31	28	29	32
	ubr-1(hp684)
Cef -	171	164	161	180	138	123	154	137	148	161	151	141	150	157	134	124	163	119	137	142	153	180	174	171	160	163	175	155	154	146
Cef +	28	24	36	29	30	22	48	18	8	28	31	45	31	27	34	60	39	22	31	32	34	36	30	23	17	24	20	32	44	35
