# Supplementary material for: UBR-1 deficiency leads to ivermectin resistance in Caenorhabditis elegans
Source: eLife journal article supplement (doi:10.7554/elife.103718), 2024-12-13
Supplement: data1 [file Figure 2-source data 7(L).xlsx]

## Sheet: Sheet1
IVM 5 ng/mL
	WT										ubr-1(hp684)
Cef -	19.2872	21.0046	18.0238	23.0557	23.6652	31.1814	36.8633	29.9895	16.2976		101.494	125.042	115.516	108.941	119.407	92.6847	106.451	107.458	92.0095	115.048
Cef +	17.6298	24.6214	14.0243	27.5014	29.4812	26.7199	54.5485	21.1769	23.2584		25.1844	20.0369	60.0337	24.424	19.0713	18.0193	22.9791	18.1757	36.1099	21.902
