# Supplementary material for: UBR-1 deficiency leads to ivermectin resistance in Caenorhabditis elegans
Source: eLife journal article supplement (doi:10.7554/elife.103718), 2024-12-13
Supplement: data1 [file Figure 3-figure supplement 1-source data2(B).xlsx]

## Sheet: Sheet1
		RNAi
WT	ubr-1	Pubr-1	Pmyo-2	Prgef-1	Pmyo-3
48	98	74	70	80	66
60	90	84	68	72	60
42	96	78	86	70	64
56	100	78	94	70	70
54	96	84	92	68	64
