# Supplementary material for: UBR-1 deficiency leads to ivermectin resistance in Caenorhabditis elegans
Source: eLife journal article supplement (doi:10.7554/elife.103718), 2024-12-13
Supplement: data1 [file Figure 3-figure supplement 1-source data3(C) .xlsx]

## Sheet: Sheet1
		RNAi
WT	ubr-1	Pubr-1	Pmyo-2	Prgef-1	Pmyo-3
0.73072	0.936968	0.818641	0.738116	0.797988	0.612582
0.577538	0.951823	0.946039	0.785807	0.775401	0.688824
0.666709	1.0666	0.832539	0.81998	0.742748	0.692414
0.717993	0.945622	0.793646	0.748552	0.734397	0.753132
0.537086	0.967068	0.853926	0.785463	0.788772	0.690711
0.628027	0.895753	0.860525	0.897892	0.616272	0.726763
0.637221	0.984895	0.825994	0.695525	0.903193	0.766994
0.679277	1.01771	0.880586	0.816159	0.759717	0.743686
0.438704	1.00483	0.872189	0.774301	0.840577	0.667747
0.554044	0.898183	0.81582	0.927394	0.777816	0.704831
