# Supplementary material for: UBR-1 deficiency leads to ivermectin resistance in Caenorhabditis elegans
Source: eLife journal article supplement (doi:10.7554/elife.103718), 2024-12-13
Supplement: data1 [file Figure 3-figure supplement 1-source data4(D).xlsx]

## Sheet: Sheet1
		RNAi
WT	ubr-1	Pubr-1	Pmyo-2	Prgef-1	Pmyo-3
19	171	64	78	68	65
20	164	60	92	69	60
20	161	57	77	62	38
40	180	84	75	52	50
41	138	90	87	32	49
41	123	54	95	83	22
48	154	137	102	42	62
18	137	123	68	44	40
11	148	69	87	10	53
49	161	72	85	62	47
41	151	65	120	7	75
29	141	60	101	46	38
21	150	69	88	49	49
55	157	74	67	50	72
53	134	51	70	72	53
56	124	60	93	74	50
21	163	55	83	87	59
7	119	63	75	50	49
59	137	87	76	14	72
43	142	84	90	59	52
24	153	63	75	64	12
51	180	55	93	48	66
49	174	51	99	50	54
23	171	49	88	78	63
34	160	63	101	7	47
48	163	55	66	48	23
7	175	62	68	10	52
30	155	48	75	70	22
33	154	78	88	78	36
47	146	69	72	22	48
