# Supplementary material for: UBR-1 deficiency leads to ivermectin resistance in Caenorhabditis elegans
Source: eLife journal article supplement (doi:10.7554/elife.103718), 2024-12-13
Supplement: data1 [file Figure 3-figure supplement 1-source data4(E).xlsx]

## Sheet: Sheet1
		RNAi
WT	ubr-1	Pubr-1	Pmyo-2	Prgef-1	Pmyo-3
18.4817	101.494	124.458	64.048	73.1459	118.44
19.2872	125.042	104.212	43.2428	39.9704	97.163
21.0046	115.516	128.592	38.1131	76.5384	104.448
18.0238	108.941	152.221	87.7058	79.6253	52.4188
23.0557	119.407	137.975	65.1652	77.7402	62.4353
23.6652	92.6847	142.201	76.495	46.4063	62.0149
31.1814	106.451	131.446	97.5557	79.2924	71.733
36.8633	107.458	141.62	87.3205	99.2442	57.5025
29.9895	92.0095	89.22	104.624	69.626	59.5282
16.2976	115.048	94.049	46.9059	67.2529	79.6655
