# Supplementary material for: UBR-1 deficiency leads to ivermectin resistance in Caenorhabditis elegans
Source: eLife journal article supplement (doi:10.7554/elife.103718), 2024-12-13
Supplement: data1 [file Figure 3-source data 1(B).xlsx]

## Sheet: Sheet1
WT	ubr-1	got-1	ubr-1;got-1	ubr-1;got-1+GOT-1	eat-4	ubr-1;eat-4	ubr-1;eat-4+EAT-4
48	98	46	62	86	50	62	82
60	90	44	56	90	44	62	94
42	96	66	70	82	66	72	90
56	100	50	66	88	52	60	84
54	96	48	56	78	52	78	78
