# Supplementary material for: UBR-1 deficiency leads to ivermectin resistance in Caenorhabditis elegans
Source: eLife journal article supplement (doi:10.7554/elife.103718), 2024-12-13
Supplement: data1 [file Figure 3-source data 3(D).xlsx]

## Sheet: Sheet1
WT	ubr-1	got-1	ubr-1;got-1	ubr-1;got-1+GOT-1	eat-4	ubr-1;eat-4	ubr-1;eat-4+EAT-4
21	150	66	58	143	2	51	65
55	157	57	16	103	14	35	91
53	134	74	42	87	67	13	85
56	124	32	37	107	27	31	46
21	163	66	27	114	32	46	71
7	119	26	49	97	71	50	46
59	137	56	54	89	26	19	42
43	142	44	46	88	48	27	44
24	153	10	13	66	63	75	44
51	180	51	16	93	49	45	68
49	174	54	31	108	30	10	51
23	171	72	45	99	8	68	59
34	160	25	24	69	15	74	66
48	163	8	26	77	59	57	42
7	175	61	26	95	41	74	76
30	155	28	38	111	55	69	46
33	154	50	28	70	29	45	53
47	146	54	23	75	45	56	82
