# Supplementary material for: UBR-1 deficiency leads to ivermectin resistance in Caenorhabditis elegans
Source: eLife journal article supplement (doi:10.7554/elife.103718), 2024-12-13
Supplement: data1 [file Figure 3-source data 4(E).xlsx]

## Sheet: Sheet1
WT	ubr-1	got-1	ubr-1;got-1	ubr-1;got-1+GOT-1	eat-4	ubr-1;eat-4	ubr-1;eat-4+EAT-4
18.4817	101.494	21.2726	36.8963	82.1471	18.7419	56.7749	69.167
19.2872	125.042	40.9232	15.6102	91.2597	15.8849	71.8161	56.2746
21.0046	115.516	33.3424	45.8692	115.446	13.2788	55.7454	89.7713
18.0238	108.941	33.9086	53.4352	60.6268	17.8585	75.2618	99.6823
23.0557	119.407	23.2604	49.7038	83.0104	15.0532	62.3527	72.5505
23.6652	92.6847	21.5613	51.0423	61.4851	15.6881	56.0805	85.4741
31.1814	106.451	19.4009	50.1363	74.3694	17.5329	81.5109	87.1572
36.8633	107.458	18.7664	50.7589	66.69	19.754	87.948	95.2991
29.9895	92.0095	14.2181	65.0754	80.4222	17.9548	62.9947	123.043
16.2976	115.048	13.9855	64.1146	73.1573	13.0465	63.2057	91.0316
