# Supplementary material for: UBR-1 deficiency leads to ivermectin resistance in Caenorhabditis elegans
Source: eLife journal article supplement (doi:10.7554/elife.103718), 2024-12-13
Supplement: data1 [file Figure 3-source data 5(F).xlsx]

## Sheet: Sheet1
		ubr-1;+UBR-1
WT	ubr-1	Pubr-1	Pmyo-2	Prgef-1	Pmyo-3
48	98	84	60	68	76
60	90	92	50	80	74
42	96	74	64	70	84
56	100	86	60	84	80
54	96	80		80	84
