# Supplementary material for: UBR-1 deficiency leads to ivermectin resistance in Caenorhabditis elegans
Source: eLife journal article supplement (doi:10.7554/elife.103718), 2024-12-13
Supplement: data1 [file Figure 3-source data 7(H).xlsx]

## Sheet: Sheet1
		ubr-1;+UBR-1
WT	ubr-1	Pubr-1	Pmyo-2	Prgef-1	Pmyo-3
19	171	104	39	84	63
20	164	105	34	81	72
20	161	142	30	155	78
40	180	137	31	132	65
41	138	130	38	107	57
41	123	124	43	123	67
48	154	111	45	120	48
18	137	101	38	117	52
11	148	157	13	96	57
49	161	101	29	130	56
41	151	141	27	72	43
29	141	120	37	125	55
21	150	141	30	137	90
55	157	139	34	132	63
53	134	93	26	118	60
56	124	114	33	69	55
21	163	104	41	110	82
7	119	136	29	105	83
59	137	128	43	96	99
43	142	174	39	84	78
24	153	157	31	88	65
51	180	148	23	123	88
49	174	100	27	136	52
23	171	94	35	118	40
34	160	153	27	122	112
48	163	136	26	134	87
7	175	145	40	117	50
30	155	133	47	97	78
33	154	165	31	129	75
47	146	142	40	132	64
