# Supplementary material for: UBR-1 deficiency leads to ivermectin resistance in Caenorhabditis elegans
Source: eLife journal article supplement (doi:10.7554/elife.103718), 2024-12-13
Supplement: data1 [file Figure 3-source data 8(I).xlsx]

## Sheet: Sheet1
		ubr-1;+UBR-1
WT	ubr-1	Pubr-1	Pmyo-2	Prgef-1	Pmyo-3
18.4817	101.494	16.0293	18.6075	14.7587	15.4703
19.2872	125.042	17.9661	27.0867	24.6578	14.269
21.0046	115.516	16.4027	18.9741	24.1816	14.4462
18.0238	108.941	35.6662	28.0921	23.0351	16.0934
23.0557	119.407	28.5102	21.6726	34.5748	18.2279
23.6652	92.6847	22.4139	41.0876	35.6955	12.7488
31.1814	106.451	22.3743	31.9704	13.9713	19.2809
36.8633	107.458	23.9484	20.7393	27.757	14.6546
29.9895	92.0095	33.62	23.7037	12.9057	8.44627
16.2976	115.048	20.5816	23.5966	23.4181	15.5716
