# Supplementary material for: UBR-1 deficiency leads to ivermectin resistance in Caenorhabditis elegans
Source: eLife journal article supplement (doi:10.7554/elife.103718), 2024-12-13
Supplement: data1 [file Figure 4-figure supplement 1-source data2(B).xlsx]

## Sheet: Sheet1
AVR-15::GFP			AVR-14::GFP			GLC-1::GFP
WT	ubr-1		WT	ubr-1		WT	ubr-1
1.19221	0.281782		0.894784	0.86672		1.02978	0.807019
1.18537	0.252367		0.880387	1.02225		0.982289	0.688908
1.14539	0.290811		0.933189	0.780797		1.45719	0.474133
1.16237	0.701548		0.94533	0.805262		0.961811	0.676614
1.13653	0.359229		1.06164	0.887699		0.835357	0.35816
1.0795	0.50786		1.09143	0.525194		0.69814	0.511905
0.499845	0.577517		0.796105	0.689021		0.805487	0.515049
0.921669	0.544472		0.875672	0.72861		0.819757	0.373034
0.839856	0.529234		1.23251	0.680592		0.509808	0.565316
0.727298	0.521318		1.29107	0.687973		0.828544	0.42181
1.08035	0.712761
1.02961	0.200324
	0.308362
	0.364702
	0.646369
	0.788384
	0.72738
	0.677956
	0.795734
