# Supplementary material for: UBR-1 deficiency leads to ivermectin resistance in Caenorhabditis elegans
Source: eLife journal article supplement (doi:10.7554/elife.103718), 2024-12-13
Supplement: data1 [file Figure 4-figure supplement 1-source data3(C).xlsx]

## Sheet: Sheet1
avr-15			avr-14			glc-1
WT	ubr-1		WT	ubr-1		WT	ubr-1
1.12464	0.972465		1.04401	0.595849		1.12837	1.02187
1.11827	1.13994		0.996238	1.06449		0.748905	1.21572
0.757097	0.834879		0.959752	1.00154		1.12273	0.740409
