# Supplementary material for: UBR-1 deficiency leads to ivermectin resistance in Caenorhabditis elegans
Source: eLife journal article supplement (doi:10.7554/elife.103718), 2024-12-13
Supplement: data1 [file Figure 4-figure supplement 1-source data4(D).xlsx]

## Sheet: Sheet1
WT	WT;+AVR-15	ubr-1	ubr-1;+AVR-15
50	60	100	84
54	54	96	80
44	50	98	92
50	50	100	90
52	48	98	92
