# Supplementary material for: UBR-1 deficiency leads to ivermectin resistance in Caenorhabditis elegans
Source: eLife journal article supplement (doi:10.7554/elife.103718), 2024-12-13
Supplement: data1 [file Figure 4-figure supplement 1-source data5(E).xlsx]

## Sheet: Sheet1
	WT						ubr-1						avr-14;avr-15;glc-1
IVM	50	54	44	50	52		100	96	98	100	98		100	98	100	100	98
IVM+Cef	44	44	50	52	48		52	54	54	48	60		100	100	100	98	100
