# Supplementary material for: UBR-1 deficiency leads to ivermectin resistance in Caenorhabditis elegans
Source: eLife journal article supplement (doi:10.7554/elife.103718), 2024-12-13
Supplement: data1 [file Figure 4-figure supplement 2-source data2(B).xlsx]

## Sheet: Sheet1
WT	ubr-1
33	34
26	35
26	28
28	36
42	36
