# Supplementary material for: UBR-1 deficiency leads to ivermectin resistance in Caenorhabditis elegans
Source: eLife journal article supplement (doi:10.7554/elife.103718), 2024-12-13
Supplement: data1 [file Figure 4-figure supplement 2-source data3(C).xlsx]

## Sheet: Sheet1
WT	ubr-1
36.1314	38.584
41.4906	33.9992
34.7031	32.3806
53.0893	38.3786
39.5977	48.2597
