# Supplementary material for: UBR-1 deficiency leads to ivermectin resistance in Caenorhabditis elegans
Source: eLife journal article supplement (doi:10.7554/elife.103718), 2024-12-13
Supplement: data1 [file Figure 4-figure supplement 2-source data5(E).xlsx]

## Sheet: Sheet1
WT	ubr-1
34	36
27	33
34	29
37	32
35	37
