# Supplementary material for: UBR-1 deficiency leads to ivermectin resistance in Caenorhabditis elegans
Source: eLife journal article supplement (doi:10.7554/elife.103718), 2024-12-13
Supplement: data1 [file Figure 4-figure supplement 2-source data6(F).xlsx]

## Sheet: Sheet1
WT	ubr-1
41.9365	39.6518
50.071	51.2604
50.5732	35.8953
41.5057	51.3876
60.1521	47.5192
