# Supplementary material for: UBR-1 deficiency leads to ivermectin resistance in Caenorhabditis elegans
Source: eLife journal article supplement (doi:10.7554/elife.103718), 2024-12-13
Supplement: data1 [file Figure 5-source data 1(A).xlsx]

## Sheet: Sheet1
WT 0mM 5-HT						WT 20mM 5-HT
1.01486	1.14935	1.26575	1.26859	1.11092		1.05865	1.37839	1.07238	1.6054	1.04481
1.0231	1.14731	1.26224	1.26432	1.10488		1.05989	1.48285	1.11063	1.65268	1.0252
1.01612	1.14861	1.26116	1.28814	1.11305		1.06648	1.39477	1.06167	1.64142	1.05343
1.02178	1.14665	1.28043	1.2732	1.10657		1.07726	1.43839	1.1142	1.66034	1.05357
1.02725	1.14822	1.27845	1.2996	1.11302		1.0778	1.3785	1.08754	1.65223	1.01693
1.0195	1.14633	1.27497	1.25691	1.11213		1.0791	1.44553	1.0923	1.64943	1.04704
1.01759	1.14463	1.27174	1.26643	1.11158		1.07931	1.53898	1.10743	1.63373	1.0921
1.01523	1.14723	1.26509	1.24901	1.11597		1.08277	1.36441	1.09214	1.6413	1.08323
1.01844	1.14802	1.27179	1.26584	1.11776		1.08266	1.38657	1.11443	1.63516	1.06827
1.02333	1.14795	1.27191	1.29005	1.11438		1.09416	1.47879	1.10818	1.60259	1.07999
1.01751	1.14723	1.26632	1.27613	1.11185		1.10082	1.54558	1.14642	1.59819	1.02226
1.02882	1.14469	1.27351	1.28363	1.11741		1.09185	1.4561	1.13736	1.61139	1.00859
1.02579	1.14665	1.27046	1.27623	1.11254		1.09767	1.31872	1.0888	1.59351	1.00534
1.02029	1.14728	1.26604	1.26041	1.11568		1.08767	1.45862	1.08379	1.59031	1.0103
1.02053	1.14688	1.26266	1.25318	1.11257		1.0892	1.42962	1.09935	1.58709	1.02896
1.01865	1.14472	1.26295	1.26554	1.12167		1.09859	1.44251	1.1651	1.60765	1.05685
1.02119	1.14629	1.26667	1.24392	1.11996		1.09681	1.45535	1.22335	1.61387	1.04305
1.02354	1.14487	1.27057	1.28374	1.11593		1.08726	1.42654	1.22713	1.61029	1.042
1.02017	1.14349	1.27448	1.24775	1.11917		1.09632	1.31634	1.26888	1.58155	1.05255
1.01387	1.14504	1.27131	1.24301	1.12414		1.09613	1.35219	1.3077	1.57955	1.02103
1.0232	1.1474	1.28191	1.24838	1.11485		1.07914	1.43901	1.23477	1.57984	1.02294
1.01403	1.14605	1.28626	1.28175	1.12065		1.07986	1.39362	1.22592	1.57114	1.0411
1.01779	1.14414	1.28296	1.2758	1.12017		1.08041	1.40456	1.25034	1.60781	1.01802
1.01168	1.14514	1.28173	1.22607	1.11454		1.08525	1.3974	1.20511	1.59612	1.01559
1.01271	1.14275	1.28077	1.26724	1.11385		1.08035	1.43148	1.19948	1.56406	1
1.01793	1.14433	1.28318	1.24849	1.10973		1.08033	1.44265	1.2255	1.5733	1.03302
1.01737	1.14746	1.28893	1.28734	1.11867		1.07695	1.42647	1.32203	1.56642	1.0354
1.01108	1.14725	1.28159	1.28019	1.10992		1.07451	1.4206	1.30067	1.55429	1.01757
1.02153	1.14665	1.2936	1.27265	1.1071		1.07126	1.39992	1.424	1.57705	1.00686
1.02055	1.1461	1.28198	1.24979	1.10902		1.068	1.40982	1.4359	1.54909	1.03462
1.0222	1.14609	1.27837	1.28941	1.10191		1.08865	1.43431	1.44892	1.56164	1.03686
1.02336	1.14657	1.28243	1.26006	1.10756		1.0921	1.41042	1.53206	1.5647	1.0556
1.02458	1.14658	1.28859	1.27133	1.10918		1.07106	1.39544	1.49082	1.53185	1.03879
1.03133	1.14813	1.28175	1.2541	1.11042		1.0692	1.43447	1.41154	1.53869	1.04752
1.01585	1.14589	1.27884	1.24643	1.11454		1.06937	1.42186	1.54376	1.55557	1.04794
1.02123	1.14518	1.2799	1.26073	1.10573		1.06455	1.36553	1.38667	1.56998	1.08326
1.02643	1.14773	1.2797	1.24886	1.10496		1.07257	1.2609	1.37454	1.56859	1.0424
1.02396	1.14464	1.28045	1.24252	1.10327		1.0704	1.39446	1.39993	1.5829	1.04523
1.02476	1.14497	1.27155	1.27001	1.09887		1.08366	1.35752	1.35583	1.5678	1.06233
1.0218	1.14644	1.28659	1.29036	1.1079		1.08076	1.37857	1.33546	1.56508	1.01789
1.01769	1.14441	1.27933	1.25094	1.10598		1.07965	1.36135	1.29523	1.56501	1.05742
1.0281	1.14455	1.28201	1.25979	1.10712		1.06407	1.38023	1.27873	1.56695	1.02875
1.03045	1.14264	1.27352	1.27898	1.10655		1.0539	1.31857	1.22668	1.553	1.03689
1.02369	1.14405	1.26404	1.29914	1.10146		1.04858	1.28706	1.24502	1.53477	1.02819
1.02354	1.14425	1.27624	1.24614	1.10679		1.04934	1.27778	1.27914	1.54334	1.06058
1.02008	1.14482	1.27435	1.28714	1.10174		1.05862	1.30398	1.34283	1.53666	1.05045
1.02083	1.14406	1.27939	1.25027	1.10191		1.06635	1.24727	1.42332	1.54655	1.05684
1.02521	1.14485	1.28618	1.22551	1.10405		1.06546	1.29139	1.38442	1.52674	1.05181
1.0245	1.14318	1.30708	1.28152	1.10485		1.06083	1.12636	1.49199	1.5361	1.08966
1.01744	1.14523	1.31229	1.28279	1.09909		1.05325	1.19225	1.45081	1.51598	1.02479
1.02346	1.14376	1.31987	1.23355	1.09861		1.05704	1.25819	1.45914	1.53828	1.03383
1.02383	1.14394	1.31548	1.26606	1.10722		1.07014	1.24867	1.4288	1.54424	1.07905
1.02262	1.14532	1.30927	1.25243	1.10957		1.07694	1.32033	1.42924	1.581	1.06215
1.02263	1.14425	1.31593	1.25872	1.10308		1.06766	1.2634	1.4402	1.57126	1.02866
1.02425	1.14206	1.31267	1.26186	1.10761		1.06187	1.26335	1.45202	1.5658	1.0306
1.02098	1.14196	1.30102	1.24465	1.10163		1.0602	1.34604	1.40208	1.58416	1.06038
1.02647	1.1433	1.30676	1.21651	1.11196		1.05818	1.26772	1.3764	1.55376	1.04747
1.00946	1.14067	1.30624	1.23402	1.11149		1.05994	1.37911	1.34631	1.58262	1.03796
1.01789	1.1387	1.28889	1.23027	1.10496		1.06027	1.28055	1.32728	1.56076	1.04487
1.01975	1.14278	1.29699	1.25477	1.10843		1.06271	1.2742	1.24247	1.53956	1.08505
1.01953	1.14013	1.28652	1.20612	1.11126		1.06367	1.28664	1.30032	1.06644	1.0518
1.01715	1.14213	1.28751	1.2346	1.10464		1.06716	1.24705	1.24336	1.03328	1.06565
1.01792	1.14056	1.29309	1.24476	1.10546		1.06421	1.30167	1.18768	1	1.08154
1.02052	1.14042	1.27666	1.24602	1.10437		1.05943	1.2829	1.20867	1.20714	1.05343
1.01499	1.13948	1.28538	1.26823	1.11087		1.05123	1.19599	1.22357	1.37671	1.10886
1.03197	1.14183	1.27954	1.25059	1.10712		1.05345	1.19865	1.16274	1.31528	1.07749
1.02161	1.14258	1.29049	1.26435	1.11128		1.06126	1.22844	1.16467	1.34172	1.06374
1.01703	1.14062	1.28272	1.26184	1.09785		1.06202	1.31501	1.14658	1.32647	1.0521
1.01282	1.14203	1.28216	1.25705	1.10887		1.05409	1.30343	1.15349	1.32615	1.05991
1.01746	1.14072	1.28175	1.20877	1.10793		1.06458	1.24174	1.14037	1.3402	1.06184
1.03072	1.1399	1.28063	1.26094	1.11067		1.06459	1.1837	1.14002	1.34916	1.09009
1.01579	1.14002	1.28079	1.25122	1.10389		1.07126	1.20117	1.1684	1.369	1.08736
1.02097	1.14068	1.28305	1.24988	1.10801		1.07026	1.13202	1.15605	1.40823	1.06259
1.02243	1.14151	1.27803	1.24066	1.1053		1.06252	1.18789	1.12883	1.3941	1.06398
1.01506	1.13973	1.27944	1.26353	1.10213		1.0584	1.15115	1.15888	1.39016	1.06951
1.03026	1.1448	1.28522	1.23467	1.10186		1.05495	1.20126	1.12591	1.40286	1.08597
1.01841	1.14143	1.28221	1.23979	1.10496		1.06419	1.2465	1.09192	1.40784	1.06179
1.01704	1.14067	1.27724	1.24896	1.10453		1.07471	1.17561	1.10932	1.35714	1.06206
1.01831	1.14225	1.27915	1.24303	1.10841		1.06789	1.19204	1.11542	1.36896	1.03549
1.02275	1.14015	1.27402	1.26384	1.10457		1.0608	1.15155	1.10806	1.3613	1.05903
1.02777	1.14102	1.274	1.2461	1.10408		1.0524	1.23778	1.08664	1.37452	1.07677
1.01266	1.14046	1.28225	1.23271	1.09708		1.05541	1.20886	1.11218	1.39175	1.0448
1.02221	1.14093	1.29461	1.25998	1.10431		1.05038	1.16976	1.12044	1.41592	1.06472
1.02019	1.14223	1.28932	1.25204	1.1045		1.05218	1.18233	1.0886	1.33459	1.0547
1.02626	1.13916	1.28551	1.26036	1.10947		1.05774	1.11779	1.08583	1.38353	1.0664
1.01944	1.14247	1.29114	1.2391	1.10646		1.05203	1.16123	1.13473	1.40764	1.0934
1.01823	1.14148	1.29371	1.23338	1.10642		1.05911	1.15854	1.12482	1.44487	1.07378
1.02153	1.14094	1.29249	1.23197	1.09988		1.06059	1.20054	1.10736	1.36634	1.06397
1.01752	1.13905	1.29906	1.19442	1.10496		1.04427	1.20999	1.07547	1.32823	1.04945
1.01738	1.13988	1.28126	1.26136	1.09881		1.06575	1.2296	1.09276	1.34918	1.04695
1.02105	1.13834	1.29137	1.24054	1.10826		1.06341	1.18907	1.11741	1.36651	1.09188
1.02468	1.13941	1.28544	1.22436	1.10134		1.06911	1.21314	1.10143	1.38502	1.13122
1.02699	1.14121	1.2778	1.24722	1.10003		1.06741	1.15879	1.0999	1.3363	1.10353
1.02664	1.13823	1.28274	1.24292	1.09722		1.06013	1.09381	1.09393	1.36229	1.07755
1.01295	1.1379	1.27998	1.22395	1.09988		1.05356	1.08584	1.06892	1.34513	1.09367
1.02109	1.13995	1.2756	1.23251	1.09892		1.05239	1.14282	1.10746	1.28802	1.10245
1.01353	1.13919	1.28645	1.22074	1.10053		1.06236	1.05732	1.09716	1.29007	1.07546
1.02295	1.13815	1.28006	1.25188	1.09671		1.07455	1.09622	1.09793	1.33875	1.10256
1.01639	1.14026	1.2779	1.21246	1.09935		1.07422	1.03246	1.06553	1.28184	1.09574
1.02648	1.13908	1.28139	1.18868	1.10315		1.0801	1.17849	1.10813	1.33443	1.09604
1.01932	1.13769	1.27068	1.26257	1.0987		1.07847	1.09038	1.06606	1.2652	1.0727
1.01381	1.13888	1.2728	1.22505	1.098		1.06953	1.06312	1.06503	1.27459	1.07586
1.02042	1.13732	1.27618	1.2291	1.0981		1.06076	1.13914	1.08234	1.26594	1.08874
1.02194	1.13979	1.26604	1.22705	1.10134		1.06695	1.04615	1.06914	1.29737	1.08405
1.01603	1.13845	1.27463	1.22812	1.1015		1.07733	1.17855	1.07253	1.26964	1.06585
1.0287	1.13843	1.2811	1.21214	1.09216		1.06617	1.11442	1.11	1.24134	1.07106
1.02112	1.1385	1.28165	1.22493	1.09235		1.06313	1.12895	1.05146	1.24642	1.10314
1.02079	1.13789	1.28712	1.22956	1.0917		1.06665	1.14318	1.0906	1.23155	1.11663
1.01129	1.137	1.28645	1.23708	1.10521		1.06389	1.13916	1.10687	1.28989	1.08396
1.02505	1.13732	1.2826	1.17717	1.09999		1.05992	1.10302	1.05083	1.27336	1.15325
1.01386	1.13675	1.27528	1.21698	1.09996		1.07043	1.12718	1.06198	1.23567	1.09119
1.01711	1.13766	1.27731	1.22733	1.09295		1.07008	1.17653	1.11902	1.29661	1.08461
1.02349	1.13636	1.26987	1.20985	1.09444		1.06499	1.15172	1.06178	1.24441	1.11451
1.01702	1.13636	1.27061	1.23178	1.09611		1.0595	1.05459	1.10166	1.263	1.08616
1.01549	1.13634	1.25602	1.20618	1.09608		1.06065	1.12158	1.08633	1.28799	1.12195
1.0183	1.13761	1.27014	1.21366	1.10075		1.05971	1.11976	1.08711	1.26871	1.08801
1.00888	1.13828	1.27477	1.22209	1.08851		1.05406	1.1541	1.0887	1.25441	1.10224
1.02459	1.134	1.27871	1.20558	1.09455		1.05107	1.09336	1.05472	1.25855	1.11211
1.02626	1.13351	1.26724	1.20393	1.09759		1.06077	1.15372	1.07302	1.22864	1.09271
1.00388	1.1357	1.27923	1.20866	1.09426		1.07457	1.12134	1.08546	1.22623	1.10896
1.01543	1.13529	1.28105	1.21558	1.09071		1.07121	1.17064	1.06087	1.26322	1.09777
1.0134	1.13466	1.28582	1.2492	1.10206		1.06853	1.18571	1.09588	1.24714	1.0704
1.02095	1.13678	1.29329	1.21567	1.09074		1.05709	1.07719	1.08769	1.29239	1.0746
1.02416	1.13809	1.2878	1.24089	1.09221		1.06024	1.13986	1.06504	1.30502	1.08816
1.01406	1.13797	1.28964	1.22218	1.09078		1.06514	1.18707	1.12472	1.28232	1.10586
1.02209	1.13731	1.29665	1.20127	1.09085		1.0578	1.13778	1.08199	1.32061	1.07242
1.023	1.1382	1.30038	1.21356	1.0994		1.05967	1.14846	1.07365	1.28479	1.09972
1.01845	1.13641	1.29808	1.18971	1.09323		1.0574	1.07641	1.05578	1.29468	1.05778
1.02389	1.13721	1.29585	1.22426	1.09274		1.05438	1.20858	1.08289	1.23623	1.0777
1.01474	1.13787	1.29716	1.21468	1.09208		1.03839	1.11888	1.07011	1.24889	1.12832
1.01747	1.13455	1.29181	1.23713	1.09241		1.04362	1.10654	1.08342	1.28808	1.07726
1.02693	1.13543	1.28898	1.22995	1.086		1.03967	1.12182	1.11014	1.24121	1.08686
1.01516	1.13466	1.2902	1.23918	1.08678		1.04026	1.10563	1.05696	1.26521	1.07757
1.02823	1.13502	1.27998	1.24111	1.08635		1.04127	1.20771	1.07235	1.27958	1.08923
1.01963	1.13613	1.28842	1.21274	1.09881		1.0488	1.10655	1.08125	1.29298	1.08444
1.02615	1.13593	1.29783	1.2195	1.08651		1.04784	1.16361	1.05899	1.31828	1.08716
1.03002	1.13503	1.29126	1.21056	1.08452		1.0669	1.13872	1.071	1.28599	1.08708
1.02138	1.13664	1.29162	1.2598	1.08542		1.05858	1.1639	1.06587	1.29908	1.10451
1.01795	1.13445	1.28849	1.23995	1.08886		1.055	1.08662	1.09441	1.2708	1.13026
1.0174	1.13218	1.27681	1.25048	1.09779		1.06132	1.08005	1.03951	1.28675	1.11793
1.02117	1.1355	1.27475	1.23164	1.07914		1.05055	1.0893	1.08399	1.29809	1.13586
1.02087	1.13557	1.2863	1.23258	1.08904		1.05137	1.08643	1.05487	1.28443	1.1314
1.02566	1.13186	1.2863	1.24239	1.09805		1.04984	1.19729	1.08429	1.31265	1.11459
1.02567	1.13274	1.27936	1.22047	1.09625		1.04372	1.16107	1.04364	1.30304	1.10267
1.03081	1.13421	1.28891	1.24051	1.08675		1.05164	1.0978	1.08711	1.30669	1.16838
1.01998	1.13398	1.28611	1.2019	1.09459		1.05555	1.15	1.09746	1.29195	1.11848
1.02542	1.13153	1.29264	1.22347	1.09089		1.05089	1.07239	1.09745	1.3265	1.08708
1.02478	1.13386	1.29811	1.23383	1.09493		1.05968	1.09336	1.04667	1.32032	1.11341
1.02452	1.13414	1.28839	1.1689	1.08747		1.0494	1.16653	1.02648	1.34177	1.11433
1.01816	1.13179	1.29754	1.2484	1.09115		1.05528	1.04493	1.0554	1.36227	1.11796
1.02103	1.12803	1.31031	1.21887	1.08892		1.05521	1.18545	1.07833	1.29455	1.1346
1.02109	1.13183	1.30964	1.26265	1.09346		1.05785	1.07793	1.08449	1.31085	1.1554
1.01004	1.13164	1.30488	1.23052	1.09091		1.05658	1.00409	1.04395	1.33511	1.12564
1.01535	1.13206	1.30357	1.22105	1.08246		1.05132	1.01777	1.07101	1.32993	1.132
1.01527	1.13265	1.29875	1.22107	1.0872		1.04964	1	1.10439	1.33729	1.17029
1.02238	1.13477	1.32818	1.22825	1.08737		1.04499	1.01255	1.04719	1.36955	1.17141
1.02573	1.13236	1.32884	1.23749	1.08773		1.04175	1.18707	1.09574	1.32593	1.1469
1.02029	1.1314	1.32817	1.20214	1.08201		1.03779	1.06815	1.06722	1.35678	1.1472
1.02092	1.12986	1.32361	1.1966	1.09481		1.03946	1.13846	1.08284	1.36141	1.16169
1.01728	1.12948	1.32378	1.22287	1.08691		1.04782	1.04462	1.07855	1.33513	1.17807
1.02874	1.13212	1.32627	1.20148	1.09039		1.05468	1.07368	1.05265	1.37376	1.13784
1.02186	1.13516	1.31355	1.20679	1.0857		1.04951	1.06419	1.08145	1.34845	1.16991
1.03515	1.13493	1.31432	1.19329	1.09372		1.04924	1.10954	1.05889	1.36366	1.17509
1.02286	1.13259	1.32277	1.18514	1.09641		1.04458	1.06344	1.05944	1.35317	1.15121
1.01138	1.13036	1.33454	1.22361	1.09442		1.04453	1.12963	1.07155	1.38136	1.17445
1.01444	1.13269	1.32352	1.25478	1.09224		1.03975	1.07064	1.0406	1.36606	1.16613
1.02122	1.12989	1.32826	1.20045	1.0987		1.0399	1.08484	1.07884	1.3984	1.17894
1.01918	1.12891	1.32917	1.19338	1.09905		1.05626	1.05192	1.08915	1.35372	1.16053
1.01704	1.13058	1.33472	1.1877	1.10191		1.0577	1.08355	1.06626	1.39891	1.17616
1.02647	1.12863	1.32667	1.1894	1.09859		1.0598	1.15007	1.08067	1.4324	1.17798
1.01841	1.13141	1.32181	1.24143	1.09579		1.06897	1.16605	1.06945	1.42534	1.17282
1.02178	1.13002	1.32211	1.16773	1.10162		1.06718	1.1169	1.05952	1.40155	1.15658
1.02011	1.12819	1.31565	1.18335	1.09346		1.05852	1.17736	1.07868	1.39743	1.19303
1.01879	1.13113	1.31436	1.1868	1.09816		1.05167	1.15161	1.03019	1.4022	1.20001
1.02028	1.13095	1.31204	1.17679	1.09904		1.05892	1.16822	1.10588	1.33459	1.20737
1.0239	1.1289	1.30365	1.21454	1.09934		1.056	1.15249	1.05217	1.37592	1.2371
1.02272	1.12717	1.31029	1.19094	1.09661		1.04727	1.18427	1.05001	1.48145	1.21059
1.02069	1.12714	1.31497	1.22048	1.10672		1.05167	1.21803	1.04817	1.48143	1.23552
1.02052	1.12703	1.31776	1.20761	1.09515		1.04239	1.17954	1.07973	1.41642	1.1913
1.02219	1.12921	1.31495	1.18923	1.09201		1.03006	1.2868	1.03933	1.39464	1.21899
1.01501	1.12958	1.31829	1.20822	1.10013		1.03764	1.26896	1.06736	1.4144	1.17585
1.02231	1.13064	1.30754	1.20398	1.09925		1.04472	1.23591	1.07586	1.38193	1.21257
1.01883	1.12762	1.30069	1.19177	1.09449		1.0407	1.25414	1.05726	1.40429	1.22409
1.02699	1.12921	1.3031	1.23002	1.10382		1.03918	1.22765	1.05947	1.44353	1.20741
1.03149	1.12789	1.30052	1.2105	1.09889		1.04013	1.19305	1.06017	1.42269	1.21993
1.02565	1.12826	1.30456	1.20516	1.10446		1.036	1.25903	1.04725	1.44035	1.27441
1.02686	1.12805	1.30052	1.22084	1.10836		1.03982	1.20381	1.08355	1.44476	1.29479
1.02064	1.12834	1.30873	1.21948	1.10125		1.03569	1.24745	1.0439	1.41231	1.24742
1.02289	1.12838	1.30193	1.21468	1.10697		1.02621	1.27649	1.04231	1.46531	1.21246
1.02017	1.12895	1.3088	1.22748	1.10156		1.02089	1.25686	1.07371	1.47923	1.20831
1.0273	1.12832	1.30795	1.22797	1.09658		1.02358	1.29561	1.08981	1.43563	1.26027
1.01953	1.1276	1.31625	1.21979	1.10196		1.01696	1.28736	1.03268	1.5026	1.2237
1.01641	1.12759	1.30903	1.21501	1.09925		1.02665	1.27754	1.0336	1.44262	1.20053
1.02103	1.12808	1.29631	1.20093	1.09435		1.03535	1.2989	1.05776	1.47328	1.22619
1.01388	1.12838	1.30193	1.18034	1.0969		1.0456	1.24845	1.05326	1.43929	1.25631
1.02762	1.12829	1.29926	1.22224	1.0977		1.04529	1.27926	1.02812	1.51605	1.26825
1.01678	1.12961	1.2966	1.18684	1.09781		1.03762	1.35181	1.04512	1.48486	1.24773
1.02359	1.12784	1.29505	1.22195	1.09684		1.03429	1.30566	1.06256	1.4597	1.22298
1.02346	1.12683	1.29053	1.20404	1.0996		1.03238	1.25376	1.0412	1.48683	1.23956
1.02647	1.12539	1.29523	1.23903	1.09318		1.03205	1.25585	1.06083	1.45389	1.24389
1.02353	1.12485	1.29418	1.19687	1.09354		1.03383	1.27616	1.07205	1.49074	1.23177
1.02144	1.12672	1.30184	1.1856	1.0967		1.01614	1.27012	1.03514	1.50088	1.21905
1.02002	1.12574	1.3017	1.20292	1.09724		1.03089	1.34317	1.04252	1.4381	1.20113
1.03071	1.12729	1.29895	1.18212	1.09031		1.04316	1.33522	1.07452	1.48826	1.2386
1.01206	1.12657	1.29155	1.19701	1.08921		1.03704	1.37069	1.05786	1.49155	1.25117
1.01349	1.12559	1.29566	1.21033	1.10139		1.02605	1.28704	1.02582	1.49334	1.25371
1.02198	1.12475	1.29424	1.21377	1.09638		1.03924	1.29058	1.05681	1.44845	1.26898
1.01692	1.12627	1.28635	1.20422	1.09415		1.03692	1.35349	1.01731	1.54691	1.23659
1.02258	1.12429	1.28667	1.21109	1.09045		1.04081	1.35012	1.01196	1.52358	1.27701
1.02381	1.12477	1.2876	1.20057	1.09069		1.03222	1.4243	1.03131	1.52337	1.29142
1.02944	1.12555	1.27908	1.22985	1.09295		1.02259	1.40887	1.04962	1.504	1.32985
1.02303	1.12581	1.28701	1.20382	1.0856		1.01619	1.2971	1.02496	1.56983	1.3169
1.017	1.12505	1.28747	1.18671	1.08584		1.02361	1.39368	1.04386	1.52566	1.27805
1.01967	1.1237	1.28696	1.22386	1.08488		1.02029	1.4563	1.04947	1.51536	1.28602
1.02137	1.1239	1.29026	1.2142	1.1003		1.02219	1.35928	1.03537	1.52432	1.28726
1.02294	1.12498	1.28824	1.21152	1.08885		1.0247	1.34706	1.03043	1.53526	1.2628
1.01618	1.1256	1.28294	1.18764	1.0859		1.03017	1.336	1.03615	1.56322	1.28674
1.02103	1.1235	1.28523	1.20206	1.08591		1.03092	1.32243	1.03059	1.52245	1.2486
1.01966	1.12317	1.29346	1.22781	1.09465		1.02762	1.32764	1	1.57346	1.27944
1.01221	1.12385	1.29561	1.17383	1.09111		1.02202	1.29228	1.03979	1.59932	1.27139
1.01977	1.12292	1.28961	1.17497	1.08725		1.0249	1.33957	1.02513	1.50411	1.25724
1.013	1.12459	1.28712	1.17935	1.08819		1.03944	1.28078	1.05771	1.58424	1.26937
1.02011	1.12358	1.28726	1.19148	1.08272		1.02848	1.2719	1.05199	1.54711	1.26814
1.01591	1.12266	1.28175	1.19569	1.08972		1.02483	1.37341	1.06112	1.56821	1.27034
1.02269	1.12335	1.27894	1.18697	1.08706		1.0337	1.29762	1.05476	1.61861	1.30221
1.02274	1.12263	1.28156	1.2217	1.10231		1.03292	1.32027	1.01896	1.61441	1.3078
1.02586	1.12211	1.28871	1.22359	1.1136		1.03012	1.35573	1.03536	1.60385	1.28724
1.01678	1.12241	1.29043	1.18372	1.11947		1.03395	1.27018	1.06451	1.66488	1.3119
1.01708	1.12173	1.30218	1.13999	1.12123		1.03105	1.30265	1.06349	1.53224	1.30526
1.01982	1.1222	1.29438	1.18045	1.12471		1.02289	1.29652	1.0527	1.60344	1.3231
1.02022	1.12206	1.29935	1.22281	1.11982		1.01774	1.27148	1.00778	1.6705	1.33055
1.02121	1.12306	1.29173	1.21232	1.12131		1.01702	1.33393	1.04966	1.61417	1.29175
1.02036	1.12284	1.30834	1.20806	1.12092		1.01892	1.22624	1.04301	1.59898	1.29902
1.02846	1.11996	1.31495	1.16558	1.12521		1.01149	1.31732	1.03846	1.61067	1.30517
1.0211	1.12117	1.31839	1.19064	1.11632		1.022	1.22809	1.01233	1.53886	1.32829
1.02403	1.12268	1.30764	1.19447	1.1145		1.02429	1.33963	1.05545	1.60531	1.30198
1.02325	1.12296	1.30636	1.19735	1.11644		1.01725	1.2672	1.01765	1.62667	1.31273
1.02099	1.12352	1.31167	1.14797	1.12135		1.00375	1.28215	1.03972	1.55702	1.33606
1.02758	1.12125	1.30898	1.21619	1.11184		1	1.21683	1.01136	1.64516	1.36623
1.01254	1.12069	1.29599	1.20434	1.11758		1.00406	1.28748	1.06409	1.70142	1.35562
1.02123	1.12196	1.28912	1.20855	1.11051		1.01219	1.28146	1.02156	1.6914	1.34286
1.0292	1.12264	1.2955	1.19799	1.11424		1.01301	1.34876	1.04617	1.66484	1.32514
1.02685	1.12311	1.286	1.18715	1.11743		1.01156	1.23056	1.05309	1.60016	1.38429
1.02183	1.12298	1.28524	1.19343	1.11033		1.00673	1.20443	1.02479	1.64067	1.35882
1.01585	1.12186	1.29474	1.19457	1.11135		1.00811	1.21655	1.03757	1.66669	1.34116
1.02149	1.12253	1.28155	1.17495	1.10813		1.00406	1.1828	1.06333	1.71132	1.41556
1.02191	1.12171	1.28354	1.18468	1.12054		1.00921	1.28784	1.04403	1.68451	1.41388
1.01886	1.12012	1.2855	1.20361	1.12053		1.01028	1.24421	1.02028	1.6263	1.39157
1.01891	1.11905	1.27364	1.16341	1.11538		1.02663	1.20823	1.0279	1.66759	1.35853
1.0215	1.12042	1.26508	1.19928	1.11962		1.03064	1.27943	1.03394	1.73192	1.3591
1.02287	1.12104	1.26055	1.18041	1.11905		1.02907	1.13791	1.04344	1.72221	1.38722
1.03185	1.12006	1.25968	1.15966	1.10627		1.04167	1.17433	1.05153	1.71235	1.36846
1.02773	1.11968	1.2591	1.20052	1.10468		1.04957	1.19249	1.04202	1.67019	1.39486
1.02372	1.12097	1.26099	1.16943	1.10299		1.04086	1.18831	1.04713	1.67078	1.42685
1.01433	1.12086	1.25351	1.18176	1.10696		1.03898	1.1949	1.08857	1.6532	1.40037
1.01784	1.12044	1.25497	1.16283	1.09892		1.02941	1.20475	1.07245	1.7251	1.39293
1.01957	1.12203	1.25516	1.16793	1.12127		1.03191	1.13564	1.04795	1.62194	1.38249
1.02457	1.12165	1.2522	1.20227	1.11595		1.03258	1.1611	1.06524	1.63953	1.3799
1.02042	1.11882	1.25164	1.18671	1.12359		1.03805	1.20159	1.07783	1.68765	1.38594
1.02235	1.12136	1.25432	1.17695	1.12693		1.04017	1.18791	1.05747	1.74737	1.39624
1.01867	1.1207	1.25472	1.15703	1.12911		1.04228	1.09164	1.07562	1.65797	1.40306
1.02803	1.11965	1.25583	1.17275	1.12028		1.05236	1.1347	1.07408	1.72202	1.41585
1.02549	1.12026	1.24933	1.16629	1.11738		1.04873	1.1358	1.08282	1.78034	1.42588
1.01686	1.12113	1.25028	1.11689	1.12304		1.05041	1.2459	1.09139	1.70941	1.43719
1.03148	1.1198	1.25843	1.1892	1.12054		1.05748	1.15909	1.07218	1.7286	1.43617
1.02466	1.11848	1.25713	1.18889	1.11478		1.05967	1.13274	1.09617	1.69536	1.42697
1.02252	1.12132	1.26646	1.15411	1.11536		1.06487	1.12393	1.12112	1.75989	1.51843
1.02271	1.12154	1.25401	1.18506	1.1105		1.07084	1.14493	1.11653	1.7531	1.45716
1.02381	1.11781	1.26075	1.17326	1.11511		1.08076	1.09009	1.11487	1.71273	1.47704
1.02246	1.12018	1.26286	1.2152	1.10189		1.07709	1.14211	1.11659	1.69701	1.50307
1.01774	1.11965	1.25352	1.1891	1.10513		1.08045	1.13592	1.09174	1.70058	1.44236
1.02318	1.11754	1.24968	1.14406	1.10441		1.08492	1.1962	1.12368	1.67281	1.47681
1.0235	1.11687	1.2534	1.14481	1.10792		1.08873	1.1398	1.14048	1.72619	1.47185
1.02558	1.11976	1.24734	1.18881	1.10293		1.09156	1.15267	1.11945	1.74551	1.43943
1.02401	1.12025	1.24021	1.14306	1.10283		1.09968	1.19315	1.10929	1.71687	1.45142
1.02196	1.1162	1.24311	1.17947	1.10122		1.10868	1.1285	1.12131	1.74409	1.47409
1.02104	1.11713	1.24192	1.13474	1.09766		1.11275	1.23801	1.13798	1.76142	1.49082
1.01973	1.11631	1.22884	1.18587	1.10224		1.10111	1.16197	1.15778	1.8122	1.45575
1.02583	1.11625	1.23448	1.09422	1.10008		1.10751	1.21143	1.13388	1.67434	1.4798
1.02278	1.11829	1.22771	1.15611	1.09511		1.12032	1.16772	1.19191	1.83939	1.48118
1.01561	1.11862	1.2294	1.15831	1.0996		1.13423	1.21677	1.16753	1.78237	1.50901
1.02127	1.11671	1.23542	1.15943	1.10635		1.1279	1.25137	1.18435	1.87724	1.51507
1.02333	1.11518	1.23338	1.20392	1.11065		1.13217	1.19344	1.15421	1.74687	1.48853
1.02252	1.1163	1.22466	1.16678	1.0963		1.14017	1.21311	1.21883	1.81152	1.51404
1.02872	1.11684	1.23799	1.19182	1.09862		1.14761	1.2424	1.17635	1.78045	1.54156
1.02513	1.11698	1.22094	1.18164	1.10299		1.14078	1.25755	1.22985	1.84946	1.50083
1.01893	1.11598	1.22866	1.142	1.09349		1.16156	1.18317	1.22625	1.78243	1.52175
1.01199	1.11522	1.23551	1.13366	1.09196		1.16566	1.25038	1.20281	1.77901	1.53534
1.0155	1.11367	1.2364	1.20239	1.09454		1.17274	1.27611	1.2182	1.79058	1.57062
1.02232	1.11612	1.23906	1.19248	1.0956		1.17435	1.26244	1.20304	1.74857	1.4874
1.01618	1.11626	1.2414	1.1583	1.09245		1.18438	1.3353	1.2202	1.91048	1.52152
1.02499	1.11786	1.2405	1.13314	1.09403		1.1871	1.31629	1.24084	1.81645	1.53728
1.0242	1.11664	1.23846	1.17627	1.09141		1.19985	1.41466	1.22442	1.73915	1.53625
1.01969	1.1167	1.25401	1.18049	1.08939		1.20091	1.37256	1.22127	1.87837	1.52673
1.02469	1.11564	1.23784	1.18037	1.09648		1.21745	1.34605	1.28765	1.88978	1.53343
1.02023	1.11515	1.24508	1.14986	1.09321		1.22902	1.31935	1.29896	1.84441	1.57523
1.0105	1.11291	1.25409	1.15617	1.09102		1.2327	1.38621	1.31855	1.92756	1.54078
1.0315	1.11423	1.23865	1.15701	1.0856		1.22431	1.38149	1.27953	1.90145	1.49018
1.01073	1.11309	1.24815	1.16759	1.09189		1.23962	1.33602	1.32689	1.88271	1.55016
1.02889	1.11304	1.2437	1.17976	1.09267		1.25165	1.40345	1.33743	1.87984	1.53988
1.02763	1.11752	1.24679	1.16264	1.0896		1.25839	1.36524	1.31294	2.00514	1.57744
1.02959	1.11716	1.24764	1.16256	1.08935		1.26992	1.48684	1.34765	1.91273	1.54401
1.02023	1.11636	1.25379	1.15773	1.08883		1.28211	1.53394	1.36002	1.93396	1.56814
1.02329	1.11618	1.26502	1.19153	1.08662		1.29765	1.66271	1.36906	1.92846	1.56396
1.024	1.11681	1.27334	1.1795	1.09028		1.30164	1.474	1.36077	1.85394	1.5553
1.02671	1.11595	1.27421	1.16633	1.09681		1.30329	1.64343	1.34723	1.85762	1.5791
1.03128	1.11482	1.28167	1.14283	1.08273		1.31779	1.61	1.3774	1.90207	1.56347
1.01679	1.11582	1.2711	1.15313	1.08689		1.33101	1.58923	1.4101	1.83857	1.56069
1.02767	1.11486	1.27512	1.17111	1.08649		1.34571	1.52288	1.40625	1.91579	1.57738
1.02208	1.11601	1.27295	1.2052	1.09163		1.36261	1.67333	1.40563	1.82719	1.59337
1.01712	1.11233	1.27845	1.11729	1.08477		1.37083	1.76369	1.3722	2.0729	1.60048
1.02965	1.11582	1.26766	1.16075	1.08949		1.38342	1.77792	1.44864	1.93264	1.63212
1.02328	1.11525	1.26119	1.16962	1.08261		1.39738	1.74055	1.41111	1.97317	1.59694
1.01985	1.11284	1.25111	1.15765	1.08403		1.40729	1.7591	1.44568	1.93714	1.59807
1.03028	1.11467	1.25616	1.18291	1.09123		1.41966	1.78225	1.44656	1.97351	1.59672
1.02062	1.11368	1.25276	1.15375	1.09298		1.42154	1.84062	1.44167	1.94746	1.58808
1.03103	1.11104	1.24365	1.11954	1.08484		1.43661	1.81337	1.48175	1.92582	1.58975
1.02196	1.11055	1.24456	1.16858	1.08866		1.454	1.83459	1.4683	1.9363	1.61984
1.02502	1.1113	1.24622	1.15442	1.09153		1.46321	1.90033	1.4723	1.99965	1.59597
1.02109	1.11095	1.23882	1.15289	1.08575		1.47676	1.94193	1.4761	2.13931	1.61784
1.01715	1.11196	1.2456	1.16599	1.08852		1.49405	1.97055	1.52074	1.91713	1.61415
1.02008	1.11405	1.24996	1.16428	1.08588		1.51626	2.00146	1.47699	2.15728	1.63458
1.02227	1.11301	1.23813	1.16646	1.08744		1.53017	2.02318	1.54206	2.06014	1.64091
1.01652	1.11129	1.23223	1.16623	1.08898		1.5414	2.00089	1.52449	2.14261	1.66532
1.02092	1.11248	1.245	1.12022	1.08735		1.54741	1.99931	1.54919	1.99857	1.65006
1.02351	1.11187	1.23966	1.14377	1.09831		1.558	2.1046	1.52821	2.00208	1.61172
1.01822	1.1136	1.25826	1.16343	1.10024		1.56903	2.13048	1.56979	2.17583	1.65496
1.02194	1.11274	1.27974	1.15723	1.09381		1.58978	2.21673	1.60556	2.10185	1.65897
1.02428	1.11238	1.2921	1.13293	1.0947		1.5936	2.11916	1.59001	2.14113	1.6686
1.02295	1.11133	1.2918	1.1514	1.09566		1.61	2.15943	1.62945	2.04613	1.65919
1.01869	1.10988	1.29028	1.1474	1.08473		1.65407	2.0748	1.62006	2.09145	1.71282
1.01899	1.11047	1.28692	1.13384	1.09067		1.65885	2.22985	1.63066	1.99826	1.60662
1.02774	1.10994	1.28533	1.14769	1.08626		1.67158	2.2324	1.71829	2.22929	1.68902
1.0204	1.11139	1.28374	1.14888	1.08633		1.68657	2.24234	1.70429	2.13919	1.66389
1.02009	1.11267	1.27716	1.14861	1.09073		1.68341	2.31331	1.69425	2.09214	1.65678
1.02812	1.11281	1.26874	1.1516	1.08592		1.7034	2.3627	1.75728	2.09787	1.69491
1.02262	1.11211	1.25505	1.16958	1.09277		1.73451	2.29768	1.76437	2.10161	1.66373
1.01649	1.11213	1.25575	1.15925	1.09594		1.74651	2.28746	1.80224	2.11384	1.70418
1.01964	1.11226	1.24528	1.16422	1.09774		1.74786	2.28694	1.80452	2.22103	1.71622
1.02755	1.11154	1.25044	1.15273	1.10186		1.7661	2.32555	1.865	2.16475	1.6949
1.01792	1.11135	1.25165	1.17607	1.09176		1.78058	2.25249	1.83836	2.17902	1.66184
1.0249	1.11165	1.25909	1.13667	1.0938		1.79359	2.35489	1.82736	2.14344	1.70018
1.0231	1.11055	1.24856	1.12267	1.09136		1.80536	2.33691	1.88642	2.09769	1.70488
1.01526	1.11027	1.25497	1.18588	1.09086		1.82404	2.39378	1.92891	2.28799	1.76291
1.02561	1.11109	1.25384	1.13308	1.09377		1.86697	2.42521	1.95667	2.17856	1.76251
1.02886	1.10999	1.253	1.1738	1.08768		1.88514	2.44348	1.96108	2.20071	1.71349
1.02463	1.10946	1.25451	1.17614	1.08617		1.89546	2.47308	1.96213	2.16668	1.73026
1.02372	1.10996	1.24697	1.14901	1.08667		1.90817	2.48593	1.97415	2.30055	1.68358
1.02458	1.10876	1.24101	1.16943	1.08918		1.91988	2.54404	2.02947	2.25972	1.72235
1.01814	1.10907	1.23463	1.16743	1.08207		1.94676	2.53665	2.04998	2.29724	1.7191
1.02863	1.11079	1.24317	1.17321	1.08123		1.94438	2.46741	2.07238	2.26575	1.74275
1.02591	1.11143	1.24858	1.14978	1.0903		1.97295	2.46292	2.14996	2.28178	1.72679
1.02552	1.11047	1.23411	1.16564	1.07481		2.00295	2.30875	2.19931	2.31847	1.74332
1.01769	1.11017	1.24587	1.14552	1.08264		2.04121	2.45995	2.22472	2.35758	1.7394
1.02046	1.11217	1.22951	1.14402	1.08407		2.05686	2.36927	2.2605	2.40603	1.69872
1.03118	1.11163	1.23948	1.16048	1.08201		2.08097	2.50908	2.24085	2.23072	1.70812
1.02037	1.11068	1.23201	1.17343	1.07462		2.09021	2.44697	2.25703	2.22773	1.73415
1.0273	1.11072	1.23647	1.16894	1.08063		2.08896	2.39925	2.36136	2.54396	1.73015
1.01786	1.11105	1.22584	1.17709	1.08479		2.11898	2.58322	2.37181	2.40666	1.81024
1.02238	1.1114	1.23913	1.1652	1.07346		2.1409	2.57103	2.39126	2.45444	1.73938
1.01755	1.10965	1.23505	1.14144	1.07733		2.15837	2.59287	2.43639	2.47344	1.74459
1.01733	1.1086	1.22268	1.14133	1.07933		2.16548	2.35602	2.52706	2.51336	1.75867
1.01768	1.10856	1.22629	1.15208	1.07257		2.17234	2.6499	2.55178	2.41327	1.76973
1.02032	1.10844	1.23205	1.17721	1.07266		2.17915	2.39613	2.57398	2.51046	1.73665
1.0178	1.10814	1.23305	1.16348	1.07861		2.19571	2.57356	2.72758	2.34327	1.7586
1.02231	1.10891	1.23953	1.14501	1.07407		2.21455	2.52844	2.76944	2.40013	1.75884
1.01445	1.10856	1.24046	1.13826	1.07177		2.20662	2.53035	2.76942	2.45367	1.79677
1.0178	1.10893	1.2275	1.1668	1.07411		2.25459	2.45141	2.81697	2.37619	1.79336
1.02259	1.11168	1.24325	1.12147	1.06898		2.2434	2.54547	2.85162	2.51302	1.78594
1.01882	1.11064	1.23372	1.12738	1.07207		2.26297	2.43123	2.92849	2.31383	1.74331
1.02154	1.10841	1.23501	1.1593	1.06943		2.29264	2.54376	2.94171	2.58178	1.77504
1.01773	1.10832	1.22157	1.15535	1.08009		2.31956	2.53562	3.00726	2.4963	1.74825
1.01486	1.10875	1.24307	1.17862	1.07546		2.35639	2.54573	3.14023	2.63091	1.79233
1.01733	1.10961	1.26336	1.12513	1.07425		2.32992	2.63406	3.20492	2.48668	1.7886
1.02127	1.10956	1.28113	1.11415	1.07563		2.35541	2.58021	3.22467	2.44364	1.78989
1.02319	1.11045	1.28194	1.1569	1.06673		2.38395	2.82357	3.25396	2.52992	1.75271
1.02094	1.10895	1.28385	1.13598	1.07683		2.38696	2.74002	3.36111	2.56105	1.75378
1.00904	1.10857	1.27921	1.18767	1.07476		2.40991	2.75059	3.38551	2.63375	1.78724
1.02039	1.10908	1.28353	1.16423	1.07269		2.41366	2.77851	3.48579	2.53543	1.79573
1.0095	1.10844	1.27127	1.13105	1.07324		2.4383	2.60106	3.50156	2.69394	1.77278
1.01676	1.10807	1.26383	1.11357	1.07153		2.469	2.70442	3.7575	2.56241	1.7458
1.02969	1.10915	1.27145	1.16675	1.08005		2.4941	2.64211	3.71202	2.64737	1.83754
1.01781	1.10838	1.26504	1.12948	1.07269		2.50635	2.64925	3.8642	2.61341	1.7714
1.01589	1.10766	1.25919	1.16452	1.0767		2.49496	2.69686	3.91001	2.69524	1.81418
1.02609	1.10749	1.25382	1.15295	1.08204		2.51998	2.69514	4.07526	2.55061	1.79399
1.01743	1.10762	1.24573	1.16471	1.07743		2.53408	2.63126	4.04349	2.58227	1.82758
1.01815	1.10684	1.24753	1.141	1.075		2.56087	2.48064	4.23666	2.62097	1.84475
1.01554	1.10601	1.24472	1.13995	1.07868		2.56886	2.64127	4.32617	2.69592	1.80565
1.01583	1.10692	1.24852	1.12563	1.07926		2.60716	2.67844	4.23873	2.80201	1.85477
1.01871	1.10633	1.22806	1.14439	1.08001		2.58638	2.67399	4.34483	2.72674	1.83112
1.01918	1.10634	1.22905	1.11366	1.07771		2.60031	2.68797	4.47232	2.84751	1.80531
1.01144	1.1059	1.23785	1.1497	1.07875		2.64053	2.47409	4.57094	2.5927	1.80944
1.02409	1.10675	1.23512	1.15082	1.07795		2.64621	2.64415	4.56503	2.75357	1.82251
1.02358	1.1061	1.23578	1.1457	1.08028		2.66766	2.70089	4.82471	2.84736	1.82481
1.01473	1.10498	1.24397	1.12235	1.06952		2.704	2.48297	4.96369	2.72636	1.78136
1.0174	1.10769	1.25004	1.13191	1.08129		2.72437	2.51008	4.99667	2.76893	1.81908
1.01365	1.10529	1.2292	1.13573	1.07875		2.75061	2.4856	5.08635	2.6812	1.8304
1.02363	1.10554	1.23965	1.11669	1.07829		2.75818	2.36797	5.11061	2.89369	1.84729
1.01679	1.10634	1.24194	1.15596	1.07495		2.77928	2.55279	5.13326	2.71327	1.83642
1.02026	1.1074	1.2431	1.14206	1.07684		2.79217	2.6039	5.33027	2.82668	1.82247
1.01856	1.10507	1.23447	1.13022	1.07191		2.79068	2.65629	5.34348	2.91471	1.85331
1.02345	1.10694	1.23022	1.13041	1.07534		2.79473	2.53419	5.4566	3.03818	1.83526
1.02125	1.1063	1.21381	1.15345	1.07556		2.82697	2.39019	5.50749	2.89301	1.88352
1.0271	1.10689	1.20982	1.12956	1.08497		2.84443	2.47561	5.64703	2.92709	1.87519
1.01993	1.1082	1.21015	1.15323	1.08078		2.84516	2.43253	5.61947	3.12311	1.88569
1.02124	1.10669	1.2088	1.11005	1.08286		2.83886	2.58512	5.75955	2.89176	1.89816
1.01504	1.10501	1.21189	1.1368	1.08226		2.88358	2.52845	5.63171	2.90582	1.957
1.02193	1.10816	1.22356	1.11373	1.07686		2.89302	2.46926	5.9319	2.98913	1.9716
1.02184	1.10423	1.21467	1.09708	1.08422		2.90448	2.59703	5.83296	3.03306	1.94483
1.02673	1.1056	1.19949	1.10189	1.08417		2.92696	2.54208	6.00689	3.07693	1.96047
1.01778	1.10912	1.20321	1.11248	1.08455		2.96676	2.46664	6.07827	2.91027	1.98038
1.02238	1.10648	1.19845	1.14833	1.09026		2.9611	2.54896	6.13399	3.00075	1.95184
1.0189	1.1059	1.21548	1.15335	1.08355		2.99311	2.6923	6.19787	3.01604	1.99601
1.01888	1.10238	1.20702	1.14481	1.09045		2.98356	2.49803	6.24429	3.0297	1.96854
1.0089	1.10259	1.20027	1.11897	1.08791		2.99091	2.50892	6.4302	3.09585	1.9748
1.0145	1.10076	1.21007	1.11791	1.08382		3.02909	2.69015	6.5224	3.07897	2.00562
1.02537	1.10072	1.19897	1.14009	1.0794		3.0452	2.52265	6.68758	3.04654	1.98753
1.02376	1.10395	1.19779	1.12438	1.08386		3.04637	2.68655	6.67671	3.11758	2.03826
1.01485	1.10438	1.19858	1.13349	1.08909		3.0616	2.61754	6.65102	3.13425	2.01307
1.0188	1.10226	1.19485	1.11272	1.08157		3.06839	2.73403	6.77948	3.25659	2.02313
1.01168	1.10509	1.20968	1.14436	1.08635		3.05087	2.53696	6.94184	3.11101	2.01815
1.01158	1.10389	1.21016	1.13572	1.08551		3.09981	2.65185	7.07946	3.26452	1.99683
1.02316	1.10148	1.21867	1.13815	1.08227		3.09424	2.70148	6.95192	3.36451	2.0342
1.02284	1.10478	1.21715	1.13778	1.07533		3.1263	2.72868	7.13662	3.22369	2.02983
1.02137	1.10625	1.21358	1.17074	1.08416		3.1349	2.65529	7.15993	3.0648	1.96226
1.02873	1.10265	1.21198	1.11861	1.0887		3.11768	2.62133	7.29911	3.24307	2.03162
1.02141	1.10206	1.21078	1.14569	1.09474		3.16311	2.81859	7.27436	3.32087	2.03569
1.0198	1.10566	1.21994	1.1319	1.10021		3.14707	2.79597	7.19923	3.42053	2.10418
1.02454	1.10107	1.21323	1.13848	1.09834		3.19187	2.70287	7.25263	3.12689	2.07752
1.01916	1.10098	1.21376	1.1683	1.10336		3.26484	2.63197	7.45059	3.08951	2.09392
1.02865	1.10213	1.20643	1.10755	1.09438		3.26323	2.74515	7.43896	3.3282	2.08715
1.0207	1.10292	1.20824	1.12295	1.10089		3.2229	2.67683	7.50433	3.26869	2.0937
1.02284	1.10021	1.21055	1.11423	1.10249		3.24903	2.55935	7.49221	3.22682	2.10304
1.02247	1.10068	1.21277	1.1224	1.09588		3.27961	2.44407	7.52499	3.34069	2.09379
1.02099	1.1004	1.20612	1.13723	1.09055		3.32046	2.61292	7.53297	3.23971	2.11115
1.02927	1.10111	1.21012	1.1184	1.08891		3.33281	2.50351	7.5683	3.34027	2.13264
1.01612	1.10002	1.20539	1.12648	1.09951		3.34056	2.54004	7.63686	3.50077	2.13318
1.01767	1.10055	1.20687	1.12348	1.08589		3.34761	2.56511	7.7685	3.45411	2.15139
1.02494	1.10003	1.20327	1.14917	1.082		3.39165	2.71085	7.78544	3.33714	2.12101
1.02438	1.10067	1.20288	1.15341	1.08532		3.43766	2.55674	7.73549	3.57274	2.17264
1.01888	1.09999	1.20814	1.13992	1.08294		3.45105	2.53126	7.73566	3.40034	2.17397
1.0249	1.09964	1.20385	1.08711	1.07431		3.51422	2.55221	7.78154	3.5228	2.19158
1.01771	1.10092	1.20371	1.12876	1.08233		3.4949	2.62763	8.06503	3.65837	2.17098
1.02059	1.10245	1.19783	1.12637	1.07083		3.49041	2.63834	7.87471	3.6336	2.19952
1.01964	1.0989	1.19651	1.14315	1.07173		3.48164	2.55317	7.99872	3.55269	2.24465
1.02468	1.10082	1.20379	1.12183	1.07594		3.50997	2.66759	8.03026	3.60642	2.26675
1.01981	1.10081	1.18713	1.13014	1.06327		3.48445	2.6763	7.90537	3.44293	2.29314
1.01763	1.09883	1.19315	1.12405	1.08179		3.51577	2.57555	7.99357	3.63022	2.27974
1.03003	1.09893	1.1972	1.13158	1.06916		3.56503	2.65242	7.96518	3.52345	2.2834
1.02261	1.09876	1.19747	1.13384	1.06782		3.56676	2.5758	8.16853	3.42714	2.26694
1.01913	1.10092	1.20068	1.15326	1.07086		3.58113	2.50595	8.12977	3.72897	2.30927
1.02421	1.09979	1.20412	1.14046	1.07825		3.59991	2.60928	8.10708	3.73453	2.27413
1.01658	1.10022	1.20831	1.14885	1.0724		3.61369	2.67142	8.08561	3.62619	2.29877
1.02173	1.09986	1.21402	1.10206	1.06553		3.64538	2.63602	8.16815	3.73409	2.32692
1.01925	1.09911	1.21495	1.18017	1.07692		3.67624	2.61377	8.30043	3.83163	2.35214
1.02045	1.09955	1.212	1.17643	1.07509		3.70332	2.70674	8.18262	3.86522	2.35769
1.02928	1.1006	1.20498	1.11969	1.07087		3.70705	2.60436	8.37796	3.70822	2.38041
1.01512	1.10074	1.21075	1.11508	1.0729		3.74998	2.74051	8.25961	3.57884	2.35018
1.02013	1.10111	1.20962	1.15298	1.0747		3.77996	2.71508	8.2855	3.90277	2.37904
1.01759	1.09945	1.20162	1.08948	1.07702		3.78986	2.69353	8.32595	3.85693	2.38722
1.01459	1.10004	1.1991	1.16437	1.0689		3.79578	2.59236	8.33586	3.9063	2.3663
1.02109	1.10141	1.19454	1.11142	1.06549		3.81814	2.61336	8.35214	3.73215	2.35232
1.01754	1.10043	1.19647	1.1392	1.07285		3.83784	2.7575	8.54801	3.73715	2.3634
1.01534	1.09868	1.21018	1.08068	1.06339		3.83978	2.74046	8.46888	3.86039	2.34933
1.02079	1.0993	1.20955	1.14128	1.07566		3.89045	2.74178	8.48984	3.84231	2.45107
1.02169	1.09842	1.20947	1.12884	1.07211		3.90324	2.65449	8.57005	3.78438	2.43482
1.01771	1.09971	1.20382	1.12624	1.07387		3.9208	2.66852	8.49406	3.96015	2.40777
1.02726	1.09882	1.20324	1.12936	1.07462		3.94683	2.55822	8.64606	3.88135	2.39428
1.01627	1.09955	1.19704	1.12377	1.0768		3.9747	2.60774	8.69236	3.87172	2.48589
1.01721	1.09923	1.1934	1.14675	1.0725		3.97881	2.55586	8.47934	3.92167	2.49498
1.01249	1.09817	1.19602	1.14501	1.08225		4.01872	2.6728	8.5007	3.85184	2.51756
1.0306	1.09806	1.19849	1.12208	1.0746		4.00951	2.74582	8.45025	3.829	2.48641
1.01313	1.09914	1.19834	1.13687	1.07035		4.03259	2.64588	8.54457	3.99901	2.58459
1.01979	1.09885	1.20213	1.12589	1.07054		4.1064	2.76074	8.43694	3.93238	2.49153
1.03009	1.09816	1.19578	1.10923	1.0692		4.10837	2.57572	8.54159	3.90872	2.53407
1.02301	1.09858	1.19504	1.11884	1.07334		4.101	2.70452	8.56411	3.87867	2.54512
1.01788	1.09903	1.19694	1.10898	1.07498		4.1188	2.56497	8.50388	3.92581	2.54312
1.01942	1.09837	1.19834	1.12482	1.06783		4.18522	2.59242	8.5847	3.88381	2.516
1.01799	1.09919	1.20659	1.11622	1.06947		4.14702	2.64567	8.61722	3.87995	2.50097
1.03037	1.09789	1.20955	1.15703	1.06422		4.20115	2.48917	8.57462	4.06951	2.57305
1.01467	1.09481	1.21917	1.07533	1.07015		4.24001	2.75947	8.55778	4.57894	2.59766
1.01985	1.09589	1.21178	1.11946	1.06731		4.19487	2.77879	8.51774	4.68228	2.55164
1.0252	1.09597	1.21001	1.10927	1.06521		4.24852	2.62007	8.49224	4.71419	2.52147
1.02299	1.09647	1.21842	1.10586	1.06362		4.29554	2.62793	8.65396	4.72564	2.58458
1.01909	1.09626	1.21634	1.11952	1.06195		4.3076	2.79484	8.58204	4.76371	2.64101
1.01894	1.09712	1.22956	1.1145	1.05453		4.32828	2.62109	8.6895	4.76483	2.62387
1.01897	1.09694	1.24072	1.14454	1.05851		4.32778	2.62062	8.66795	4.77018	2.62466
1.01966	1.09737	1.2449	1.11928	1.06566		4.35797	2.67134	8.64907	4.75995	2.67028
1.02316	1.09714	1.22858	1.1459	1.05974		4.37674	2.7209	8.56708	4.77442	2.62518
1.02344	1.09889	1.22835	1.13039	1.0611		4.3933	2.6685	8.66745	4.78341	2.66289
1.02232	1.09716	1.22485	1.12283	1.06406		4.40001	2.44736	8.75974	4.75528	2.63837
1.0255	1.09774	1.21851	1.11049	1.05755		4.4251	2.72187	8.62369	4.79205	2.67257
1.01949	1.09577	1.22453	1.14781	1.06139		4.43689	2.6887	8.57078	4.77204	2.67387
1.01474	1.09523	1.22112	1.11358	1.05959		4.46433	2.68998	8.80171	4.82969	2.70442
1.02434	1.09512	1.22087	1.12215	1.06191		4.49419	2.6236	8.62723	4.85257	2.71294
1.025	1.09473	1.22065	1.0999	1.05908		4.50776	2.74669	8.77527	4.85465	2.688
1.02825	1.09477	1.22204	1.15027	1.06073		4.53744	2.68085	8.81343	4.85515	2.59866
1.01912	1.09604	1.21845	1.12094	1.05884		4.56179	2.62829	8.68892	4.85409	2.6726
1.02152	1.09747	1.21376	1.1263	1.05592		4.5282	2.78089	8.61799	4.85523	2.66982
1.02105	1.09591	1.21446	1.08595	1.05479		4.57806	2.609	8.70774	4.83238	2.65021
1.02454	1.09518	1.21074	1.13586	1.06286		4.60799	2.68617	8.66824	4.79761	2.67393
1.01567	1.09561	1.21996	1.0883	1.05217		4.57696	2.89844	8.78188	4.80596	2.70674
1.01675	1.09569	1.22148	1.12268	1.05572		4.58994	2.67905	8.85831	4.78854	2.65479
1.02713	1.09628	1.2192	1.13214	1.05889		4.61326	2.67822	8.80919	4.79604	2.74103
1.01593	1.09584	1.2255	1.13238	1.05934		4.67432	2.68555	8.71274	4.81988	2.7832
1.02512	1.09469	1.23214	1.08181	1.05836		4.68483	2.59288	8.70292	4.82834	2.72473
1.02007	1.09537	1.22541	1.11622	1.05631		4.69329	2.71447	8.67549	4.81156	2.77449
1.02071	1.09642	1.23007	1.10287	1.06237		4.70022	2.6233	8.76079	4.83029	2.73739
1.02756	1.09582	1.22221	1.11568	1.0626		4.73933	2.74743	8.77195	4.81539	2.73232
1.01786	1.09524	1.22751	1.10655	1.05797		4.76047	2.58019	8.77069	4.84573	2.79059
1.01853	1.09539	1.21965	1.0969	1.05348		4.73762	2.66214	8.58993	4.83699	2.76036
1.02422	1.09475	1.22731	1.14508	1.06193		4.80458	2.59178	8.7623	4.82486	2.81984
1.01682	1.09417	1.22501	1.12888	1.05608		4.7903	2.61768	8.54586	4.85372	2.83548
1.02232	1.09535	1.22189	1.11307	1.04952		4.84081	2.64011	8.67965	4.81039	2.83921
1.0165	1.09292	1.22778	1.11006	1.04935		4.85494	2.73234	8.6402	4.81768	2.8199
1.01513	1.09508	1.23015	1.10278	1.05325		4.85233	2.56929	8.73144	4.87258	2.78995
1.01958	1.09383	1.22714	1.14942	1.05282		4.88791	2.80042	8.80319	4.93067	2.89433
1.02077	1.09417	1.23665	1.13196	1.04839		4.88019	2.71147	8.74716	4.92626	2.8703
1.01387	1.09355	1.22794	1.09301	1.04771		4.91516	2.75207	8.83674	4.85803	2.8352
1.02281	1.09313	1.22671	1.09413	1.04895		4.9	2.56718	8.74544	4.89879	2.87466
1.02229	1.0959	1.2396	1.11354	1.04728		4.95142	2.71353	8.70851	4.90891	2.87852
1.02668	1.09118	1.25533	1.10237	1.05042		4.96488	2.71567	8.85663	4.91106	2.82481
1.05218	1.09181	1.25814	1.1097	1.04689		4.98136	2.71638	8.79444	4.92682	2.83025
1.04476	1.09403	1.26822	1.12213	1.0459		4.99201	2.67079	8.87033	4.89373	2.87109
1.03951	1.09275	1.2572	1.12438	1.04357		4.98878	2.72389	8.84074	4.95853	2.86103
1.03707	1.09304	1.25443	1.14035	1.05457		5.00816	2.7754	8.81278	4.97145	2.83067
1.02931	1.09169	1.25516	1.12043	1.04377		5.04366	2.81708	8.81338	4.97226	2.86789
1.02979	1.09228	1.24571	1.13133	1.04424		5.0627	2.74027	8.80072	4.94716	2.91578
1.03236	1.09235	1.2504	1.12749	1.05046		5.08509	2.62946	8.71353	4.94754	2.87154
1.03488	1.09358	1.26354	1.10047	1.04792		5.0961	2.79617	8.70849	4.93114	2.9526
1.01652	1.09367	1.28622	1.10144	1.04645		5.13324	2.63296	8.82077	4.915	2.88999
1.0154	1.09278	1.30672	1.0883	1.0497		5.16217	2.62329	8.67792	4.91467	2.96415
1.02127	1.09282	1.31502	1.10654	1.03908		5.14719	2.6375	8.76971	4.93716	2.90246
1.02532	1.09202	1.34474	1.10781	1.04953		5.15395	2.58835	8.74748	4.96205	2.96943
1.02295	1.09365	1.33428	1.10947	1.04771		5.17531	2.60152	8.8824	4.95922	2.94782
1.00765	1.09201	1.35505	1.10188	1.04292		5.17457	2.69969	8.67944	4.96833	2.96274
1.01451	1.09279	1.35729	1.11996	1.04505		5.18656	2.5812	8.71185	4.93771	2.95525
1.0187	1.09332	1.35935	1.13452	1.04599		5.24624	2.71581	8.73166	4.9821	2.92812
1.02381	1.09207	1.35492	1.11133	1.04513		5.23782	2.66931	8.66357	4.95847	2.93051
1.01465	1.08964	1.36493	1.11595	1.04516		5.24674	2.55206	8.64656	4.9634	2.92307
1.02443	1.09038	1.35915	1.13613	1.04915		5.25022	2.52731	8.68325	4.96263	2.99102
1.02107	1.09398	1.34407	1.1287	1.05684		5.31221	2.64734	8.63662	4.93864	2.97075
1.02898	1.09452	1.35987	1.11269	1.05502		5.30944	2.7428	8.74732	4.99627	2.9776
1.01954	1.09305	1.3589	1.11243	1.05698		5.33084	2.67168	8.65553	5.01758	2.98864
1.00761	1.09187	1.35865	1.10436	1.05158		5.33307	2.69113	8.72688	5.02684	2.97445
1.0193	1.09295	1.36593	1.15275	1.05109		5.3199	2.7125	8.66598	5.02126	3.0392
1.0223	1.09228	1.37068	1.1205	1.05271		5.39009	2.73713	8.7064	5.01588	3.00862
1.0251	1.09082	1.37174	1.10222	1.0516		5.3665	2.79356	8.59354	5.0499	3.0356
1.02528	1.09116	1.36936	1.09192	1.04862		5.40983	2.54774	8.52054	5.03594	2.983
1.02261	1.08766	1.37625	1.05455	1.04541		5.40345	2.49873	8.5868	4.97092	3.00294
1.01824	1.08945	1.3704	1.11149	1.05272		5.40764	2.64244	8.52254	4.95208	3.01792
1.0188	1.08984	1.37352	1.12836	1.04323		5.40168	2.58524	8.51969	4.97468	2.98036
1.02724	1.09032	1.37584	1.07782	1.05379		5.4589	2.69828	8.56648	5.01456	2.9842
1.02957	1.08908	1.39349	1.10919	1.04584		5.46396	2.70271	8.427	4.99976	3.00172
1.0185	1.09051	1.39418	1.09144	1.04675		5.44521	2.69937	8.58136	4.99561	2.95476
1.02391	1.08926	1.38624	1.09388	1.05055		5.48723	2.67485	8.58828	5.00266	2.94028
1.02369	1.08958	1.37842	1.1047	1.05142		5.52027	2.72938	8.6133	4.99776	2.97068
1.0196	1.08925	1.38576	1.08398	1.04648		5.50571	2.76048	8.621	5.01666	3.03691
1.02057	1.08839	1.39624	1.10756	1.04706		5.54354	2.63796	8.72186	4.99912	3.00183
1.02609	1.08763	1.39001	1.11813	1.04057		5.56547	2.59082	8.53945	5.0334	3.07289
1.02012	1.08918	1.38341	1.08494	1.04286		5.56329	2.90751	8.60702	5.01787	3.04937
1.01639	1.0899	1.38672	1.08306	1.05076		5.57734	2.61327	8.40125	5.03749	3.033
1.02418	1.09	1.39149	1.1239	1.04799		5.60528	2.59186	8.54855	5.00383	3.02246
1.01897	1.08949	1.38602	1.08049	1.04143		5.60301	2.55017	8.5418	5.03564	3.03743
1.02023	1.08915	1.37725	1.05674	1.04266		5.64784	2.62155	8.63875	5.08854	3.07802
1.01021	1.08937	1.37857	1.09845	1.04985		5.60293	2.64653	8.61513	5.05464	3.08393
1.02446	1.08975	1.37857	1.10523	1.04783		5.67209	2.58288	8.70629	5.0872	3.12634
1.01435	1.08729	1.37156	1.08712	1.04534		5.66738	2.7191	8.77871	5.05997	3.17607
1.01861	1.08674	1.36554	1.06885	1.04827		5.6746	2.60904	8.49399	5.03311	3.11228
1.02013	1.08687	1.36491	1.07617	1.05296		5.72878	2.70793	8.57254	5.03834	3.16664
1.01107	1.08855	1.36979	1.10641	1.04456		5.70674	2.46977	8.49171	5.04822	3.23639
1.02067	1.09012	1.36013	1.11409	1.04396		5.73472	2.63335	8.4695	5.02516	3.1799
1.01029	1.08637	1.35988	1.11657	1.04704		5.7315	2.71489	8.66642	4.7801	3.26655
1.0272	1.08948	1.34371	1.11929	1.04503		5.74028	2.61996	8.54037	4.47926	3.29365
1.0261	1.08874	1.34201	1.10593	1.04984		5.76289	2.74927	8.60859	4.49696	3.32569
1.02288	1.08767	1.34962	1.07864	1.04466		5.77311	2.72899	8.81499	4.51834	3.24784
1.01956	1.08621	1.33862	1.09979	1.04867		5.77628	2.61513	8.65081	4.74996	3.33023
1.0263	1.08844	1.34202	1.09674	1.04526		5.79373	2.75259	8.64628	4.548	3.34491
1.0194	1.08545	1.32824	1.08936	1.05766		5.80949	2.75994	8.65185	4.42225	3.34853
1.02132	1.08737	1.3339	1.06544	1.05638		5.85087	2.72385	8.65717	4.65365	3.38835
1.01644	1.0886	1.3256	1.08499	1.05059		5.83221	2.67473	8.76913	4.43565	3.42798
1.01721	1.09084	1.32805	1.11069	1.0514		5.84033	2.7315	8.74534	4.70938	3.42961
1.01173	1.08846	1.32489	1.10478	1.05428		5.85247	2.80994	8.60464	4.57339	3.33557
1.01784	1.08887	1.33327	1.06174	1.05337		5.86953	2.788	8.63611	4.55223	3.41796
1.02356	1.08888	1.3196	1.11434	1.05558		5.89633	2.58691	8.6325	4.53083	3.41894
1.02344	1.08713	1.32804	1.09913	1.05141		5.89774	2.76712	8.63543	4.52428	3.49503
1.0204	1.08976	1.31715	1.11636	1.05278		5.88811	2.72484	8.61707	4.50716	3.41464
1.01235	1.08876	1.31493	1.06702	1.05073		5.91179	2.6025	8.73295	4.54069	3.41426
1.01978	1.08726	1.30728	1.12256	1.05181		5.9538	2.65751	8.73909	4.468	3.45887
1.02811	1.08662	1.3088	1.1089	1.04941		5.95742	2.67335	8.82819	4.36205	3.48145
1.01741	1.08592	1.31006	1.11543	1.05178		5.94497	2.75562	8.64463	4.47668	3.49696
1.02209	1.08649	1.30832	1.06445	1.04792		5.97363	2.6083	8.65976	4.38697	3.40315
1.01801	1.08628	1.31808	1.0875	1.04977		5.9741	2.62165	8.71537	4.53394	3.51721
1.02364	1.08656	1.3029	1.12975	1.05733		5.98093	2.65165	8.62587	4.50578	3.52367
1.01767	1.08591	1.29785	1.11121	1.05806		5.99654	2.59523	8.77828	4.42352	3.51144
1.0246	1.08544	1.29308	1.13083	1.06154		6.01241	2.8328	8.76234	4.52618	3.44854
1.01912	1.08319	1.29338	1.1079	1.06301		6.03072	2.74983	8.7117	4.55191	3.53236
1.02065	1.08687	1.28608	1.09531	1.05671		6.05252	2.69299	8.84353	4.59453	3.51513
1.01248	1.08534	1.28487	1.0986	1.05809		6.03519	2.64411	8.72941	4.33612	3.53988
1.01951	1.08502	1.28043	1.12109	1.06161		6.06292	2.70295	8.72509	4.52588	3.64234
1.02294	1.08391	1.29016	1.09539	1.05468		6.04584	2.68858	8.74762	4.64315	3.61295
1.02152	1.08478	1.28076	1.08768	1.05036		6.04784	2.90926	8.80346	4.5151	3.63022
1.02522	1.08618	1.28282	1.12969	1.0591		6.07265	2.66255	8.78636	4.37855	3.64898
1.01869	1.08507	1.27145	1.09756	1.05774		6.10465	2.73204	8.6089	4.46053	3.64379
1.01453	1.08366	1.26761	1.1083	1.04828		6.11091	2.62752	8.58153	4.47473	3.64717
1.0176	1.08466	1.27141	1.07008	1.05747		6.0902	2.74802	8.68903	4.50305	3.70137
1.01173	1.0834	1.26975	1.09857	1.05022		6.09148	2.67537	8.4476	4.60064	3.63932
1.02192	1.08206	1.25789	1.10044	1.05063		6.12844	2.76883	8.75397	4.38225	3.69687
1.02471	1.08277	1.26869	1.09524	1.05043		6.15096	2.77078	8.77525	4.3542	3.71345
1.02874	1.08624	1.26561	1.10493	1.05352		6.13917	2.77839	8.71332	4.49593	3.69247
1.0269	1.08552	1.25645	1.08989	1.06357		6.15089	2.80957	8.54025	4.44213	3.64443
1.02113	1.08441	1.26019	1.06574	1.0629		6.13521	2.80676	8.60252	4.27957	3.683
1.01679	1.08311	1.27139	1.11391	1.06689		6.14965	3.00334	8.62025	4.32928	3.75096
1.02124	1.08531	1.26513	1.11651	1.06611		6.13645	2.81377	8.79943	4.45783	3.73807
1.01759	1.0826	1.26938	1.0945	1.06539		6.15113	2.94257	8.61703	4.615	3.71897
1.02329	1.08293	1.2646	1.093	1.06091		6.18396	2.71156	8.61683	4.46457	3.69339
1.01739	1.08133	1.26442	1.085	1.06383		6.16504	2.61433	8.69437	4.62972	3.7545
1.02238	1.08554	1.26134	1.09943	1.06143		6.18866	2.79183	8.68823	4.28667	3.82946
1.0144	1.08395	1.25546	1.13025	1.061		6.20007	2.76272	8.54134	4.31368	3.83051
1.01862	1.08259	1.26286	1.0993	1.06061		6.19687	2.75223	8.58456	4.67693	3.86102
1.01667	1.08294	1.2487	1.08894	1.06055		6.20695	2.72734	8.66909	4.4872	3.88696
1.01432	1.08253	1.24567	1.0706	1.05605		6.22848	2.81394	8.52363	4.51748	3.9521
1.021	1.08112	1.26205	1.12881	1.05925		6.19804	2.84664	8.63271	4.46704	3.95333
1.0168	1.08238	1.25299	1.09913	1.06381		6.21126	2.77551	8.71635	4.4229	3.88481
1.02345	1.08031	1.25214	1.08639	1.0598		6.23829	2.91222	8.72946	4.62502	3.88798
1.02284	1.0806	1.24268	1.09374	1.06357		6.23998	2.78508	8.57103	4.39324	3.9603
1.0185	1.08225	1.23697	1.10132	1.0623		6.22766	2.77068	8.61087	4.50751	3.86413
1.01534	1.08093	1.23837	1.09512	1.0704		6.24795	2.85678	8.68589	4.33528	3.93779
1.0245	1.08036	1.2399	1.13472	1.065		6.24526	2.7414	8.54722	4.51716	3.94178
1.02004	1.08024	1.23435	1.09751	1.06541		6.24255	2.55779	8.73511	4.28333	3.96443
1.0297	1.08173	1.2343	1.10752	1.05726		6.26047	2.68139	8.57423	4.33435	3.95492
1.01626	1.07761	1.23643	1.10068	1.06329		6.26225	2.90827	8.63155	4.44924	3.93728
1.01422	1.08115	1.2377	1.09536	1.06384		6.25598	2.86903	8.59339	4.38958	3.98465
1.01673	1.07933	1.24276	1.12072	1.05264		6.28946	2.6225	8.71134	4.51917	4.02054
1.02681	1.07917	1.23828	1.08778	1.05396		6.29017	2.8571	8.57119	4.54396	4.00097
1.01993	1.07914	1.24599	1.08232	1.06096		6.29618	2.6743	8.69196	4.42166	4.01169
1.01307	1.0793	1.24036	1.09908	1.06556		6.28298	2.62969	8.65041	4.28747	4.0662
1.02144	1.07784	1.2411	1.12325	1.06099		6.30795	2.71194	8.69806	4.40258	4.03795
1.01569	1.07854	1.23455	1.10813	1.05613		6.32844	2.69636	8.68737	4.53805	3.97316
1.01138	1.07777	1.23521	1.1341	1.05924		6.32432	2.57363	8.68058	4.35693	4.05417
1.02343	1.07814	1.23154	1.1208	1.0571		6.31781	2.79991	8.68361	4.35144	4.02055
1.0069	1.07959	1.23609	1.10056	1.05877		6.32681	2.87544	8.75472	4.38138	4.03383
1.02564	1.07838	1.24034	1.11912	1.04769		6.31673	2.90708	8.53832	4.22918	3.95895
1.02145	1.07866	1.23745	1.12992	1.05014		6.32783	2.76473	8.5068	4.37298	4.00464
1.01932	1.07793	1.23099	1.12029	1.05876		6.33821	2.84183	8.56439	4.46632	4.00883
1.01607	1.07786	1.23869	1.12029	1.057		6.32225	2.6953	8.57079	4.32437	3.9896
1.01772	1.07936	1.23366	1.12851	1.05048		6.33342	2.81727	8.58639	4.57698	3.91786
1.01715	1.0797	1.23277	1.07147	1.05768		6.3462	2.74615	8.52415	4.47783	4.0198
1.01127	1.07916	1.22217	1.12089	1.05399		6.36029	2.84319	8.66513	4.44351	4.00336
1.0211	1.08073	1.22932	1.11845	1.05428		6.36698	2.69414	8.72115	4.24134	4.04584
1.01877	1.07837	1.22573	1.12091	1.05459		6.36296	2.88268	8.59926	4.53808	4.10276
1.02605	1.07916	1.22923	1.12929	1.04764		6.35582	2.71357	8.67095	4.26705	4.09269
1.02673	1.07896	1.23248	1.10454	1.06113		6.37569	2.74433	8.65605	4.40097	4.05638
1.02395	1.07923	1.22472	1.09322	1.06057		6.37288	2.86474	8.71532	4.44048	4.12623
1.02357	1.07871	1.22388	1.09976	1.05591		6.35408	2.68717	8.81307	4.55683	4.07559
1.02781	1.07653	1.21236	1.1266	1.06231		6.37127	2.69713	8.69772	4.5015	4.08617
1.02212	1.07803	1.21708	1.11682	1.06786		6.36737	2.77015	8.64298	4.44449	4.15327
1.01437	1.07731	1.20799	1.15175	1.04895		6.38584	2.8507	8.63451	4.37159	4.09534
1.0204	1.07672	1.20966	1.13995	1.06017		6.39217	2.76897	8.80039	4.34445	4.18892
1.02058	1.07668	1.21949	1.10335	1.06381		6.39935	2.75388	8.62394	4.62097	4.12116
1.02325	1.07758	1.2179	1.11566	1.05154		6.40042	2.60834	8.7666	4.43143	4.16941
1.02281	1.07704	1.2157	1.11271	1.05698		6.42268	2.64251	8.6234	4.45288	4.05649
1.02031	1.07824	1.20446	1.12499	1.064		6.42406	2.74266	8.5587	4.33715	4.0928
1.01417	1.07785	1.20923	1.12666	1.06282		6.40932	2.58754	8.73684	4.36294	4.09143
1.00338	1.07678	1.21491	1.11961	1.06265		6.40893	2.74765	8.62023	4.57957	4.03672
1.01686	1.07788	1.20607	1.12634	1.06082		6.39621	2.58257	8.58695	4.52942	4.06716
1.01893	1.07709	1.21172	1.09172	1.05326		6.42632	2.6056	8.77864	4.41259	4.06104
1.02652	1.07746	1.20729	1.10126	1.05805		6.40422	2.71127	8.51234	4.40306	4.01259
1.01462	1.07872	1.20477	1.09287	1.06007		6.41658	2.68505	8.59332	4.55528	4.0688
1.02006	1.0775	1.20382	1.10695	1.0682		6.41378	2.55877	8.75025	4.46759	4.06357
1.01984	1.07817	1.21271	1.11813	1.07296		6.4324	2.58423	8.62175	4.32345	4.10302
1.02159	1.07812	1.20977	1.08716	1.07265		6.43263	2.59959	8.6847	4.41447	4.07574
1.01148	1.07774	1.21203	1.12536	1.07088		6.44874	2.74006	8.57237	4.12961	4.12431
1.02239	1.07663	1.20876	1.09692	1.06663		6.43972	2.66209	8.6887	4.35162	4.05272
1.01315	1.07666	1.21441	1.08282	1.06347		6.43211	2.68354	8.61764	4.17613	4.20299
1.0199	1.07468	1.21239	1.113	1.06432		6.43139	2.77696	8.55349	4.34829	4.17264
1.02185	1.07559	1.20513	1.07403	1.06821		6.44449	3.00554	8.62529	4.23876	4.15451
1.013	1.07548	1.21513	1.12375	1.06453		6.42671	2.86109	8.59195	4.2944	4.11191
1.01609	1.07615	1.2052	1.11377	1.06167		6.45056	2.82147	8.71121	4.09928	4.13794
1.01125	1.07598	1.21635	1.11076	1.07277		6.44678	2.90747	8.53798	4.41015	4.10138
1.01887	1.0757	1.21097	1.10243	1.06818		6.45572	2.99839	8.56497	4.35764	4.13252
1.01802	1.07482	1.21105	1.10649	1.06556		6.46763	2.89355	8.54103	4.13843	4.03441
1.0172	1.07453	1.22138	1.05646	1.06618		6.45414	2.90034	8.47468	4.37843	4.05841
1.01622	1.07367	1.21298	1.07391	1.07217		6.4435	2.96389	8.64414	4.20643	4.00354
1.02251	1.07408	1.20946	1.08822	1.06272		6.47877	3.0975	8.6022	4.3304	4.05099
1.01746	1.07316	1.20715	1.10924	1.07551		6.50035	2.97481	8.51368	4.31346	3.98889
1.01147	1.0734	1.20486	1.1103	1.06356		6.49125	2.86368	8.58218	4.28888	4.0507
1.02046	1.07607	1.20075	1.11403	1.05781		6.49726	2.99274	8.72242	4.38805	3.99464
1.02021	1.07561	1.19716	1.12437	1.06058		6.48862	3.1278	8.6887	4.38949	3.97459
1.02328	1.07443	1.19799	1.09145	1.06626		6.48143	3.1308	8.60429	4.36248	3.94377
1.01644	1.07391	1.19344	1.07733	1.05743		6.48588	2.98101	8.52658	4.46175	3.95674
1.02528	1.07324	1.20458	1.06773	1.05724		6.48958	3.00536	8.56269	4.31428	3.85545
1.02584	1.0731	1.19629	1.07344	1.05726		6.49711	3.08319	8.61325	4.3801	3.9056
1.01859	1.07334	1.20115	1.10151	1.05615		6.4936	3.09679	8.60468	4.24246	4.03318
1.02521	1.07371	1.20519	1.09209	1.0574		6.48925	3.0024	8.76752	3.98863	3.9365
1.01545	1.07513	1.20684	1.08342	1.05268		6.49544	3.06189	8.71589	4.38964	4.01783
1.01534	1.07422	1.19649	1.09393	1.05956		6.49709	2.98142	8.54359	4.35294	3.96403
1.02028	1.07284	1.19996	1.12272	1.05892		6.50625	3.12286	8.4584	4.33354	3.99567
1.02792	1.07412	1.20386	1.14431	1.05404		6.49666	3.07477	8.69846	4.22966	3.95675
1.02206	1.07435	1.19328	1.06662	1.05355		6.48779	3.04087	8.50564	4.38854	3.99336
1.0141	1.07174	1.19423	1.08115	1.05228		6.49167	3.04202	8.44028	4.37631	3.95336
1.02016	1.07354	1.195	1.10668	1.0597		6.50616	3.08102	8.5215	4.51091	4.01063
1.02158	1.07358	1.1911	1.08912	1.05354		6.5182	2.95321	8.73665	4.22065	4.02295
1.01586	1.07328	1.19327	1.10898	1.05472		6.52459	2.95603	8.50694	4.3344	3.9643
1.02393	1.07442	1.19618	1.09642	1.05011		6.50234	2.7536	8.56328	4.44026	3.99025
1.02352	1.07286	1.18647	1.07905	1.05991		6.52578	2.63891	8.49591	4.04062	3.99822
1.02039	1.07187	1.18536	1.10114	1.05192		6.52572	2.78392	8.68376	4.11976	4.05112
1.02407	1.0717	1.18603	1.11381	1.05732		6.52449	2.78918	8.57925	4.1301	4.03718
1.01571	1.07198	1.18078	1.07662	1.05772		6.50863	2.69457	8.54905	4.14907	4.03533
1.02009	1.06968	1.1892	1.09639	1.04411		6.50877	2.82347	8.67189	4.33485	4.07687
1.01753	1.07165	1.18923	1.10194	1.04666		6.53336	2.774	8.54128	4.43317	4.06045
1.01934	1.06952	1.18302	1.0864	1.0492		6.51861	2.76796	8.71133	4.24576	3.99586
1.02402	1.06936	1.17499	1.10556	1.04681		6.53544	2.97049	8.64873	4.26947	4.02874
1.01989	1.07056	1.17426	1.06617	1.05693		6.5359	2.92306	8.62707	4.07191	4.11169
1.02112	1.07133	1.18142	1.07441	1.04685		6.53811	3.04309	8.64469	4.1095	4.00504
1.02048	1.07042	1.18099	1.0839	1.04695		6.53313	2.9636	8.51844	4.32481	4.10007
1.02084	1.07195	1.1785	1.03384	1.0493		6.52597	2.93455	8.55302	4.46664	4.16111
1.02038	1.07187	1.18205	1.10152	1.04461		6.54143	2.98844	8.56001	4.47086	4.07742
1.01614	1.06937	1.17887	1.11802	1.05336		6.51537	2.99373	8.67498	4.36238	4.21683
1.02261	1.07033	1.19408	1.0914	1.05216		6.53834	3.08926	8.53239	4.2546	4.20412
1.0181	1.06898	1.1893	1.09145	1.05689		6.52956	2.98725	8.40088	3.98593	4.20635
1.01959	1.06852	1.18542	1.0763	1.05954		6.52987	2.94966	8.5319	4.32531	4.16206
1.01898	1.06795	1.18215	1.09765	1.05923		6.54288	2.90405	8.54107	4.20932	4.07047
1.02132	1.07049	1.18746	1.10012	1.05532		6.56459	2.95874	8.52136	4.29695	4.16163
1.0201	1.07068	1.1877	1.12495	1.06171		6.54611	2.98067	8.43559	4.07016	4.09816
1.02125	1.06935	1.19253	1.10884	1.05738		6.5456	3.04581	8.38287	4.066	4.20784
1.02534	1.07018	1.18703	1.11729	1.05483		6.56336	2.95106	8.73798	4.41165	4.16575
1.02997	1.06933	1.18178	1.07199	1.05681		6.5537	3.05577	8.55224	4.47896	4.12972
1.01953	1.06986	1.17565	1.03546	1.05307		6.56756	3.18303	8.57852	4.24588	4.14466
1.0189	1.06617	1.16974	1.08393	1.05426		6.57384	3.09132	8.53111	3.90954	4.16332
1.01532	1.06916	1.1782	1.11333	1.05398		6.57049	3.25124	8.49151	4.24645	4.19602
1.01932	1.06934	1.17035	1.10856	1.05058		6.55924	3.19026	8.41186	4.0043	4.11426
1.02383	1.07115	1.16488	1.11929	1.05577		6.57586	3.07478	8.24408	4.49589	4.10723
1.02261	1.06896	1.16647	1.10454	1.04804		6.57509	3.28326	8.26078	4.12402	4.15848
1.02361	1.06826	1.16526	1.09767	1.04689		6.55924	3.03452	8.35409	3.7782	4.2335
1.01795	1.06869	1.17566	1.1157	1.05106		6.57751	3.12012	8.24081	4.08936	4.14909
1.02663	1.06742	1.17426	1.09255	1.05692		6.58606	2.91892	8.46175	4.20973	4.21124
1.0155	1.06653	1.16759	1.08803	1.04774		6.57436	2.93228	8.36676	4.42322	4.20491
1.01228	1.06607	1.16239	1.10127	1.04403		6.585	2.99121	8.62305	4.24534	4.13729
1.0152	1.06603	1.17047	1.10784	1.04971		6.59159	2.99895	8.18924	4.27448	4.18601
1.01763	1.06668	1.16484	1.0828	1.04685		6.59094	2.83099	8.22347	4.42897	4.21358
1.02776	1.06601	1.15308	1.10603	1.03999		6.58254	3.09773	8.47898	4.16601	4.15983
1.02312	1.06743	1.16267	1.0677	1.0409		6.5866	3.0017	8.44904	4.18433	4.248
1.01888	1.06582	1.15559	1.13156	1.04266		6.59786	2.93786	8.44927	4.35705	4.22736
1.01264	1.06555	1.15739	1.08962	1.04739		6.6062	3.01124	8.61704	4.35694	4.13519
1.01368	1.06413	1.16266	1.09301	1.04239		6.57649	3.11447	8.37688	4.09754	4.24508
1.02531	1.0645	1.15476	1.11051	1.03419		6.59649	3.10017	8.53826	4.25523	4.15646
1.01336	1.06576	1.15136	1.09998	1.0377		6.58909	3.13691	8.3368	4.24589	4.14257
1.01904	1.06518	1.15739	1.13638	1.03944		6.56403	3.0641	8.42265	4.12857	4.12328
1.01949	1.06627	1.16644	1.10728	1.03963		6.57493	3.17805	8.45129	4.18016	4.13486
1.02163	1.06574	1.17421	1.12139	1.04298		6.5854	3.11907	8.4993	4.25268	4.16204
1.02143	1.06447	1.16791	1.07953	1.03886		6.58553	3.22762	8.30379	4.24674	4.21911
1.01202	1.06455	1.17677	1.09922	1.03808		6.62148	3.22566	8.63874	4.16297	4.24385
1.0274	1.06521	1.17394	1.07893	1.03421		6.61496	3.18267	8.61347	4.14524	4.22208
1.01172	1.06557	1.17885	1.08786	1.03668		6.60815	3.35651	8.56218	4.018	4.16497
1.01674	1.06456	1.16806	1.10868	1.03912		6.60609	3.19735	8.36564	3.93163	4.21605
1.01423	1.06512	1.16499	1.11697	1.0357		6.60296	3.1945	8.45339	3.9698	4.17031
1.02476	1.06591	1.17053	1.13149	1.03546		6.60899	3.31442	8.44501	4.13682	4.22148
1.01674	1.06414	1.18043	1.11308	1.03614		6.60831	3.30483	8.58911	4.32691	4.186
1.01755	1.0646	1.19048	1.08769	1.03197		6.59631	3.18555	8.40528	4.15952	4.14085
1.01762	1.06649	1.19003	1.1071	1.03585		6.58097	3.28697	8.63753	4.01099	4.18207
1.01807	1.06507	1.17609	1.11164	1.03425		6.61431	3.24624	8.55767	4.10009	4.23182
1.02899	1.06429	1.17555	1.05135	1.03153		6.59989	3.29045	8.57567	4.25409	4.18307
1.01679	1.06649	1.16991	1.10919	1.0363		6.5978	3.2187	8.49799	4.26516	4.1753
1.02059	1.06562	1.16532	1.09428	1.03255		6.61838	3.27738	8.55504	4.06243	4.20446
1.02151	1.06395	1.16576	1.11952	1.02964		6.60401	3.3052	8.45465	4.48263	4.13243
1.02043	1.0644	1.16584	1.10202	1.03316		6.61748	3.33858	8.47338	4.45648	4.20094
1.02239	1.06442	1.16206	1.08883	1.02992		6.61684	3.2524	8.59856	4.24799	4.09579
1.02116	1.06299	1.1577	1.11352	1.03978		6.61595	3.13207	8.5314	4.40488	4.18164
1.01352	1.06225	1.16069	1.07854	1.03695		6.63172	3.25406	8.66287	3.96573	4.18455
1.02155	1.06464	1.16177	1.08972	1.03287		6.64159	3.14149	8.66246	4.08415	4.1759
1.0154	1.06388	1.15869	1.08552	1.03445		6.63583	3.34278	8.69418	4.38059	4.14351
1.01867	1.06212	1.15303	1.0658	1.02972		6.63284	3.43063	8.47316	4.23503	4.10138
1.02444	1.0647	1.14862	1.11927	1.02977		6.60898	3.35168	8.58979	4.05815	4.14701
1.02002	1.06464	1.15224	1.09048	1.03248		6.6184	3.37388	8.53211	4.26641	4.13056
1.02575	1.06288	1.1553	1.14427	1.03058		6.63096	3.2782	8.45927	4.02581	4.0317
1.0191	1.06287	1.15619	1.12491	1.03884		6.62687	3.41273	8.56789	4.14621	4.0987
1.0188	1.06281	1.15553	1.11404	1.04144		6.63273	3.33756	8.63935	3.89285	4.03091
1.01798	1.06057	1.14627	1.12229	1.04165		6.63698	3.33953	8.50937	4.06063	4.01776
1.01885	1.06231	1.14391	1.10833	1.03851		6.64079	3.19005	8.23433	4.36804	4.06514
1.0162	1.06479	1.14627	1.10774	1.03566		6.64424	3.2915	8.28618	4.083	4.09398
1.01554	1.06431	1.14148	1.09701	1.0351		6.63621	3.34779	8.52201	3.92397	4.10055
1.01944	1.06194	1.1452	1.10219	1.04397		6.6278	3.44971	8.37958	4.21591	4.14034
1.01605	1.06406	1.13713	1.11333	1.03599		6.64169	3.37374	8.59288	4.44991	4.01957
1.02472	1.06425	1.14277	1.10555	1.03434		6.64034	3.33166	8.61702	4.28647	3.93049
1.01681	1.06339	1.13988	1.10434	1.03516		6.6437	3.22319	8.46113	4.39834	4.01005
1.02096	1.06395	1.13931	1.13115	1.02866		6.65351	3.27317	8.36235	3.8783	4.04013
1.00805	1.06375	1.13462	1.09077	1.03536		6.63862	3.24954	8.53135	4.03842	3.96389
1.02467	1.06332	1.14538	1.06336	1.03934		6.62452	3.37359	8.45254	3.94319	4.02163
1.02266	1.06318	1.1343	1.1048	1.04803		6.62474	3.39819	8.48344	4.16271	3.99738
1.01872	1.06585	1.13805	1.12762	1.0393		6.64344	3.26053	8.58791	3.92804	4.10557
1.02421	1.0621	1.14373	1.08095	1.02755		6.64078	3.47798	8.34195	4.23581	4.06715
1.02469	1.06316	1.13184	1.03978	1.04007		6.62927	3.36346	8.30611	4.19557	4.04335
1.02194	1.06499	1.1307	1.0775	1.03076		6.6366	3.32226	8.4954	4.24798	3.97216
1.01473	1.06441	1.12651	1.1038	1.03636		6.64531	3.40999	8.56861	4.28282	3.98014
1.01827	1.06284	1.13204	1.14809	1.02653		6.65934	3.52344	8.45199	4.41873	3.92597
1.02208	1.06391	1.12281	1.11619	1.04018		6.62924	3.5869	8.5651	4.1254	3.95926
1.02042	1.06352	1.12357	1.08555	1.03458		6.65626	3.31209	8.50466	4.38093	3.92924
1.02242	1.06194	1.11611	1.10616	1.03222		6.6491	3.47753	8.46101	4.3148	3.95864
1.0234	1.06191	1.12029	1.09816	1.02577		6.64367	3.56978	8.52492	4.45434	4.00885
1.02144	1.06173	1.12041	1.1045	1.02595		6.6588	3.34731	8.59452	4.27226	3.94705
1.01075	1.06166	1.11669	1.0843	1.03106		6.64535	3.56198	8.70169	3.98904	4.09878
1.01667	1.06198	1.11296	1.09424	1.03171		6.64762	3.55477	8.36467	4.15801	3.98255
1.01474	1.06368	1.10876	1.0917	1.03016		6.66684	3.4873	8.39628	3.96038	4.03396
1.02337	1.06204	1.11179	1.11246	1.02668		6.65182	3.52854	8.31091	4.12529	3.9211
1.01577	1.06097	1.10646	1.07604	1.02938		6.65594	3.51248	8.34473	4.147	3.94929
1.02048	1.06317	1.10559	1.08598	1.03365		6.64353	3.65934	8.4873	4.08716	4.01544
1.02456	1.06032	1.11011	1.10616	1.02344		6.65649	3.65286	8.57328	3.97263	4.08952
1.02016	1.06077	1.11203	1.08542	1.0252		6.65437	3.62014	8.44524	4.19054	4.01798
1.01739	1.06263	1.10419	1.07692	1.02127		6.65591	3.68514	8.27299	4.13369	4.01751
1.02668	1.06119	1.10178	1.1158	1.03244		6.64482	3.55865	8.63065	4.04711	3.98395
1.01151	1.05991	1.09983	1.0921	1.02355		6.65492	3.76665	8.49821	4.02991	3.92442
1.02341	1.05854	1.10109	1.07881	1.02974		6.64792	3.69306	8.4186	4.09667	3.92963
1.02434	1.06141	1.10353	1.06497	1.0247		6.64614	3.78048	8.56437	4.30393	4.01792
1.0172	1.06069	1.09564	1.1224	1.02568		6.62746	3.68842	8.56175	4.21532	4.04647
1.01699	1.06062	1.10206	1.07199	1.02481		6.61622	3.76465	8.54676	4.05918	4.0385
1.02176	1.06187	1.09642	1.10034	1.03718		6.62706	3.72265	8.43753	3.84872	4.14632
1.02114	1.05851	1.09684	1.0697	1.03203		6.63529	3.61042	8.4465	4.29898	4.16583
1.02595	1.06364	1.10116	1.1041	1.02645		6.63324	3.77354	8.54607	3.78213	4.14738
1.01647	1.06337	1.09991	1.09866	1.02558		6.64076	3.84718	8.47642	4.05117	4.14949
1.02086	1.0609	1.09489	1.09618	1.03464		6.66236	3.83275	8.52191	4.04579	4.13205
1.01977	1.06006	1.09975	1.11759	1.02832		6.65262	3.96157	8.49688	4.20883	4.1461
1.01783	1.06335	1.09443	1.06375	1.02649		6.66814	3.97317	8.44016	4.01305	4.13422
1.02804	1.06274	1.10118	1.07681	1.03338		6.65952	3.85227	8.32379	4.19437	4.25772
1.01478	1.05958	1.09932	1.09939	1.031		6.64374	3.88524	8.42133	3.94586	4.22687
1.02431	1.06139	1.11137	1.11539	1.02754		6.66156	3.80674	8.39818	4.01317	4.1904
1.01853	1.05985	1.10464	1.1028	1.03038		6.65549	3.80824	8.4769	3.87115	4.31112
1.02127	1.06017	1.10621	1.09609	1.0377		6.65737	3.86904	8.4667	4.13448	4.26797
1.02496	1.06083	1.10429	1.13064	1.03266		6.65027	3.90605	8.55046	4.29079	4.22526
1.01709	1.05933	1.10999	1.09187	1.05272		6.67491	4.02944	8.36689	3.93182	4.30535
1.01963	1.0579	1.10621	1.09071	1.04061		6.66786	3.91561	8.42982	3.81939	4.20103
1.02423	1.05678	1.10285	1.09664	1.03996		6.65689	3.99129	8.37539	4.15865	4.28041
1.01975	1.06016	1.10453	1.09611	1.03419		6.64161	3.85602	8.44751	4.24455	4.30651
1.02492	1.05954	1.11218	1.12042	1.0475		6.63513	3.77098	8.50642	4.35835	4.31534
1.01247	1.05899	1.1162	1.11261	1.04712		6.64166	4.01555	8.3227	4.18222	4.34646
1.01981	1.0597	1.11251	1.08922	1.04404		6.65808	3.97225	8.3438	4.00411	4.28492
1.02519	1.05974	1.11356	1.10664	1.03946		6.66784	4.02312	8.32298	4.1546	4.20037
1.02246	1.0585	1.12842	1.08626	1.04432		6.66212	4.02606	8.32569	4.27643	4.2751
1.01976	1.05876	1.11598	1.10388	1.04415		6.65121	3.92018	8.2559	4.22391	4.24946
1.01831	1.05845	1.11928	1.07105	1.04358		6.66042	3.81449	8.43165	4.23043	4.2109
1.01983	1.05712	1.12422	1.02206	1.0303		6.66183	3.88802	8.58302	4.21909	4.15356
1.01447	1.05653	1.1181	1.11023	1.03651		6.67487	3.95262	8.24521	4.16951	4.25813
1.01836	1.05742	1.11991	1.09832	1.02941		6.67268	4.16514	8.41869	4.31657	4.20599
1.02188	1.05816	1.12302	1.10783	1.03485		6.6742	4.04129	8.31646	4.1605	4.20069
1.02067	1.05806	1.11422	1.10166	1.03334		6.66131	4.08476	8.27678	4.12603	4.19016
1.02239	1.05691	1.11038	1.09553	1.03534		6.65103	4.16814	8.45995	4.13231	4.25016
1.02467	1.0549	1.11072	1.09302	1.03292		6.67226	3.99973	8.30413	4.1087	4.12797
1.02037	1.05717	1.1106	1.07893	1.03964		6.66718	3.99304	8.26412	3.9332	4.24823
1.01563	1.05845	1.12311	1.10953	1.03718		6.65385	4.1523	8.35342	4.03148	4.16617
1.01937	1.05617	1.12292	1.11196	1.03247		6.65732	3.99608	8.48046	4.16139	4.16996
1.00983	1.05324	1.12617	1.09497	1.04059		6.66716	4.13833	8.34449	3.827	4.23343
1.01878	1.05514	1.11764	1.07469	1.03395		6.68169	4.06351	8.35545	4.16867	4.24501
1.01697	1.05528	1.11391	1.11525	1.0399		6.68717	4.20806	8.47413	4.17174	4.19455
1.01601	1.0518	1.12138	1.13029	1.04058		6.68058	4.01422	8.43791	3.96641	4.26032
1.02215	1.05441	1.12115	1.08162	1.0435		6.6514	4.09259	8.43406	4.20108	4.1443
1.02112	1.05612	1.12227	1.08915	1.03859		6.67206	4.18438	8.31713	4.37684	4.25964
1.01827	1.0556	1.12186	1.09632	1.03819		6.6745	4.11667	8.36051	4.46888	4.24155
1.01816	1.05637	1.12541	1.09145	1.04469		6.66205	4.16305	8.47375	4.08919	4.19846
1.01541	1.05586	1.1154	1.07969	1.03967		6.66723	4.14347	8.47003	4.0545	4.15281
1.01361	1.05543	1.12004	1.08458	1.04356		6.63682	4.14556	8.42154	4.21592	4.20722
1.01855	1.05544	1.11517	1.10817	1.04348		6.65808	4.2616	8.54772	4.21748	4.17976
1.01965	1.05659	1.11528	1.0807	1.04578		6.67805	4.10219	8.43988	4.0018	4.06069
1.01649	1.05602	1.10792	1.11816	1.04073		6.68703	4.32559	8.49888	4.12998	4.15472
1.01176	1.05334	1.12499	1.10608	1.03975		6.65952	4.35541	8.38729	4.15776	4.08897
1.01791	1.0555	1.12258	1.09286	1.04284		6.66671	4.25612	8.42486	4.24054	3.98675
1.01991	1.05432	1.12356	1.09801	1.04347		6.67093	4.28226	8.46759	3.84992	4.08994
1.02051	1.05526	1.12152	1.08776	1.04005		6.67971	4.25073	8.30222	3.954	4.09575
1.01579	1.0529	1.12571	1.07868	1.04084		6.66486	4.35987	8.46395	3.86259	4.09801
1.01733	1.05528	1.13037	1.07522	1.03763		6.67128	4.196	8.45571	3.88877	4.0196
1.01675	1.05292	1.1428	1.09653	1.03884		6.64878	4.10743	8.33704	3.87966	4.12203
1.01902	1.05436	1.15788	1.08519	1.03087		6.66668	4.25261	8.38189	3.9311	4.14079
1.01367	1.05433	1.15406	1.0915	1.03698		6.66426	4.38701	8.39017	4.28417	4.18591
1.0259	1.0545	1.15098	1.10586	1.0415		6.65694	4.29416	8.27275	4.28456	4.16603
1.02517	1.05612	1.15159	1.08651	1.04264		6.65235	4.15164	8.37337	4.15855	4.21103
1.01306	1.05667	1.15517	1.07166	1.04964		6.65641	4.23398	8.38493	3.94391	4.25551
1.01924	1.05543	1.15281	1.11173	1.03978		6.64717	4.1934	8.54305	4.08356	4.23407
1.01991	1.05429	1.1528	1.10766	1.04786		6.65698	4.33029	8.29448	3.99093	4.25259
1.01518	1.05159	1.14375	1.08698	1.0433		6.66089	4.26143	8.44719	4.14904	4.25246
1.02358	1.0546	1.14413	1.06388	1.05237		6.63506	4.44418	8.35176	4.31247	4.25114
1.01276	1.05245	1.14293	1.06465	1.0552		6.64145	4.27677	8.43144	4.09905	4.25254
1.01284	1.05213	1.14644	1.09368	1.05602		6.64565	4.39505	8.38475	3.94516	4.26538
1.0234	1.0529	1.1471	1.08422	1.05143		6.67353	4.38629	8.31286	4.19519	4.27153
1.01096	1.05359	1.14826	1.08738	1.05089		6.67437	4.40143	8.31808	3.98082	4.29298
1.0179	1.05255	1.15058	1.09421	1.0469		6.65546	4.17594	8.3164	3.87063	4.28776
1.01951	1.0512	1.1419	1.05319	1.05527		6.65325	4.37813	8.41044	4.35915	4.27259
1.02719	1.05044	1.14554	1.09362	1.0459		6.6431	4.40969	8.39761	4.22279	4.3077
1.01491	1.05004	1.14617	1.04075	1.04785		6.65512	4.44539	8.38801	4.05231	4.25367
1.01854	1.05063	1.15636	1.0751	1.04626		6.65449	4.33432	8.32231	3.92085	4.24142
1.01652	1.051	1.14188	1.0436	1.04025		6.64688	4.30668	8.38986	3.99934	4.26171
1.01653	1.05005	1.14374	1.04962	1.0427		6.63625	4.3714	8.25875	3.95684	4.22896
1.01728	1.04998	1.15003	1.07641	1.03955		6.63411	4.3347	8.40857	3.97573	4.23482
1.02028	1.05296	1.14577	1.06126	1.03876		6.6425	4.21975	8.41894	3.88214	4.17991
1.01426	1.05181	1.14815	1.06228	1.03411		6.62197	4.30008	8.32604	4.29923	4.2307
1.01301	1.05025	1.15168	1.02358	1.03742		6.62528	4.3878	8.32005	3.90464	4.32568
1.00929	1.05426	1.14659	1.07585	1.04149		6.61916	4.34961	8.34282	4.26798	4.24199
1.02374	1.05082	1.14807	1.08516	1.03326		6.63977	4.54765	8.49691	3.9131	4.31743
1.02379	1.05502	1.14804	1.04986	1.03604		6.63987	4.31621	8.31223	4.11027	4.31107
1.01785	1.05165	1.14583	1.06197	1.03191		6.66291	4.53982	8.43961	4.19245	4.24927
1.0207	1.05157	1.14602	1.0795	1.02875		6.65548	4.4558	8.3354	4.18668	4.28083
1.01424	1.05022	1.14709	1.04468	1.03686		6.6358	4.29716	8.482	4.12762	4.24326
1.02008	1.04906	1.14111	1.05509	1.03154		6.63604	4.40988	8.3526	4.1429	4.2236
1.00932	1.0521	1.14814	1.07181	1.03551		6.62805	4.42073	8.40204	4.05384	4.3162
1.02849	1.05207	1.15011	1.06962	1.02844		6.63441	4.38775	8.3177	4.25765	4.30976
1.01388	1.05138	1.14641	1.07641	1.03095		6.63016	4.46812	8.54581	4.17467	4.26936
1.02637	1.04893	1.14066	1.06841	1.02846		6.66124	4.34529	8.31126	4.00278	4.23329
1.02326	1.05097	1.14063	1.03455	1.02751		6.63575	4.28181	8.19797	4.15203	4.24285
1.01645	1.049	1.13657	1.03826	1.03253		6.63262	4.24897	8.39277	3.97284	4.19451
1.01421	1.05024	1.1419	1.06752	1.02519		6.63003	4.45261	8.29738	4.02567	4.32828
1.01374	1.0487	1.13606	1.05931	1.03229		6.62121	4.4437	8.41008	4.13088	4.36354
1.01117	1.05136	1.14421	1.06406	1.02975		6.6489	4.49242	8.38041	4.30691	4.33839
1.01955	1.04983	1.14081	1.08725	1.03955		6.63292	4.34022	8.46093	4.01894	4.32858
1.02831	1.04969	1.14184	1.04298	1.02303		6.63642	4.36213	8.34518	4.2497	4.30522
1.02327	1.04977	1.14022	1.05053	1.02184		6.61097	4.20215	8.35919	4.03576	4.29074
1.01361	1.05003	1.14428	1.02415	1.02992		6.62429	4.34779	8.45733	3.94946	4.3017
1.02483	1.05007	1.13252	1.04917	1.02103		6.61046	4.34627	8.36163	4.06	4.26244
1.01626	1.04995	1.13967	1.0527	1.02287		6.62535	4.39508	8.31462	4.48502	4.29356
1.01744	1.04916	1.13015	1.06974	1.01538		6.61116	4.23191	8.47009	4.23866	4.28382
1.01799	1.05049	1.13402	1.09315	1.02443		6.59479	4.39103	8.47669	4.18939	4.27018
1.01871	1.04862	1.13107	1.05651	1.02934		6.6273	4.37551	8.31885	4.12146	4.24843
1.0178	1.04766	1.13983	1.0738	1.02529		6.64239	4.11387	8.3508	4.20813	4.17144
1.01557	1.04828	1.13026	1.05709	1.02929		6.62212	4.34786	8.57304	4.26792	4.21944
1.01772	1.04967	1.13479	1.0438	1.0331		6.63054	4.41751	8.332	4.03116	4.23821
1.02068	1.04824	1.13675	1.04787	1.03808		6.6118	4.46018	8.38513	4.06375	4.23267
1.01186	1.05088	1.12906	1.07515	1.04194		6.63169	4.42392	8.35818	4.07733	4.27834
1.02455	1.0491	1.12899	1.02252	1.0354		6.63255	4.36605	8.344	4.06107	4.22725
1.01083	1.0472	1.12899	1.0591	1.03978		6.62996	4.56715	8.4094	4.29367	4.32376
1.01198	1.04687	1.14178	1.0584	1.03773		6.61154	4.35744	8.46344	4.3693	4.29418
1.02138	1.04794	1.14161	1.0503	1.03956		6.62421	4.40157	8.44648	4.33376	4.20087
1.0112	1.04803	1.15959	1.07736	1.03895		6.61139	4.23227	8.45698	4.22589	4.27336
1.01909	1.04811	1.15666	1.06886	1.03682		6.61746	4.44542	8.25572	4.13988	4.28926
1.00859	1.04828	1.15935	1.06527	1.03977		6.61601	4.29457	8.41521	4.16429	4.26806
1.01927	1.04811	1.15249	1.06886	1.03311		6.60024	4.22708	8.44595	4.04206	4.2308
1.01001	1.04885	1.15139	1.06436	1.04006		6.61266	4.26286	8.28047	4.3056	4.31463
1.0152	1.04607	1.15868	1.07473	1.02755		6.61587	4.32162	8.25937	4.23115	4.31132
1.01189	1.04857	1.15158	1.06785	1.03183		6.60843	4.40247	8.35276	4.42163	4.25524
1.02039	1.04735	1.14347	1.04567	1.03678		6.62014	4.3266	8.35395	4.40529	4.26366
1.01459	1.0453	1.14471	1.03401	1.03668		6.59749	4.51081	8.39681	4.36382	4.24907
1.02236	1.04558	1.16089	1.03403	1.04169		6.61392	4.41717	8.32356	4.22396	4.24275
1.01415	1.04631	1.16465	1.08113	1.04098		6.62774	4.53722	8.35133	4.14627	4.24572
1.02467	1.04546	1.16847	1.02933	1.04295		6.61511	4.42844	8.25484	4.14921	4.21407
1.02083	1.04682	1.17721	1.04821	1.04266		6.63254	4.4483	8.30706	4.40909	4.20411
1.02088	1.04836	1.19196	1.05826	1.03625		6.63239	4.50741	8.31876	4.10051	4.2496
1.01843	1.04876	1.1989	1.04663	1.04116		6.63447	4.52127	8.32706	4.21665	4.23184
1.02148	1.04924	1.1933	1.04673	1.0382		6.64441	4.31331	8.31647	4.34584	4.23195
1.01624	1.04833	1.1857	1.0756	1.03184		6.63788	4.33056	8.39137	4.45394	4.25272
1.01559	1.04882	1.18934	1.01056	1.03946		6.62002	4.55035	8.30681	4.39729	4.30003
1.01952	1.04913	1.18647	1.05735	1.03557		6.5858	4.44318	8.23848	4.32624	4.18937
1.01811	1.0477	1.18738	1.07392	1.03558		6.6054	4.44412	8.34059	4.03582	4.16801
1.02083	1.05015	1.17858	1.04631	1.03579		6.58953	4.47648	8.30028	4.11181	4.14453
1.0234	1.04815	1.17961	1.08217	1.02727		6.59812	4.54097	8.3754	4.24702	4.18682
1.02115	1.04697	1.17953	1.05685	1.03187		6.59465	4.35265	8.48279	4.38798	4.20727
1.01806	1.04639	1.17394	1.06812	1.02824		6.58465	4.52852	8.21653	4.3527	4.16027
1.01347	1.04622	1.17447	1.10609	1.02633		6.56907	4.45113	8.3281	4.40685	4.12242
1.00949	1.04644	1.18388	1.06292	1.02225		6.57261	4.4057	8.44362	4.22474	4.16522
1.0204	1.04415	1.18567	1.07046	1.02296		6.58218	4.40823	8.35974	4.0988	4.27008
1.02364	1.04444	1.18736	1.08446	1.02903		6.59241	4.40184	8.29362	4.33608	4.29592
1.01463	1.04575	1.19353	1.07065	1.03192		6.57551	4.4211	8.37073	4.03323	4.18564
1.01371	1.04344	1.19573	1.07482	1.02836		6.57904	4.57144	8.2656	4.23438	4.14443
1.01276	1.04434	1.19644	1.0534	1.03192		6.5743	4.40501	8.36782	4.04236	4.17424
1.02212	1.04478	1.19308	1.05738	1.02927		6.59105	4.46809	8.29619	4.23968	4.12107
1.0197	1.04485	1.18248	1.05446	1.02944		6.58856	4.41494	8.34193	4.19971	4.1445
1.01618	1.04294	1.18983	1.03352	1.02749		6.59818	4.36538	8.42734	4.00099	4.14653
1.015	1.04349	1.19273	1.08105	1.02803		6.58812	4.4947	8.26394	4.21585	4.03973
1.01895	1.04498	1.17638	1.06831	1.02424		6.5978	4.59972	8.26829	4.46002	4.12735
1.01796	1.04534	1.17588	1.04294	1.01599		6.59011	4.46714	8.40539	4.21761	4.1851
1.01977	1.04642	1.17046	1.08268	1.02739		6.57695	4.60743	8.32348	4.27723	4.11486
1.01346	1.0464	1.17257	1.03432	1.02565		6.6059	4.6249	8.3161	4.42454	4.1661
1.0156	1.04584	1.16891	1.04762	1.02142		6.59564	4.47004	8.16458	4.10005	4.20359
1.02146	1.04547	1.16437	1.06321	1.02754		6.58798	4.49472	8.36959	4.36316	4.23574
1.01686	1.0435	1.16391	1.05377	1.02754		6.57162	4.48597	8.20364	4.38182	4.25681
1.02316	1.04328	1.16908	1.08841	1.02354		6.58647	4.58058	8.23008	4.39183	4.20902
1.02362	1.04316	1.16802	1.09152	1.02059		6.58411	4.55945	8.19167	4.34483	4.23882
1.01609	1.04303	1.16191	1.0613	1.02934		6.58734	4.52589	8.1552	4.37574	4.26267
1.01727	1.04284	1.16853	1.06588	1.03188		6.59181	4.44346	8.27625	4.40225	4.20343
1.01357	1.04256	1.17021	1.02956	1.02188		6.558	4.24924	8.18906	4.20376	4.08778
1.01228	1.04442	1.16174	1.074	1.02869		6.58313	4.39538	8.19309	4.21658	4.26868
1.0153	1.04367	1.16188	1.05423	1.02893		6.5624	4.39811	8.36621	4.33693	4.17683
1.00909	1.04183	1.16269	1.0785	1.02556		6.57695	4.48831	8.15348	4.26204	4.13124
1.00895	1.04222	1.15626	1.07811	1.02789		6.58681	4.25595	8.15479	4.47681	4.16336
1.01019	1.04172	1.16475	1.06727	1.03001		6.57669	4.42254	8.33468	4.23716	4.19658
1.01508	1.04405	1.17177	1.05173	1.02558		6.58197	4.46799	8.2323	4.26199	4.20814
1.01516	1.04357	1.16751	1.03624	1.01887		6.58354	4.53848	8.14898	4.32573	4.14757
1.01224	1.04117	1.16865	1.0576	1.02494		6.58003	4.44571	8.08292	4.43149	4.14996
1.01784	1.04458	1.17107	1.06972	1.02473		6.58577	4.51182	8.29135	4.43436	4.21798
1.02172	1.04425	1.17304	1.03214	1.0167		6.58545	4.41856	8.20014	4.32712	4.09048
1.02441	1.04403	1.16688	1.04573	1.02752		6.59773	4.3186	8.23582	4.40728	4.107
1.0138	1.04411	1.16221	1.03914	1.02497		6.57939	4.55462	8.19749	4.11519	4.11458
1.01922	1.04431	1.15545	1.04144	1.032		6.56574	4.41311	8.31381	4.27335	4.05449
1.01301	1.04255	1.15282	1.05828	1.01659		6.5373	4.53249	8.21367	4.05952	4.04647
1.00801	1.0437	1.15481	1.05443	1.02325		6.55568	4.43786	8.05565	4.41022	4.08329
1.02209	1.04383	1.15923	1.03334	1.02749		6.56037	4.34392	8.28746	4.53285	4.10623
1.02192	1.04379	1.15174	1.05102	1.02287		6.55976	4.39557	8.11159	4.19283	4.0622
1.01643	1.04295	1.16086	1.09554	1.02761		6.56874	4.43556	8.17558	4.37493	3.98683
1.00552	1.04115	1.15591	1.10068	1.0291		6.53603	4.22262	8.07932	4.39845	4.09614
1.00931	1.04245	1.15598	1.0369	1.0259		6.57222	4.40544	8.24669	4.39108	4.08282
1.02431	1.04244	1.15551	1.05615	1.02735		6.55485	4.43152	8.08422	4.35355	4.0284
1.00974	1.0418	1.16409	1.07142	1.02405		6.54635	4.70477	8.1637	4.45827	4.04485
1.01085	1.04161	1.16651	1.04925	1.01989		6.5591	4.49172	8.18367	4.15463	4.00715
1.01456	1.04081	1.16473	1.0628	1.01312		6.53847	4.57504	8.17785	4.36172	4.04236
1.01862	1.04106	1.16941	1.06556	1.02501		6.5508	4.46647	8.24928	4.44411	4.12584
1.01392	1.04103	1.16359	1.07288	1.02411		6.55143	4.42006	8.26337	4.40989	4.0869
1.0175	1.04301	1.15724	1.05531	1.02344		6.54578	4.53781	8.11587	4.28931	4.05408
1.01636	1.0422	1.15315	1.07925	1.01965		6.57215	4.60687	8.3109	4.55083	4.06289
1.02905	1.04195	1.15932	1.06333	1.01656		6.55856	4.50872	8.15906	4.26291	4.07575
1.02048	1.0411	1.15589	1.05368	1.01978		6.54562	4.35345	8.22137	4.38907	4.12422
1.01544	1.04104	1.15682	1.05462	1.01641		6.53106	4.56026	8.19862	4.15961	4.10396
1.01131	1.03974	1.15729	1.06766	1.02561		6.51246	4.51967	8.25018	4.2129	4.07178
1.02059	1.04011	1.17946	1.08029	1.02616		6.55777	4.62548	8.10959	4.41059	4.10846
1.01968	1.04041	1.20733	1.04765	1.01572		6.55239	4.57071	8.25249	4.25473	4.09295
1.01771	1.03851	1.21415	1.08027	1.02639		6.55561	4.47301	8.14389	4.58395	4.12814
1.01696	1.04053	1.21618	1.02954	1.01977		6.53933	4.34707	8.12495	4.40545	4.09333
1.01573	1.04017	1.22184	1.06504	1.02553		6.54996	4.32955	8.0611	4.48625	4.1138
1.02084	1.03923	1.21988	1.06948	1.02465		6.56154	4.39185	8.18047	4.49111	4.12969
1.00961	1.03962	1.21173	1	1.02843		6.55653	4.62956	8.19665	4.41618	4.12509
1.01639	1.03984	1.20004	1.02996	1.03452		6.55023	4.3545	8.09831	4.3158	4.13334
1.02067	1.04024	1.20279	1.05463	1.02807		6.54254	4.3993	8.23152	4.67596	4.06792
1.01983	1.03946	1.19515	1.0758	1.0327		6.53878	4.70947	8.17657	4.46766	4.12117
1.01835	1.0393	1.1932	1.0658	1.02638		6.54455	4.43124	8.18225	4.4118	4.12874
1.021	1.03963	1.1889	1.05359	1.02326		6.52936	4.46782	8.10076	4.29434	4.1275
1.0151	1.03851	1.19502	1.07743	1.03141		6.55186	4.52399	8.09633	4.39326	4.0532
1.01928	1.0391	1.19306	1.0776	1.03367		6.51841	4.39377	8.12074	4.34873	4.15495
1.02199	1.0368	1.19527	1.05834	1.02915		6.52791	4.57043	8.2771	4.4363	4.16785
1.01839	1.03753	1.19162	1.05676	1.02188		6.53669	4.45674	8.02291	4.42418	4.066
1.01404	1.03707	1.18825	1.07063	1.02609		6.52573	4.49768	8.13656	4.19415	4.12513
1.01422	1.03776	1.18877	1.0674	1.02869		6.54317	4.41565	8.18336	4.3737	4.13842
1.01178	1.03744	1.18769	1.0948	1.02375		6.52854	4.47459	8.00739	4.26851	4.22109
1.01562	1.03765	1.18647	1.05373	1.0266		6.50334	4.49759	8.15218	4.50012	4.20776
1.01143	1.03845	1.18685	1.06955	1.02191		6.50821	4.43527	8.12931	4.46112	4.14941
1.01876	1.03931	1.18389	1.0955	1.01601		6.52679	4.56585	8.14755	4.48262	4.18943
1.01954	1.0384	1.17815	1.10697	1.01721		6.51336	4.46418	8.06195	4.31381	4.21986
1.01573	1.03908	1.18059	1.08452	1.02456		6.52312	4.69187	8.26703	4.17783	4.23805
1.01724	1.03617	1.18161	1.04266	1.02525		6.52464	4.39415	8.15019	4.27623	4.18929
1.01672	1.0373	1.18249	1.07539	1.01757		6.50219	4.48996	8.22151	4.28196	4.15738
1.02331	1.03881	1.18276	1.05003	1.01486		6.49864	4.49864	8.10559	4.33735	4.14494
1.01873	1.03791	1.18601	1.06107	1.02486		6.50154	4.3653	8.22272	4.45744	4.19999
1.01975	1.03699	1.1941	1.03391	1.02879		6.48572	4.48607	8.04908	4.40034	4.12997
1.02189	1.03905	1.19962	1.06672	1.02776		6.51579	4.50035	8.16615	4.41388	4.10176
1.01896	1.0385	1.19779	1.07422	1.03279		6.51102	4.28527	8.12442	4.36034	4.1258
1.01693	1.03752	1.19413	1.05484	1.02284		6.49619	4.6984	8.20426	4.45734	4.16016
1.02118	1.03602	1.19053	1.06441	1.02357		6.51613	4.39075	7.99295	4.45014	4.16683
1.01424	1.03944	1.18755	1.05619	1.02318		6.4982	4.42992	8.1651	4.34651	4.17174
1.0154	1.03782	1.19233	1.04745	1.02757		6.48016	4.41509	8.03052	4.50449	4.11529
1.0121	1.03741	1.20343	1.06235	1.02346		6.46701	4.51001	8.10688	4.52431	4.08273
1.02222	1.03699	1.20255	1.09415	1.02921		6.49682	4.5304	8.21282	4.27798	4.08901
1.01253	1.03789	1.19732	1.04636	1.03263		6.4718	4.4507	8.06387	4.27068	4.07606
1.01947	1.03782	1.19272	1.06635	1.02893		6.49181	4.59088	8.17938	4.51169	4.11292
1.01828	1.03709	1.19638	1.0527	1.02879		6.47781	4.37696	8.16809	4.28346	4.19867
1.02112	1.04051	1.19064	1.08237	1.03568		6.46675	4.62535	8.11157	4.22246	4.17829
1.01133	1.03735	1.18799	1.08735	1.03674		6.47092	4.61961	7.91421	4.46546	4.09685
1.01189	1.03734	1.18226	1.07336	1.02997		6.45286	4.53247	8.08695	4.41787	4.10278
1.01158	1.03689	1.18433	1.07028	1.02627		6.46334	4.59928	8.10761	4.46198	4.14918
1.01599	1.03617	1.1821	1.05925	1.02804		6.45706	4.26432	8.10097	4.30309	4.19128
1.00969	1.03492	1.18742	1.04856	1.02481		6.46934	4.57293	8.25468	4.37219	4.22593
1.02258	1.03519	1.18515	1.04894	1.03303		6.44345	4.41712	8.10106	4.23549	4.2928
1.01599	1.0339	1.18343	1.05765	1.03724		6.44448	4.4389	8.15425	4.57045	4.30598
1.01286	1.03268	1.18474	1.06233	1.03564		6.43587	4.30194	8.00208	4.31657	4.40264
1.02149	1.03559	1.18009	1.03433	1.04096		6.40703	4.376	7.97469	4.37183	4.47582
1.00833	1.03572	1.17832	1.05911	1.03562		6.4104	4.54272	8.08096	4.28312	4.43822
1.0137	1.03459	1.19242	1.06549	1.04389		6.45702	4.4509	8.21863	4.23206	4.47405
1.00985	1.03615	1.19522	1.08309	1.03816		6.43729	4.40289	7.96072	4.38244	4.50399
1.01595	1.03628	1.2305	1.10555	1.0357		6.45714	4.44347	7.90862	4.49314	4.65983
1.01903	1.03368	1.23991	1.055	1.03685		6.43942	4.3834	8.08623	4.48142	4.58063
1.00875	1.0337	1.23816	1.08285	1.03198		6.46624	4.48281	7.97515	4.54411	4.62215
1.01234	1.03419	1.24225	1.07642	1.03961		6.44037	4.31924	8.23274	4.38658	4.60498
1.01406	1.03564	1.23663	1.02978	1.03007		6.46035	4.47823	8.00779	4.39939	4.53956
1.01643	1.03373	1.23689	1.05402	1.0301		6.45008	4.67036	8.21794	4.49972	4.49357
1.01282	1.03459	1.22664	1.08064	1.0313		6.44965	4.47234	8.07688	4.33439	4.3793
1.01257	1.03315	1.23054	1.04553	1.02514		6.4649	4.42795	8.05261	4.59005	4.3349
1.00992	1.03527	1.21538	1.06084	1.01973		6.45247	4.5254	8.23042	4.4222	4.42788
1.01352	1.03477	1.22267	1.04787	1.02361		6.43028	4.41206	8.04149	4.6678	4.36915
1.01333	1.03595	1.21744	1.0579	1.02902		6.45112	4.44843	7.96963	4.28715	4.33481
1.02078	1.03583	1.21551	1.07938	1.02196		6.46015	4.44807	8.11208	4.58054	4.20197
1.00984	1.03529	1.22088	1.07734	1.01953		6.43808	4.27344	8.02612	4.50921	4.22606
1.01618	1.03553	1.20849	1.0755	1.01531		6.4322	4.54823	8.05818	4.39054	4.29849
1.01274	1.03496	1.21339	1.03289	1.03109		6.43018	4.47841	8.04948	4.57134	4.21502
1.0072	1.03508	1.2148	1.02368	1.02618		6.44538	4.40795	8.12398	4.43084	4.12848
1.01199	1.03505	1.233	1.03185	1.01981		6.45037	4.49312	7.92941	4.36635	4.16905
1.00436	1.03467	1.26741	1.06286	1.02729		6.43981	4.57376	8.04213	4.4232	4.21863
1.0137	1.03255	1.28295	1.0771	1.02104		6.44543	4.34181	8.11816	4.35722	4.17952
1.01355	1.0344	1.29625	1.06156	1.0309		6.45121	4.70903	8.11739	4.64608	4.14247
1.01375	1.03229	1.30722	1.05331	1.02303		6.43049	4.39621	8.04213	4.48402	4.19896
1.01658	1.03198	1.31411	1.05475	1.01721		6.45592	4.47063	7.95196	4.32421	4.08645
1.02474	1.03297	1.32087	1.05052	1.01485		6.43199	4.31508	8.15009	4.4687	4.01392
1.01394	1.0328	1.32249	1.06096	1.01875		6.42848	4.546	8.10015	4.42195	4.10036
1.00906	1.03156	1.3161	1.03931	1.02823		6.42788	4.45014	8.02671	4.25295	4.14121
1.01411	1.03255	1.32152	1.07163	1.02074		6.44191	4.44247	8.04053	4.33211	4.13703
1.0145	1.03244	1.3269	1.04999	1.02623		6.44204	4.36184	8.02868	4.34311	4.13122
1.00836	1.03246	1.32109	1.07678	1.02527		6.46004	4.37904	7.90528	4.22954	4.09828
1.01679	1.03135	1.33118	1.07421	1.0288		6.46219	4.37858	8.01688	4.29734	4.07409
1.01342	1.03266	1.33841	1.07205	1.0267		6.46175	4.28548	8.007	4.61249	4.01543
1.01119	1.03126	1.34448	1.05732	1.02787		6.45856	4.43525	7.99726	4.59286	4.01846
1.0251	1.03058	1.34394	1.07588	1.0283		6.44926	4.43186	7.96624	4.42976	3.99728
1.01511	1.03181	1.34081	1.08396	1.0234		6.45331	4.49136	7.93153	4.48399	4.13778
1.01346	1.0303	1.33497	1.05919	1.02727		6.45191	4.45305	7.96336	4.21729	4.06914
1.02788	1.03171	1.33958	1.06281	1.03144		6.43246	4.36106	8.10994	4.50359	4.03967
1.0182	1.02977	1.34304	1.0662	1.03173		6.44515	4.48492	7.98956	4.4919	4.00837
1.01574	1.03118	1.34352	1.06222	1.02909		6.44025	4.28422	8.04444	4.58486	4.04322
1.0244	1.03089	1.33501	1.06168	1.01906		6.42886	4.46909	7.9521	4.50353	4.12784
1.01266	1.03105	1.3446	1.08603	1.02728		6.43226	4.52769	7.96953	4.41602	3.98879
1.01586	1.02951	1.35039	1.09709	1.02684		6.42521	4.2658	7.97345	4.32215	4.0163
1.00832	1.02951	1.34944	1.07412	1.02243		6.43223	4.46943	8.02992	4.33206	3.95296
1.0207	1.03094	1.33785	1.04946	1.02349		6.43979	4.43288	8.02536	4.48911	4.00788
1.0151	1.03138	1.35837	1.09162	1.0272		6.43706	4.44697	7.79714	4.38729	4.01066
1.01923	1.03038	1.35604	1.0908	1.0198		6.4202	4.55942	7.70837	4.61375	4.02458
1.02287	1.03142	1.35602	1.06422	1.02153		6.42454	4.28145	8.02555	4.57097	4.05482
1.01338	1.02932	1.35143	1.07677	1.02715		6.43786	4.44808	7.95914	4.56088	4.06014
1.01632	1.02857	1.35276	1.08555	1.02713		6.44204	4.39658	7.94257	4.63901	4.07157
1.01784	1.02945	1.35362	1.04307	1.02898		6.44336	4.4796	7.94506	4.39325	3.98199
1.02248	1.02897	1.35773	1.09124	1.02594		6.43606	4.4703	7.94689	4.54922	4.07918
1.01655	1.02812	1.34285	1.05374	1.03087		6.42763	4.42836	8.0253	4.38082	4.08194
1.01763	1.02858	1.34936	1.07541	1.02234		6.42554	4.21815	8.03707	4.56193	4.06078
1.01686	1.02974	1.3497	1.07864	1.01408		6.42077	4.47216	7.93979	4.53555	4.08645
1.01578	1.02761	1.35214	1.11569	1.02212		6.42407	4.39287	7.83925	4.19733	4.17602
1.01763	1.02886	1.34658	1.05575	1.01703		6.43132	4.44061	7.98097	4.5236	4.13629
1.00911	1.02981	1.35219	1.08608	1.01761		6.38103	4.41612	8.00536	4.38852	4.04409
1.02649	1.02948	1.36081	1.08843	1.01357		6.4008	4.50106	7.92521	4.35536	3.99022
1.01811	1.02845	1.35764	1.07405	1.02197		6.41314	4.49012	7.95804	4.3821	4.1034
1.02333	1.03189	1.35637	1.0883	1.01846		6.42416	4.24804	8.08951	4.54553	4.10008
1.01589	1.03006	1.36264	1.08415	1.01738		6.41328	4.31929	7.98362	4.31374	4.00311
1.01456	1.02919	1.35973	1.08108	1.01123		6.42758	4.50432	7.83545	4.54784	4.06541
1.0147	1.02875	1.36733	1.07972	1.01785		6.42913	4.3257	7.83177	4.41912	4.12205
1.01777	1.02834	1.36904	1.0981	1.01598		6.40726	4.44339	8.02983	4.30769	4.13594
1.0167	1.02835	1.36018	1.07961	1.0161		6.40227	4.55205	7.85997	4.27181	4.03465
1.01082	1.02957	1.35501	1.08423	1.01704		6.41073	4.50051	7.91795	4.31661	4.05961
1.02073	1.02963	1.35109	1.0922	1.01261		6.39896	4.45866	7.83935	4.38141	4.03515
1.02065	1.02976	1.36419	1.07122	1.01529		6.41785	4.18268	7.86765	4.28819	4.04617
1.01928	1.0276	1.35642	1.08713	1.00751		6.41402	4.34871	7.73394	4.41705	4.06324
1.01938	1.02902	1.35675	1.07716	1.00989		6.41501	4.43472	8.014	4.37471	4.13316
1.00189	1.02844	1.34353	1.08515	1.01052		6.41283	4.37059	7.75924	4.33808	4.13892
1.01888	1.0275	1.33443	1.05556	1.00627		6.39498	4.42454	7.89229	4.33124	4.08638
1.0203	1.02871	1.3327	1.09258	1.01033		6.41415	4.50514	7.94171	4.53751	4.11422
1.02004	1.02675	1.32064	1.09532	1.01927		6.40671	4.5116	8.00533	4.53772	4.04928
1.00591	1.02749	1.32441	1.07326	1.02357		6.41151	4.34942	7.98285	4.54439	4.0264
1.00961	1.02656	1.32049	1.08448	1.02176		6.41356	4.48451	8.11552	4.49828	4.01009
1.0146	1.02567	1.31331	1.05175	1.02758		6.4044	4.45783	7.94239	4.36138	4.02306
1.01974	1.02696	1.31433	1.07507	1.02217		6.40733	4.46748	7.77513	4.33011	4.04436
1.01238	1.02564	1.29844	1.08077	1.02158		6.42412	4.25501	7.89836	4.34457	4.02081
1.01501	1.0269	1.30288	1.08084	1.01438		6.41466	4.51617	8.01117	4.30614	4.04095
1.01812	1.02705	1.30379	1.09488	1.03026		6.41829	4.59554	7.94632	4.36604	4.06991
1.01435	1.02734	1.29286	1.10711	1.02894		6.39002	4.47028	8.03202	4.46962	4.09406
1.01734	1.02826	1.28719	1.09684	1.03148		6.41541	4.48726	7.87835	4.42162	4.01534
1.00991	1.02795	1.28745	1.0917	1.01926		6.40716	4.38282	7.82436	4.48345	4.12552
1.01353	1.02736	1.28095	1.08698	1.02289		6.3884	4.54221	7.81628	4.459	4.08591
1.01369	1.02606	1.27959	1.07551	1.01276		6.39436	4.4827	7.907	4.50705	4.13322
1.0145	1.02707	1.2685	1.10342	1.0236		6.3711	4.36619	7.9108	4.30201	4.02334
1.01602	1.02847	1.26898	1.09865	1.01325		6.40307	4.29643	7.79172	4.38414	4.05784
1.01479	1.02705	1.26907	1.07371	1.01003		6.39837	4.45137	7.93332	4.35134	4.1051
1.01723	1.02413	1.2697	1.07691	1.00748		6.38352	4.50188	7.983	4.54103	4.05541
1.02069	1.02456	1.26483	1.09276	1.0119		6.37456	4.30142	7.70504	4.3511	4.11187
1.01067	1.02448	1.26298	1.09761	1.00936		6.38019	4.44435	8.01771	4.38794	4.07167
1.00805	1.02605	1.25479	1.09189	1.01254		6.39428	4.50413	7.86871	4.27676	4.08045
1.01674	1.02257	1.25678	1.07754	1.00719		6.38432	4.55912	7.85688	4.32174	4.12161
1.01649	1.02663	1.2471	1.074	1.01508		6.38701	4.43075	7.89916	4.21589	4.13056
1.01571	1.02873	1.24788	1.07507	1.01168		6.37964	4.54984	7.83873	4.47871	4.11563
1.01136	1.02655	1.23277	1.08331	1.01677		6.36377	4.47415	7.96915	4.26726	4.07304
1.01196	1.02314	1.23926	1.12125	1.01767		6.36765	4.51374	7.95683	4.51348	4.07925
1.01314	1.02373	1.23406	1.0807	1.01739		6.36135	4.51539	7.78025	4.48104	4.10866
1.00548	1.0269	1.22765	1.04624	1.02098		6.36507	4.37952	7.78283	4.27275	4.14675
1.01338	1.02516	1.22926	1.10576	1.01306		6.35928	4.42453	7.844	4.18727	4.10015
1.02015	1.0248	1.22461	1.04035	1.01353		6.37162	4.39119	7.74537	4.39785	4.09499
1.01022	1.02559	1.22012	1.08186	1.00715		6.34731	4.41113	7.74957	4.55586	4.01949
1.00764	1.02668	1.21656	1.0896	1.00951		6.35722	4.4157	7.72567	4.2826	4.04932
1.01533	1.02736	1.2163	1.09297	1.00731		6.35853	4.31062	7.82097	4.35617	4.16395
1.01537	1.02643	1.20956	1.06361	1.0086		6.38517	4.30413	7.75641	4.55681	4.19488
1.01812	1.02639	1.20419	1.0911	1.0115		6.3775	4.45736	7.99908	4.28894	4.08667
1.01694	1.02593	1.20005	1.08241	1.01345		6.37104	4.42565	7.9097	4.34446	4.13239
1.01515	1.02806	1.20062	1.07247	1.01202		6.36257	4.34189	7.96272	4.43037	4.05544
1.0119	1.02557	1.19731	1.09343	1.00857		6.34849	4.41567	8.03026	4.57171	4.09773
1.01122	1.02668	1.19769	1.07006	1.02225		6.33137	4.33947	8.06113	4.58171	4.08948
1.01457	1.02758	1.18829	1.04554	1.01352		6.35083	4.27919	7.96464	4.50359	4.16127
1.01557	1.02326	1.17934	1.07951	1.01707		6.36506	4.34538	7.8338	4.55204	4.1818
1.01069	1.02596	1.17823	1.07002	1.01118		6.34325	4.43456	7.81783	4.46745	4.23092
1.01153	1.02652	1.17954	1.07327	1.02409		6.34727	4.53447	7.89048	4.38202	4.18308
1.02261	1.02608	1.17098	1.07298	1.01781		6.35513	4.52042	7.90049	4.56293	4.22212
1.02042	1.02523	1.1696	1.08915	1.01999		6.36121	4.35957	7.8918	4.57339	4.10625
1.01786	1.02748	1.16708	1.09969	1.01814		6.35859	4.33412	8.03049	4.56236	4.20947
1.01751	1.02746	1.15666	1.09921	1.02021		6.34372	4.35237	8.02948	4.52743	4.19302
1.01324	1.02669	1.15973	1.07056	1.02039		6.31637	4.34371	7.90301	4.56046	4.19768
1.01597	1.02761	1.14927	1.08298	1.01536		6.3306	4.42383	8.17423	4.34743	4.15717
1.01251	1.02873	1.1486	1.08995	1.01622		6.34865	4.28105	7.93658	4.53187	4.13964
1.01856	1.02513	1.1439	1.07734	1.01384		6.33125	4.34953	7.87763	4.53969	4.18122
1.01354	1.02445	1.14453	1.10869	1.01602		6.33196	4.36519	7.94696	4.28803	4.1509
1.0099	1.02682	1.14182	1.07411	1.01469		6.3178	4.46983	7.94612	4.55297	4.16495
1.00714	1.02622	1.14487	1.07394	1.01216		6.30946	4.45932	7.90726	4.43462	4.18286
1.00299	1.02553	1.14187	1.10234	1.01816		6.34625	4.39466	7.90958	4.48822	4.18716
1.01029	1.02554	1.13535	1.06344	1.01339		6.33268	4.48757	7.95383	4.3333	4.23245
1.01911	1.0224	1.12671	1.09128	1.01674		6.34574	4.33903	7.8978	4.41428	4.15752
1.0137	1.024	1.13513	1.12195	1.02337		6.3243	4.49125	7.80112	4.21026	4.20903
1.01442	1.02427	1.12104	1.06798	1.01012		6.33336	4.4786	7.98032	4.57289	4.22677
1.01645	1.02754	1.12243	1.08352	1.01527		6.31977	4.55862	8.0634	4.38813	4.19311
1.0162	1.0268	1.12488	1.10674	1.01538		6.31055	4.49065	7.84009	4.21792	4.18494
1.01271	1.02677	1.11916	1.04576	1.01025		6.28822	4.25662	7.9235	4.16978	4.14314
1.02206	1.02618	1.12123	1.07827	1.0171		6.30208	4.45435	7.99514	4.45802	4.11024
1.00968	1.02245	1.11671	1.06463	1.01163		6.31984	4.32347	7.8958	4.36356	4.14892
1.01599	1.02501	1.11719	1.10992	1.00969		6.30135	4.26751	7.72445	4.55452	4.1489
1.00907	1.02386	1.11679	1.09107	1.00309		6.30693	4.35567	7.922	4.49395	4.13644
1.01202	1.02291	1.11866	1.09483	1.00959		6.30294	4.47595	7.91634	4.39623	4.13608
1.00818	1.02375	1.10584	1.11138	1		6.29903	4.39491	7.84726	4.25166	4.13856
1.02316	1.02345	1.11109	1.09539	1.0062		6.3165	4.31797	7.91812	4.35926	4.17586
1.01531	1.0225	1.11361	1.11314	1.00596		6.29492	4.44938	8.03988	4.4585	4.14106
