# Supplementary material for: UBR-1 deficiency leads to ivermectin resistance in Caenorhabditis elegans
Source: eLife journal article supplement (doi:10.7554/elife.103718), 2024-12-13
Supplement: data1 [file Figure 5-source data 2(B).xlsx]

## Sheet: Sheet1
WT 0mM 5-HT						WT 5mM 5-HT						WT 10mM 5-HT						WT 20mM 5-HT						WT 40mM 5-HT						WT 80mM 5-HT
1.01486	1.14935	1.26575	1.26859	1.11092		1.11141	1.12154	1.01765	1.01242	1.03784		1.25697	1.02092	1.0926	1.03773	1.09652		1.05865	1.37839	1.07238	1.6054	1.04481		1.06875	1.18525	1.12987	1.07025	1.07708		1.12407	1.08433	1.09991	1.13538	1.20175
1.0231	1.14731	1.26224	1.26432	1.10488		1.10866	1.15183	1.01462	1.01565	1.05789		1.24962	1.00151	1.09264	1.04202	1.10119		1.05989	1.48285	1.11063	1.65268	1.0252		1.07463	1.18427	1.12443	1.07491	1.10532		1.11824	1.09089	1.05137	1.14295	1.19584
1.01612	1.14861	1.26116	1.28814	1.11305		1.09186	1.15426	1.00572	1.00609	1.05327		1.23865	1.01153	1.09966	1.05079	1.11248		1.06648	1.39477	1.06167	1.64142	1.05343		1.08563	1.18339	1.12577	1.06623	1.12897		1.13414	1.09111	1.10078	1.12905	1.15415
1.02178	1.14665	1.28043	1.2732	1.10657		1.10406	1.14727	1.01516	1.02349	1.05587		1.2316	1.01248	1.08942	1.03619	1.08372		1.07726	1.43839	1.1142	1.66034	1.05357		1.04949	1.1836	1.11843	1.07222	1.0989		1.13088	1.09579	1.03751	1.14	1.22033
1.02725	1.14822	1.27845	1.2996	1.11302		1.09987	1.15023	1.0076	1.01768	1.03863		1.22961	1.00034	1.07627	1.02486	1.08477		1.0778	1.3785	1.08754	1.65223	1.01693		1.12493	1.18217	1.12113	1.07228	1.12636		1.11842	1.09933	1.06241	1.11786	1.17939
1.0195	1.14633	1.27497	1.25691	1.11213		1.11687	1.12911	1.01015	1.01684	1.05981		1.22755	1.02013	1.07858	1.01644	1.09642		1.0791	1.44553	1.0923	1.64943	1.04704		1.09194	1.17961	1.12559	1.0722	1.14522		1.13465	1.10425	1.06764	1.12208	1.1038
1.01759	1.14463	1.27174	1.26643	1.11158		1.1599	1.13429	1.00759	1.0244	1.03802		1.27094	1.01856	1.06422	1.00657	1.10347		1.07931	1.53898	1.10743	1.63373	1.0921		1.07238	1.1818	1.11992	1.07309	1.12786		1.11509	1.10661	1.06485	1.1385	1.19564
1.01523	1.14723	1.26509	1.24901	1.11597		1.12221	1.12861	1.01167	1.0058	1.06932		1.31085	1.01519	1.08119	1.01795	1.1221		1.08277	1.36441	1.09214	1.6413	1.08323		1.11063	1.17737	1.11754	1.07641	1.13359		1.11457	1.14188	1.06953	1.14562	1.18721
1.01844	1.14802	1.27179	1.26584	1.11776		1.13402	1.1042	1.01252	1.01768	1.05878		1.31366	1.02265	1.08726	1.03149	1.11057		1.08266	1.38657	1.11443	1.63516	1.06827		1.06167	1.17431	1.12053	1.07967	1.14522		1.11719	1.14642	1.08116	1.12978	1.194
1.02333	1.14795	1.27191	1.29005	1.11438		1.16968	1.11609	1.00899	1.01635	1.09289		1.3047	1.01064	1.0745	1.02123	1.11643		1.09416	1.47879	1.10818	1.60259	1.07999		1.1142	1.1718	1.12097	1.07819	1.15483		1.09949	1.14493	1.08754	1.09263	1.0325
1.01751	1.14723	1.26632	1.27613	1.11185		1.20689	1.13772	1.00689	1.01633	1.08444		1.29518	1.01583	1.08758	1.04692	1.108		1.10082	1.54558	1.14642	1.59819	1.02226		1.08754	1.1762	1.12263	1.07841	1.1237		1.10785	1.15671	1.07699	1.08553	1.2464
1.02882	1.14469	1.27351	1.28363	1.11741		1.16536	1.14193	1.0039	1.01229	1.03119		1.28751	1.02192	1.08261	1.02782	1.09494		1.09185	1.4561	1.13736	1.61139	1.00859		1.0923	1.17213	1.11857	1.07596	1.13054		1.11801	1.14749	1.14741	1.14258	1.1439
1.02579	1.14665	1.27046	1.27623	1.11254		1.22014	1.14378	1.00706	1.01429	1.04785		1.27069	1.0124	1.08224	1.03876	1.11408		1.09767	1.31872	1.0888	1.59351	1.00534		1.10743	1.17306	1.1179	1.07701	1.0885		1.11225	1.14641	1.03999	1.16342	1.14648
1.02029	1.14728	1.26604	1.26041	1.11568		1.15942	1.13424	1.0011	1.0158	1.06864		1.2606	1.01313	1.07793	1.03337	1.10591		1.08767	1.45862	1.08379	1.59031	1.0103		1.09214	1.17154	1.11963	1.07601	1.14029		1.12586	1.13926	1.07544	1.14538	1.20406
1.02053	1.14688	1.26266	1.25318	1.11257		1.17978	1.13392	1.01355	1.01228	1.06062		1.25497	1.01885	1.07014	1.0301	1.1032		1.0892	1.42962	1.09935	1.58709	1.02896		1.11443	1.16864	1.12083	1.07199	1.13922		1.10995	1.13738	1.11993	1.15141	1.16817
1.01865	1.14472	1.26295	1.26554	1.12167		1.19284	1.1314	1.01147	1.00465	1.08202		1.25037	1.01713	1.07975	1.03713	1.10847		1.09859	1.44251	1.1651	1.60765	1.05685		1.10818	1.16882	1.12351	1.07597	1.07156		1.10272	1.12867	1.10451	1.1403	1.17912
1.02119	1.14629	1.26667	1.24392	1.11996		1.2227	1.16664	1.0165	1.0252	1.10038		1.23484	1.00713	1.08008	1.03503	1.10156		1.09681	1.45535	1.22335	1.61387	1.04305		1.14642	1.17088	1.12216	1.07277	1.12214		1.10833	1.13803	1.08335	1.11545	1.16298
1.02354	1.14487	1.27057	1.28374	1.11593		1.21175	1.20568	1.01541	1.02545	1.08784		1.24154	1.00212	1.09061	1.04059	1.09493		1.08726	1.42654	1.22713	1.61029	1.042		1.13736	1.17002	1.12284	1.07046	1.1246		1.09734	1.13119	1.10357	1.12706	1.18907
1.02017	1.14349	1.27448	1.24775	1.11917		1.22096	1.20689	1.01398	1.01636	1.04961		1.24038	1.01922	1.09394	1.02792	1.08357		1.09632	1.31634	1.26888	1.58155	1.05255		1.0888	1.16937	1.11775	1.0686	1.1031		1.11186	1.12529	1.06728	1.09334	1.143
1.01387	1.14504	1.27131	1.24301	1.12414		1.22259	1.21336	1.0189	1.0212	1.06859		1.2968	1.02119	1.09872	1.03731	1.08087		1.09613	1.35219	1.3077	1.57955	1.02103		1.08379	1.1657	1.11894	1.06798	1.11495		1.13427	1.11542	1.07477	1.07981	1.13776
1.0232	1.1474	1.28191	1.24838	1.11485		1.15225	1.20913	1.01301	1.0213	1.0686		1.33011	1.00975	1.10273	1.02412	1.08244		1.07914	1.43901	1.23477	1.57984	1.02294		1.09935	1.16711	1.12535	1.07725	1.15023		1.14252	1.10983	1.0855	1.09789	1.21206
1.01403	1.14605	1.28626	1.28175	1.12065		1.17858	1.19785	1.01344	1.01045	1.06445		1.33278	1.02051	1.08808	1.04328	1.10537		1.07986	1.39362	1.22592	1.57114	1.0411		1.1651	1.16627	1.12778	1.06953	1.12851		1.12505	1.1168	1.12221	1.12068	1.20266
1.01779	1.14414	1.28296	1.2758	1.12017		1.17326	1.20134	1.00707	1.00886	1.05735		1.31894	1.02265	1.09004	1.03757	1.09724		1.08041	1.40456	1.25034	1.60781	1.01802		1.22335	1.16642	1.12347	1.07538	1.09384		1.11735	1.12408	1.14761	1.15579	1.14818
1.01168	1.14514	1.28173	1.22607	1.11454		1.17764	1.19	1.00936	1.02482	1.08134		1.3112	1.02434	1.09285	1.04745	1.09516		1.08525	1.3974	1.20511	1.59612	1.01559		1.22713	1.16425	1.12161	1.07642	1.11973		1.1139	1.10438	1.1074	1.1431	1.1652
1.01271	1.14275	1.28077	1.26724	1.11385		1.15165	1.17286	1.01836	1.03329	1.07167		1.30017	1.01897	1.09327	1.01287	1.0966		1.08035	1.43148	1.19948	1.56406	1		1.26888	1.16462	1.12101	1.07342	1.13405		1.12805	1.10879	1.14049	1.096	1.16539
1.01793	1.14433	1.28318	1.24849	1.10973		1.17256	1.17754	1.01933	1.01378	1.02789		1.29447	1.018	1.08932	1.02384	1.08544		1.08033	1.44265	1.2255	1.5733	1.03302		1.3077	1.16236	1.12209	1.07043	1.14515		1.11326	1.10108	1.09042	1.14319	1.1556
1.01737	1.14746	1.28893	1.28734	1.11867		1.15308	1.16603	1.01762	1.01731	1.05473		1.28234	1.01959	1.11348	1.02745	1.11109		1.07695	1.42647	1.32203	1.56642	1.0354		1.23477	1.16205	1.11705	1.07279	1.13364		1.11479	1.10585	1.08985	1.0983	1.19022
1.01108	1.14725	1.28159	1.28019	1.10992		1.13349	1.14975	1.02012	1.01845	1.03012		1.26908	1.01856	1.10147	1.02457	1.09978		1.07451	1.4206	1.30067	1.55429	1.01757		1.22592	1.15857	1.11463	1.07117	1.14969		1.12264	1.09723	1.08208	1.16586	1.25257
1.02153	1.14665	1.2936	1.27265	1.1071		1.14319	1.16273	1.01626	1.01506	1.07996		1.27002	1.02067	1.0911	1.03662	1.10485		1.07126	1.39992	1.424	1.57705	1.00686		1.25034	1.15858	1.11088	1.07469	1.11935		1.12454	1.09578	1.09256	1.1233	1.19261
1.02055	1.1461	1.28198	1.24979	1.10902		1.13262	1.16125	1.0255	1.00709	1.08656		1.25396	1.00879	1.10636	1.02147	1.08127		1.068	1.40982	1.4359	1.54909	1.03462		1.20511	1.1599	1.10526	1.07574	1.16345		1.11881	1.09473	1.07616	1.13269	1.21845
1.0222	1.14609	1.27837	1.28941	1.10191		1.096	1.15357	1.02569	1.02192	1.06248		1.25456	1.01467	1.09293	1.01768	1.08898		1.08865	1.43431	1.44892	1.56164	1.03686		1.19948	1.15542	1.1026	1.07467	1.13078		1.12481	1.10749	1.07339	1.16701	1.19158
1.02336	1.14657	1.28243	1.26006	1.10756		1.08575	1.14064	1.01699	1.01649	1.05984		1.2647	1.01925	1.08649	1.01964	1.11803		1.0921	1.41042	1.53206	1.5647	1.0556		1.2255	1.15849	1.10452	1.07488	1.07993		1.11293	1.11912	1.10983	1.11603	1.16853
1.02458	1.14658	1.28859	1.27133	1.10918		1.09285	1.16108	1.0295	1.01192	1.06985		1.26071	1.01318	1.08506	1.03272	1.09448		1.07106	1.39544	1.49082	1.53185	1.03879		1.32203	1.15698	1.10444	1.07289	1.18015		1.1135	1.12046	1.10293	1.12172	1.27799
1.03133	1.14813	1.28175	1.2541	1.11042		1.1024	1.17346	1.01757	1.01391	1.07655		1.24756	1.02806	1.09889	1.04137	1.09529		1.0692	1.43447	1.41154	1.53869	1.04752		1.30067	1.15614	1.10566	1.0702	1.16818		1.11564	1.11923	1.10029	1.10761	1.16113
1.01585	1.14589	1.27884	1.24643	1.11454		1.09409	1.16237	1.02781	1.00621	1.0648		1.24681	1.0228	1.08952	1.04577	1.12055		1.06937	1.42186	1.54376	1.55557	1.04794		1.424	1.15481	1.10418	1.06932	1.08136		1.11285	1.11292	1.11311	1.14119	1.24263
1.02123	1.14518	1.2799	1.26073	1.10573		1.08739	1.16549	1.02002	1.02709	1.06216		1.23535	1.0176	1.10967	1.00964	1.10106		1.06455	1.36553	1.38667	1.56998	1.08326		1.4359	1.15246	1.1055	1.06987	1.0816		1.10918	1.11367	1.12412	1.14794	1.26113
1.02643	1.14773	1.2797	1.24886	1.10496		1.09354	1.1702	1.02783	1.02381	1.04752		1.23195	1.02124	1.10169	1.02766	1.0803		1.07257	1.2609	1.37454	1.56859	1.0424		1.44892	1.15008	1.11025	1.06976	1.14298		1.11003	1.10298	1.09889	1.11081	1.16946
1.02396	1.14464	1.28045	1.24252	1.10327		1.07018	1.14728	1.02251	1.008	1.05197		1.21555	1.02515	1.10155	1.0373	1.09428		1.0704	1.39446	1.39993	1.5829	1.04523		1.53206	1.1497	1.10817	1.07346	1.12948		1.1214	1.10927	1.02539	1.08692	1.25888
1.02476	1.14497	1.27155	1.27001	1.09887		1.07706	1.17473	1.01327	1.00972	1.06835		1.22065	1.0236	1.0994	1.03917	1.07919		1.08366	1.35752	1.35583	1.5678	1.06233		1.49082	1.14814	1.10717	1.07229	1.1175		1.11511	1.11682	1.07874	1.14661	1.20372
1.0218	1.14644	1.28659	1.29036	1.1079		1.05724	1.16587	1.02685	1.01731	1.07057		1.21308	1.02007	1.09631	1.02519	1.09561		1.08076	1.37857	1.33546	1.56508	1.01789		1.41154	1.14799	1.10231	1.06999	1.08551		1.1129	1.10874	1.08116	1.17463	1.14175
1.01769	1.14441	1.27933	1.25094	1.10598		1.05539	1.17595	1.02428	1.02632	1.08498		1.20702	1.01861	1.10988	1.01104	1.12027		1.07965	1.36135	1.29523	1.56501	1.05742		1.54376	1.14663	1.10071	1.07187	1.10468		1.10822	1.1181	1.10214	1.09803	1.16543
1.0281	1.14455	1.28201	1.25979	1.10712		1.07553	1.17722	1.03295	1.01853	1.09573		1.20496	1.02581	1.10655	1.05077	1.10742		1.06407	1.38023	1.27873	1.56695	1.02875		1.38667	1.14527	1.10287	1.07336	1.13281		1.11087	1.11169	1.06058	1.12378	1.28486
1.03045	1.14264	1.27352	1.27898	1.10655		1.06402	1.16379	1.02628	1.01429	1.08902		1.19956	1.02419	1.10474	1.04207	1.11435		1.0539	1.31857	1.22668	1.553	1.03689		1.37454	1.14581	1.09905	1.07367	1.08769		1.10247	1.10295	1.0587	1.14875	1.1213
1.02369	1.14405	1.26404	1.29914	1.10146		1.05126	1.18952	1.02107	1.01519	1.08839		1.18957	1.02434	1.11158	1.03303	1.08778		1.04858	1.28706	1.24502	1.53477	1.02819		1.39993	1.14397	1.10315	1.07156	1.14913		1.11142	1.10755	1.10768	1.12374	1.10555
1.02354	1.14425	1.27624	1.24614	1.10679		1.06689	1.23053	1.02815	1.01333	1.09803		1.1843	1.02627	1.10603	1.01194	1.13879		1.04934	1.27778	1.27914	1.54334	1.06058		1.35583	1.14357	1.10038	1.07081	1.1339		1.10659	1.10475	1.11545	1.14697	1.21868
1.02008	1.14482	1.27435	1.28714	1.10174		1.09748	1.23209	1.02622	1.01607	1.10021		1.18015	1.02388	1.10593	1.03068	1.11712		1.05862	1.30398	1.34283	1.53666	1.05045		1.33546	1.14275	1.10082	1.0717	1.15806		1.09896	1.10711	1.0361	1.16404	1.27257
1.02083	1.14406	1.27939	1.25027	1.10191		1.08788	1.22848	1.03089	1.00953	1.11694		1.17146	1.02228	1.11266	1.04618	1.09781		1.06635	1.24727	1.42332	1.54655	1.05684		1.29523	1.14285	1.09917	1.06501	1.17179		1.11377	1.10646	1.08282	1.08546	1.21636
1.02521	1.14485	1.28618	1.22551	1.10405		1.08254	1.23365	1.02587	1.01789	1.07845		1.17136	1.02758	1.11038	1.04258	1.114		1.06546	1.29139	1.38442	1.52674	1.05181		1.27873	1.1392	1.10032	1.06917	1.18082		1.11234	1.11352	1.08495	1.12953	1.20643
1.0245	1.14318	1.30708	1.28152	1.10485		1.09433	1.20788	1.02414	1.025	1.08592		1.16982	1.03108	1.10617	1.02473	1.10341		1.06083	1.12636	1.49199	1.5361	1.08966		1.22668	1.13807	1.10171	1.07497	1.12999		1.11112	1.11307	1.12546	1.17078	1.16941
1.01744	1.14523	1.31229	1.28279	1.09909		1.07765	1.20324	1.02873	1.01603	1.05191		1.16114	1.03076	1.09804	1.03245	1.10159		1.05325	1.19225	1.45081	1.51598	1.02479		1.24502	1.14047	1.0982	1.07286	1.13203		1.11912	1.11261	1.08229	1.09239	1.30977
1.02346	1.14376	1.31987	1.23355	1.09861		1.10152	1.19412	1.03368	1.01677	1.05672		1.16424	1.0038	1.11277	1.04409	1.1059		1.05704	1.25819	1.45914	1.53828	1.03383		1.27914	1.13675	1.09965	1.07246	1.11896		1.11579	1.11372	1.10867	1.17634	1.20776
1.02383	1.14394	1.31548	1.26606	1.10722		1.06353	1.20831	1.02525	1.01865	1.03977		1.16217	1.02081	1.12379	1.01444	1.11939		1.07014	1.24867	1.4288	1.54424	1.07905		1.34283	1.13617	1.09957	1.06725	1.14155		1.10688	1.11551	1.1194	1.13585	1.16674
1.02262	1.14532	1.30927	1.25243	1.10957		1.07005	1.24884	1.02662	1.00984	1.06172		1.15478	1.02643	1.12486	1.03257	1.11218		1.07694	1.32033	1.42924	1.581	1.06215		1.42332	1.13623	1.09814	1.06482	1.13752		1.10365	1.11799	1.06699	1.10708	1.23881
1.02263	1.14425	1.31593	1.25872	1.10308		1.04971	1.28108	1.0259	1.02855	1.047		1.15447	1.01153	1.12465	1.02337	1.11777		1.06766	1.2634	1.4402	1.57126	1.02866		1.38442	1.13253	1.09851	1.06954	1.16501		1.10683	1.11209	1.10284	1.058	1.27554
1.02425	1.14206	1.31267	1.26186	1.10761		1.0539	1.27623	1.02468	1.02244	1.06188		1.14526	1.02817	1.13062	1.0405	1.12449		1.06187	1.26335	1.45202	1.5658	1.0306		1.49199	1.13193	1.09507	1.07406	1.08917		1.11373	1.1232	1.12323	1.12965	1.24111
1.02098	1.14196	1.30102	1.24465	1.10163		1.04299	1.27723	1.03761	1.0106	1.05906		1.13754	1.01934	1.1269	1.04983	1.11169		1.0602	1.34604	1.40208	1.58416	1.06038		1.45081	1.12856	1.09483	1.07155	1.09735		1.10665	1.11721	1.0996	1.08597	1.23252
1.02647	1.1433	1.30676	1.21651	1.11196		1.07229	1.2791	1.02988	1.01688	1.04831		1.13881	1.02399	1.13154	1.04147	1.10818		1.05818	1.26772	1.3764	1.55376	1.04747		1.45914	1.1292	1.09692	1.07268	1.0856		1.10873	1.1232	1.0731	1.10995	1.19775
1.00946	1.14067	1.30624	1.23402	1.11149		1.069	1.25897	1.01999	1.01966	1.05868		1.13665	1.01185	1.12943	1.0308	1.11012		1.05994	1.37911	1.34631	1.58262	1.03796		1.4288	1.12913	1.0976	1.07845	1.10021		1.11166	1.11967	1.07129	1.10252	1.15085
1.01789	1.1387	1.28889	1.23027	1.10496		1.06554	1.24906	1.02624	1.01942	1.09414		1.12962	1.02498	1.12063	1.04398	1.12321		1.06027	1.28055	1.32728	1.56076	1.04487		1.42924	1.12714	1.09488	1.08049	1.11838		1.11857	1.11926	1.0716	1.15687	1.22379
1.01975	1.14278	1.29699	1.25477	1.10843		1.05042	1.22648	1.02403	1.01508	1.08355		1.12966	1.02675	1.12137	1.0257	1.10825		1.06271	1.2742	1.24247	1.53956	1.08505		1.4402	1.12772	1.09452	1.07415	1.11278		1.11271	1.13468	1.06213	1.14902	1.18869
1.01953	1.14013	1.28652	1.20612	1.11126		1.07775	1.21833	1.02895	1.02009	1.06242		1.12048	1.01042	1.1196	1.02151	1.11523		1.06367	1.28664	1.30032	1.06644	1.0518		1.45202	1.12944	1.0952	1.07279	1.05862		1.11204	1.13638	1.10497	1.07436	1.18892
1.01715	1.14213	1.28751	1.2346	1.10464		1.06412	1.21284	1.03125	1.00919	1.05267		1.12046	1.0257	1.1249	1.03383	1.10675		1.06716	1.24705	1.24336	1.03328	1.06565		1.40208	1.12714	1.09529	1.08189	1.09459		1.10328	1.1384	1.12222	1.1092	1.19068
1.01792	1.14056	1.29309	1.24476	1.10546		1.067	1.21536	1.02275	1.01885	1.08939		1.12345	1.02406	1.11597	1.04217	1.12278		1.06421	1.30167	1.18768	1	1.08154		1.3764	1.12846	1.09245	1.0752	1.12095		1.11286	1.13865	1.08326	1.18187	1.11712
1.02052	1.14042	1.27666	1.24602	1.10437		1.07486	1.19394	1.02873	1.01291	1.06614		1.11652	1.02272	1.11839	1.02979	1.14297		1.05943	1.2829	1.20867	1.20714	1.05343		1.34631	1.12611	1.09197	1.0791	1.099		1.10011	1.14414	1.1182	1.14008	1.21153
1.01499	1.13948	1.28538	1.26823	1.11087		1.03662	1.18752	1.02658	1.02764	1.05972		1.11373	1.00143	1.11847	1.02851	1.13064		1.05123	1.19599	1.22357	1.37671	1.10886		1.32728	1.12557	1.09014	1.08119	1.117		1.1019	1.13564	1.15504	1.17753	1.16
1.03197	1.14183	1.27954	1.25059	1.10712		1.02705	1.17342	1.02996	1.02448	1.04521		1.11365	1.02303	1.11402	1.01061	1.10829		1.05345	1.19865	1.16274	1.31528	1.07749		1.24247	1.12473	1.08995	1.07535	1.13354		1.11469	1.13607	1.09372	1.14619	1.26954
1.02161	1.14258	1.29049	1.26435	1.11128		1.04145	1.16388	1.02315	1.02874	1.04258		1.11287	1.01367	1.12096	1.03599	1.11855		1.06126	1.22844	1.16467	1.34172	1.06374		1.30032	1.12304	1.09003	1.07811	1.17232		1.11059	1.13418	1.06579	1.12131	1.24614
1.01703	1.14062	1.28272	1.26184	1.09785		1.04062	1.15747	1.02379	1.01359	1.05698		1.12093	1.02462	1.11819	1.0404	1.12626		1.06202	1.31501	1.14658	1.32647	1.0521		1.24336	1.1239	1.09587	1.07451	1.12705		1.10355	1.1325	1.1125	1.17023	1.15407
1.01282	1.14203	1.28216	1.25705	1.10887		1.03156	1.14516	1.03692	1.01652	1.0793		1.11782	1.03095	1.10787	1.03233	1.12824		1.05409	1.30343	1.15349	1.32615	1.05991		1.18768	1.12209	1.09776	1.07621	1.10656		1.10839	1.13502	1.05686	1.15381	1.18036
1.01746	1.14072	1.28175	1.20877	1.10793		1.02761	1.15109	1.03539	1.02533	1.10009		1.11742	1.02754	1.10073	1.0441	1.11704		1.06458	1.24174	1.14037	1.3402	1.06184		1.20867	1.12362	1.0955	1.07093	1.10109		1.1304	1.13389	1.10132	1.16309	1.23047
1.03072	1.1399	1.28063	1.26094	1.11067		1.01378	1.1413	1.0382	1.02697	1.11578		1.11391	1.02831	1.11237	1.02895	1.12576		1.06459	1.1837	1.14002	1.34916	1.09009		1.22357	1.12322	1.09365	1.0708	1.1545		1.12512	1.14953	1.05804	1.11656	1.15294
1.01579	1.14002	1.28079	1.25122	1.10389		1.00899	1.12603	1.03708	1.02662	1.10586		1.10591	1.03338	1.10788	1.03689	1.12151		1.07126	1.20117	1.1684	1.369	1.08736		1.16274	1.12079	1.08707	1.08295	1.11669		1.11962	1.15482	1.11104	1.14617	1.17341
1.02097	1.14068	1.28305	1.24988	1.10801		1.0371	1.11888	1.02274	1.02434	1.09028		1.10798	1.03621	1.09786	1.04897	1.12744		1.07026	1.13202	1.15605	1.40823	1.06259		1.16467	1.1214	1.0858	1.07402	1.08819		1.11207	1.15202	1.13473	1.1314	1.31688
1.02243	1.14151	1.27803	1.24066	1.1053		1.00922	1.12828	1.022	1.01528	1.07152		1.10977	1.02869	1.11235	1.04846	1.12225		1.06252	1.18789	1.12883	1.3941	1.06398		1.14658	1.11824	1.08644	1.0758	1.13763		1.10771	1.14204	1.0972	1.0796	1.20262
1.01506	1.13973	1.27944	1.26353	1.10213		1.02788	1.12437	1.03669	1.02469	1.04767		1.10573	1.01992	1.10044	1.03585	1.12453		1.0584	1.15115	1.15888	1.39016	1.06951		1.15349	1.11906	1.08378	1.0718	1.11994		1.09565	1.1401	1.13023	1.13061	1.24195
1.03026	1.1448	1.28522	1.23467	1.10186		1.02655	1.10919	1.03028	1.01948	1.0717		1.10801	1.02535	1.11215	1.03532	1.13582		1.05495	1.20126	1.12591	1.40286	1.08597		1.14037	1.11813	1.08972	1.07065	1.10743		1.11262	1.13464	1.10295	1.16989	1.26321
1.01841	1.14143	1.28221	1.23979	1.10496		1.01761	1.13864	1.03197	1.02704	1.07295		1.1045	1.0242	1.12519	1.03944	1.13094		1.06419	1.2465	1.09192	1.40784	1.06179		1.14002	1.11902	1.09653	1.07448	1.06947		1.10413	1.14288	1.10228	1.1429	1.22918
1.01704	1.14067	1.27724	1.24896	1.10453		1.02333	1.1611	1.04122	1.02904	1.04923		1.10106	1.00839	1.12623	1.04209	1.14724		1.07471	1.17561	1.10932	1.35714	1.06206		1.1684	1.11557	1.09537	1.07655	1.1176		1.10179	1.14309	1.1307	1.13958	1.22722
1.01831	1.14225	1.27915	1.24303	1.10841		1.015	1.15377	1.02981	1.02838	1.05868		1.10096	1.0316	1.1274	1.0473	1.11999		1.06789	1.19204	1.11542	1.36896	1.03549		1.15605	1.1165	1.09647	1.07712	1.10152		1.10687	1.15204	1.07449	1.15352	1.26938
1.02275	1.14015	1.27402	1.26384	1.10457		1	1.15108	1.03686	1.02214	1.07003		1.09691	1.00809	1.13059	1.04541	1.13276		1.0608	1.15155	1.10806	1.3613	1.05903		1.12883	1.11612	1.09275	1.07693	1.09769		1.10374	1.14951	1.08384	1.10385	1.19617
1.02777	1.14102	1.274	1.2461	1.10408		1.04487	1.15166	1.03521	1.014	1.07167		1.09717	1.03314	1.12334	1.01884	1.11964		1.0524	1.23778	1.08664	1.37452	1.07677		1.15888	1.11214	1.08971	1.07491	1.13867		1.1082	1.15488	1.08513	1.14643	1.28679
1.01266	1.14046	1.28225	1.23271	1.09708		1.01852	1.14225	1.03873	1.02136	1.07863		1.09631	1.03144	1.11938	1.02276	1.10601		1.05541	1.20886	1.11218	1.39175	1.0448		1.12591	1.11405	1.088	1.07511	1.14303		1.11663	1.148	1.07555	1.15563	1.19734
1.02221	1.14093	1.29461	1.25998	1.10431		1.02103	1.12674	1.04069	1.01263	1.06037		1.09294	1.0281	1.1121	1.06861	1.12633		1.05038	1.16976	1.12044	1.41592	1.06472		1.09192	1.1115	1.08725	1.07161	1.07535		1.11805	1.13794	1.07572	1.12942	1.28393
1.02019	1.14223	1.28932	1.25204	1.1045		1.03805	1.12233	1.04158	1.01275	1.08053		1.08417	1.0263	1.10149	1.05008	1.14024		1.05218	1.18233	1.0886	1.33459	1.0547		1.10932	1.11342	1.08384	1.07546	1.07594		1.12845	1.14359	1.11118	1.16638	1.25077
1.02626	1.13916	1.28551	1.26036	1.10947		1.03396	1.12497	1.02756	1.01352	1.08518		1.07811	1.02456	1.1214	1.05421	1.11305		1.05774	1.11779	1.08583	1.38353	1.0664		1.11542	1.11299	1.0837	1.06569	1.06981		1.1193	1.14286	1.14172	1.16036	1.27563
1.01944	1.14247	1.29114	1.2391	1.10646		1.03708	1.12887	1.02882	1.02667	1.10668		1.07743	1.03078	1.12227	1.05087	1.11745		1.05203	1.16123	1.13473	1.40764	1.0934		1.10806	1.11256	1.08099	1.07162	1.08138		1.12094	1.13711	1.05431	1.09966	1.19859
1.01823	1.14148	1.29371	1.23338	1.10642		1.0694	1.13723	1.04008	1.02011	1.09501		1.07629	1.02198	1.12268	1.05855	1.12573		1.05911	1.15854	1.12482	1.44487	1.07378		1.08664	1.11	1.08405	1.06608	1.15781		1.1198	1.13532	1.04446	1.09139	1.19731
1.02153	1.14094	1.29249	1.23197	1.09988		1.04558	1.13088	1.03899	1.02316	1.0755		1.07762	1.03131	1.12324	1.03019	1.13871		1.06059	1.20054	1.10736	1.36634	1.06397		1.11218	1.10987	1.07952	1.06032	1.07525		1.11045	1.13954	1.07846	1.1275	1.26507
1.01752	1.13905	1.29906	1.19442	1.10496		1.06413	1.1134	1.0297	1.03195	1.07842		1.07188	1.02927	1.12695	1.05763	1.13047		1.04427	1.20999	1.07547	1.32823	1.04945		1.12044	1.10981	1.08238	1.06031	1.15361		1.10848	1.14532	1.10847	1.13729	1.26906
1.01738	1.13988	1.28126	1.26136	1.09881		1.06177	1.10247	1.04282	1.01503	1.0867		1.06853	1.03034	1.11637	1.03147	1.14239		1.06575	1.2296	1.09276	1.34918	1.04695		1.0886	1.10892	1.0841	1.06016	1.09293		1.10153	1.14142	1.12481	1.17237	1.26374
1.02105	1.13834	1.29137	1.24054	1.10826		1.09293	1.1125	1.04075	1.01394	1.07371		1.06793	1.02773	1.1295	1.05043	1.12777		1.06341	1.18907	1.11741	1.36651	1.09188		1.08583	1.10964	1.0889	1.05873	1.10603		1.10493	1.14556	1.05364	1.14588	1.26924
1.02468	1.13941	1.28544	1.22436	1.10134		1.08061	1.10328	1.03193	1.02494	1.0706		1.06186	1.02852	1.12708	1.0504	1.13037		1.06911	1.21314	1.10143	1.38502	1.13122		1.13473	1.10774	1.08908	1.07047	1.07229		1.12908	1.14045	1.09281	1.14785	1.22129
1.02699	1.14121	1.2778	1.24722	1.10003		1.13085	1.0916	1.04881	1.03001	1.05299		1.06368	1.02666	1.11464	1.03922	1.11772		1.06741	1.15879	1.0999	1.3363	1.10353		1.12482	1.10832	1.08424	1.07305	1.03301		1.12395	1.15042	1.12995	1.09234	1.27749
1.02664	1.13823	1.28274	1.24292	1.09722		1.08264	1.07657	1.04833	1.02642	1.06979		1.0607	1.0203	1.11581	1.05155	1.12583		1.06013	1.09381	1.09393	1.36229	1.07755		1.10736	1.10463	1.07759	1.07793	1.1017		1.11661	1.1521	1.14359	1.18175	1.23955
1.01295	1.1379	1.27998	1.22395	1.09988		1.11636	1.07618	1.04403	1.02693	1.04827		1.06262	1.02746	1.11444	1.04475	1.12002		1.05356	1.08584	1.06892	1.34513	1.09367		1.07547	1.11094	1.076	1.07797	1.0708		1.12788	1.16236	1.09912	1.1447	1.26883
1.02109	1.13995	1.2756	1.23251	1.09892		1.07517	1.09844	1.04862	1.02392	1.04703		1.05747	1.02734	1.10865	1.0459	1.11338		1.05239	1.14282	1.10746	1.28802	1.10245		1.09276	1.10569	1.07638	1.07769	1.07356		1.13541	1.1499	1.03813	1.15227	1.23782
1.01353	1.13919	1.28645	1.22074	1.10053		1.02812	1.08295	1.04862	1.01537	1.07296		1.05385	1.02747	1.08875	1.02484	1.11625		1.06236	1.05732	1.09716	1.29007	1.07546		1.11741	1.10485	1.07647	1.07392	1.11732		1.14046	1.15358	1.14742	1.16899	1.26962
1.02295	1.13815	1.28006	1.25188	1.09671		1.04142	1.09638	1.05044	1.02151	1.08424		1.05448	1.02879	1.09756	1.0484	1.13278		1.07455	1.09622	1.09793	1.33875	1.10256		1.10143	1.10596	1.08382	1.06927	1.07674		1.13373	1.16312	1.09616	1.14403	1.28811
1.01639	1.14026	1.2779	1.21246	1.09935		1.01901	1.08695	1.05421	1.02068	1.08804		1.05143	1.03439	1.09096	1.05298	1.12816		1.07422	1.03246	1.06553	1.28184	1.09574		1.0999	1.10619	1.08254	1.06335	1.09106		1.13228	1.14629	1.05112	1.18673	1.20553
1.02648	1.13908	1.28139	1.18868	1.10315		1.06482	1.07734	1.05131	1.02424	1.06513		1.05051	1.03656	1.09803	1.05038	1.10912		1.0801	1.17849	1.10813	1.33443	1.09604		1.09393	1.10244	1.08231	1.0567	1.05636		1.13295	1.16262	1.12564	1.09839	1.20728
1.01932	1.13769	1.27068	1.26257	1.0987		1.06191	1.07582	1.05412	1.02198	1.07721		1.04572	1.03893	1.10447	1.04532	1.12949		1.07847	1.09038	1.06606	1.2652	1.0727		1.06892	1.10301	1.08484	1.0593	1.13609		1.1297	1.16417	1.14318	1.13252	1.27815
1.01381	1.13888	1.2728	1.22505	1.098		1.08169	1.07586	1.05526	1.02606	1.10005		1.05147	1.03649	1.12646	1.05051	1.13626		1.06953	1.06312	1.06503	1.27459	1.07586		1.10746	1.10382	1.08771	1.05799	1.07708		1.13169	1.15904	1.10184	1.1358	1.24786
1.02042	1.13732	1.27618	1.2291	1.0981		1.06391	1.06804	1.0511	1.02595	1.11168		1.049	1.04103	1.13018	1.05529	1.13736		1.06076	1.13914	1.08234	1.26594	1.08874		1.09716	1.10282	1.09181	1.06355	1.05791		1.14796	1.16814	1.12298	1.17851	1.30356
1.02194	1.13979	1.26604	1.22705	1.10134		1.06121	1.10964	1.05667	1.01972	1.08489		1.04375	1.02841	1.13232	1.05382	1.13859		1.06695	1.04615	1.06914	1.29737	1.08405		1.09793	1.10355	1.09366	1.06363	1.12956		1.13244	1.17604	1.12073	1.06226	1.23769
1.01603	1.13845	1.27463	1.22812	1.1015		1.08552	1.10637	1.05997	1.02174	1.07628		1.04785	1.0353	1.12932	1.0503	1.13365		1.07733	1.17855	1.07253	1.26964	1.06585		1.06553	1.10024	1.09556	1.07024	1.10992		1.13634	1.16827	1.14189	1.07079	1.23935
1.0287	1.13843	1.2811	1.21214	1.09216		1.07298	1.09608	1.06	1.02038	1.08339		1.04322	1.03869	1.11499	1.05514	1.12328		1.06617	1.11442	1.11	1.24134	1.07106		1.10813	1.10085	1.09178	1.07374	1.10099		1.14304	1.15247	1.11589	1.12718	1.26541
1.02112	1.1385	1.28165	1.22493	1.09235		1.09122	1.09165	1.06451	1.02548	1.06674		1.03585	1.03589	1.1309	1.05478	1.13988		1.06313	1.12895	1.05146	1.24642	1.10314		1.06606	1.10161	1.08837	1.0751	1.06004		1.13139	1.15624	1.05747	1.16627	1.21014
1.02079	1.13789	1.28712	1.22956	1.0917		1.05912	1.09295	1.06503	1.01327	1.06993		1.03538	1.03207	1.1357	1.05297	1.12529		1.06665	1.14318	1.0906	1.23155	1.11663		1.06503	1.09727	1.08952	1.07265	1.11458		1.11889	1.16198	1.04701	1.13422	1.22562
1.01129	1.137	1.28645	1.23708	1.10521		1.09845	1.08919	1.05943	1.01347	1.08426		1.03662	1.03387	1.11972	1.0496	1.14326		1.06389	1.13916	1.10687	1.28989	1.08396		1.08234	1.09447	1.09289	1.07659	1.09487		1.12188	1.18189	1.10016	1.14598	1.16697
1.02505	1.13732	1.2826	1.17717	1.09999		1.08737	1.07903	1.06059	1.0222	1.09289		1.03488	1.03859	1.1156	1.05485	1.12746		1.05992	1.10302	1.05083	1.27336	1.15325		1.06914	1.10112	1.09133	1.07303	1.06372		1.12887	1.19044	1.07675	1.13032	1.19545
1.01386	1.13675	1.27528	1.21698	1.09996		1.05401	1.07252	1.05989	1.02438	1.0785		1.03208	1.04444	1.11932	1.02552	1.13241		1.07043	1.12718	1.06198	1.23567	1.09119		1.07253	1.09845	1.0912	1.07822	1.13245		1.12754	1.18242	1.10797	1.11986	1.14483
1.01711	1.13766	1.27731	1.22733	1.09295		1.07141	1.08306	1.05771	1.01333	1.07278		1.03616	1.04651	1.10989	1.05746	1.13143		1.07008	1.17653	1.11902	1.29661	1.08461		1.11	1.09703	1.08182	1.08029	1.06329		1.13074	1.19682	1.15972	1.09274	1.14987
1.02349	1.13636	1.26987	1.20985	1.09444		1.09297	1.08863	1.04647	1.024	1.07279		1.03098	1.04736	1.11091	1.06151	1.12525		1.06499	1.15172	1.06178	1.24441	1.11451		1.05146	1.09647	1.08167	1.07382	1.10224		1.12503	1.20835	1.1128	1.12687	1.26604
1.01702	1.13636	1.27061	1.23178	1.09611		1.11761	1.09483	1.05611	1.01541	1.06608		1.03643	1.03638	1.10917	1.03617	1.12512		1.0595	1.05459	1.10166	1.263	1.08616		1.0906	1.09474	1.08342	1.07731	1.10001		1.11395	1.20109	1.10354	1.16802	1.22738
1.01549	1.13634	1.25602	1.20618	1.09608		1.11228	1.08664	1.05511	1.00836	1.06092		1.04043	1.04187	1.10357	1.06386	1.1504		1.06065	1.12158	1.08633	1.28799	1.12195		1.10687	1.0936	1.08732	1.0645	1.03909		1.11351	1.20129	1.02011	1.13936	1.18006
1.0183	1.13761	1.27014	1.21366	1.10075		1.09387	1.10491	1.05403	1.00764	1.0519		1.03373	1.04129	1.10144	1.05301	1.13447		1.05971	1.11976	1.08711	1.26871	1.08801		1.05083	1.09759	1.08667	1.06347	1.07282		1.11794	1.19504	1.09592	1.11361	1.21611
1.00888	1.13828	1.27477	1.22209	1.08851		1.06955	1.0969	1.04839	1.02703	1.08498		1.03613	1.03541	1.09986	1.06451	1.12085		1.05406	1.1541	1.0887	1.25441	1.10224		1.06198	1.09533	1.0826	1.06159	1.10291		1.11579	1.19683	1.06832	1.13482	1.23651
1.02459	1.134	1.27871	1.20558	1.09455		1.1293	1.09312	1.05645	1.01274	1.09956		1.03704	1.04046	1.10656	1.04479	1.14786		1.05107	1.09336	1.05472	1.25855	1.11211		1.11902	1.08968	1.08674	1.05419	1.08797		1.12536	1.19013	1.09338	1.06132	1.26471
1.02626	1.13351	1.26724	1.20393	1.09759		1.12399	1.08011	1.05038	1.00442	1.11911		1.03892	1.03765	1.10575	1.0658	1.12599		1.06077	1.15372	1.07302	1.22864	1.09271		1.06178	1.09089	1.08456	1.05557	1.08693		1.13266	1.1802	1.15002	1.13711	1.24054
1.00388	1.1357	1.27923	1.20866	1.09426		1.13179	1.0776	1.05576	1	1.1287		1.03559	1.03451	1.08845	1.06692	1.12529		1.07457	1.12134	1.08546	1.22623	1.10896		1.10166	1.09071	1.08294	1.04977	1.08127		1.14088	1.17651	1.09152	1.13317	1.17964
1.01543	1.13529	1.28105	1.21558	1.09071		1.10038	1.07535	1.05112	1.01486	1.13146		1.03302	1.03997	1.08003	1.04183	1.14276		1.07121	1.17064	1.06087	1.26322	1.09777		1.08633	1.0896	1.08204	1.06072	1.0693		1.12217	1.17675	1.16762	1.1174	1.29041
1.0134	1.13466	1.28582	1.2492	1.10206		1.11591	1.07719	1.05644	1.01818	1.11742		1.03692	1.04358	1.09419	1.06879	1.14594		1.06853	1.18571	1.09588	1.24714	1.0704		1.08711	1.09042	1.08474	1.06136	1.07845		1.12783	1.16861	1.06543	1.13281	1.2074
1.02095	1.13678	1.29329	1.21567	1.09074		1.11096	1.06552	1.04929	1.01858	1.08268		1.03571	1.04314	1.08897	1.06131	1.11929		1.05709	1.07719	1.08769	1.29239	1.0746		1.0887	1.08728	1.0851	1.05036	1.13288		1.13541	1.17866	1.08296	1.1035	1.17356
1.02416	1.13809	1.2878	1.24089	1.09221		1.1003	1.06637	1.05062	1.02296	1.09028		1.03347	1.04353	1.089	1.03907	1.13537		1.06024	1.13986	1.06504	1.30502	1.08816		1.05472	1.09033	1.08466	1.05628	1.09437		1.12881	1.19555	1.08031	1.10567	1.22239
1.01406	1.13797	1.28964	1.22218	1.09078		1.09153	1.06587	1.04778	1.01622	1.09128		1.03305	1.04473	1.08909	1.06077	1.14112		1.06514	1.18707	1.12472	1.28232	1.10586		1.07302	1.08847	1.07752	1.06092	1.08718		1.14299	1.18846	1.10318	1.07698	1.20865
1.02209	1.13731	1.29665	1.20127	1.09085		1.11048	1.06368	1.04167	1.01523	1.08456		1.03025	1.04182	1.10243	1.06643	1.11682		1.0578	1.13778	1.08199	1.32061	1.07242		1.08546	1.08721	1.07611	1.04613	1.05322		1.13771	1.18767	1.08045	1.07976	1.17879
1.023	1.1382	1.30038	1.21356	1.0994		1.1233	1.05903	1.04773	1.02457	1.09024		1.03225	1.0465	1.10434	1.04733	1.15927		1.05967	1.14846	1.07365	1.28479	1.09972		1.06087	1.08798	1.0775	1.05345	1.06584		1.12834	1.20944	1.04545	1.03788	1.1351
1.01845	1.13641	1.29808	1.18971	1.09323		1.13203	1.06344	1.04926	1.03234	1.10967		1.02562	1.04385	1.10746	1.06728	1.15986		1.0574	1.07641	1.05578	1.29468	1.05778		1.09588	1.08752	1.08301	1.04764	1.03835		1.13853	1.19883	1.07884	1.08437	1.24779
1.02389	1.13721	1.29585	1.22426	1.09274		1.14557	1.06512	1.05123	1.02523	1.10462		1.03002	1.04229	1.10381	1.04296	1.14812		1.05438	1.20858	1.08289	1.23623	1.0777		1.08769	1.09203	1.08269	1.04582	1.09695		1.15562	1.19129	1.13787	1.13478	1.25016
1.01474	1.13787	1.29716	1.21468	1.09208		1.19755	1.06461	1.04822	1.01562	1.08412		1.0274	1.04043	1.113	1.04508	1.14223		1.03839	1.11888	1.07011	1.24889	1.12832		1.06504	1.08481	1.08362	1.05362	1.12006		1.15542	1.19877	1.14209	1.10827	1.19656
1.01747	1.13455	1.29181	1.23713	1.09241		1.20894	1.06486	1.03512	1.02394	1.06403		1.02619	1.04379	1.10397	1.02903	1.13342		1.04362	1.10654	1.08342	1.28808	1.07726		1.12472	1.08527	1.07848	1.04171	1.1304		1.15245	1.20643	1.08803	1.18238	1.27498
1.02693	1.13543	1.28898	1.22995	1.086		1.19291	1.06574	1.05453	1.01821	1.08189		1.02334	1.03641	1.09836	1.049	1.17454		1.03967	1.12182	1.11014	1.24121	1.08686		1.08199	1.08712	1.07688	1.04668	1.07311		1.14177	1.19538	1.11303	1.06555	1.22167
1.01516	1.13466	1.2902	1.23918	1.08678		1.20347	1.07108	1.04947	1.02286	1.10883		1.02796	1.03848	1.12099	1.04725	1.1459		1.04026	1.10563	1.05696	1.26521	1.07757		1.07365	1.08284	1.07014	1.05745	1.05176		1.15721	1.1818	1.08728	1.13179	1.24336
1.02823	1.13502	1.27998	1.24111	1.08635		1.19466	1.06794	1.05316	1.03248	1.09217		1.0251	1.04475	1.12146	1.0618	1.15727		1.04127	1.20771	1.07235	1.27958	1.08923		1.05578	1.08252	1.06975	1.04919	1.07684		1.15544	1.18669	1	1.14203	1.19335
1.01963	1.13613	1.28842	1.21274	1.09881		1.17516	1.06663	1.05183	1.02075	1.09875		1.02356	1.04486	1.11954	1.06557	1.16172		1.0488	1.10655	1.08125	1.29298	1.08444		1.08289	1.08355	1.06931	1.04774	1.08626		1.16514	1.17847	1.01386	1.07053	1.28307
1.02615	1.13593	1.29783	1.2195	1.08651		1.17494	1.0516	1.05095	1.02899	1.06788		1.02691	1.04537	1.12678	1.07162	1.14948		1.04784	1.16361	1.05899	1.31828	1.08716		1.07011	1.0801	1.0747	1.03901	1.05546		1.15611	1.19302	1.05257	1.08057	1.1793
1.03002	1.13503	1.29126	1.21056	1.08452		1.2075	1.06573	1.05204	1.01337	1.08546		1.02272	1.04496	1.12249	1.06116	1.14633		1.0669	1.13872	1.071	1.28599	1.08708		1.08342	1.07629	1.07877	1.03961	1.07959		1.15017	1.20124	1.03292	1.12965	1.16681
1.02138	1.13664	1.29162	1.2598	1.08542		1.31428	1.05619	1.04085	1.00992	1.1116		1.02309	1.04468	1.11419	1.07331	1.14891		1.05858	1.1639	1.06587	1.29908	1.10451		1.11014	1.0827	1.0742	1.01971	1.11042		1.16128	1.18999	1.01151	1.13228	1.22223
1.01795	1.13445	1.28849	1.23995	1.08886		1.5929	1.05878	1.04918	1.01744	1.09669		1.02888	1.04373	1.10738	1.08335	1.13203		1.055	1.08662	1.09441	1.2708	1.13026		1.05696	1.07833	1.06822	1.0192	1.13224		1.15734	1.18517	1.10205	1.13845	1.20971
1.0174	1.13218	1.27681	1.25048	1.09779		1.83967	1.05019	1.04682	1.0118	1.09853		1.02788	1.03252	1.10246	1.08602	1.12265		1.06132	1.08005	1.03951	1.28675	1.11793		1.07235	1.08118	1.07116	1.01718	1.1114		1.13585	1.18659	1.03713	1.14401	1.1679
1.02117	1.1355	1.27475	1.23164	1.07914		1.86391	1.04183	1.0477	1.01802	1.08518		1.02718	1.04885	1.11174	1.07078	1.14129		1.05055	1.0893	1.08399	1.29809	1.13586		1.08125	1.08067	1.07025	1.01711	1.03622		1.14586	1.19282	1.07521	1.09737	1.16009
1.02087	1.13557	1.2863	1.23258	1.08904		1.91372	1.02482	1.04724	1.01482	1.08106		1.02943	1.05091	1.09984	1.03328	1.14324		1.05137	1.08643	1.05487	1.28443	1.1314		1.05899	1.08142	1.0688	1.02905	1.08928		1.15124	1.18487	1.09925	1.09537	1.22937
1.02566	1.13186	1.2863	1.24239	1.09805		1.9	1.02355	1.03337	1.01707	1.1276		1.02383	1.04871	1.09556	1.0783	1.13076		1.04984	1.19729	1.08429	1.31265	1.11459		1.071	1.0765	1.06824	1.03273	1.05651		1.14087	1.18732	1.04871	1.06842	1.28792
1.02567	1.13274	1.27936	1.22047	1.09625		1.86816	1.04313	1.03631	1.02435	1.10569		1.02537	1.05343	1.10259	1.05526	1.14548		1.04372	1.16107	1.04364	1.30304	1.10267		1.06587	1.07672	1.06611	1.03022	1.10495		1.16041	1.18616	1.06346	1.10748	1.24444
1.03081	1.13421	1.28891	1.24051	1.08675		1.83233	1.04781	1.04655	1.02046	1.10948		1.02567	1.05901	1.099	1.06562	1.15521		1.05164	1.0978	1.08711	1.30669	1.16838		1.09441	1.07892	1.06558	1.03175	1.05247		1.14734	1.17421	1.12207	1.03548	1.19038
1.01998	1.13398	1.28611	1.2019	1.09459		1.75231	1.03137	1.0311	1.02697	1.11075		1.02756	1.05351	1.10909	1.07919	1.15832		1.05555	1.15	1.09746	1.29195	1.11848		1.03951	1.07772	1.07051	1.03362	1.06676		1.13763	1.17577	1.06058	1.05792	1.22398
1.02542	1.13153	1.29264	1.22347	1.09089		1.71562	1.04186	1.03594	1.01715	1.13601		1.03158	1.05517	1.10392	1.06643	1.15023		1.05089	1.07239	1.09745	1.3265	1.08708		1.08399	1.07893	1.07216	1.03033	1.08902		1.12871	1.16778	1.03542	1.0452	1.15603
1.02478	1.13386	1.29811	1.23383	1.09493		1.69128	1.03187	1.04101	1.02606	1.09743		1.0339	1.06162	1.10661	1.07905	1.13446		1.05968	1.09336	1.04667	1.32032	1.11341		1.05487	1.07814	1.07124	1.02793	1.10188		1.12674	1.16863	1.03119	1.12642	1.28147
1.02452	1.13414	1.28839	1.1689	1.08747		1.65707	1.02298	1.03551	1.01415	1.15186		1.02675	1.05854	1.11133	1.06342	1.15454		1.0494	1.16653	1.02648	1.34177	1.11433		1.08429	1.07643	1.07706	1.02854	1.06303		1.14426	1.16176	1.05852	1.07283	1.21633
1.01816	1.13179	1.29754	1.2484	1.09115		1.58387	1.01831	1.03862	1.02303	1.2912		1.03442	1.05219	1.11143	1.08876	1.14823		1.05528	1.04493	1.0554	1.36227	1.11796		1.04364	1.07757	1.07471	1.02937	1.05796		1.13959	1.16779	1.06175	1.03077	1.19331
1.02103	1.12803	1.31031	1.21887	1.08892		1.57248	1.00722	1.04508	1.03059	1.35387		1.03187	1.05288	1.10718	1.07991	1.12522		1.05521	1.18545	1.07833	1.29455	1.1346		1.08711	1.07745	1.07803	1.0264	1.06872		1.1365	1.16361	1.09231	1.07057	1.21325
1.02109	1.13183	1.30964	1.26265	1.09346		1.57542	1.03269	1.03299	1.01699	1.33103		1.0368	1.05477	1.11481	1.07717	1.13102		1.05785	1.07793	1.08449	1.31085	1.1554		1.09746	1.07149	1.07839	1.02272	1.03394		1.13685	1.15986	1.04074	1.06312	1.21982
1.01004	1.13164	1.30488	1.23052	1.09091		1.51838	1.02408	1.02695	1.02142	1.252		1.03024	1.05594	1.11028	1.0712	1.1373		1.05658	1.00409	1.04395	1.33511	1.12564		1.09745	1.07581	1.07871	1.02491	1.06611		1.15315	1.16133	1.06133	1.08814	1.28744
1.01535	1.13206	1.30357	1.22105	1.08246		1.49334	1.0098	1.03166	1.02334	1.18922		1.02938	1.05478	1.12203	1.07428	1.14869		1.05132	1.01777	1.07101	1.32993	1.132		1.04667	1.07397	1.07542	1.02584	1.07117		1.14602	1.16901	1.00473	1.09897	1.26689
1.01527	1.13265	1.29875	1.22107	1.0872		1.53269	1.00493	1.02638	1.03111	1.17064		1.03267	1.05206	1.13531	1.08638	1.13865		1.04964	1	1.10439	1.33729	1.17029		1.02648	1.07018	1.0726	1.01996	1.04424		1.14214	1.17302	1.03156	1.09995	1.24495
1.02238	1.13477	1.32818	1.22825	1.08737		1.54149	1	1.03066	1.00386	1.19329		1.02846	1.06584	1.1314	1.07952	1.14123		1.04499	1.01255	1.04719	1.36955	1.17141		1.0554	1.07523	1.07286	1.01792	1.07983		1.14438	1.17582	1.07183	1.13706	1.13849
1.02573	1.13236	1.32884	1.23749	1.08773		1.50268	1.01617	1.0304	1.01424	1.2268		1.03319	1.06582	1.13108	1.08847	1.15387		1.04175	1.18707	1.09574	1.32593	1.1469		1.07833	1.07257	1.07682	1.01596	1.08773		1.153	1.17655	1.08668	1.09206	1.2001
1.02029	1.1314	1.32817	1.20214	1.08201		1.49094	1.00446	1.02173	1.01765	1.20751		1.03308	1.06444	1.11598	1.08945	1.16414		1.03779	1.06815	1.06722	1.35678	1.1472		1.08449	1.07244	1.08057	1.00866	1.03018		1.13153	1.17563	1.05319	1.09726	1.15461
1.02092	1.12986	1.32361	1.1966	1.09481		1.51358	1.01101	1.0278	1.02131	1.21906		1.03693	1.06024	1.1252	1.07817	1.16108		1.03946	1.13846	1.08284	1.36141	1.16169		1.04395	1.07078	1.07473	1.01928	1.05766		1.11433	1.17598	1.05157	1.10581	1.29514
1.01728	1.12948	1.32378	1.22287	1.08691		1.49771	1.02097	1.0261	1.02739	1.29132		1.03602	1.06509	1.12619	1.08629	1.15393		1.04782	1.04462	1.07855	1.33513	1.17807		1.07101	1.07093	1.07403	1.01937	1.08555		1.1422	1.19302	1.13406	1.13331	1.17457
1.02874	1.13212	1.32627	1.20148	1.09039		1.4743	1.01873	1.02431	1.01708	1.28142		1.03263	1.07001	1.11818	1.07475	1.14138		1.05468	1.07368	1.05265	1.37376	1.13784		1.10439	1.07184	1.07428	1.02264	1.01563		1.1442	1.18639	1.11446	1.11722	1.23348
1.02186	1.13516	1.31355	1.20679	1.0857		1.47084	1.03166	1.01904	1.01375	1.28017		1.03806	1.06988	1.14054	1.07143	1.15604		1.04951	1.06419	1.08145	1.34845	1.16991		1.04719	1.07158	1.07268	1.01925	1.08246		1.13117	1.18648	1.06768	1.13002	1.19858
1.03515	1.13493	1.31432	1.19329	1.09372		1.44051	1.03636	1.01776	1.02338	1.21073		1.04042	1.06576	1.13727	1.08596	1.16291		1.04924	1.10954	1.05889	1.36366	1.17509		1.09574	1.07144	1.08148	1.02111	1.07012		1.1312	1.16943	1.09564	1.01658	1.22327
1.02286	1.13259	1.32277	1.18514	1.09641		1.40208	1.02449	1.01995	1.02334	1.18056		1.03954	1.07037	1.15684	1.09542	1.13735		1.04458	1.06344	1.05944	1.35317	1.15121		1.06722	1.06986	1.08611	1.024	1.08146		1.15805	1.17852	1.01889	1.06104	1.28563
1.01138	1.13036	1.33454	1.22361	1.09442		1.41794	1.02333	1.00629	1.02155	1.15367		1.04287	1.07221	1.16098	1.063	1.14818		1.04453	1.12963	1.07155	1.38136	1.17445		1.08284	1.07213	1.08966	1.01904	1.08977		1.13455	1.18374	1.11973	1.09273	1.11508
1.01444	1.13269	1.32352	1.25478	1.09224		1.37109	1.01479	1.01957	1.02293	1.13418		1.0385	1.07513	1.18188	1.09787	1.14124		1.03975	1.07064	1.0406	1.36606	1.16613		1.07855	1.07243	1.09289	1.02166	1.09974		1.1303	1.19592	1.07322	1.08021	1.13954
1.02122	1.12989	1.32826	1.20045	1.0987		1.40132	1.01322	1.01976	1.01574	1.14989		1.03814	1.06729	1.19387	1.06125	1.15378		1.0399	1.08484	1.07884	1.3984	1.17894		1.05265	1.06997	1.09808	1.01724	1.08564		1.13865	1.1987	1.07728	1.05079	1.20974
1.01918	1.12891	1.32917	1.19338	1.09905		1.32577	1.02523	1.012	1.0129	1.15626		1.04156	1.07436	1.18825	1.08042	1.15033		1.05626	1.05192	1.08915	1.35372	1.16053		1.08145	1.07086	1.09901	1.02423	1.09747		1.14339	1.19753	1.05773	1.12277	1.19196
1.01704	1.13058	1.33472	1.1877	1.10191		1.3538	1.02222	1.01842	1.02088	1.13297		1.0453	1.07641	1.18815	1.0844	1.16542		1.0577	1.08355	1.06626	1.39891	1.17616		1.05889	1.07298	1.09976	1.0204	1.04503		1.14573	1.19293	1.08261	1.08845	1.13588
1.02647	1.12863	1.32667	1.1894	1.09859		1.35052	1.01646	1.01893	1.01409	1.16583		1.04474	1.07515	1.19787	1.09787	1.16389		1.0598	1.15007	1.08067	1.4324	1.17798		1.05944	1.06973	1.10651	1.01664	1.04312		1.14807	1.18564	1.04094	1.08571	1.28256
1.01841	1.13141	1.32181	1.24143	1.09579		1.30688	1.02222	1.01386	1.01222	1.14234		1.04695	1.07388	1.20751	1.08418	1.14822		1.06897	1.16605	1.06945	1.42534	1.17282		1.07155	1.06998	1.10075	1.00754	1.05464		1.1553	1.1852	1.0269	1.13616	1.21289
1.02178	1.13002	1.32211	1.16773	1.10162		1.33826	1.03458	1.01943	1.01065	1.15288		1.04963	1.05777	1.1964	1.09983	1.15431		1.06718	1.1169	1.05952	1.40155	1.15658		1.0406	1.06879	1.10552	1.00489	1.05279		1.12757	1.18533	1.06386	1.07887	1.27534
1.02011	1.12819	1.31565	1.18335	1.09346		1.29631	1.02808	1.02064	1.02162	1.1615		1.04317	1.063	1.19508	1.09801	1.12823		1.05852	1.17736	1.07868	1.39743	1.19303		1.07884	1.06647	1.09934	1.00327	1.0863		1.14581	1.20077	1.07601	1.11116	1.191
1.01879	1.13113	1.31436	1.1868	1.09816		1.25996	1.02412	1.02418	1.0202	1.16095		1.04733	1.06688	1.19971	1.08552	1.12965		1.05167	1.15161	1.03019	1.4022	1.20001		1.08915	1.06881	1.09886	1	1.03266		1.1371	1.19429	1.11374	1.06643	1.2035
1.02028	1.13095	1.31204	1.17679	1.09904		1.23184	1.02184	1.01875	1.01341	1.15014		1.04962	1.07505	1.19962	1.085	1.14572		1.05892	1.16822	1.10588	1.33459	1.20737		1.06626	1.06628	1.09558	1.00666	1.01481		1.13673	1.1978	1.0838	1.10847	1.17267
1.0239	1.1289	1.30365	1.21454	1.09934		1.19837	1.01761	1.02825	1.01191	1.17337		1.04925	1.06502	1.20814	1.07873	1.14295		1.056	1.15249	1.05217	1.37592	1.2371		1.08067	1.06817	1.09456	1.00906	1.00828		1.12728	1.19981	1.06122	1.04365	1.22109
1.02272	1.12717	1.31029	1.19094	1.09661		1.20899	1.00895	1.02106	1.01579	1.14762		1.05284	1.07158	1.19691	1.09201	1.15488		1.04727	1.18427	1.05001	1.48145	1.21059		1.06945	1.06803	1.09647	1.0111	1.04822		1.14284	1.20081	1.09596	1.12638	1.20753
1.02069	1.12714	1.31497	1.22048	1.10672		1.23369	1.00419	1.02354	1.00893	1.15377		1.05502	1.0804	1.215	1.09733	1.16359		1.05167	1.21803	1.04817	1.48143	1.23552		1.05952	1.06452	1.09502	1.01934	1.07944		1.1561	1.20746	1.13244	1.08146	1.20581
1.02052	1.12703	1.31776	1.20761	1.09515		1.20894	1.01482	1.01411	1.01477	1.14942		1.04623	1.07305	1.2236	1.09268	1.14935		1.04239	1.17954	1.07973	1.41642	1.1913		1.07868	1.06327	1.08849	1.02873	1.03124		1.15176	1.19161	1.08996	1.07173	1.28311
1.02219	1.12921	1.31495	1.18923	1.09201		1.2141	1.01714	1.02816	1.01351	1.15476		1.05875	1.08449	1.20608	1.08836	1.1633		1.03006	1.2868	1.03933	1.39464	1.21899		1.03019	1.06092	1.08977	1.02493	1.04773		1.14054	1.1978	1.08332	1.11037	1.18751
1.01501	1.12958	1.31829	1.20822	1.10013		1.18515	1.00946	1.02374	1.0224	1.15415		1.05533	1.0837	1.22218	1.09482	1.14958		1.03764	1.26896	1.06736	1.4144	1.17585		1.10588	1.06445	1.08113	1.02348	1.07294		1.16385	1.20135	1.06317	1.05382	1.27353
1.02231	1.13064	1.30754	1.20398	1.09925		1.21826	1.02125	1.02638	1.00835	1.14261		1.05418	1.08579	1.21674	1.0662	1.15126		1.04472	1.23591	1.07586	1.38193	1.21257		1.05217	1.06266	1.06927	1.02097	1.06713		1.14511	1.21642	1.11357	1.06302	1.16564
1.01883	1.12762	1.30069	1.19177	1.09449		1.20154	1.01594	1.02755	1.0132	1.15221		1.05856	1.08511	1.24388	1.1036	1.18974		1.0407	1.25414	1.05726	1.40429	1.22409		1.05001	1.0604	1.06248	1.02474	1.04731		1.13771	1.21748	1.02618	1.07773	1.1011
1.02699	1.12921	1.3031	1.23002	1.10382		1.15633	1.01475	1.02873	1.01143	1.14067		1.05881	1.09192	1.2523	1.10797	1.17736		1.03918	1.22765	1.05947	1.44353	1.20741		1.04817	1.06549	1.0611	1.03188	1.08371		1.11283	1.2224	1.07288	1.05363	1.16629
1.03149	1.12789	1.30052	1.2105	1.09889		1.14192	1.01204	1.02167	1.01277	1.14904		1.06434	1.09638	1.24329	1.11137	1.16584		1.04013	1.19305	1.06017	1.42269	1.21993		1.07973	1.06241	1.05946	1.02616	1		1.14132	1.21369	1.0385	1.06127	1.20847
1.02565	1.12826	1.30456	1.20516	1.10446		1.11413	1.00903	1.0199	1.01134	1.12324		1.06411	1.09692	1.23478	1.09343	1.16985		1.036	1.25903	1.04725	1.44035	1.27441		1.03933	1.06214	1.05175	1.02502	1.09617		1.17742	1.21202	1.09768	1.08637	1.24163
1.02686	1.12805	1.30052	1.22084	1.10836		1.12835	1.02209	1.02486	1.01223	1.15725		1.0682	1.09552	1.24035	1.0861	1.15634		1.03982	1.20381	1.08355	1.44476	1.29479		1.06736	1.06359	1.05335	1.02193	1.06318		1.17492	1.21357	1.08916	1.13117	1.30187
1.02064	1.12834	1.30873	1.21948	1.10125		1.13852	1.02723	1.02041	1.01858	1.12704		1.06759	1.09588	1.24971	1.09403	1.15615		1.03569	1.24745	1.0439	1.41231	1.24742		1.07586	1.06191	1.05007	1.02247	1.10383		1.20222	1.21375	1.08537	1.10807	1.25557
1.02289	1.12838	1.30193	1.21468	1.10697		1.14339	1.01575	1.02887	1.01988	1.12693		1.06514	1.09246	1.23604	1.09715	1.14734		1.02621	1.27649	1.04231	1.46531	1.21246		1.05726	1.06049	1.0491	1.02253	1.06767		1.16211	1.21575	1.03872	1.0906	1.25757
1.02017	1.12895	1.3088	1.22748	1.10156		1.10637	1.00061	1.02095	1.01805	1.13659		1.07122	1.09779	1.23106	1.10156	1.16387		1.02089	1.25686	1.07371	1.47923	1.20831		1.05947	1.06505	1.04194	1.02381	1.05345		1.17109	1.22044	1.12096	1.08698	1.28804
1.0273	1.12832	1.30795	1.22797	1.09658		1.11118	1.01257	1.01865	1.01277	1.12091		1.07227	1.09074	1.23742	1.10008	1.15517		1.02358	1.29561	1.08981	1.43563	1.26027		1.06017	1.06373	1.03957	1.01638	1.00934		1.17881	1.22458	1.12919	1.12106	1.26812
1.01953	1.1276	1.31625	1.21979	1.10196		1.12495	1.01555	1.01834	1.01355	1.13606		1.07415	1.09309	1.23909	1.10346	1.16261		1.01696	1.28736	1.03268	1.5026	1.2237		1.04725	1.06256	1.03564	1.01259	1.06898		1.16734	1.22721	1.03274	1.09669	1.23947
1.01641	1.12759	1.30903	1.21501	1.09925		1.12705	1.01171	1.02154	1.01171	1.13411		1.08258	1.07325	1.23863	1.07603	1.15169		1.02665	1.27754	1.0336	1.44262	1.20053		1.08355	1.06065	1.03303	1.0144	1.05622		1.15026	1.2334	1.06234	1.10914	1.22311
1.02103	1.12808	1.29631	1.20093	1.09435		1.14034	1.01631	1.01728	1.01464	1.12866		1.08117	1.08245	1.23397	1.09606	1.13841		1.03535	1.2989	1.05776	1.47328	1.22619		1.0439	1.06066	1.02364	1.0124	1.05845		1.16092	1.22589	1.11593	1.04421	1.2517
1.01388	1.12838	1.30193	1.18034	1.0969		1.11693	1.01545	1.02247	1.01539	1.10446		1.08907	1.09286	1.23182	1.08714	1.15388		1.0456	1.24845	1.05326	1.43929	1.25631		1.04231	1.05974	1.02228	1.01123	1.07836		1.1707	1.21351	1.10766	1.13047	1.27733
1.02762	1.12829	1.29926	1.22224	1.0977		1.12121	1.03103	1.01659	1.01153	1.11611		1.09198	1.09157	1.24781	1.10077	1.15696		1.04529	1.27926	1.02812	1.51605	1.26825		1.07371	1.06288	1.01622	1.01453	1.02726		1.15108	1.20645	1.07507	1.12108	1.27461
1.01678	1.12961	1.2966	1.18684	1.09781		1.10139	1.01834	1.0131	1.01989	1.10585		1.08881	1.07943	1.24434	1.08179	1.16721		1.03762	1.35181	1.04512	1.48486	1.24773		1.08981	1.06198	1.0082	1.01843	1.07752		1.1866	1.20635	1.13035	1.14331	1.21152
1.02359	1.12784	1.29505	1.22195	1.09684		1.1206	1.02756	1.01186	1.02065	1.22052		1.09721	1.08904	1.24232	1.08622	1.17309		1.03429	1.30566	1.06256	1.4597	1.22298		1.03268	1.05728	1.0006	1.01559	1.08265		1.1781	1.20459	1.0676	1.09914	1.28889
1.02346	1.12683	1.29053	1.20404	1.0996		1.0806	1.04983	1.01819	1.01078	1.23123		1.09725	1.09554	1.24252	1.07268	1.18779		1.03238	1.25376	1.0412	1.48683	1.23956		1.0336	1.06107	1	1.02085	1.01928		1.16075	1.20132	1.10018	1.11996	1.13359
1.02647	1.12539	1.29523	1.23903	1.09318		1.07921	1.04055	1.01151	1.02837	1.20639		1.09569	1.09905	1.25097	1.1048	1.16442		1.03205	1.25585	1.06083	1.45389	1.24389		1.05776	1.06084	1.0007	1.01868	1.08973		1.16889	1.20921	1.05237	1.0808	1.15281
1.02353	1.12485	1.29418	1.19687	1.09354		1.08268	1.0486	1.01483	1.011	1.18566		1.09702	1.10537	1.25664	1.08139	1.18148		1.03383	1.27616	1.07205	1.49074	1.23177		1.05326	1.05694	1.00345	1.01734	1.04856		1.16159	1.21426	1.10276	1.12735	1.24348
1.02144	1.12672	1.30184	1.1856	1.0967		1.0976	1.05177	1.01812	1.00639	1.24507		1.0994	1.10194	1.24727	1.06163	1.16483		1.01614	1.27012	1.03514	1.50088	1.21905		1.02812	1.05788	1.00417	1.02069	1.08163		1.14356	1.21677	1.08304	1.06535	1.18786
1.02002	1.12574	1.3017	1.20292	1.09724		1.08164	1.04092	1.01534	1.01128	1.26927		1.09587	1.09757	1.24148	1.09295	1.15602		1.03089	1.34317	1.04252	1.4381	1.20113		1.04512	1.05979	1.00287	1.02221	1.06422		1.14529	1.21061	1.13757	1.08248	1.1457
1.03071	1.12729	1.29895	1.18212	1.09031		1.07278	1.04336	1.01986	1.02085	1.25481		1.09501	1.10022	1.24782	1.12279	1.16879		1.04316	1.33522	1.07452	1.48826	1.2386		1.06256	1.05623	1.00526	1.02529	1.03942		1.13117	1.20627	1.08705	1.01322	1.19588
1.01206	1.12657	1.29155	1.19701	1.08921		1.07436	1.03591	1	1.02275	1.20775		1.10042	1.08667	1.25385	1.09119	1.15172		1.03704	1.37069	1.05786	1.49155	1.25117		1.0412	1.05521	1.00698	1.02598	1.06828		1.15007	1.1986	1.08864	1.04106	1.18475
1.01349	1.12559	1.29566	1.21033	1.10139		1.10585	1.05487	1.01154	1.03017	1.22741		1.10285	1.10562	1.26354	1.1021	1.16987		1.02605	1.28704	1.02582	1.49334	1.25371		1.06083	1.05628	1.00989	1.02161	1.08597		1.14284	1.21158	1.07452	1.0444	1.20721
1.02198	1.12475	1.29424	1.21377	1.09638		1.09483	1.06173	1.01264	1.01051	1.18941		1.10571	1.10017	1.27252	1.0951	1.1789		1.03924	1.29058	1.05681	1.44845	1.26898		1.07205	1.05506	1.01166	1.01979	1.06495		1.13654	1.2056	1.12032	1.12374	1.23531
1.01692	1.12627	1.28635	1.20422	1.09415		1.11267	1.03319	1.00952	1.01424	1.15132		1.11441	1.104	1.26754	1.10519	1.14098		1.03692	1.35349	1.01731	1.54691	1.23659		1.03514	1.05307	1.01117	1.02312	1.07758		1.13277	1.22118	1.10716	1.10437	1.22854
1.02258	1.12429	1.28667	1.21109	1.09045		1.06392	1.04689	1.01583	1.01187	1.14159		1.10926	1.1081	1.27416	1.09994	1.16464		1.04081	1.35012	1.01196	1.52358	1.27701		1.04252	1.05538	1.00905	1.02206	1.03173		1.10862	1.2097	1.08717	1.09667	1.26606
1.02381	1.12477	1.2876	1.20057	1.09069		1.05025	1.04905	1.01747	1.01309	1.11932		1.10939	1.10227	1.27726	1.10712	1.1616		1.03222	1.4243	1.03131	1.52337	1.29142		1.07452	1.05557	1.01035	1.01584	1.06546		1.07903	1.2101	1.12942	1.0762	1.22637
1.02944	1.12555	1.27908	1.22985	1.09295		1.08224	1.03541	1.02258	1.02069	1.13704		1.11196	1.09562	1.26292	1.10654	1.15257		1.02259	1.40887	1.04962	1.504	1.32985		1.05786	1.05177	1.01505	1.00701	1.07667		1.07789	1.21674	1.10489	1.11546	1.28353
1.02303	1.12581	1.28701	1.20382	1.0856		1.0508	1.04031	1.023	1.01885	1.1429		1.10692	1.09401	1.2677	1.10465	1.16925		1.01619	1.2971	1.02496	1.56983	1.3169		1.02582	1.05687	1.0243	1.00675	1.09389		1.09045	1.21024	1.15596	1.0966	1.22016
1.017	1.12505	1.28747	1.18671	1.08584		1.07973	1.04579	1.01798	1.02152	1.11558		1.11187	1.09629	1.26758	1.10813	1.17626		1.02361	1.39368	1.04386	1.52566	1.27805		1.05681	1.05263	1.02806	1.00776	1.06806		1.11164	1.20864	1.07668	1.04619	1.20998
1.01967	1.1237	1.28696	1.22386	1.08488		1.0626	1.0318	1.01956	1.01589	1.14024		1.10858	1.10151	1.25898	1.10839	1.16628		1.02029	1.4563	1.04947	1.51536	1.28602		1.01731	1.05401	1.03374	1.00626	1.05245		1.05737	1.20833	1.13221	1.07825	1.25774
1.02137	1.1239	1.29026	1.2142	1.1003		1.0508	1.04571	1.02177	1.00898	1.12967		1.10937	1.104	1.26684	1.12277	1.17434		1.02219	1.35928	1.03537	1.52432	1.28726		1.01196	1.05328	1.0331	1.0121	1.09049		1.07249	1.20051	1.07231	1.10853	1.22998
1.02294	1.12498	1.28824	1.21152	1.08885		1.06333	1.04289	1.02226	1.01927	1.14843		1.1045	1.10001	1.26864	1.12436	1.14874		1.0247	1.34706	1.03043	1.53526	1.2628		1.03131	1.05014	1.02553	1.01517	1.06746		1.07593	1.19983	1.05433	1.06982	1.18333
1.01618	1.1256	1.28294	1.18764	1.0859		1.06222	1.04885	1.02193	1.03104	1.15796		1.10832	1.10825	1.25142	1.10174	1.16852		1.03017	1.336	1.03615	1.56322	1.28674		1.04962	1.04892	1.02678	1.01443	1.08919		1.03311	1.19604	1.07145	1.09977	1.23333
1.02103	1.1235	1.28523	1.20206	1.08591		1.09164	1.03145	1.02465	1.0089	1.21478		1.11186	1.11268	1.26498	1.11813	1.16449		1.03092	1.32243	1.03059	1.52245	1.2486		1.02496	1.05255	1.03101	1.02588	1.09837		1.08356	1.2016	1.11763	1.06894	1.0375
1.01966	1.12317	1.29346	1.22781	1.09465		1.0313	1.02346	1.02125	1.01873	1.20454		1.10696	1.12583	1.2558	1.1231	1.19027		1.02762	1.32764	1	1.57346	1.27944		1.04386	1.04985	1.03605	1.02864	1.07615		1.08716	1.20131	1.10101	1.07011	1.27262
1.01221	1.12385	1.29561	1.17383	1.09111		1.02452	1.05645	1.02419	1.01354	1.20145		1.10699	1.12613	1.25616	1.14075	1.16796		1.02202	1.29228	1.03979	1.59932	1.27139		1.04947	1.04379	1.03699	1.02241	1.04603		1.04432	1.19175	1.10422	1.03348	1.25111
1.01977	1.12292	1.28961	1.17497	1.08725		1.04053	1.05693	1.02886	1.01564	1.1885		1.10823	1.12176	1.25149	1.12994	1.17452		1.0249	1.33957	1.02513	1.50411	1.25724		1.03537	1.04954	1.03657	1.02272	1.02751		1.0291	1.19134	1.08349	1.03437	1.29981
1.013	1.12459	1.28712	1.17935	1.08819		1.06023	1.05176	1.03581	1.01853	1.20973		1.10776	1.12308	1.25016	1.12661	1.16915		1.03944	1.28078	1.05771	1.58424	1.26937		1.03043	1.04676	1.03786	1.02303	1.05194		1.0677	1.19048	1.07923	1.08414	1.24367
1.02011	1.12358	1.28726	1.19148	1.08272		1.07858	1.06324	1.02496	1.02033	1.22224		1.10997	1.12863	1.25896	1.11508	1.17788		1.02848	1.2719	1.05199	1.54711	1.26814		1.03615	1.04455	1.03682	1.02997	1.06759		1.08366	1.20571	1.04822	1.01275	1.16109
1.01591	1.12266	1.28175	1.19569	1.08972		1.10202	1.05492	1.03528	1.02079	1.20953		1.10583	1.12963	1.25854	1.11454	1.16349		1.02483	1.37341	1.06112	1.56821	1.27034		1.03059	1.04949	1.03341	1.01577	1.08057		1.06358	1.213	1.01745	1	1.27482
1.02269	1.12335	1.27894	1.18697	1.08706		1.10283	1.047	1.03246	1.02278	1.17447		1.11132	1.12657	1.25968	1.13492	1.17253		1.0337	1.29762	1.05476	1.61861	1.30221		1	1.04732	1.03419	1.01541	1.09602		1.05207	1.22019	1.17562	1.01786	1.27705
1.02274	1.12263	1.28156	1.2217	1.10231		1.14302	1.04551	1.02881	1.02147	1.16014		1.1114	1.11563	1.25356	1.12283	1.17873		1.03292	1.32027	1.01896	1.61441	1.3078		1.03979	1.04504	1.03358	1.01519	1.03339		1.03872	1.21408	1.10983	1.05467	1.22317
1.02586	1.12211	1.28871	1.22359	1.1136		1.12138	1.0487	1.03924	1.02918	1.14477		1.11507	1.12642	1.24895	1.12088	1.1718		1.03012	1.35573	1.03536	1.60385	1.28724		1.02513	1.04814	1.03611	1.00896	1.09091		1.02826	1.21192	1.08838	1.09049	1.1492
1.01678	1.12241	1.29043	1.18372	1.11947		1.13149	1.05662	1.03902	1.017	1.17026		1.11439	1.128	1.25742	1.10575	1.18346		1.03395	1.27018	1.06451	1.66488	1.3119		1.05771	1.04713	1.03496	1.01075	1.07105		1.00308	1.21993	1.11787	1.09704	1.20333
1.01708	1.12173	1.30218	1.13999	1.12123		1.12607	1.04569	1.03171	1.01436	1.12041		1.11189	1.13021	1.25412	1.15042	1.16822		1.03105	1.30265	1.06349	1.53224	1.30526		1.05199	1.0445	1.04211	1.02142	1.01657		1.04389	1.22628	1.13637	1.04016	1.19789
1.01982	1.1222	1.29438	1.18045	1.12471		1.11759	1.05651	1.03617	1.02587	1.14018		1.1123	1.11768	1.25439	1.12398	1.1571		1.02289	1.29652	1.0527	1.60344	1.3231		1.06112	1.04664	1.04108	1.02582	1.04504		1.03591	1.22935	1.16151	1.06978	1.20921
1.02022	1.12206	1.29935	1.22281	1.11982		1.12024	1.05406	1.03678	1.00494	1.11912		1.11313	1.1185	1.24649	1.15274	1.16435		1.01774	1.27148	1.00778	1.6705	1.33055		1.05476	1.04699	1.04363	1.02894	1.07644		1.04147	1.21952	1.10866	1.05328	1.17792
1.02121	1.12306	1.29173	1.21232	1.12131		1.09087	1.06785	1.03887	1.01363	1.12556		1.11535	1.12757	1.26513	1.11944	1.17846		1.01702	1.33393	1.04966	1.61417	1.29175		1.01896	1.04421	1.04347	1.03467	1.01518		1.03402	1.21789	1.06868	1.03906	1.22736
1.02036	1.12284	1.30834	1.20806	1.12092		1.08842	1.06742	1.03704	1.03272	1.12217		1.11868	1.12469	1.25951	1.1362	1.17191		1.01892	1.22624	1.04301	1.59898	1.29902		1.03536	1.04382	1.05016	1.03089	1.00429		1.05945	1.21124	1.09899	1.04254	1.28127
1.02846	1.11996	1.31495	1.16558	1.12521		1.06158	1.05781	1.03672	1.02542	1.12924		1.11707	1.12585	1.26123	1.14898	1.16791		1.01149	1.31732	1.03846	1.61067	1.30517		1.06451	1.04555	1.05147	1.02955	1.04391		1.0356	1.20637	1.14413	1.06969	1.26368
1.0211	1.12117	1.31839	1.19064	1.11632		1.07972	1.05865	1.03478	1.01571	1.12067		1.1137	1.12806	1.2577	1.13513	1.1661		1.022	1.22809	1.01233	1.53886	1.32829		1.06349	1.04534	1.05508	1.03168	1.05564		1.03855	1.20248	1.08039	1.06495	1.24003
1.02403	1.12268	1.30764	1.19447	1.1145		1.08367	1.04407	1.03406	1.02314	1.13393		1.11922	1.13122	1.26123	1.14238	1.17385		1.02429	1.33963	1.05545	1.60531	1.30198		1.0527	1.04715	1.0658	1.03461	1.04928		1.02541	1.21766	1.13589	1.0384	1.21342
1.02325	1.12296	1.30636	1.19735	1.11644		1.06278	1.05084	1.04423	1.02278	1.14577		1.1128	1.1297	1.27773	1.11326	1.17336		1.01725	1.2672	1.01765	1.62667	1.31273		1.00778	1.04821	1.07503	1.03561	1.07635		1.0313	1.20881	1.10198	1.11627	1.28822
1.02099	1.12352	1.31167	1.14797	1.12135		1.08422	1.04712	1.04024	1.02141	1.12767		1.11875	1.13293	1.26456	1.12583	1.15616		1.00375	1.28215	1.03972	1.55702	1.33606		1.04966	1.04962	1.0855	1.03553	1.04558		1.02422	1.20187	1.11255	1.08386	1.23409
1.02758	1.12125	1.30898	1.21619	1.11184		1.05021	1.04713	1.04232	1.02755	1.1738		1.12359	1.13539	1.25798	1.11502	1.17964		1	1.21683	1.01136	1.64516	1.36623		1.04301	1.04322	1.09143	1.03455	1.09001		1.00018	1.20629	1.08753	1.06914	1.19245
1.01254	1.12069	1.29599	1.20434	1.11758		1.0329	1.04999	1.03662	1.00971	1.16749		1.12311	1.12719	1.26358	1.11894	1.19547		1.00406	1.28748	1.06409	1.70142	1.35562		1.03846	1.04904	1.08729	1.03277	1.05987		1.04311	1.20986	1.12138	1.06171	1.25555
1.02123	1.12196	1.28912	1.20855	1.11051		1.05733	1.05475	1.02544	1.01062	1.16683		1.12071	1.12977	1.25975	1.14065	1.1815		1.01219	1.28146	1.02156	1.6914	1.34286		1.01233	1.04816	1.08585	1.02964	1.07778		1.00284	1.20376	1.07255	1.06621	1.25735
1.0292	1.12264	1.2955	1.19799	1.11424		1.02424	1.04471	1.03292	1.02201	1.20086		1.12546	1.13017	1.25963	1.12264	1.1707		1.01301	1.34876	1.04617	1.66484	1.32514		1.05545	1.0422	1.09325	1.03092	1.08609		1.02055	1.19465	1.19155	1.1072	1.24409
1.02685	1.12311	1.286	1.18715	1.11743		1.02692	1.04525	1.04299	1.01993	1.17499		1.13312	1.13207	1.25106	1.11791	1.17788		1.01156	1.23056	1.05309	1.60016	1.38429		1.01765	1.04853	1.09667	1.02931	1.02091		1.02414	1.19883	1.11225	1.06728	1.28062
1.02183	1.12298	1.28524	1.19343	1.11033		1.06359	1.04677	1.03984	1.02405	1.17075		1.12833	1.1281	1.26967	1.12226	1.17354		1.00673	1.20443	1.02479	1.64067	1.35882		1.03972	1.04565	1.09302	1.03399	1.08569		1.00212	1.19764	1.04099	1.04507	1.22833
1.01585	1.12186	1.29474	1.19457	1.11135		1.02883	1.04714	1.03642	1.0254	1.14837		1.12878	1.13195	1.26371	1.13792	1.13633		1.00811	1.21655	1.03757	1.66669	1.34116		1.01136	1.04604	1.08747	1.04006	1.07138		1.02868	1.19146	1.15624	1.08047	1.17616
1.02149	1.12253	1.28155	1.17495	1.10813		1.04041	1.05052	1.02691	1.02318	1.13255		1.13243	1.13976	1.27519	1.13181	1.15313		1.00406	1.1828	1.06333	1.71132	1.41556		1.06409	1.04249	1.09343	1.03318	1.03324		1.01715	1.19401	1.08609	1.05279	1.19213
1.02191	1.12171	1.28354	1.18468	1.12054		1.02635	1.04444	1.04041	1.02443	1.13115		1.12899	1.14188	1.28885	1.14103	1.16126		1.00921	1.28784	1.04403	1.68451	1.41388		1.02156	1.04125	1.0918	1.04867	1.07999		1	1.19071	1.15556	1.10184	1.22778
1.01886	1.12012	1.2855	1.20361	1.12053		1.04052	1.06162	1.03239	1.02454	1.1578		1.12688	1.14699	1.27454	1.14429	1.15552		1.01028	1.24421	1.02028	1.6263	1.39157		1.04617	1.04126	1.09389	1.051	1.06074		1.01009	1.19168	1.14031	1.10296	1.16167
1.01891	1.11905	1.27364	1.16341	1.11538		1.02305	1.0412	1.03744	1.01667	1.16636		1.13248	1.14815	1.27457	1.12443	1.18184		1.02663	1.20823	1.0279	1.66759	1.35853		1.05309	1.04143	1.1024	1.04747	1.12757		1.00784	1.20145	1.09324	1.0841	1.22917
1.0215	1.12042	1.26508	1.19928	1.11962		1.03325	1.05531	1.03513	1.01121	1.15121		1.13741	1.15583	1.27529	1.1376	1.17431		1.03064	1.27943	1.03394	1.73192	1.3591		1.02479	1.04229	1.11118	1.05762	1.10951		1.00287	1.1878	1.12992	1.12905	1.16884
1.02287	1.12104	1.26055	1.18041	1.11905		1.03995	1.06592	1.03608	1.02074	1.17708		1.13844	1.14654	1.27625	1.14562	1.17763		1.02907	1.13791	1.04344	1.72221	1.38722		1.03757	1.04077	1.10905	1.0527	1.115		1.05195	1.18561	1.12018	1.14661	1.20119
1.03185	1.12006	1.25968	1.15966	1.10627		1.06753	1.07331	1.04438	1.02116	1.18017		1.13845	1.14185	1.28839	1.1391	1.18311		1.04167	1.17433	1.05153	1.71235	1.36846		1.06333	1.03301	1.11357	1.05753	1.03002		1.01887	1.19768	1.13007	1.07051	1.19819
1.02773	1.11968	1.2591	1.20052	1.10468		1.0759	1.08541	1.04767	1.01347	1.19801		1.1354	1.14102	1.27904	1.15969	1.1832		1.04957	1.19249	1.04202	1.67019	1.39486		1.04403	1.03521	1.11855	1.05999	1.08257		1.03469	1.19268	1.11427	1.03706	1.19181
1.02372	1.12097	1.26099	1.16943	1.10299		1.0522	1.08296	1.05023	1.01364	1.19706		1.13817	1.1515	1.27937	1.16634	1.17558		1.04086	1.18831	1.04713	1.67078	1.42685		1.02028	1.03965	1.12845	1.06444	1.07329		1.02174	1.19345	1.08663	1.14492	1.15658
1.01433	1.12086	1.25351	1.18176	1.10696		1.05869	1.07932	1.04574	1.01598	1.19918		1.13824	1.14996	1.28367	1.16265	1.17346		1.03898	1.1949	1.08857	1.6532	1.40037		1.0279	1.0311	1.12705	1.0709	1.05835		1.05988	1.18947	1.13769	1.12295	1.20122
1.01784	1.12044	1.25497	1.16283	1.09892		1.04109	1.06766	1.04408	1.01596	1.18506		1.13421	1.1605	1.27715	1.19144	1.16617		1.02941	1.20475	1.07245	1.7251	1.39293		1.03394	1.03062	1.13215	1.06828	1.09841		1.02855	1.18338	1.08275	1.14786	1.20925
1.01957	1.12203	1.25516	1.16793	1.12127		1.04539	1.07677	1.05357	1.02488	1.18108		1.14439	1.15439	1.28082	1.19215	1.16169		1.03191	1.13564	1.04795	1.62194	1.38249		1.04344	1.01825	1.13523	1.07077	1.07338		1.05084	1.19454	1.15244	1.12035	1.2569
1.02457	1.12165	1.2522	1.20227	1.11595		1.04045	1.0736	1.05411	1.02489	1.21794		1.14317	1.15211	1.27944	1.15933	1.17793		1.03258	1.1611	1.06524	1.63953	1.3799		1.05153	1.01703	1.13973	1.07806	1.07539		1.04017	1.19212	1.1544	1.15815	1.16421
1.02042	1.11882	1.25164	1.18671	1.12359		1.06952	1.06568	1.05897	1.01381	1.1747		1.13694	1.1568	1.28128	1.16599	1.15826		1.03805	1.20159	1.07783	1.68765	1.38594		1.04202	1.01346	1.14781	1.08401	1.0906		1.06307	1.19175	1.1442	1.05853	1.11918
1.02235	1.12136	1.25432	1.17695	1.12693		1.06253	1.07134	1.05951	1.01339	1.19266		1.13862	1.1508	1.26885	1.14755	1.1662		1.04017	1.18791	1.05747	1.74737	1.39624		1.04713	1.00458	1.15707	1.09507	1.11147		1.04388	1.19654	1.13857	1.13538	1.13053
1.01867	1.1207	1.25472	1.15703	1.12911		1.06326	1.07138	1.05299	1.01639	1.20458		1.14311	1.15257	1.26806	1.1653	1.18779		1.04228	1.09164	1.07562	1.65797	1.40306		1.08857	1.00166	1.15577	1.0857	1.1092		1.04148	1.18824	1.08346	1.10007	1.17657
1.02803	1.11965	1.25583	1.17275	1.12028		1.07911	1.06775	1.05577	1.02338	1.20809		1.15051	1.15856	1.27223	1.16311	1.16338		1.05236	1.1347	1.07408	1.72202	1.41585		1.07245	1.00176	1.15629	1.09028	1.08187		1.07933	1.18251	1.11683	1.16331	1.0913
1.02549	1.12026	1.24933	1.16629	1.11738		1.06973	1.06238	1.05491	1.02188	1.15989		1.14938	1.16653	1.28135	1.14729	1.18322		1.04873	1.1358	1.08282	1.78034	1.42588		1.04795	1	1.15437	1.09412	1.11297		1.06908	1.1769	1.14773	1.1936	1.12152
1.01686	1.12113	1.25028	1.11689	1.12304		1.06153	1.06032	1.05623	1.02279	1.16688		1.15074	1.16826	1.27603	1.16762	1.17043		1.05041	1.2459	1.09139	1.70941	1.43719		1.06524	1.00002	1.15283	1.08769	1.12362		1.07199	1.18137	1.14445	1.1107	1.09971
1.03148	1.1198	1.25843	1.1892	1.12054		1.09033	1.06941	1.06418	1.01453	1.15751		1.15173	1.16426	1.27858	1.16941	1.17394		1.05748	1.15909	1.07218	1.7286	1.43617		1.07783	1.00113	1.15654	1.09274	1.12855		1.09103	1.17197	1.10673	1.15841	1.20743
1.02466	1.11848	1.25713	1.18889	1.11478		1.1155	1.0655	1.0581	1.02798	1.16861		1.15974	1.16433	1.29114	1.16581	1.18081		1.05967	1.13274	1.09617	1.69536	1.42697		1.05747	1.00076	1.16563	1.09527	1.14567		1.09267	1.17943	1.15985	1.16214	1.09279
1.02252	1.12132	1.26646	1.15411	1.11536		1.09396	1.07203	1.05766	1.0169	1.16561		1.15433	1.16195	1.28343	1.17717	1.17636		1.06487	1.12393	1.12112	1.75989	1.51843		1.07562	1.00471	1.17499	1.10187	1.13225		1.09638	1.17285	1.14909	1.14487	1.17678
1.02271	1.12154	1.25401	1.18506	1.1105		1.13822	1.0833	1.0592	1.0105	1.17303		1.15458	1.16584	1.27507	1.16351	1.17063		1.07084	1.14493	1.11653	1.7531	1.45716		1.07408	1.01376	1.17465	1.10167	1.09674		1.05117	1.17117	1.13146	1.06518	1.18013
1.02381	1.11781	1.26075	1.17326	1.11511		1.08455	1.07571	1.05158	1.01056	1.18597		1.15472	1.17328	1.28879	1.18804	1.1765		1.08076	1.09009	1.11487	1.71273	1.47704		1.08282	1.0255	1.18391	1.09818	1.10624		1.11137	1.17001	1.16292	1.11164	1.18334
1.02246	1.12018	1.26286	1.2152	1.10189		1.11289	1.09033	1.05959	1.0253	1.18165		1.1576	1.16657	1.29355	1.18888	1.17658		1.07709	1.14211	1.11659	1.69701	1.50307		1.09139	1.02846	1.18554	1.10427	1.1403		1.0658	1.17292	1.14769	1.13801	1.19087
1.01774	1.11965	1.25352	1.1891	1.10513		1.15018	1.08045	1.06025	1.01419	1.16986		1.15207	1.16716	1.27813	1.1905	1.17106		1.08045	1.13592	1.09174	1.70058	1.44236		1.07218	1.04117	1.18151	1.1135	1.09357		1.11756	1.16917	1.15333	1.07707	1.17648
1.02318	1.11754	1.24968	1.14406	1.10441		1.14373	1.09592	1.05389	1.02627	1.17824		1.15968	1.16387	1.27954	1.18883	1.18417		1.08492	1.1962	1.12368	1.67281	1.47681		1.09617	1.04529	1.18104	1.11319	1.13631		1.10625	1.17175	1.10652	1.13016	1.16436
1.0235	1.11687	1.2534	1.14481	1.10792		1.1387	1.0913	1.05252	1.0282	1.19419		1.15709	1.16512	1.26723	1.172	1.18076		1.08873	1.1398	1.14048	1.72619	1.47185		1.12112	1.05801	1.18139	1.11492	1.10384		1.10185	1.16727	1.15634	1.09029	1.06172
1.02558	1.11976	1.24734	1.18881	1.10293		1.16446	1.07608	1.05479	1.02599	1.16899		1.15138	1.16597	1.2588	1.1817	1.18173		1.09156	1.15267	1.11945	1.74551	1.43943		1.11653	1.06867	1.18025	1.11756	1.12663		1.12511	1.18026	1.14688	1.14781	1.09238
1.02401	1.12025	1.24021	1.14306	1.10283		1.19064	1.06887	1.05888	1.02516	1.15664		1.159	1.16609	1.24991	1.1895	1.15483		1.09968	1.19315	1.10929	1.71687	1.45142		1.11487	1.0765	1.18225	1.11886	1.12056		1.10696	1.1802	1.15538	1.17544	1.19684
1.02196	1.1162	1.24311	1.17947	1.10122		1.17211	1.08977	1.05488	1.02005	1.17222		1.16262	1.15893	1.26002	1.19436	1.17962		1.10868	1.1285	1.12131	1.74409	1.47409		1.11659	1.08201	1.18375	1.11966	1.14688		1.15934	1.16651	1.20101	1.20042	1.03166
1.02104	1.11713	1.24192	1.13474	1.09766		1.1803	1.07691	1.05154	1.01706	1.189		1.16205	1.17426	1.2902	1.20755	1.16693		1.11275	1.23801	1.13798	1.76142	1.49082		1.09174	1.0871	1.18216	1.1315	1.1241		1.09732	1.18313	1.14666	1.15714	1.17667
1.01973	1.11631	1.22884	1.18587	1.10224		1.16633	1.06741	1.05439	1.02609	1.1657		1.16382	1.17672	1.27536	1.19761	1.18366		1.10111	1.16197	1.15778	1.8122	1.45575		1.12368	1.098	1.19359	1.13812	1.17843		1.14021	1.18293	1.17168	1.12626	1.13656
1.02583	1.11625	1.23448	1.09422	1.10008		1.20639	1.08622	1.05537	1.02683	1.18653		1.16491	1.18665	1.25301	1.17116	1.18125		1.10751	1.21143	1.13388	1.67434	1.4798		1.14048	1.10454	1.19578	1.14027	1.13414		1.11284	1.19387	1.20261	1.15199	1.11159
1.02278	1.11829	1.22771	1.15611	1.09511		1.23246	1.0733	1.05553	1.02722	1.18336		1.17145	1.18584	1.25545	1.1645	1.1958		1.12032	1.16772	1.19191	1.83939	1.48118		1.11945	1.11189	1.20624	1.14613	1.11951		1.14559	1.20859	1.22215	1.16895	1.18214
1.01561	1.11862	1.2294	1.15831	1.0996		1.2612	1.06994	1.05567	1.02439	1.21096		1.17309	1.18159	1.25131	1.19626	1.1872		1.13423	1.21677	1.16753	1.78237	1.50901		1.10929	1.11557	1.22194	1.14459	1.13495		1.14007	1.202	1.24114	1.13045	1.03064
1.02127	1.11671	1.23542	1.15943	1.10635		1.25648	1.0704	1.05403	1.02451	1.2098		1.16848	1.18744	1.26046	1.1964	1.17624		1.1279	1.25137	1.18435	1.87724	1.51507		1.12131	1.12325	1.22395	1.16007	1.10601		1.15259	1.20913	1.16018	1.17851	1.18806
1.02333	1.11518	1.23338	1.20392	1.11065		1.27804	1.07246	1.05675	1.02346	1.23561		1.17203	1.18705	1.25099	1.17346	1.18664		1.13217	1.19344	1.15421	1.74687	1.48853		1.13798	1.12487	1.22042	1.15762	1.13982		1.17266	1.21732	1.15528	1.18136	1.18659
1.02252	1.1163	1.22466	1.16678	1.0963		1.2835	1.07224	1.05739	1.02793	1.26056		1.16719	1.18679	1.24211	1.18123	1.18019		1.14017	1.21311	1.21883	1.81152	1.51404		1.15778	1.13223	1.2164	1.16746	1.16924		1.19909	1.22609	1.22356	1.19772	1.14245
1.02872	1.11684	1.23799	1.19182	1.09862		1.27783	1.06112	1.05311	1.02634	1.25451		1.17247	1.18843	1.24153	1.1697	1.16777		1.14761	1.2424	1.17635	1.78045	1.54156		1.13388	1.13535	1.21753	1.17406	1.13658		1.17602	1.22697	1.19316	1.19752	1.23023
1.02513	1.11698	1.22094	1.18164	1.10299		1.30262	1.09352	1.05605	1.01678	1.24731		1.17446	1.1946	1.23898	1.2233	1.17383		1.14078	1.25755	1.22985	1.84946	1.50083		1.19191	1.10491	1.22937	1.17592	1.19913		1.21725	1.22469	1.23155	1.16547	1.13496
1.01893	1.11598	1.22866	1.142	1.09349		1.29252	1.08695	1.06207	1.01361	1.27269		1.17285	1.19533	1.22858	1.16173	1.17576		1.16156	1.18317	1.22625	1.78243	1.52175		1.16753	1.13836	1.23107	1.17848	1.17432		1.20482	1.23363	1.18736	1.18632	1.20113
1.01199	1.11522	1.23551	1.13366	1.09196		1.28349	1.09214	1.05772	1.01025	1.24075		1.17386	1.19642	1.2425	1.182	1.19143		1.16566	1.25038	1.20281	1.77901	1.53534		1.18435	1.15045	1.22383	1.18763	1.16847		1.16662	1.23348	1.16251	1.19582	1.24686
1.0155	1.11367	1.2364	1.20239	1.09454		1.27029	1.08629	1.05824	1.01766	1.26092		1.17453	1.19404	1.25787	1.16703	1.17528		1.17274	1.27611	1.2182	1.79058	1.57062		1.15421	1.16696	1.23243	1.19298	1.21005		1.21696	1.23866	1.231	1.21814	1.2169
1.02232	1.11612	1.23906	1.19248	1.0956		1.31031	1.08561	1.06065	1.02102	1.26046		1.17804	1.19293	1.27552	1.18083	1.19445		1.17435	1.26244	1.20304	1.74857	1.4874		1.21883	1.1754	1.23523	1.19612	1.13038		1.22005	1.24139	1.14588	1.22018	1.17537
1.01618	1.11626	1.2414	1.1583	1.09245		1.31378	1.10315	1.05628	1.02755	1.2798		1.17571	1.18891	1.27162	1.1759	1.17208		1.18438	1.3353	1.2202	1.91048	1.52152		1.17635	1.18269	1.22377	1.19201	1.15447		1.24027	1.25413	1.22764	1.20677	1.23352
1.02499	1.11786	1.2405	1.13314	1.09403		1.33697	1.08575	1.05299	1.02543	1.32338		1.18256	1.19662	1.27491	1.16655	1.1969		1.1871	1.31629	1.24084	1.81645	1.53728		1.22985	1.19957	1.24506	1.20485	1.24196		1.25223	1.24758	1.23643	1.25853	1.26589
1.0242	1.11664	1.23846	1.17627	1.09141		1.29711	1.08116	1.04711	1.01375	1.34894		1.18253	1.18526	1.28163	1.18945	1.19768		1.19985	1.41466	1.22442	1.73915	1.53625		1.22625	1.20783	1.24452	1.21142	1.20607		1.26196	1.26035	1.19902	1.20377	1.2179
1.01969	1.1167	1.25401	1.18049	1.08939		1.33714	1.09367	1.05919	1.01763	1.31484		1.18065	1.20137	1.29491	1.18592	1.19079		1.20091	1.37256	1.22127	1.87837	1.52673		1.20281	1.21188	1.2418	1.22389	1.20087		1.21334	1.27799	1.20344	1.17739	1.33426
1.02469	1.11564	1.23784	1.18037	1.09648		1.30939	1.09692	1.05986	1.01428	1.26215		1.1808	1.19717	1.30087	1.19846	1.18625		1.21745	1.34605	1.28765	1.88978	1.53343		1.2182	1.22897	1.24663	1.22463	1.28114		1.28503	1.27929	1.20813	1.24157	1.19481
1.02023	1.11515	1.24508	1.14986	1.09321		1.33441	1.07129	1.05654	1.02275	1.24995		1.19461	1.19922	1.29136	1.19642	1.19091		1.22902	1.31935	1.29896	1.84441	1.57523		1.20304	1.242	1.24923	1.22374	1.19329		1.27176	1.27527	1.22345	1.28132	1.31255
1.0105	1.11291	1.25409	1.15617	1.09102		1.30109	1.11268	1.05772	1.02665	1.24688		1.19181	1.19763	1.3093	1.18244	1.19466		1.2327	1.38621	1.31855	1.92756	1.54078		1.2202	1.25087	1.25272	1.23426	1.1963		1.26535	1.27134	1.32243	1.3042	1.29694
1.0315	1.11423	1.23865	1.15701	1.0856		1.34073	1.10027	1.06037	1.02738	1.23355		1.19462	1.20039	1.3099	1.2142	1.21495		1.22431	1.38149	1.27953	1.90145	1.49018		1.24084	1.26499	1.25049	1.24274	1.2018		1.28343	1.29446	1.27631	1.28449	1.29698
1.01073	1.11309	1.24815	1.16759	1.09189		1.37365	1.10283	1.05763	1.02886	1.24229		1.19599	1.18809	1.31725	1.183	1.21853		1.23962	1.33602	1.32689	1.88271	1.55016		1.22442	1.2769	1.26881	1.24416	1.23935		1.28174	1.28349	1.27226	1.24943	1.37252
1.02889	1.11304	1.2437	1.17976	1.09267		1.34436	1.09905	1.05852	1.0248	1.2342		1.19726	1.19918	1.31315	1.17852	1.19813		1.25165	1.40345	1.33743	1.87984	1.53988		1.22127	1.28827	1.28714	1.24363	1.257		1.29427	1.29802	1.24853	1.29965	1.24922
1.02763	1.11752	1.24679	1.16264	1.0896		1.41127	1.09251	1.0589	1.01632	1.22393		1.20091	1.20223	1.29374	1.20764	1.20142		1.25839	1.36524	1.31294	2.00514	1.57744		1.28765	1.30885	1.28874	1.25431	1.27736		1.30671	1.31205	1.3156	1.3137	1.30595
1.02959	1.11716	1.24764	1.16256	1.08935		1.40266	1.08773	1.05956	1.00898	1.18483		1.19662	1.20466	1.32487	1.20286	1.19621		1.26992	1.48684	1.34765	1.91273	1.54401		1.29896	1.32512	1.29154	1.24957	1.26031		1.30045	1.30879	1.36117	1.34184	1.38621
1.02023	1.11636	1.25379	1.15773	1.08883		1.38694	1.08739	1.06322	1.01611	1.23502		1.1998	1.2074	1.34606	1.21253	1.19915		1.28211	1.53394	1.36002	1.93396	1.56814		1.31855	1.33484	1.29963	1.2578	1.30659		1.3124	1.33123	1.30811	1.38363	1.33979
1.02329	1.11618	1.26502	1.19153	1.08662		1.44504	1.095	1.06605	1.01549	1.23081		1.20608	1.20435	1.34598	1.22494	1.18776		1.29765	1.66271	1.36906	1.92846	1.56396		1.27953	1.35159	1.29561	1.26619	1.2417		1.29883	1.34123	1.3443	1.3885	1.41199
1.024	1.11681	1.27334	1.1795	1.09028		1.44681	1.09343	1.05781	1.01769	1.2187		1.20657	1.20385	1.34415	1.21931	1.19834		1.30164	1.474	1.36077	1.85394	1.5553		1.32689	1.37217	1.29421	1.27661	1.22207		1.3628	1.34867	1.30298	1.39599	1.45819
1.02671	1.11595	1.27421	1.16633	1.09681		1.41209	1.08762	1.05951	1.02471	1.20265		1.20987	1.20551	1.32412	1.23102	1.18998		1.30329	1.64343	1.34723	1.85762	1.5791		1.33743	1.38651	1.29889	1.28642	1.25404		1.33203	1.34568	1.22233	1.36183	1.43213
1.03128	1.11482	1.28167	1.14283	1.08273		1.37521	1.09665	1.05591	1.02689	1.19596		1.21102	1.20813	1.30998	1.21128	1.20176		1.31779	1.61	1.3774	1.90207	1.56347		1.31294	1.40298	1.305	1.29209	1.33849		1.37957	1.34717	1.31614	1.34679	1.47608
1.01679	1.11582	1.2711	1.15313	1.08689		1.34515	1.10291	1.05783	1.02577	1.20408		1.21279	1.21411	1.30917	1.23062	1.1832		1.33101	1.58923	1.4101	1.83857	1.56069		1.34765	1.42871	1.30683	1.29644	1.33057		1.39251	1.36523	1.37846	1.41151	1.51159
1.02767	1.11486	1.27512	1.17111	1.08649		1.38125	1.11045	1.04816	1.02578	1.22816		1.21307	1.21531	1.31531	1.21471	1.18351		1.34571	1.52288	1.40625	1.91579	1.57738		1.36002	1.44162	1.31407	1.30562	1.27426		1.37132	1.38129	1.30066	1.40833	1.51457
1.02208	1.11601	1.27295	1.2052	1.09163		1.38403	1.10067	1.05892	1.02867	1.22616		1.21295	1.20909	1.31223	1.22622	1.17939		1.36261	1.67333	1.40563	1.82719	1.59337		1.36906	1.45593	1.32716	1.30971	1.30016		1.40972	1.38451	1.3164	1.4463	1.42748
1.01712	1.11233	1.27845	1.11729	1.08477		1.40237	1.10988	1.05503	1.02679	1.25066		1.2194	1.22039	1.31376	1.21891	1.19966		1.37083	1.76369	1.3722	2.0729	1.60048		1.36077	1.47655	1.34661	1.32152	1.29052		1.39165	1.41392	1.40171	1.51004	1.54025
1.02965	1.11582	1.26766	1.16075	1.08949		1.37965	1.11137	1.05725	1.02601	1.28742		1.22132	1.22026	1.3165	1.23665	1.19783		1.38342	1.77792	1.44864	1.93264	1.63212		1.34723	1.50151	1.34865	1.32255	1.37937		1.42815	1.41746	1.35074	1.4953	1.44602
1.02328	1.11525	1.26119	1.16962	1.08261		1.41572	1.11121	1.05714	1.02343	1.2894		1.22379	1.22022	1.31427	1.20968	1.20994		1.39738	1.74055	1.41111	1.97317	1.59694		1.3774	1.52247	1.35351	1.31759	1.40284		1.4349	1.43471	1.34595	1.51564	1.60649
1.01985	1.11284	1.25111	1.15765	1.08403		1.41455	1.09714	1.05081	1.02663	1.25842		1.22312	1.21753	1.30066	1.22528	1.23297		1.40729	1.7591	1.44568	1.93714	1.59807		1.4101	1.54329	1.36758	1.33405	1.40199		1.44564	1.43616	1.40929	1.52325	1.60121
1.03028	1.11467	1.25616	1.18291	1.09123		1.36299	1.10843	1.05823	1.02736	1.26226		1.22203	1.23008	1.31095	1.22202	1.1962		1.41966	1.78225	1.44656	1.97351	1.59672		1.40625	1.57001	1.37631	1.33745	1.38982		1.44012	1.44801	1.44027	1.52913	1.43838
1.02062	1.11368	1.25276	1.15375	1.09298		1.36483	1.09911	1.05588	1.02577	1.2481		1.22543	1.22505	1.30625	1.24106	1.20327		1.42154	1.84062	1.44167	1.94746	1.58808		1.40563	1.59416	1.37623	1.33804	1.41019		1.48301	1.46463	1.38957	1.60153	1.52702
1.03103	1.11104	1.24365	1.11954	1.08484		1.35964	1.08432	1.06105	1.02245	1.20116		1.22544	1.22306	1.31001	1.22502	1.21		1.43661	1.81337	1.48175	1.92582	1.58975		1.3722	1.61312	1.3861	1.34874	1.32798		1.47189	1.48195	1.49016	1.60871	1.58624
1.02196	1.11055	1.24456	1.16858	1.08866		1.35753	1.0915	1.06108	1.02852	1.24946		1.22943	1.22633	1.31929	1.23367	1.19811		1.454	1.83459	1.4683	1.9363	1.61984		1.44864	1.64035	1.38719	1.35194	1.39361		1.51092	1.49977	1.4578	1.68642	1.65792
1.02502	1.1113	1.24622	1.15442	1.09153		1.36265	1.12067	1.04958	1.0195	1.26309		1.22503	1.22838	1.31147	1.223	1.20492		1.46321	1.90033	1.4723	1.99965	1.59597		1.41111	1.66489	1.39174	1.35742	1.4075		1.51905	1.50558	1.43973	1.64546	1.6516
1.02109	1.11095	1.23882	1.15289	1.08575		1.37085	1.11971	1.05943	1.00742	1.24278		1.23495	1.23223	1.31628	1.22862	1.19533		1.47676	1.94193	1.4761	2.13931	1.61784		1.44568	1.69364	1.39495	1.36921	1.40617		1.52558	1.51766	1.5118	1.67076	1.63308
1.01715	1.11196	1.2456	1.16599	1.08852		1.35708	1.13397	1.05185	1.01894	1.26856		1.23435	1.23412	1.31859	1.23575	1.17745		1.49405	1.97055	1.52074	1.91713	1.61415		1.44656	1.71356	1.39366	1.37071	1.45823		1.52478	1.53664	1.45906	1.75368	1.6989
1.02008	1.11405	1.24996	1.16428	1.08588		1.32221	1.11737	1.05068	1.02656	1.22423		1.23417	1.23081	1.30624	1.22168	1.18518		1.51626	2.00146	1.47699	2.15728	1.63458		1.44167	1.74232	1.39783	1.38175	1.53059		1.55285	1.5441	1.49975	1.75825	1.75746
1.02227	1.11301	1.23813	1.16646	1.08744		1.38661	1.12735	1.05529	1.01955	1.2455		1.23466	1.23825	1.31515	1.25599	1.23396		1.53017	2.02318	1.54206	2.06014	1.64091		1.48175	1.78211	1.38611	1.39457	1.48739		1.55163	1.55865	1.48669	1.79237	1.70919
1.01652	1.11129	1.23223	1.16623	1.08898		1.4086	1.12001	1.04768	1.02727	1.25134		1.24099	1.24218	1.30757	1.2425	1.22445		1.5414	2.00089	1.52449	2.14261	1.66532		1.4683	1.80419	1.3947	1.40325	1.46445		1.59074	1.57049	1.63592	1.79385	1.77805
1.02092	1.11248	1.245	1.12022	1.08735		1.38559	1.10504	1.04963	1.02807	1.22412		1.23578	1.24516	1.30235	1.23668	1.20373		1.54741	1.99931	1.54919	1.99857	1.65006		1.4723	1.8328	1.40451	1.41031	1.50117		1.57905	1.59363	1.5327	1.83157	1.84616
1.02351	1.11187	1.23966	1.14377	1.09831		1.33188	1.09889	1.04504	1.0231	1.2718		1.23776	1.24894	1.29895	1.24277	1.20372		1.558	2.1046	1.52821	2.00208	1.61172		1.4761	1.86553	1.41182	1.40968	1.5299		1.5741	1.60361	1.52744	1.87627	1.85095
1.01822	1.1136	1.25826	1.16343	1.10024		1.38455	1.08469	1.04348	1.02057	1.26228		1.2435	1.25456	1.29948	1.24013	1.21185		1.56903	2.13048	1.56979	2.17583	1.65496		1.52074	1.89718	1.41866	1.41708	1.51431		1.63867	1.63889	1.58629	1.84557	1.92026
1.02194	1.11274	1.27974	1.15723	1.09381		1.40336	1.10132	1.04957	1.02359	1.27836		1.24817	1.2495	1.30181	1.2718	1.1946		1.58978	2.21673	1.60556	2.10185	1.65897		1.47699	1.92098	1.4201	1.41491	1.57918		1.64732	1.64962	1.61015	1.87834	1.87847
1.02428	1.11238	1.2921	1.13293	1.0947		1.40364	1.0947	1.04532	1.02063	1.26964		1.24696	1.25322	1.29209	1.23433	1.2142		1.5936	2.11916	1.59001	2.14113	1.6686		1.54206	1.96532	1.4177	1.4335	1.60214		1.65175	1.672	1.56855	1.95798	1.97839
1.02295	1.11133	1.2918	1.1514	1.09566		1.40161	1.11932	1.04874	1.02133	1.24691		1.25196	1.24422	1.29363	1.24876	1.22342		1.61	2.15943	1.62945	2.04613	1.65919		1.52449	2.00053	1.42641	1.44508	1.55648		1.69384	1.69466	1.62585	1.95374	1.97633
1.01869	1.10988	1.29028	1.1474	1.08473		1.42751	1.1201	1.04598	1.01975	1.33072		1.25137	1.24885	1.30263	1.26533	1.20866		1.65407	2.0748	1.62006	2.09145	1.71282		1.54919	2.03274	1.43027	1.44247	1.6921		1.69756	1.71645	1.694	1.89836	2.0861
1.01899	1.11047	1.28692	1.13384	1.09067		1.43779	1.12068	1.04376	1.01818	1.3983		1.25396	1.25262	1.30875	1.25081	1.23382		1.65885	2.22985	1.63066	1.99826	1.60662		1.52821	2.07156	1.44613	1.44668	1.60659		1.69806	1.74181	1.70673	1.9815	2.08877
1.02774	1.10994	1.28533	1.14769	1.08626		1.42145	1.12743	1.03924	1.02217	1.35878		1.25601	1.25661	1.3072	1.24846	1.21487		1.67158	2.2324	1.71829	2.22929	1.68902		1.56979	2.1269	1.44513	1.45721	1.72466		1.72953	1.77678	1.72945	1.93444	2.06874
1.0204	1.11139	1.28374	1.14888	1.08633		1.44539	1.11791	1.04331	1.03018	1.30286		1.25513	1.25849	1.31351	1.26364	1.24647		1.68657	2.24234	1.70429	2.13919	1.66389		1.60556	2.1579	1.44872	1.46064	1.65245		1.7772	1.79714	1.76929	1.93665	1.98031
1.02009	1.11267	1.27716	1.14861	1.09073		1.44673	1.12104	1.03439	1.02508	1.31509		1.25694	1.25255	1.30835	1.26289	1.23424		1.68341	2.31331	1.69425	2.09214	1.65678		1.59001	2.19546	1.4508	1.46801	1.69732		1.76505	1.82515	1.71677	2.0955	2.12973
1.02812	1.11281	1.26874	1.1516	1.08592		1.49576	1.11345	1.02962	1.03481	1.30728		1.26535	1.25472	1.30542	1.24164	1.19148		1.7034	2.3627	1.75728	2.09787	1.69491		1.62945	2.24679	1.46065	1.47967	1.79373		1.77991	1.83841	1.79322	2.03106	2.28022
1.02262	1.11211	1.25505	1.16958	1.09277		1.46491	1.11901	1.02906	1.01477	1.35608		1.26268	1.2577	1.30513	1.26932	1.21888		1.73451	2.29768	1.76437	2.10161	1.66373		1.62006	2.28643	1.47153	1.49144	1.71561		1.81066	1.88066	1.85635	2.07193	2.31756
1.01649	1.11213	1.25575	1.15925	1.09594		1.48727	1.14439	1.03548	1.01167	1.46122		1.26467	1.26058	1.30766	1.2535	1.22777		1.74651	2.28746	1.80224	2.11384	1.70418		1.63066	2.34025	1.48318	1.49384	1.8419		1.83496	1.92325	1.92771	2.06689	2.24462
1.01964	1.11226	1.24528	1.16422	1.09774		1.52561	1.13169	1.03228	1.01362	1.42601		1.26489	1.26123	1.3151	1.24723	1.24789		1.74786	2.28694	1.80452	2.22103	1.71622		1.71829	2.39574	1.48804	1.51064	1.71416		1.8737	1.94096	1.82035	2.16107	2.51714
1.02755	1.11154	1.25044	1.15273	1.10186		1.5225	1.12162	1.01717	1.03133	1.40636		1.26449	1.26129	1.29443	1.26541	1.21501		1.7661	2.32555	1.865	2.16475	1.6949		1.70429	2.4458	1.49626	1.51808	1.85768		1.88272	1.99535	1.82746	2.27327	2.51721
1.01792	1.11135	1.25165	1.17607	1.09176		1.51896	1.13301	1.0197	1.03152	1.39659		1.27636	1.26472	1.27744	1.27605	1.20713		1.78058	2.25249	1.83836	2.17902	1.66184		1.69425	2.48759	1.4938	1.51883	1.93671		1.91349	2.03379	1.92556	2.21299	2.61662
1.0249	1.11165	1.25909	1.13667	1.0938		1.46264	1.12193	1.02532	1.03414	1.37254		1.27843	1.26794	1.27922	1.27702	1.23047		1.79359	2.35489	1.82736	2.14344	1.70018		1.75728	2.5474	1.48674	1.52085	1.89111		1.92605	2.06807	2.06736	2.23263	2.72145
1.0231	1.11055	1.24856	1.12267	1.09136		1.48198	1.11196	1.02818	1.01835	1.32796		1.27841	1.2736	1.28998	1.26455	1.21826		1.80536	2.33691	1.88642	2.09769	1.70488		1.76437	2.6034	1.49082	1.53266	1.99351		1.98969	2.10842	2.03714	2.29921	2.83613
1.01526	1.11027	1.25497	1.18588	1.09086		1.4905	1.11661	1.02217	1.01374	1.30532		1.2822	1.27169	1.29094	1.28981	1.21448		1.82404	2.39378	1.92891	2.28799	1.76291		1.80224	2.65599	1.499	1.54094	2.02944		2.02315	2.13425	2.01193	2.39665	2.77127
1.02561	1.11109	1.25384	1.13308	1.09377		1.52867	1.12272	1.02285	1.01599	1.31968		1.28914	1.26757	1.30074	1.28346	1.20551		1.86697	2.42521	1.95667	2.17856	1.76251		1.80452	2.72077	1.50849	1.55603	1.93553		2.06416	2.18401	2.16284	2.43278	3.10321
1.02886	1.10999	1.253	1.1738	1.08768		1.54946	1.1089	1.01991	1.01696	1.27601		1.28837	1.26655	1.28882	1.28734	1.23386		1.88514	2.44348	1.96108	2.20071	1.71349		1.865	2.97234	1.51759	1.56071	1.95174		2.09541	2.24733	2.13626	2.45469	3.02025
1.02463	1.10946	1.25451	1.17614	1.08617		1.53207	1.11823	1.01216	1.01951	1.29928		1.29184	1.26862	1.31215	1.26677	1.21721		1.89546	2.47308	1.96213	2.16668	1.73026		1.83836	3.02731	1.52098	1.56829	2.14847		2.12334	2.26143	2.14794	2.475	3.18653
1.02372	1.10996	1.24697	1.14901	1.08667		1.51462	1.1287	1.01812	1.01913	1.28666		1.29012	1.27099	1.34247	1.29955	1.20731		1.90817	2.48593	1.97415	2.30055	1.68358		1.82736	3.09825	1.53078	1.57568	2.15664		2.1653	2.30899	2.28587	2.56588	3.18161
1.02458	1.10876	1.24101	1.16943	1.08918		1.50959	1.14742	1.02083	1.02856	1.28309		1.29218	1.27057	1.32087	1.30832	1.2072		1.91988	2.54404	2.02947	2.25972	1.72235		1.88642	3.17396	1.53271	1.58578	2.20727		2.18114	2.36783	2.20902	2.61407	3.30547
1.01814	1.10907	1.23463	1.16743	1.08207		1.5355	1.12232	1.01642	1.02968	1.30024		1.29541	1.27782	1.31892	1.30061	1.19673		1.94676	2.53665	2.04998	2.29724	1.7191		1.92891	3.23455	1.53757	1.6132	2.11957		2.22049	2.4124	2.54361	2.6534	3.36441
1.02863	1.11079	1.24317	1.17321	1.08123		1.49647	1.14376	1.01466	1.03568	1.30889		1.29287	1.27584	1.32726	1.30362	1.22488		1.94438	2.46741	2.07238	2.26575	1.74275		1.95667	3.30151	1.55206	1.61505	2.2547		2.28407	2.47399	2.48691	2.70328	3.24501
1.02591	1.11143	1.24858	1.14978	1.0903		1.5215	1.14609	1.02347	1.03223	1.28398		1.29619	1.27158	1.31874	1.2909	1.23042		1.97295	2.46292	2.14996	2.28178	1.72679		1.96108	3.39486	1.55625	1.6227	2.31668		2.34181	2.54106	2.58945	2.71175	3.531
1.02552	1.11047	1.23411	1.16564	1.07481		1.55013	1.14213	1.01577	1.02451	1.28724		1.30371	1.28818	1.30577	1.28954	1.23094		2.00295	2.30875	2.19931	2.31847	1.74332		1.96213	3.46335	1.5644	1.63298	2.34547		2.38572	2.58983	2.63352	2.80698	3.45125
1.01769	1.11017	1.24587	1.14552	1.08264		1.51698	1.13245	1.02671	1.04023	1.33928		1.3091	1.28301	1.31219	1.29148	1.23866		2.04121	2.45995	2.22472	2.35758	1.7394		1.97415	3.52966	1.57128	1.64981	2.36903		2.43249	2.65078	2.57382	2.92683	3.64842
1.02046	1.11217	1.22951	1.14402	1.08407		1.51284	1.14381	1.01706	1.02391	1.3352		1.30994	1.26533	1.31533	1.30945	1.22949		2.05686	2.36927	2.2605	2.40603	1.69872		2.02947	3.6414	1.58729	1.64529	2.47981		2.49019	2.71642	2.54331	2.99775	3.74868
1.03118	1.11163	1.23948	1.16048	1.08201		1.50982	1.14204	1.02483	1.03237	1.33425		1.30836	1.29261	1.31107	1.30275	1.25259		2.08097	2.50908	2.24085	2.23072	1.70812		2.04998	3.70432	1.59365	1.66175	2.46308		2.54704	2.7737	2.73697	3.01543	3.84395
1.02037	1.11068	1.23201	1.17343	1.07462		1.50619	1.12239	1.02448	1.02813	1.30072		1.31072	1.28763	1.33307	1.31312	1.232		2.09021	2.44697	2.25703	2.22773	1.73415		2.07238	3.79688	1.60899	1.67269	2.47693		2.61244	2.84967	2.82754	3.11762	3.75831
1.0273	1.11072	1.23647	1.16894	1.08063		1.53442	1.12135	1.03031	1.02452	1.31679		1.31342	1.29702	1.31505	1.29012	1.24395		2.08896	2.39925	2.36136	2.54396	1.73015		2.14996	3.89027	1.61818	1.68379	2.51829		2.67811	2.8794	2.91169	3.15536	3.9104
1.01786	1.11105	1.22584	1.17709	1.08479		1.57061	1.13141	1.02996	1.02715	1.32855		1.31674	1.29843	1.30644	1.29077	1.23715		2.11898	2.58322	2.37181	2.40666	1.81024		2.19931	3.97868	1.62609	1.70284	2.47969		2.74403	2.93928	2.92473	3.138	4.17302
1.02238	1.1114	1.23913	1.1652	1.07346		1.58895	1.1129	1.02829	1.02669	1.33611		1.31899	1.29445	1.32289	1.28277	1.22256		2.1409	2.57103	2.39126	2.45444	1.73938		2.22472	4.04964	1.63285	1.71383	2.67514		2.81318	2.94337	3.15135	3.2647	4.02568
1.01755	1.10965	1.23505	1.14144	1.07733		1.55408	1.10559	1.02762	1.02671	1.32526		1.32614	1.2947	1.34522	1.2898	1.23052		2.15837	2.59287	2.43639	2.47344	1.74459		2.2605	4.16092	1.64754	1.71778	2.74186		2.87046	2.98735	3.1726	3.21672	4.10088
1.01733	1.1086	1.22268	1.14133	1.07933		1.55999	1.1308	1.0272	1.02199	1.32425		1.32579	1.28955	1.3205	1.29992	1.22534		2.16548	2.35602	2.52706	2.51336	1.75867		2.24085	4.23259	1.65524	1.72898	2.72588		2.94221	3.00366	3.32294	3.34264	4.11494
1.01768	1.10856	1.22629	1.15208	1.07257		1.59586	1.12609	1.02907	1.02143	1.3332		1.32188	1.29309	1.31571	1.30351	1.24961		2.17234	2.6499	2.55178	2.41327	1.76973		2.25703	4.31558	1.66342	1.7492	2.84722		3.01116	3.03493	3.34023	3.50464	4.13954
1.02032	1.10844	1.23205	1.17721	1.07266		1.59846	1.10775	1.02907	1.0329	1.30189		1.32756	1.29	1.30544	1.31697	1.21953		2.17915	2.39613	2.57398	2.51046	1.73665		2.36136	4.43227	1.66961	1.74796	2.92711		3.104	3.03702	3.39113	3.53574	4.24836
1.0178	1.10814	1.23305	1.16348	1.07861		1.60424	1.09375	1.01957	1.03169	1.28707		1.32399	1.28069	1.31294	1.30462	1.22254		2.19571	2.57356	2.72758	2.34327	1.7586		2.37181	4.48862	1.67702	1.76373	2.88655		3.18789	3.07176	3.54032	3.54673	4.42806
1.02231	1.10891	1.23953	1.14501	1.07407		1.59341	1.10638	1.03167	1.03034	1.32089		1.33132	1.29349	1.30928	1.29916	1.23626		2.21455	2.52844	2.76944	2.40013	1.75884		2.39126	4.59448	1.69171	1.77859	3.04548		3.29384	3.09694	3.49369	3.64566	4.39805
1.01445	1.10856	1.24046	1.13826	1.07177		1.63008	1.09238	1.02996	1.03134	1.36815		1.33367	1.29628	1.3129	1.3008	1.2263		2.20662	2.53035	2.76942	2.45367	1.79677		2.43639	4.7048	1.70538	1.79408	3.01482		3.39958	3.11268	3.67461	3.72553	4.46955
1.0178	1.10893	1.2275	1.1668	1.07411		1.57567	1.10144	1.02686	1.03847	1.32223		1.33728	1.30775	1.33184	1.31233	1.24547		2.25459	2.45141	2.81697	2.37619	1.79336		2.52706	4.78696	1.72342	1.80028	3.22222		3.47182	3.13966	3.78293	3.79533	4.67851
1.02259	1.11168	1.24325	1.12147	1.06898		1.60393	1.10519	1.02852	1.01501	1.33315		1.33763	1.30551	1.32972	1.32019	1.24201		2.2434	2.54547	2.85162	2.51302	1.78594		2.55178	4.85921	1.73069	1.81429	3.29084		3.56504	3.14567	3.88075	3.93235	4.99913
1.01882	1.11064	1.23372	1.12738	1.07207		1.62428	1.10871	1.03154	1.03498	1.30754		1.34173	1.31932	1.33591	1.31442	1.21326		2.26297	2.43123	2.92849	2.31383	1.74331		2.57398	4.93545	1.73217	1.83413	3.23455		3.6735	3.1586	4.03038	4.03075	5.12991
1.02154	1.10841	1.23501	1.1593	1.06943		1.64628	1.12458	1.02663	1.03059	1.30457		1.3424	1.31408	1.3342	1.31214	1.21803		2.29264	2.54376	2.94171	2.58178	1.77504		2.72758	5.04577	1.74775	1.84143	3.36131		3.79414	3.16461	4.13049	4.0374	5.11967
1.01773	1.10832	1.22157	1.15535	1.08009		1.65658	1.12217	1.03031	1.01684	1.28035		1.34465	1.31806	1.34171	1.32612	1.25273		2.31956	2.53562	3.00726	2.4963	1.74825		2.76944	5.11918	1.75649	1.85254	3.36337		3.90918	3.19833	4.15931	4.04094	5.15104
1.01486	1.10875	1.24307	1.17862	1.07546		1.69269	1.1285	1.03303	1.02073	1.34719		1.35327	1.30128	1.33485	1.30161	1.22531		2.35639	2.54573	3.14023	2.63091	1.79233		2.76942	5.26182	1.76853	1.86201	3.59941		4.05943	3.21603	4.09979	4.10838	5.24985
1.01733	1.10961	1.26336	1.12513	1.07425		1.65502	1.11877	1.03053	1.01503	1.42945		1.34893	1.32125	1.32618	1.31701	1.24364		2.32992	2.63406	3.20492	2.48668	1.7886		2.81697	5.34556	1.78789	1.8697	3.72301		4.16401	3.23776	4.31091	4.34449	5.38035
1.02127	1.10956	1.28113	1.11415	1.07563		1.65864	1.11497	1.02672	1.01573	1.42942		1.35208	1.3228	1.33695	1.33277	1.25299		2.35541	2.58021	3.22467	2.44364	1.78989		2.85162	5.3925	1.81088	1.8936	3.76206		4.31567	3.25212	4.39634	4.33833	5.38403
1.02319	1.11045	1.28194	1.1569	1.06673		1.69192	1.12414	1.02206	1.01695	1.4042		1.35528	1.32937	1.33971	1.31947	1.23665		2.38395	2.82357	3.25396	2.52992	1.75271		2.92849	5.53904	1.80537	1.90494	3.7573		4.46847	3.28512	4.44242	4.25327	5.59808
1.02094	1.10895	1.28385	1.13598	1.07683		1.67648	1.12198	1.03299	1.01858	1.34612		1.35874	1.32647	1.3519	1.31282	1.22897		2.38696	2.74002	3.36111	2.56105	1.75378		2.94171	5.62192	1.81759	1.91972	3.6354		4.59926	3.3556	4.50511	4.45646	5.47535
1.00904	1.10857	1.27921	1.18767	1.07476		1.64511	1.10729	1.03311	1.01218	1.3686		1.36657	1.33018	1.36812	1.32623	1.24059		2.40991	2.75059	3.38551	2.63375	1.78724		3.00726	5.68072	1.82808	1.9234	4.00941		4.75965	3.50384	4.65496	4.51518	5.70108
1.02039	1.10908	1.28353	1.16423	1.07269		1.67563	1.12442	1.02752	1.02479	1.38108		1.36096	1.33372	1.36251	1.32635	1.21376		2.41366	2.77851	3.48579	2.53543	1.79573		3.14023	5.78438	1.83975	1.92888	4.08197		4.89425	3.63294	4.64433	4.66867	5.81178
1.0095	1.10844	1.27127	1.13105	1.07324		1.71074	1.13763	1.0236	1.01852	1.46546		1.36356	1.33317	1.35169	1.33685	1.21544		2.4383	2.60106	3.50156	2.69394	1.77278		3.20492	5.86071	1.86205	1.95256	4.05004		5.06005	3.72295	4.9547	4.76196	5.80981
1.01676	1.10807	1.26383	1.11357	1.07153		1.70393	1.14283	1.02367	1.02329	1.4355		1.3685	1.32811	1.37285	1.34469	1.25525		2.469	2.70442	3.7575	2.56241	1.7458		3.22467	5.93789	1.889	1.96151	4.27401		5.173	3.81677	4.64403	4.81564	5.6987
1.02969	1.10915	1.27145	1.16675	1.08005		1.71195	1.15663	1.02808	1.03435	1.44025		1.37054	1.33129	1.37964	1.36314	1.25047		2.4941	2.64211	3.71202	2.64737	1.83754		3.25396	6.06858	1.89492	1.98246	4.36678		5.34363	3.92207	4.91871	4.92304	5.95273
1.01781	1.10838	1.26504	1.12948	1.07269		1.71931	1.1427	1.02633	1.02528	1.41319		1.37332	1.3402	1.39683	1.33552	1.23728		2.50635	2.64925	3.8642	2.61341	1.7714		3.36111	6.10114	1.90979	1.9988	4.47058		5.47065	4.01836	5.10031	4.95291	5.87482
1.01589	1.10766	1.25919	1.16452	1.0767		1.73452	1.14327	1.03251	1.02247	1.39479		1.37967	1.34203	1.37102	1.33811	1.25605		2.49496	2.69686	3.91001	2.69524	1.81418		3.38551	6.15705	1.91785	2.02193	4.42223		5.61008	4.07921	5.13563	5.02522	5.79035
1.02609	1.10749	1.25382	1.15295	1.08204		1.71084	1.1392	1.02572	1.02109	1.41218		1.3759	1.34093	1.37527	1.34259	1.23708		2.51998	2.69514	4.07526	2.55061	1.79399		3.48579	6.30872	1.94061	2.03308	4.64472		5.77549	4.17716	5.3148	5.05903	6.21003
1.01743	1.10762	1.24573	1.16471	1.07743		1.71989	1.1395	1.02934	1.0215	1.3827		1.38111	1.34202	1.37163	1.33444	1.21314		2.53408	2.63126	4.04349	2.58227	1.82758		3.50156	6.35408	1.9523	2.0605	4.48138		5.95125	4.26417	5.23601	5.06544	6.3919
1.01815	1.10684	1.24753	1.141	1.075		1.73814	1.12725	1.02863	1.01124	1.38485		1.3799	1.33551	1.35218	1.35764	1.21998		2.56087	2.48064	4.23666	2.62097	1.84475		3.7575	6.38338	1.96529	2.0712	4.74042		6.0948	4.34549	5.54678	5.21505	6.38825
1.01554	1.10601	1.24472	1.13995	1.07868		1.69972	1.12825	1.03457	1.03993	1.33951		1.38471	1.33537	1.39382	1.35622	1.21984		2.56886	2.64127	4.32617	2.69592	1.80565		3.71202	6.50229	1.97854	2.0856	5.02902		6.22988	4.5007	5.45898	5.35416	6.68041
1.01583	1.10692	1.24852	1.12563	1.07926		1.78883	1.12644	1.0246	1.02212	1.34435		1.3834	1.345	1.39838	1.36185	1.22183		2.60716	2.67844	4.23873	2.80201	1.85477		3.8642	6.62265	2.00287	2.08538	5.15141		6.38833	4.60347	5.58103	5.51431	6.66451
1.01871	1.10633	1.22806	1.14439	1.08001		1.79552	1.12599	1.02905	1.03196	1.36347		1.39386	1.34094	1.37466	1.34161	1.24156		2.58638	2.67399	4.34483	2.72674	1.83112		3.91001	6.64719	2.00524	2.10384	5.26662		6.54906	4.73237	5.38877	5.44681	6.69323
1.01918	1.10634	1.22905	1.11366	1.07771		1.76314	1.11766	1.02721	1.01117	1.31838		1.39072	1.34475	1.35911	1.35635	1.22638		2.60031	2.68797	4.47232	2.84751	1.80531		4.07526	6.76345	2.02916	2.1121	5.19142		6.69238	4.91277	5.84452	5.52517	6.66442
1.01144	1.1059	1.23785	1.1497	1.07875		1.80166	1.12083	1.02422	1.0208	1.36116		1.39759	1.3465	1.34185	1.35087	1.2463		2.64053	2.47409	4.57094	2.5927	1.80944		4.04349	6.96248	2.04094	2.12493	5.33072		6.8819	5.06777	5.76427	5.5807	6.57652
1.02409	1.10675	1.23512	1.15082	1.07795		1.80403	1.12478	1.03262	1.0317	1.35561		1.39075	1.34964	1.34271	1.36074	1.23965		2.64621	2.64415	4.56503	2.75357	1.82251		4.23666	6.88753	2.06161	2.1423	5.31078		7.01839	5.23992	5.8663	5.7074	6.96689
1.02358	1.1061	1.23578	1.1457	1.08028		1.75656	1.14332	1.03228	1.02287	1.39792		1.39938	1.35346	1.38136	1.37989	1.22425		2.66766	2.70089	4.82471	2.84736	1.82481		4.32617	7.07033	2.07009	2.16087	5.83733		7.17119	5.40042	5.86754	5.72185	6.79865
1.01473	1.10498	1.24397	1.12235	1.06952		1.8332	1.12975	1.03534	1.02459	1.36174		1.40319	1.35886	1.43687	1.37151	1.23095		2.704	2.48297	4.96369	2.72636	1.78136		4.23873	7.21463	2.07875	2.18312	5.98278		7.35295	5.55612	5.90816	5.92882	7.11988
1.0174	1.10769	1.25004	1.13191	1.08129		1.81162	1.13038	1.02905	1.01258	1.37756		1.40943	1.36448	1.45307	1.38305	1.21957		2.72437	2.51008	4.99667	2.76893	1.81908		4.34483	7.17909	2.09196	2.21064	5.92222		7.49183	5.73039	6.11058	6.11915	7.15416
1.01365	1.10529	1.2292	1.13573	1.07875		1.82879	1.1318	1.03854	1.03175	1.35201		1.41113	1.36755	1.44825	1.39299	1.21509		2.75061	2.4856	5.08635	2.6812	1.8304		4.47232	7.31158	2.12299	2.2184	5.84016		7.63436	5.94395	5.98912	5.96691	7.16826
1.02363	1.10554	1.23965	1.11669	1.07829		1.73586	1.1287	1.03011	1.03059	1.34369		1.41422	1.36141	1.46947	1.39318	1.23795		2.75818	2.36797	5.11061	2.89369	1.84729		4.57094	7.40934	2.1397	2.24935	6.12059		7.7842	6.15291	6.20541	6.09324	7.49595
1.01679	1.10634	1.24194	1.15596	1.07495		1.77554	1.11188	1.03106	1.01445	1.32912		1.41833	1.3608	1.46497	1.37645	1.25024		2.77928	2.55279	5.13326	2.71327	1.83642		4.56503	7.36668	2.16566	2.28478	6.22708		7.94454	6.32032	6.36629	6.14874	7.39494
1.02026	1.1074	1.2431	1.14206	1.07684		1.75699	1.11446	1.03049	1.01545	1.32997		1.43081	1.37056	1.45923	1.40285	1.24937		2.79217	2.6039	5.33027	2.82668	1.82247		4.82471	7.47794	2.17864	2.30391	6.52277		8.06563	6.45467	6.2508	6.17474	7.73014
1.01856	1.10507	1.23447	1.13022	1.07191		1.76103	1.10961	1.03523	1.02162	1.33786		1.44228	1.36449	1.45638	1.37973	1.22712		2.79068	2.65629	5.34348	2.91471	1.85331		4.96369	7.61356	2.19155	2.34211	6.61856		8.19476	6.65478	6.26169	6.33485	7.97467
1.02345	1.10694	1.23022	1.13041	1.07534		1.81324	1.11217	1.03948	1.03198	1.37715		1.4468	1.3715	1.4649	1.3998	1.25329		2.79473	2.53419	5.4566	3.03818	1.83526		4.99667	7.56791	2.22556	2.37033	6.6305		8.25819	6.81206	6.37089	6.26985	8.16503
1.02125	1.1063	1.21381	1.15345	1.07556		1.77154	1.11084	1.03692	1.03388	1.34507		1.43828	1.37584	1.47423	1.39559	1.24014		2.82697	2.39019	5.50749	2.89301	1.88352		5.08635	7.64688	2.23752	2.38454	6.58184		8.34901	6.96327	6.46561	6.19972	8.30422
1.0271	1.10689	1.20982	1.12956	1.08497		1.77937	1.11287	1.0325	1.0336	1.35613		1.45373	1.37569	1.4328	1.37848	1.23801		2.84443	2.47561	5.64703	2.92709	1.87519		5.11061	7.76287	2.24723	2.41536	6.86906		8.44671	7.12783	6.54437	6.29899	8.12034
1.01993	1.1082	1.21015	1.15323	1.08078		1.7807	1.08596	1.03631	1.02139	1.38014		1.45151	1.37719	1.41464	1.38222	1.25431		2.84516	2.43253	5.61947	3.12311	1.88569		5.13326	7.76041	2.26505	2.43805	7.11656		8.51641	7.28878	6.59263	6.48101	8.3287
1.02124	1.10669	1.2088	1.11005	1.08286		1.74807	1.09923	1.03458	1.02666	1.37497		1.44863	1.38274	1.3842	1.39808	1.25122		2.83886	2.58512	5.75955	2.89176	1.89816		5.33027	7.83108	2.28849	2.45104	7.47628		8.51259	7.48223	6.71314	6.44326	8.63879
1.01504	1.10501	1.21189	1.1368	1.08226		1.75988	1.12049	1.03386	1.02202	1.33354		1.4525	1.38028	1.36623	1.40024	1.23667		2.88358	2.52845	5.63171	2.90582	1.957		5.34348	7.92224	2.31665	2.48291	7.32169		8.66854	7.60755	6.66911	6.74074	8.59112
1.02193	1.10816	1.22356	1.11373	1.07686		1.74934	1.11022	1.03494	1.01989	1.376		1.45872	1.38817	1.37341	1.39083	1.26606		2.89302	2.46926	5.9319	2.98913	1.9716		5.4566	7.90644	2.33418	2.50169	7.52828		8.68511	7.79223	6.55026	6.71738	8.67095
1.02184	1.10423	1.21467	1.09708	1.08422		1.78273	1.096	1.03617	1.02915	1.37356		1.46163	1.3881	1.38834	1.39569	1.24542		2.90448	2.59703	5.83296	3.03306	1.94483		5.50749	7.98549	2.3609	2.52909	7.67957		8.71232	7.95137	6.67668	6.4432	8.72828
1.02673	1.1056	1.19949	1.10189	1.08417		1.81719	1.08456	1.03051	1.01987	1.41706		1.46838	1.39332	1.40142	1.38149	1.27484		2.92696	2.54208	6.00689	3.07693	1.96047		5.64703	8.10256	2.39803	2.55083	7.93487		8.73544	8.09621	6.71072	6.73362	8.58456
1.01778	1.10912	1.20321	1.11248	1.08455		1.74956	1.10739	1.02928	1.02252	1.39178		1.46573	1.39052	1.40847	1.38172	1.25797		2.96676	2.46664	6.07827	2.91027	1.98038		5.61947	8.06657	2.42376	2.60256	8.11781		8.73695	8.23346	6.9335	6.73406	8.7719
1.02238	1.10648	1.19845	1.14833	1.09026		1.74732	1.10569	1.03904	1.03417	1.34589		1.46675	1.40556	1.40232	1.38927	1.27035		2.9611	2.54896	6.13399	3.00075	1.95184		5.75955	8.11149	2.45134	2.64436	8.2293		8.72828	8.36758	7.00189	6.81569	8.845
1.0189	1.1059	1.21548	1.15335	1.08355		1.79604	1.10831	1.0387	1.02508	1.36764		1.47146	1.40109	1.39047	1.39243	1.23942		2.99311	2.6923	6.19787	3.01604	1.99601		5.63171	8.25132	2.47307	2.69103	8.33539		8.71035	8.47093	6.8948	6.9104	8.86551
1.01888	1.10238	1.20702	1.14481	1.09045		1.872	1.09851	1.035	1.02172	1.33133		1.47176	1.39598	1.41677	1.39887	1.27701		2.98356	2.49803	6.24429	3.0297	1.96854		5.9319	8.25613	2.50214	2.73514	8.53986		8.72717	8.58798	6.77998	6.80085	8.89219
1.0089	1.10259	1.20027	1.11897	1.08791		1.80697	1.09172	1.03605	1.02211	1.37077		1.48482	1.40245	1.4246	1.40465	1.25218		2.99091	2.50892	6.4302	3.09585	1.9748		5.83296	8.28656	2.53384	2.77349	8.79913		8.7214	8.68525	6.75082	6.89704	9.36933
1.0145	1.10076	1.21007	1.11791	1.08382		1.81862	1.08304	1.03636	1.018	1.37991		1.48754	1.40444	1.41245	1.41613	1.23915		3.02909	2.69015	6.5224	3.07897	2.00562		6.00689	8.38373	2.56845	2.82564	8.91881		8.87219	8.78469	6.74414	6.96976	9.15364
1.02537	1.10072	1.19897	1.14009	1.0794		1.87512	1.09224	1.03067	1.02339	1.39559		1.4971	1.39382	1.43312	1.41708	1.25595		3.0452	2.52265	6.68758	3.04654	1.98753		6.07827	8.39537	2.59143	2.86161	8.97743		8.69261	8.89113	6.78155	6.94325	9.28722
1.02376	1.10395	1.19779	1.12438	1.08386		1.82427	1.07698	1.0376	1.02522	1.39503		1.50191	1.39103	1.42402	1.42569	1.28322		3.04637	2.68655	6.67671	3.11758	2.03826		6.13399	8.44413	2.62486	2.90409	9.41536		8.8541	8.97736	7.0762	7.12458	9.30219
1.01485	1.10438	1.19858	1.13349	1.08909		1.85428	1.09678	1.03311	1.02883	1.3722		1.49978	1.39694	1.4062	1.40111	1.25756		3.0616	2.61754	6.65102	3.13425	2.01307		6.19787	8.56804	2.65928	2.92797	9.34624		8.86467	9.01627	6.92276	7.05247	9.34081
1.0188	1.10226	1.19485	1.11272	1.08157		1.85807	1.10849	1.03288	1.03085	1.37454		1.50734	1.39813	1.40844	1.41105	1.28135		3.06839	2.73403	6.77948	3.25659	2.02313		6.24429	8.53597	2.70188	2.97317	9.55922		8.89113	9.07245	6.99405	7.14293	9.62621
1.01168	1.10509	1.20968	1.14436	1.08635		1.87972	1.09746	1.03009	1.02831	1.37162		1.51024	1.40379	1.39124	1.41807	1.25562		3.05087	2.53696	6.94184	3.11101	2.01815		6.4302	8.60148	2.73346	3.00979	9.78585		8.82939	9.18856	7.17167	7.19454	9.74949
1.01158	1.10389	1.21016	1.13572	1.08551		1.88045	1.09982	1.03902	1.03086	1.38102		1.52527	1.38332	1.41345	1.41525	1.26249		3.09981	2.65185	7.07946	3.26452	1.99683		6.5224	8.6719	2.7623	3.05596	10.0384		8.70118	9.22164	7.26241	7.22782	9.79359
1.02316	1.10148	1.21867	1.13815	1.08227		1.84529	1.10481	1.04374	1.03936	1.4004		1.53462	1.40419	1.41159	1.41299	1.27609		3.09424	2.70148	6.95192	3.36451	2.0342		6.68758	8.66533	2.81079	3.10515	10.0913		8.82909	9.26194	7.43949	7.25455	9.72941
1.02284	1.10478	1.21715	1.13778	1.07533		1.83513	1.08911	1.04677	1.02171	1.46178		1.52523	1.40693	1.40359	1.41911	1.30477		3.1263	2.72868	7.13662	3.22369	2.02983		6.67671	8.6642	2.83903	3.15526	10.1502		8.7298	9.32711	7.24062	7.13921	9.9942
1.02137	1.10625	1.21358	1.17074	1.08416		1.86288	1.09325	1.04211	1.01469	1.47747		1.53002	1.41602	1.3879	1.41908	1.29919		3.1349	2.65529	7.15993	3.0648	1.96226		6.65102	8.77018	2.85682	3.19215	10.3012		8.68055	9.37419	7.29093	7.09138	9.85772
1.02873	1.10265	1.21198	1.11861	1.0887		1.88328	1.0957	1.04307	1.02308	1.49397		1.52729	1.41864	1.37907	1.43125	1.30558		3.11768	2.62133	7.29911	3.24307	2.03162		6.77948	8.72907	2.88032	3.24144	10.2831		8.70052	9.4409	7.2933	7.41142	9.93787
1.02141	1.10206	1.21078	1.14569	1.09474		1.91373	1.08845	1.03912	1.02165	1.53646		1.53434	1.41688	1.39959	1.42761	1.28575		3.16311	2.81859	7.27436	3.32087	2.03569		6.94184	8.74239	2.93578	3.30373	10.4497		8.82142	9.45887	7.36755	7.36356	9.95508
1.0198	1.10566	1.21994	1.1319	1.10021		1.8579	1.07521	1.04645	1.0211	1.50429		1.53833	1.41054	1.40571	1.43935	1.26429		3.14707	2.79597	7.19923	3.42053	2.10418		7.07946	8.80333	2.97697	3.34946	10.5664		8.69997	9.44998	7.47363	7.26604	10.2102
1.02454	1.10107	1.21323	1.13848	1.09834		1.89962	1.10021	1.04118	1.02199	1.479		1.53964	1.43458	1.40137	1.42004	1.2686		3.19187	2.70287	7.25263	3.12689	2.07752		6.95192	8.7879	3.00849	3.3841	10.6659		8.67415	9.5104	7.3663	7.31053	10.1375
1.01916	1.10098	1.21376	1.1683	1.10336		1.90842	1.10447	1.04516	1.02428	1.52596		1.54061	1.43733	1.4055	1.45124	1.27795		3.26484	2.63197	7.45059	3.08951	2.09392		7.13662	8.77608	3.04868	3.42693	10.773		8.70135	9.50769	7.30533	7.29534	10.1972
1.02865	1.10213	1.20643	1.10755	1.09438		1.8741	1.09842	1.04511	1.02629	1.55439		1.53867	1.43417	1.40493	1.4689	1.30301		3.26323	2.74515	7.43896	3.3282	2.08715		7.15993	8.83902	3.10655	3.483	10.8833		8.76953	9.52652	7.52443	7.46656	10.0841
1.0207	1.10292	1.20824	1.12295	1.10089		1.88581	1.08718	1.04255	1.02066	1.581		1.53901	1.43993	1.39198	1.44656	1.31256		3.2229	2.67683	7.50433	3.26869	2.0937		7.29911	8.87633	3.15468	3.51908	10.9453		8.66263	9.51682	7.43777	7.61908	10.003
1.02284	1.10021	1.21055	1.11423	1.10249		1.93276	1.07973	1.03853	1.0182	1.59036		1.54336	1.43488	1.39728	1.43392	1.272		3.24903	2.55935	7.49221	3.22682	2.10304		7.27436	8.88176	3.20842	3.55966	11.0857		8.85558	9.52632	7.56266	7.58832	10.263
1.02247	1.10068	1.21277	1.1224	1.09588		1.94595	1.10665	1.04387	1.01651	1.56771		1.54555	1.44152	1.40286	1.46935	1.29662		3.27961	2.44407	7.52499	3.34069	2.09379		7.19923	8.98155	3.24439	3.61992	11.1452		8.58884	9.53361	7.49073	7.53647	10.375
1.02099	1.1004	1.20612	1.13723	1.09055		1.92095	1.11018	1.03896	1.01366	1.50548		1.54982	1.44651	1.40364	1.45147	1.288		3.32046	2.61292	7.53297	3.23971	2.11115		7.25263	8.99995	3.28757	3.67569	11.1857		8.78319	9.52133	7.59063	7.43975	10.1585
1.02927	1.10111	1.21012	1.1184	1.08891		1.93676	1.10207	1.04052	1.0194	1.4752		1.55209	1.43886	1.42787	1.46256	1.29743		3.33281	2.50351	7.5683	3.34027	2.13264		7.45059	9.02889	3.31537	3.72634	11.2521		8.76364	9.51199	7.56432	7.54275	10.291
1.01612	1.10002	1.20539	1.12648	1.09951		1.94591	1.11274	1.05252	1.02861	1.46149		1.55226	1.44845	1.40512	1.4392	1.2985		3.34056	2.54004	7.63686	3.50077	2.13318		7.43896	9.09184	3.35764	3.78667	11.3418		8.75613	9.53135	7.55929	7.64848	10.1591
1.01767	1.10055	1.20687	1.12348	1.08589		1.95829	1.11694	1.03927	1.02418	1.45061		1.55541	1.43726	1.38344	1.46977	1.29277		3.34761	2.56511	7.7685	3.45411	2.15139		7.50433	9.07536	3.39207	3.84608	11.5178		8.74295	9.5294	7.80787	7.57865	10.4352
1.02494	1.10003	1.20327	1.14917	1.082		2.01388	1.11841	1.05527	1.02295	1.42477		1.54933	1.44073	1.42637	1.47647	1.29161		3.39165	2.71085	7.78544	3.33714	2.12101		7.49221	9.04921	3.45283	3.91158	11.6233		8.79392	9.50718	7.67955	7.50641	10.4518
1.02438	1.10067	1.20288	1.15341	1.08532		2.00143	1.10564	1.053	1.03055	1.43036		1.55887	1.46688	1.42664	1.46759	1.29326		3.43766	2.55674	7.73549	3.57274	2.17264		7.52499	9.09195	3.52616	3.98279	11.6261		8.76551	9.47244	7.83374	7.59692	10.4138
1.01888	1.09999	1.20814	1.13992	1.08294		2.03369	1.1118	1.04284	1.0153	1.43543		1.55787	1.46577	1.42498	1.45441	1.30771		3.45105	2.53126	7.73566	3.40034	2.17397		7.53297	9.07339	3.58203	4.05321	11.7058		8.66643	9.53868	7.71099	7.67211	10.5367
1.0249	1.09964	1.20385	1.08711	1.07431		2.00556	1.12426	1.04703	1.02387	1.42162		1.55369	1.47178	1.42861	1.47664	1.31862		3.51422	2.55221	7.78154	3.5228	2.19158		7.5683	9.07251	3.65873	4.1246	11.6588		8.65455	9.48773	7.85035	7.69446	10.8573
1.01771	1.10092	1.20371	1.12876	1.08233		1.97576	1.12374	1.04676	1.0288	1.42522		1.55338	1.44502	1.40396	1.48305	1.29487		3.4949	2.62763	8.06503	3.65837	2.17098		7.63686	9.13223	3.70133	4.18239	11.9886		8.61928	9.53089	7.95291	7.55904	10.7636
1.02059	1.10245	1.19783	1.12637	1.07083		2.00006	1.13548	1.04205	1.02145	1.42128		1.55424	1.46834	1.43286	1.46001	1.29443		3.49041	2.63834	7.87471	3.6336	2.19952		7.7685	9.13757	3.74864	4.25335	11.9356		8.74965	9.53457	7.95902	7.92208	10.9335
1.01964	1.0989	1.19651	1.14315	1.07173		1.94399	1.1359	1.05347	1.02355	1.39145		1.55405	1.46246	1.43236	1.46924	1.29616		3.48164	2.55317	7.99872	3.55269	2.24465		7.78544	9.14367	3.78586	4.32341	12.0257		8.78208	9.55114	7.9116	7.71132	10.685
1.02468	1.10082	1.20379	1.12183	1.07594		1.94994	1.1378	1.04389	1.02622	1.44395		1.56711	1.48576	1.4504	1.47563	1.29797		3.50997	2.66759	8.03026	3.60642	2.26675		7.73549	9.19593	3.86244	4.36547	12.0903		8.75584	9.52719	8.03089	7.91092	10.565
1.01981	1.10081	1.18713	1.13014	1.06327		1.92736	1.13207	1.05235	1.01891	1.4266		1.55624	1.46996	1.43064	1.46302	1.29636		3.48445	2.6763	7.90537	3.44293	2.29314		7.73566	9.2465	3.90264	4.45416	12.1442		8.61052	9.53794	7.9998	7.72558	10.8174
1.01763	1.09883	1.19315	1.12405	1.08179		1.92494	1.12754	1.04924	1.018	1.41691		1.56669	1.49027	1.41389	1.47896	1.31338		3.51577	2.57555	7.99357	3.63022	2.27974		7.78154	9.18177	3.97206	4.49479	12.0934		8.47105	9.52057	8.0724	7.82232	10.9153
1.03003	1.09893	1.1972	1.13158	1.06916		1.95447	1.12369	1.04802	1.03238	1.44188		1.57072	1.48686	1.41017	1.47824	1.3027		3.56503	2.65242	7.96518	3.52345	2.2834		8.06503	9.25621	4.06411	4.5709	12.1326		8.66704	9.50954	8.25456	7.8943	11.2143
1.02261	1.09876	1.19747	1.13384	1.06782		1.9625	1.11042	1.04686	1.02364	1.41998		1.56493	1.49699	1.41663	1.49292	1.29294		3.56676	2.5758	8.16853	3.42714	2.26694		7.87471	9.28661	4.10422	4.67414	12.3332		8.7317	9.51678	8.03382	7.85337	10.9543
1.01913	1.10092	1.20068	1.15326	1.07086		1.94722	1.12486	1.04706	1.02295	1.41561		1.57779	1.50595	1.39972	1.50213	1.31121		3.58113	2.50595	8.12977	3.72897	2.30927		7.99872	9.2654	4.18214	4.74641	12.2954		8.69771	9.50894	8.2324	7.76129	11.269
1.02421	1.09979	1.20412	1.14046	1.07825		1.96509	1.12257	1.05247	1.02547	1.42207		1.5755	1.48416	1.39114	1.47659	1.30529		3.59991	2.60928	8.10708	3.73453	2.27413		8.03026	9.30192	4.27534	4.77617	12.3202		8.6724	9.45028	8.18553	7.7794	11.4579
1.01658	1.10022	1.20831	1.14885	1.0724		2.01975	1.11403	1.04464	1.02629	1.4145		1.58138	1.50731	1.39839	1.49283	1.31036		3.61369	2.67142	8.08561	3.62619	2.29877		7.90537	9.31518	4.32889	4.84622	12.3542		8.75703	9.47136	8.14161	7.98778	11.5838
1.02173	1.09986	1.21402	1.10206	1.06553		1.94517	1.12005	1.03905	1.03379	1.44504		1.58431	1.4928	1.39754	1.49657	1.31123		3.64538	2.63602	8.16815	3.73409	2.32692		7.99357	9.35443	4.3867	4.92605	12.38		8.7789	9.47752	8.08601	7.98966	11.2906
1.01925	1.09911	1.21495	1.18017	1.07692		1.93504	1.11548	1.04014	1.02978	1.44589		1.58266	1.51574	1.39183	1.52832	1.2814		3.67624	2.61377	8.30043	3.83163	2.35214		7.96518	9.38955	4.45202	4.97884	12.3554		8.4635	9.46032	8.21018	8.0121	11.2264
1.02045	1.09955	1.212	1.17643	1.07509		1.96121	1.11608	1.05463	1.03199	1.50757		1.58689	1.51176	1.40494	1.50796	1.30538		3.70332	2.70674	8.18262	3.86522	2.35769		8.16853	9.39672	4.52956	5.01775	12.5397		8.84177	9.45636	8.28045	7.99648	11.2652
1.02928	1.1006	1.20498	1.11969	1.07087		1.95969	1.10165	1.04696	1.03369	1.52181		1.58688	1.49851	1.38313	1.48524	1.2951		3.70705	2.60436	8.37796	3.70822	2.38041		8.12977	9.35166	4.58331	5.09347	12.5899		8.75312	9.47781	8.3164	7.90571	11.3254
1.01512	1.10074	1.21075	1.11508	1.0729		1.95457	1.10623	1.05538	1.03123	1.54474		1.58659	1.49361	1.3816	1.48565	1.30191		3.74998	2.74051	8.25961	3.57884	2.35018		8.10708	9.36091	4.676	5.13184	12.6467		8.65813	9.46968	8.40263	7.80469	11.2823
1.02013	1.10111	1.20962	1.15298	1.0747		1.9413	1.09826	1.05191	1.03174	1.61709		1.59078	1.5148	1.39362	1.51417	1.29564		3.77996	2.71508	8.2855	3.90277	2.37904		8.08561	9.35891	4.74603	5.13316	12.7794		8.63968	9.48462	8.42843	8.17937	11.7719
1.01759	1.09945	1.20162	1.08948	1.07702		1.95165	1.09696	1.05378	1.02208	1.59507		1.58797	1.51695	1.43588	1.51844	1.33123		3.78986	2.69353	8.32595	3.85693	2.38722		8.16815	9.38556	4.78482	5.20042	12.7546		8.40245	9.46747	8.53627	8.03284	11.8054
1.01459	1.10004	1.1991	1.16437	1.0689		1.96557	1.10521	1.06508	1.02576	1.54995		1.59229	1.49405	1.42944	1.50639	1.32549		3.79578	2.59236	8.33586	3.9063	2.3663		8.30043	9.4246	4.85606	5.30661	12.7376		8.4997	9.42551	8.55025	8.05979	11.5791
1.02109	1.10141	1.19454	1.11142	1.06549		1.972	1.1167	1.06198	1.03299	1.55311		1.6018	1.48433	1.44485	1.51083	1.3292		3.81814	2.61336	8.35214	3.73215	2.35232		8.18262	9.45012	4.90148	5.32792	12.7568		8.68292	9.40042	8.62031	8.05941	11.6614
1.01754	1.10043	1.19647	1.1392	1.07285		1.99761	1.12251	1.05869	1.02885	1.58152		1.61265	1.52904	1.44942	1.51378	1.3304		3.83784	2.7575	8.54801	3.73715	2.3634		8.37796	9.45036	4.97534	5.34385	12.8258		8.89537	9.4175	8.54021	7.9779	11.9444
1.01534	1.09868	1.21018	1.08068	1.06339		1.97626	1.10898	1.06184	1.01378	1.54946		1.613	1.50688	1.43942	1.54301	1.30204		3.83978	2.74046	8.46888	3.86039	2.34933		8.25961	9.45272	4.99235	5.48802	12.8935		8.74464	9.42899	8.69525	7.82661	11.904
1.02079	1.0993	1.20955	1.14128	1.07566		1.93303	1.11788	1.05855	1.01923	1.55089		1.61495	1.51205	1.44615	1.52917	1.32462		3.89045	2.74178	8.48984	3.84231	2.45107		8.2855	9.49415	5.08628	5.55889	12.9217		8.55914	9.43269	8.61037	8.08619	11.55
1.02169	1.09842	1.20947	1.12884	1.07211		1.96379	1.10577	1.05886	1.02139	1.49999		1.62089	1.52417	1.43246	1.50837	1.30728		3.90324	2.65449	8.57005	3.78438	2.43482		8.32595	9.48402	5.13497	5.55223	12.813		8.50252	9.38786	8.48312	8.03378	11.5354
1.01771	1.09971	1.20382	1.12624	1.07387		1.9408	1.09644	1.05968	1.03352	1.49343		1.62686	1.53358	1.42801	1.5558	1.32574		3.9208	2.66852	8.49406	3.96015	2.40777		8.33586	9.51763	5.16364	5.61118	12.9793		8.64492	9.38697	8.73968	8.29036	11.961
1.02726	1.09882	1.20324	1.12936	1.07462		1.98459	1.10602	1.05716	1.02962	1.48345		1.62696	1.51632	1.45979	1.50967	1.31597		3.94683	2.55822	8.64606	3.88135	2.39428		8.35214	9.52389	5.22081	5.67823	12.8886		8.66472	9.38584	8.56588	8.06492	11.9666
1.01627	1.09955	1.19704	1.12377	1.0768		1.99172	1.09995	1.05302	1.02017	1.48035		1.62384	1.54134	1.46035	1.53168	1.3298		3.9747	2.60774	8.69236	3.87172	2.48589		8.54801	9.52239	5.29759	5.70381	13.0527		8.64123	9.40839	8.86771	8.04258	12.2371
1.01721	1.09923	1.1934	1.14675	1.0725		1.98624	1.10368	1.06446	1.02672	1.4783		1.63035	1.52481	1.45441	1.53588	1.33104		3.97881	2.55586	8.47934	3.92167	2.49498		8.46888	9.54175	5.3456	5.7471	13.0787		8.68358	9.47443	8.83524	8.04746	12.2439
1.01249	1.09817	1.19602	1.14501	1.08225		2.01321	1.12739	1.06395	1.03399	1.51845		1.62927	1.52463	1.43924	1.5423	1.343		4.01872	2.6728	8.5007	3.85184	2.51756		8.48984	9.54563	5.41472	5.81124	13.0034		8.51882	9.45064	8.74464	8.05876	12.3193
1.0306	1.09806	1.19849	1.12208	1.0746		2.00985	1.13602	1.05319	1.03505	1.48348		1.62774	1.53433	1.44715	1.53421	1.32688		4.00951	2.74582	8.45025	3.829	2.48641		8.57005	9.52179	5.47503	5.83705	12.9574		8.75611	9.43536	8.95341	8.26765	11.6652
1.01313	1.09914	1.19834	1.13687	1.07035		1.93434	1.14731	1.06097	1.02476	1.55103		1.62712	1.52916	1.41921	1.53309	1.35336		4.03259	2.64588	8.54457	3.99901	2.58459		8.49406	9.47611	5.54703	5.84971	13.256		8.65915	9.44817	8.98956	8.26237	11.7928
1.01979	1.09885	1.20213	1.12589	1.07054		1.97868	1.13426	1.07161	1.03688	1.53957		1.62917	1.52229	1.42997	1.53858	1.33397		4.1064	2.76074	8.43694	3.93238	2.49153		8.64606	9.48445	5.58183	5.93743	13.2645		8.585	9.44381	8.91035	8.27798	12.0318
1.03009	1.09816	1.19578	1.10923	1.0692		1.94456	1.1326	1.05167	1.03771	1.52686		1.62873	1.52577	1.43856	1.52016	1.33324		4.10837	2.57572	8.54159	3.90872	2.53407		8.69236	9.44516	5.63533	6.0003	13.071		8.72092	9.41835	8.74036	8.19331	12.2308
1.02301	1.09858	1.19504	1.11884	1.07334		1.93318	1.12326	1.06683	1.04708	1.55266		1.63274	1.51857	1.42767	1.55429	1.33758		4.101	2.70452	8.56411	3.87867	2.54512		8.47934	9.46234	5.71099	6.01222	13.1837		8.61255	9.41011	8.89016	8.07902	12.3904
1.01788	1.09903	1.19694	1.10898	1.07498		2.0046	1.11216	1.05639	1.02687	1.54602		1.63573	1.54499	1.4294	1.53045	1.35209		4.1188	2.56497	8.50388	3.92581	2.54312		8.5007	9.48083	5.77861	6.09889	13.2209		8.50374	9.42521	8.85538	8.25241	12.1638
1.01942	1.09837	1.19834	1.12482	1.06783		1.99384	1.1221	1.06895	1.019	1.58374		1.63305	1.55258	1.4645	1.53541	1.32106		4.18522	2.59242	8.5847	3.88381	2.516		8.45025	9.47338	5.82734	6.15447	13.3821		8.53936	9.41279	8.96652	8.14735	11.8958
1.01799	1.09919	1.20659	1.11622	1.06947		2.04792	1.1172	1.06036	1.02527	1.54596		1.63616	1.55879	1.45841	1.57069	1.32624		4.14702	2.64567	8.61722	3.87995	2.50097		8.54457	9.52767	5.88732	6.13163	13.2733		8.71814	9.36088	8.91377	8.29277	12.176
1.03037	1.09789	1.20955	1.15703	1.06422		2.04551	1.11676	1.06457	1.02766	1.54811		1.6408	1.53877	1.47216	1.53798	1.32787		4.20115	2.48917	8.57462	4.06951	2.57305		8.43694	9.53439	5.89787	6.1653	13.3948		8.58582	9.38233	9.07872	8.34723	12.0923
1.01467	1.09481	1.21917	1.07533	1.07015		1.95764	1.12754	1.06513	1.02885	1.51954		1.63944	1.55585	1.45772	1.56664	1.36071		4.24001	2.75947	8.55778	4.57894	2.59766		8.54159	9.56614	5.96026	6.25377	13.4272		8.58566	9.3795	8.9515	8.09134	12.4703
1.01985	1.09589	1.21178	1.11946	1.06731		2.00529	1.11456	1.05736	1.03478	1.52089		1.6475	1.53729	1.43756	1.54693	1.34989		4.19487	2.77879	8.51774	4.68228	2.55164		8.56411	9.60141	5.98455	6.25182	13.5808		8.27947	9.37224	9.10503	8.28566	12.51
1.0252	1.09597	1.21001	1.10927	1.06521		2.07894	1.11446	1.05593	1.02689	1.56103		1.6442	1.54767	1.43396	1.54398	1.33986		4.24852	2.62007	8.49224	4.71419	2.52147		8.50388	9.56575	6.03699	6.31338	13.4694		8.54204	9.38434	9.05223	8.32291	12.3835
1.02299	1.09647	1.21842	1.10586	1.06362		2.06895	1.12823	1.06632	1.03221	1.56145		1.64567	1.57118	1.44746	1.57306	1.36727		4.29554	2.62793	8.65396	4.72564	2.58458		8.5847	9.54943	6.09077	6.39343	13.4007		8.62446	9.37807	9.1166	8.21951	12.3806
1.01909	1.09626	1.21634	1.11952	1.06195		2.06034	1.12547	1.06182	1.02868	1.56778		1.65281	1.57789	1.43979	1.55926	1.37014		4.3076	2.79484	8.58204	4.76371	2.64101		8.61722	9.54507	6.16313	6.35931	13.4873		8.59424	9.39333	9.24654	8.21578	12.6433
1.01894	1.09712	1.22956	1.1145	1.05453		2.10513	1.12426	1.06207	1.02299	1.54654		1.65542	1.55489	1.43425	1.55532	1.37457		4.32828	2.62109	8.6895	4.76483	2.62387		8.57462	9.55509	6.22184	6.37894	13.567		8.58217	9.3917	9.06952	8.05421	12.0334
1.01897	1.09694	1.24072	1.14454	1.05851		2.19295	1.11021	1.0468	1.03152	1.51805		1.65134	1.58899	1.44056	1.55774	1.35194		4.32778	2.62062	8.66795	4.77018	2.62466		8.55778	9.53289	6.30493	6.46664	13.441		8.5697	9.40869	9.15248	8.20068	12.0835
1.01966	1.09737	1.2449	1.11928	1.06566		2.18388	1.10032	1.06297	1.0271	1.54324		1.66393	1.55586	1.45083	1.56619	1.38046		4.35797	2.67134	8.64907	4.75995	2.67028		8.51774	9.54496	6.35606	6.457	13.4671		8.51919	9.37207	8.92237	8.07204	12.204
1.02316	1.09714	1.22858	1.1459	1.05974		2.1744	1.11167	1.06772	1.02881	1.57565		1.65331	1.57649	1.47336	1.58991	1.38592		4.37674	2.7209	8.56708	4.77442	2.62518		8.49224	9.60639	6.39634	6.49662	13.4666		8.41182	9.37026	8.85351	8.42568	12.9662
1.02344	1.09889	1.22835	1.13039	1.0611		2.16465	1.11543	1.05843	1.03218	1.5239		1.65977	1.55378	1.46658	1.60256	1.36266		4.3933	2.6685	8.66745	4.78341	2.66289		8.65396	9.63446	6.45996	6.56703	13.4193		8.79798	9.35506	8.91375	8.3938	12.9361
1.02232	1.09716	1.22485	1.12283	1.06406		2.17287	1.10164	1.05929	1.03986	1.52948		1.66308	1.58435	1.46413	1.57528	1.35548		4.40001	2.44736	8.75974	4.75528	2.63837		8.58204	9.64632	6.49883	6.55503	13.5781		8.69413	9.36177	8.97014	8.36521	12.903
1.0255	1.09774	1.21851	1.11049	1.05755		2.15003	1.1191	1.06357	1.0385	1.51631		1.66174	1.56186	1.46094	1.58755	1.36736		4.4251	2.72187	8.62369	4.79205	2.67257		8.6895	9.61194	6.54947	6.57702	13.7566		8.6261	9.31774	8.96973	8.22532	12.8414
1.01949	1.09577	1.22453	1.14781	1.06139		2.17411	1.10812	1.06942	1.03931	1.53744		1.66651	1.56854	1.45097	1.56868	1.35812		4.43689	2.6887	8.57078	4.77204	2.67387		8.66795	9.62511	6.58463	6.66146	13.5199		8.63326	9.35565	8.80707	8.41723	12.9079
1.01474	1.09523	1.22112	1.11358	1.05959		2.16557	1.10404	1.05515	1.03809	1.53241		1.66473	1.59328	1.4472	1.58102	1.38192		4.46433	2.68998	8.80171	4.82969	2.70442		8.64907	9.6433	6.63104	6.67233	13.4352		8.52123	9.31913	8.85163	8.21745	12.9273
1.02434	1.09512	1.22087	1.12215	1.06191		2.14847	1.09572	1.06041	1.03737	1.56244		1.67107	1.57129	1.44389	1.55588	1.35879		4.49419	2.6236	8.62723	4.85257	2.71294		8.56708	9.64161	6.64932	6.68578	13.6085		8.45831	9.27711	9.07838	8.18676	12.6638
1.025	1.09473	1.22065	1.0999	1.05908		2.16312	1.10113	1.05927	1.03124	1.55052		1.66719	1.57478	1.45351	1.54601	1.3743		4.50776	2.74669	8.77527	4.85465	2.688		8.66745	9.65571	6.68116	6.74547	13.6491		8.5671	9.30535	8.92459	8.2427	12.7555
1.02825	1.09477	1.22204	1.15027	1.06073		2.1925	1.08592	1.05315	1.03199	1.56761		1.67387	1.57358	1.46851	1.57787	1.36484		4.53744	2.68085	8.81343	4.85515	2.59866		8.75974	9.65136	6.71984	6.78282	13.5488		8.75743	9.31735	8.95073	8.1614	12.6647
1.01912	1.09604	1.21845	1.12094	1.05884		2.20783	1.07931	1.04928	1.02845	1.54089		1.67458	1.59633	1.48358	1.6086	1.36889		4.56179	2.62829	8.68892	4.85409	2.6726		8.62369	9.64696	6.76202	6.80275	13.6874		8.60786	9.32503	9.17307	8.08998	12.741
1.02152	1.09747	1.21376	1.1263	1.05592		2.22285	1.08783	1.0519	1.03808	1.56245		1.6783	1.59896	1.46513	1.58744	1.37535		4.5282	2.78089	8.61799	4.85523	2.66982		8.57078	9.63977	6.80185	6.87453	13.6323		8.61004	9.32209	9.06417	8.24133	12.6842
1.02105	1.09591	1.21446	1.08595	1.05479		2.25117	1.11173	1.04918	1.02833	1.54853		1.68244	1.56599	1.48747	1.58737	1.38096		4.57806	2.609	8.70774	4.83238	2.65021		8.80171	9.63502	6.85442	6.89169	13.5901		8.40112	9.33176	8.94653	8.18759	12.9696
1.02454	1.09518	1.21074	1.13586	1.06286		2.30008	1.10558	1.05078	1.03499	1.60727		1.6792	1.56073	1.51013	1.59272	1.37157		4.60799	2.68617	8.66824	4.79761	2.67393		8.62723	9.65053	6.904	6.89567	13.6325		8.60497	9.26517	9.27634	8.28783	13.1073
1.01567	1.09561	1.21996	1.0883	1.05217		2.23696	1.1109	1.04962	1.02952	1.61247		1.68831	1.5822	1.49032	1.59398	1.35744		4.57696	2.89844	8.78188	4.80596	2.70674		8.77527	9.611	6.92368	7.01249	13.744		8.65963	9.27448	9.27103	8.25153	12.8107
1.01675	1.09569	1.22148	1.12268	1.05572		2.21197	1.12712	1.03998	1.01836	1.62071		1.70235	1.57008	1.49405	1.59561	1.35806		4.58994	2.67905	8.85831	4.78854	2.65479		8.81343	9.55902	6.98024	7.01163	13.7585		8.54457	9.28148	8.99912	8.10511	12.8167
1.02713	1.09628	1.2192	1.13214	1.05889		2.21153	1.12217	1.04802	1.03563	1.58251		1.70073	1.57442	1.47084	1.61948	1.36531		4.61326	2.67822	8.80919	4.79604	2.74103		8.68892	9.57771	7.00534	7.03624	13.759		8.3855	9.26246	9.24802	8.12096	12.9178
1.01593	1.09584	1.2255	1.13238	1.05934		2.18273	1.1078	1.04771	1.02671	1.56312		1.69129	1.57628	1.45679	1.59776	1.36204		4.67432	2.68555	8.71274	4.81988	2.7832		8.61799	9.58424	7.05741	7.05227	13.7247		8.48228	9.26723	9.095	8.32986	12.8923
1.02512	1.09469	1.23214	1.08181	1.05836		2.18844	1.10234	1.04093	1.03362	1.56169		1.70013	1.58665	1.44443	1.61583	1.35888		4.68483	2.59288	8.70292	4.82834	2.72473		8.70774	9.56651	7.10613	7.04998	13.8839		8.56395	9.27295	9.25809	8.11687	13.1936
1.02007	1.09537	1.22541	1.11622	1.05631		2.17441	1.09117	1.04871	1.02376	1.5427		1.70462	1.57133	1.46372	1.6264	1.36383		4.69329	2.71447	8.67549	4.81156	2.77449		8.66824	9.58028	7.10741	7.06712	13.9255		8.47287	9.25361	9.29783	8.19169	13.1259
1.02071	1.09642	1.23007	1.10287	1.06237		2.16498	1.09652	1.04801	1.02492	1.56858		1.70209	1.5922	1.45712	1.59444	1.38277		4.70022	2.6233	8.76079	4.83029	2.73739		8.78188	9.54836	7.13329	7.10238	13.8698		8.71292	9.28392	9.13051	8.26879	13.0223
1.02756	1.09582	1.22221	1.11568	1.0626		2.14313	1.10173	1.05108	1.03483	1.6134		1.70387	1.60437	1.46633	1.62995	1.38355		4.73933	2.74743	8.77195	4.81539	2.73232		8.85831	9.48655	7.15508	7.15636	13.6975		8.45197	9.2736	9.20412	7.98503	13.2592
1.01786	1.09524	1.22751	1.10655	1.05797		2.17007	1.09404	1.0535	1.04325	1.61366		1.70067	1.61383	1.45261	1.60274	1.37721		4.76047	2.58019	8.77069	4.84573	2.79059		8.80919	9.51631	7.16417	7.16643	13.7565		8.3412	9.25938	8.91054	8.17469	13.0935
1.01853	1.09539	1.21965	1.0969	1.05348		2.10345	1.10719	1.05527	1.02804	1.61766		1.70155	1.5932	1.46251	1.63812	1.35645		4.73762	2.66214	8.58993	4.83699	2.76036		8.71274	9.50585	7.19663	7.20674	13.793		8.43694	9.25046	9.03679	8.13121	13.1099
1.02422	1.09475	1.22731	1.14508	1.06193		2.12403	1.09036	1.05149	1.02466	1.61289		1.7117	1.59852	1.46426	1.64366	1.37831		4.80458	2.59178	8.7623	4.82486	2.81984		8.70292	9.48594	7.24635	7.25912	13.8239		8.46091	9.19899	9.12973	8.12842	13.1171
1.01682	1.09417	1.22501	1.12888	1.05608		2.12	1.08836	1.04759	1.03361	1.5821		1.71025	1.59186	1.48207	1.6315	1.36128		4.7903	2.61768	8.54586	4.85372	2.83548		8.67549	9.52666	7.25436	7.27956	13.8367		8.51087	9.24636	8.7823	8.20635	13.155
1.02232	1.09535	1.22189	1.11307	1.04952		2.17548	1.10315	1.03096	1.03365	1.6098		1.72004	1.59156	1.48165	1.6442	1.36126		4.84081	2.64011	8.67965	4.81039	2.83921		8.76079	9.53429	7.27968	7.31674	13.8318		8.46705	9.2493	8.85936	8.22591	13.0912
1.0165	1.09292	1.22778	1.11006	1.04935		2.18508	1.08883	1.0381	1.03506	1.62403		1.72371	1.57713	1.4775	1.64521	1.3638		4.85494	2.73234	8.6402	4.81768	2.8199		8.77195	9.57408	7.3087	7.33818	13.7278		8.56208	9.20382	9.06755	8.29766	13.3936
1.01513	1.09508	1.23015	1.10278	1.05325		2.19944	1.07773	1.03676	1.03317	1.6301		1.7234	1.59612	1.4818	1.66465	1.37244		4.85233	2.56929	8.73144	4.87258	2.78995		8.77069	9.62929	7.34297	7.4146	13.6934		8.33148	9.2253	9.19755	8.16987	13.269
1.01958	1.09383	1.22714	1.14942	1.05282		2.1652	1.07448	1.0427	1.02441	1.62248		1.72886	1.61229	1.51809	1.64613	1.36893		4.88791	2.80042	8.80319	4.93067	2.89433		8.58993	9.6814	7.35121	7.49618	13.6842		8.53464	9.18969	9.16437	8.1317	13.2666
1.02077	1.09417	1.23665	1.13196	1.04839		2.16262	1.08375	1.03254	1.03429	1.60403		1.73627	1.61669	1.55615	1.65414	1.37943		4.88019	2.71147	8.74716	4.92626	2.8703		8.7623	9.70695	7.37917	7.45098	13.7988		8.41349	9.19735	9.20264	8.11615	13.2729
1.01387	1.09355	1.22794	1.09301	1.04771		2.17085	1.07792	1.04212	1.03489	1.59169		1.73578	1.63792	1.5773	1.64444	1.37408		4.91516	2.75207	8.83674	4.85803	2.8352		8.54586	9.74543	7.4281	7.5463	13.6963		8.37977	9.20272	9.20637	8.11557	13.3481
1.02281	1.09313	1.22671	1.09413	1.04895		2.17141	1.08002	1.03369	1.02462	1.61167		1.74088	1.64188	1.6046	1.63331	1.36886		4.9	2.56718	8.74544	4.89879	2.87466		8.67965	9.80594	7.45526	7.60173	13.811		8.47701	9.19432	9.48063	8.05804	13.3385
1.02229	1.0959	1.2396	1.11354	1.04728		2.20533	1.09184	1.03778	1.02042	1.64552		1.74373	1.60931	1.59828	1.63485	1.38856		4.95142	2.71353	8.70851	4.90891	2.87852		8.6402	9.75742	7.48232	7.65966	13.7584		8.46534	9.17847	9.66638	8.26174	13.2045
1.02668	1.09118	1.25533	1.10237	1.05042		2.18786	1.09825	1.04173	1.02314	1.59101		1.74008	1.61778	1.57512	1.62777	1.37814		4.96488	2.71567	8.85663	4.91106	2.82481		8.73144	9.75997	7.52905	7.72271	13.6468		8.62709	9.20028	9.49322	8.00385	13.2761
1.05218	1.09181	1.25814	1.1097	1.04689		2.16785	1.0856	1.03778	1.03371	1.62659		1.73622	1.62055	1.56644	1.66493	1.38779		4.98136	2.71638	8.79444	4.92682	2.83025		8.80319	9.75226	7.54549	7.78371	13.8206		8.44954	9.17722	9.34835	8.13292	13.1794
1.04476	1.09403	1.26822	1.12213	1.0459		2.14999	1.08582	1.03801	1.03315	1.61888		1.73953	1.61904	1.55831	1.65819	1.43067		4.99201	2.67079	8.87033	4.89373	2.87109		8.74716	9.67388	7.58942	7.85668	13.8795		8.25	9.19445	9.62914	8.21706	13.1047
1.03951	1.09275	1.2572	1.12438	1.04357		2.17149	1.07821	1.03825	1.02471	1.55742		1.74398	1.62522	1.54651	1.65248	1.39911		4.98878	2.72389	8.84074	4.95853	2.86103		8.83674	9.62621	7.64025	7.84986	13.9341		8.24627	9.19441	9.40249	8.10432	13.3371
1.03707	1.09304	1.25443	1.14035	1.05457		2.12231	1.08065	1.03572	1.02779	1.58575		1.74863	1.61013	1.56313	1.65486	1.41694		5.00816	2.7754	8.81278	4.97145	2.83067		8.74544	9.62396	7.65751	7.93471	13.9717		8.34913	9.18787	9.37976	8.02444	13.2631
1.02931	1.09169	1.25516	1.12043	1.04377		2.14542	1.08297	1.03366	1.02719	1.59106		1.75229	1.62033	1.56184	1.66409	1.39606		5.04366	2.81708	8.81338	4.97226	2.86789		8.70851	9.5783	7.70596	7.96293	14.0981		8.49859	9.18401	9.42215	8.10624	13.3139
1.02979	1.09228	1.24571	1.13133	1.04424		2.13517	1.07894	1.04001	1.01937	1.67864		1.74718	1.62992	1.53969	1.66564	1.39148		5.0627	2.74027	8.80072	4.94716	2.91578		8.85663	9.57145	7.75365	7.96173	14.0396		8.51276	9.13368	9.59481	8.17936	13.4071
1.03236	1.09235	1.2504	1.12749	1.05046		2.18342	1.071	1.02973	1.03732	1.67203		1.74359	1.62817	1.54286	1.67697	1.42646		5.08509	2.62946	8.71353	4.94754	2.87154		8.79444	9.56178	7.76619	7.98352	14.1209		8.42868	9.12789	9.25991	8.19793	13.4944
1.03488	1.09358	1.26354	1.10047	1.04792		2.17256	1.09804	1.02787	1.03431	1.64351		1.75915	1.63769	1.53912	1.6972	1.42815		5.0961	2.79617	8.70849	4.93114	2.9526		8.87033	9.56909	7.82726	8.02294	14.1555		8.47083	9.15612	9.32922	8.13117	13.5167
1.01652	1.09367	1.28622	1.10144	1.04645		2.18087	1.10726	1.03006	1.02591	1.63029		1.74656	1.62009	1.5289	1.70036	1.41755		5.13324	2.63296	8.82077	4.915	2.88999		8.84074	9.56117	7.88961	8.00913	14.1169		8.26228	9.13427	9.51241	7.90269	13.3075
1.0154	1.09278	1.30672	1.0883	1.0497		2.14802	1.08396	1.04144	1.02713	1.64192		1.74634	1.62309	1.53261	1.67831	1.40567		5.16217	2.62329	8.67792	4.91467	2.96415		8.81278	9.56481	7.89415	8.07789	13.9501		8.53184	9.13841	9.36984	8.19993	13.3177
1.02127	1.09282	1.31502	1.10654	1.03908		2.20453	1.07871	1.0357	1.02857	1.63275		1.74705	1.63674	1.55078	1.68168	1.40052		5.14719	2.6375	8.76971	4.93716	2.90246		8.81338	9.56784	7.93893	8.11937	13.8902		8.30215	9.12938	9.51043	8.18764	13.3925
1.02532	1.09202	1.34474	1.10781	1.04953		2.15124	1.08416	1.02813	1.02737	1.63701		1.74513	1.62414	1.54236	1.67884	1.41312		5.15395	2.58835	8.74748	4.96205	2.96943		8.80072	9.57252	7.99529	8.0716	13.8769		8.38318	9.1333	9.55992	7.85206	13.4322
1.02295	1.09365	1.33428	1.10947	1.04771		2.13117	1.0824	1.03426	1.03429	1.67571		1.74426	1.6234	1.55292	1.69864	1.41621		5.17531	2.60152	8.8824	4.95922	2.94782		8.71353	9.59677	8.01149	8.10701	14.0249		8.57587	9.13961	9.2658	7.92519	13.608
1.00765	1.09201	1.35505	1.10188	1.04292		2.12724	1.08208	1.02225	1.03275	1.72487		1.74358	1.62838	1.54585	1.71251	1.39033		5.17457	2.69969	8.67944	4.96833	2.96274		8.70849	9.57907	8.04373	8.21676	14.0743		8.56044	9.13462	9.33758	8.13247	13.7367
1.01451	1.09279	1.35729	1.11996	1.04505		2.19063	1.07551	1.03192	1.03478	1.69783		1.75741	1.66187	1.53863	1.70254	1.39623		5.18656	2.5812	8.71185	4.93771	2.95525		8.82077	9.5797	8.06126	8.20847	13.9686		8.31236	9.15495	9.5204	8.14952	13.3734
1.0187	1.09332	1.35935	1.13452	1.04599		2.18959	1.08869	1.0333	1.03578	1.68184		1.75106	1.6095	1.56174	1.71076	1.40334		5.24624	2.71581	8.73166	4.9821	2.92812		8.67792	9.61389	8.06737	8.21909	13.8445		8.46603	9.14761	9.64156	8.14395	13.1749
1.02381	1.09207	1.35492	1.11133	1.04513		2.23161	1.08806	1.03166	1.0373	1.64233		1.75432	1.63626	1.53745	1.6711	1.40038		5.23782	2.66931	8.66357	4.95847	2.93051		8.76971	9.60319	8.1017	8.28273	14.0074		8.58442	9.12578	9.47342	7.93957	13.5502
1.01465	1.08964	1.36493	1.11595	1.04516		2.18503	1.09634	1.02241	1.02509	1.59449		1.75537	1.65152	1.5424	1.69568	1.4442		5.24674	2.55206	8.64656	4.9634	2.92307		8.74748	9.64923	8.11173	8.32783	13.8011		8.3772	9.10077	9.6227	8.07744	13.6572
1.02443	1.09038	1.35915	1.13613	1.04915		2.3068	1.13766	1.02511	1.0329	1.61661		1.76057	1.65842	1.54728	1.70795	1.42772		5.25022	2.52731	8.68325	4.96263	2.99102		8.8824	9.66611	8.14698	8.34814	13.7955		8.39312	9.06294	9.49193	8.17865	13.503
1.02107	1.09398	1.34407	1.1287	1.05684		2.29546	1.11992	1.02875	1.02975	1.59328		1.76022	1.6419	1.5572	1.71401	1.43205		5.31221	2.64734	8.63662	4.93864	2.97075		8.67944	9.68042	8.16116	8.41682	13.762		8.45728	9.07963	9.45404	7.96488	13.3285
1.02898	1.09452	1.35987	1.11269	1.05502		2.28022	1.1045	1.02283	1.01864	1.58471		1.76403	1.64568	1.58443	1.73412	1.40449		5.30944	2.7428	8.74732	4.99627	2.9776		8.71185	9.73823	8.16965	8.4351	13.953		8.26028	9.08623	9.32357	8.14493	13.5166
1.01954	1.09305	1.3589	1.11243	1.05698		2.31938	1.1137	1.02723	1.02748	1.65598		1.76656	1.66285	1.56892	1.72631	1.40972		5.33084	2.67168	8.65553	5.01758	2.98864		8.73166	9.75039	8.21395	8.44094	13.7757		8.30544	9.09351	9.59346	7.96616	13.5673
1.00761	1.09187	1.35865	1.10436	1.05158		2.26172	1.12057	1.02854	1.02877	1.6099		1.77167	1.65532	1.58329	1.70422	1.42309		5.33307	2.69113	8.72688	5.02684	2.97445		8.66357	9.77795	8.23849	8.48661	14.0365		8.16994	9.08319	9.49659	8.11228	13.6149
1.0193	1.09295	1.36593	1.15275	1.05109		2.2566	1.11105	1.02995	1.03326	1.64279		1.75848	1.66155	1.62999	1.73201	1.45394		5.3199	2.7125	8.66598	5.02126	3.0392		8.64656	9.74585	8.29072	8.4631	13.9538		8.30056	9.08478	9.346	8.16086	13.5865
1.0223	1.09228	1.37068	1.1205	1.05271		2.2383	1.10052	1.02441	1.03758	1.65344		1.76735	1.68025	1.61759	1.7517	1.4449		5.39009	2.73713	8.7064	5.01588	3.00862		8.68325	9.73845	8.30826	8.49476	13.9718		8.60866	9.08039	9.56413	7.90665	13.6396
1.0251	1.09082	1.37174	1.10222	1.0516		2.26338	1.09937	1.02751	1.03679	1.65033		1.76162	1.68792	1.63101	1.72839	1.42453		5.3665	2.79356	8.59354	5.0499	3.0356		8.63662	9.71828	8.35347	8.52043	14.0768		8.41299	9.07478	9.36383	7.84503	13.2005
1.02528	1.09116	1.36936	1.09192	1.04862		2.24741	1.11304	1.03558	1.02582	1.63609		1.75901	1.66699	1.62902	1.71514	1.43662		5.40983	2.54774	8.52054	5.03594	2.983		8.74732	9.66394	8.38976	8.54119	13.9912		8.24884	9.10329	9.4255	7.91439	13.7109
1.02261	1.08766	1.37625	1.05455	1.04541		2.23937	1.11077	1.02993	1.02011	1.6848		1.76083	1.68359	1.6309	1.73096	1.41623		5.40345	2.49873	8.5868	4.97092	3.00294		8.65553	9.60785	8.45704	8.59639	14.1898		8.27971	9.09688	9.42709	8.09957	13.4864
1.01824	1.08945	1.3704	1.11149	1.05272		2.22632	1.093	1.02864	1.03288	1.69167		1.77185	1.67062	1.64492	1.71643	1.42558		5.40764	2.64244	8.52254	4.95208	3.01792		8.72688	9.52791	8.50066	8.63605	14.1324		8.51617	9.09796	9.57844	8.1031	13.3247
1.0188	1.08984	1.37352	1.12836	1.04323		2.26038	1.09045	1.03264	1.02803	1.67789		1.77206	1.67155	1.61198	1.71705	1.41646		5.40168	2.58524	8.51969	4.97468	2.98036		8.66598	9.5001	8.54802	8.67657	14.1046		8.35059	9.05527	9.31534	7.7786	13.7605
1.02724	1.09032	1.37584	1.07782	1.05379		2.22111	1.09559	1.04034	1.02787	1.66369		1.77946	1.67538	1.59003	1.72184	1.45659		5.4589	2.69828	8.56648	5.01456	2.9842		8.7064	9.47594	8.58161	8.61725	14.2061		8.51046	9.07671	9.44622	8.02959	13.6092
1.02957	1.08908	1.39349	1.10919	1.04584		2.24214	1.09917	1.0335	1.02766	1.68152		1.77871	1.67597	1.62353	1.70954	1.45022		5.46396	2.70271	8.427	4.99976	3.00172		8.59354	9.46906	8.61761	8.6154	14.169		8.20168	9.08726	9.51239	7.97318	13.7339
1.0185	1.09051	1.39418	1.09144	1.04675		2.31624	1.09837	1.03535	1.02902	1.68817		1.78838	1.67854	1.62487	1.71254	1.44619		5.44521	2.69937	8.58136	4.99561	2.95476		8.52054	9.45816	8.59803	8.63572	14.0899		8.42127	9.0065	9.60436	7.85941	13.6385
1.02391	1.08926	1.38624	1.09388	1.05055		2.34585	1.10114	1.02786	1.03801	1.80446		1.77751	1.6778	1.59062	1.72844	1.43664		5.48723	2.67485	8.58828	5.00266	2.94028		8.5868	9.46679	8.63378	8.63888	14.1101		8.17329	9.03746	9.42874	8.266	13.564
1.02369	1.08958	1.37842	1.1047	1.05142		2.28587	1.09043	1.03246	1.02512	1.99832		1.79083	1.69024	1.59166	1.72727	1.44045		5.52027	2.72938	8.6133	4.99776	2.97068		8.52254	9.45502	8.66148	8.51194	14.244		8.65232	9.04662	9.49921	8.01763	13.5533
1.0196	1.08925	1.38576	1.08398	1.04648		2.29634	1.10294	1.02423	1.02683	1.93485		1.79151	1.69465	1.58122	1.7614	1.42964		5.50571	2.76048	8.621	5.01666	3.03691		8.51969	9.47747	8.69977	8.66947	13.9791		8.34752	9.01703	9.52166	8.00151	13.4824
1.02057	1.08839	1.39624	1.10756	1.04706		2.27006	1.1114	1.03337	1.02672	1.86344		1.81082	1.70156	1.57021	1.74779	1.42458		5.54354	2.63796	8.72186	4.99912	3.00183		8.56648	9.48687	8.72461	8.66836	14.1095		8.21367	9.02954	9.2925	8.16707	13.5136
1.02609	1.08763	1.39001	1.11813	1.04057		2.20139	1.10906	1.04263	1.03848	1.83976		1.81588	1.70179	1.55674	1.7304	1.4408		5.56547	2.59082	8.53945	5.0334	3.07289		8.427	9.48201	8.76539	8.63775	14.0714		8.31351	8.9856	9.26355	7.97371	13.4893
1.02012	1.08918	1.38341	1.08494	1.04286		2.25641	1.11346	1.02449	1.0393	1.82345		1.818	1.7292	1.55831	1.75512	1.44384		5.56329	2.90751	8.60702	5.01787	3.04937		8.58136	9.51135	8.75136	8.64235	14.0444		8.22083	9.00924	9.63408	8.00402	13.7071
1.01639	1.0899	1.38672	1.08306	1.05076		2.31251	1.10014	1.03953	1.02918	1.79395		1.82505	1.69828	1.55502	1.73722	1.42391		5.57734	2.61327	8.40125	5.03749	3.033		8.58828	9.55077	8.71736	8.73952	14.0584		8.14605	9.01501	9.60317	7.967	13.6608
1.02418	1.09	1.39149	1.1239	1.04799		2.29166	1.07791	1.04718	1.02612	1.76533		1.82956	1.70009	1.56302	1.78171	1.44315		5.60528	2.59186	8.54855	5.00383	3.02246		8.6133	9.51978	8.77023	8.66766	13.9109		8.24402	8.99188	9.2998	7.92227	13.3943
1.01897	1.08949	1.38602	1.08049	1.04143		2.30603	1.0854	1.04159	1.04021	1.74662		1.84019	1.69437	1.55472	1.75709	1.43794		5.60301	2.55017	8.5418	5.03564	3.03743		8.621	9.52402	8.80945	8.68879	14.0332		8.28976	8.97612	9.58468	7.71694	13.5641
1.02023	1.08915	1.37725	1.05674	1.04266		2.21286	1.08393	1.04663	1.02895	1.71487		1.84755	1.70784	1.54654	1.74341	1.42872		5.64784	2.62155	8.63875	5.08854	3.07802		8.72186	9.59885	8.76516	8.74699	13.9039		8.11701	8.9724	9.62574	8.07585	13.6436
1.01021	1.08937	1.37857	1.09845	1.04985		2.25022	1.08146	1.04512	1.03176	1.68372		1.84254	1.7047	1.54231	1.77352	1.43038		5.60293	2.64653	8.61513	5.05464	3.08393		8.53945	9.60389	8.77469	8.73794	13.9956		8.23634	8.97665	9.40615	7.84516	13.45
1.02446	1.08975	1.37857	1.10523	1.04783		2.26305	1.09	1.05032	1.02772	1.66942		1.85627	1.71237	1.53906	1.7453	1.4478		5.67209	2.58288	8.70629	5.0872	3.12634		8.60702	9.58662	8.77254	8.70756	13.8459		8.28561	8.97582	9.49688	8.06543	13.5469
1.01435	1.08729	1.37156	1.08712	1.04534		2.25521	1.10176	1.04373	1.02276	1.6611		1.85682	1.70085	1.50439	1.75874	1.4488		5.66738	2.7191	8.77871	5.05997	3.17607		8.40125	9.60997	8.80754	8.75654	14.0005		8.37195	8.96152	9.32846	7.93012	13.6676
1.01861	1.08674	1.36554	1.06885	1.04827		2.2462	1.0895	1.0514	1.02477	1.68289		1.86066	1.71921	1.51627	1.78019	1.45014		5.6746	2.60904	8.49399	5.03311	3.11228		8.54855	9.64524	8.78831	8.80443	14.0086		8.13184	8.9696	9.75399	8.06307	13.4738
1.02013	1.08687	1.36491	1.07617	1.05296		2.34017	1.09302	1.04699	1.03113	1.67213		1.86909	1.71384	1.52613	1.76561	1.45612		5.72878	2.70793	8.57254	5.03834	3.16664		8.5418	9.6193	8.79825	8.74506	14.0176		8.08574	8.99191	9.44974	7.99038	13.6301
1.01107	1.08855	1.36979	1.10641	1.04456		2.341	1.08595	1.04934	1.02034	1.6674		1.87106	1.72949	1.53024	1.75216	1.44262		5.70674	2.46977	8.49171	5.04822	3.23639		8.63875	9.62926	8.83272	8.81949	13.9722		8.11244	8.9755	9.55733	7.98675	13.6684
1.02067	1.09012	1.36013	1.11409	1.04396		2.36573	1.10556	1.04526	1.03107	1.683		1.86587	1.71834	1.5825	1.77517	1.46187		5.73472	2.63335	8.4695	5.02516	3.1799		8.61513	9.64638	8.81009	8.87816	14.1246		8.15062	8.97636	9.40914	8.06904	13.324
1.01029	1.08637	1.35988	1.11657	1.04704		2.3688	1.09908	1.04569	1.03223	1.67465		1.87	1.73442	1.60182	1.78709	1.43895		5.7315	2.71489	8.66642	4.7801	3.26655		8.70629	9.62815	8.8627	8.8963	14.0366		8.51717	8.99109	9.49494	7.96279	13.8514
1.0272	1.08948	1.34371	1.11929	1.04503		2.35405	1.09567	1.04318	1.03245	1.76648		1.87452	1.73663	1.62315	1.77919	1.43236		5.74028	2.61996	8.54037	4.47926	3.29365		8.77871	9.60325	8.85279	8.96562	14.2728		8.33211	8.96001	9.3337	7.69112	13.6268
1.0261	1.08874	1.34201	1.10593	1.04984		2.40034	1.09719	1.04381	1.03266	1.75692		1.87064	1.7343	1.68514	1.79443	1.43098		5.76289	2.74927	8.60859	4.49696	3.32569		8.49399	9.61267	8.87355	8.94891	14.3379		8.15975	8.97846	9.38214	7.90839	13.8345
1.02288	1.08767	1.34962	1.07864	1.04466		2.38032	1.09602	1.0543	1.02977	1.73687		1.87298	1.72985	1.70206	1.78292	1.44542		5.77311	2.72899	8.81499	4.51834	3.24784		8.57254	9.56623	8.86717	8.89587	14.1646		8.32718	8.99234	9.39138	7.79697	13.6745
1.01956	1.08621	1.33862	1.09979	1.04867		2.33218	1.10069	1.04808	1.02847	1.72194		1.86485	1.72822	1.67557	1.78526	1.43934		5.77628	2.61513	8.65081	4.74996	3.33023		8.49171	9.5755	8.87846	9.04607	14.3174		8.16002	8.98561	9.24027	8.02609	13.7837
1.0263	1.08844	1.34202	1.09674	1.04526		2.33412	1.10248	1.04476	1.03887	1.72671		1.86597	1.73645	1.67886	1.78515	1.46999		5.79373	2.75259	8.64628	4.548	3.34491		8.4695	9.59348	8.90948	9.14485	14.3107		8.35678	8.96712	9.32663	8.01918	13.5888
1.0194	1.08545	1.32824	1.08936	1.05766		2.39485	1.09285	1.05666	1.03785	1.71005		1.8757	1.74346	1.67421	1.78694	1.44537		5.80949	2.75994	8.65185	4.42225	3.34853		8.66642	9.4958	8.9123	8.9858	14.1913		8.31668	8.98374	9.26955	8.00926	13.6263
1.02132	1.08737	1.3339	1.06544	1.05638		2.38759	1.08237	1.05056	1.03556	1.69033		1.86742	1.74861	1.68042	1.7703	1.44024		5.85087	2.72385	8.65717	4.65365	3.38835		8.54037	9.49969	8.93658	9.05876	14.2074		8.46345	9.01004	9.18229	7.85276	13.7294
1.01644	1.0886	1.3256	1.08499	1.05059		2.37345	1.08289	1.05258	1.03049	1.73027		1.86592	1.76217	1.68546	1.80038	1.45079		5.83221	2.67473	8.76913	4.43565	3.42798		8.60859	9.44176	8.90859	9.2018	14.2137		8.22755	8.97537	9.24701	8.10605	13.8655
1.01721	1.09084	1.32805	1.11069	1.0514		2.38254	1.0875	1.04974	1.02904	1.7379		1.87214	1.74815	1.67166	1.79713	1.45766		5.84033	2.7315	8.74534	4.70938	3.42961		8.81499	9.37705	8.9166	9.00778	14.2192		8.14413	8.97373	9.43302	7.85211	13.8482
1.01173	1.08846	1.32489	1.10478	1.05428		2.36963	1.07753	1.0592	1.0407	1.77784		1.87542	1.73795	1.65174	1.79991	1.43102		5.85247	2.80994	8.60464	4.57339	3.33557		8.65081	9.39301	8.94163	9.00325	14.1936		8.41036	9.0032	9.45672	8.09121	13.7813
1.01784	1.08887	1.33327	1.06174	1.05337		2.3901	1.08359	1.0576	1.03225	1.79955		1.88047	1.73186	1.67002	1.80131	1.45561		5.86953	2.788	8.63611	4.55223	3.41796		8.64628	9.40006	9.09545	9.18511	14.1274		8.32787	9.0033	9.37467	8.22649	13.5656
1.02356	1.08888	1.3196	1.11434	1.05558		2.3703	1.09481	1.05816	1.02259	1.81813		1.8774	1.76179	1.64715	1.80487	1.43451		5.89633	2.58691	8.6325	4.53083	3.41894		8.65185	9.3827	8.97901	9.09579	14.0661		8.35032	8.97626	9.70086	8.1269	13.4269
1.02344	1.08713	1.32804	1.09913	1.05141		2.34048	1.0813	1.04711	1.02972	1.79773		1.87838	1.75469	1.6361	1.81564	1.42609		5.89774	2.76712	8.63543	4.52428	3.49503		8.65717	9.37298	9.16768	9.04249	14.0107		8.4286	8.95766	9.56348	7.79925	13.2963
1.0204	1.08976	1.31715	1.11636	1.05278		2.40157	1.0924	1.05591	1.03242	1.78089		1.87761	1.74567	1.62684	1.81308	1.44278		5.88811	2.72484	8.61707	4.50716	3.41464		8.76913	9.4186	8.99111	9.22938	13.9874		8.07693	8.97144	9.3938	8.08695	13.3623
1.01235	1.08876	1.31493	1.06702	1.05073		2.40424	1.09154	1.05793	1.03203	1.74467		1.88487	1.75494	1.61214	1.8175	1.46157		5.91179	2.6025	8.73295	4.54069	3.41426		8.74534	9.41131	9.15672	9.21081	14.0582		8.12732	8.96463	9.3429	7.84931	13.4055
1.01978	1.08726	1.30728	1.12256	1.05181		2.38309	1.08671	1.06378	1.03194	1.74812		1.88883	1.76107	1.59874	1.8038	1.46111		5.9538	2.65751	8.73909	4.468	3.45887		8.60464	9.39615	8.99642	9.0556	13.9413		8.18856	8.96708	9.57887	7.85302	13.6079
1.02811	1.08662	1.3088	1.1089	1.04941		2.37776	1.09858	1.05486	1.03278	1.74926		1.89118	1.7355	1.60512	1.82499	1.42722		5.95742	2.67335	8.82819	4.36205	3.48145		8.63611	9.44176	9.20696	9.19107	13.9184		8.14926	8.95334	9.31942	8.04184	13.6624
1.01741	1.08592	1.31006	1.11543	1.05178		2.43257	1.09168	1.05661	1.03394	1.73038		1.88685	1.78236	1.60212	1.83211	1.48766		5.94497	2.75562	8.64463	4.47668	3.49696		8.6325	9.42311	8.99725	9.17255	13.9834		8.00888	8.96514	9.40399	7.76707	13.1545
1.02209	1.08649	1.30832	1.06445	1.04792		2.45458	1.09363	1.0452	1.0331	1.71971		1.89016	1.77642	1.60033	1.8218	1.48593		5.97363	2.6083	8.65976	4.38697	3.40315		8.63543	9.45705	9.24725	9.10176	14.0323		8.14098	8.96086	9.30764	7.99519	13.5878
1.01801	1.08628	1.31808	1.0875	1.04977		2.45942	1.09066	1.05583	1.02362	1.73976		1.88996	1.75571	1.5983	1.84651	1.50011		5.9741	2.62165	8.71537	4.53394	3.51721		8.61707	9.48887	9.04673	9.12606	13.9353		8.34748	8.98506	9.14072	7.99986	13.6082
1.02364	1.08656	1.3029	1.12975	1.05733		2.44798	1.10233	1.05932	1.04021	1.74699		1.89461	1.77512	1.59654	1.86292	1.48389		5.98093	2.65165	8.62587	4.50578	3.52367		8.73295	9.46902	9.22664	9.1581	14.0263		8.18412	8.98879	9.22655	7.9011	13.8982
1.01767	1.08591	1.29785	1.11121	1.05806		2.46808	1.08913	1.06815	1.03035	1.77313		1.89674	1.76304	1.59477	1.87277	1.45951		5.99654	2.59523	8.77828	4.42352	3.51144		8.73909	9.39671	9.05907	9.13571	14.0427		8.18147	8.9848	9.22747	7.93478	13.9157
1.0246	1.08544	1.29308	1.13083	1.06154		2.42408	1.07815	1.05913	1.04141	1.75431		1.90423	1.76787	1.60161	1.83888	1.46597		6.01241	2.8328	8.76234	4.52618	3.44854		8.82819	9.47296	9.26129	9.13614	14.0637		8.4061	8.97863	8.98233	7.74088	13.8414
1.01912	1.08319	1.29338	1.1079	1.06301		2.4238	1.0776	1.06204	1.0419	1.78034		1.89944	1.7579	1.59367	1.823	1.46934		6.03072	2.74983	8.7117	4.55191	3.53236		8.64463	9.47854	9.04769	9.19236	14.1109		8.14281	8.98181	9.24422	7.85992	14.0283
1.02065	1.08687	1.28608	1.09531	1.05671		2.46787	1.10299	1.05782	1.04063	1.74327		1.89819	1.77465	1.57929	1.85262	1.48012		6.05252	2.69299	8.84353	4.59453	3.51513		8.65976	9.47099	9.23344	9.19823	14.0555		8.17699	8.96647	9.08639	7.84715	13.8799
1.01248	1.08534	1.28487	1.0986	1.05809		2.48845	1.09047	1.05718	1.03356	1.73623		1.89928	1.79742	1.57281	1.86969	1.46511		6.03519	2.64411	8.72941	4.33612	3.53988		8.71537	9.47201	9.04952	9.37798	14.0771		8.25426	8.96656	9.19071	8.06422	13.5645
1.01951	1.08502	1.28043	1.12109	1.06161		2.49002	1.07691	1.07377	1.02717	1.71851		1.90205	1.78554	1.57827	1.86283	1.46138		6.06292	2.70295	8.72509	4.52588	3.64234		8.62587	9.45808	9.22116	9.40844	13.9789		8.38925	8.92289	9.34078	7.77477	13.6885
1.02294	1.08391	1.29016	1.09539	1.05468		2.50434	1.07664	1.06583	1.02827	1.74285		1.91779	1.78067	1.58374	1.88844	1.48091		6.04584	2.68858	8.74762	4.64315	3.61295		8.77828	9.41726	9.03666	9.37015	13.9369		8.23763	8.95976	9.07959	7.65088	13.4767
1.02152	1.08478	1.28076	1.08768	1.05036		2.44818	1.08311	1.05814	1.02979	1.76813		1.92278	1.76417	1.58692	1.87771	1.46969		6.04784	2.90926	8.80346	4.5151	3.63022		8.76234	9.45026	9.2536	9.34506	14.0398		8.47	8.98936	9.40649	8.03974	13.7183
1.02522	1.08618	1.28282	1.12969	1.0591		2.39336	1.1012	1.06856	1.03318	1.88563		1.92294	1.77528	1.59545	1.88024	1.48462		6.07265	2.66255	8.78636	4.37855	3.64898		8.7117	9.46665	9.06395	9.43082	14.1715		8.32477	8.9579	9.59984	8.04536	13.4263
1.01869	1.08507	1.27145	1.09756	1.05774		2.38203	1.09207	1.06561	1.03484	1.9034		1.9319	1.78161	1.58564	1.88307	1.46894		6.10465	2.73204	8.6089	4.46053	3.64379		8.84353	9.43702	9.23086	9.37667	14.0242		8.45556	8.99591	9.42248	7.86967	13.5261
1.01453	1.08366	1.26761	1.1083	1.04828		2.38152	1.1043	1.0655	1.03391	1.87454		1.93298	1.77785	1.58083	1.87985	1.45549		6.11091	2.62752	8.58153	4.47473	3.64717		8.72941	9.43138	9.08662	9.37377	14.1394		8.4523	8.98909	9.77389	7.84156	13.8374
1.0176	1.08466	1.27141	1.07008	1.05747		2.33702	1.11594	1.0506	1.0331	1.8655		1.92783	1.80574	1.57296	1.88983	1.46858		6.0902	2.74802	8.68903	4.50305	3.70137		8.72509	9.47351	9.24834	9.47519	14.0436		8.42148	8.96354	9.40085	8.03106	13.3725
1.01173	1.0834	1.26975	1.09857	1.05022		2.35904	1.10012	1.06068	1.04083	1.87047		1.93735	1.84015	1.55185	1.87186	1.49504		6.09148	2.67537	8.4476	4.60064	3.63932		8.74762	9.4653	9.08543	9.46743	14.0281		8.39861	8.97556	9.4937	7.9651	13.9759
1.02192	1.08206	1.25789	1.10044	1.05063		2.37153	1.09835	1.06172	1.0318	1.84725		1.94735	1.79163	1.55088	1.88865	1.48597		6.12844	2.76883	8.75397	4.38225	3.69687		8.80346	9.44878	9.25373	9.47603	14.1153		8.15062	8.95694	9.43079	8.03991	13.1029
1.02471	1.08277	1.26869	1.09524	1.05043		2.38042	1.08407	1.06233	1.0293	1.87257		1.94202	1.80339	1.60678	1.93429	1.47551		6.15096	2.77078	8.77525	4.3542	3.71345		8.78636	9.45029	9.11711	9.51693	14.1647		8.12161	8.98685	9.17829	7.81885	13.7365
1.02874	1.08624	1.26561	1.10493	1.05352		2.40817	1.07698	1.06664	1.03286	1.85751		1.94355	1.79645	1.60397	1.91673	1.48377		6.13917	2.77839	8.71332	4.49593	3.69247		8.6089	9.4057	9.28565	9.50071	14.1704		8.36241	8.965	9.3322	7.9503	13.2802
1.0269	1.08552	1.25645	1.08989	1.06357		2.36551	1.09133	1.08093	1.03206	1.86557		1.94934	1.84417	1.5809	1.90974	1.47573		6.15089	2.80957	8.54025	4.44213	3.64443		8.58153	9.3854	9.11067	9.51052	14.2175		8.00155	8.9443	8.96533	7.8654	13.7322
1.02113	1.08441	1.26019	1.06574	1.0629		2.27515	1.10065	1.08456	1.03147	1.8097		1.95277	1.81261	1.56335	1.89043	1.49802		6.13521	2.80676	8.60252	4.27957	3.683		8.68903	9.3814	9.3315	9.49869	14.1554		8.26578	8.96928	9.07019	7.94999	13.8171
1.01679	1.08311	1.27139	1.11391	1.06689		2.30676	1.08348	1.07487	1.03403	1.82611		1.95606	1.81363	1.56397	1.88729	1.50199		6.14965	3.00334	8.62025	4.32928	3.75096		8.4476	9.35098	9.12733	9.52446	14.3038		8.4679	8.95457	9.21301	8.0857	13.5547
1.02124	1.08531	1.26513	1.11651	1.06611		2.32368	1.09936	1.08519	1.03975	1.81549		1.96974	1.81627	1.56383	1.92501	1.51139		6.13645	2.81377	8.79943	4.45783	3.73807		8.75397	9.35799	9.30371	9.51595	14.2332		8.37805	8.95765	8.87839	8.18425	14.2542
1.01759	1.0826	1.26938	1.0945	1.06539		2.29144	1.10439	1.08313	1.04234	1.84726		1.98008	1.78829	1.58828	1.88612	1.50802		6.15113	2.94257	8.61703	4.615	3.71897		8.77525	9.38879	9.10831	9.5724	14.2763		8.35998	8.95513	9.00004	8.07867	13.8811
1.02329	1.08293	1.2646	1.093	1.06091		2.3595	1.10742	1.08832	1.04278	1.83867		1.97716	1.79835	1.59396	1.90654	1.48661		6.18396	2.71156	8.61683	4.46457	3.69339		8.71332	9.33868	9.32011	9.58922	14.1975		8.41467	8.94829	9.17086	8.04877	13.8498
1.01739	1.08133	1.26442	1.085	1.06383		2.34012	1.11617	1.0855	1.03684	1.84789		1.98203	1.81753	1.58929	1.91056	1.47886		6.16504	2.61433	8.69437	4.62972	3.7545		8.54025	9.39601	9.08514	9.63845	14.0876		8.55737	8.95208	9.21706	7.67787	13.5553
1.02238	1.08554	1.26134	1.09943	1.06143		2.36757	1.13153	1.07961	1.04137	1.85104		1.97783	1.82714	1.60023	1.94188	1.48087		6.18866	2.79183	8.68823	4.28667	3.82946		8.60252	9.40917	9.30296	9.62083	14.195		8.54683	8.93631	9.02771	7.72629	13.7464
1.0144	1.08395	1.25546	1.13025	1.061		2.40241	1.12385	1.07677	1.03032	1.84666		1.98866	1.81269	1.61891	1.89179	1.48367		6.20007	2.76272	8.54134	4.31368	3.83051		8.62025	9.35953	9.0843	9.63741	14.0196		8.22472	8.94369	9.29239	7.84592	13.884
1.01862	1.08259	1.26286	1.0993	1.06061		2.37942	1.1058	1.08114	1.02915	1.8467		1.99269	1.80163	1.60699	1.88292	1.49151		6.19687	2.75223	8.58456	4.67693	3.86102		8.79943	9.39477	9.32673	9.68538	14.1133		8.4479	8.95841	9.21249	7.77108	13.4505
1.01667	1.08294	1.2487	1.08894	1.06055		2.34154	1.09529	1.07231	1.02964	1.88447		1.99516	1.79842	1.61937	1.92061	1.50708		6.20695	2.72734	8.66909	4.4872	3.88696		8.61703	9.40516	9.1165	9.62223	14.0559		8.14827	8.94834	9.22148	8.0223	13.7627
1.01432	1.08253	1.24567	1.0706	1.05605		2.41007	1.13187	1.07519	1.03405	1.91063		1.99478	1.80851	1.6278	1.90799	1.49571		6.22848	2.81394	8.52363	4.51748	3.9521		8.61683	9.37118	9.32928	9.68387	14.047		8.02689	8.90996	9.25493	7.76691	13.7699
1.021	1.08112	1.26205	1.12881	1.05925		2.35877	1.1251	1.07123	1.03113	1.8991		2.00244	1.83198	1.64525	1.93423	1.49713		6.19804	2.84664	8.63271	4.46704	3.95333		8.69437	9.37505	9.10344	9.73244	14.1713		8.55977	8.90492	9.59047	7.73326	13.6524
1.0168	1.08238	1.25299	1.09913	1.06381		2.36448	1.12101	1.07251	1.02766	1.88282		2.002	1.81116	1.64648	1.91192	1.49769		6.21126	2.77551	8.71635	4.4229	3.88481		8.68823	9.37325	9.37012	9.66325	14.2658		8.16134	8.90618	9.7101	7.73379	13.7622
1.02345	1.08031	1.25214	1.08639	1.0598		2.44852	1.12708	1.07373	1.04189	1.87316		2.00312	1.83133	1.64475	1.89629	1.51047		6.23829	2.91222	8.72946	4.62502	3.88798		8.54134	9.35991	9.14462	9.66567	13.9636		8.01592	8.90144	9.68257	7.85322	13.4496
1.02284	1.0806	1.24268	1.09374	1.06357		2.4018	1.11702	1.07237	1.0353	1.86261		2.00371	1.83852	1.64037	1.95666	1.49679		6.23998	2.78508	8.57103	4.39324	3.9603		8.58456	9.37285	9.24341	9.73863	13.9985		8.14704	8.89242	9.57703	7.55589	13.8897
1.0185	1.08225	1.23697	1.10132	1.0623		2.35799	1.12431	1.07692	1.03389	1.85789		2.00636	1.83169	1.63768	1.91042	1.48369		6.22766	2.77068	8.61087	4.50751	3.86413		8.66909	9.37431	9.23601	9.7583	13.9164		7.92799	8.90644	9.50116	7.77658	13.3783
1.01534	1.08093	1.23837	1.09512	1.0704		2.45299	1.1269	1.07566	1.03357	1.8799		2.01516	1.8466	1.6367	1.9514	1.48104		6.24795	2.85678	8.68589	4.33528	3.93779		8.52363	9.37984	9.13269	9.71481	13.9687		8.17557	8.9249	9.58773	7.62145	13.6695
1.0245	1.08036	1.2399	1.13472	1.065		2.44199	1.11367	1.078	1.03066	1.86727		2.00773	1.83152	1.61574	1.92862	1.4889		6.24526	2.7414	8.54722	4.51716	3.94178		8.63271	9.40569	9.35779	9.79117	13.9182		8.40447	8.91463	9.42605	8.00189	13.3953
1.02004	1.08024	1.23435	1.09751	1.06541		2.4638	1.10042	1.08298	1.03883	1.85139		2.0105	1.85204	1.62152	1.96257	1.5187		6.24255	2.55779	8.73511	4.28333	3.96443		8.71635	9.41855	9.15911	9.826	13.9578		8.4801	8.90909	9.37536	8.03041	13.9025
1.0297	1.08173	1.2343	1.10752	1.05726		2.43668	1.11763	1.07597	1.03192	1.86345		2.00439	1.83546	1.60476	1.95723	1.46974		6.26047	2.68139	8.57423	4.33435	3.95492		8.72946	9.40592	9.39383	9.79112	14.0219		8.33375	8.90445	9.44341	7.82152	13.9176
1.01626	1.07761	1.23643	1.10068	1.06329		2.4718	1.11927	1.0754	1.03055	1.91528		2.00834	1.84353	1.60008	1.98105	1.48546		6.26225	2.90827	8.63155	4.44924	3.93728		8.57103	9.39394	9.1641	9.84878	13.9441		8.32034	8.89052	9.16961	7.84177	13.641
1.01422	1.08115	1.2377	1.09536	1.06384		2.5549	1.11211	1.07332	1.03062	1.91342		2.01462	1.85347	1.62729	1.95593	1.53454		6.25598	2.86903	8.59339	4.38958	3.98465		8.61087	9.374	9.32348	9.83732	14.0213		8.00735	8.8967	9.32025	7.92484	13.924
1.01673	1.07933	1.24276	1.12072	1.05264		2.48737	1.11655	1.07337	1.034	1.92535		2.0158	1.86188	1.62283	1.95092	1.50073		6.28946	2.6225	8.71134	4.51917	4.02054		8.68589	9.37134	9.15262	9.8476	14.0167		8.25746	8.90972	9.05128	7.79575	13.4998
1.02681	1.07917	1.23828	1.08778	1.05396		2.50253	1.11111	1.07229	1.03245	1.93254		2.00857	1.87595	1.63003	1.94073	1.52984		6.29017	2.8571	8.57119	4.54396	4.00097		8.54722	9.33369	9.34451	9.90188	14.0243		8.15956	8.89382	9.25458	7.71125	13.5507
1.01993	1.07914	1.24599	1.08232	1.06096		2.47737	1.10759	1.08275	1.04204	1.90472		2.0151	1.85875	1.7166	1.97444	1.51579		6.29618	2.6743	8.69196	4.42166	4.01169		8.73511	9.33704	9.11506	9.91317	14.005		8.25212	8.91859	9.3981	8.01914	13.8192
1.01307	1.0793	1.24036	1.09908	1.06556		2.49519	1.1063	1.08029	1.04232	1.87427		2.01275	1.8424	1.74198	1.98705	1.53993		6.28298	2.62969	8.65041	4.28747	4.0662		8.57423	9.38334	9.35358	9.86473	14.0408		8.04717	8.88268	9.3247	7.74595	13.8167
1.02144	1.07784	1.2411	1.12325	1.06099		2.48895	1.0996	1.08737	1.04166	1.96348		2.01671	1.86777	1.75289	1.95509	1.53134		6.30795	2.71194	8.69806	4.40258	4.03795		8.63155	9.37159	9.11933	9.89313	14.0306		8.11525	8.88415	9.30716	7.72782	13.9179
1.01569	1.07854	1.23455	1.10813	1.05613		2.4636	1.11256	1.08857	1.04263	1.99434		2.01245	1.85545	1.75104	1.99774	1.51125		6.32844	2.69636	8.68737	4.53805	3.97316		8.59339	9.38507	9.29932	9.93018	14.1965		8.25179	8.89975	9.31162	7.74178	14.1459
1.01138	1.07777	1.23521	1.1341	1.05924		2.50036	1.10108	1.0851	1.04508	2.01222		2.02423	1.87005	1.72174	1.99908	1.53105		6.32432	2.57363	8.68058	4.35693	4.05417		8.71134	9.37946	9.11982	9.9213	14.0408		7.96005	8.88871	9.22797	7.66008	14.023
1.02343	1.07814	1.23154	1.1208	1.0571		2.5152	1.1038	1.08588	1.0406	1.99109		2.01544	1.86336	1.70255	1.98782	1.52045		6.31781	2.79991	8.68361	4.35144	4.02055		8.57119	9.32471	9.33583	9.87552	14.0696		8.38159	8.88031	9.29105	7.75956	14.1547
1.0069	1.07959	1.23609	1.10056	1.05877		2.54538	1.11402	1.08956	1.03884	1.94681		2.01968	1.8843	1.71839	2.0297	1.52687		6.32681	2.87544	8.75472	4.38138	4.03383		8.69196	9.31466	9.11263	9.9615	14.1799		8.31579	8.8908	9.35261	7.89872	13.8972
1.02564	1.07838	1.24034	1.11912	1.04769		2.59882	1.10042	1.08435	1.03229	1.99581		2.02074	1.87493	1.70927	1.99129	1.51698		6.31673	2.90708	8.53832	4.22918	3.95895		8.65041	9.24983	9.31612	9.92808	13.9739		8.19812	8.89968	9.10433	7.7698	13.9758
1.02145	1.07866	1.23745	1.12992	1.05014		2.56278	1.09203	1.086	1.03466	1.98905		2.02573	1.8845	1.69019	2.02331	1.52424		6.32783	2.76473	8.5068	4.37298	4.00464		8.69806	9.1902	9.10469	9.91875	14.075		8.34438	8.90212	9.25464	7.54431	13.9571
1.01932	1.07793	1.23099	1.12029	1.05876		2.59299	1.09375	1.08617	1.03639	1.96088		2.02644	1.86829	1.71508	1.99635	1.50344		6.33821	2.84183	8.56439	4.46632	4.00883		8.68737	9.29027	9.24742	9.96353	14.2731		8.22532	8.8635	9.09299	7.92921	13.7963
1.01607	1.07786	1.23869	1.12029	1.057		2.61769	1.10225	1.07913	1.03328	1.92527		2.03731	1.8754	1.70566	2.0288	1.51779		6.32225	2.6953	8.57079	4.32437	3.9896		8.68058	9.25634	9.13599	9.96355	14.0209		8.34758	8.87862	9.10469	7.77998	14.0444
1.01772	1.07936	1.23366	1.12851	1.05048		2.57527	1.09236	1.08379	1.04514	2.00123		2.03246	1.88473	1.67665	2.02054	1.52934		6.33342	2.81727	8.58639	4.57698	3.91786		8.68361	9.19091	9.35025	9.96781	13.9876		8.20528	8.87521	9.31534	7.89884	14.5222
1.01715	1.0797	1.23277	1.07147	1.05768		2.54488	1.09249	1.07493	1.04197	2.04371		2.03818	1.89517	1.65459	2.02671	1.53133		6.3462	2.74615	8.52415	4.47783	4.0198		8.75472	9.24971	9.10988	10.0437	13.9541		8.14014	8.86328	9.14526	7.59382	14.4257
1.01127	1.07916	1.22217	1.12089	1.05399		2.57961	1.10186	1.06718	1.04565	1.99982		2.0467	1.88964	1.67701	2.01249	1.53712		6.36029	2.84319	8.66513	4.44351	4.00336		8.53832	9.23578	9.3346	10.0288	14.0349		8.14405	8.85219	9.07632	7.70397	14.2379
1.0211	1.08073	1.22932	1.11845	1.05428		2.58583	1.10577	1.08117	1.04507	1.98313		2.04204	1.88901	1.67541	2.0429	1.52427		6.36698	2.69414	8.72115	4.24134	4.04584		8.5068	9.19018	9.09273	10.0317	14.0165		8.38256	8.87782	9.29745	8.10822	14.1417
1.01877	1.07837	1.22573	1.12091	1.05459		2.57248	1.10257	1.0756	1.03418	1.95315		2.04689	1.90042	1.68367	2.04293	1.54579		6.36296	2.88268	8.59926	4.53808	4.10276		8.56439	9.23256	9.23155	10.0207	13.7512		8.27714	8.86684	9.38334	7.84441	13.9583
1.02605	1.07916	1.22923	1.12929	1.04764		2.57472	1.09051	1.07205	1.03288	1.92522		2.04423	1.89166	1.65353	2.01872	1.54749		6.35582	2.71357	8.67095	4.26705	4.09269		8.57079	9.21251	9.10471	10.0688	13.9495		8.42198	8.86623	9.47074	7.94372	14.1938
1.02673	1.07896	1.23248	1.10454	1.06113		2.59745	1.09961	1.07413	1.0351	1.95582		2.05538	1.89382	1.64905	2.0274	1.54241		6.37569	2.74433	8.65605	4.40097	4.05638		8.58639	9.17765	9.30249	10.015	13.8976		8.32586	8.85774	9.40637	7.66713	14.1607
1.02395	1.07923	1.22472	1.09322	1.06057		2.55314	1.09363	1.06937	1.03365	1.92361		2.06942	1.8986	1.63341	2.04181	1.5593		6.37288	2.86474	8.71532	4.44048	4.12623		8.52415	9.20541	9.05622	10.0867	13.9256		8.69127	8.86557	9.31135	7.59688	14.0448
1.02357	1.07871	1.22388	1.09976	1.05591		2.51917	1.09065	1.07429	1.02301	1.96863		2.07659	1.90284	1.62345	2.06829	1.55802		6.35408	2.68717	8.81307	4.55683	4.07559		8.66513	9.1979	9.19881	10.0713	13.8083		8.52095	8.84564	9.43542	8.15541	13.9232
1.02781	1.07653	1.21236	1.1266	1.06231		2.51537	1.09566	1.06481	1.03551	2.03979		2.07778	1.91448	1.66053	2.05351	1.56268		6.37127	2.69713	8.69772	4.5015	4.08617		8.72115	9.16073	9.0919	10.0826	13.9035		8.66346	8.85106	9.3191	7.84752	14.5124
1.02212	1.07803	1.21708	1.11682	1.06786		2.51525	1.09116	1.0788	1.0336	2.03116		2.07656	1.90319	1.66989	2.0582	1.55767		6.36737	2.77015	8.64298	4.44449	4.15327		8.59926	9.19992	9.13337	10.1129	13.9362		8.49408	8.83998	9.41202	7.8363	14.0712
1.01437	1.07731	1.20799	1.15175	1.04895		2.53679	1.08356	1.08537	1.04445	2.01456		2.07415	1.92121	1.67108	2.06462	1.57326		6.38584	2.8507	8.63451	4.37159	4.09534		8.67095	9.24179	9.1638	10.1445	13.9535		8.48671	8.84237	9.51534	8.10893	14.2828
1.0204	1.07672	1.20966	1.13995	1.06017		2.49174	1.08826	1.08643	1.04174	2.00616		2.07472	1.92672	1.65597	2.07027	1.56908		6.39217	2.76897	8.80039	4.34445	4.18892		8.65605	9.15054	9.09084	10.1145	13.9045		8.41389	8.84477	9.04746	8.00807	13.7789
1.02058	1.07668	1.21949	1.10335	1.06381		2.45675	1.09844	1.07385	1.03246	1.98899		2.08384	1.91724	1.65327	2.11108	1.569		6.39935	2.75388	8.62394	4.62097	4.12116		8.71532	9.19586	9.25764	10.1234	13.9385		8.30319	8.8305	8.77054	7.95918	13.9619
1.02325	1.07758	1.2179	1.11566	1.05154		2.51909	1.10253	1.06922	1.02629	2.01829		2.08356	1.91989	1.65502	2.10269	1.5385		6.40042	2.60834	8.7666	4.43143	4.16941		8.81307	9.24236	9.03421	10.1376	13.8526		8.37349	8.82985	9.15359	7.95855	14.2667
1.02281	1.07704	1.2157	1.11271	1.05698		2.56234	1.09209	1.08073	1.03254	1.99574		2.09122	1.91745	1.68471	2.06083	1.58743		6.42268	2.64251	8.6234	4.45288	4.05649		8.69772	9.21542	9.27688	10.1417	13.8512		8.3127	8.82202	9.2892	7.73758	13.8823
1.02031	1.07824	1.20446	1.12499	1.064		2.55322	1.07091	1.06997	1.02444	2.00633		2.09692	1.93356	1.67138	2.12623	1.57272		6.42406	2.74266	8.5587	4.33715	4.0928		8.64298	9.18099	9.03647	10.1973	13.9798		8.40897	8.82719	8.83529	7.52478	14.3869
1.01417	1.07785	1.20923	1.12666	1.06282		2.5447	1.07919	1.08711	1.04198	2.02831		2.10241	1.94592	1.66809	2.09289	1.59026		6.40932	2.58754	8.73684	4.36294	4.09143		8.63451	9.24478	9.21641	10.1955	14.0465		8.56267	8.83247	9.24905	7.94441	14.0571
1.00338	1.07678	1.21491	1.11961	1.06265		2.51025	1.09765	1.07311	1.03492	2.03122		2.10315	1.92969	1.67015	2.09316	1.58514		6.40893	2.74765	8.62023	4.57957	4.03672		8.80039	9.22239	9.03586	10.1612	13.8754		8.37933	8.82445	9.1844	7.72295	13.8412
1.01686	1.07788	1.20607	1.12634	1.06082		2.54359	1.10418	1.07664	1.03719	2.01402		2.12064	1.9466	1.66348	2.10057	1.58238		6.39621	2.58257	8.58695	4.52942	4.06716		8.62394	9.21401	9.22525	10.1439	13.9064		8.32491	8.81439	9.19889	8.06292	13.9061
1.01893	1.07709	1.21172	1.09172	1.05326		2.5278	1.1139	1.07246	1.03508	1.99445		2.13152	1.94051	1.67779	2.12423	1.56764		6.42632	2.6056	8.77864	4.41259	4.06104		8.7666	9.24996	9.03759	10.186	13.9117		8.41238	8.80987	9.37377	7.92551	13.6415
1.02652	1.07746	1.20729	1.10126	1.05805		2.5082	1.10791	1.08716	1.03601	1.9937		2.13865	1.94524	1.66786	2.08548	1.58144		6.40422	2.71127	8.51234	4.40306	4.01259		8.6234	9.2508	9.27323	10.1691	13.839		8.40815	8.79916	9.40526	8.11292	14.1064
1.01462	1.07872	1.20477	1.09287	1.06007		2.53693	1.08872	1.08291	1.01672	2.00854		2.1426	1.95393	1.68415	2.10133	1.57966		6.41658	2.68505	8.59332	4.55528	4.0688		8.5587	9.15508	9.01242	10.1811	13.952		8.19658	8.8062	8.91064	7.70968	14.0152
1.02006	1.0775	1.20382	1.10695	1.0682		2.52029	1.09012	1.06194	1.04	2.06258		2.14473	1.936	1.68524	2.10102	1.57297		6.41378	2.55877	8.75025	4.46759	4.06357		8.73684	9.15545	9.22411	10.1392	13.9183		8.1759	8.78166	9.13973	8.02883	13.8208
1.01984	1.07817	1.21271	1.11813	1.07296		2.45039	1.09817	1.067	1.03241	2.06096		2.16308	1.93958	1.64928	2.11537	1.54287		6.4324	2.58423	8.62175	4.32345	4.10302		8.62023	9.15246	9.03313	10.1621	13.985		8.52571	8.78774	9.55415	7.85082	14.016
1.02159	1.07812	1.20977	1.08716	1.07265		2.50547	1.09059	1.07663	1.02844	2.04562		2.16576	1.94923	1.67176	2.0878	1.57869		6.43263	2.59959	8.6847	4.41447	4.07574		8.58695	9.12132	9.22661	10.1537	13.8024		8.30848	8.78237	9.3548	7.69041	13.5915
1.01148	1.07774	1.21203	1.12536	1.07088		2.54988	1.0885	1.08691	1.02281	2.01277		2.17229	1.95095	1.69208	2.07365	1.55731		6.44874	2.74006	8.57237	4.12961	4.12431		8.77864	9.14041	8.9894	10.1547	13.815		8.60336	8.75945	9.39502	7.96312	13.7002
1.02239	1.07663	1.20876	1.09692	1.06663		2.53077	1.12603	1.07581	1.0364	2.04178		2.16003	1.95942	1.66245	2.09206	1.56892		6.43972	2.66209	8.6887	4.35162	4.05272		8.51234	9.13552	9.22635	10.0989	14.0588		8.3517	8.77469	9.41439	8.03015	13.6705
1.01315	1.07666	1.21441	1.08282	1.06347		2.51808	1.14347	1.07343	1.03506	2.05336		2.17213	1.95126	1.66287	2.1206	1.58533		6.43211	2.68354	8.61764	4.17613	4.20299		8.59332	9.08976	9.00014	10.1074	14.0615		8.42203	8.77887	9.30679	8.04366	13.7382
1.0199	1.07468	1.21239	1.113	1.06432		2.53734	1.13654	1.08105	1.02565	2.05834		2.17005	1.9464	1.65051	2.11632	1.56651		6.43139	2.77696	8.55349	4.34829	4.17264		8.75025	9.09162	9.20026	10.1402	13.9538		8.45706	8.7772	8.90373	7.83812	13.4885
1.02185	1.07559	1.20513	1.07403	1.06821		2.53758	1.17043	1.08387	1.04522	2.0928		2.17508	1.93042	1.65742	2.11441	1.56345		6.44449	3.00554	8.62529	4.23876	4.15451		8.62175	9.10471	8.99547	10.1169	13.9006		8.25731	8.7698	9.15641	8.03657	13.7253
1.013	1.07548	1.21513	1.12375	1.06453		2.53098	1.16071	1.07731	1.03478	2.14083		2.17199	1.94337	1.6734	2.14695	1.56167		6.42671	2.86109	8.59195	4.2944	4.11191		8.6847	9.05114	9.17285	10.1061	13.8497		8.00378	8.75552	9.05092	7.70615	13.7051
1.01609	1.07615	1.2052	1.11377	1.06167		2.50183	1.15449	1.07703	1.03563	2.11647		2.17844	1.95888	1.72233	2.14575	1.57911		6.45056	2.82147	8.71121	4.09928	4.13794		8.57237	9.05476	8.95925	10.1844	13.7955		8.05863	8.7648	9.07108	7.85485	12.8961
1.01125	1.07598	1.21635	1.11076	1.07277		2.47377	1.15177	1.0761	1.02652	2.07949		2.18507	1.97325	1.71655	2.17691	1.58087		6.44678	2.90747	8.53798	4.41015	4.10138		8.6887	9.06466	9.2018	10.1062	13.8966		8.0123	8.75623	9.03711	7.98724	13.0675
1.01887	1.0757	1.21097	1.10243	1.06818		2.4697	1.13532	1.07446	1.03634	2.13042		2.18335	1.97093	1.6956	2.14009	1.5709		6.45572	2.99839	8.56497	4.35764	4.13252		8.61764	9.02646	8.94803	10.1089	13.7379		8.06946	8.73843	9.19352	7.81857	13.2052
1.01802	1.07482	1.21105	1.10649	1.06556		2.51378	1.13578	1.07452	1.03634	2.10492		2.18659	1.94913	1.69073	2.1533	1.59609		6.46763	2.89355	8.54103	4.13843	4.03441		8.55349	9.03395	9.10186	10.1596	13.8931		8.12514	8.71426	9.27563	7.83612	13.1641
1.0172	1.07453	1.22138	1.05646	1.06618		2.5479	1.13311	1.06916	1.03559	2.0673		2.17639	1.95468	1.68929	2.12863	1.58714		6.45414	2.90034	8.47468	4.37843	4.05841		8.62529	9.07373	8.92505	10.1724	13.7214		8.16288	8.72014	9.31822	8.00314	12.8774
1.01622	1.07367	1.21298	1.07391	1.07217		2.52005	1.13796	1.06704	1.03457	2.09301		2.19152	1.97738	1.69971	2.14567	1.58872		6.4435	2.96389	8.64414	4.20643	4.00354		8.59195	9.02213	9.12324	10.1535	13.8613		8.30944	8.7302	9.31441	7.8045	13.1905
1.02251	1.07408	1.20946	1.08822	1.06272		2.56536	1.12976	1.06181	1.03552	2.09113		2.19067	1.95172	1.7125	2.12885	1.56984		6.47877	3.0975	8.6022	4.3304	4.05099		8.71121	9.01447	8.86911	10.1514	13.7785		8.30879	8.72479	9.30108	7.94444	13.3458
1.01746	1.07316	1.20715	1.10924	1.07551		2.49132	1.13865	1.06873	1.03815	2.11466		2.18748	1.96948	1.71445	2.1305	1.57108		6.50035	2.97481	8.51368	4.31346	3.98889		8.53798	9.04913	9.04247	10.1628	13.8098		8.39732	8.7429	9.20169	7.93572	13.3202
1.01147	1.0734	1.20486	1.1103	1.06356		2.52228	1.13421	1.07946	1.03173	2.1166		2.18983	1.99766	1.73344	2.14838	1.60755		6.49125	2.86368	8.58218	4.28888	4.0507		8.56497	9.04777	8.89805	10.1359	13.8203		8.48521	8.75675	9.16184	7.86914	12.8464
1.02046	1.07607	1.20075	1.11403	1.05781		2.48629	1.13498	1.07232	1.02593	2.16508		2.18355	1.98243	1.70835	2.14758	1.59124		6.49726	2.99274	8.72242	4.38805	3.99464		8.54103	9.01821	9.10255	10.1644	13.9708		8.48097	8.73663	9.1372	7.71573	13.0397
1.02021	1.07561	1.19716	1.12437	1.06058		2.49358	1.13572	1.08164	1.04119	2.19997		2.18574	1.99427	1.72084	2.18732	1.61138		6.48862	3.1278	8.6887	4.38949	3.97459		8.47468	9.06712	8.87767	10.1798	13.8705		8.33198	8.72317	9.55667	7.76072	13.0976
1.02328	1.07443	1.19799	1.09145	1.06626		2.47976	1.13044	1.07166	1.04234	2.39294		2.18783	1.98401	1.7469	2.18983	1.58719		6.48143	3.1308	8.60429	4.36248	3.94377		8.64414	9.063	9.08576	10.1896	13.8771		8.60231	8.73185	9.26662	7.93871	13.0908
1.01644	1.07391	1.19344	1.07733	1.05743		2.51479	1.13528	1.07188	1.03377	2.45472		2.17952	1.99891	1.75745	2.15077	1.61219		6.48588	2.98101	8.52658	4.46175	3.95674		8.6022	9.02437	8.84244	10.2472	13.8652		8.40644	8.71471	9.27636	7.97273	12.7022
1.02528	1.07324	1.20458	1.06773	1.05724		2.55705	1.11965	1.07103	1.03427	2.35825		2.17617	2.00807	1.73188	2.20205	1.59921		6.48958	3.00536	8.56269	4.31428	3.85545		8.51368	9.0625	8.9919	10.1912	13.8139		8.33729	8.71476	9.48932	7.88439	12.9049
1.02584	1.0731	1.19629	1.07344	1.05726		2.54684	1.10714	1.05584	1.03454	2.24996		2.18055	1.99848	1.72978	2.18772	1.62552		6.49711	3.08319	8.61325	4.3801	3.9056		8.58218	9.04548	8.83379	10.2245	13.8981		8.54118	8.69868	9.45287	7.72719	13.1277
1.01859	1.07334	1.20115	1.10151	1.05615		2.54165	1.10036	1.06836	1.03608	2.27573		2.17517	2.0031	1.72782	2.2125	1.63718		6.4936	3.09679	8.60468	4.24246	4.03318		8.72242	9.01895	9.02559	10.2409	13.7889		8.46297	8.73187	9.38873	7.93681	12.8801
1.02521	1.07371	1.20519	1.09209	1.0574		2.57314	1.0962	1.06687	1.04505	2.36481		2.16653	1.98611	1.71935	2.22686	1.66363		6.48925	3.0024	8.76752	3.98863	3.9365		8.6887	9.04007	8.83253	10.251	13.7339		8.34761	8.72972	9.43372	7.70961	12.5938
1.01545	1.07513	1.20684	1.08342	1.05268		2.51345	1.10077	1.06623	1.04034	2.3232		2.16731	1.99452	1.74647	2.18421	1.62206		6.49544	3.06189	8.71589	4.38964	4.01783		8.60429	9.0383	9.02873	10.1884	13.6642		8.14209	8.71805	9.48134	7.86344	12.9068
1.01534	1.07422	1.19649	1.09393	1.05956		2.54103	1.10502	1.05385	1.03799	2.29341		2.18024	1.99377	1.76496	2.21511	1.63607		6.49709	2.98142	8.54359	4.35294	3.96403		8.52658	9.03153	8.79597	10.2601	13.7755		8.09388	8.71227	9.45098	8.03459	12.6784
1.02028	1.07284	1.19996	1.12272	1.05892		2.55138	1.1266	1.05913	1.03798	2.24568		2.17199	1.99846	1.78639	2.18904	1.63162		6.50625	3.12286	8.4584	4.33354	3.99567		8.56269	9.03968	9.00192	10.2366	13.709		8.04554	8.70893	9.57155	7.81638	12.8494
1.02792	1.07412	1.20386	1.14431	1.05404		2.48271	1.11735	1.05487	1.03659	2.24645		2.17294	2.01125	1.77936	2.20734	1.57694		6.49666	3.07477	8.69846	4.22966	3.95675		8.61325	9.04436	8.79538	10.2267	13.6919		7.96707	8.71191	9.63988	7.94132	12.7134
1.02206	1.07435	1.19328	1.06662	1.05355		2.53736	1.11144	1.0569	1.03708	2.21453		2.17137	2.02229	1.77996	2.19362	1.62994		6.48779	3.04087	8.50564	4.38854	3.99336		8.60468	8.97014	9.00385	10.3127	13.6895		8.06681	8.71844	9.30163	7.64141	12.6403
1.0141	1.07174	1.19423	1.08115	1.05228		2.58812	1.11578	1.06265	1.03783	2.25143		2.1639	2.01116	1.76641	2.20543	1.63167		6.49167	3.04202	8.44028	4.37631	3.95336		8.76752	8.9868	8.77758	10.3276	13.7249		8.14803	8.69781	9.32055	7.74818	12.4619
1.02016	1.07354	1.195	1.10668	1.0597		2.57184	1.13155	1.05188	1.04129	2.29495		2.17228	2.03703	1.75924	2.19214	1.59851		6.50616	3.08102	8.5215	4.51091	4.01063		8.71589	8.99566	9.00849	10.3412	13.6984		8.16267	8.70434	9.1642	7.55578	12.6055
1.02158	1.07358	1.1911	1.08912	1.05354		2.6245	1.11456	1.06327	1.02789	2.33364		2.17766	2.02798	1.76432	2.20247	1.60882		6.5182	2.95321	8.73665	4.22065	4.02295		8.54359	8.94015	8.7545	10.3385	13.6131		8.1021	8.69763	9.05912	7.82958	12.3077
1.01586	1.07328	1.19327	1.10898	1.05472		2.58706	1.11529	1.05479	1.03925	2.32121		2.17548	2.02654	1.76887	2.20762	1.6037		6.52459	2.95603	8.50694	4.3344	3.9643		8.4584	8.9535	8.90216	10.3437	13.6884		8.04412	8.69711	9.29563	7.81088	12.7296
1.02393	1.07442	1.19618	1.09642	1.05011		2.54152	1.12135	1.06159	1.03832	2.29408		2.18254	2.00909	1.78048	2.19605	1.56727		6.50234	2.7536	8.56328	4.44026	3.99025		8.69846	8.98169	8.74795	10.3311	13.6513		7.90424	8.66975	8.86873	7.77814	12.7598
1.02352	1.07286	1.18647	1.07905	1.05991		2.56822	1.11032	1.06411	1.04156	2.29538		2.17727	2.01583	1.79001	2.20406	1.60109		6.52578	2.63891	8.49591	4.04062	3.99822		8.50564	8.94313	8.88749	10.4094	13.6715		8.06576	8.66025	9.36333	7.70418	12.7082
1.02039	1.07187	1.18536	1.10114	1.05192		2.58113	1.10854	1.05752	1.04204	2.27271		2.19352	2.029	1.79903	2.19888	1.60931		6.52572	2.78392	8.68376	4.11976	4.05112		8.44028	8.92935	8.70624	10.4267	13.5367		8.09552	8.67254	9.42994	7.72066	12.5172
1.02407	1.0717	1.18603	1.11381	1.05732		2.6013	1.12426	1.07584	1.04102	2.29674		2.19048	2.00859	1.78576	2.24269	1.63451		6.52449	2.78918	8.57925	4.1301	4.03718		8.5215	8.95175	8.86389	10.4173	13.805		8.08799	8.66027	9.83858	7.8266	12.5585
1.01571	1.07198	1.18078	1.07662	1.05772		2.57263	1.13867	1.06423	1.03013	2.25061		2.17972	2.0242	1.77012	2.22326	1.64696		6.50863	2.69457	8.54905	4.14907	4.03533		8.73665	8.92956	8.68946	10.4336	13.848		8.09984	8.65093	9.43032	7.83581	12.3424
1.02009	1.06968	1.1892	1.09639	1.04411		2.58266	1.14266	1.06031	1.04019	2.22217		2.19027	2.0326	1.75055	2.22959	1.63878		6.50877	2.82347	8.67189	4.33485	4.07687		8.50694	8.92243	8.84263	10.4701	13.706		8.12561	8.65669	9.41376	7.68823	12.5155
1.01753	1.07165	1.18923	1.10194	1.04666		2.56041	1.14103	1.05396	1.03244	2.25826		2.1862	2.02308	1.73899	2.25309	1.6193		6.53336	2.774	8.54128	4.43317	4.06045		8.56328	8.91641	8.70292	10.4154	13.7334		8.2177	8.65986	9.25059	7.675	12.6372
1.01934	1.06952	1.18302	1.0864	1.0492		2.54628	1.13008	1.04748	1.03563	2.32026		2.19292	2.026	1.71958	2.23299	1.64702		6.51861	2.76796	8.71133	4.24576	3.99586		8.49591	8.90292	8.91208	10.4429	13.6766		8.08671	8.64197	9.25847	7.61737	12.0425
1.02402	1.06936	1.17499	1.10556	1.04681		2.5562	1.14247	1.05366	1.03898	2.36272		2.18994	2.03834	1.71721	2.25581	1.62678		6.53544	2.97049	8.64873	4.26947	4.02874		8.68376	8.88975	8.6756	10.4362	13.8062		8.18092	8.62288	9.27781	7.52905	12.5092
1.01989	1.07056	1.17426	1.06617	1.05693		2.57182	1.13053	1.05358	1.03022	2.30162		2.18937	2.04087	1.73625	2.20221	1.60335		6.5359	2.92306	8.62707	4.07191	4.11169		8.57925	8.89573	8.91459	10.3676	13.5833		8.14149	8.63416	9.45258	7.80066	12.2805
1.02112	1.07133	1.18142	1.07441	1.04685		2.50959	1.12191	1.05029	1.04045	2.27154		2.19179	2.04621	1.71023	2.26103	1.63685		6.53811	3.04309	8.64469	4.1095	4.00504		8.54905	8.88703	8.67455	10.3646	13.6988		8.07456	8.63423	9.11154	7.7009	12.327
1.02048	1.07042	1.18099	1.0839	1.04695		2.57968	1.10844	1.04627	1.03768	2.28644		2.19445	2.02721	1.71848	2.2589	1.62036		6.53313	2.9636	8.51844	4.32481	4.10007		8.67189	8.85655	8.83873	10.3371	13.7088		8.2369	8.64206	9.29018	7.96113	12.1891
1.02084	1.07195	1.1785	1.03384	1.0493		2.51026	1.12594	1.04689	1.03799	2.32359		2.19235	2.02047	1.74985	2.26487	1.61594		6.52597	2.93455	8.55302	4.46664	4.16111		8.54128	8.90443	8.64	10.2698	13.5043		8.07834	8.63076	9.14462	7.72494	12.6479
1.02038	1.07187	1.18205	1.10152	1.04461		2.62917	1.12332	1.04912	1.03678	2.27586		2.1911	2.03214	1.732	2.27883	1.61289		6.54143	2.98844	8.56001	4.47086	4.07742		8.71133	8.86978	8.89202	10.2763	13.6953		8.34406	8.62182	9.56288	7.72776	12.5283
1.01614	1.06937	1.17887	1.11802	1.05336		2.60325	1.12618	1.05292	1.03581	2.25925		2.19944	2.05204	1.72844	2.25636	1.64531		6.51537	2.99373	8.67498	4.36238	4.21683		8.64873	8.86021	8.63229	10.3238	13.5904		8.22622	8.62023	9.31978	7.72119	12.2398
1.02261	1.07033	1.19408	1.0914	1.05216		2.67245	1.13336	1.04537	1.03697	2.24604		2.19443	2.04591	1.72334	2.25096	1.65933		6.53834	3.08926	8.53239	4.2546	4.20412		8.62707	8.8871	8.83886	10.2881	13.6469		8.21675	8.61897	9.44763	7.66147	12.4739
1.0181	1.06898	1.1893	1.09145	1.05689		2.66166	1.14518	1.05117	1.02784	2.21343		2.20913	2.04827	1.71977	2.27141	1.63936		6.52956	2.98725	8.40088	3.98593	4.20635		8.64469	8.88089	8.59871	10.3041	13.6666		8.25667	8.5965	9.39801	7.91284	12.1671
1.01959	1.06852	1.18542	1.0763	1.05954		2.67533	1.15023	1.0428	1.04929	2.19838		2.20381	2.05638	1.71514	2.22297	1.6496		6.52987	2.94966	8.5319	4.32531	4.16206		8.51844	8.87982	8.77742	10.3443	13.677		8.47982	8.60417	9.5199	7.6371	12.2698
1.01898	1.06795	1.18215	1.09765	1.05923		2.64421	1.14539	1.04571	1.03736	2.19862		2.1999	2.07607	1.74842	2.26313	1.6386		6.54288	2.90405	8.54107	4.20932	4.07047		8.55302	8.88213	8.54164	10.3312	13.7145		8.23324	8.60143	9.49525	7.58216	12.1494
1.02132	1.07049	1.18746	1.10012	1.05532		2.63308	1.15047	1.04883	1.03017	2.21375		2.20582	2.05512	1.72703	2.30667	1.60948		6.56459	2.95874	8.52136	4.29695	4.16163		8.56001	8.83392	8.69885	10.3834	13.6887		8.52087	8.60202	9.49584	7.5225	11.8924
1.0201	1.07068	1.1877	1.12495	1.06171		2.61032	1.15273	1.04367	1.03364	2.28303		2.20593	2.06521	1.71071	2.28962	1.65057		6.54611	2.98067	8.43559	4.07016	4.09816		8.67498	8.817	8.51857	10.4	13.4618		8.41754	8.57996	9.42751	7.80532	11.8768
1.02125	1.06935	1.19253	1.10884	1.05738		2.67698	1.13955	1.04691	1.03666	2.36028		2.20128	2.083	1.70796	2.28604	1.67606		6.5456	3.04581	8.38287	4.066	4.20784		8.53239	8.87857	8.65316	10.3875	13.614		8.59112	8.60054	9.25639	7.86425	12.175
1.02534	1.07018	1.18703	1.11729	1.05483		2.68132	1.14301	1.04529	1.03892	2.31229		2.20645	2.06487	1.71512	2.26535	1.64966		6.56336	2.95106	8.73798	4.41165	4.16575		8.40088	8.82626	8.51244	10.4259	13.4998		8.40728	8.5925	9.2946	7.86201	11.9104
1.02997	1.06933	1.18178	1.07199	1.05681		2.67088	1.15025	1.04426	1.02728	2.2976		2.20189	2.08433	1.70627	2.27586	1.65345		6.5537	3.05577	8.55224	4.47896	4.12972		8.5319	8.84585	8.62266	10.4438	13.6744		8.18113	8.58905	9.08466	7.77327	11.8555
1.01953	1.06986	1.17565	1.03546	1.05307		2.66129	1.1548	1.04618	1.03854	2.28324		2.20955	2.08213	1.72523	2.29367	1.65921		6.56756	3.18303	8.57852	4.24588	4.14466		8.54107	8.87839	8.48719	10.4632	13.5477		8.39819	8.59018	9.5634	7.72706	11.9604
1.0189	1.06617	1.16974	1.08393	1.05426		2.78972	1.14358	1.04817	1.03719	2.27122		2.22311	2.08857	1.70193	2.31897	1.68977		6.57384	3.09132	8.53111	3.90954	4.16332		8.52136	8.83854	8.62809	10.4923	13.5554		8.41407	8.60223	9.22529	7.81384	12.1458
1.01532	1.06916	1.1782	1.11333	1.05398		2.68854	1.13507	1.04418	1.03326	2.25444		2.2208	2.10755	1.7022	2.35592	1.69701		6.57049	3.25124	8.49151	4.24645	4.19602		8.43559	8.81673	8.44256	10.5007	13.6054		8.36192	8.5989	9.44169	7.80996	11.951
1.01932	1.06934	1.17035	1.10856	1.05058		2.73085	1.12637	1.05612	1.03593	2.33516		2.22836	2.09315	1.73779	2.29694	1.69507		6.55924	3.19026	8.41186	4.0043	4.11426		8.38287	8.85297	8.59053	10.4754	13.5752		8.17924	8.56893	9.12419	8.13354	11.7101
1.02383	1.07115	1.16488	1.11929	1.05577		2.7416	1.13051	1.04273	1.03906	2.36465		2.23089	2.08542	1.71968	2.33993	1.65423		6.57586	3.07478	8.24408	4.49589	4.10723		8.73798	8.81529	8.46115	10.5353	13.533		8.22946	8.56726	9.13286	7.7144	11.8059
1.02261	1.06896	1.16647	1.10454	1.04804		2.6933	1.12284	1.04824	1.0291	2.33813		2.24003	2.08264	1.70668	2.32253	1.66415		6.57509	3.28326	8.26078	4.12402	4.15848		8.55224	8.80152	8.56913	10.5601	13.6168		8.15901	8.5688	9.11524	8.03517	11.6787
1.02361	1.06826	1.16526	1.09767	1.04689		2.66926	1.14664	1.0429	1.04677	2.34414		2.24192	2.07353	1.71182	2.34287	1.68899		6.55924	3.03452	8.35409	3.7782	4.2335		8.57852	8.82457	8.41483	10.5982	13.716		8.04827	8.55089	9.00909	7.87338	11.5256
1.01795	1.06869	1.17566	1.1157	1.05106		2.67899	1.13676	1.05413	1.03995	2.34544		2.23547	2.07113	1.70964	2.29361	1.6702		6.57751	3.12012	8.24081	4.08936	4.14909		8.53111	8.81911	8.65378	10.6476	13.5333		7.96929	8.55111	8.99239	7.92789	11.6932
1.02663	1.06742	1.17426	1.09255	1.05692		2.70395	1.11819	1.04464	1.0345	2.36774		2.24164	2.09337	1.70894	2.29724	1.6884		6.58606	2.91892	8.46175	4.20973	4.21124		8.49151	8.79527	8.43569	10.6972	13.4983		7.99118	8.54686	9.06704	8.01526	12.1521
1.0155	1.06653	1.16759	1.08803	1.04774		2.70734	1.13673	1.04366	1.02904	2.36743		2.24681	2.10191	1.74584	2.32878	1.66284		6.57436	2.93228	8.36676	4.42322	4.20491		8.41186	8.83553	8.31524	10.851	13.4939		8.24299	8.54922	9.18128	7.85813	12.0665
1.01228	1.06607	1.16239	1.10127	1.04403		2.76428	1.11895	1.04604	1.0404	2.36333		2.24178	2.09843	1.75078	2.34367	1.67692		6.585	2.99121	8.62305	4.24534	4.13729		8.24408	8.83172	8.35567	10.9446	13.7334		8.30683	8.53876	9.06937	7.75915	11.9145
1.0152	1.06603	1.17047	1.10784	1.04971		2.71736	1.12012	1.03297	1.04054	2.33396		2.23843	2.10481	1.74539	2.31921	1.69002		6.59159	2.99895	8.18924	4.27448	4.18601		8.26078	8.78468	8.61453	11.0004	13.4604		8.19253	8.55552	8.94537	8.08057	11.8522
1.01763	1.06668	1.16484	1.0828	1.04685		2.77324	1.13499	1.04415	1.02863	2.31798		2.2376	2.10906	1.72515	2.33095	1.68088		6.59094	2.83099	8.22347	4.42897	4.21358		8.35409	8.85498	8.40275	11.1229	13.4114		8.27406	8.55099	9.36273	7.74556	11.8229
1.02776	1.06601	1.15308	1.10603	1.03999		2.80932	1.14189	1.04771	1.04535	2.33738		2.24233	2.09103	1.73375	2.34141	1.67987		6.58254	3.09773	8.47898	4.16601	4.15983		8.24081	8.84061	8.34705	11.2524	13.4907		8.27487	8.53707	9.12801	7.62645	12.0952
1.02312	1.06743	1.16267	1.0677	1.0409		2.74323	1.15169	1.04795	1.03985	2.39253		2.24486	2.09642	1.7364	2.29531	1.68748		6.5866	3.0017	8.44904	4.18433	4.248		8.46175	8.80527	8.30537	11.3254	13.5522		8.41022	8.54103	9.40895	7.7385	11.917
1.01888	1.06582	1.15559	1.13156	1.04266		2.72251	1.13073	1.03746	1.03647	2.36022		2.23956	2.1372	1.73926	2.33019	1.7493		6.59786	2.93786	8.44927	4.35705	4.22736		8.36676	8.84628	8.26697	11.3024	13.5607		8.57795	8.54033	9.49863	7.7021	11.6905
1.01264	1.06555	1.15739	1.08962	1.04739		2.70498	1.13701	1.04263	1.02892	2.36659		2.23997	2.12631	1.73029	2.3798	1.72879		6.6062	3.01124	8.61704	4.35694	4.13519		8.62305	8.8374	8.27253	11.3962	13.4144		8.45158	8.53656	9.29768	7.89768	11.7878
1.01368	1.06413	1.16266	1.09301	1.04239		2.69742	1.14121	1.05656	1.04141	2.32535		2.24034	2.10209	1.74156	2.34472	1.69419		6.57649	3.11447	8.37688	4.09754	4.24508		8.18924	8.80253	8.52004	11.3882	13.71		8.4798	8.51543	9.62793	8.02025	11.6635
1.02531	1.0645	1.15476	1.11051	1.03419		2.68156	1.13212	1.06059	1.04063	2.37183		2.24504	2.11742	1.76351	2.37384	1.72501		6.59649	3.10017	8.53826	4.25523	4.15646		8.22347	8.83213	8.33631	11.3293	13.5525		8.50004	8.51329	9.48166	7.72658	11.7427
1.01336	1.06576	1.15136	1.09998	1.0377		2.77409	1.14057	1.0671	1.03135	2.50251		2.25326	2.11614	1.73419	2.37195	1.72306		6.58909	3.13691	8.3368	4.24589	4.14257		8.47898	8.80275	8.2566	11.3857	13.5354		8.37446	8.51496	9.51685	8.0209	11.8665
1.01904	1.06518	1.15739	1.13638	1.03944		2.65249	1.14841	1.06031	1.04007	2.47948		2.25211	2.11482	1.75287	2.34609	1.72613		6.56403	3.0641	8.42265	4.12857	4.12328		8.44904	8.77043	8.26432	11.3765	13.5818		8.44533	8.51056	9.32237	7.74874	11.3691
1.01949	1.06627	1.16644	1.10728	1.03963		2.67042	1.14466	1.05454	1.03211	2.44388		2.25208	2.10916	1.76246	2.34473	1.67667		6.57493	3.17805	8.45129	4.18016	4.13486		8.44927	8.81847	8.4367	11.3523	13.5633		8.66916	8.51385	9.07365	7.75885	11.624
1.02163	1.06574	1.17421	1.12139	1.04298		2.65142	1.12662	1.05538	1.03944	2.42961		2.25067	2.09488	1.75686	2.37896	1.74927		6.5854	3.11907	8.4993	4.25268	4.16204		8.61704	8.82396	8.28138	11.3545	13.5553		8.5549	8.50557	9.38499	7.66957	11.564
1.02143	1.06447	1.16791	1.07953	1.03886		2.65875	1.11624	1.04938	1.02948	2.43859		2.25312	2.12479	1.75489	2.39064	1.70743		6.58553	3.22762	8.30379	4.24674	4.21911		8.37688	8.76286	8.49546	11.3675	13.588		8.63538	8.48983	9.38043	7.75955	11.7143
1.01202	1.06455	1.17677	1.09922	1.03808		2.61251	1.11658	1.04899	1.04232	2.39684		2.25886	2.11834	1.73845	2.35058	1.69509		6.62148	3.22566	8.63874	4.16297	4.24385		8.53826	8.78935	8.25626	11.3471	13.5473		8.53418	8.48893	9.39274	7.64565	11.7017
1.0274	1.06521	1.17394	1.07893	1.03421		2.63152	1.12478	1.05293	1.0473	2.4154		2.27124	2.13492	1.75492	2.40614	1.6957		6.61496	3.18267	8.61347	4.14524	4.22208		8.3368	8.82547	8.43509	11.3852	13.5256		8.62751	8.48569	9.39087	7.7477	11.3416
1.01172	1.06557	1.17885	1.08786	1.03668		2.60058	1.12003	1.05161	1.04381	2.41463		2.26625	2.12735	1.74833	2.41691	1.70592		6.60815	3.35651	8.56218	4.018	4.16497		8.42265	8.74549	8.26135	11.388	13.5357		8.41996	8.47671	9.62183	7.71212	11.2907
1.01674	1.06456	1.16806	1.10868	1.03912		2.61873	1.13841	1.04282	1.04092	2.43344		2.26625	2.1363	1.76101	2.39592	1.69403		6.60609	3.19735	8.36564	3.93163	4.21605		8.45129	8.78341	8.40645	11.3993	13.3889		8.73943	8.47696	9.23467	7.50884	11.7319
1.01423	1.06512	1.16499	1.11697	1.0357		2.57371	1.14692	1.0524	1.04193	2.36403		2.2829	2.13256	1.75937	2.37189	1.70412		6.60296	3.1945	8.45339	3.9698	4.17031		8.4993	8.79673	8.18558	11.4171	13.4954		8.71336	8.45874	9.4334	7.72954	11.68
1.02476	1.06591	1.17053	1.13149	1.03546		2.57523	1.14361	1.05352	1.0332	2.42021		2.27021	2.14607	1.75867	2.38834	1.7305		6.60899	3.31442	8.44501	4.13682	4.22148		8.30379	8.7319	8.43574	11.412	13.5546		8.47505	8.4701	9.29478	7.59514	11.7169
1.01674	1.06414	1.18043	1.11308	1.03614		2.55153	1.15152	1.05069	1.05126	2.47001		2.27205	2.14348	1.78536	2.38481	1.74034		6.60831	3.30483	8.58911	4.32691	4.186		8.63874	8.72372	8.19251	11.3979	13.4578		8.53038	8.45533	9.61657	7.65695	11.2851
1.01755	1.0646	1.19048	1.08769	1.03197		2.57441	1.13479	1.05566	1.0471	2.40356		2.27786	2.14821	1.77145	2.37313	1.72673		6.59631	3.18555	8.40528	4.15952	4.14085		8.61347	8.77054	8.33233	11.4273	13.4445		8.53199	8.45887	9.74357	8.07834	11.6123
1.01762	1.06649	1.19003	1.1071	1.03585		2.6068	1.1387	1.05116	1.04507	2.40511		2.28564	2.15977	1.76263	2.43612	1.71549		6.58097	3.28697	8.63753	4.01099	4.18207		8.56218	8.73858	8.13653	11.4254	13.4832		8.51562	8.45833	9.36627	8.02097	11.8079
1.01807	1.06507	1.17609	1.11164	1.03425		2.63436	1.15234	1.05262	1.03566	2.41189		2.29618	2.14492	1.75975	2.43016	1.71408		6.61431	3.24624	8.55767	4.10009	4.23182		8.36564	8.7396	8.10109	11.4714	13.4844		8.49206	8.45414	9.57659	7.77528	11.1535
1.02899	1.06429	1.17555	1.05135	1.03153		2.62505	1.15413	1.05527	1.05147	2.41758		2.29714	2.14301	1.76633	2.39211	1.71564		6.59989	3.29045	8.57567	4.25409	4.18307		8.45339	8.75927	8.12345	11.4238	13.4362		8.67717	8.43834	9.58424	8.06578	11.2278
1.01679	1.06649	1.16991	1.10919	1.0363		2.6309	1.14935	1.05465	1.05114	2.48764		2.30056	2.1561	1.77474	2.43071	1.73406		6.5978	3.2187	8.49799	4.26516	4.1753		8.44501	8.72667	8.11984	11.4387	13.3529		8.43119	8.40099	9.32245	7.87902	11.5374
1.02059	1.06562	1.16532	1.09428	1.03255		2.57016	1.13723	1.04693	1.04255	2.49219		2.29717	2.16505	1.77581	2.41301	1.71821		6.61838	3.27738	8.55504	4.06243	4.20446		8.58911	8.7112	8.11175	11.4014	13.3354		8.56543	8.42942	9.5914	8.00873	11.4077
1.02151	1.06395	1.16576	1.11952	1.02964		2.55708	1.14065	1.05184	1.03325	2.52106		2.31112	2.16596	1.78676	2.46104	1.70822		6.60401	3.3052	8.45465	4.48263	4.13243		8.40528	8.74115	8.06919	11.4745	13.3856		8.38856	8.41661	9.0568	7.65558	11.7272
1.02043	1.0644	1.16584	1.10202	1.03316		2.52731	1.1223	1.05588	1.04193	2.47829		2.31341	2.16945	1.81671	2.44891	1.73278		6.61748	3.33858	8.47338	4.45648	4.20094		8.63753	8.73043	8.11657	11.4996	13.3266		8.49306	8.42659	9.46573	7.938	10.9726
1.02239	1.06442	1.16206	1.08883	1.02992		2.55933	1.13247	1.05847	1.03917	2.49296		2.30191	2.17564	1.80094	2.44476	1.73525		6.61684	3.2524	8.59856	4.24799	4.09579		8.55767	8.70492	8.31865	11.4714	13.467		8.511	8.44205	9.08614	8.20862	10.7249
1.02116	1.06299	1.1577	1.11352	1.03978		2.54767	1.14027	1.06001	1.04367	2.52351		2.31778	2.18243	1.81132	2.45969	1.75357		6.61595	3.13207	8.5314	4.40488	4.18164		8.57567	8.73161	8.15436	11.4848	13.2853		8.46635	8.43377	9.30553	7.9504	11.196
1.01352	1.06225	1.16069	1.07854	1.03695		2.53865	1.11681	1.05816	1.03224	2.50609		2.31633	2.16739	1.83687	2.44293	1.74127		6.63172	3.25406	8.66287	3.96573	4.18455		8.49799	8.73192	8.09065	11.5076	13.3991		8.31803	8.43757	9.24641	7.91212	10.8398
1.02155	1.06464	1.16177	1.08972	1.03287		2.59765	1.11488	1.05659	1.03772	2.49886		2.31696	2.17167	1.82682	2.45033	1.73309		6.64159	3.14149	8.66246	4.08415	4.1759		8.55504	8.71497	8.05558	11.5311	13.3117		8.55988	8.43067	9.47942	7.7199	11.378
1.0154	1.06388	1.15869	1.08552	1.03445		2.62064	1.12312	1.04731	1.03585	2.50472		2.31834	2.15108	1.8454	2.41023	1.72528		6.63583	3.34278	8.69418	4.38059	4.14351		8.45465	8.70983	8.01734	11.5024	13.4288		8.2704	8.4317	9.40519	7.63135	11.157
1.01867	1.06212	1.15303	1.0658	1.02972		2.58877	1.11363	1.04779	1.04226	2.53575		2.32007	2.1589	1.84727	2.43657	1.74081		6.63284	3.43063	8.47316	4.23503	4.10138		8.47338	8.73259	8.04392	11.5428	13.331		8.13823	8.40533	9.51225	7.74559	11.1128
1.02444	1.0647	1.14862	1.11927	1.02977		2.62021	1.09836	1.05677	1.04112	2.54483		2.32267	2.17177	1.86073	2.45851	1.70367		6.60898	3.35168	8.58979	4.05815	4.14701		8.59856	8.72394	8.01939	11.5071	13.424		8.58022	8.42212	9.35471	7.92401	11.047
1.02002	1.06464	1.15224	1.09048	1.03248		2.62095	1.09563	1.04901	1.03937	2.53743		2.32885	2.16628	1.85156	2.46219	1.74225		6.6184	3.37388	8.53211	4.26641	4.13056		8.5314	8.73266	8.00753	11.5331	13.3942		8.33139	8.40578	9.56201	7.83889	11.2808
1.02575	1.06288	1.1553	1.14427	1.03058		2.66541	1.10998	1.03546	1.0456	2.5446		2.32179	2.16656	1.82986	2.46658	1.76445		6.63096	3.2782	8.45927	4.02581	4.0317		8.66287	8.75244	8.0172	11.5182	13.5145		8.3404	8.39366	9.27978	7.60144	11.4193
1.0191	1.06287	1.15619	1.12491	1.03884		2.67266	1.09929	1.05217	1.04316	2.52719		2.33519	2.17643	1.84814	2.49929	1.73937		6.62687	3.41273	8.56789	4.14621	4.0987		8.66246	8.75113	8.00114	11.4834	13.5379		8.15932	8.39128	9.20981	7.61118	11.2321
1.0188	1.06281	1.15553	1.11404	1.04144		2.63358	1.1002	1.05462	1.05824	2.52044		2.33442	2.1774	1.8432	2.45178	1.74666		6.63273	3.33756	8.63935	3.89285	4.03091		8.69418	8.78304	7.95984	11.4771	13.3618		8.48131	8.38144	9.41595	7.80252	11.441
1.01798	1.06057	1.14627	1.12229	1.04165		2.64134	1.10481	1.05293	1.05037	2.5141		2.34143	2.17812	1.81319	2.45437	1.79008		6.63698	3.33953	8.50937	4.06063	4.01776		8.47316	8.78901	7.96255	11.4551	13.2675		8.44932	8.37116	9.47734	7.85637	11.277
1.01885	1.06231	1.14391	1.10833	1.03851		2.66253	1.0869	1.05686	1.05679	2.49699		2.33777	2.19146	1.80212	2.49109	1.73196		6.64079	3.19005	8.23433	4.36804	4.06514		8.58979	8.78308	7.94554	11.4267	13.2246		8.39504	8.36823	9.35824	7.98249	10.8403
1.0162	1.06479	1.14627	1.10774	1.03566		2.68894	1.10621	1.06065	1.05053	2.48548		2.34567	2.19852	1.82587	2.44824	1.77354		6.64424	3.2915	8.28618	4.083	4.09398		8.53211	8.76293	7.9078	11.4112	13.3306		8.42458	8.3714	9.47573	7.98144	11.1522
1.01554	1.06431	1.14148	1.09701	1.0351		2.65022	1.09353	1.06914	1.03869	2.48244		2.3479	2.19907	1.82218	2.49517	1.76239		6.63621	3.34779	8.52201	3.92397	4.10055		8.45927	8.79355	7.91832	11.3554	13.3373		8.27858	8.36825	9.13084	7.71202	11.1391
1.01944	1.06194	1.1452	1.10219	1.04397		2.74665	1.09117	1.06827	1.04876	2.47369		2.35802	2.20161	1.81715	2.49929	1.72707		6.6278	3.44971	8.37958	4.21591	4.14034		8.56789	8.74635	7.9383	11.3306	13.4717		8.31213	8.37558	9.06547	7.82066	11.0797
1.01605	1.06406	1.13713	1.11333	1.03599		2.6219	1.10554	1.06978	1.04165	2.44283		2.36361	2.2057	1.82311	2.506	1.73335		6.64169	3.37374	8.59288	4.44991	4.01957		8.63935	8.74835	7.88791	11.3574	13.3316		8.52508	8.38432	9.16669	7.85222	11.3218
1.02472	1.06425	1.14277	1.10555	1.03434		2.60641	1.10019	1.05761	1.04333	2.44675		2.36595	2.19298	1.81844	2.48796	1.72234		6.64034	3.33166	8.61702	4.28647	3.93049		8.50937	8.73502	7.8851	11.3239	13.2928		8.49517	8.37536	9.01819	7.5891	11.2846
1.01681	1.06339	1.13988	1.10434	1.03516		2.66226	1.10819	1.06922	1.03098	2.49928		2.36348	2.20032	1.80754	2.49339	1.75858		6.6437	3.22319	8.46113	4.39834	4.01005		8.23433	8.7313	7.90344	11.2751	13.3326		8.42323	8.36384	9.31122	7.70507	10.8358
1.02096	1.06395	1.13931	1.13115	1.02866		2.62084	1.08384	1.06707	1.05643	2.46132		2.3698	2.18508	1.84168	2.47789	1.72436		6.65351	3.27317	8.36235	3.8783	4.04013		8.28618	8.73629	7.87992	11.2868	13.1983		8.61159	8.36353	9.49508	7.73031	11.1721
1.00805	1.06375	1.13462	1.09077	1.03536		2.64138	1.09697	1.06587	1.04312	2.49168		2.37947	2.22	1.85677	2.48428	1.74081		6.63862	3.24954	8.53135	4.03842	3.96389		8.52201	8.73556	7.8875	11.2499	13.3428		8.62755	8.37368	9.37447	7.57611	11.2129
1.02467	1.06332	1.14538	1.06336	1.03934		2.61928	1.08267	1.07049	1.04336	2.53477		2.37665	2.21965	1.84262	2.52276	1.75224		6.62452	3.37359	8.45254	3.94319	4.02163		8.37958	8.69178	7.88271	11.251	13.3912		8.70742	8.34185	9.31147	7.7179	10.9927
1.02266	1.06318	1.1343	1.1048	1.04803		2.65031	1.08373	1.06993	1.03654	2.50154		2.38421	2.20269	1.82258	2.53193	1.76146		6.62474	3.39819	8.48344	4.16271	3.99738		8.59288	8.67892	7.84547	11.2488	13.5126		8.61645	8.33688	9.46198	7.99582	10.7531
1.01872	1.06585	1.13805	1.12762	1.0393		2.6066	1.09505	1.06483	1.04764	2.48136		2.37409	2.22012	1.83343	2.52435	1.77625		6.64344	3.26053	8.58791	3.92804	4.10557		8.61702	8.69777	7.85053	11.2758	13.3823		8.6437	8.33761	9.38216	7.57228	10.7613
1.02421	1.0621	1.14373	1.08095	1.02755		2.6294	1.09096	1.06217	1.04621	2.56531		2.38159	2.20765	1.80936	2.53092	1.74086		6.64078	3.47798	8.34195	4.23581	4.06715		8.46113	8.69658	7.85939	11.2325	13.5231		8.76227	8.34499	9.3248	7.83757	10.947
1.02469	1.06316	1.13184	1.03978	1.04007		2.61467	1.08558	1.06984	1.04666	2.564		2.3745	2.23286	1.81406	2.51721	1.77141		6.62927	3.36346	8.30611	4.19557	4.04335		8.36235	8.66863	7.8295	11.2273	13.3762		8.74358	8.32276	9.38592	8.00207	10.7557
1.02194	1.06499	1.1307	1.0775	1.03076		2.66124	1.08549	1.06334	1.04471	2.59357		2.37814	2.19826	1.83383	2.5188	1.75134		6.6366	3.32226	8.4954	4.24798	3.97216		8.53135	8.65229	7.83753	11.2123	13.4841		8.7049	8.32955	9.5024	7.9973	10.8218
1.01473	1.06441	1.12651	1.1038	1.03636		2.66312	1.08362	1.06603	1.03716	2.55353		2.39396	2.23578	1.8295	2.5148	1.75846		6.64531	3.40999	8.56861	4.28282	3.98014		8.45254	8.70693	7.84509	11.1678	13.382		8.79802	8.32877	9.07381	7.99051	10.7057
1.01827	1.06284	1.13204	1.14809	1.02653		2.67962	1.10237	1.06342	1.03666	2.54949		2.38682	2.22645	1.81715	2.52458	1.76967		6.65934	3.52344	8.45199	4.41873	3.92597		8.48344	8.62978	7.81541	11.1696	13.3585		8.66678	8.33829	9.20467	7.93584	10.6694
1.02208	1.06391	1.12281	1.11619	1.04018		2.64194	1.09496	1.0602	1.045	2.54295		2.39409	2.25169	1.82394	2.53733	1.76818		6.62924	3.5869	8.5651	4.1254	3.95926		8.58791	8.6383	7.81233	11.184	13.3329		8.73194	8.32325	9.53179	7.91224	10.7087
1.02042	1.06352	1.12357	1.08555	1.03458		2.61886	1.10388	1.06012	1.04314	2.5473		2.38864	2.2315	1.8001	2.54088	1.80761		6.65626	3.31209	8.50466	4.38093	3.92924		8.34195	8.68009	7.81474	11.1323	13.3368		8.77982	8.33112	9.45018	7.95959	10.6696
1.02242	1.06194	1.11611	1.10616	1.03222		2.61682	1.09815	1.05648	1.04329	2.54685		2.39663	2.22686	1.8048	2.5163	1.80033		6.6491	3.47753	8.46101	4.3148	3.95864		8.30611	8.63707	7.78122	11.1533	13.1846		8.7818	8.32237	9.16101	7.78526	10.8378
1.0234	1.06191	1.12029	1.09816	1.02577		2.625	1.08213	1.06589	1.04413	2.59678		2.39532	2.25417	1.81442	2.55888	1.78943		6.64367	3.56978	8.52492	4.45434	4.00885		8.4954	8.58899	7.7881	11.1448	13.493		8.7299	8.3156	9.22973	7.61046	10.6507
1.02144	1.06173	1.12041	1.1045	1.02595		2.66566	1.07594	1.06627	1.04689	2.57821		2.39226	2.24971	1.83296	2.54239	1.8187		6.6588	3.34731	8.59452	4.27226	3.94705		8.56861	8.66503	7.78802	11.1069	13.3552		8.75367	8.30399	9.46865	7.70563	10.4612
1.01075	1.06166	1.11669	1.0843	1.03106		2.71668	1.09551	1.06112	1.05217	2.61569		2.3965	2.24856	1.83204	2.55712	1.8476		6.64535	3.56198	8.70169	3.98904	4.09878		8.45199	8.63439	7.78317	11.1263	13.3864		8.81942	8.29798	9.42784	7.96372	10.652
1.01667	1.06198	1.11296	1.09424	1.03171		2.69358	1.08609	1.07287	1.04556	2.61798		2.39132	2.24595	1.8288	2.52847	1.82326		6.64762	3.55477	8.36467	4.15801	3.98255		8.5651	8.62587	7.75562	11.1091	13.4934		8.815	8.28172	9.40814	7.81369	10.6653
1.01474	1.06368	1.10876	1.0917	1.03016		2.6836	1.07779	1.06797	1.04473	2.61413		2.39124	2.26332	1.84561	2.53996	1.81493		6.66684	3.4873	8.39628	3.96038	4.03396		8.50466	8.65052	7.77369	11.0577	13.3656		8.8654	8.27162	9.19822	7.80802	10.5597
1.02337	1.06204	1.11179	1.11246	1.02668		2.67331	1.09394	1.07377	1.04319	2.59858		2.39049	2.2697	1.86141	2.5493	1.81717		6.65182	3.52854	8.31091	4.12529	3.9211		8.46101	8.61691	7.77876	11.0491	13.3332		8.77644	8.27952	9.42229	7.82602	10.9387
1.01577	1.06097	1.10646	1.07604	1.02938		2.65078	1.1078	1.07456	1.04137	2.59649		2.39042	2.26356	1.84443	2.54828	1.78622		6.65594	3.51248	8.34473	4.147	3.94929		8.52492	8.60127	7.74557	11.0981	13.4558		8.9588	8.27468	9.58623	8.08253	10.3098
1.02048	1.06317	1.10559	1.08598	1.03365		2.67701	1.10781	1.07302	1.04587	2.54854		2.39994	2.28011	1.83671	2.61137	1.83746		6.64353	3.65934	8.4873	4.08716	4.01544		8.59452	8.64397	7.75746	11.0259	13.3804		8.77839	8.26839	9.54657	7.82606	10.6602
1.02456	1.06032	1.11011	1.10616	1.02344		2.69274	1.10456	1.07314	1.04632	2.57048		2.3876	2.24822	1.82376	2.58397	1.82347		6.65649	3.65286	8.57328	3.97263	4.08952		8.70169	8.64348	7.75724	11.046	13.3488		8.83328	8.26128	9.36807	7.90515	10.7256
1.02016	1.06077	1.11203	1.08542	1.0252		2.64712	1.10078	1.07169	1.04127	2.59089		2.39492	2.2684	1.8187	2.57757	1.82764		6.65437	3.62014	8.44524	4.19054	4.01798		8.36467	8.60699	7.72318	11.0338	13.3577		8.79969	8.27716	9.60584	7.91483	10.5862
1.01739	1.06263	1.10419	1.07692	1.02127		2.6609	1.09746	1.08276	1.04931	2.5961		2.39486	2.26004	1.81163	2.56264	1.79649		6.65591	3.68514	8.27299	4.13369	4.01751		8.39628	8.62813	7.72954	11.0168	13.378		8.96526	8.2687	9.35614	8.08394	10.3594
1.02668	1.06119	1.10178	1.1158	1.03244		2.69945	1.08104	1.08006	1.03745	2.61772		2.39922	2.23222	1.81538	2.58317	1.81903		6.64482	3.55865	8.63065	4.04711	3.98395		8.31091	8.61407	7.74849	10.9813	13.5006		8.86353	8.26556	9.47355	7.9927	10.4605
1.01151	1.05991	1.09983	1.0921	1.02355		2.63174	1.10201	1.06809	1.04633	2.7256		2.40405	2.25042	1.81282	2.56446	1.82139		6.65492	3.76665	8.49821	4.02991	3.92442		8.34473	8.58199	7.6938	11.0848	13.3495		8.8806	8.25243	9.38494	7.78945	10.6123
1.02341	1.05854	1.10109	1.07881	1.02974		2.67327	1.10313	1.07506	1.03785	2.71843		2.40367	2.23812	1.82077	2.58091	1.84074		6.64792	3.69306	8.4186	4.09667	3.92963		8.4873	8.63067	7.69753	11.0371	13.3676		8.8556	8.27658	9.49281	8.01486	10.7101
1.02434	1.06141	1.10353	1.06497	1.0247		2.65646	1.09574	1.07682	1.04814	2.70102		2.41949	2.26669	1.82739	2.56921	1.82613		6.64614	3.78048	8.56437	4.30393	4.01792		8.57328	8.61629	7.70209	11.0301	13.3722		8.85849	8.24382	9.53319	7.68846	10.5415
1.0172	1.06069	1.09564	1.1224	1.02568		2.69288	1.07893	1.08263	1.04095	2.65298		2.42693	2.24952	1.82379	2.60527	1.83493		6.62746	3.68842	8.56175	4.21532	4.04647		8.44524	8.55435	7.69728	11.0665	13.4546		8.82823	8.23922	9.32742	7.80443	10.4094
1.01699	1.06062	1.10206	1.07199	1.02481		2.68086	1.11135	1.07211	1.04532	2.63933		2.42396	2.24797	1.84847	2.59162	1.82959		6.61622	3.76465	8.54676	4.05918	4.0385		8.27299	8.58848	7.68412	11.0691	13.4668		8.98655	8.24518	9.40757	7.96262	10.5475
1.02176	1.06187	1.09642	1.10034	1.03718		2.71799	1.11398	1.08248	1.0457	2.63346		2.42822	2.25984	1.84609	2.6021	1.81854		6.62706	3.72265	8.43753	3.84872	4.14632		8.63065	8.59709	7.68992	11.03	13.1863		8.92472	8.24871	9.27102	7.65131	10.5468
1.02114	1.05851	1.09684	1.0697	1.03203		2.68624	1.1159	1.07972	1.04459	2.63069		2.42718	2.25869	1.8366	2.60959	1.80652		6.63529	3.61042	8.4465	4.29898	4.16583		8.49821	8.55458	7.66358	11.0684	13.156		9	8.23804	9.60811	7.77189	10.2603
1.02595	1.06364	1.10116	1.1041	1.02645		2.71308	1.10452	1.08025	1.04461	2.64483		2.42869	2.26875	1.83063	2.60274	1.86435		6.63324	3.77354	8.54607	3.78213	4.14738		8.4186	8.59557	7.62511	11.0392	13.3312		8.82604	8.23155	9.52309	7.62642	10.6089
1.01647	1.06337	1.09991	1.09866	1.02558		2.71222	1.10651	1.07718	1.03294	2.67634		2.431	2.26998	1.85649	2.61027	1.86881		6.64076	3.84718	8.47642	4.05117	4.14949		8.56437	8.57977	7.65914	11.0273	13.3163		8.8411	8.22617	9.52463	7.67445	10.3281
1.02086	1.0609	1.09489	1.09618	1.03464		2.60255	1.1284	1.07202	1.04641	2.64111		2.43704	2.25678	1.85805	2.59681	1.90109		6.66236	3.83275	8.52191	4.04579	4.13205		8.56175	8.54681	7.63382	11.0504	13.1766		8.89202	8.22046	9.64964	7.80688	10.7264
1.01977	1.06006	1.09975	1.11759	1.02832		2.64491	1.11875	1.07563	1.04719	2.62379		2.44115	2.24319	1.85202	2.60439	1.8771		6.65262	3.96157	8.49688	4.20883	4.1461		8.54676	8.59143	7.61085	11.0325	13.3219		8.80393	8.21853	9.60116	7.95511	10.2143
1.01783	1.06335	1.09443	1.06375	1.02649		2.65784	1.11337	1.07342	1.03662	2.62955		2.44427	2.26956	1.87726	2.63096	1.86961		6.66814	3.97317	8.44016	4.01305	4.13422		8.43753	8.56778	7.61937	11.0027	13.455		8.9054	8.21776	9.53888	7.88754	10.6029
1.02804	1.06274	1.10118	1.07681	1.03338		2.624	1.11524	1.0812	1.04639	2.57594		2.45423	2.28783	1.87804	2.60075	1.88411		6.65952	3.85227	8.32379	4.19437	4.25772		8.4465	8.54118	7.58446	11.0735	13.2469		8.85439	8.21024	9.65455	7.85286	10.6494
1.01478	1.05958	1.09932	1.09939	1.031		2.68622	1.11976	1.0722	1.03276	2.64766		2.46267	2.27389	1.87014	2.6442	1.8706		6.64374	3.88524	8.42133	3.94586	4.22687		8.54607	8.60741	7.56262	11.1003	13.3874		8.90364	8.20691	9.71257	7.90642	10.4542
1.02431	1.06139	1.11137	1.11539	1.02754		2.75991	1.11565	1.07684	1.04066	2.69965		2.46659	2.27688	1.86156	2.59081	1.85553		6.66156	3.80674	8.39818	4.01317	4.1904		8.47642	8.57568	7.56842	11.0591	13.2487		8.88215	8.22114	9.47155	7.6806	10.6339
1.01853	1.05985	1.10464	1.1028	1.03038		2.67801	1.11759	1.07271	1.03439	2.63489		2.45915	2.28449	1.8767	2.60567	1.89477		6.65549	3.80824	8.4769	3.87115	4.31112		8.52191	8.54024	7.59097	11.0724	13.2191		8.75636	8.215	9.49472	7.88244	10.3836
1.02127	1.06017	1.10621	1.09609	1.0377		2.72055	1.10457	1.07224	1.03905	2.61739		2.46455	2.30416	1.87571	2.63034	1.87405		6.65737	3.86904	8.4667	4.13448	4.26797		8.49688	8.56965	7.56695	11.1091	13.3485		8.80749	8.19667	9.15563	7.83265	10.3555
1.02496	1.06083	1.10429	1.13064	1.03266		2.7266	1.10812	1.08939	1.04473	2.59922		2.47443	2.28908	1.87188	2.57811	1.87191		6.65027	3.90605	8.55046	4.29079	4.22526		8.44016	8.56327	7.56588	11.0801	13.3742		8.77459	8.17607	9.39784	7.88762	10.6544
1.01709	1.05933	1.10999	1.09187	1.05272		2.71709	1.12685	1.07809	1.03668	2.62424		2.47607	2.2959	1.84267	2.61959	1.82283		6.67491	4.02944	8.36689	3.93182	4.30535		8.32379	8.53356	7.55146	11.1256	13.2317		8.97755	8.18466	9.34826	8.13959	10.5205
1.01963	1.0579	1.10621	1.09071	1.04061		2.70224	1.11283	1.07486	1.04728	2.63438		2.47912	2.27161	1.84027	2.61985	1.85391		6.66786	3.91561	8.42982	3.81939	4.20103		8.42133	8.57178	7.55779	11.1237	13.2173		8.89571	8.18668	9.40076	7.90527	10.2855
1.02423	1.05678	1.10285	1.09664	1.03996		2.71299	1.10446	1.08438	1.03579	2.6514		2.48127	2.28339	1.84173	2.61336	1.84161		6.65689	3.99129	8.37539	4.15865	4.28041		8.39818	8.56767	7.53803	11.1375	13.2159		8.76653	8.18226	9.56082	7.81286	10.5461
1.01975	1.06016	1.10453	1.09611	1.03419		2.69685	1.11894	1.08512	1.04699	2.6445		2.48451	2.30896	1.86148	2.67851	1.86368		6.64161	3.85602	8.44751	4.24455	4.30651		8.4769	8.50802	7.54509	11.1318	13.1939		8.84873	8.19975	9.56093	7.94283	10.4621
1.02492	1.05954	1.11218	1.12042	1.0475		2.73725	1.13565	1.08106	1.03779	2.5981		2.49919	2.30043	1.8562	2.65643	1.86536		6.63513	3.77098	8.50642	4.35835	4.31534		8.4667	8.55009	7.55771	11.1862	13.2401		8.78231	8.18407	9.24917	8.02968	10.2917
1.01247	1.05899	1.1162	1.11261	1.04712		2.72135	1.1212	1.08102	1.0466	2.61636		2.49929	2.29705	1.85485	2.67149	1.8572		6.64166	4.01555	8.3227	4.18222	4.34646		8.55046	8.57309	7.53423	11.1383	13.3792		8.8081	8.1736	9.48691	8.37774	10.3369
1.01981	1.0597	1.11251	1.08922	1.04404		2.68581	1.12436	1.0799	1.03333	2.61631		2.49803	2.30036	1.85672	2.65496	1.86123		6.65808	3.97225	8.3438	4.00411	4.28492		8.36689	8.48195	7.52732	11.1711	13.194		8.79116	8.17034	9.33791	8.15236	10.3449
1.02519	1.05974	1.11356	1.10664	1.03946		2.75641	1.13536	1.07176	1.04359	2.61176		2.50528	2.28429	1.86597	2.67992	1.86533		6.66784	4.02312	8.32298	4.1546	4.20037		8.42982	8.55859	7.5127	11.1372	13.3378		8.8081	8.15652	9.56142	7.80874	10.299
1.02246	1.0585	1.12842	1.08626	1.04432		2.69723	1.1205	1.07998	1.04591	2.63444		2.50303	2.31747	1.89901	2.69427	1.88573		6.66212	4.02606	8.32569	4.27643	4.2751		8.37539	8.57638	7.50721	11.1266	13.2085		8.79138	8.15767	9.25403	8.29522	10.2332
1.01976	1.05876	1.11598	1.10388	1.04415		2.67084	1.12184	1.07183	1.04473	2.67481		2.50596	2.30399	1.89714	2.69044	1.88381		6.65121	3.92018	8.2559	4.22391	4.24946		8.44751	8.49484	7.49683	11.1824	13.2017		8.77852	8.14808	9.36487	8.23151	9.94472
1.01831	1.05845	1.11928	1.07105	1.04358		2.6922	1.12228	1.07468	1.04459	2.66643		2.50254	2.30156	1.91029	2.67628	1.83851		6.66042	3.81449	8.43165	4.23043	4.2109		8.50642	8.54267	7.49479	11.1787	13.1989		8.77146	8.18139	9.29071	8.06494	10.0339
1.01983	1.05712	1.12422	1.02206	1.0303		2.74192	1.11743	1.07995	1.04825	2.69311		2.49952	2.3076	1.90536	2.66955	1.8445		6.66183	3.88802	8.58302	4.21909	4.15356		8.3227	8.57311	7.48076	11.1498	13.149		8.73074	8.16947	9.40888	8.31001	10.0066
1.01447	1.05653	1.1181	1.11023	1.03651		2.71445	1.11183	1.08353	1.04269	2.66973		2.51566	2.31296	1.94474	2.66652	1.88176		6.67487	3.95262	8.24521	4.16951	4.25813		8.3438	8.51526	7.47904	11.164	13.1521		8.93692	8.16924	9.21549	8.09924	10.4137
1.01836	1.05742	1.11991	1.09832	1.02941		2.70093	1.11058	1.08774	1.04585	2.69154		2.515	2.29767	1.94953	2.70022	1.91219		6.67268	4.16514	8.41869	4.31657	4.20599		8.32298	8.51652	7.48156	11.1264	13.1182		8.77919	8.17156	9.26834	8.18934	10.1349
1.02188	1.05816	1.12302	1.10783	1.03485		2.67763	1.1184	1.08502	1.03752	2.76347		2.51565	2.33001	1.92394	2.68528	1.87044		6.6742	4.04129	8.31646	4.1605	4.20069		8.32569	8.56159	7.42114	11.1049	13.2914		8.86765	8.1532	9.28565	8.44531	10.324
1.02067	1.05806	1.11422	1.10166	1.03334		2.72324	1.11748	1.08343	1.05589	2.79246		2.51455	2.31788	1.91429	2.7121	1.86316		6.66131	4.08476	8.27678	4.12603	4.19016		8.2559	8.49776	7.46029	11.1185	13.2845		8.85972	8.15735	9.16085	8.21796	9.85728
1.02239	1.05691	1.11038	1.09553	1.03534		2.66799	1.11612	1.07675	1.04592	2.77675		2.52329	2.31553	1.90101	2.671	1.87369		6.65103	4.16814	8.45995	4.13231	4.25016		8.43165	8.555	7.4516	11.1258	13.1254		8.86368	8.14682	9.14746	8.02326	10.1809
1.02467	1.0549	1.11072	1.09302	1.03292		2.73453	1.12907	1.06932	1.0377	2.763		2.5251	2.31477	1.89236	2.71385	1.83378		6.67226	3.99973	8.30413	4.1087	4.12797		8.58302	8.56243	7.4616	11.0551	13.2425		8.73873	8.13267	9.20703	8.05726	10.2068
1.02037	1.05717	1.1106	1.07893	1.03964		2.70961	1.14032	1.07122	1.06291	2.76498		2.52873	2.33357	1.90418	2.70639	1.85519		6.66718	3.99304	8.26412	3.9332	4.24823		8.24521	8.4645	7.45744	11.0913	13.2239		8.68741	8.13201	9.2332	8.34097	10.1635
1.01563	1.05845	1.12311	1.10953	1.03718		2.69561	1.14143	1.07531	1.04463	2.71654		2.526	2.34206	1.93576	2.68266	1.85401		6.65385	4.1523	8.35342	4.03148	4.16617		8.41869	8.53719	7.459	11.0573	13.0852		8.80515	8.12844	9.16131	8.09443	10.2688
1.01937	1.05617	1.12292	1.11196	1.03247		2.68056	1.13829	1.07638	1.04771	2.8683		2.52661	2.33735	1.9241	2.69941	1.90602		6.65732	3.99608	8.48046	4.16139	4.16996		8.31646	8.53111	7.46744	11.0437	13.0914		8.8702	8.1244	9.2758	8.31874	10.2807
1.00983	1.05324	1.12617	1.09497	1.04059		2.72972	1.13437	1.08217	1.04343	2.91865		2.5351	2.3297	1.92143	2.64057	1.90503		6.66716	4.13833	8.34449	3.827	4.23343		8.27678	8.48303	7.44266	11.0521	12.9248		8.81684	8.12007	9.18529	8.27425	10.2249
1.01878	1.05514	1.11764	1.07469	1.03395		2.71952	1.13367	1.07439	1.03643	2.87526		2.53632	2.33094	1.92551	2.69083	1.88054		6.68169	4.06351	8.35545	4.16867	4.24501		8.45995	8.5089	7.44492	11.032	13.2312		8.78384	8.11734	9.31194	8.12102	10.0698
1.01697	1.05528	1.11391	1.11525	1.0399		2.73239	1.13997	1.07473	1.04482	2.82529		2.53355	2.33018	1.93642	2.6923	1.84444		6.68717	4.20806	8.47413	4.17174	4.19455		8.30413	8.52261	7.41336	10.9997	13.052		8.70056	8.12376	9.27372	8.04538	10.1548
1.01601	1.0518	1.12138	1.13029	1.04058		2.75111	1.12889	1.06928	1.04706	2.81441		2.53262	2.32237	1.93209	2.72535	1.88994		6.68058	4.01422	8.43791	3.96641	4.26032		8.26412	8.44253	7.4341	11.0251	13.3588		8.7243	8.10645	9.24402	8.18201	9.89809
1.02215	1.05441	1.12115	1.08162	1.0435		2.72967	1.1405	1.06882	1.03595	2.78692		2.54013	2.32889	1.93079	2.70059	1.90453		6.6514	4.09259	8.43406	4.20108	4.1443		8.35342	8.46543	7.41428	10.9358	13.172		8.86152	8.10317	9.18818	8.01442	9.91317
1.02112	1.05612	1.12227	1.08915	1.03859		2.80354	1.13304	1.06666	1.04767	2.79603		2.53988	2.32192	1.95787	2.71118	1.8988		6.67206	4.18438	8.31713	4.37684	4.25964		8.48046	8.496	7.4339	10.8572	13.0215		8.93978	8.10307	9.11806	7.89771	9.90271
1.01827	1.0556	1.12186	1.09632	1.03819		2.85674	1.13679	1.07104	1.03568	2.81332		2.54655	2.33209	1.94636	2.69924	1.88675		6.6745	4.11667	8.36051	4.46888	4.24155		8.34449	8.44294	7.40708	10.9234	13.177		8.81727	8.10423	9.17521	7.98719	10.0581
1.01816	1.05637	1.12541	1.09145	1.04469		2.75891	1.12428	1.07641	1.05257	2.77891		2.55566	2.35465	1.92442	2.71651	1.87774		6.66205	4.16305	8.47375	4.08919	4.19846		8.35545	8.45164	7.42739	10.8828	13.146		8.81136	8.11004	9.08557	8.11379	10.1538
1.01541	1.05586	1.1154	1.07969	1.03967		2.76596	1.13523	1.06956	1.03341	2.76817		2.55773	2.3295	1.95016	2.74879	1.84318		6.66723	4.14347	8.47003	4.0545	4.15281		8.47413	8.50588	7.41906	10.8665	13.1359		8.80389	8.10642	9.14497	8.01397	10.0493
1.01361	1.05543	1.12004	1.08458	1.04356		2.77191	1.13314	1.06462	1.04673	2.71899		2.56661	2.34084	1.95992	2.72132	1.85057		6.63682	4.14556	8.42154	4.21592	4.20722		8.43791	8.45529	7.41402	10.8736	13.1168		8.78818	8.0868	9.29756	8.02159	9.96202
1.01855	1.05544	1.11517	1.10817	1.04348		2.74955	1.14049	1.06144	1.05614	2.79182		2.55206	2.35452	1.94632	2.72615	1.88053		6.65808	4.2616	8.54772	4.21748	4.17976		8.43406	8.45547	7.43839	10.9079	12.9744		8.94079	8.08559	9.19092	7.90714	10.1075
1.01965	1.05659	1.11528	1.0807	1.04578		2.81655	1.15029	1.0609	1.03733	2.77727		2.57009	2.32013	1.94981	2.74533	1.88378		6.67805	4.10219	8.43988	4.0018	4.06069		8.31713	8.50689	7.4306	10.8874	13.0861		8.95416	8.08162	9.08134	7.91683	9.89719
1.01649	1.05602	1.10792	1.11816	1.04073		2.78787	1.14815	1.06004	1.03755	2.77179		2.57386	2.34823	1.94717	2.08273	1.90411		6.68703	4.32559	8.49888	4.12998	4.15472		8.36051	8.44278	7.3872	10.8781	12.9582		8.86313	8.07059	9.22166	8.17573	10.0694
1.01176	1.05334	1.12499	1.10608	1.03975		2.75402	1.14614	1.05242	1.04437	2.7653		2.57302	2.35372	1.96217	1.81802	1.92314		6.65952	4.35541	8.38729	4.15776	4.08897		8.47375	8.42328	7.3981	10.9001	13.1289		8.85801	8.08541	9.20514	7.81285	9.67298
1.01791	1.0555	1.12258	1.09286	1.04284		2.76683	1.15411	1.06042	1.03606	2.7564		2.58133	2.34879	1.95654	1.81437	1.89666		6.66671	4.25612	8.42486	4.24054	3.98675		8.47003	8.45913	7.39864	10.8703	13.1062		8.95561	8.0767	9.28493	8.10323	10.0123
1.01991	1.05432	1.12356	1.09801	1.04347		2.71144	1.14586	1.0538	1.0535	2.81059		2.58103	2.37134	1.95336	1.79873	1.91525		6.67093	4.28226	8.46759	3.84992	4.08994		8.42154	8.44351	7.36216	10.8855	13.0805		8.91748	8.07226	9.0994	7.95591	9.56208
1.02051	1.05526	1.12152	1.08776	1.04005		2.77263	1.13959	1.0615	1.04637	2.80445		2.58282	2.36309	1.95295	1.80659	1.92986		6.67971	4.25073	8.30222	3.954	4.09575		8.54772	8.4437	7.36511	10.9167	13.0655		8.92998	8.06697	9.1101	7.8437	9.93503
1.01579	1.0529	1.12571	1.07868	1.04084		2.719	1.13683	1.06403	1.04551	2.83587		2.59473	2.39168	1.96668	1.82783	1.91755		6.66486	4.35987	8.46395	3.86259	4.09801		8.43988	8.46229	7.36142	10.887	13.1861		8.83405	8.06045	9.26457	7.77749	9.93643
1.01733	1.05528	1.13037	1.07522	1.03763		2.69678	1.1415	1.04382	1.04861	2.82967		2.59307	2.38863	1.9794	1.82816	1.89591		6.67128	4.196	8.45571	3.88877	4.0196		8.49888	8.42179	7.34098	10.8804	13.0444		8.9074	8.05123	9.15207	7.71877	9.98278
1.01675	1.05292	1.1428	1.09653	1.03884		2.69664	1.13721	1.06156	1.03386	2.79396		2.59781	2.36246	1.985	1.8164	1.89304		6.64878	4.10743	8.33704	3.87966	4.12203		8.38729	8.43483	7.34229	10.9166	13.0258		8.835	8.04525	9.21622	7.91576	10.124
1.01902	1.05436	1.15788	1.08519	1.03087		2.71553	1.15112	1.05874	1.04557	2.77798		2.61145	2.37938	1.96734	1.8268	1.88694		6.66668	4.25261	8.38189	3.9311	4.14079		8.42486	8.47108	7.33632	10.8895	12.8595		9.00107	8.04062	9.20105	7.8734	9.52698
1.01367	1.05433	1.15406	1.0915	1.03698		2.67368	1.16149	1.05431	1.03776	2.76725		2.61765	2.3849	1.94296	1.8183	1.91159		6.66426	4.38701	8.39017	4.28417	4.18591		8.46759	8.41447	7.34616	10.8788	12.9789		8.86107	8.04278	9.22542	7.90411	9.72711
1.0259	1.0545	1.15098	1.10586	1.0415		2.70541	1.1636	1.05083	1.04754	2.78066		2.62486	2.36932	1.9264	1.81928	1.87275		6.65694	4.29416	8.27275	4.28456	4.16603		8.30222	8.42648	7.31925	10.9327	13.0166		8.93315	8.03883	9.17171	8.07616	10.0868
1.02517	1.05612	1.15159	1.08651	1.04264		2.72875	1.16736	1.04293	1.04005	2.80534		2.61893	2.38738	1.91789	1.82943	1.9182		6.65235	4.15164	8.37337	4.15855	4.21103		8.46395	8.48049	7.32955	10.8744	12.9864		8.93217	8.02854	9.15248	8.07616	9.96905
1.01306	1.05667	1.15517	1.07166	1.04964		2.67067	1.15806	1.04957	1.03118	2.9041		2.62695	2.37763	1.89295	1.83501	1.94684		6.65641	4.23398	8.38493	3.94391	4.25551		8.45571	8.41261	7.32756	10.8929	12.9879		8.82557	8.0321	9.17289	7.9455	9.84409
1.01924	1.05543	1.15281	1.11173	1.03978		2.67682	1.18192	1.05397	1.03832	2.86499		2.63252	2.38146	1.89113	1.82875	1.93527		6.64717	4.1934	8.54305	4.08356	4.23407		8.33704	8.41227	7.31141	10.8815	13.1179		8.89197	8.0195	9.18003	7.67356	9.77246
1.01991	1.05429	1.1528	1.10766	1.04786		2.64318	1.17124	1.04894	1.03906	2.85186		2.6453	2.40398	1.90454	1.82639	1.91007		6.65698	4.33029	8.29448	3.99093	4.25259		8.38189	8.47916	7.30834	10.8347	12.9407		8.78858	8.02905	9.22302	8.00056	9.62808
1.01518	1.05159	1.14375	1.08698	1.0433		2.67877	1.17758	1.04849	1.03927	2.88098		2.64065	2.39317	1.91301	1.80954	1.94677		6.66089	4.26143	8.44719	4.14904	4.25246		8.39017	8.42159	7.30708	10.8314	12.9665		8.93578	8.03623	9.35215	7.8038	9.73602
1.02358	1.0546	1.14413	1.06388	1.05237		2.6482	1.1865	1.05061	1.0516	2.83337		2.63224	2.40162	1.91071	1.84302	1.956		6.63506	4.44418	8.35176	4.31247	4.25114		8.27275	8.39325	7.30254	10.8478	12.9205		8.84543	8.01449	9.287	8.23435	9.62154
1.01276	1.05245	1.14293	1.06465	1.0552		2.6379	1.16191	1.04964	1.04191	2.84572		2.64724	2.4125	1.90615	1.85288	1.94591		6.64145	4.27677	8.43144	4.09905	4.25254		8.37337	8.44617	7.29398	10.8146	12.782		8.80168	7.9957	9.14267	8.14314	9.7438
1.01284	1.05213	1.14644	1.09368	1.05602		2.70009	1.15772	1.05033	1.03228	2.89533		2.64665	2.40572	1.92263	1.82912	1.93896		6.64565	4.39505	8.38475	3.94516	4.26538		8.38493	8.41342	7.29131	10.7601	12.9423		8.80067	7.99097	9.31055	8.13674	9.75891
1.0234	1.0529	1.1471	1.08422	1.05143		2.71714	1.16128	1.04805	1.041	2.85756		2.66332	2.38338	1.95216	1.84116	1.91005		6.67353	4.38629	8.31286	4.19519	4.27153		8.54305	8.38661	7.27708	10.8454	12.9022		8.97518	7.98334	9.24379	8.13267	9.75892
1.01096	1.05359	1.14826	1.08738	1.05089		2.74302	1.15378	1.03335	1.05244	2.86467		2.65656	2.40557	1.94566	1.8566	1.93976		6.67437	4.40143	8.31808	3.98082	4.29298		8.29448	8.4474	7.26361	10.801	12.9039		8.98789	7.95784	9.27208	8.22975	9.90137
1.0179	1.05255	1.15058	1.09421	1.0469		2.7495	1.15662	1.0467	1.03962	2.85924		2.66851	2.44037	1.92866	1.85145	1.96004		6.65546	4.17594	8.3164	3.87063	4.28776		8.44719	8.39247	7.27742	10.7755	12.8997		8.85974	7.98121	9.2611	8.1797	9.41583
1.01951	1.0512	1.1419	1.05319	1.05527		2.68534	1.16312	1.0459	1.0556	2.81501		2.66621	2.38632	1.91348	1.84808	1.93513		6.65325	4.37813	8.41044	4.35915	4.27259		8.35176	8.37046	7.28225	10.7551	13.0305		8.9183	7.97471	9.14795	8.07416	9.74724
1.02719	1.05044	1.14554	1.09362	1.0459		2.71794	1.16146	1.0552	1.0481	2.85323		2.66822	2.44429	1.91821	1.83479	1.94644		6.6431	4.40969	8.39761	4.22279	4.3077		8.43144	8.44823	7.28537	10.717	12.86		8.90698	7.97328	9.23159	7.95015	9.61635
1.01491	1.05004	1.14617	1.04075	1.04785		2.74614	1.14407	1.04628	1.03755	3.02579		2.66841	2.40541	1.9092	1.82856	1.93463		6.65512	4.44539	8.38801	4.05231	4.25367		8.38475	8.38699	7.27322	10.7042	12.8849		8.83091	7.97805	9.26187	7.79432	9.45243
1.01854	1.05063	1.15636	1.0751	1.04626		2.74559	1.13901	1.05572	1.03664	3.15981		2.68106	2.42563	1.91931	1.85431	1.94198		6.65449	4.33432	8.32231	3.92085	4.24142		8.31286	8.38101	7.27116	10.7082	12.8085		8.94893	7.99374	9.36829	8.02477	9.70139
1.01652	1.051	1.14188	1.0436	1.04025		2.78581	1.14768	1.05063	1.04846	3.20189		2.68354	2.4324	1.9262	1.84626	1.95917		6.64688	4.30668	8.38986	3.99934	4.26171		8.31808	8.43004	7.24409	10.6971	12.8293		8.82058	7.9835	9.35667	8.34389	9.75772
1.01653	1.05005	1.14374	1.04962	1.0427		2.77423	1.15212	1.05208	1.03757	3.13754		2.68793	2.41985	1.94197	1.85377	1.97619		6.63625	4.3714	8.25875	3.95684	4.22896		8.3164	8.39125	7.24971	10.6892	12.8452		8.81676	7.98623	9.42744	7.95973	9.48837
1.01728	1.04998	1.15003	1.07641	1.03955		2.76648	1.15319	1.06056	1.04795	3.05023		2.68799	2.42699	1.96043	1.84804	1.96519		6.63411	4.3347	8.40857	3.97573	4.23482		8.41044	8.38713	7.2309	10.7213	12.7647		8.85164	7.99538	9.34465	8.24709	9.74828
1.02028	1.05296	1.14577	1.06126	1.03876		2.83076	1.15462	1.05169	1.04925	2.98963		2.69445	2.41783	1.96341	1.87286	1.94339		6.6425	4.21975	8.41894	3.88214	4.17991		8.39761	8.41011	7.24281	10.6867	12.918		8.85528	7.98853	9.40441	7.88342	9.60595
1.01426	1.05181	1.14815	1.06228	1.03411		2.86975	1.17096	1.05009	1.04789	2.97465		2.68686	2.401	1.9435	1.84753	1.98805		6.62197	4.30008	8.32604	4.29923	4.2307		8.38801	8.39116	7.25716	10.6813	12.8989		8.8832	7.97004	9.56682	8.22106	9.39308
1.01301	1.05025	1.15168	1.02358	1.03742		2.86021	1.16797	1.04136	1.04253	2.96433		2.68556	2.41894	1.93986	1.88009	1.96192		6.62528	4.3878	8.32005	3.90464	4.32568		8.32231	8.3955	7.24758	10.6848	12.6277		8.95478	7.96281	9.41084	8.40622	9.59133
1.00929	1.05426	1.14659	1.07585	1.04149		2.85529	1.17139	1.05703	1.05294	2.99499		2.68547	2.42248	1.91252	1.86051	1.96264		6.61916	4.34961	8.34282	4.26798	4.24199		8.38986	8.42467	7.24437	10.7007	12.8156		8.90603	7.95442	9.34933	8.20208	9.55821
1.02374	1.05082	1.14807	1.08516	1.03326		2.83973	1.16303	1.0559	1.04131	2.94814		2.69209	2.41534	1.90098	1.89588	1.94821		6.63977	4.54765	8.49691	3.9131	4.31743		8.25875	8.42797	7.26183	10.6717	12.7319		8.94556	7.95842	9.50913	8.08521	9.58578
1.02379	1.05502	1.14804	1.04986	1.03604		2.87504	1.14533	1.0515	1.04561	2.95272		2.68102	2.43281	1.90235	1.84758	1.95477		6.63987	4.31621	8.31223	4.11027	4.31107		8.40857	8.38794	7.23325	10.6987	12.7563		8.74818	7.94806	9.62704	8.46517	9.69962
1.01785	1.05165	1.14583	1.06197	1.03191		2.82547	1.15143	1.05322	1.0383	2.9492		2.67632	2.43362	1.91513	1.85401	1.95451		6.66291	4.53982	8.43961	4.19245	4.24927		8.41894	8.39701	7.24642	10.7257	12.7242		8.93445	7.94118	9.37729	8.12688	9.55885
1.0207	1.05157	1.14602	1.0795	1.02875		2.81537	1.13913	1.06002	1.04506	2.90457		2.68948	2.4396	1.90085	1.8866	1.94323		6.65548	4.4558	8.3354	4.18668	4.28083		8.32604	8.40379	7.24275	10.7396	12.7423		8.87739	7.97167	9.58114	8.39948	9.41144
1.01424	1.05022	1.14709	1.04468	1.03686		2.77556	1.15132	1.05346	1.04526	2.95442		2.68218	2.45505	1.9042	1.88006	1.94735		6.6358	4.29716	8.482	4.12762	4.24326		8.32005	8.3587	7.21899	10.7684	12.6571		8.92151	7.94462	9.39035	8.46526	9.53741
1.02008	1.04906	1.14111	1.05509	1.03154		2.79125	1.1598	1.04399	1.05791	2.95462		2.68226	2.42371	1.9418	1.85319	2.00322		6.63604	4.40988	8.3526	4.1429	4.2236		8.34282	8.38218	7.22567	10.7778	12.7692		9.00472	7.97012	9.4378	8.43562	9.41579
1.00932	1.0521	1.14814	1.07181	1.03551		2.79617	1.16493	1.04691	1.0584	3.04925		2.68241	2.44291	1.93573	1.89909	1.99685		6.62805	4.42073	8.40204	4.05384	4.3162		8.49691	8.41518	7.24482	10.8119	12.7066		8.8643	7.94825	9.66648	8.20971	9.52553
1.02849	1.05207	1.15011	1.06962	1.02844		2.75765	1.19097	1.0497	1.04954	2.98979		2.68308	2.43567	1.93615	1.89887	1.97857		6.63441	4.38775	8.3177	4.25765	4.30976		8.31223	8.3741	7.21326	10.8282	12.547		8.9305	7.95336	9.63299	8.27223	9.69062
1.01388	1.05138	1.14641	1.07641	1.03095		2.80049	1.18443	1.04599	1.04921	3.03397		2.6948	2.44085	1.92213	1.89326	1.98819		6.63016	4.46812	8.54581	4.17467	4.26936		8.43961	8.40121	7.20957	10.8133	12.5586		8.75904	7.95877	9.56907	8.65537	9.4222
1.02637	1.04893	1.14066	1.06841	1.02846		2.77289	1.17588	1.05427	1.03932	3.00979		2.69862	2.46214	1.89225	1.89097	2.00531		6.66124	4.34529	8.31126	4.00278	4.23329		8.3354	8.37019	7.18866	10.7917	12.5015		8.87365	7.949	9.44056	8.44566	9.35307
1.02326	1.05097	1.14063	1.03455	1.02751		2.7498	1.16756	1.05426	1.0474	2.97773		2.69701	2.45355	1.88881	1.91358	1.96778		6.63575	4.28181	8.19797	4.15203	4.24285		8.482	8.34811	7.17976	10.8278	12.6601		8.9154	7.94138	9.53186	8.36773	9.582
1.01645	1.049	1.13657	1.03826	1.03253		2.70882	1.17721	1.05279	1.04656	2.98861		2.69663	2.47195	1.91132	1.91711	1.98901		6.63262	4.24897	8.39277	3.97284	4.19451		8.3526	8.40636	7.17833	10.7434	12.673		8.94028	7.94107	9.46265	8.41718	9.67073
1.01421	1.05024	1.1419	1.06752	1.02519		2.77324	1.16992	1.04772	1.05069	2.96968		2.69799	2.45438	1.91442	1.90953	1.99593		6.63003	4.45261	8.29738	4.02567	4.32828		8.40204	8.37371	7.16695	10.7521	12.6229		8.95455	7.93732	9.47572	8.37855	9.40983
1.01374	1.0487	1.13606	1.05931	1.03229		2.77346	1.17338	1.04809	1.04611	2.94235		2.70744	2.46865	1.92068	1.90587	2.02128		6.62121	4.4437	8.41008	4.13088	4.36354		8.3177	8.35816	7.16578	10.7216	12.6374		8.94932	7.93081	9.52471	8.49058	9.50588
1.01117	1.05136	1.14421	1.06406	1.02975		2.69352	1.16806	1.05856	1.04693	2.97753		2.69896	2.46936	1.96719	1.90329	1.98542		6.6489	4.49242	8.38041	4.30691	4.33839		8.54581	8.38734	7.16148	10.7213	12.64		8.91718	7.93161	9.68937	8.74617	9.30387
1.01955	1.04983	1.14081	1.08725	1.03955		2.69113	1.16367	1.0477	1.03408	3.0039		2.7032	2.44707	1.96249	1.92443	1.98209		6.63292	4.34022	8.46093	4.01894	4.32858		8.31126	8.36843	7.15466	10.6735	12.8739		8.92159	7.92288	9.58304	8.34308	9.37146
1.02831	1.04969	1.14184	1.04298	1.02303		2.7527	1.15541	1.04856	1.0454	3.01451		2.71313	2.44736	1.95339	1.91185	2.00018		6.63642	4.36213	8.34518	4.2497	4.30522		8.19797	8.34205	7.1411	10.7305	12.6089		8.83543	7.92278	9.51638	8.4394	9.44963
1.02327	1.04977	1.14022	1.05053	1.02184		2.73273	1.16601	1.05144	1.04572	2.98747		2.71698	2.45697	1.94153	1.93142	2.02936		6.61097	4.20215	8.35919	4.03576	4.29074		8.39277	8.37045	7.13502	10.6634	12.589		8.97915	7.91921	9.51928	8.40086	9.24371
1.01361	1.05003	1.14428	1.02415	1.02992		2.75047	1.15844	1.04172	1.04134	3.03319		2.71812	2.48948	1.94528	1.92834	1.99768		6.62429	4.34779	8.45733	3.94946	4.3017		8.29738	8.35839	7.13406	10.6296	12.5626		8.90519	7.91151	9.61062	8.2628	9.39479
1.02483	1.05007	1.13252	1.04917	1.02103		2.75778	1.15796	1.04601	1.05994	3.04619		2.71657	2.48566	1.94281	1.93069	2.03867		6.61046	4.34627	8.36163	4.06	4.26244		8.41008	8.32649	7.13379	10.6628	12.5672		9.04292	7.91049	9.57934	8.0707	9.49743
1.01626	1.04995	1.13967	1.0527	1.02287		2.73705	1.15173	1.04595	1.049	3.09664		2.71335	2.49146	1.94441	1.92411	2.01907		6.62535	4.39508	8.31462	4.48502	4.29356		8.38041	8.35489	7.12806	10.6243	12.5189		8.91751	7.89963	9.76476	8.20021	9.15483
1.01744	1.04916	1.13015	1.06974	1.01538		2.79325	1.15105	1.04947	1.04848	3.14667		2.72195	2.48785	1.93969	1.91355	1.99147		6.61116	4.23191	8.47009	4.23866	4.28382		8.46093	8.34985	7.13336	10.6272	12.4949		8.79856	7.90075	9.61348	8.26981	9.20132
1.01799	1.05049	1.13402	1.09315	1.02443		2.69666	1.13958	1.05045	1.04699	3.05224		2.71251	2.49465	1.93527	1.90586	2.03094		6.59479	4.39103	8.47669	4.18939	4.27018		8.34518	8.33926	7.14033	10.6297	12.6325		8.79408	7.90534	9.56312	8.39981	9.41568
1.01871	1.04862	1.13107	1.05651	1.02934		2.72197	1.16449	1.03956	1.03473	3.1044		2.71156	2.48352	1.95426	1.90854	2.05705		6.6273	4.37551	8.31885	4.12146	4.24843		8.35919	8.34393	7.13481	10.5911	12.4491		8.94117	7.89974	9.59549	8.21709	9.57419
1.0178	1.04766	1.13983	1.0738	1.02529		2.77355	1.16781	1.04078	1.04689	3.09247		2.71327	2.48811	1.9554	1.9454	2.0683		6.64239	4.11387	8.3508	4.20813	4.17144		8.45733	8.32359	7.14045	10.5869	12.4666		8.94739	7.90194	9.65928	8.21437	9.45452
1.01557	1.04828	1.13026	1.05709	1.02929		2.70364	1.15916	1.02946	1.04464	3.05706		2.72896	2.49876	1.96047	1.91238	2.05836		6.62212	4.34786	8.57304	4.26792	4.21944		8.36163	8.32023	7.13235	10.6045	12.6276		8.89233	7.90296	9.71156	8.05911	9.40754
1.01772	1.04967	1.13479	1.0438	1.0331		2.72055	1.17191	1.0376	1.04957	3.11002		2.7285	2.46327	1.97432	1.91481	2.0626		6.63054	4.41751	8.332	4.03116	4.23821		8.31462	8.35675	7.12074	10.5206	12.4179		8.86823	7.88936	9.56714	8.2874	9.3404
1.02068	1.04824	1.13675	1.04787	1.03808		2.76701	1.17852	1.03906	1.05092	3.1906		2.72038	2.46794	1.9775	1.941	2.06373		6.6118	4.46018	8.38513	4.06375	4.23267		8.47009	8.33433	7.14279	10.5451	12.5738		8.89216	7.87792	9.69007	8.34078	9.33276
1.01186	1.05088	1.12906	1.07515	1.04194		2.75498	1.16022	1.04262	1.0411	3.17617		2.72159	2.48233	1.96835	1.94423	2.0321		6.63169	4.42392	8.35818	4.07733	4.27834		8.47669	8.31511	7.10993	10.5591	12.4421		8.85273	7.86231	9.51611	8.42567	9.40539
1.02455	1.0491	1.12899	1.02252	1.0354		2.72778	1.16348	1.04561	1.05106	3.12453		2.72346	2.46792	1.97544	1.94317	2.02607		6.63255	4.36605	8.344	4.06107	4.22725		8.31885	8.3664	7.10407	10.5136	12.414		8.96439	7.87143	9.72277	8.23885	9.41966
1.01083	1.0472	1.12899	1.0591	1.03978		2.70666	1.15846	1.03803	1.0514	3.10135		2.72785	2.49648	1.99467	1.94929	1.99093		6.62996	4.56715	8.4094	4.29367	4.32376		8.3508	8.35197	7.11285	10.5024	12.4976		8.91903	7.86772	9.68955	8.15635	9.43882
1.01198	1.04687	1.14178	1.0584	1.03773		2.75381	1.15424	1.03953	1.04188	3.05897		2.73792	2.48039	1.99476	1.95035	2.03488		6.61154	4.35744	8.46344	4.3693	4.29418		8.57304	8.3202	7.10697	10.5747	12.4076		8.85744	7.85775	9.67314	8.17393	9.31131
1.02138	1.04794	1.14161	1.0503	1.03956		2.74976	1.13352	1.04192	1.05071	3.09091		2.7299	2.47515	1.99316	1.9525	2.01483		6.62421	4.40157	8.44648	4.33376	4.20087		8.332	8.34433	7.09731	10.5621	12.2539		8.94276	7.86548	9.71936	8.37695	8.89297
1.0112	1.04803	1.15959	1.07736	1.03895		2.77823	1.13132	1.03504	1.03564	3.12538		2.73397	2.49159	1.98077	1.96597	2.04303		6.61139	4.23227	8.45698	4.22589	4.27336		8.38513	8.34205	7.10537	10.5376	12.3259		9.00494	7.85997	9.73819	7.95954	9.08731
1.01909	1.04811	1.15666	1.06886	1.03682		2.77273	1.16509	1.02995	1.04586	3.10792		2.72857	2.49784	1.99016	1.96174	2.06577		6.61746	4.44542	8.25572	4.13988	4.28926		8.35818	8.32363	7.1144	10.5703	12.3576		8.81118	7.84461	9.64375	8.30563	9.24107
1.00859	1.04828	1.15935	1.06527	1.03977		2.73081	1.15182	1.03925	1.03868	3.15922		2.72924	2.49727	2.00075	1.96241	2.0403		6.61601	4.29457	8.41521	4.16429	4.26806		8.344	8.34991	7.08316	10.6091	12.4968		8.83816	7.82888	9.61588	8.11257	9.46781
1.01927	1.04811	1.15249	1.06886	1.03311		2.69935	1.14132	1.02716	1.06085	3.12873		2.72787	2.48382	1.99623	1.9579	2.05344		6.60024	4.22708	8.44595	4.04206	4.2308		8.4094	8.3501	7.09388	10.5654	12.3063		8.82516	7.83111	9.85459	8.34657	9.17642
1.01001	1.04885	1.15139	1.06436	1.04006		2.76164	1.14767	1.03221	1.05877	3.11549		2.73748	2.50783	1.98935	1.9532	2.05094		6.61266	4.26286	8.28047	4.3056	4.31463		8.46344	8.29594	7.10048	10.6128	12.4664		8.78873	7.83173	9.74527	8.29244	9.13795
1.0152	1.04607	1.15868	1.07473	1.02755		2.70847	1.13876	1.03217	1.04947	3.12763		2.72316	2.50559	1.98965	1.93158	2.02749		6.61587	4.32162	8.25937	4.23115	4.31132		8.44648	8.34377	7.06159	10.6111	12.4245		8.77205	7.84065	9.87982	8.20655	9.43892
1.01189	1.04857	1.15158	1.06785	1.03183		2.72051	1.15942	1.03196	1.03948	3.12805		2.733	2.50033	1.97928	1.94063	2.01976		6.60843	4.40247	8.35276	4.42163	4.25524		8.45698	8.32798	7.0736	10.5878	12.2583		8.88809	7.84889	9.79725	8.35275	9.45286
1.02039	1.04735	1.14347	1.04567	1.03678		2.75466	1.15916	1.0364	1.05191	3.11294		2.73666	2.50241	2.00321	1.98429	2.06897		6.62014	4.3266	8.35395	4.40529	4.26366		8.25572	8.27828	7.10262	10.5904	12.4209		8.91719	7.84879	9.80643	8.6378	9.02668
1.01459	1.0453	1.14471	1.03401	1.03668		2.75628	1.16155	1.03744	1.05004	3.18146		2.73082	2.53369	2.01865	1.95866	2.05642		6.59749	4.51081	8.39681	4.36382	4.24907		8.41521	8.32426	7.04198	10.6159	12.4216		8.80023	7.84384	9.6479	8.37784	9.24248
1.02236	1.04558	1.16089	1.03403	1.04169		2.81571	1.15786	1.04164	1.05138	3.16525		2.74347	2.5141	2.0366	1.95341	2.05956		6.61392	4.41717	8.32356	4.22396	4.24275		8.44595	8.32909	7.05786	10.5945	12.2453		8.78126	7.83907	9.87714	7.9966	8.97239
1.01415	1.04631	1.16465	1.08113	1.04098		2.77296	1.15862	1.02407	1.04144	3.17608		2.74786	2.51804	2.05188	1.97275	2.05311		6.62774	4.53722	8.35133	4.14627	4.24572		8.28047	8.27989	7.05234	10.5944	12.332		8.86393	7.83742	9.71322	8.28893	9.37786
1.02467	1.04546	1.16847	1.02933	1.04295		2.86471	1.13572	1.0332	1.05303	3.17045		2.74606	2.53888	2.08225	1.96652	2.01003		6.61511	4.42844	8.25484	4.14921	4.21407		8.25937	8.32468	7.05046	10.6597	12.5261		8.84456	7.83063	9.74977	8.22796	9.21277
1.02083	1.04682	1.17721	1.04821	1.04266		2.81182	1.14444	1.0338	1.04012	3.27436		2.74137	2.54778	2.08644	1.99136	2.02646		6.63254	4.4483	8.30706	4.40909	4.20411		8.35276	8.31317	7.05147	10.6821	12.218		8.75084	7.83793	9.94161	8.22917	9.31131
1.02088	1.04836	1.19196	1.05826	1.03625		2.85421	1.14634	1.03418	1.04734	3.24445		2.74599	2.53752	2.07689	2.00526	2.06619		6.63239	4.50741	8.31876	4.10051	4.2496		8.35395	8.2692	7.05088	10.5636	12.2255		8.96521	7.83241	10.0439	8.11411	9.12276
1.01843	1.04876	1.1989	1.04663	1.04116		2.86881	1.13635	1.03603	1.03855	3.1769		2.746	2.53251	2.03141	1.99795	2.07693		6.63447	4.52127	8.32706	4.21665	4.23184		8.39681	8.31744	7.04968	10.5859	12.1991		8.86543	7.82936	9.90924	8.37272	9.29621
1.02148	1.04924	1.1933	1.04673	1.0382		2.87661	1.13509	1.03813	1.04971	3.14535		2.74034	2.55352	2.02205	1.98875	2.07593		6.64441	4.31331	8.31647	4.34584	4.23195		8.32356	8.32215	7.03961	10.6403	12.2856		8.78503	7.81104	9.98684	8.45191	9.09186
1.01624	1.04833	1.1857	1.0756	1.03184		2.8896	1.17452	1.03318	1.04125	3.15716		2.74653	2.55646	2.03261	2.00065	2.09864		6.63788	4.33056	8.39137	4.45394	4.25272		8.35133	8.28947	7.04972	10.643	12.336		8.83588	7.78703	9.9975	8.40457	8.98593
1.01559	1.04882	1.18934	1.01056	1.03946		2.77983	1.16716	1.03784	1.04818	3.18326		2.7515	2.56141	1.98335	1.98156	2.05926		6.62002	4.55035	8.30681	4.39729	4.30003		8.25484	8.30674	7.00867	10.6558	12.0074		8.9071	7.78876	9.9868	8.30326	9.19144
1.01952	1.04913	1.18647	1.05735	1.03557		2.86402	1.15772	1.03896	1.04802	3.1803		2.75152	2.52097	1.99703	1.96489	2.08536		6.5858	4.44318	8.23848	4.32624	4.18937		8.30706	8.32695	6.98852	10.6566	12.1494		8.72886	7.79251	9.98517	8.49959	9.26538
1.01811	1.0477	1.18738	1.07392	1.03558		2.91773	1.15926	1.04557	1.04917	3.16223		2.74778	2.54748	1.99011	1.97403	2.08405		6.6054	4.44412	8.34059	4.03582	4.16801		8.31876	8.29692	7.01679	10.6418	12.1512		8.91708	7.80058	9.88408	8.29413	9.03443
1.02083	1.05015	1.17858	1.04631	1.03579		2.82693	1.16681	1.04168	1.03884	3.15906		2.75725	2.54589	1.98481	1.96219	2.06513		6.58953	4.47648	8.30028	4.11181	4.14453		8.32706	8.29189	7.02598	10.568	12.2883		8.82601	7.80283	9.88482	8.3149	9.22245
1.0234	1.04815	1.17961	1.08217	1.02727		2.84365	1.17043	1.04054	1.04892	3.1432		2.75614	2.5524	1.98934	1.97037	2.0449		6.59812	4.54097	8.3754	4.24702	4.18682		8.31647	8.31973	6.98934	10.6177	12.2757		8.82061	7.79155	10.05	8.13062	9.27255
1.02115	1.04697	1.17953	1.05685	1.03187		2.82174	1.18031	1.03604	1.04979	3.10616		2.76559	2.55522	1.99102	1.9816	2.05599		6.59465	4.35265	8.48279	4.38798	4.20727		8.39137	8.29176	7.01601	10.5571	12.1323		8.95281	7.79692	10.0681	8.2164	9.03453
1.01806	1.04639	1.17394	1.06812	1.02824		2.81962	1.16651	1.03184	1.03611	3.16659		2.7749	2.56201	1.99294	1.97661	2.06396		6.58465	4.52852	8.21653	4.3527	4.16027		8.30681	8.29571	7.03418	10.5404	12.0918		8.89536	7.7839	9.93533	8.48166	8.92999
1.01347	1.04622	1.17447	1.10609	1.02633		2.83769	1.14962	1.0391	1.05004	3.12168		2.78417	2.60089	1.9971	1.99483	2.05793		6.56907	4.45113	8.3281	4.40685	4.12242		8.23848	8.31738	7.021	10.6166	12.1001		8.81811	7.76667	9.96995	8.21608	9.017
1.00949	1.04644	1.18388	1.06292	1.02225		2.80865	1.15852	1.04487	1.04731	3.0798		2.79018	2.55994	1.99987	1.98083	2.03582		6.57261	4.4057	8.44362	4.22474	4.16522		8.34059	8.28382	7.02332	10.5941	12.2344		8.76145	7.76403	9.96096	8.5101	8.87247
1.0204	1.04415	1.18567	1.07046	1.02296		2.89415	1.14859	1.04489	1.04048	3.10467		2.79737	2.57444	1.99001	1.9813	2.05783		6.58218	4.40823	8.35974	4.0988	4.27008		8.30028	8.25748	7.04648	10.5392	12.0914		8.83183	7.77307	10.2014	8.32891	8.99767
1.02364	1.04444	1.18736	1.08446	1.02903		2.82424	1.16889	1.04355	1.05014	3.20142		2.79585	2.5567	1.98579	2.00139	2.07449		6.59241	4.40184	8.29362	4.33608	4.29592		8.3754	8.30398	7.0073	10.532	12.3399		8.87981	7.74669	10.0779	8.54599	9.16064
1.01463	1.04575	1.19353	1.07065	1.03192		2.92866	1.16055	1.03165	1.03881	3.17495		2.79405	2.57309	2.00913	1.98161	2.10112		6.57551	4.4211	8.37073	4.03323	4.18564		8.48279	8.26725	7.01298	10.4612	12.2184		8.84407	7.75307	10.1874	8.26288	9.31167
1.01371	1.04344	1.19573	1.07482	1.02836		2.91368	1.16295	1.03336	1.04709	3.18629		2.80788	2.59524	2.01156	1.97705	2.06671		6.57904	4.57144	8.2656	4.23438	4.14443		8.21653	8.26274	7.04805	10.4718	11.9021		8.80705	7.75549	10.1053	8.12372	9.03412
1.01276	1.04434	1.19644	1.0534	1.03192		2.86734	1.16088	1.02889	1.04826	3.23765		2.80287	2.58429	2.00444	2.00028	2.0906		6.5743	4.40501	8.36782	4.04236	4.17424		8.3281	8.27381	7.00769	10.6435	12.1702		8.82071	7.75075	10.0976	8.08013	8.99872
1.02212	1.04478	1.19308	1.05738	1.02927		2.88809	1.15841	1.03689	1.05979	3.24618		2.80051	2.58344	2.03126	2.00882	2.10074		6.59105	4.46809	8.29619	4.23968	4.12107		8.44362	8.28016	7.00912	10.5546	12.0037		8.90842	7.75016	10.0901	8.29023	9.07939
1.0197	1.04485	1.18248	1.05446	1.02944		2.90477	1.15873	1.0377	1.04833	3.36495		2.81426	2.60629	2.05152	2.00955	2.1137		6.58856	4.41494	8.34193	4.19971	4.1445		8.35974	8.25578	7.01736	10.436	12.127		8.88749	7.73729	10.1065	8.3838	8.80068
1.01618	1.04294	1.18983	1.03352	1.02749		2.84689	1.15456	1.03598	1.05877	3.31664		2.80548	2.60005	2.01963	2.02682	2.10434		6.59818	4.36538	8.42734	4.00099	4.14653		8.29362	8.26145	7.01584	10.5686	11.9627		8.82495	7.72108	10.1627	8.19844	9.07
1.015	1.04349	1.19273	1.08105	1.02803		2.86887	1.13872	1.03815	1.05913	3.2782		2.79235	2.60647	2.0241	1.99482	2.10666		6.58812	4.4947	8.26394	4.21585	4.03973		8.37073	8.27839	6.99298	10.6389	12.3878		8.9325	7.73899	10.0225	8.269	8.64866
1.01895	1.04498	1.17638	1.06831	1.02424		2.82488	1.15629	1.04867	1.04958	3.26921		2.78482	2.59464	2.04447	2.01095	2.15965		6.5978	4.59972	8.26829	4.46002	4.12735		8.2656	8.24108	7.04248	10.4477	12.1081		8.81767	7.72928	10.0453	8.52773	9.24638
1.01796	1.04534	1.17588	1.04294	1.01599		2.81801	1.1619	1.03227	1.03907	3.34086		2.79733	2.61606	2.02339	2.01279	2.13936		6.59011	4.46714	8.40539	4.21761	4.1851		8.36782	8.2761	7.00935	10.5128	12.0893		8.91447	7.72137	10.156	8.16953	9.15176
1.01977	1.04642	1.17046	1.08268	1.02739		2.83506	1.1413	1.03724	1.03462	3.39957		2.7939	2.59863	1.9869	1.99476	2.11502		6.57695	4.60743	8.32348	4.27723	4.11486		8.29619	8.25872	6.99427	10.5611	12.094		8.80134	7.73985	10.1411	8.24658	8.9496
1.01346	1.0464	1.17257	1.03432	1.02565		2.83645	1.13973	1.03682	1.04245	3.38146		2.78867	2.60778	2.01095	2.00802	2.11405		6.6059	4.6249	8.3161	4.42454	4.1661		8.34193	8.25405	7.01225	10.4319	12.0854		8.83933	7.70645	10.184	8.15346	8.76274
1.0156	1.04584	1.16891	1.04762	1.02142		2.82856	1.14488	1.0298	1.03669	3.24416		2.79541	2.61118	2.01802	2.02142	2.12893		6.59564	4.47004	8.16458	4.10005	4.20359		8.42734	8.24939	7.01976	10.3954	12.0748		8.7585	7.71788	10.1955	8.34966	8.97585
1.02146	1.04547	1.16437	1.06321	1.02754		2.85946	1.15837	1.03801	1.04921	3.28128		2.79066	2.63476	2.01485	2.01894	2.10083		6.58798	4.49472	8.36959	4.36316	4.23574		8.26394	8.26684	6.96509	10.5085	12.0556		8.85765	7.72141	10.0749	8.07764	8.84186
1.01686	1.0435	1.16391	1.05377	1.02754		2.84521	1.15939	1.02725	1.0491	3.21437		2.79258	2.60745	2.00846	2.01886	2.11688		6.57162	4.48597	8.20364	4.38182	4.25681		8.26829	8.2529	6.99094	10.4477	12.196		8.82966	7.6993	10.251	8.171	9.1402
1.02316	1.04328	1.16908	1.08841	1.02354		2.87331	1.1541	1.03547	1.05008	3.1628		2.79445	2.62162	2.01594	2.01351	2.10334		6.58647	4.58058	8.23008	4.39183	4.20902		8.40539	8.26811	6.99825	10.374	12.059		8.92466	7.69042	10.2084	8.34293	8.89056
1.02362	1.04316	1.16802	1.09152	1.02059		2.80864	1.14472	1.02978	1.04758	3.12217		2.78462	2.62811	2.02424	2.04111	2.12597		6.58411	4.55945	8.19167	4.34483	4.23882		8.32348	8.28973	6.98373	10.4731	12.0258		8.80983	7.68142	10.0354	8.47827	9.27555
1.01609	1.04303	1.16191	1.0613	1.02934		2.93446	1.1341	1.03244	1.03863	3.17295		2.79312	2.64591	2.02067	2.03234	2.12773		6.58734	4.52589	8.1552	4.37574	4.26267		8.3161	8.26487	6.99155	10.4288	12.1848		8.78457	7.68446	9.99673	8.30516	8.78517
1.01727	1.04284	1.16853	1.06588	1.03188		2.86798	1.1461	1.03206	1.04853	3.13966		2.80383	2.63129	2.02202	2.04563	2.14916		6.59181	4.44346	8.27625	4.40225	4.20343		8.16458	8.29159	6.97188	10.385	12.1467		8.83605	7.67908	10.537	8.19683	8.84753
1.01357	1.04256	1.17021	1.02956	1.02188		2.83485	1.15093	1.03917	1.0481	3.12288		2.80756	2.62866	2.04069	2.0519	2.15264		6.558	4.24924	8.18906	4.20376	4.08778		8.36959	8.29768	6.98428	10.4203	11.9834		8.72893	7.6742	10.3017	8.02085	8.9014
1.01228	1.04442	1.16174	1.074	1.02869		2.85987	1.15343	1.03556	1.04928	3.19082		2.79937	2.64251	2.05422	2.01537	2.13514		6.58313	4.39538	8.19309	4.21658	4.26868		8.20364	8.2821	6.967	10.4209	11.9766		8.72726	7.68228	10.2171	8.21809	8.92902
1.0153	1.04367	1.16188	1.05423	1.02893		2.81524	1.1561	1.03483	1.05039	3.16452		2.80958	2.62833	2.04858	2.04677	2.1319		6.5624	4.39811	8.36621	4.33693	4.17683		8.23008	8.30463	6.98443	10.373	11.9632		8.8814	7.66257	10.4261	8.33626	8.75123
1.00909	1.04183	1.16269	1.0785	1.02556		2.75216	1.14845	1.03364	1.03493	3.22485		2.8076	2.63135	2.01483	2.02048	2.11783		6.57695	4.48831	8.15348	4.26204	4.13124		8.19167	8.32353	6.94764	10.3648	11.942		8.81405	7.67162	10.3894	8.11445	8.80334
1.00895	1.04222	1.15626	1.07811	1.02789		2.82266	1.13875	1.02919	1.04631	3.23225		2.81131	2.6609	2.03509	2.02828	2.15912		6.58681	4.25595	8.15479	4.47681	4.16336		8.1552	8.34728	6.95085	10.4325	11.936		8.74653	7.6655	10.1962	8.41282	8.98854
1.01019	1.04172	1.16475	1.06727	1.03001		2.83759	1.15149	1.02467	1.04531	3.24792		2.81166	2.63759	2.03571	2.04984	2.13766		6.57669	4.42254	8.33468	4.23716	4.19658		8.27625	8.3625	6.96075	10.3902	11.9469		8.85874	7.66373	10.3027	8.33927	8.92408
1.01508	1.04405	1.17177	1.05173	1.02558		2.90078	1.15386	1.04017	1.04375	3.32531		2.80922	2.63034	2.05628	2.04387	2.12693		6.58197	4.46799	8.2323	4.26199	4.20814		8.18906	8.37661	6.94547	10.4009	12.0474		8.86348	7.65986	10.3553	8.54921	8.79485
1.01516	1.04357	1.16751	1.03624	1.01887		2.87937	1.15797	1.03666	1.05137	3.28813		2.8179	2.64324	2.04563	2.04604	2.14878		6.58354	4.53848	8.14898	4.32573	4.14757		8.19309	8.35472	6.92896	10.4414	11.8452		8.86267	7.6626	10.3551	8.18263	9.02231
1.01224	1.04117	1.16865	1.0576	1.02494		2.89657	1.17206	1.03379	1.04313	3.27766		2.81119	2.63529	2.05189	2.0413	2.15513		6.58003	4.44571	8.08292	4.43149	4.14996		8.36621	8.33281	6.94196	10.4192	11.9918		8.85596	7.67605	10.3911	8.03287	8.9589
1.01784	1.04458	1.17107	1.06972	1.02473		2.82689	1.17749	1.02705	1.05128	3.26444		2.81725	2.62193	2.03997	2.0292	2.15038		6.58577	4.51182	8.29135	4.43436	4.21798		8.15348	8.30986	6.95716	10.4044	11.9764		8.86008	7.6623	10.522	8.54955	8.94135
1.02172	1.04425	1.17304	1.03214	1.0167		2.86148	1.16792	1.03253	1.03936	3.2768		2.8201	2.6307	2.04696	2.06273	2.13546		6.58545	4.41856	8.20014	4.32712	4.09048		8.15479	8.30875	6.9305	10.4539	12.0838		8.80255	7.67013	10.543	8.60144	8.92192
1.02441	1.04403	1.16688	1.04573	1.02752		2.82384	1.17152	1.03089	1.04792	3.23373		2.81673	2.62466	2.05078	2.03024	2.11679		6.59773	4.3186	8.23582	4.40728	4.107		8.33468	8.29405	6.95116	10.4382	11.8249		8.80452	7.65459	10.4426	8.3792	9.12771
1.0138	1.04411	1.16221	1.03914	1.02497		2.90269	1.17417	1.02335	1.0391	3.25949		2.81959	2.66888	2.06898	2.06015	2.16461		6.57939	4.55462	8.19749	4.11519	4.11458		8.2323	8.25711	6.91803	10.4101	11.767		8.75891	7.65338	10.3795	8.20558	8.98566
1.01922	1.04431	1.15545	1.04144	1.032		2.88509	1.17363	1.03437	1.05375	3.18726		2.82621	2.65635	2.05854	2.07464	2.16306		6.56574	4.41311	8.31381	4.27335	4.05449		8.14898	8.27069	6.92316	10.4324	12.0733		8.7767	7.63314	10.4654	8.22465	9.22423
1.01301	1.04255	1.15282	1.05828	1.01659		2.8548	1.17352	1.03733	1.05282	3.19643		2.8426	2.64138	2.05042	2.08001	2.15971		6.5373	4.53249	8.21367	4.05952	4.04647		8.08292	8.27451	6.93835	10.487	11.929		8.67857	7.63441	10.2432	8.20335	9.29866
1.00801	1.0437	1.15481	1.05443	1.02325		2.82508	1.16621	1.03427	1.05292	3.19724		2.83755	2.65708	2.04711	2.05789	2.15007		6.55568	4.43786	8.05565	4.41022	4.08329		8.29135	8.26644	6.93313	10.4543	11.7479		8.79198	7.62988	10.5632	8.13937	9.17206
1.02209	1.04383	1.15923	1.03334	1.02749		2.85117	1.17413	1.03516	1.04807	3.21138		2.82257	2.65553	2.03727	2.03052	2.12467		6.56037	4.34392	8.28746	4.53285	4.10623		8.20014	8.27881	6.91052	10.456	11.7715		8.70703	7.63093	10.4816	8.37095	9.09715
1.02192	1.04379	1.15174	1.05102	1.02287		2.83484	1.14851	1.03353	1.05955	3.20823		2.82917	2.6422	2.05405	2.05041	2.11438		6.55976	4.39557	8.11159	4.19283	4.0622		8.23582	8.29642	6.93093	10.4522	12.0202		8.72785	7.63698	10.5496	8.37087	9.28042
1.01643	1.04295	1.16086	1.09554	1.02761		2.85935	1.16576	1.03704	1.05149	3.1946		2.83274	2.64918	2.09538	2.06629	2.11209		6.56874	4.43556	8.17558	4.37493	3.98683		8.19749	8.26964	6.92245	10.4241	11.8994		8.75749	7.62239	10.4065	8.20373	9.21992
1.00552	1.04115	1.15591	1.10068	1.0291		2.88026	1.17088	1.04363	1.04992	3.25003		2.82236	2.65564	2.08137	2.07087	2.13267		6.53603	4.22262	8.07932	4.39845	4.09614		8.31381	8.2578	6.91447	10.4383	11.7123		8.772	7.61292	10.5199	8.35544	8.9139
1.00931	1.04245	1.15598	1.0369	1.0259		2.78253	1.16664	1.03629	1.04908	3.24651		2.8328	2.6712	2.07684	2.10217	2.13928		6.57222	4.40544	8.24669	4.39108	4.08282		8.21367	8.26589	6.91776	10.4291	11.8943		8.74657	7.62995	10.4759	8.38641	9.17991
1.02431	1.04244	1.15551	1.05615	1.02735		2.83987	1.13935	1.03976	1.04381	3.17481		2.84171	2.68038	2.08074	2.07732	2.14889		6.55485	4.43152	8.08422	4.35355	4.0284		8.05565	8.22514	6.91528	10.3951	11.8801		8.71368	7.61021	10.5912	8.45547	9.1325
1.00974	1.0418	1.16409	1.07142	1.02405		2.83089	1.15195	1.03771	1.04878	3.28477		2.82967	2.68777	2.07018	2.09335	2.17427		6.54635	4.70477	8.1637	4.45827	4.04485		8.28746	8.24505	6.90534	10.3567	11.6877		8.80119	7.62439	10.6835	8.21565	8.86932
1.01085	1.04161	1.16651	1.04925	1.01989		2.83889	1.16888	1.03754	1.05277	3.29651		2.84769	2.6974	2.08283	2.07497	2.17461		6.5591	4.49172	8.18367	4.15463	4.00715		8.11159	8.25768	6.91874	10.3705	11.703		8.78746	7.60234	10.3255	8.3894	8.95014
1.01456	1.04081	1.16473	1.0628	1.01312		2.7734	1.15046	1.04191	1.05267	3.29251		2.85869	2.68331	2.0741	2.08782	2.16556		6.53847	4.57504	8.17785	4.36172	4.04236		8.17558	8.25549	6.91814	10.3608	11.8083		8.71035	7.61516	10.5271	8.32425	8.6884
1.01862	1.04106	1.16941	1.06556	1.02501		2.74514	1.14899	1.04536	1.0519	3.22975		2.84526	2.68089	2.07067	2.08901	2.17222		6.5508	4.46647	8.24928	4.44411	4.12584		8.07932	8.26395	6.90414	10.3324	11.828		8.84235	7.61638	10.5462	8.19178	8.80835
1.01392	1.04103	1.16359	1.07288	1.02411		2.74539	1.17174	1.02849	1.05383	3.32239		2.84097	2.67746	2.06546	2.08853	2.16568		6.55143	4.42006	8.26337	4.40989	4.0869		8.24669	8.2303	6.91453	10.3608	12.0723		8.83698	7.60207	10.5028	8.1071	8.72197
1.0175	1.04301	1.15724	1.05531	1.02344		2.82878	1.1675	1.04338	1.04427	3.28816		2.8579	2.7013	2.06013	2.09616	2.15069		6.54578	4.53781	8.11587	4.28931	4.05408		8.08422	8.28054	6.90423	10.4046	11.6765		8.79007	7.62163	10.5817	8.41437	8.97793
1.01636	1.0422	1.15315	1.07925	1.01965		2.76664	1.17057	1.04942	1.04862	3.19591		2.85706	2.7046	2.06641	2.08351	2.16582		6.57215	4.60687	8.3109	4.55083	4.06289		8.1637	8.24644	6.91345	10.3819	11.8113		8.73658	7.60946	10.5316	8.52353	8.9887
1.02905	1.04195	1.15932	1.06333	1.01656		2.90885	1.16387	1.04633	1.04903	3.24815		2.86003	2.71124	2.08186	2.08795	2.12541		6.55856	4.50872	8.15906	4.26291	4.07575		8.18367	8.25415	6.89503	10.352	11.7584		8.76866	7.60324	10.6516	8.40601	8.46998
1.02048	1.0411	1.15589	1.05368	1.01978		2.79276	1.15171	1.04262	1.05221	3.20793		2.85976	2.68639	2.07017	2.07123	2.15713		6.54562	4.35345	8.22137	4.38907	4.12422		8.17785	8.26809	6.90618	10.3566	11.628		8.66057	7.61553	10.4613	8.16368	8.83549
1.01544	1.04104	1.15682	1.05462	1.01641		2.88429	1.14516	1.04431	1.04257	3.22408		2.86537	2.69479	2.05545	2.11233	2.16103		6.53106	4.56026	8.19862	4.15961	4.10396		8.24928	8.22489	6.90269	10.3419	11.9592		8.73757	7.61719	10.4191	8.42591	8.47968
1.01131	1.03974	1.15729	1.06766	1.02561		2.86006	1.13882	1.03752	1.05139	3.27604		2.86501	2.69819	2.0386	2.11319	2.13166		6.51246	4.51967	8.25018	4.2129	4.07178		8.26337	8.24533	6.90038	10.3426	11.7423		8.64157	7.60787	10.7289	8.26848	8.55826
1.02059	1.04011	1.17946	1.08029	1.02616		2.88132	1.15434	1.04449	1.05128	3.27134		2.86612	2.676	2.04114	2.11205	2.15205		6.55777	4.62548	8.10959	4.41059	4.10846		8.11587	8.23815	6.90559	10.37	11.8864		8.79256	7.60772	10.5585	8.1055	8.67876
1.01968	1.04041	1.20733	1.04765	1.01572		2.88956	1.16489	1.04397	1.04462	3.27202		2.86681	2.69926	2.05257	2.11521	2.14987		6.55239	4.57071	8.25249	4.25473	4.09295		8.3109	8.21617	6.90424	10.3908	11.5873		8.73696	7.59198	10.6082	8.2573	8.72685
1.01771	1.03851	1.21415	1.08027	1.02639		2.86703	1.1405	1.03574	1.06973	3.26998		2.86578	2.70232	2.05258	2.09684	2.16119		6.55561	4.47301	8.14389	4.58395	4.12814		8.15906	8.22793	6.88914	10.3252	11.8854		8.775	7.60705	10.6271	8.11143	8.77684
1.01696	1.04053	1.21618	1.02954	1.01977		2.8571	1.16902	1.04897	1.05658	3.32546		2.86385	2.69006	2.08742	2.11613	2.13876		6.53933	4.34707	8.12495	4.40545	4.09333		8.22137	8.22941	6.88256	10.3803	11.736		8.80165	7.59467	10.729	8.30541	8.47655
1.01573	1.04017	1.22184	1.06504	1.02553		2.83439	1.17882	1.04488	1.04276	3.24258		2.87304	2.68255	2.09106	2.09995	2.13697		6.54996	4.32955	8.0611	4.48625	4.1138		8.19862	8.22599	6.87343	10.3757	11.5554		8.77085	7.59072	10.5525	8.48873	8.54318
1.02084	1.03923	1.21988	1.06948	1.02465		2.88633	1.17875	1.04956	1.04337	3.34008		2.86974	2.7081	2.09306	2.1203	2.17359		6.56154	4.39185	8.18047	4.49111	4.12969		8.25018	8.21253	6.88713	10.3484	11.6917		8.7431	7.58924	10.497	8.60741	8.67416
1.00961	1.03962	1.21173	1	1.02843		2.84217	1.173	1.05427	1.05457	3.28909		2.86686	2.68631	2.08152	2.10595	2.11304		6.55653	4.62956	8.19665	4.41618	4.12509		8.10959	8.24451	6.85531	10.3707	11.9803		8.71915	7.57768	10.4047	8.01084	7.99887
1.01639	1.03984	1.20004	1.02996	1.03452		2.88047	1.16414	1.05939	1.04975	3.24064		2.87749	2.69817	2.07814	2.11493	2.13386		6.55023	4.3545	8.09831	4.3158	4.13334		8.25249	8.26201	6.85899	10.3565	11.9823		8.7667	7.59216	10.4467	8.39339	8.72433
1.02067	1.04024	1.20279	1.05463	1.02807		2.81872	1.1727	1.04933	1.05258	3.19445		2.86422	2.70064	2.08366	2.09025	2.16131		6.54254	4.3993	8.23152	4.67596	4.06792		8.14389	8.20841	6.86401	10.3431	11.838		8.64902	7.57966	10.4267	8.24516	8.43767
1.01983	1.03946	1.19515	1.0758	1.0327		2.75048	1.16633	1.05237	1.0495	3.24424		2.8662	2.7084	2.07651	2.13208	2.16079		6.53878	4.70947	8.17657	4.46766	4.12117		8.12495	8.26348	6.85695	10.3327	11.8054		8.71636	7.59067	10.5	8.51448	8.75717
1.01835	1.0393	1.1932	1.0658	1.02638		2.75846	1.17248	1.05487	1.04146	3.28701		2.8751	2.70691	2.09328	2.11552	2.15501		6.54455	4.43124	8.18225	4.4118	4.12874		8.0611	8.27278	6.84412	10.3468	11.9753		8.83418	7.58145	10.7366	8.29413	8.42898
1.021	1.03963	1.1889	1.05359	1.02326		2.71551	1.17893	1.0626	1.04719	3.2617		2.87443	2.70811	2.07446	2.1387	2.18127		6.52936	4.46782	8.10076	4.29434	4.1275		8.18047	8.22522	6.85535	10.3195	11.6259		8.73287	7.57835	10.6402	8.49587	8.62844
1.0151	1.03851	1.19502	1.07743	1.03141		2.71491	1.16728	1.05429	1.04624	3.21039		2.88273	2.71827	2.11665	2.13725	2.14917		6.55186	4.52399	8.09633	4.39326	4.0532		8.19665	8.24811	6.86482	10.3119	11.9167		8.70123	7.58053	10.4811	8.12717	8.38243
1.01928	1.0391	1.19306	1.0776	1.03367		2.75199	1.16888	1.05609	1.05119	3.24436		2.88178	2.71356	2.1275	2.13024	2.1823		6.51841	4.39377	8.12074	4.34873	4.15495		8.09831	8.27841	6.84517	10.3112	11.6058		8.73834	7.58293	10.6818	8.21484	8.12537
1.02199	1.0368	1.19527	1.05834	1.02915		2.71952	1.17372	1.04903	1.0514	3.27792		2.8779	2.72586	2.13605	2.12209	2.18971		6.52791	4.57043	8.2771	4.4363	4.16785		8.23152	8.21351	6.85922	10.2642	11.7444		8.81644	7.56033	10.4377	8.3809	8.29279
1.01839	1.03753	1.19162	1.05676	1.02188		2.75353	1.16806	1.04873	1.0416	3.30155		2.88083	2.73273	2.10303	2.16548	2.18771		6.53669	4.45674	8.02291	4.42418	4.066		8.17657	8.26098	6.87678	10.3072	11.7307		8.77884	7.57532	10.3216	8.32961	8.30915
1.01404	1.03707	1.18825	1.07063	1.02609		2.81624	1.17957	1.04638	1.05105	3.28435		2.8897	2.72272	2.08521	2.14435	2.12847		6.52573	4.49768	8.13656	4.19415	4.12513		8.18225	8.28881	6.832	10.2996	11.7631		8.77848	7.55509	10.6389	8.21539	8.2387
1.01422	1.03776	1.18877	1.0674	1.02869		2.75963	1.17278	1.05505	1.04225	3.27246		2.89114	2.72853	2.0906	2.14238	2.14969		6.54317	4.41565	8.18336	4.3737	4.13842		8.10076	8.24579	6.85716	10.2665	11.9903		8.69309	7.55614	10.4467	8.4115	8.38105
1.01178	1.03744	1.18769	1.0948	1.02375		2.826	1.16626	1.05733	1.04156	3.22126		2.90199	2.72269	2.0798	2.16429	2.16086		6.52854	4.47459	8.00739	4.26851	4.22109		8.09633	8.27172	6.86652	10.2915	11.6845		8.69237	7.54005	10.488	8.23681	8.2574
1.01562	1.03765	1.18647	1.05373	1.0266		2.80136	1.17093	1.05335	1.05136	3.32229		2.90202	2.72462	2.0977	2.14417	2.16982		6.50334	4.49759	8.15218	4.50012	4.20776		8.12074	8.28427	6.85853	10.3064	11.7153		8.75035	7.53128	10.3006	8.31575	8.01632
1.01143	1.03845	1.18685	1.06955	1.02191		2.86083	1.17782	1.06157	1.05049	3.3368		2.90982	2.73482	2.10686	2.15678	2.16234		6.50821	4.43527	8.12931	4.46112	4.14941		8.2771	8.23228	6.84448	10.2903	11.6699		8.74088	7.53092	10.4941	8.42471	8.36481
1.01876	1.03931	1.18389	1.0955	1.01601		2.85669	1.17957	1.05597	1.04042	3.30512		2.91849	2.72683	2.08578	2.11433	2.14881		6.52679	4.56585	8.14755	4.48262	4.18943		8.02291	8.21208	6.85499	10.3134	11.5345		8.71736	7.54607	10.4857	8.38398	8.43871
1.01954	1.0384	1.17815	1.10697	1.01721		2.83106	1.16605	1.05526	1.03979	3.32598		2.91868	2.73968	2.08775	2.15731	2.14213		6.51336	4.46418	8.06195	4.31381	4.21986		8.13656	8.27785	6.8553	10.3103	11.6731		8.72213	7.53675	10.3553	8.13418	8.05545
1.01573	1.03908	1.18059	1.08452	1.02456		2.85751	1.15558	1.05825	1.0469	3.27757		2.92364	2.73232	2.10437	2.09781	2.15453		6.52312	4.69187	8.26703	4.17783	4.23805		8.18336	8.23667	6.83609	10.3255	11.6277		8.81787	7.53094	10.5973	8.16051	8.10093
1.01724	1.03617	1.18161	1.04266	1.02525		2.82765	1.17457	1.0626	1.04957	3.33429		2.922	2.77036	2.09339	2.08471	2.1194		6.52464	4.39415	8.15019	4.27623	4.18929		8.00739	8.18892	6.8453	10.3143	11.7717		8.72172	7.53663	10.3745	8.35296	8.09905
1.01672	1.0373	1.18249	1.07539	1.01757		2.86485	1.18303	1.06295	1.04885	3.31586		2.9312	2.77841	2.08319	2.12127	2.14082		6.50219	4.48996	8.22151	4.28196	4.15738		8.15218	8.25061	6.81665	10.3215	11.6566		8.77982	7.5305	10.4795	8.23964	8.22507
1.02331	1.03881	1.18276	1.05003	1.01486		2.88535	1.1563	1.06384	1.05613	3.27951		2.93321	2.77549	2.05539	2.16607	2.14445		6.49864	4.49864	8.10559	4.33735	4.14494		8.12931	8.23943	6.81811	10.3398	11.5975		8.7149	7.52146	9.91714	8.58174	8.29679
1.01873	1.03791	1.18601	1.06107	1.02486		2.84013	1.14401	1.05979	1.04264	3.2372		2.93359	2.75899	2.07685	2.16173	2.13199		6.50154	4.3653	8.22272	4.45744	4.19999		8.14755	8.16714	6.82641	10.3288	11.4459		8.73931	7.52698	10.293	8.34889	8.3028
1.01975	1.03699	1.1941	1.03391	1.02879		2.8525	1.1493	1.05539	1.05997	3.27776		2.94268	2.75334	2.07623	2.1469	2.18576		6.48572	4.48607	8.04908	4.40034	4.12997		8.06195	8.2339	6.81072	10.3437	11.6072		8.67753	7.5253	10.038	8.25209	8.32442
1.02189	1.03905	1.19962	1.06672	1.02776		2.86081	1.14226	1.05548	1.05144	3.19085		2.94498	2.75293	2.08757	2.1795	2.18843		6.51579	4.50035	8.16615	4.41388	4.10176		8.26703	8.23474	6.83147	10.3199	11.7596		8.69472	7.51344	10.0175	8.55962	8.41319
1.01896	1.0385	1.19779	1.07422	1.03279		2.73543	1.15552	1.0627	1.04341	3.26762		2.95582	2.77977	2.10221	2.14823	2.19929		6.51102	4.28527	8.12442	4.36034	4.1258		8.15019	8.17053	6.81094	10.3047	11.4441		8.66778	7.51406	10.0315	8.48384	8.34994
1.01693	1.03752	1.19413	1.05484	1.02284		2.78751	1.17125	1.05673	1.04364	3.24618		2.96298	2.78548	2.10585	2.16124	2.1946		6.49619	4.6984	8.20426	4.45734	4.16016		8.22151	8.22242	6.82072	10.309	11.7466		8.60544	7.50615	9.99522	8.35728	8.1061
1.02118	1.03602	1.19053	1.06441	1.02357		2.75891	1.17973	1.05876	1.04004	3.1703		2.95126	2.78428	2.14129	2.15375	2.18758		6.51613	4.39075	7.99295	4.45014	4.16683		8.10559	8.22225	6.80864	10.2645	11.5657		8.65357	7.50838	10.1228	8.34677	8.22146
1.01424	1.03944	1.18755	1.05619	1.02318		2.74526	1.17144	1.05261	1.04751	3.1551		2.9606	2.78016	2.15973	2.15328	2.18431		6.4982	4.42992	8.1651	4.34651	4.17174		8.22272	8.19845	6.8102	10.2816	11.5638		8.77129	7.50512	10.0223	8.39611	7.9699
1.0154	1.03782	1.19233	1.04745	1.02757		2.79771	1.17303	1.05091	1.04385	3.19628		2.96272	2.7633	2.16478	2.18102	2.17952		6.48016	4.41509	8.03052	4.50449	4.11529		8.04908	8.22047	6.79206	10.247	11.7315		8.65737	7.51452	10.2249	8.11504	8.01211
1.0121	1.03741	1.20343	1.06235	1.02346		2.73362	1.16967	1.04886	1.05049	3.16524		2.96883	2.7811	2.182	2.17931	2.19009		6.46701	4.51001	8.10688	4.52431	4.08273		8.16615	8.23314	6.79749	10.2194	11.7219		8.66836	7.5144	9.97398	8.41806	8.17808
1.02222	1.03699	1.20255	1.09415	1.02921		2.76379	1.1664	1.05148	1.04457	3.21948		2.9512	2.76989	2.20085	2.17857	2.20137		6.49682	4.5304	8.21282	4.27798	4.08901		8.12442	8.19276	6.77927	10.2255	11.8301		8.71534	7.51267	10.2267	8.1297	8.25692
1.01253	1.03789	1.19732	1.04636	1.03263		2.8064	1.16879	1.05892	1.04082	3.18558		2.95528	2.78927	2.19977	2.1372	2.199		6.4718	4.4507	8.06387	4.27068	4.07606		8.20426	8.19765	6.80728	10.242	11.5513		8.66356	7.52081	10.0645	8.35288	8.39969
1.01947	1.03782	1.19272	1.06635	1.02893		2.83545	1.17184	1.04394	1.06066	3.11015		2.95911	2.80291	2.1962	2.14498	2.21442		6.49181	4.59088	8.17938	4.51169	4.11292		7.99295	8.22132	6.79218	10.2214	11.5517		8.62957	7.51197	9.77355	8.17553	8.04437
1.01828	1.03709	1.19638	1.0527	1.02879		2.74789	1.17186	1.04892	1.04187	3.16101		2.94994	2.81185	2.17622	2.17489	2.18771		6.47781	4.37696	8.16809	4.28346	4.19867		8.1651	8.20389	6.78366	10.251	11.6732		8.73855	7.51761	10.0613	8.14152	8.25903
1.02112	1.04051	1.19064	1.08237	1.03568		2.83057	1.15498	1.06248	1.04459	3.16788		2.95609	2.82278	2.18629	2.16267	2.18082		6.46675	4.62535	8.11157	4.22246	4.17829		8.03052	8.21164	6.81284	10.2561	11.6917		8.52977	7.50296	9.953	8.19444	8.14259
1.01133	1.03735	1.18799	1.08735	1.03674		2.79996	1.1684	1.05641	1.04374	3.18193		2.95973	2.82011	2.15754	2.17763	2.23387		6.47092	4.61961	7.91421	4.46546	4.09685		8.10688	8.23668	6.80441	10.2487	11.4936		8.60659	7.50781	10.1417	8.23847	8.2455
1.01189	1.03734	1.18226	1.07336	1.02997		2.8314	1.18564	1.05547	1.05151	3.21767		2.958	2.79581	2.14398	2.18294	2.22773		6.45286	4.53247	8.08695	4.41787	4.10278		8.21282	8.26654	6.7868	10.2371	11.8077		8.67149	7.52361	10.1426	8.30509	8.30427
1.01158	1.03689	1.18433	1.07028	1.02627		2.81393	1.184	1.04514	1.04159	3.14412		2.96284	2.8097	2.14547	2.16302	2.19721		6.46334	4.59928	8.10761	4.46198	4.14918		8.06387	8.21478	6.81911	10.2227	11.6503		8.78804	7.50673	10.1081	8.14018	8.23156
1.01599	1.03617	1.1821	1.05925	1.02804		2.79961	1.19799	1.05558	1.0502	3.15095		2.95723	2.80296	2.12944	2.17856	2.20812		6.45706	4.26432	8.10097	4.30309	4.19128		8.17938	8.22265	6.8019	10.2288	11.3537		8.83519	7.51178	10.0242	8.42959	8.33143
1.00969	1.03492	1.18742	1.04856	1.02481		2.85046	1.1896	1.05089	1.04977	3.11233		2.97199	2.77972	2.13705	2.17698	2.21641		6.46934	4.57293	8.25468	4.37219	4.22593		8.16809	8.23553	6.78477	10.2209	11.3321		8.94809	7.49491	9.91505	8.22463	8.37785
1.02258	1.03519	1.18515	1.04894	1.03303		2.8541	1.18559	1.05136	1.04135	3.21136		2.9796	2.82855	2.15486	2.18506	2.22971		6.44345	4.41712	8.10106	4.23549	4.2928		8.11157	8.21597	6.79183	10.2266	11.4641		8.97341	7.48802	9.89761	8.2101	8.10275
1.01599	1.0339	1.18343	1.05765	1.03724		2.82991	1.16558	1.05567	1.05371	3.17737		2.98544	2.82281	2.15463	2.1748	2.22248		6.44448	4.4389	8.15425	4.57045	4.30598		7.91421	8.22432	6.77502	10.2233	11.3116		9.05001	7.48419	9.78154	8.43781	7.8769
1.01286	1.03268	1.18474	1.06233	1.03564		2.74946	1.17088	1.06106	1.05537	3.20832		2.98507	2.80402	2.14212	2.18362	2.21321		6.43587	4.30194	8.00208	4.31657	4.40264		8.08695	8.21508	6.77373	10.2109	11.3982		9.05028	7.48011	10.0228	8.30689	8.1723
1.02149	1.03559	1.18009	1.03433	1.04096		2.81398	1.17115	1.04604	1.0427	3.10859		2.9935	2.8006	2.1753	2.14787	2.21153		6.40703	4.376	7.97469	4.37183	4.47582		8.10761	8.20451	6.80285	10.2193	11.4213		9.10987	7.48937	10.2574	8.08487	8.08829
1.00833	1.03572	1.17832	1.05911	1.03562		2.76466	1.17604	1.05842	1.05529	3.11802		2.98907	2.80438	2.16839	2.19583	2.21282		6.4104	4.54272	8.08096	4.28312	4.43822		8.10097	8.19468	6.78012	10.2081	11.5644		9.03839	7.4842	10.1469	8.55232	8.04914
1.0137	1.03459	1.19242	1.06549	1.04389		2.74731	1.16818	1.04647	1.04604	3.1454		2.98564	2.80875	2.13729	2.1587	2.16547		6.45702	4.4509	8.21863	4.23206	4.47405		8.25468	8.22705	6.76342	10.2023	11.6844		9.1646	7.50296	10.1069	8.43213	8.03453
1.00985	1.03615	1.19522	1.08309	1.03816		2.70785	1.18311	1.04212	1.03741	3.11591		2.98988	2.81849	2.15899	2.19791	2.21387		6.43729	4.40289	7.96072	4.38244	4.50399		8.10106	8.21161	6.79739	10.2186	11.7307		9.09801	7.49205	10.3064	8.21936	8.4289
1.01595	1.03628	1.2305	1.10555	1.0357		2.77888	1.19044	1.0534	1.05089	3.0816		2.98231	2.80815	2.1486	2.17546	2.22044		6.45714	4.44347	7.90862	4.49314	4.65983		8.15425	8.1827	6.76394	10.2052	11.5235		9.05163	7.50754	10.1222	8.46837	8.14292
1.01903	1.03368	1.23991	1.055	1.03685		2.76915	1.18397	1.0475	1.04846	3.10821		2.98382	2.81932	2.14725	2.18303	2.17457		6.43942	4.3834	8.08623	4.48142	4.58063		8.00208	8.20712	6.77179	10.1959	11.3917		9.16659	7.49287	10.0446	8.18649	7.93054
1.00875	1.0337	1.23816	1.08285	1.03198		2.73049	1.19572	1.04335	1.05208	3.08548		2.98631	2.82264	2.14633	2.16376	2.21488		6.46624	4.48281	7.97515	4.54411	4.62215		7.97469	8.19185	6.77921	10.2126	11.686		8.9876	7.49471	10.0408	8.29806	7.84446
1.01234	1.03419	1.24225	1.07642	1.03961		2.76182	1.19076	1.04533	1.04323	3.12919		2.97437	2.82615	2.12589	2.20463	2.19024		6.44037	4.31924	8.23274	4.38658	4.60498		8.08096	8.20583	6.77112	10.1624	11.5579		9.22208	7.49576	9.97853	8.38677	8.06937
1.01406	1.03564	1.23663	1.02978	1.03007		2.78293	1.19299	1.05462	1.05085	3.06817		2.97732	2.84601	2.13972	2.19471	2.17084		6.46035	4.47823	8.00779	4.39939	4.53956		8.21863	8.18507	6.75932	10.1547	11.3829		9.1467	7.49404	9.88477	8.27057	7.98838
1.01643	1.03373	1.23689	1.05402	1.0301		2.78038	1.18126	1.04933	1.05118	3.10454		2.99774	2.82377	2.14465	2.16796	2.18734		6.45008	4.67036	8.21794	4.49972	4.49357		7.96072	8.18502	6.75256	10.1782	11.5218		9.13648	7.48609	9.75489	8.39858	8.1059
1.01282	1.03459	1.22664	1.08064	1.0313		2.79545	1.17085	1.03528	1.03945	3.13434		3.00748	2.82881	2.18235	2.12772	2.18129		6.44965	4.47234	8.07688	4.33439	4.3793		7.90862	8.20186	6.76218	10.1629	11.3658		9.16272	7.48222	9.84237	8.29222	7.93957
1.01257	1.03315	1.23054	1.04553	1.02514		2.81399	1.17575	1.04314	1.0489	3.14455		2.99703	2.8429	2.16465	2.1628	2.1882		6.4649	4.42795	8.05261	4.59005	4.3349		8.08623	8.18858	6.75355	10.1695	11.3258		9.14183	7.4753	10.0573	8.17747	8.23971
1.00992	1.03527	1.21538	1.06084	1.01973		2.86245	1.16157	1.04309	1.03702	3.17206		3.00712	2.81826	2.18031	2.20104	2.168		6.45247	4.5254	8.23042	4.4222	4.42788		7.97515	8.20482	6.773	10.1773	11.62		9.16875	7.47288	10.0017	8.29508	8.11416
1.01352	1.03477	1.22267	1.04787	1.02361		2.84328	1.15179	1.04103	1.047	3.16224		3.0128	2.84575	2.2242	2.20259	2.22035		6.43028	4.41206	8.04149	4.6678	4.36915		8.23274	8.21476	6.74363	10.1675	11.4572		9.14298	7.4723	10.1758	8.46779	7.89272
1.01333	1.03595	1.21744	1.0579	1.02902		2.82249	1.15991	1.04445	1.03591	3.15396		3.00726	2.83021	2.24048	2.20955	2.18228		6.45112	4.44843	7.96963	4.28715	4.33481		8.00779	8.1858	6.73499	10.1655	11.3036		9.10744	7.47661	10.0984	8.34985	8.35645
1.02078	1.03583	1.21551	1.07938	1.02196		2.85194	1.15288	1.04244	1.04743	3.18655		2.99984	2.84381	2.26608	2.20824	2.21088		6.46015	4.44807	8.11208	4.58054	4.20197		8.21794	8.19044	6.75552	10.1719	11.4819		9.15306	7.47362	10.0936	8.35096	8.12254
1.00984	1.03529	1.22088	1.07734	1.01953		2.80841	1.1573	1.04194	1.04736	3.18686		3.02146	2.86918	2.26487	2.19896	2.24904		6.43808	4.27344	8.02612	4.50921	4.22606		8.07688	8.20967	6.75205	10.1285	11.4415		9.14079	7.47522	10.143	8.29931	8.17182
1.01618	1.03553	1.20849	1.0755	1.01531		2.82713	1.15231	1.03198	1.05183	3.17107		3.01259	2.85694	2.24206	2.23116	2.19898		6.4322	4.54823	8.05818	4.39054	4.29849		8.05261	8.20983	6.75131	10.1712	11.2957		9.14948	7.47652	10.0114	8.11931	8.11934
1.01274	1.03496	1.21339	1.03289	1.03109		2.90633	1.16731	1.04041	1.05425	3.15385		3.02329	2.8555	2.25012	2.26205	2.22531		6.43018	4.47841	8.04948	4.57134	4.21502		8.23042	8.19718	6.7566	10.1527	11.6117		9.16823	7.47197	9.93338	8.15794	7.75953
1.0072	1.03508	1.2148	1.02368	1.02618		2.77561	1.17459	1.04573	1.04018	3.18323		3.03515	2.87397	2.24011	2.24951	2.24865		6.44538	4.40795	8.12398	4.43084	4.12848		8.04149	8.18427	6.75463	10.139	11.4669		9.12053	7.47148	10.0535	8.11406	7.81029
1.01199	1.03505	1.233	1.03185	1.01981		2.77375	1.17321	1.03781	1.05321	3.18488		3.02431	2.86194	2.2483	2.24301	2.23342		6.45037	4.49312	7.92941	4.36635	4.16905		7.96963	8.17559	6.76993	10.1503	11.4607		9.17344	7.45902	10.0389	8.27409	7.86612
1.00436	1.03467	1.26741	1.06286	1.02729		2.79329	1.1741	1.0459	1.05085	3.15368		3.03073	2.87339	2.24068	2.23236	2.21892		6.43981	4.57376	8.04213	4.4232	4.21863		8.11208	8.18138	6.75255	10.171	11.2952		9.08779	7.46412	9.90198	8.04054	7.99939
1.0137	1.03255	1.28295	1.0771	1.02104		2.82399	1.18561	1.045	1.04022	3.12047		3.02905	2.83284	2.20787	2.22389	2.25267		6.44543	4.34181	8.11816	4.35722	4.17952		8.02612	8.20293	6.7698	10.1134	11.3149		9.12285	7.45265	9.88849	8.37276	8.27983
1.01355	1.0344	1.29625	1.06156	1.0309		2.80042	1.18376	1.04898	1.04728	3.13622		3.04201	2.84636	2.21025	2.22424	2.28994		6.45121	4.70903	8.11739	4.64608	4.14247		8.05818	8.19189	6.74494	10.1357	11.4526		9.01926	7.46134	10.1775	8.03382	8.3249
1.01375	1.03229	1.30722	1.05331	1.02303		2.79218	1.18592	1.0434	1.046	3.14939		3.03363	2.85191	2.20059	2.20012	2.22693		6.43049	4.39621	8.04213	4.48402	4.19896		8.04948	8.17991	6.74743	10.1542	11.428		9.17537	7.44493	10.0161	8.19476	8.07481
1.01658	1.03198	1.31411	1.05475	1.01721		2.74927	1.17423	1.05001	1.05436	3.15257		3.04287	2.88436	2.18754	2.24611	2.25878		6.45592	4.47063	7.95196	4.32421	4.08645		8.12398	8.20616	6.75034	10.1536	11.4265		9.22857	7.46152	10.2361	8.15613	7.879
1.02474	1.03297	1.32087	1.05052	1.01485		2.7965	1.16975	1.05143	1.04349	3.13735		3.05424	2.88875	2.19454	2.19555	2.27334		6.43199	4.31508	8.15009	4.4687	4.01392		7.92941	8.20734	6.7647	10.1173	11.418		9.16604	7.44946	10.0976	7.92456	8.26856
1.01394	1.0328	1.32249	1.06096	1.01875		2.76382	1.1807	1.04848	1.05337	3.20452		3.05191	2.8799	2.19301	2.23072	2.26687		6.42848	4.546	8.10015	4.42195	4.10036		8.04213	8.17388	6.71133	10.1181	11.3943		9.14703	7.45917	10.0512	8.14461	8.12181
1.00906	1.03156	1.3161	1.03931	1.02823		2.71142	1.17767	1.03798	1.05164	3.22786		3.05201	2.87833	2.18215	2.23399	2.25337		6.42788	4.45014	8.02671	4.25295	4.14121		8.11816	8.217	6.73276	10.097	11.3781		9.10054	7.44307	9.95785	8.37481	8.19233
1.01411	1.03255	1.32152	1.07163	1.02074		2.70953	1.17614	1.03825	1.05148	3.18199		3.05788	2.89657	2.19145	2.22345	2.25865		6.44191	4.44247	8.04053	4.33211	4.13703		8.11739	8.19467	6.74571	10.0525	11.2493		9.05404	7.4343	10.0786	8.08126	7.98546
1.0145	1.03244	1.3269	1.04999	1.02623		2.75694	1.18637	1.04147	1.03464	3.27106		3.05918	2.88702	2.20018	2.24404	2.25485		6.44204	4.36184	8.02868	4.34311	4.13122		8.04213	8.18083	6.73768	10.0715	11.4921		9.11712	7.44584	9.92556	8.12946	7.67607
1.00836	1.03246	1.32109	1.07678	1.02527		2.74468	1.19297	1.04286	1.05015	3.25206		3.07238	2.87182	2.20239	2.23146	2.29208		6.46004	4.37904	7.90528	4.22954	4.09828		7.95196	8.20106	6.73565	10.0469	11.5344		9.04412	7.43097	10.0282	8.0878	7.93716
1.01679	1.03135	1.33118	1.07421	1.0288		2.73595	1.17406	1.04176	1.0544	3.24474		3.0619	2.8743	2.18726	2.24126	2.27144		6.46219	4.37858	8.01688	4.29734	4.07409		8.15009	8.20213	6.73579	10.0719	11.1829		9.02508	7.4422	10.2057	8.42445	8.13603
1.01342	1.03266	1.33841	1.07205	1.0267		2.75744	1.19234	1.04802	1.0515	3.22605		3.07185	2.88676	2.19299	2.24053	2.24932		6.46175	4.28548	8.007	4.61249	4.01543		8.10015	8.17545	6.73131	10.0811	11.6478		9.12896	7.42942	9.97992	8.17252	7.78813
1.01119	1.03126	1.34448	1.05732	1.02787		2.7597	1.19559	1.04853	1.05244	3.15364		3.06729	2.89283	2.19408	2.25953	2.29607		6.45856	4.43525	7.99726	4.59286	4.01846		8.02671	8.17248	6.72218	10.1032	11.334		9.05747	7.44533	10.0803	8.03116	7.78712
1.0251	1.03058	1.34394	1.07588	1.0283		2.78871	1.20108	1.04109	1.05027	3.15149		3.06619	2.89297	2.19825	2.25111	2.31774		6.44926	4.43186	7.96624	4.42976	3.99728		8.04053	8.20875	6.74355	10.106	11.4679		9.05231	7.45045	10.1694	8.3052	7.81543
1.01511	1.03181	1.34081	1.08396	1.0234		2.77145	1.18879	1.03787	1.05402	3.1386		3.09025	2.90468	2.19884	2.24542	2.31367		6.45331	4.49136	7.93153	4.48399	4.13778		8.02868	8.15521	6.73085	10.0802	11.4806		9.03912	7.43701	10.0104	8.09704	7.73842
1.01346	1.0303	1.33497	1.05919	1.02727		2.78794	1.18769	1.03352	1.05592	3.13707		3.0994	2.90906	2.18839	2.21727	2.27253		6.45191	4.45305	7.96336	4.21729	4.06914		7.90528	8.19179	6.73247	10.0907	11.3573		9.1784	7.42476	10.0289	8.38264	7.89425
1.02788	1.03171	1.33958	1.06281	1.03144		2.80426	1.18175	1.04049	1.04997	3.11491		3.08464	2.90377	2.19603	2.23298	2.28141		6.43246	4.36106	8.10994	4.50359	4.03967		8.01688	8.22826	6.74165	10.074	11.3172		9.10365	7.4145	10.1336	8.37734	7.657
1.0182	1.02977	1.34304	1.0662	1.03173		2.77611	1.1775	1.04379	1.05244	3.10652		3.09236	2.8968	2.17636	2.26311	2.27953		6.44515	4.48492	7.98956	4.4919	4.00837		8.007	8.18833	6.71411	10.1079	11.4337		9.09557	7.42565	9.93257	8.23239	7.65073
1.01574	1.03118	1.34352	1.06222	1.02909		2.73981	1.18479	1.03943	1.05129	3.12042		3.08449	2.93071	2.18207	2.27555	2.29086		6.44025	4.28422	8.04444	4.58486	4.04322		7.99726	8.18836	6.72764	10.1038	11.2881		9.10454	7.4148	9.87877	8.17958	7.61954
1.0244	1.03089	1.33501	1.06168	1.01906		2.81473	1.17731	1.03213	1.05307	3.08089		3.0888	2.9369	2.17865	2.25555	2.26293		6.42886	4.46909	7.9521	4.50353	4.12784		7.96624	8.20638	6.73644	10.0683	11.3137		9.11053	7.41536	10.0655	8.36044	7.53362
1.01266	1.03105	1.3446	1.08603	1.02728		2.77648	1.16937	1.04334	1.05276	3.09524		3.08461	2.92783	2.20028	2.27109	2.22854		6.43226	4.52769	7.96953	4.41602	3.98879		7.93153	8.18371	6.72437	10.0887	11.5903		9.12604	7.42296	10.0483	8.36654	7.43466
1.01586	1.02951	1.35039	1.09709	1.02684		2.79544	1.18904	1.05066	1.05406	3.05544		3.09414	2.90128	2.22764	2.25997	2.24521		6.42521	4.2658	7.97345	4.32215	4.0163		7.96336	8.17643	6.72693	10.0542	11.4885		9.03266	7.39906	10.1191	8.32208	7.2466
1.00832	1.02951	1.34944	1.07412	1.02243		2.75478	1.20021	1.05568	1.05102	3.07118		3.0902	2.91949	2.22902	2.28005	2.28897		6.43223	4.46943	8.02992	4.33206	3.95296		8.10994	8.21479	6.72224	10.0439	11.2172		9.09318	7.40082	10.048	8.45821	7.53608
1.0207	1.03094	1.33785	1.04946	1.02349		2.74118	1.18017	1.06355	1.05588	3.07494		3.10934	2.89238	2.22382	2.28128	2.25982		6.43979	4.43288	8.02536	4.48911	4.00788		7.98956	8.18617	6.70606	10.0974	11.191		9.07472	7.41112	10.008	8.49293	7.46057
1.0151	1.03138	1.35837	1.09162	1.0272		2.76777	1.16856	1.0646	1.05434	3.06057		3.11127	2.93709	2.25468	2.29492	2.24917		6.43706	4.44697	7.79714	4.38729	4.01066		8.04444	8.18505	6.72487	10.0365	11.0472		9.08494	7.39959	10.1989	8.41141	7.89896
1.01923	1.03038	1.35604	1.0908	1.0198		2.79721	1.17565	1.06295	1.04108	3.07958		3.11297	2.92677	2.24964	2.2957	2.2436		6.4202	4.55942	7.70837	4.61375	4.02458		7.9521	8.20812	6.71929	9.99937	11.3204		9.01443	7.39791	9.93903	8.51578	7.61147
1.02287	1.03142	1.35602	1.06422	1.02153		2.81259	1.19824	1.04333	1.05319	3.04038		3.11288	2.92706	2.25083	2.2604	2.24777		6.42454	4.28145	8.02555	4.57097	4.05482		7.96953	8.18135	6.69193	10.0403	11.1797		9.04956	7.38435	10.1288	8.35887	7.47584
1.01338	1.02932	1.35143	1.07677	1.02715		2.76017	1.19148	1.05036	1.05103	3.11531		3.11556	2.92234	2.25358	2.27019	2.23805		6.43786	4.44808	7.95914	4.56088	4.06014		7.97345	8.16213	6.69328	10.0134	11.1851		9.10818	7.3971	9.91195	8.58552	7.59941
1.01632	1.02857	1.35276	1.08555	1.02713		2.83699	1.19339	1.07523	1.04478	3.12305		3.12279	2.93379	2.25565	2.29171	2.2754		6.44204	4.39658	7.94257	4.63901	4.07157		8.02992	8.22938	6.71228	9.99202	11.3168		9.09001	7.39328	10.032	8.51617	7.18995
1.01784	1.02945	1.35362	1.04307	1.02898		2.84162	1.18003	1.07737	1.04651	3.16333		3.12543	2.92508	2.23368	2.25775	2.27823		6.44336	4.4796	7.94506	4.39325	3.98199		8.02536	8.17061	6.69973	10.0289	11.2766		9.12381	7.40221	10.0724	8.5364	7.23702
1.02248	1.02897	1.35773	1.09124	1.02594		2.80928	1.17965	1.07062	1.05276	3.09138		3.12149	2.97635	2.21735	2.28294	2.24925		6.43606	4.4703	7.94689	4.54922	4.07918		7.79714	8.1728	6.72016	9.99743	11.1523		9.14405	7.39057	9.99186	8.26786	7.41668
1.01655	1.02812	1.34285	1.05374	1.03087		2.77182	1.18047	1.06294	1.05065	3.13275		3.13703	2.95856	2.21572	2.28721	2.29672		6.42763	4.42836	8.0253	4.38082	4.08194		7.70837	8.20004	6.69587	9.96178	11.15		9.12751	7.38597	10.1927	8.52603	7.45078
1.01763	1.02858	1.34936	1.07541	1.02234		2.75518	1.17857	1.05459	1.05565	3.10303		3.15206	2.94201	2.21032	2.28078	2.32142		6.42554	4.21815	8.03707	4.56193	4.06078		8.02555	8.1948	6.7257	10.0015	11.4358		9.08846	7.38881	10.0874	8.4717	7.7189
1.01686	1.02974	1.3497	1.07864	1.01408		2.85426	1.17491	1.05092	1.05379	3.09223		3.14759	2.95073	2.20661	2.27934	2.30245		6.42077	4.47216	7.93979	4.53555	4.08645		7.95914	8.16104	6.71152	10.0179	11.5511		9.09886	7.39006	10.0308	8.28466	7.41105
1.01578	1.02761	1.35214	1.11569	1.02212		2.80604	1.19098	1.04859	1.0532	3.15694		3.16338	2.94113	2.23672	2.29313	2.31376		6.42407	4.39287	7.83925	4.19733	4.17602		7.94257	8.19266	6.71799	9.99813	11.255		9.12098	7.37867	9.89171	8.5546	7.4911
1.01763	1.02886	1.34658	1.05575	1.01703		2.77325	1.18684	1.04655	1.04293	3.10682		3.16621	2.956	2.22698	2.31143	2.32857		6.43132	4.44061	7.98097	4.5236	4.13629		7.94506	8.17259	6.72649	10.0531	11.4198		9.12649	7.39515	9.92226	8.53736	7.34338
1.00911	1.02981	1.35219	1.08608	1.01761		2.75396	1.18802	1.04912	1.04875	3.07939		3.15675	2.97213	2.22909	2.28919	2.31856		6.38103	4.41612	8.00536	4.38852	4.04409		7.94689	8.15728	6.73069	10.0462	11.1545		9.1204	7.37632	10.097	8.44035	7.37083
1.02649	1.02948	1.36081	1.08843	1.01357		2.75546	1.17959	1.04236	1.04311	3.11101		3.15172	2.98981	2.22084	2.23887	2.31488		6.4008	4.50106	7.92521	4.35536	3.99022		8.0253	8.2194	6.71959	10.0075	11.3953		9.15552	7.38203	10.1409	8.53676	7.34349
1.01811	1.02845	1.35764	1.07405	1.02197		2.75912	1.17996	1.04627	1.04462	3.09214		3.16274	2.98082	2.23271	2.26551	2.32016		6.41314	4.49012	7.95804	4.3821	4.1034		8.03707	8.20264	6.73762	10.0458	11.4898		9.18597	7.39556	10.1096	8.50867	7.69113
1.02333	1.03189	1.35637	1.0883	1.01846		2.83433	1.16103	1.03057	1.04605	3.11836		3.15776	2.9579	2.23558	2.27908	2.30962		6.42416	4.24804	8.08951	4.54553	4.10008		7.93979	8.16273	6.73592	10.0339	10.954		9.05828	7.40377	10.0842	8.55181	7.27563
1.01589	1.03006	1.36264	1.08415	1.01738		2.79805	1.17087	1.04684	1.0553	3.10665		3.15559	2.96873	2.2417	2.28258	2.29022		6.41328	4.31929	7.98362	4.31374	4.00311		7.83925	8.20529	6.72989	10.0172	10.9191		9.07428	7.47438	9.98833	8.49672	7.49514
1.01456	1.02919	1.35973	1.08108	1.01123		2.76831	1.17413	1.04347	1.05064	3.10176		3.15999	2.97686	2.22927	2.29987	2.28845		6.42758	4.50432	7.83545	4.54784	4.06541		7.98097	8.20796	6.70473	10.0146	11.3593		9.07201	7.49887	10.1184	8.14022	7.33053
1.0147	1.02875	1.36733	1.07972	1.01785		2.86608	1.17802	1.04059	1.05648	3.07329		3.15154	2.96909	2.23095	2.32796	2.27887		6.42913	4.3257	7.83177	4.41912	4.12205		8.00536	8.14395	6.69508	10.0352	11.2188		9.09324	7.54405	10.153	8.35221	7.28517
1.01777	1.02834	1.36904	1.0981	1.01598		2.85247	1.17893	1.04165	1.04574	3.10088		3.15682	2.97424	2.23521	2.31994	2.30998		6.40726	4.44339	8.02983	4.30769	4.13594		7.92521	8.19086	6.68889	9.99896	11.191		9.1194	7.58099	10.0749	8.57327	7.4455
1.0167	1.02835	1.36018	1.07961	1.0161		2.86956	1.17832	1.04152	1.05538	3.16641		3.15626	2.95933	2.2168	2.31967	2.30153		6.40227	4.55205	7.85997	4.27181	4.03465		7.95804	8.18188	6.67972	9.96301	11.0485		9.06586	7.60238	10.1359	8.61426	7.42026
1.01082	1.02957	1.35501	1.08423	1.01704		2.90511	1.1686	1.04837	1.04522	3.20915		3.165	2.965	2.22103	2.3017	2.30897		6.41073	4.50051	7.91795	4.31661	4.05961		8.08951	8.16613	6.68937	10.007	11.4695		9.01892	7.60969	10.1093	8.31115	7.1595
1.02073	1.02963	1.35109	1.0922	1.01261		2.88921	1.15408	1.04508	1.05184	3.16485		3.16813	3.01121	2.22485	2.2721	2.30025		6.39896	4.45866	7.83935	4.38141	4.03515		7.98362	8.16319	6.66758	9.9871	11.1836		9.08286	7.62631	9.97083	8.34103	7.32756
1.02065	1.02976	1.36419	1.07122	1.01529		2.84062	1.16569	1.03598	1.05673	3.27658		3.17061	3.00638	2.21109	2.2613	2.27274		6.41785	4.18268	7.86765	4.28819	4.04617		7.83545	8.1991	6.69183	9.99934	11.1917		8.98704	7.62079	10.1497	8.44346	7.35996
1.01928	1.0276	1.35642	1.08713	1.00751		2.84424	1.1511	1.03569	1.05047	3.23867		3.17107	2.96925	2.21061	2.29174	2.27601		6.41402	4.34871	7.73394	4.41705	4.06324		7.83177	8.16926	6.69138	9.98532	10.9163		9.10583	7.63141	9.93841	8.44674	7.11139
1.01938	1.02902	1.35675	1.07716	1.00989		2.90763	1.15419	1.035	1.04266	3.21105		3.16592	3.00399	2.20691	2.30542	2.32783		6.41501	4.43472	8.014	4.37471	4.13316		8.02983	8.16568	6.68002	9.9663	11.33		9.1243	7.62284	10.0446	8.37213	7.26799
1.00189	1.02844	1.34353	1.08515	1.01052		2.81906	1.15484	1.04613	1.05493	3.22713		3.16611	3.03215	2.20234	2.32004	2.27126		6.41283	4.37059	7.75924	4.33808	4.13892		7.85997	8.2063	6.70083	9.96318	11.2988		9.0471	7.64082	10.1099	8.44056	7.48174
1.01888	1.0275	1.33443	1.05556	1.00627		2.82232	1.1521	1.04784	1.04545	3.24298		3.17295	2.99354	2.18678	2.29093	2.25833		6.39498	4.42454	7.89229	4.33124	4.08638		7.91795	8.16559	6.70488	9.9758	11.1705		9.05184	7.62892	10.1176	8.47107	7.49822
1.0203	1.02871	1.3327	1.09258	1.01033		2.82356	1.14938	1.04739	1.05038	3.18987		3.14923	2.98749	2.18617	2.31184	2.25311		6.41415	4.50514	7.94171	4.53751	4.11422		7.83935	8.16369	6.67784	9.96697	11.0602		9.09503	7.63039	10.0618	8.47644	7.46282
1.02004	1.02675	1.32064	1.09532	1.01927		2.8268	1.16225	1.05064	1.05205	3.14991		3.16241	2.99236	2.20524	2.32036	2.26079		6.40671	4.5116	8.00533	4.53772	4.04928		7.86765	8.17293	6.67983	9.98412	11.1918		9.07485	7.63987	10.0788	8.58766	7.16992
1.00591	1.02749	1.32441	1.07326	1.02357		2.83397	1.18299	1.05466	1.05299	3.17787		3.16602	3.011	2.21771	2.3176	2.24299		6.41151	4.34942	7.98285	4.54439	4.0264		7.73394	8.17888	6.67732	10.0052	11.4558		8.98781	7.63971	10.1951	8.54462	7.367
1.00961	1.02656	1.32049	1.08448	1.02176		2.84517	1.16954	1.05223	1.05034	3.19388		3.17122	3.01315	2.22309	2.30647	2.27266		6.41356	4.48451	8.11552	4.49828	4.01009		8.014	8.15571	6.67643	9.96505	11.0109		9.07239	7.61835	9.77479	8.4092	7.3755
1.0146	1.02567	1.31331	1.05175	1.02758		2.78696	1.1507	1.05389	1.04903	3.20398		3.16858	3.04183	2.21627	2.35003	2.28866		6.4044	4.45783	7.94239	4.36138	4.02306		7.75924	8.16366	6.68175	9.97221	11.14		9.06682	7.63371	9.85832	8.25955	7.31239
1.01974	1.02696	1.31433	1.07507	1.02217		2.79088	1.14642	1.05997	1.04491	3.13486		3.17525	3.03249	2.21087	2.31857	2.32488		6.40733	4.46748	7.77513	4.33011	4.04436		7.89229	8.15563	6.68964	10.0294	11.4011		9.05021	7.62457	9.88424	8.47514	7.43248
1.01238	1.02564	1.29844	1.08077	1.02158		2.75244	1.16918	1.05597	1.06296	3.18952		3.17549	3.05737	2.21468	2.32927	2.33221		6.42412	4.25501	7.89836	4.34457	4.02081		7.94171	8.14157	6.65893	9.95579	11.1469		9.09873	7.6161	9.9088	8.41191	7.35194
1.01501	1.0269	1.30288	1.08084	1.01438		2.74878	1.15337	1.05587	1.05437	3.17607		3.17108	3.0128	2.21109	2.35454	2.34585		6.41466	4.51617	8.01117	4.30614	4.04095		8.00533	8.15169	6.67751	9.98143	11.1449		9.08891	7.62916	9.91227	8.46384	7.31388
1.01812	1.02705	1.30379	1.09488	1.03026		2.71501	1.14684	1.05698	1.05446	3.17238		3.17816	3.01056	2.21217	2.33276	2.3503		6.41829	4.59554	7.94632	4.36604	4.06991		7.98285	8.16373	6.68334	9.99636	11.2559		9.08475	7.6269	9.90325	8.50401	7.07584
1.01435	1.02734	1.29286	1.10711	1.02894		2.75408	1.15307	1.05235	1.05123	3.16118		3.18117	3.01329	2.23786	2.31918	2.3248		6.39002	4.47028	8.03202	4.46962	4.09406		8.11552	8.12874	6.65505	9.96725	11.253		9.01938	7.62164	9.99835	8.71433	7.37284
1.01734	1.02826	1.28719	1.09684	1.03148		2.73553	1.14499	1.05096	1.04974	3.23909		3.1915	2.99865	2.24348	2.32334	2.32843		6.41541	4.48726	7.87835	4.42162	4.01534		7.94239	8.13011	6.66079	9.9551	11.0842		9.01053	7.61263	9.87851	8.51345	7.58907
1.00991	1.02795	1.28745	1.0917	1.01926		2.72922	1.15493	1.05494	1.03876	3.17211		3.18626	3.01696	2.25312	2.34564	2.37812		6.40716	4.38282	7.82436	4.48345	4.12552		7.77513	8.13955	6.65242	9.97447	11.0887		8.98732	7.61845	10.0414	8.65918	7.3412
1.01353	1.02736	1.28095	1.08698	1.02289		2.7652	1.17661	1.05356	1.06022	3.21831		3.19152	3.01586	2.25936	2.33202	2.32927		6.3884	4.54221	7.81628	4.459	4.08591		7.89836	8.12623	6.64775	9.97255	11.3977		9.05891	7.6212	9.94264	8.56749	6.82142
1.01369	1.02606	1.27959	1.07551	1.01276		2.80098	1.19669	1.0476	1.04176	3.17741		3.17163	2.99898	2.26173	2.30789	2.36323		6.39436	4.4827	7.907	4.50705	4.13322		8.01117	8.13955	6.63977	9.96522	11.1163		9.15246	7.60481	9.93271	8.53512	6.88721
1.0145	1.02707	1.2685	1.10342	1.0236		2.72922	1.19422	1.06293	1.03697	3.19866		3.18182	3.01688	2.25795	2.32551	2.31536		6.3711	4.36619	7.9108	4.30201	4.02334		7.94632	8.13287	6.66695	9.97116	11.0711		9.01652	7.60641	9.94467	8.47437	7.08871
1.01602	1.02847	1.26898	1.09865	1.01325		2.7364	1.19312	1.05582	1.05023	3.25225		3.19296	3.00279	2.27301	2.34573	2.35864		6.40307	4.29643	7.79172	4.38414	4.05784		8.03202	8.12293	6.64977	9.96851	10.9645		9.10474	7.57917	10.0494	8.28189	7.54009
1.01479	1.02705	1.26907	1.07371	1.01003		2.77438	1.18509	1.0588	1.04486	3.18769		3.19002	3.06027	2.26632	2.34045	2.36579		6.39837	4.45137	7.93332	4.35134	4.1051		7.87835	8.13078	6.64124	9.92695	11.0736		9.08456	7.58125	9.94413	8.35516	7.46019
1.01723	1.02413	1.2697	1.07691	1.00748		2.74546	1.18813	1.06007	1.05261	3.19418		3.19737	3.02345	2.28297	2.34982	2.3498		6.38352	4.50188	7.983	4.54103	4.05541		7.82436	8.14449	6.63994	9.9634	11.3691		9.13214	7.57794	10.0609	8.38167	7.34817
1.02069	1.02456	1.26483	1.09276	1.0119		2.70399	1.17817	1.05677	1.05592	3.17318		3.21085	3.03649	2.28154	2.32951	2.38368		6.37456	4.30142	7.70504	4.3511	4.11187		7.81628	8.13125	6.62951	9.93972	10.9305		9.09183	7.57484	9.90055	8.49121	7.04011
1.01067	1.02448	1.26298	1.09761	1.00936		2.77542	1.16357	1.05321	1.04266	3.22941		3.21175	3.03705	2.27324	2.3594	2.39066		6.38019	4.44435	8.01771	4.38794	4.07167		7.907	8.12441	6.63987	9.92888	11.2126		9.09435	7.57445	10.2109	8.59584	7.00021
1.00805	1.02605	1.25479	1.09189	1.01254		2.84033	1.17865	1.05336	1.06009	3.21121		3.21659	3.03938	2.25564	2.34978	2.38633		6.39428	4.50413	7.86871	4.27676	4.08045		7.9108	8.14196	6.6364	9.94117	11.3093		8.96195	7.57777	10.1194	8.4667	7.10496
1.01674	1.02257	1.25678	1.07754	1.00719		2.81748	1.17274	1.05295	1.05154	3.22093		3.2304	3.03989	2.26029	2.34614	2.40738		6.38432	4.55912	7.85688	4.32174	4.12161		7.79172	8.15987	6.6479	9.91209	11.1817		9.10729	7.56644	9.9697	8.31448	6.90817
1.01649	1.02663	1.2471	1.074	1.01508		2.75993	1.17479	1.06101	1.04507	3.21534		3.23486	3.04497	2.27593	2.34556	2.36654		6.38701	4.43075	7.89916	4.21589	4.13056		7.93332	8.12215	6.63026	9.91935	11.0151		9.04252	7.55952	10.0556	8.53602	7.07171
1.01571	1.02873	1.24788	1.07507	1.01168		2.79914	1.17705	1.06062	1.04221	3.38648		3.25402	3.03906	2.27612	2.38688	2.40425		6.37964	4.54984	7.83873	4.47871	4.11563		7.983	8.11383	6.63263	9.90418	11.0212		9.05477	7.55779	10.0161	8.42742	6.82599
1.01136	1.02655	1.23277	1.08331	1.01677		2.76496	1.17078	1.04982	1.06138	3.40303		3.24039	3.03438	2.28388	2.31173	2.36162		6.36377	4.47415	7.96915	4.26726	4.07304		7.70504	8.14661	6.64843	9.9142	11.3078		9.05922	7.55278	9.88711	8.53894	6.94991
1.01196	1.02314	1.23926	1.12125	1.01767		2.79035	1.177	1.05489	1.04422	3.33698		3.25366	3.05216	2.30339	2.34273	2.39696		6.36765	4.51374	7.95683	4.51348	4.07925		8.01771	8.11108	6.62544	9.91924	11.4162		9.12365	7.54962	10.1592	8.49931	6.96715
1.01314	1.02373	1.23406	1.0807	1.01739		2.82135	1.18019	1.05239	1.05319	3.32601		3.26105	3.03087	2.31169	2.33657	2.38671		6.36135	4.51539	7.78025	4.48104	4.10866		7.86871	8.1416	6.62316	9.93335	10.957		9.00093	7.54602	10.0098	8.60874	6.95251
1.00548	1.0269	1.22765	1.04624	1.02098		2.84599	1.16122	1.04897	1.05232	3.25464		3.25204	3.05171	2.3099	2.33461	2.37982		6.36507	4.37952	7.78283	4.27275	4.14675		7.85688	8.15756	6.61836	9.90681	11.2508		9.1518	7.55456	9.98357	8.5067	6.95748
1.01338	1.02516	1.22926	1.10576	1.01306		2.78053	1.16394	1.0559	1.05397	3.24336		3.26763	3.03917	2.29087	2.36464	2.36852		6.35928	4.42453	7.844	4.18727	4.10015		7.89916	8.12201	6.62083	9.92974	11.0901		9.01824	7.54761	10.1521	8.40565	7.05231
1.02015	1.0248	1.22461	1.04035	1.01353		2.78765	1.16229	1.05012	1.04495	3.16805		3.27422	3.06134	2.29539	2.37408	2.40081		6.37162	4.39119	7.74537	4.39785	4.09499		7.83873	8.12351	6.6353	9.93898	11.2471		8.99267	7.52767	10.0202	8.63584	7.3439
1.01022	1.02559	1.22012	1.08186	1.00715		2.85661	1.15273	1.04884	1.06187	3.16104		3.26683	3.06955	2.2965	2.3216	2.39155		6.34731	4.41113	7.74957	4.55586	4.01949		7.96915	8.13842	6.61662	9.90583	11.088		9.03066	7.52719	9.81814	8.51652	7.00262
1.00764	1.02668	1.21656	1.0896	1.00951		2.85414	1.14187	1.04997	1.05574	3.21834		3.28049	3.06724	2.31519	2.36978	2.40448		6.35722	4.4157	7.72567	4.2826	4.04932		7.95683	8.11629	6.62363	9.89538	11.2456		9.04829	7.52083	9.83792	8.61459	6.90424
1.01533	1.02736	1.2163	1.09297	1.00731		2.8049	1.15957	1.05402	1.04473	3.19961		3.28373	3.07681	2.34345	2.37697	2.40041		6.35853	4.31062	7.82097	4.35617	4.16395		7.78025	8.13683	6.62344	9.93386	11.0902		9.03852	7.51455	10.0301	8.40431	6.88105
1.01537	1.02643	1.20956	1.06361	1.0086		2.80848	1.16114	1.04903	1.03872	3.21583		3.27962	3.06344	2.33754	2.34313	2.38363		6.38517	4.30413	7.75641	4.55681	4.19488		7.78283	8.14001	6.61949	9.87528	11.2484		9.02591	7.52303	10.0568	8.32979	7.26034
1.01812	1.02639	1.20419	1.0911	1.0115		2.81791	1.16857	1.05191	1.04592	3.16322		3.27646	3.06889	2.34972	2.33599	2.37838		6.3775	4.45736	7.99908	4.28894	4.08667		7.844	8.10241	6.61821	9.8966	10.9515		9.03355	7.52484	10.1016	8.37869	7.11416
1.01694	1.02593	1.20005	1.08241	1.01345		2.78903	1.1699	1.05213	1.05236	3.2248		3.28557	3.05661	2.35281	2.36361	2.40868		6.37104	4.42565	7.9097	4.34446	4.13239		7.74537	8.11328	6.61183	9.91666	11.2536		8.99336	7.50698	10.0368	8.32787	6.93631
1.01515	1.02806	1.20062	1.07247	1.01202		2.85405	1.17744	1.0565	1.05273	3.19787		3.27938	3.07184	2.37071	2.38869	2.42957		6.36257	4.34189	7.96272	4.43037	4.05544		7.74957	8.14479	6.6091	9.90329	11.0909		9.05557	7.5115	10.1822	8.33151	7.09044
1.0119	1.02557	1.19731	1.09343	1.00857		2.79962	1.16862	1.04125	1.05164	3.21225		3.27473	3.07431	2.36468	2.38062	2.39014		6.34849	4.41567	8.03026	4.57171	4.09773		7.72567	8.11529	6.60425	9.88398	11.1074		9.03553	7.50514	10.2896	8.57775	6.94983
1.01122	1.02668	1.19769	1.07006	1.02225		2.82148	1.16955	1.04079	1.03994	3.26893		3.27867	3.05787	2.38242	2.38394	2.41052		6.33137	4.33947	8.06113	4.58171	4.08948		7.82097	8.11087	6.60467	9.87223	11.2358		9.09398	7.50796	10.2879	8.31902	6.84823
1.01457	1.02758	1.18829	1.04554	1.01352		2.86671	1.16403	1.04916	1.03749	3.19362		3.28023	3.07487	2.37749	2.36359	2.37022		6.35083	4.27919	7.96464	4.50359	4.16127		7.75641	8.13894	6.6059	9.83351	11.0924		9.02986	7.48982	9.9976	8.36058	7.21609
1.01557	1.02326	1.17934	1.07951	1.01707		2.85257	1.16494	1.05764	1.05107	3.31423		3.28031	3.0701	2.376	2.34237	2.39059		6.36506	4.34538	7.8338	4.55204	4.1818		7.99908	8.11159	6.62139	9.80243	11.1008		9.07349	7.48983	10.0163	8.4695	6.89518
1.01069	1.02596	1.17823	1.07002	1.01118		2.79689	1.14525	1.04983	1.04008	3.39817		3.30084	3.08421	2.35084	2.36774	2.38917		6.34325	4.43456	7.81783	4.46745	4.23092		7.9097	8.10404	6.6183	9.86478	11.0761		9.07834	7.49745	10.1014	8.54606	6.83632
1.01153	1.02652	1.17954	1.07327	1.02409		2.74912	1.16339	1.0494	1.0486	3.39618		3.27683	3.05391	2.34057	2.3874	2.42642		6.34727	4.53447	7.89048	4.38202	4.18308		7.96272	8.11152	6.62748	9.8554	11.2563		9.11615	7.48977	9.9001	8.36253	6.81119
1.02261	1.02608	1.17098	1.07298	1.01781		2.74431	1.1533	1.04464	1.04873	3.38771		3.2712	3.11338	2.34085	2.37887	2.39032		6.35513	4.52042	7.90049	4.56293	4.22212		8.03026	8.10351	6.62081	9.83039	11.2488		9.09251	7.48405	9.9086	8.47793	6.93902
1.02042	1.02523	1.1696	1.08915	1.01999		2.71219	1.14973	1.05437	1.04206	3.40259		3.27109	3.10885	2.34952	2.37852	2.37622		6.36121	4.35957	7.8918	4.57339	4.10625		8.06113	8.10364	6.5937	9.89799	11.099		9.06501	7.48278	10.0284	8.41606	7.23251
1.01786	1.02748	1.16708	1.09969	1.01814		2.71407	1.15537	1.05599	1.04946	3.36642		3.27882	3.09976	2.33768	2.3706	2.35346		6.35859	4.33412	8.03049	4.56236	4.20947		7.96464	8.10278	6.6064	9.85664	10.9573		9.05253	7.47489	9.94743	8.61483	7.05282
1.01751	1.02746	1.15666	1.09921	1.02021		2.73179	1.18381	1.05849	1.04205	3.38088		3.27009	3.08267	2.31874	2.39126	2.36721		6.34372	4.35237	8.02948	4.52743	4.19302		7.8338	8.09991	6.60733	9.85975	11.0536		9.02158	7.48194	10.1485	8.31481	7.25089
1.01324	1.02669	1.15973	1.07056	1.02039		2.74811	1.17844	1.06847	1.04732	3.30073		3.27658	3.07053	2.31414	2.3863	2.35933		6.31637	4.34371	7.90301	4.56046	4.19768		7.81783	8.08386	6.61302	9.89045	11.0501		9.07503	7.45646	10.2407	8.3428	6.99572
1.01597	1.02761	1.14927	1.08298	1.01536		2.75009	1.16976	1.05427	1.04897	3.30966		3.28995	3.10152	2.28906	2.36809	2.41365		6.3306	4.42383	8.17423	4.34743	4.15717		7.89048	8.09769	6.62747	9.87363	11.05		9.05455	7.47933	10.0949	8.28526	6.80449
1.01251	1.02873	1.1486	1.08995	1.01622		2.72066	1.17087	1.0607	1.05086	3.24329		3.28281	3.11103	2.29843	2.40045	2.40954		6.34865	4.28105	7.93658	4.53187	4.13964		7.90049	8.02137	6.61985	9.84951	10.9072		9.07473	7.47501	10.0425	8.41724	6.78097
1.01856	1.02513	1.1439	1.07734	1.01384		2.77505	1.17108	1.05891	1.05104	3.20586		3.2905	3.11472	2.30558	2.40998	2.40807		6.33125	4.34953	7.87763	4.53969	4.18122		7.8918	8.09891	6.62088	9.86912	11.1841		8.99685	7.47223	9.91319	8.49091	6.83886
1.01354	1.02445	1.14453	1.10869	1.01602		2.75736	1.15079	1.0643	1.05732	3.23031		3.30008	3.09282	2.27579	2.41573	2.43466		6.33196	4.36519	7.94696	4.28803	4.1509		8.03049	8.11769	6.58561	9.86695	10.9008		9.00607	7.44867	10.1013	8.33935	6.92324
1.0099	1.02682	1.14182	1.07411	1.01469		2.77926	1.15773	1.05741	1.05349	3.21258		3.29177	3.09411	2.28298	2.39397	2.4145		6.3178	4.46983	7.94612	4.55297	4.16495		8.02948	8.08406	6.6158	9.84144	11.0412		9.01509	7.45183	10.1077	8.51731	7.11913
1.00714	1.02622	1.14487	1.07394	1.01216		2.76591	1.15858	1.05508	1.05232	3.22187		3.29542	3.09623	2.29447	2.37492	2.40541		6.30946	4.45932	7.90726	4.43462	4.18286		7.90301	8.07728	6.60846	9.86989	11.1734		8.95871	7.45646	9.96801	8.56039	6.92851
1.00299	1.02553	1.14187	1.10234	1.01816		2.76598	1.14909	1.05355	1.04269	3.23297		3.30849	3.09496	2.32397	2.40974	2.37473		6.34625	4.39466	7.90958	4.48822	4.18716		8.17423	8.10196	6.60364	9.86732	10.8748		9.05443	7.45441	10.1359	8.43092	6.83068
1.01029	1.02554	1.13535	1.06344	1.01339		2.77905	1.15719	1.0613	1.05444	3.20377		3.30699	3.10672	2.36048	2.42627	2.39089		6.33268	4.48757	7.95383	4.3333	4.23245		7.93658	8.08749	6.61284	9.83212	11.0453		8.96496	7.44133	9.98963	8.29064	6.98237
1.01911	1.0224	1.12671	1.09128	1.01674		2.77121	1.14322	1.05226	1.05584	3.1922		3.29772	3.10015	2.3726	2.4099	2.40336		6.34574	4.33903	7.8978	4.41428	4.15752		7.87763	8.08797	6.58727	9.86662	11.1726		8.99069	7.4562	10.062	8.27246	6.90137
1.0137	1.024	1.13513	1.12195	1.02337		2.72319	1.14361	1.05475	1.04876	3.26923		3.28871	3.09217	2.39799	2.40034	2.41304		6.3243	4.49125	7.80112	4.21026	4.20903		7.94696	8.10366	6.59147	9.85256	10.9913		9.0965	7.43808	10.2373	8.34366	6.9019
1.01442	1.02427	1.12104	1.06798	1.01012		2.78968	1.16241	1.05946	1.0391	3.16865		3.29284	3.12194	2.41952	2.42194	2.42268		6.33336	4.4786	7.98032	4.57289	4.22677		7.94612	8.07208	6.60523	9.83867	10.7182		9.02357	7.4549	10.0491	8.57178	6.86857
1.01645	1.02754	1.12243	1.08352	1.01527		2.78345	1.16581	1.06063	1.04505	3.21551		3.29956	3.1158	2.44102	2.42327	2.41592		6.31977	4.55862	8.0634	4.38813	4.19311		7.90726	8.08525	6.60995	9.8729	10.875		8.98593	7.44629	9.98943	8.55267	6.56372
1.0162	1.0268	1.12488	1.10674	1.01538		2.81477	1.15763	1.05645	1.05486	3.22495		3.28883	3.11291	2.4155	2.41279	2.43283		6.31055	4.49065	7.84009	4.21792	4.18494		7.90958	8.11148	6.6201	9.85047	10.981		9.07251	7.46079	9.99161	8.38082	6.79259
1.01271	1.02677	1.11916	1.04576	1.01025		2.75899	1.15583	1.05865	1.04361	3.26982		3.30625	3.13839	2.39413	2.46099	2.42674		6.28822	4.25662	7.9235	4.16978	4.14314		7.95383	8.06719	6.60696	9.84066	10.9477		8.99724	7.45384	10.0974	8.51181	6.53737
1.02206	1.02618	1.12123	1.07827	1.0171		2.75638	1.16802	1.05756	1.06304	3.2758		3.28952	3.114	2.39301	2.43032	2.40621		6.30208	4.45435	7.99514	4.45802	4.11024		7.8978	8.07381	6.60783	9.83132	10.8255		9.06159	7.45277	10.0051	8.42517	6.80368
1.00968	1.02245	1.11671	1.06463	1.01163		2.79896	1.16599	1.06346	1.0523	3.26061		3.29816	3.13289	2.35693	2.43105	2.3989		6.31984	4.32347	7.8958	4.36356	4.14892		7.80112	8.09696	6.61605	9.84569	10.9427		8.98268	7.45791	9.85331	8.33379	6.9936
1.01599	1.02501	1.11719	1.10992	1.00969		2.72561	1.16988	1.05602	1.03574	3.26517		3.29202	3.12815	2.34879	2.43592	2.41188		6.30135	4.26751	7.72445	4.55452	4.1489		7.98032	8.06827	6.61489	9.81497	11.0915		9.1039	7.46478	10.0877	8.43503	6.51825
1.00907	1.02386	1.11679	1.09107	1.00309		2.6649	1.14484	1.05159	1.05405	3.22173		3.29505	3.1484	2.35554	2.42362	2.39826		6.30693	4.35567	7.922	4.49395	4.13644		8.0634	8.08232	6.61291	9.83373	10.9598		8.95965	7.45882	9.97309	8.33178	6.85611
1.01202	1.02291	1.11866	1.09483	1.00959		2.7665	1.13921	1.06511	1.05506	3.25885		3.28449	3.14439	2.34298	2.43601	2.39775		6.30294	4.47595	7.91634	4.39623	4.13608		7.84009	8.11303	6.61406	9.84003	10.9274		9.01785	7.45071	9.9042	8.43166	6.69255
1.00818	1.02375	1.10584	1.11138	1		2.70652	1.13941	1.05615	1.05367	3.24804		3.27768	3.12913	2.35224	2.41668	2.42065		6.29903	4.39491	7.84726	4.25166	4.13856		7.9235	8.07315	6.6047	9.79414	10.9132		9.0057	7.43112	10.0876	8.39313	6.73093
1.02316	1.02345	1.11109	1.09539	1.0062		2.76408	1.15658	1.05339	1.06159	3.17867		3.29593	3.13035	2.38412	2.42054	2.43453		6.3165	4.31797	7.91812	4.35926	4.17586		7.99514	8.08011	6.60395	9.8268	10.9182		9.06296	7.45167	10.1917	8.36782	6.55192
1.01531	1.0225	1.11361	1.11314	1.00596		2.78715	1.16124	1.0584	1.05775	3.23718		3.29421	3.14279	2.37649	2.38807	2.43192		6.29492	4.44938	8.03988	4.4585	4.14106		7.8958	8.11258	6.60488	9.79658	11.0487		9.03902	7.44632	9.79665	8.30827	6.7316
