# Supplementary material for: UBR-1 deficiency leads to ivermectin resistance in Caenorhabditis elegans
Source: eLife journal article supplement (doi:10.7554/elife.103718), 2024-12-13
Supplement: data1 [file Figure 5-source data 3(C).xlsx]

## Sheet: Sheet1
0 mM	1.05218	1.17843	1.39624	1.45497	1.17892
5 mM	2.93446	1.43707	1.1109	1.073	3.58266
10 mM	3.63571	3.3423	2.81066	2.74879	2.53719
20 mM	6.68717	4.70947	8.8824	5.08854	4.65983
40 mM	8.8824	9.80594	9.39383	11.5428	14.3379
80 mM	9.22857	9.55114	10.7366	8.74617	14.5222
