# Supplementary material for: UBR-1 deficiency leads to ivermectin resistance in Caenorhabditis elegans
Source: eLife journal article supplement (doi:10.7554/elife.103718), 2024-12-13
Supplement: data1 [file Figure 5-source data 4(D-E).xlsx]

## Sheet: Sheet1
WT 5-HT											WT 5-HT+IVM											ubr-1 5-HT											ubr-1 5-HT+IVM
1.08358	1.12831	1.04208	1.04536	1.04967	1.25734	1.11516	1.18973	1.06706	1.1098		1.06079	1.05091	1.0317	1.17674	1.22205	1.10074	1.09322	1.0436	1.11843	1.02154		1.10591	1.34075	1.11509	1.03829	1.02678	1.14453	1.10494	1.08143	1.04136	1.0209		1.0472	1.21743	1.3232	1.03324	1.11505	1.19643	1.17277	1.04806	1.10937	1.17004
1.11932	1.13148	1.04337	1.04723	1.09661	1.23876	1.12823	1.18025	1.0724	1.1358		1.0665	1.05185	1.03151	1.18191	1.20966	1.09805	1.12858	1.04387	1.11523	1.01868		1.14324	1.4041	1.11923	1.03658	1.02877	1.15982	1.1591	1.05974	1.02763	1.02544		1.04694	1.23983	1.31109	1.03466	1.1206	1.18855	1.18139	1.07331	1.1137	1.19239
1.07828	1.13248	1.08876	1.0506	1.116	1.23289	1.13071	1.18009	1.06898	1.10874		1.06111	1.0468	1.02881	1.18049	1.21771	1.10323	1.12786	1.04396	1.11641	1.02054		1.12684	1.35478	1.1083	1.03571	1.02429	1.16039	1.07812	1.08874	1.02375	1.02667		1.05623	1.13004	1.27113	1.04366	1.1253	1.18765	1.16781	1.06442	1.09815	1.15355
1.1042	1.13451	1.09672	1.05147	1.13051	1.22284	1.11218	1.18212	1.07321	1.11763		1.05677	1.04258	1.03149	1.18115	1.20789	1.10329	1.13943	1.04249	1.11822	1.02077		1.12518	1.39614	1.06949	1.04173	1.03906	1.17324	1.19757	1.08476	1.03767	1.02045		1.05027	1.18932	1.2993	1.03954	1.11323	1.18232	1.17312	1.04647	1.12925	1.12445
1.09887	1.13208	1.10119	1.0505	1.13153	1.21804	1.12046	1.18412	1.07108	1.08808		1.05723	1.0436	1.03343	1.18194	1.21764	1.10259	1.14752	1.04461	1.11853	1.02154		1.16303	1.39777	1.02281	1.03769	1.10043	1.1383	1.13101	1.06598	1.04194	1.01455		1.0428	1.18447	1.24267	1.0345	1.12185	1.17986	1.18757	1.07175	1.1376	1.19105
1.07283	1.14067	1.0814	1.04943	1.12382	1.21511	1.11674	1.18459	1.07653	1.11427		1.06118	1.04113	1.03289	1.17512	1.19444	1.10484	1.14178	1.04246	1.11596	1.02157		1.20936	1.453	1.10456	1.04166	1.13105	1.17051	1.20248	1.06653	1.02478	1.00831		1.0353	1.1856	1.29515	1.03483	1.11354	1.1704	1.18538	1.09892	1.11034	1.1354
1.07093	1.14594	1.07875	1.05116	1.1155	1.1965	1.12897	1.1846	1.07187	1.10766		1.06256	1.04175	1.03304	1.17971	1.21347	1.0991	1.09716	1.04421	1.11788	1.01948		1.16943	1.40888	1.09544	1.03592	1.13522	1.15083	1.17219	1.06802	1.02803	1.02486		1.05511	1.16231	1.27576	1.02293	1.125	1.17088	1.18912	1.07821	1.11389	1.16237
1.05525	1.14325	1.04322	1.04986	1.11566	1.2219	1.12845	1.18486	1.08004	1.16965		1.06183	1.05242	1.03188	1.18143	1.22501	1.1021	1.12307	1.04401	1.11571	1.02013		1.1917	1.38508	1.10715	1.03631	1.12009	1.13862	1.12638	1.07033	1.03404	1.00711		1.0481	1.17282	1.26322	1.02154	1.12437	1.16688	1.19218	1.07147	1.13741	1.156
1.08213	1.1436	1.04911	1.05572	1.09907	1.17887	1.14063	1.18375	1.06748	1.11577		1.06402	1.05234	1.03443	1.17841	1.21544	1.099	1.11713	1.0446	1.11487	1.01962		1.15869	1.37956	1.09948	1.03881	1.09692	1.13582	1.10198	1.06373	1.04687	1.02581		1.04344	1.06308	1.29808	1.01692	1.12442	1.1824	1.19215	1.06598	1.13228	1.12328
1.06875	1.14209	1.06952	1.04928	1.0829	1.19115	1.12463	1.18289	1.07025	1.09252		1.0625	1.04748	1.03324	1.17764	1.22074	1.10194	1.14257	1.04423	1.11464	1.02113		1.21125	1.38696	1.06406	1.0354	1.09249	1.15659	1.0511	1.07246	1.02867	1.03984		1.04371	1.13904	1.32738	1.02325	1.11725	1.18024	1.17953	1.11821	1.15938	1.12463
1.07463	1.14435	1.05962	1.0498	1.0891	1.17178	1.13704	1.18707	1.07491	1.15603		1.06531	1.0466	1.03008	1.18087	1.20814	1.09746	1.14641	1.04317	1.1139	1.02065		1.16632	1.35701	1.0549	1.04113	1.08823	1.15431	1.12354	1.06133	1.04557	1.04349		1.03507	1.09408	1.3193	1.01373	1.10996	1.18115	1.18284	1.12558	1.12076	1.22837
1.08563	1.14426	1.06433	1.05314	1.07191	1.19482	1.11308	1.18515	1.06623	1.12658		1.05659	1.04454	1.03045	1.17599	1.19826	1.10156	1.1341	1.04516	1.11449	1.02161		1.20911	1.41624	1.11348	1.03748	1.06829	1.15538	1.13997	1.08556	1.02855	1.04223		1.02696	1.22598	1.2896	1.0139	1.11662	1.18361	1.21636	1.15248	1.14017	1.16317
1.04949	1.13893	1.01646	1.05373	1.06484	1.22266	1.11182	1.18357	1.07222	1.07708		1.06393	1.04396	1.02808	1.17072	1.20215	1.09785	1.17034	1.04351	1.11603	1.01954		1.20313	1.39756	1.11448	1.03378	1.05616	1.15652	1.07085	1.06752	1.0399	1.05549		1.03855	1.13138	1.29028	1.01362	1.11999	1.21039	1.27205	1.12517	1.15882	1.15905
1.12493	1.13504	1.04793	1.04882	1.06915	1.21658	1.12569	1.18088	1.07228	1.10532		1.05511	1.04255	1.03244	1.17503	1.22184	1.09738	1.1259	1.04328	1.11585	1.01899		1.27184	1.3889	1.10473	1.03566	1.05441	1.13357	1.07689	1.07049	1.02708	1.06187		1.04059	1.13146	1.29603	1.01031	1.11009	1.22167	1.27721	1.14457	1.14514	1.25407
1.09194	1.13619	1.09379	1.05217	1.06425	1.22152	1.13794	1.18081	1.0722	1.12897		1.06574	1.04205	1.02944	1.17933	1.23961	1.0947	1.15741	1.0449	1.11259	1.0212		1.15609	1.41608	1.14329	1.03318	1.04061	1.12235	1.14884	1.06984	1.04461	1.04518		1.04055	1.13407	1.31152	1.01684	1.10309	1.22015	1.2803	1.11599	1.14369	1.20985
1.07238	1.1306	1.11169	1.04825	1.05517	1.21137	1.1112	1.17591	1.07309	1.0989		1.0676	1.04302	1.03451	1.17383	1.24416	1.0965	1.1234	1.04325	1.11299	1.02079		1.17761	1.37806	1.12091	1.0383	1.04223	1.12993	1.06879	1.04586	1.03255	1.04548		1.07132	1.11645	1.31501	1.02197	1.11492	1.22125	1.2639	1.11086	1.11311	1.17966
1.11063	1.12487	1.08946	1.05138	1.0491	1.19835	1.1242	1.17413	1.07641	1.12636		1.07124	1.03951	1.03343	1.17236	1.2091	1.09552	1.12644	1.04235	1.11339	1.01942		1.21553	1.38991	1.12912	1.0361	1.03784	1.15553	1	1.06739	1.04753	1.06465		1.0384	1.13402	1.25635	1.0306	1.09784	1.22671	1.25822	1.12345	1.16514	1.16627
1.06167	1.12555	1.07771	1.05395	1.04536	1.20429	1.11102	1.17977	1.07967	1.14522		1.06107	1.04767	1.03233	1.1733	1.21188	1.09294	1.14197	1.04263	1.11251	1.01971		1.28029	1.3938	1.11277	1.04165	1.03302	1.12939	1.09485	1.0476	1.03352	1.06137		1.03695	1.15337	1.28532	1.03919	1.10397	1.23056	1.25474	1.11024	1.1122	1.16779
1.1142	1.12481	1.05647	1.04999	1.04112	1.22424	1.1273	1.18196	1.07819	1.12786		1.07248	1.0476	1.02801	1.16583	1.19444	1.09442	1.13043	1.04205	1.11335	1.01948		1.17267	1.38779	1.11715	1.06155	1.03926	1.11824	1.06654	1.05544	1.04374	1.05508		1.05811	1.10419	1.27281	1.03801	1.11104	1.21186	1.25986	1.10766	1.14326	1.1642
1.08754	1.12611	1.05918	1.05219	1.05099	1.16583	1.11192	1.18055	1.07841	1.13359		1.0754	1.05541	1.02909	1.17528	1.18531	1.09232	1.14629	1.04228	1.11446	1.0189		1.18568	1.39868	1.10977	1.06018	1.08308	1.17951	1.10754	1.05172	1.03112	1.03529		1.06628	1.15586	1.27409	1.02688	1.1097	1.21463	1.25534	1.10421	1.14632	1.2025
1.0923	1.12978	1.05092	1.04999	1.04482	1.16306	1.13132	1.17463	1.07596	1.14522		1.07097	1.05556	1.0397	1.177	1.2413	1.09592	1.15908	1.04382	1.11392	1.01946		1.13737	1.36891	1.11667	1.05961	1.09096	1.13978	1.06928	1.0494	1.03991	1.0502		1.02796	1.11912	1.33521	1.0192	1.11614	1.21417	1.2474	1.12842	1.09989	1.19868
1.10743	1.12987	1.07044	1.05559	1.042	1.17428	1.11648	1.17387	1.07701	1.15483		1.07349	1.04931	1.03269	1.17303	1.19966	1.0924	1.17692	1.04404	1.11658	1.02129		1.17778	1.32692	1.09532	1.05387	1.07092	1.1098	1.1049	1.05821	1.02261	1.10015		1.05417	1.15026	1.28184	1.01924	1.10943	1.20575	1.24762	1.11483	1.16999	1.09249
1.09214	1.12443	1.08624	1.0515	1.03974	1.16968	1.1101	1.17836	1.07601	1.1237		1.06559	1.05228	1.03345	1.17295	1.19814	1.09221	1.15029	1.04376	1.11661	1.02055		1.13227	1.39706	1.1062	1.04792	1.06223	1.15834	1.10495	1.05339	1.03347	1.22117		1.04823	1.16046	1.25832	1.02043	1.10756	1.2128	1.25269	1.13307	1.15804	1.18087
1.11443	1.12577	1.05465	1.0534	1.04245	1.21109	1.10949	1.17431	1.07199	1.13054		1.07358	1.05082	1.03553	1.17702	1.24583	1.09531	1.14613	1.04391	1.11584	1.01983		1.14742	1.36498	1.03318	1.04429	1.06339	1.1375	1.12395	1.09238	1.033	1.23592		1.03802	1.1111	1.30007	1.01607	1.11868	1.21217	1.22651	1.12372	1.16867	1.15793
1.10818	1.11843	1.0565	1.06099	1.03738	1.22741	1.11506	1.17296	1.07597	1.0885		1.07294	1.04849	1.03393	1.18009	1.18142	1.09161	1.18922	1.04624	1.11777	1.01709		1.21227	1.34443	1.10186	1.04095	1.05168	1.14152	1.19003	1.05351	1.04119	1.23411		1.06236	1.12884	1.28212	1.01871	1.10208	1.20922	1.23091	1.10096	1.17198	1.12754
1.14642	1.12113	1.04853	1.05414	1.04076	1.25485	1.10466	1.16874	1.07277	1.14029		1.07224	1.04899	1.04026	1.17869	1.20137	1.09694	1.14289	1.04581	1.11572	1.01768		1.17094	1.34418	1.09825	1.03597	1.04672	1.14941	1.14948	1.0479	1.03611	1.24665		1.04796	1.16471	1.29785	1.02016	1.10454	1.21093	1.24559	1.08376	1.21494	1.16893
1.13736	1.12559	1.04951	1.05889	1.03576	1.25189	1.10559	1.16685	1.07046	1.13922		1.06657	1.05134	1.03366	1.17769	1.21069	1.09724	1.18436	1.04715	1.11704	1.02006		1.1968	1.3256	1.09878	1.03328	1.03976	1.11565	1.13905	1.07173	1.04177	1.24351		1.04993	1.16794	1.35501	1.01926	1.12412	1.19755	1.2382	1.11128	1.19988	1.13273
1.0888	1.11992	1.04455	1.05712	1.04423	1.25183	1.10608	1.17195	1.0686	1.07156		1.07215	1.04825	1.03356	1.18745	1.23606	1.09613	1.18913	1.04798	1.11602	1.01964		1.10086	1.35893	1.11563	1.03326	1.0341	1.14039	1.21797	1.05873	1.04132	1.19949		1.04831	1.14663	1.32717	1.02003	1.11931	1.20255	1.24926	1.09604	1.16542	1.1697
1.08379	1.11754	1.06993	1.04957	1.04445	1.27003	1.11441	1.17552	1.06798	1.12214		1.06909	1.04734	1.03616	1.18635	1.2161	1.09806	1.16232	1.04861	1.11443	1.01776		1.11893	1.31324	1.09901	1.03564	1.03115	1.15168	1.10106	1.06783	1.0292	1.14355		1.03821	1.13893	1.31935	1.01762	1.12158	1.19446	1.2439	1.08892	1.21095	1.16484
1.09935	1.12053	1.05627	1.05819	1.04237	1.26163	1.12115	1.17376	1.07725	1.1246		1.06907	1.04954	1.03578	1.18415	1.19552	1.09636	1.19058	1.04784	1.11444	1.01814		1.22086	1.31015	1.11493	1.03436	1.02955	1.1078	1.12251	1.06946	1.02515	1.11934		1.04373	1.16985	1.29733	1.02234	1.12669	1.20366	1.24036	1.09405	1.23457	1.20048
1.1651	1.12097	1.03925	1.05579	1.04024	1.22163	1.12455	1.18001	1.06953	1.1031		1.07768	1.04875	1.03927	1.18449	1.17156	1.09841	1.14114	1.05077	1.11472	1.01691		1.23666	1.34596	1.1026	1.03092	1.04581	1.13346	1.14022	1.05637	1.02046	1.0838		1.03936	1.14539	1.2976	1.03833	1.12042	1.19576	1.22829	1.0772	1.16379	1.13831
1.22335	1.12263	1.03569	1.05574	1.0495	1.20115	1.11711	1.18648	1.07538	1.11495		1.07012	1.04599	1.03226	1.18181	1.21653	1.09437	1.15358	1.05119	1.1135	1.01703		1.14927	1.30192	1.09957	1.03523	1.18296	1.11628	1.1782	1.04377	1.03433	1.07047		1.05883	1.1329	1.30354	1.03564	1.12604	1.19866	1.22825	1.07675	1.14719	1.18285
1.22713	1.11857	1.04664	1.05763	1.05127	1.2026	1.10004	1.1897	1.07642	1.15023		1.07295	1.05126	1.03284	1.18637	1.22724	1.09498	1.14669	1.05159	1.11422	1.01966		1.20834	1.28849	1.10663	1.03182	1.25017	1.13611	1.10314	1.0687	1.03401	1.04092		1.04056	1.15026	1.31645	1.03354	1.13927	1.18763	1.24308	1.08643	1.21031	1.19771
1.26888	1.1179	1.04459	1.05215	1.05596	1.2204	1.11109	1.18919	1.07342	1.12851		1.07094	1.05235	1.02937	1.19162	1.24126	1.09089	1.16987	1.05288	1.11318	1.01858		1.23358	1.31759	1.17671	1.03272	1.23588	1.15099	1.15038	1.08795	1.04364	1.04437		1.05245	1.07697	1.32664	1.04467	1.13276	1.1934	1.22472	1.09266	1.27986	1.1698
1.3077	1.11963	1.04549	1.05375	1.05265	1.18237	1.10005	1.18505	1.07043	1.09384		1.07001	1.04375	1.03538	1.19817	1.21993	1.09203	1.17059	1.05306	1.1126	1.01902		1.16416	1.26296	1.11572	1.02972	1.21302	1.15524	1.17235	1.05594	1.03932	1.04448		1.04073	1.12745	1.285	1.03395	1.12051	1.19003	1.23755	1.10815	1.27927	1.12949
1.23477	1.12083	1.05647	1.05335	1.10596	1.16797	1.11089	1.1874	1.07279	1.11973		1.07512	1.04192	1.03361	1.19355	1.21917	1.08998	1.16095	1.05372	1.10992	1.01875		1.19523	1.28635	1.07196	1.03551	1.19496	1.15143	1.15629	1.07749	1.03656	1.03323		1.03297	1.15642	1.34421	1.03496	1.13098	1.19849	1.22958	1.08662	1.26261	1.21383
1.22592	1.12351	1.04348	1.05299	1.14307	1.19033	1.11278	1.18121	1.07117	1.13405		1.06864	1.04629	1.03744	1.19347	1.2284	1.09177	1.15662	1.05427	1.11179	1.01852		1.25849	1.26197	1.11895	1.02912	1.16195	1.14301	1.20131	1.07571	1.03481	1.02485		1.05379	1.1181	1.33207	1.02454	1.12048	1.19727	1.21489	1.09199	1.24023	1.09913
1.25034	1.12216	1.04347	1.05409	1.15663	1.17479	1.10138	1.1816	1.07469	1.14515		1.07089	1.04789	1.03678	1.19213	1.24455	1.09545	1.1299	1.05361	1.11269	1.0162		1.18467	1.27665	1.11483	1.02771	1.13609	1.13243	1.11523	1.07623	1.04737	1.02643		1.03974	1.13993	1.34853	1.0285	1.13881	1.20052	1.21606	1.0959	1.18324	1.15339
1.20511	1.12284	1.05274	1.05521	1.15972	1.17423	1.09997	1.17836	1.07574	1.13364		1.07987	1.0476	1.02773	1.19681	1.24141	1.09621	1.17477	1.0538	1.11252	1.01776		1.19366	1.27229	1.10274	1.02527	1.10978	1.1565	1.10758	1.07964	1.04169	1.02491		1.03133	1.21187	1.33204	1.02482	1.14668	1.18897	1.22547	1.11836	1.18637	1.15698
1.19948	1.11775	1.07945	1.05322	1.1565	1.18155	1.09658	1.17952	1.07467	1.14969		1.07504	1.04688	1.0371	1.19494	1.21549	1.09539	1.18725	1.05348	1.11258	1.02055		1.22274	1.25822	1.11119	1.02745	1.09699	1.16869	1.07586	1.03914	1.02575	1.02127		1.05065	1.12336	1.32808	1.02754	1.14239	1.19318	1.21913	1.12527	1.26337	1.12071
1.2255	1.11894	1.10327	1.05261	1.15491	1.20732	1.0981	1.18634	1.07488	1.11935		1.06334	1.04794	1.03639	1.19682	1.21007	1.09684	1.15207	1.05156	1.11132	1.01856		1.06454	1.26172	1.10802	1.02792	1.09038	1.14541	1.10079	1.04493	1.02907	1.01785		1.0439	1.09695	1.32826	1.02644	1.12382	1.19921	1.2377	1.09708	1.2486	1.15446
1.32203	1.12535	1.075	1.05569	1.14142	1.20684	1.10685	1.18028	1.07289	1.16345		1.07487	1.05202	1.03879	1.19588	1.20367	1.09427	1.15323	1.05133	1.10939	1.01789		1.14334	1.26217	1.07607	1.03023	1.06438	1.13475	1.06779	1.05931	1.03807	1.02468		1.02562	1.14482	1.32336	1.02755	1.12657	1.19267	1.25042	1.12306	1.21996	1.09678
1.30067	1.12778	1.08495	1.05733	1.1352	1.23588	1.10318	1.18504	1.0702	1.13078		1.08238	1.05112	1.03396	1.1879	1.21615	1.09615	1.16513	1.05217	1.11146	1.01756		1.1553	1.19782	1.06807	1.03096	1.05415	1.15648	1.11716	1.04087	1.03652	1.01534		1.05983	1.11242	1.34398	1.02586	1.12664	1.17956	1.24115	1.11514	1.25453	1.16584
1.424	1.12347	1.07424	1.05891	1.12449	1.20144	1.1213	1.18287	1.06932	1.07993		1.08089	1.05441	1.02966	1.19945	1.24644	1.09666	1.16285	1.05155	1.112	1.01896		1.21455	1.192	1.0965	1.02827	1.04617	1.16867	1.11678	1.06834	1.03165	1.01489		1.04743	1.14334	1.37358	1.03054	1.12925	1.19693	1.24385	1.10621	1.20734	1.1419
1.4359	1.12161	1.05552	1.05721	1.10198	1.21408	1.11636	1.18252	1.06987	1.18015		1.07162	1.05362	1.03445	1.19821	1.18178	1.09524	1.11916	1.05173	1.1132	1.0178		1.19621	1.22872	1.08799	1.02208	1.03046	1.16755	1.17557	1.0442	1.04392	1.01922		1.03432	1.12739	1.35559	1.02081	1.12447	1.19435	1.24808	1.10955	1.21081	1.15277
1.44892	1.12101	1.056	1.0633	1.09803	1.22663	1.11651	1.17652	1.06976	1.16818		1.0711	1.04895	1.03011	1.1956	1.20418	1.09585	1.14247	1.05151	1.11112	1.01635		1.13532	1.25036	1.09119	1.02384	1.03072	1.15757	1.16192	1.07939	1.04767	1.00839		1.05151	1.13376	1.36878	1.02401	1.1519	1.1865	1.24921	1.08912	1.27901	1.15922
1.53206	1.12209	1.04212	1.05564	1.07987	1.20014	1.10843	1.1806	1.07346	1.08136		1.07577	1.04582	1.03668	1.19429	1.21175	1.09612	1.19014	1.05074	1.11217	1.01634		1.18949	1.22996	1.09739	1.02955	1.02368	1.16748	1.19171	1.06293	1.04401	1.03059		1.04475	1.12328	1.36762	1.02968	1.13715	1.17684	1.26125	1.10498	1.26144	1.16538
1.49082	1.11705	1.04571	1.05737	1.08503	1.25825	1.09471	1.18034	1.07229	1.0816		1.08115	1.05122	1.03419	1.19184	1.243	1.0962	1.16725	1.05148	1.11282	1.01766		1.16393	1.24364	1.104	1.02984	1.02519	1.1631	1.10391	1.1076	1.04743	1.0274		1.03676	1.16105	1.38185	1.02521	1.1571	1.17329	1.23046	1.10583	1.30116	1.18453
1.41154	1.11463	1.0671	1.06054	1.07464	1.25933	1.1029	1.17756	1.06999	1.14298		1.0758	1.05154	1.03304	1.18673	1.21157	1.09367	1.17748	1.05052	1.11085	1.01849		1.1806	1.26104	1.10976	1.02617	1.02454	1.14875	1.11409	1.0976	1.03614	1.02688		1.03216	1.11236	1.36497	1.02758	1.14269	1.17382	1.22596	1.08908	1.36872	1.1318
1.54376	1.11088	1.04957	1.05919	1.07877	1.2668	1.10182	1.18228	1.07187	1.12948		1.07537	1.04717	1.03467	1.19481	1.24198	1.09577	1.15216	1.05177	1.11087	1.01907		1.14381	1.20367	1.11428	1.02834	1.02027	1.14487	1.00892	1.06819	1.04633	1.02962		1.04857	1.07041	1.353	1.01983	1.1537	1.16369	1.22375	1.10443	1.48175	1.18698
1.38667	1.10526	1.06894	1.05521	1.08329	1.24418	1.11186	1.18566	1.07336	1.1175		1.07473	1.04743	1.03479	1.19138	1.20251	1.0937	1.15887	1.05094	1.11259	1.01854		1.09334	1.25826	1.10587	1.02466	1.02243	1.14768	1.10995	1.07344	1.02407	1.02879		1.03493	1.13156	1.35433	1.03176	1.14864	1.16475	1.23154	1.10091	1.42359	1.14422
1.37454	1.1026	1.06973	1.05512	1.07805	1.22329	1.10447	1.18448	1.07367	1.08551		1.08561	1.04966	1.03677	1.18591	1.22954	1.09307	1.17194	1.05108	1.11048	1.0174		1.16567	1.25665	1.10356	1.02979	1.02321	1.15844	1.18716	1.0583	1.04332	1.03413		1.03617	1.10365	1.34587	1.06011	1.13861	1.17091	1.22154	1.07953	1.35399	1.16747
1.39993	1.10452	1.03652	1.05973	1.06835	1.22591	1.10698	1.18302	1.07156	1.10468		1.08928	1.0478	1.03376	1.1803	1.22802	1.09589	1.14868	1.05194	1.11001	1.01696		1.12194	1.25959	1.08204	1.02556	1.02816	1.14709	1.16145	1.06353	1.03619	1.03343		1.04123	1.10606	1.35743	1.0689	1.14195	1.1811	1.24067	1.07697	1.36677	1.14895
1.35583	1.10444	1.05199	1.05869	1.07505	1.19866	1.11954	1.18227	1.07081	1.13281		1.08721	1.04719	1.02897	1.1839	1.21897	1.09246	1.16257	1.05	1.10847	1.01703		1.13733	1.29621	1.09824	1.02888	1.01789	1.1425	1.13002	1.11972	1.02506	1.02462		1.04295	1.13065	1.31785	1.06426	1.15075	1.1744	1.22618	1.09499	1.22644	1.12288
1.33546	1.10566	1.08533	1.06185	1.06509	1.20579	1.11536	1.18346	1.0717	1.08769		1.08821	1.04198	1.0357	1.1775	1.21929	1.08996	1.13194	1.05093	1.10996	1.01825		1.14251	1.28828	1.10019	1.02865	1.02008	1.12568	1.10764	1.05445	1.04156	1.01523		1.04358	1.12817	1.31679	1.05141	1.16597	1.17223	1.22887	1.11701	1.27195	1.136
1.29523	1.10418	1.06488	1.06171	1.06834	1.2192	1.12333	1.18276	1.06501	1.14913		1.08556	1.0451	1.03336	1.17543	1.22809	1.09278	1.15148	1.05056	1.11101	1.01757		1.22594	1.34113	1.09918	1.02689	1.01907	1.1475	1.10964	1.08634	1.04326	1.02819		1.03144	1.24255	1.31321	1.04869	1.17065	1.16911	1.23252	1.09454	1.28163	1.11579
1.27873	1.1055	1.06673	1.05735	1.06232	1.23423	1.10182	1.17848	1.06917	1.1339		1.08001	1.04237	1.04107	1.18103	1.23019	1.09061	1.20701	1.04952	1.11234	1.01895		1.13312	1.35081	1.09513	1.02596	1.01741	1.17466	1.07562	1.08791	1.02321	1.03442		1.04042	1.13031	1.33416	1.04161	1.15623	1.16325	1.22872	1.08337	1.25175	1.17722
1.22668	1.11025	1.04483	1.05798	1.0526	1.26361	1.10937	1.183	1.07497	1.15806		1.08753	1.04739	1.03491	1.17946	1.22005	1.09432	1.19893	1.04822	1.11401	1.01795		1.16765	1.32544	1.09446	1.02416	1.01693	1.13216	1.04062	1.11982	1.03582	1.02513		1.0316	1.1195	1.35001	1.04096	1.16894	1.1602	1.23637	1.0774	1.24179	1.12578
1.24502	1.10817	1.0492	1.05915	1.03835	1.27137	1.11113	1.18765	1.07286	1.17179		1.08969	1.05152	1.03839	1.17491	1.21745	1.08968	1.15515	1.04872	1.11398	1.01618		1.20204	1.31456	1.09908	1.02591	1.01065	1.11974	1.16515	1.07151	1.02321	1.02062		1.04574	1.08128	1.33683	1.03588	1.15156	1.14745	1.22216	1.10101	1.19378	1.16604
1.27914	1.10717	1.07049	1.06437	1.0557	1.26002	1.11432	1.1859	1.07246	1.18082		1.09158	1.04656	1.03276	1.17631	1.18396	1.09375	1.15879	1.04763	1.11062	1.01703		1.18759	1.30837	1.09194	1.02492	1.02067	1.15568	1.04045	1.09196	1.02279	1.0178		1.03978	1.12551	1.34152	1.03361	1.16656	1.16277	1.22265	1.07943	1.21356	1.14018
1.34283	1.10231	1.07338	1.06191	1.04988	1.26932	1.10662	1.18693	1.06725	1.12999		1.09226	1.04647	1.03837	1.17661	1.24678	1.09046	1.20756	1.04505	1.11302	1.01689		1.18959	1.40332	1.11055	1.03	1.02077	1.16755	1.10208	1.0778	1.03216	1.02664		1.04311	1.12089	1.34326	1.05558	1.14913	1.15687	1.22259	1.09704	1.16475	1.21464
1.42332	1.10071	1.09258	1.05964	1.04365	1.26469	1.11008	1.18399	1.06482	1.13203		1.09056	1.04503	1.03287	1.1745	1.22302	1.08931	1.18238	1.04378	1.1122	1.01643		1.19257	1.36374	1.09452	1.02643	1.02375	1.15435	1.0637	1.1533	1.02591	1.04007		1.03573	1.07151	1.35096	1.05445	1.15304	1.15447	1.22516	1.09816	1.15028	1.16289
1.38442	1.10287	1.11181	1.05686	1.04368	1.27537	1.10919	1.17774	1.06954	1.11896		1.09284	1.04043	1.03842	1.17347	1.23055	1.08958	1.18806	1.04228	1.1114	1.01719		1.15907	1.40223	1.09038	1.02987	1.0143	1.10447	1.0737	1.10258	1.03555	1.0602		1.03316	1.11918	1.35381	1.04976	1.1626	1.16595	1.22563	1.096	1.09921	1.22938
1.49199	1.09905	1.08848	1.06026	1.03705	1.25919	1.10386	1.18618	1.07406	1.14155		1.09038	1.0391	1.03347	1.17267	1.2435	1.09078	1.17961	1.04422	1.11143	1.01577		1.11473	1.40874	1.08911	1.02809	1.02935	1.15409	1.15432	1.09974	1.04084	1.04144		1.04715	1.14695	1.34478	1.05044	1.15667	1.1533	1.24159	1.09478	1.14089	1.18422
1.45081	1.10315	1.09405	1.05852	1.03859	1.21022	1.10777	1.18263	1.07155	1.13752		1.09795	1.04391	1.03412	1.17405	1.20774	1.08947	1.18181	1.04215	1.1103	1.01634		1.1392	1.36272	1.10265	1.02576	1.06456	1.17546	1.15897	1.10705	1.03467	1.05928		1.02014	1.15542	1.33437	1.04719	1.16274	1.17072	1.22642	1.08515	1.07223	1.21144
1.45914	1.10038	1.06419	1.05955	1.03388	1.2145	1.10715	1.18397	1.07268	1.16501		1.09159	1.04312	1.0326	1.16989	1.19151	1.08917	1.15423	1.04438	1.10971	1.01579		1.1115	1.35782	1.09647	1.02961	1.12116	1.14653	1.22303	1.10443	1.03835	1.04818		1.03158	1.15122	1.34277	1.05164	1.14266	1.18782	1.20794	1.08784	1.06797	1.20847
1.4288	1.10082	1.05069	1.056	1.03991	1.17771	1.11143	1.17917	1.07845	1.08917		1.09381	1.04324	1.03083	1.17291	1.23019	1.08666	1.15498	1.04235	1.1118	1.01483		1.07359	1.35697	1.07065	1.02653	1.15112	1.15094	1.17908	1.10074	1.05183	1.04516		1.03951	1.12222	1.33812	1.0411	1.1551	1.18517	1.23508	1.11481	1.04019	1.15328
1.42924	1.09917	1.05311	1.05714	1.03441	1.188	1.11281	1.17977	1.08049	1.09735		1.09748	1.03961	1.03391	1.17066	1.21961	1.08672	1.19405	1.0439	1.10939	1.01594		1.16547	1.39544	1.0578	1.02859	1.13988	1.12633	1.13837	1.07994	1.04021	1.04408		1.03267	1.1147	1.3417	1.04099	1.14915	1.17841	1.22968	1.09072	1.09597	1.11358
1.4402	1.10032	1.06566	1.05913	1.03758	1.18852	1.10701	1.18204	1.07415	1.0856		1.09574	1.04132	1.03398	1.16774	1.22285	1.0874	1.16425	1.04225	1.11191	1.01345		1.18591	1.38342	1.10782	1.02257	1.11929	1.1172	1.15111	1.12363	1.04411	1.11722		1.04198	1.07926	1.31275	1.04302	1.1469	1.17675	1.20935	1.09735	1.08363	1.16982
1.45202	1.10171	1.04906	1.06194	1.03395	1.21706	1.11425	1.17555	1.07279	1.10021		1.0947	1.04597	1.03439	1.17095	1.19114	1.0914	1.15262	1.04469	1.11145	1.01597		1.16463	1.38134	1.09608	1.02477	1.10594	1.15707	1.2068	1.09855	1.04952	1.25528		1.0434	1.11481	1.38325	1.03964	1.1609	1.16743	1.22501	1.09713	1.03727	1.14939
1.40208	1.0982	1.06609	1.05891	1.04378	1.19385	1.11553	1.16983	1.08189	1.11838		1.0958	1.04284	1.03211	1.1687	1.24423	1.09139	1.14916	1.04723	1.11128	1.01571		1.15054	1.40734	1.09739	1.02103	1.08865	1.13304	1.25318	1.09049	1.06528	1.37421		1.03499	1.11138	1.35685	1.05065	1.14809	1.18119	1.2265	1.09604	1.04713	1.12019
1.3764	1.09965	1.05993	1.06064	1.03426	1.17246	1.11335	1.17426	1.0752	1.11278		1.09796	1.04466	1.03257	1.17143	1.21522	1.09486	1.15312	1.04421	1.1111	1.01532		1.1465	1.35591	1.04869	1.02487	1.07788	1.15224	1.32048	1.0809	1.07294	1.43833		1.04679	1.16929	1.32588	1.05693	1.14272	1.17386	1.22661	1.09998	1.06414	1.16346
1.34631	1.09957	1.03608	1.06696	1.03962	1.21193	1.10333	1.1724	1.0791	1.05862		1.09105	1.0481	1.03304	1.17074	1.19797	1.09648	1.18257	1.0453	1.11074	1.01686		1.14877	1.37759	1.10149	1.02646	1.06837	1.12442	1.61625	1.11049	1.08078	1.52911		1.05248	1.10634	1.30273	1.05466	1.17339	1.16462	1.22352	1.094	1.01782	1.2075
1.32728	1.09814	1.04081	1.06266	1.03527	1.22632	1.10662	1.16923	1.08119	1.09459		1.09578	1.05085	1.03184	1.16591	1.19562	1.09901	1.18801	1.04664	1.11037	1.01357		1.13816	1.37128	1.11315	1.02138	1.05105	1.12729	1.89363	1.10666	1.06044	1.59377		1.05661	1.13406	1.35462	1.04795	1.15778	1.17167	1.22052	1.09319	1.06692	1.14117
1.24247	1.09851	1.05049	1.06008	1.04226	1.21389	1.09937	1.17374	1.07535	1.12095		1.09332	1.04988	1.03327	1.16597	1.22773	1.10124	1.19876	1.04391	1.1099	1.01572		1.19692	1.35341	1.11383	1.02378	1.11603	1.15191	1.76249	1.08872	1.05032	1.57203		1.03566	1.14132	1.36974	1.04832	1.15066	1.17289	1.22805	1.11161	1.01022	1.19962
1.30032	1.09507	1.03932	1.05957	1.04414	1.23525	1.10857	1.17248	1.07811	1.099		1.09827	1.04638	1.02822	1.1668	1.238	1.10244	1.16693	1.04623	1.10935	1.0153		1.16793	1.34842	1.12615	1.01674	1.17432	1.13314	1.78418	1.11275	1.05782	1.55984		1.0478	1.11505	1.36478	1.04093	1.16858	1.17692	1.23625	1.09282	1	1.1635
1.24336	1.09483	1.04488	1.06352	1.04375	1.24268	1.1006	1.17493	1.07451	1.117		1.09287	1.04881	1.03634	1.16906	1.20199	1.09722	1.17378	1.04838	1.1112	1.01454		1.21789	1.3736	1.13959	1.028	1.16544	1.1688	1.65663	1.07705	1.04564	1.56808		1.05855	1.11923	1.35463	1.03723	1.14779	1.16761	1.23583	1.08276	1.09214	1.20892
1.18768	1.09692	1.08824	1.06036	1.03924	1.22972	1.1014	1.17507	1.07621	1.13354		1.09023	1.05492	1.03253	1.16033	1.23034	1.09188	1.15671	1.04636	1.10939	1.0153		1.20619	1.32753	1.08807	1.02174	1.13326	1.13305	1.6431	1.06914	1.07023	1.57149		1.03199	1.10915	1.33503	1.03358	1.17532	1.16881	1.23721	1.08044	1.05954	1.15245
1.20867	1.0976	1.09561	1.05974	1.03778	1.22159	1.10731	1.1736	1.07093	1.17232		1.09034	1.05217	1.03582	1.16154	1.21184	1.09361	1.1694	1.0484	1.10814	1.01453		1.1694	1.35019	1.07868	1.02963	1.1117	1.12563	1.4544	1.08816	1.10355	1.56187		1.04239	1.10998	1.34432	1.03894	1.15978	1.17321	1.2307	1.0804	1.10512	1.16154
1.22357	1.09488	1.08284	1.06044	1.03491	1.19908	1.11178	1.17586	1.0708	1.12705		1.09407	1.05032	1.03204	1.16422	1.21224	1.08933	1.16992	1.04839	1.10922	1.01642		1.1988	1.31468	1.11215	1.02083	1.11301	1.17134	1.37644	1.07965	1.11975	1.56156		1.03664	1.09011	1.34901	1.02924	1.15545	1.16374	1.23054	1.0782	1.07776	1.19182
1.16274	1.09452	1.09108	1.06343	1.03341	1.16836	1.10381	1.1799	1.08295	1.10656		1.08785	1.04763	1.03138	1.16446	1.2208	1.09178	1.16024	1.04819	1.10543	1.01446		1.18789	1.31852	1.11487	1.02405	1.08929	1.13927	1.30828	1.09128	1.08542	1.55831		1.0482	1.10897	1.3563	1.03046	1.1509	1.16877	1.23849	1.10638	1.05222	1.11991
1.16467	1.0952	1.0647	1.06626	1.03339	1.16972	1.11051	1.1773	1.07402	1.10109		1.08125	1.05051	1.03072	1.16239	1.22867	1.09334	1.2179	1.04778	1.1064	1.0168		1.15137	1.28954	1.1118	1.02438	1.06719	1.12361	1.32449	1.08867	1.09129	1.54548		1.04694	1.13121	1.32729	1.0291	1.14425	1.16457	1.22066	1.12547	1.08047	1.17001
1.14658	1.09529	1.06181	1.06729	1.02863	1.1595	1.10802	1.17987	1.0758	1.1545		1.09006	1.04598	1.03567	1.15875	1.19398	1.09296	1.20685	1.04884	1.10459	1.01667		1.15222	1.31511	1.09649	1.027	1.0572	1.11574	1.21008	1.06218	1.07905	1.53201		1.04104	1.11523	1.34295	1.04018	1.1515	1.1676	1.22412	1.09546	1.05949	1.14084
1.15349	1.09245	1.04838	1.06598	1.03986	1.1829	1.10969	1.185	1.0718	1.11669		1.092	1.04781	1.0353	1.15991	1.22193	1.09581	1.18527	1.04645	1.10352	1.01688		1.13048	1.28109	1.08353	1.02121	1.03914	1.15301	1.27203	1.09747	1.06753	1.55939		1.03485	1.12257	1.35929	1.04005	1.17192	1.16414	1.22225	1.11543	1.0683	1.19866
1.14037	1.09197	1.04668	1.06933	1.03951	1.14138	1.10208	1.18874	1.07065	1.08819		1.0809	1.04899	1.03206	1.15539	1.22692	1.09349	1.18679	1.04726	1.10006	1.01738		1.20025	1.27764	1.03782	1.02363	1.0298	1.15017	1.31371	1.06578	1.03836	1.53503		1.04538	1.07916	1.32537	1.0431	1.16416	1.17254	1.23786	1.12281	1.0928	1.18568
1.14002	1.09014	1.04375	1.06492	1.04595	1.15752	1.10925	1.18569	1.07448	1.13763		1.08483	1.04712	1.03224	1.16018	1.22007	1.0971	1.16919	1.04786	1.10096	1.0165		1.09008	1.27045	1.11775	1.0194	1.02724	1.13369	1.31427	1.07209	1.05782	1.55753		1.05849	1.12286	1.36125	1.04571	1.18142	1.17596	1.23186	1.11427	1.05627	1.13473
1.1684	1.08995	1.04337	1.06791	1.04403	1.15149	1.11086	1.18934	1.07655	1.11994		1.08739	1.05608	1.03093	1.15956	1.20723	1.09109	1.18878	1.04648	1.09896	1.01716		1.12358	1.28851	1.13217	1.02281	1.03585	1.14153	1.18635	1.06591	1.05563	1.56239		1.03842	1.1042	1.31584	1.04402	1.18203	1.19234	1.23661	1.11115	1.06936	1.20123
1.15605	1.09003	1.08777	1.06321	1.0445	1.1709	1.11077	1.18444	1.07712	1.10743		1.0857	1.05314	1.03124	1.15752	1.1857	1.08926	1.19035	1.04688	1.09808	1.01685		1.09647	1.28577	1.13203	1.0277	1.06018	1.12733	1.20193	1.07346	1.04421	1.55429		1.0394	1.12913	1.29392	1.03453	1.153	1.19864	1.23024	1.1112	1.05148	1.12663
1.12883	1.09587	1.10101	1.06799	1.04736	1.16375	1.10917	1.18539	1.07693	1.06947		1.08795	1.05651	1.03196	1.15874	1.16966	1.09143	1.18625	1.04717	1.09744	1.01601		1.14889	1.28214	1.11115	1.024	1.09154	1.1547	1.17727	1.07445	1.1169	1.53586		1.04433	1.11952	1.33034	1.04008	1.16454	1.22335	1.24104	1.12919	1.04285	1.17023
1.15888	1.09776	1.11139	1.07093	1.06035	1.13657	1.09664	1.18788	1.07491	1.1176		1.09953	1.05176	1.03664	1.15366	1.19952	1.09081	1.23369	1.04629	1.09882	1.01712		1.14283	1.24263	1.11544	1.01952	1.10056	1.14456	1.1851	1.07383	1.12489	1.52399		1.02894	1.04726	1.28984	1.0342	1.17177	1.23755	1.24635	1.13277	1.0542	1.19259
1.12591	1.0955	1.07905	1.0644	1.05083	1.16006	1.10306	1.18826	1.07511	1.10152		1.09083	1.04635	1.03395	1.15238	1.22264	1.09095	1.17105	1.04667	1.09808	1.01617		1.13688	1.20327	1.11944	1.02227	1.085	1.12107	1.13696	1.07952	1.12934	1.49983		1.05148	1.11822	1.30265	1.04554	1.14699	1.22777	1.23137	1.15577	1.03678	1.18539
1.09192	1.09365	1.07639	1.06881	1.04261	1.18495	1.1143	1.1837	1.07161	1.09769		1.08916	1.04997	1.0312	1.15784	1.19856	1.09357	1.19306	1.04672	1.09821	1.01412		1.14303	1.20779	1.11369	1.02286	1.06591	1.12471	1.09116	1.0898	1.09137	1.50121		1.04713	1.04328	1.30686	1.05318	1.15562	1.23016	1.2236	1.16782	1.03886	1.13348
1.10932	1.08707	1.06641	1.0722	1.07929	1.19699	1.10553	1.17676	1.07546	1.13867		1.09647	1.05601	1.02641	1.16141	1.20771	1.09358	1.17814	1.04698	1.0976	1.01553		1.14491	1.24148	1.09081	1.02333	1.05241	1.14924	1.13611	1.04915	1.09128	1.48618		1.03262	1.11344	1.35696	1.04715	1.18819	1.22603	1.23809	1.15534	1.05021	1.19396
1.11542	1.0858	1.06914	1.06568	1.13855	1.22771	1.11158	1.18029	1.06569	1.14303		1.09795	1.05546	1.03552	1.15924	1.19923	1.09526	1.21007	1.04531	1.09603	1.01608		1.16263	1.20394	1.10605	1.02523	1.03814	1.14245	1.15966	1.06541	1.08697	1.50152		1.04429	1.13827	1.32376	1.0403	1.15871	1.22892	1.21997	1.13306	1.04211	1.15139
1.10806	1.08644	1.05872	1.06688	1.16214	1.20245	1.11	1.18352	1.07162	1.07535		1.09661	1.05312	1.02505	1.15993	1.18763	1.09614	1.17878	1.045	1.09648	1.01513		1.1255	1.2148	1.11632	1.0244	1.03458	1.15692	1.11679	1.06838	1.0721	1.48945		1.03281	1.12511	1.34429	1.04006	1.1729	1.21206	1.21526	1.1511	1.01088	1.1723
1.08664	1.08378	1.05299	1.06709	1.17083	1.22273	1.1241	1.18658	1.06608	1.07594		1.09031	1.04994	1.03253	1.16942	1.21451	1.09468	1.22477	1.048	1.09577	1.01754		1.2411	1.21151	1.10652	1.02249	1.03526	1.14429	1.0985	1.04487	1.08043	1.49455		1.02974	1.17321	1.34275	1.0357	1.17574	1.21676	1.23353	1.14982	1.03822	1.15577
1.11218	1.08972	1.07403	1.06994	1.15922	1.2178	1.11567	1.18358	1.06032	1.06981		1.10375	1.05314	1.03306	1.16332	1.21093	1.09656	1.19823	1.04759	1.09748	1.0152		1.17919	1.16088	1.11457	1.03113	1.05553	1.1508	1.09047	1.0544	1.06114	1.48947		1.04406	1.12116	1.38001	1.03428	1.17245	1.22108	1.24137	1.1329	1.05544	1.18322
1.12044	1.09653	1.07264	1.06556	1.16576	1.18782	1.12098	1.19468	1.06031	1.08138		1.09777	1.05078	1.02888	1.16691	1.21729	1.09436	1.2192	1.04784	1.09636	1.01581		1.13816	1.24115	1.05977	1.03384	1.07682	1.12214	1.0918	1.06399	1.07213	1.48998		1.03855	1.11355	1.40113	1.03309	1.15975	1.20896	1.24043	1.11301	1.0075	1.16586
1.0886	1.09537	1.09463	1.06518	1.14836	1.21269	1.10518	1.19578	1.06016	1.15781		1.09565	1.05606	1.03184	1.16076	1.221	1.09407	1.226	1.04645	1.0974	1.015		1.15308	1.19577	1.09658	1.09456	1.05899	1.14339	1.15393	1.0383	1.04525	1.47741		1.0267	1.10395	1.34297	1.03513	1.16936	1.22374	1.24396	1.14154	1.07244	1.19538
1.08583	1.09647	1.06496	1.06728	1.13346	1.16358	1.11745	1.1916	1.05873	1.07525		1.10157	1.05598	1.02627	1.15783	1.22269	1.09125	1.20614	1.0474	1.09489	1.01705		1.23634	1.21891	1.11369	1.12688	1.04903	1.13033	1.12717	1.07773	1.0602	1.48117		1.04472	1.05346	1.34133	1.03376	1.15922	1.22825	1.23217	1.14306	1.0646	1.21648
1.13473	1.09275	1.09881	1.06828	1.1318	1.18787	1.10418	1.19432	1.07047	1.15361		1.09652	1.05708	1.02702	1.16704	1.20952	1.09209	1.19042	1.04538	1.09554	1.01543		1.19808	1.18782	1.08636	1.12576	1.0699	1.14806	1.09685	1.06591	1.04082	1.44118		1.04506	1.13837	1.30952	1.03789	1.17645	1.21415	1.22486	1.12622	1.02088	1.14324
1.12482	1.08971	1.08971	1.06666	1.10367	1.17559	1.11633	1.1924	1.07305	1.09293		1.09917	1.05732	1.03328	1.16036	1.23213	1.0902	1.22446	1.04338	1.09482	1.01518		1.18947	1.17138	1.01056	1.10488	1.08356	1.14625	1.21305	1.07682	1.06259	1.45457		1.04293	1.10905	1.32848	1.03348	1.15341	1.2162	1.23162	1.12452	1.03222	1.19546
1.10736	1.088	1.05793	1.06515	1.10488	1.16449	1.11741	1.19234	1.07793	1.10603		1.09667	1.05475	1.03049	1.15654	1.22038	1.09305	1.19952	1.04419	1.09341	1.01575		1.10977	1.15313	1.08782	1.08547	1.07266	1.13663	1.28666	1.05395	1.04636	1.41251		1.04285	1.07286	1.31317	1.03594	1.17635	1.20477	1.23563	1.13724	1.08327	1.18349
1.07547	1.08725	1.09217	1.06745	1.10415	1.17399	1.10526	1.1884	1.07797	1.07229		1.09041	1.05085	1.02936	1.15905	1.19529	1.09324	1.12945	1.04565	1.09343	1.01479		1.13017	1.20579	1.09536	1.05991	1.08059	1.14657	1.21513	1.05502	1.05861	1.4429		1.05145	1.1138	1.33425	1.03767	1.19066	1.1932	1.24756	1.12021	1.07501	1.18785
1.09276	1.08384	1.0904	1.06615	1.08593	1.14464	1.09877	1.18867	1.07769	1.03301		1.09101	1.05311	1.02597	1.16408	1.20947	1.09293	1.20441	1.04502	1.09258	1.01539		1.1258	1.17352	1.09107	1.05217	1.14714	1.11678	1.19463	1.05745	1.05625	1.41748		1.05643	1.09078	1.34061	1.04065	1.16512	1.2012	1.26735	1.13837	1.07909	1.17197
1.11741	1.0837	1.08286	1.06536	1.08401	1.13107	1.11536	1.18535	1.07392	1.1017		1.09351	1.05695	1.03627	1.16472	1.17453	1.09546	1.24432	1.04272	1.09153	1.01624		1.18699	1.22474	1.10097	1.0481	1.22124	1.11941	1.14763	1.06641	1.0406	1.41759		1.05387	1.19537	1.31901	1.0431	1.18629	1.20138	1.26061	1.12579	1.03977	1.12644
1.10143	1.08099	1.10499	1.0688	1.07506	1.10475	1.11779	1.18172	1.06927	1.0708		1.09496	1.05659	1.03209	1.158	1.20082	1.0898	1.21656	1.04245	1.09198	1.0157		1.1629	1.20872	1.10348	1.03533	1.22899	1.11404	1.14819	1.05522	1.03787	1.41692		1.05758	1.09688	1.35169	1.03616	1.18085	1.19448	1.25515	1.12234	1.0328	1.1622
1.0999	1.08405	1.08525	1.0703	1.07543	1.14107	1.12079	1.17937	1.06335	1.07356		1.08946	1.05678	1.03143	1.15902	1.22364	1.08872	1.21228	1.04289	1.09014	1.01641		1.09132	1.20018	1.0698	1.03466	1.20641	1.11095	1.18632	1.07092	1.04394	1.39454		1.04065	1.14959	1.35558	1.04431	1.16895	1.1942	1.26684	1.10838	1.05654	1.1575
1.09393	1.07952	1.08236	1.06872	1.08054	1.18087	1.11241	1.17603	1.0567	1.11732		1.0939	1.06002	1.03167	1.16137	1.18451	1.08742	1.18893	1.04314	1.09015	1.01421		1.1267	1.15813	1.11197	1.02876	1.17668	1.11564	1.19442	1.09178	1.04676	1.39867		1.04828	1.09279	1.34618	1.0491	1.18909	1.22502	1.25721	1.11769	1.0896	1.11656
1.06892	1.08238	1.08112	1.07173	1.06725	1.18566	1.10623	1.17803	1.0593	1.07674		1.09768	1.05264	1.03455	1.16077	1.20499	1.08862	1.2252	1.04224	1.09028	1.01594		1.12324	1.21896	1.10032	1.03072	1.14519	1.13538	1.12498	1.08374	1.03685	1.37829		1.0642	1.09728	1.37501	1.046	1.19059	1.23466	1.25832	1.10995	1.03002	1.18699
1.10746	1.0841	1.05876	1.0678	1.0697	1.2026	1.10637	1.1734	1.05799	1.09106		1.10478	1.05278	1.03235	1.16247	1.19541	1.08694	1.18548	1.04351	1.08964	1.01664		1.25064	1.19714	1.09762	1.03311	1.11248	1.12763	1.19381	1.06601	1.03745	1.37814		1.04681	1.10231	1.35552	1.04518	1.19895	1.23332	1.2521	1.11647	1.06065	1.10626
1.09716	1.0889	1.04635	1.06596	1.0609	1.18483	1.12008	1.17553	1.06355	1.05636		1.10025	1.04692	1.03492	1.16289	1.19338	1.08515	1.22019	1.0427	1.08867	1.01515		1.22592	1.18782	1.09595	1.02411	1.08299	1.1378	1.15185	1.07226	1.04308	1.37632		1.05253	1.11158	1.36585	1.05295	1.18023	1.22672	1.25873	1.14194	1.02895	1.15954
1.09793	1.08908	1.06714	1.0645	1.05013	1.18334	1.10258	1.18059	1.06363	1.13609		1.10227	1.04724	1.0303	1.16575	1.20979	1.08742	1.2577	1.04451	1.08931	1.01515		1.19591	1.21756	1.10836	1.02669	1.07107	1.12865	1.16404	1.08485	1.03164	1.42041		1.04853	1.10503	1.30941	1.05686	1.17723	1.21675	1.25397	1.12173	1.01963	1.15261
1.06553	1.08424	1.05779	1.06705	1.05778	1.16001	1.1082	1.18189	1.07024	1.07708		1.09562	1.04373	1.03011	1.1694	1.17483	1.08722	1.20664	1.04193	1.08905	1.01602		1.05005	1.23372	1.10489	1.02729	1.05309	1.13999	1.11833	1.08304	1.02884	1.39616		1.05089	1.09459	1.33661	1.05477	1.20707	1.21061	1.27528	1.11509	1.04156	1.17666
1.10813	1.07759	1.06623	1.07008	1.05248	1.19456	1.1111	1.18091	1.07374	1.05791		1.09367	1.04194	1.03254	1.16511	1.19358	1.08692	1.18079	1.04144	1.09061	1.01437		1.18719	1.25241	1.0994	1.02293	1.04487	1.13841	1.11959	1.08373	1.05253	1.37994		1.05283	1.10768	1.36208	1.04965	1.21075	1.22443	1.27398	1.16365	1.0874	1.20072
1.06606	1.076	1.06897	1.07244	1.06096	1.15483	1.10387	1.1765	1.0751	1.12956		1.09078	1.0443	1.036	1.16733	1.19467	1.08756	1.21248	1.04191	1.09022	1.01512		1.17569	1.23472	1.06822	1.02686	1.04545	1.11604	1.13214	1.08322	1.04266	1.38672		1.05811	1.08602	1.34342	1.05704	1.18971	1.21998	1.25184	1.16273	1.0468	1.17938
1.06503	1.07638	1.07357	1.07044	1.05624	1.15727	1.11302	1.17742	1.07265	1.10992		1.0975	1.05231	1.03262	1.16999	1.21585	1.08622	1.25337	1.03988	1.09035	1.01548		1.16335	1.26227	1.09396	1.02475	1.03452	1.15373	1.14791	1.07725	1.02938	1.37466		1.04036	1.15173	1.39966	1.05132	1.19067	1.21212	1.2542	1.13915	1.09992	1.19227
1.08234	1.07647	1.06971	1.06883	1.05631	1.1348	1.10896	1.17484	1.07659	1.10099		1.0943	1.04685	1.02664	1.16591	1.19076	1.08794	1.19672	1.04065	1.09155	1.01522		1.19654	1.33262	1.09547	1.02474	1.02871	1.10361	1.21002	1.07123	1.03249	1.36174		1.03953	1.09529	1.40095	1.05752	1.20492	1.2187	1.25876	1.15346	1.14159	1.12783
1.06914	1.08382	1.0667	1.06707	1.06103	1.14778	1.11819	1.17595	1.07303	1.06004		1.09195	1.04949	1.03131	1.17052	1.18413	1.08506	1.21236	1.04085	1.09014	1.01404		1.10691	1.36001	1.10895	1.02294	1.03145	1.12931	1.13086	1.07339	1.01703	1.34648		1.04981	1.13607	1.36792	1.05795	1.20023	1.24014	1.27649	1.16415	1.09425	1.1486
1.07253	1.08254	1.06905	1.0656	1.06375	1.13089	1.11956	1.1739	1.07822	1.11458		1.09957	1.04683	1.0316	1.16764	1.185	1.08626	1.21726	1.04045	1.09096	1.01436		1.19768	1.35231	1.09566	1.01879	1.02803	1.13399	1.09041	1.08833	1.02722	1.33421		1.04884	1.09401	1.36524	1.06467	1.21273	1.23035	1.26587	1.18063	1.0642	1.14213
1.11	1.08231	1.07406	1.06247	1.04807	1.14964	1.12089	1.17921	1.08029	1.09487		1.09763	1.05036	1.0335	1.17272	1.19416	1.08912	1.18085	1.03944	1.09297	1.01264		1.13643	1.40646	1.09083	1.02202	1.0223	1.11971	1.04057	1.07923	1.02423	1.35103		1.05585	1.10927	1.36823	1.06162	1.20524	1.22616	1.2819	1.15939	1.07045	1.15837
1.05146	1.08484	1.05439	1.06506	1.04342	1.11766	1.10394	1.18002	1.07382	1.06372		1.09443	1.0448	1.03392	1.16785	1.19987	1.08403	1.23487	1.0411	1.08994	1.01508		1.16585	1.37489	1.1084	1.02103	1.01789	1.13509	1.1479	1.09876	1.04078	1.37689		1.04668	1.08416	1.34615	1.07492	1.19967	1.21492	1.28569	1.1727	1.08109	1.14964
1.0906	1.08771	1.07963	1.07024	1.04411	1.11675	1.10565	1.17429	1.07731	1.13245		1.09106	1.04908	1.03543	1.16931	1.1962	1.08611	1.23023	1.04027	1.0904	1.01442		1.14655	1.36352	1.10833	1.0217	1.03107	1.14634	1.11643	1.10874	1.04594	1.34287		1.05662	1.12764	1.38448	1.07867	1.2022	1.21649	1.27201	1.14283	1.04445	1.11233
1.10687	1.09181	1.0688	1.06808	1.03795	1.09828	1.10495	1.17949	1.0645	1.06329		1.09225	1.04914	1.03047	1.1727	1.17374	1.08848	1.19371	1.03852	1.08989	1.01544		1.15615	1.40006	1.0984	1.0187	1.01555	1.10329	1.08027	1.09426	1.04635	1.33664		1.05306	1.11872	1.39204	1.07441	1.19506	1.21019	1.29108	1.1558	1.07732	1.14177
1.05083	1.09366	1.07744	1.06716	1.03842	1.10697	1.10576	1.17591	1.06347	1.10224		1.09911	1.04783	1.03298	1.17083	1.18601	1.0891	1.24114	1.03964	1.09251	1.01285		1.09189	1.38846	1.09397	1.01603	1.01851	1.13345	1.13535	1.13423	1.0533	1.3803		1.0533	1.10089	1.3903	1.06237	1.22602	1.21582	1.27776	1.1627	1.07076	1.18834
1.06198	1.09556	1.11668	1.0709	1.03638	1.12091	1.11845	1.16995	1.06159	1.10001		1.08682	1.05019	1.03108	1.17053	1.19917	1.08672	1.21363	1.03743	1.09186	1.01296		1.19196	1.38007	1.09869	1.01808	1.01361	1.12872	1.10655	1.13676	1.02837	1.35712		1.057	1.09432	1.39276	1.05992	1.22341	1.21214	1.28632	1.16846	1.08346	1.17322
1.11902	1.09178	1.11959	1.07287	1.02514	1.13184	1.10393	1.17004	1.05419	1.03909		1.09508	1.05019	1.03556	1.1654	1.17414	1.08883	1.19051	1.03521	1.09347	1.01371		1.12853	1.32821	1.1054	1.01844	1.00964	1.09478	1.12366	1.10617	1.05064	1.37258		1.05719	1.09231	1.37479	1.0611	1.22742	1.22332	1.27166	1.15487	1.0295	1.14423
1.06178	1.08837	1.12534	1.06808	1.03454	1.1496	1.10232	1.17148	1.05557	1.07282		1.09318	1.04183	1.03106	1.17443	1.17421	1.08791	1.21761	1.03495	1.09222	1.01337		1.22918	1.41796	1.07609	1.0212	1.00387	1.15026	1.12728	1.13041	1.04047	1.34735		1.06233	1.08298	1.38216	1.0803	1.22326	1.21062	1.29144	1.17051	1.04522	1.11576
1.10166	1.08952	1.09439	1.06318	1.03784	1.17386	1.10496	1.16694	1.04977	1.10291		1.09967	1.04302	1.0294	1.16878	1.18736	1.08166	1.18559	1.03415	1.09092	1.01336		1.17789	1.42076	1.05886	1.01906	1.00838	1.12851	1.14138	1.12699	1.04789	1.36127		1.06174	1.08677	1.355	1.08038	1.23123	1.207	1.30549	1.17474	1.0294	1.14571
1.08633	1.09289	1.10604	1.06649	1.04138	1.15581	1.10171	1.16408	1.06072	1.08797		1.09645	1.04863	1.03283	1.17209	1.21732	1.08573	1.22861	1.03472	1.09045	1.01445		1.14632	1.37908	1.09272	1.02028	1.00844	1.1255	1.13299	1.09369	1.04032	1.3534		1.06387	1.07894	1.40651	1.08312	1.23023	1.19538	1.29696	1.18052	1.05289	1.15002
1.08711	1.09133	1.08179	1.06857	1.03647	1.10674	1.10195	1.16232	1.06136	1.08693		1.09346	1.05165	1.0324	1.17558	1.17529	1.08511	1.22333	1.03395	1.08765	1.0136		1.18636	1.36015	1.08057	1.02597	1.00539	1.1356	1.10688	1.09712	1.03631	1.32008		1.06182	1.07757	1.395	1.08432	1.20973	1.19757	1.29669	1.16861	1.03197	1.15199
1.0887	1.0912	1.11844	1.07237	1.03934	1.12507	1.10261	1.16251	1.05036	1.08127		1.09255	1.05367	1.03053	1.16975	1.1991	1.08037	1.20929	1.03489	1.08848	1.01287		1.11226	1.37446	1.09253	1.0476	1.00749	1.10546	1.12231	1.10533	1.05088	1.30926		1.06284	1.08333	1.37946	1.06856	1.22456	1.19133	1.29776	1.18473	1.02473	1.1434
1.05472	1.08182	1.09498	1.0631	1.02626	1.15637	1.10188	1.16178	1.05628	1.0693		1.09196	1.05503	1.03145	1.17728	1.19603	1.08365	1.22128	1.03404	1.08774	1.01234		1.15235	1.34427	1.09327	1.06067	1.00363	1.10454	1.14078	1.07952	1.03014	1.30271		1.06917	1.08452	1.36255	1.0616	1.23153	1.18858	1.28945	1.17161	1.05323	1.18839
1.07302	1.08167	1.09387	1.06576	1.02994	1.18027	1.11029	1.16124	1.06092	1.07845		1.09056	1.05523	1.0298	1.17034	1.1867	1.07941	1.19382	1.03314	1.08641	1.01326		1.18814	1.31505	1.10558	1.06643	1.00797	1.12096	1.13145	1.11218	1.03363	1.31656		1.05625	1.07513	1.38137	1.04948	1.24364	1.18247	1.30338	1.17715	1.00461	1.15837
1.08546	1.08342	1.09086	1.06369	1.02998	1.13541	1.1012	1.16233	1.04613	1.13288		1.09825	1.04757	1.03221	1.17036	1.17978	1.07891	1.1988	1.03333	1.08546	1.01293		1.15655	1.42621	1.08572	1.05773	1.00337	1.11588	1.12342	1.11003	1.05436	1.30707		1.06597	1.11819	1.33853	1.05284	1.238	1.18773	1.29821	1.17115	1.01438	1.12639
1.06087	1.08732	1.06944	1.06759	1.03131	1.13681	1.10006	1.16593	1.05345	1.09437		1.09847	1.04082	1.03238	1.17264	1.18194	1.07505	1.20204	1.03309	1.08574	1.01233		1.15339	1.36887	1.05554	1.04993	1.01955	1.11886	1.22608	1.14686	1.04747	1.31499		1.05995	1.08828	1.38429	1.0481	1.21837	1.19029	1.29422	1.16698	1.02653	1.18954
1.09588	1.08667	1.07716	1.06412	1.03191	1.16222	1.10845	1.16736	1.04764	1.08718		1.09962	1.0473	1.02974	1.17225	1.18907	1.07579	1.20784	1.03516	1.08517	1.01243		1.18915	1.31155	1.0884	1.04881	1.01249	1.10133	1.38299	1.09975	1.04225	1.29676		1.06449	1.07936	1.38752	1.04763	1.23803	1.18911	1.3222	1.20475	1.06484	1.13535
1.08769	1.0826	1.06221	1.06684	1.02621	1.09804	1.10401	1.16569	1.04582	1.05322		1.09949	1.05083	1.03268	1.17471	1.18016	1.07533	1.23494	1.03448	1.08295	1.01235		1.18565	1.43146	1.09997	1.05868	1.01829	1.13056	1.79564	1.10229	1.00757	1.28455		1.07117	1.07026	1.38422	1.04549	1.25772	1.17331	1.31758	1.21183	1.07566	1.16169
1.06504	1.08674	1.07085	1.06231	1.03067	1.1183	1.1163	1.15896	1.05362	1.06584		1.09535	1.05252	1.02867	1.17231	1.21399	1.07398	1.23833	1.03232	1.08348	1.01266		1.24328	1.33355	1.11008	1.06117	1.01648	1.10976	1.86753	1.09314	1.04277	1.24694		1.06595	1.07232	1.38263	1.0528	1.25016	1.17762	1.30257	1.19989	1.1403	1.14066
1.12472	1.08456	1.06819	1.06529	1.03837	1.09832	1.10987	1.15638	1.04171	1.03835		1.09054	1.05087	1.03781	1.16785	1.18591	1.07156	1.22393	1.03315	1.08483	1.01091		1.08712	1.32906	1.07433	1.0592	1.01459	1.10522	1.92403	1.09191	1.02448	1.23763		1.07366	1.06057	1.431	1.04861	1.24189	1.18495	1.30403	1.1815	1.0996	1.10999
1.08199	1.08294	1.08655	1.06081	1.03647	1.13516	1.10229	1.14779	1.04668	1.09695		1.09561	1.04923	1.02581	1.1734	1.20056	1.07045	1.22829	1.03228	1.08451	1.01215		1.14315	1.37316	1.09748	1.05784	1.01414	1.12003	1.96411	1.0575	1.03369	1.27211		1.06518	1.08774	1.40236	1.04422	1.23656	1.17755	1.31263	1.18119	1.09152	1.13214
1.07365	1.08204	1.07467	1.06434	1.03875	1.11466	1.09891	1.14473	1.05745	1.12006		1.0997	1.04814	1.03055	1.17663	1.19297	1.07481	1.22522	1.03308	1.08172	1.0127		1.11564	1.3897	1.10403	1.04759	1.01376	1.11599	1.91665	1.11566	1.02518	1.24382		1.06772	1.08462	1.35411	1.05369	1.23734	1.18351	1.30205	1.15575	1.04981	1.12181
1.05578	1.08474	1.08994	1.06728	1.03257	1.12457	1.1078	1.14232	1.04919	1.1304		1.10206	1.04677	1.03123	1.1718	1.21381	1.07309	1.22341	1.03387	1.08307	1.01213		1.20894	1.36954	1.11017	1.0395	1.03029	1.11737	1.85072	1.08333	1.02801	1.23397		1.07216	1.12217	1.36656	1.05683	1.22077	1.19543	1.31026	1.15766	1.07502	1.13091
1.08289	1.0851	1.11001	1.06784	1.02994	1.12127	1.11186	1.14163	1.04774	1.07311		1.10066	1.04559	1.03099	1.17404	1.18497	1.07287	1.24858	1.03361	1.08252	1.01282		1.12306	1.28667	1.07557	1.03329	1.0329	1.1141	1.78921	1.07271	1.03611	1.23514		1.04964	1.14721	1.39214	1.06017	1.22887	1.19812	1.31612	1.14886	1.07653	1.14071
1.07011	1.08466	1.09458	1.06791	1.03641	1.09795	1.10338	1.13878	1.03901	1.05176		1.09756	1.04963	1.03046	1.17416	1.18893	1.07176	1.24283	1.03202	1.08139	1.01301		1.08708	1.31284	1.11527	1.03325	1.02348	1.12375	1.73344	1.07217	1.03507	1.26117		1.06525	1.16342	1.40098	1.05378	1.23383	1.19567	1.32328	1.14648	1.09205	1.10491
1.08342	1.07752	1.07627	1.06282	1.03524	1.12054	1.09777	1.13949	1.03961	1.07684		1.1081	1.05499	1.02785	1.17727	1.20935	1.07313	1.24949	1.03174	1.07977	1.01274		1.21591	1.28621	1.11387	1.09063	1.02585	1.12678	1.54089	1.06558	1.03117	1.28333		1.0598	1.16483	1.33852	1.06086	1.23675	1.18568	1.31283	1.15896	1.08281	1.17065
1.11014	1.07611	1.08098	1.06132	1.03496	1.08076	1.08781	1.13811	1.01971	1.08626		1.09713	1.05153	1.03099	1.17413	1.17484	1.07388	1.25516	1.03152	1.07972	1.01278		1.19229	1.32732	1.11894	1.13815	1.01396	1.11317	1.55518	1.09107	1.01972	1.26032		1.04926	1.15009	1.36984	1.0509	1.23321	1.16814	1.32309	1.18322	1.12826	1.10939
1.05696	1.0775	1.09504	1.06458	1.02646	1.13519	1.10278	1.13612	1.0192	1.05546		1.10378	1.04931	1.02798	1.17525	1.23638	1.07197	1.20384	1.03243	1.08024	1.0117		1.20356	1.2895	1.11707	1.13738	1.01808	1.11514	1.42555	1.05016	1.02161	1.24523		1.05732	1.13624	1.37216	1.05657	1.25424	1.16674	1.30926	1.15672	1.13173	1.12883
1.07235	1.08301	1.09911	1.06183	1.03253	1.117	1.09087	1.13804	1.01718	1.07959		1.11406	1.04954	1.037	1.17453	1.20231	1.07584	1.25065	1.02981	1.08073	1.01211		1.2181	1.28138	1.11082	1.11048	1.01609	1.1124	1.26724	1.07245	1.02802	1.24661		1.06996	1.13621	1.36489	1.05279	1.23075	1.17914	1.32105	1.16673	1.12577	1.11518
1.08125	1.08269	1.09288	1.06434	1.03326	1.09725	1.08699	1.12444	1.01711	1.11042		1.09601	1.05529	1.0309	1.17082	1.18759	1.08001	1.25311	1.03094	1.08052	1.01333		1.13182	1.28424	1.12049	1.0903	1.02729	1.09382	1.22671	1.06017	1.01596	1.25393		1.04798	1.12827	1.38894	1.06085	1.23781	1.1788	1.36762	1.16702	1.104	1.14806
1.05899	1.08362	1.09428	1.06635	1.01971	1.16747	1.07883	1.12123	1.02905	1.13224		1.10273	1.05515	1.03221	1.16706	1.20951	1.08113	1.25914	1.03086	1.07868	1.01168		1.20847	1.29754	1.14522	1.07612	1.022	1.11082	1.23513	1.04865	1.03149	1.25392		1.0506	1.11586	1.38724	1.05636	1.26398	1.17597	1.44663	1.15094	1.07611	1.1652
1.071	1.07848	1.07783	1.06682	1.02286	1.11152	1.09051	1.11359	1.03273	1.1114		1.1044	1.04703	1.03125	1.16925	1.2047	1.08123	1.25253	1.03038	1.08017	1.01113		1.10205	1.25473	1.13238	1.05798	1.01636	1.12514	1.25856	1.04425	1.03408	1.23424		1.04985	1.05986	1.37817	1.04745	1.23848	1.18307	1.41409	1.15135	1.03441	1.12459
1.06587	1.07688	1.07209	1.06601	1.02458	1.13	1.07229	1.10964	1.03022	1.03622		1.10438	1.0466	1.02888	1.16795	1.22864	1.0831	1.26366	1.02973	1.08022	1.01214		1.12053	1.26057	1.13788	1.04799	1.01978	1.13319	1.2493	1.05663	1.01027	1.23431		1.05957	1.0996	1.36069	1.04751	1.24688	1.18885	1.4328	1.16147	1.05047	1.10723
1.09441	1.07014	1.09198	1.067	1.0285	1.13169	1.09352	1.10392	1.03175	1.08928		1.0963	1.0516	1.02854	1.16364	1.20503	1.08132	1.26166	1.02963	1.08137	1.0119		1.13214	1.29748	1.12438	1.03665	1.02223	1.08585	1.14252	1.04096	1.023	1.23617		1.04571	1.08299	1.3951	1.04664	1.2622	1.20287	1.4272	1.172	1.02736	1.17456
1.03951	1.06975	1.08676	1.06449	1.03224	1.12178	1.07418	1.09456	1.03362	1.05651		1.10316	1.05381	1.03048	1.16615	1.20201	1.08249	1.2282	1.02914	1.08127	1.01205		1.14594	1.28469	1.15495	1.03743	1.01295	1.11844	1.32904	1.0398	1.01541	1.23678		1.05301	1.08051	1.3669	1.05154	1.2468	1.22659	1.40801	1.14764	1.04895	1.11268
1.08399	1.06931	1.07479	1.06347	1.04248	1.10673	1.06909	1.09823	1.03033	1.10495		1.10199	1.05246	1.03483	1.16431	1.18736	1.08296	1.24686	1.02751	1.07996	1.01258		1.14491	1.29856	1.09681	1.02659	1.01047	1.11909	1.58115	1.0637	1.03023	1.22308		1.04366	1.15336	1.3962	1.05235	1.25328	1.21878	1.41514	1.13972	1.00701	1.12167
1.05487	1.0747	1.08985	1.0678	1.04021	1.11387	1.08154	1.09256	1.02793	1.05247		1.09228	1.05738	1.02878	1.16228	1.18826	1.0813	1.2664	1.02866	1.08001	1.01256		1.15485	1.25602	1.11517	1.02481	1.01042	1.11901	2.01314	1.06411	1.00804	1.20303		1.03623	1.17742	1.39426	1.05847	1.23592	1.23687	1.4058	1.15886	1.02164	1.09235
1.08429	1.07877	1.08717	1.06717	1.03551	1.08476	1.08904	1.08923	1.02854	1.06676		1.10313	1.05653	1.02898	1.16006	1.18412	1.07733	1.29648	1.02709	1.07956	1.01073		1.15857	1.26281	1.09803	1.02678	1.01135	1.12189	2.08424	1.04652	1.03012	1.19416		1.04984	1.10568	1.36237	1.05485	1.25954	1.23239	1.38779	1.1751	1.0534	1.14713
1.04364	1.0742	1.07197	1.07112	1.03646	1.12719	1.08014	1.08748	1.02937	1.08902		1.09964	1.05476	1.02802	1.16252	1.17622	1.07548	1.25616	1.0273	1.08	1.01272		1.15986	1.20224	1.09859	1.02339	1.02696	1.10095	1.99423	1.03523	1.02099	1.16094		1.04553	1.07165	1.37391	1.06193	1.25298	1.2304	1.41602	1.17443	1.04739	1.15803
1.08711	1.06822	1.06285	1.06959	1.03965	1.10992	1.07202	1.08103	1.0264	1.10188		1.10136	1.05543	1.02988	1.16352	1.20538	1.07414	1.25358	1.02697	1.08214	1.01153		1.19159	1.24876	1.10021	1.02629	1.05414	1.13197	1.96216	1.04757	1.02347	1.14358		1.04759	1.09517	1.39754	1.06937	1.26157	1.21547	1.39582	1.17534	1.07562	1.09901
1.09746	1.07116	1.0808	1.06793	1.0328	1.08159	1.06897	1.0804	1.02272	1.06303		1.10464	1.05418	1.02884	1.16084	1.20436	1.07564	1.26897	1.02594	1.08121	1.01185		1.1758	1.29309	1.03199	1.01934	1.0428	1.09084	1.93419	1.06499	1.01888	1.11454		1.04032	1.10181	1.38576	1.08371	1.24313	1.22486	1.40136	1.15817	1.0555	1.15071
1.09745	1.07025	1.07413	1.06804	1.04359	1.13702	1.07585	1.07821	1.02491	1.05796		1.09847	1.05256	1.02857	1.15693	1.19852	1.07067	1.20288	1.02548	1.08262	1.01094		1.13266	1.23343	1.06062	1.02418	1.04623	1.12651	1.95156	1.0516	1.03948	1.10584		1.03989	1.06654	1.37075	1.07943	1.24186	1.23189	1.41304	1.18219	1.09207	1.11796
1.04667	1.0688	1.08762	1.06122	1.03284	1.10891	1.08033	1.07945	1.02584	1.06872		1.096	1.05582	1.0339	1.16374	1.19326	1.0724	1.24564	1.02529	1.08205	1.01144		1.20083	1.25571	1.10644	1.01733	1.0327	1.0852	1.86076	1.04895	1.01858	1.09552		1.02714	1.06149	1.39633	1.06839	1.25831	1.23124	1.39381	1.16987	1.0831	1.12019
1.02648	1.06824	1.10394	1.05763	1.01957	1.10439	1.07023	1.07307	1.01996	1.03394		1.10344	1.05429	1.02903	1.16282	1.18159	1.07306	1.26301	1.02457	1.08327	1.01268		1.22255	1.2104	1.12664	1.0194	1.03233	1.11414	1.76785	1.06742	1.03204	1.08551		1.04607	1.10232	1.41407	1.0665	1.23774	1.25574	1.37539	1.1538	1.04419	1.11352
1.0554	1.06611	1.11372	1.07116	1.02901	1.12024	1.07517	1.07139	1.01792	1.06611		1.10595	1.05111	1.02946	1.16097	1.20852	1.07453	1.25975	1.02406	1.08136	1.01534		1.16725	1.21712	1.12617	1.02141	1.03327	1.09704	1.64966	1.0305	1.03631	1.08742		1.04619	1.0887	1.40383	1.06408	1.23984	1.25089	1.38073	1.16043	1.0821	1.14891
1.07833	1.06558	1.14297	1.06781	1.02133	1.13629	1.07578	1.06481	1.01596	1.07117		1.09943	1.05265	1.03387	1.16019	1.17065	1.0747	1.21807	1.02402	1.08281	1.01378		1.18237	1.23915	1.11592	1.02385	1.02152	1.08541	1.59688	1.04372	1.03326	1.0852		1.04092	1.08365	1.38263	1.06508	1.24946	1.2568	1.37034	1.16441	1.06703	1.15788
1.08449	1.07051	1.11402	1.06745	1.01504	1.1351	1.07631	1.05904	1.00866	1.04424		1.1007	1.05651	1.03273	1.15822	1.23458	1.07038	1.24912	1.02328	1.08045	1.01295		1.16658	1.23067	1.12097	1.02174	1.01883	1.09959	1.36319	1.04859	1.02309	1.08559		1.0335	1.13005	1.37158	1.05534	1.24534	1.24941	1.35752	1.15038	1.1173	1.15429
1.04395	1.07216	1.12966	1.06931	1.02218	1.12989	1.06176	1.0593	1.01928	1.07983		1.10525	1.0599	1.03177	1.15693	1.19149	1.06941	1.25809	1.02237	1.08096	1.01383		1.15156	1.1915	1.1111	1.01859	1.00893	1.08685	1.34679	1.02529	1.01823	1.07785		1.0417	1.16549	1.38794	1.06121	1.24507	1.25837	1.349	1.18164	1.09261	1.1231
1.07101	1.07124	1.10492	1.06802	1.02271	1.14477	1.06887	1.05107	1.01937	1.08773		1.1082	1.06262	1.02833	1.15706	1.21317	1.06818	1.24662	1.01945	1.08198	1.01334		1.16811	1.27278	1.10736	1.02011	1.0143	1.09428	1.26807	1.04317	1.02214	1.07335		1.03725	1.21636	1.39521	1.06081	1.2591	1.26256	1.36259	1.16999	1.06118	1.18119
1.10439	1.07706	1.10425	1.06242	1.02714	1.13611	1.08191	1.05171	1.02264	1.03018		1.1067	1.06252	1.02734	1.15774	1.19714	1.06598	1.26242	1.01825	1.08095	1.0144		1.16457	1.24966	1.12254	1.02311	1.0052	1.11628	1.2393	1.06588	1.02267	1.06812		1.03225	1.15023	1.39523	1.05314	1.25704	1.27171	1.35848	1.14421	1.02674	1.13972
1.04719	1.07471	1.0946	1.06679	1.02705	1.13776	1.08575	1.05114	1.01925	1.05766		1.09622	1.06261	1.02793	1.15625	1.18406	1.06517	1.27537	1.0203	1.08009	1.01261		1.1816	1.22108	1.11132	1.01804	1.0114	1.10277	1.20782	1.06072	1.01625	1.06463		1.03704	1.15089	1.35736	1.04909	1.25535	1.26515	1.35564	1.15241	1.015	1.09259
1.09574	1.07803	1.11037	1.06572	1.03043	1.12511	1.075	1.04729	1.02111	1.08555		1.11169	1.06554	1.03298	1.15865	1.19811	1.06575	1.25078	1.02123	1.08091	1.01475		1.22726	1.2152	1.11547	1.0159	1.00923	1.10912	1.21101	1.03031	1.01668	1.05957		1.02584	1.11696	1.36349	1.04483	1.26417	1.27052	1.36285	1.17006	1.03442	1.12499
1.06722	1.07839	1.08716	1.06657	1.03173	1.13313	1.0764	1.04496	1.024	1.01563		1.10977	1.06104	1.02761	1.15582	1.17753	1.06382	1.26965	1.02	1.08002	1.01374		1.26188	1.2556	1.06984	1.01035	1.0131	1.11328	1.15911	1.05483	1	1.06778		1.02808	1.10326	1.37803	1.05354	1.25859	1.27973	1.36365	1.18101	1.0603	1.14509
1.08284	1.07871	1.09742	1.06481	1.02403	1.07806	1.0799	1.04266	1.01904	1.08246		1.10575	1.05698	1.0287	1.15273	1.16983	1.06282	1.22714	1.02225	1.08097	1.01243		1.20868	1.23154	1.10267	1.01465	1.00727	1.11036	1.20182	1.03631	1.03348	1.06827		1.01778	1.1181	1.39343	1.05064	1.26902	1.26337	1.35446	1.14606	1.02884	1.15988
1.07855	1.07542	1.08098	1.06253	1.02687	1.09178	1.07915	1.042	1.02166	1.07012		1.11026	1.05975	1.02754	1.15132	1.17915	1.06489	1.25166	1.02143	1.07852	1.01424		1.23301	1.24222	1.11236	1.01547	1.00883	1.11393	1.12516	1.03857	1.0393	1.0731		1.03323	1.11765	1.3958	1.0444	1.26958	1.2499	1.31793	1.18042	1.05413	1.16609
1.05265	1.0726	1.11332	1.06312	1.01676	1.09264	1.0767	1.03959	1.01724	1.08146		1.10834	1.06062	1.02738	1.15381	1.18962	1.06613	1.25616	1.02153	1.08215	1.01406		1.16149	1.27428	1.10912	1.01492	1.00611	1.11907	1.1961	1.0344	1.03159	1.04949		1.0244	1.10007	1.37739	1.04158	1.25424	1.23674	1.32306	1.16013	1.04442	1.13499
1.08145	1.07286	1.11532	1.06801	1.01693	1.10934	1.08138	1.03819	1.02423	1.08977		1.10312	1.05729	1.03081	1.15351	1.18616	1.06773	1.25681	1.02227	1.08185	1.01253		1.18939	1.1706	1.0992	1.01152	1.0168	1.12648	1.27998	1.02862	1.0341	1.06901		1.0267	1.07771	1.42998	1.04079	1.26033	1.23633	1.31388	1.17233	1.01704	1.13215
1.05889	1.07682	1.1133	1.06593	1.01489	1.11275	1.07143	1.03336	1.0204	1.09974		1.11191	1.05821	1.02643	1.15711	1.1931	1.06701	1.25881	1.02202	1.08199	1.01222		1.15505	1.22873	1.10545	1.0158	1.01222	1.10321	1.37972	1.06182	1.03023	1.05736		1.01883	1.10549	1.40974	1.04207	1.25363	1.24535	1.31607	1.1645	1.05752	1.05559
1.05944	1.08057	1.11344	1.06182	1.02408	1.11873	1.07194	1.03564	1.01664	1.08564		1.10569	1.06037	1.02836	1.14981	1.2241	1.06292	1.28755	1.02324	1.08119	1.01293		1.16791	1.18894	1.11024	1.00835	1.02502	1.11227	1.68858	1.05122	1.02093	1.07114		1.02827	1.09086	1.40221	1.04254	1.25289	1.2439	1.3388	1.14752	1.1119	1.12038
1.07155	1.07473	1.11134	1.06441	1.02823	1.10507	1.07597	1.0373	1.00754	1.09747		1.10511	1.0608	1.03223	1.1501	1.1732	1.0697	1.2753	1.02268	1.08094	1.01171		1.10194	1.17721	1.10462	1.01625	1.02647	1.10641	1.84865	1.02866	1.03682	1.06113		1.04032	1.09413	1.41859	1.03736	1.27208	1.22799	1.32797	1.17427	1.12663	1.12372
1.0406	1.07403	1.10221	1.06322	1.04547	1.1278	1.07401	1.03633	1.00489	1.04503		1.10029	1.05838	1.02868	1.14993	1.21099	1.06708	1.29031	1.02266	1.08266	1.01117		1.16308	1.2386	1.11881	1.01285	1.0275	1.1006	1.90946	1.01919	1.02775	1.06846		1.02008	1.10814	1.38943	1.04692	1.2747	1.22036	1.32203	1.16579	1.10026	1.10883
1.07884	1.07428	1.12149	1.06749	1.04901	1.12713	1.05809	1.03097	1.00327	1.04312		1.10629	1.05868	1.02548	1.14587	1.18222	1.06782	1.28785	1.02142	1.08015	1.01322		1.14165	1.21073	1.1019	1.01494	1.0241	1.10205	1.97796	1.03192	1.02457	1.05212		1.02125	1.08759	1.4209	1.04333	1.28357	1.22614	1.31513	1.16813	1.09131	1.11275
1.08915	1.07268	1.09941	1.06629	1.04512	1.15828	1.07201	1.0308	1	1.05464		1.10329	1.05983	1.03295	1.14908	1.16584	1.06969	1.27215	1.02143	1.08045	1.01281		1.14178	1.19464	1.10721	1.00974	1.01008	1.11632	1.88838	1.01728	1.02574	1.05063		1.01777	1.05883	1.39867	1.0443	1.28877	1.21623	1.32027	1.1539	1.08652	1.10285
1.06626	1.08148	1.09131	1.06565	1.03275	1.12129	1.08262	1.02766	1.00666	1.05279		1.10661	1.06442	1.0294	1.14943	1.2039	1.06695	1.25796	1.02169	1.08197	1.01175		1.17511	1.21693	1.09169	1.01619	1.00048	1.11794	1.70669	1.03429	1.03753	1.05691		1.01268	1.13608	1.36869	1.04824	1.27823	1.229	1.33116	1.15069	1.13863	1.05818
1.08067	1.08611	1.10441	1.06788	1.03659	1.09679	1.07816	1.02798	1.00906	1.0863		1.10864	1.06255	1.03355	1.14894	1.18463	1.07233	1.2665	1.02091	1.08301	1.01434		1.14149	1.18502	1.07587	1.01388	1.00848	1.10588	1.69692	1.0352	1.02648	1.06481		1.01848	1.08352	1.37089	1.0597	1.29185	1.23069	1.34336	1.16398	1.14008	1.11024
1.06945	1.08966	1.07564	1.06379	1.03406	1.12926	1.08039	1.02801	1.0111	1.03266		1.10646	1.05412	1.03093	1.15198	1.19446	1.07123	1.19508	1.0186	1.08446	1.01126		1.16107	1.18702	1.11597	1.01218	1.01534	1.11587	1.37095	1.03832	1.02126	1.07822		1.0147	1.0778	1.36244	1.06178	1.27847	1.23328	1.41479	1.15204	1.09842	1.10882
1.05952	1.09289	1.09162	1.06808	1.03995	1.12426	1.06632	1.02168	1.01934	1.01481		1.10871	1.05889	1.03292	1.1435	1.17034	1.07023	1.2566	1.01906	1.08492	1.01131		1.18675	1.20918	1.09795	1.00837	1.01234	1.09396	1.41403	1.03092	1.03609	1.048		1.01846	1.09336	1.37449	1.05451	1.26318	1.21997	1.43529	1.16463	1.13446	1.10812
1.07868	1.09808	1.07692	1.0684	1.04281	1.10483	1.06479	1.02119	1.02873	1.00828		1.10728	1.06662	1.02992	1.14413	1.14321	1.07019	1.26431	1.01779	1.08501	1.01152		1.19884	1.20698	1.10583	1.00645	1.01035	1.09871	1.48893	1.0496	1.03004	1.05332		1.00511	1.11096	1.38477	1.05345	1.2853	1.23019	1.44847	1.14847	1.10474	1.11995
1.03019	1.09901	1.10367	1.06615	1.04288	1.12127	1.06361	1.01801	1.02493	1.04822		1.11091	1.06409	1.02808	1.14574	1.17447	1.06491	1.269	1.01819	1.08522	1.01298		1.18165	1.23339	1.09709	1.00684	1.01946	1.07834	1.30785	1.0476	1.01456	1.06671		1.01244	1.04726	1.36409	1.05239	1.27165	1.22473	1.4314	1.18639	1.11573	1.12091
1.10588	1.09976	1.11051	1.06174	1.05151	1.15915	1.07168	1.0172	1.02348	1.07944		1.11234	1.06418	1.02373	1.14653	1.18071	1.0635	1.27038	1.01576	1.08294	1.01053		1.22449	1.16604	1.05776	1.00914	1.00985	1.11362	1.29337	1.02239	1.03625	1.05129		1.02274	1.06745	1.37329	1.0561	1.26863	1.2086	1.42903	1.17967	1.14763	1.14422
1.05217	1.10651	1.12607	1.06389	1.04702	1.13599	1.05589	1.02121	1.02097	1.03124		1.11401	1.06449	1.02772	1.14724	1.19308	1.06129	1.30147	1.01673	1.08398	1.01241		1.15566	1.21174	1.08889	1.01475	1.01418	1.11809	1.3216	1.05887	1.03014	1.05533		1.00788	1.08506	1.36609	1.05591	1.27901	1.21547	1.41125	1.16777	1.10069	1.10443
1.05001	1.10075	1.10561	1.06404	1.05545	1.10586	1.06177	1.01622	1.02474	1.04773		1.11516	1.06249	1.02961	1.14302	1.21712	1.06468	1.24055	1.01802	1.08163	1.01092		1.24535	1.16663	1.09338	1.00679	1.01144	1.11738	1.25717	1.03913	1.01711	1.04933		1.00496	1.13024	1.40196	1.05081	1.28051	1.18876	1.40199	1.20345	1.10459	1.09274
1.04817	1.10552	1.12708	1.06545	1.04355	1.11548	1.07787	1.02062	1.03188	1.07294		1.12195	1.06419	1.03097	1.14525	1.18911	1.06376	1.28203	1.01822	1.08477	1.0126		1.1393	1.18338	1.11509	1.00683	1.01155	1.11808	1.28812	1.00218	1.02334	1.05928		1.01111	1.06763	1.39202	1.04849	1.27219	1.18574	1.39413	1.19577	1.10989	1.09358
1.07973	1.09934	1.10702	1.06733	1.05084	1.1202	1.0579	1.01345	1.02616	1.06713		1.12233	1.06749	1.02337	1.14594	1.21702	1.06259	1.28098	1.01784	1.08582	1.01151		1.21476	1.23127	1.10983	1.00875	1.01564	1.06892	1.26886	1.02944	1.02472	1.0454		1.01406	1.06576	1.39459	1.05559	1.27003	1.20589	1.40655	1.20488	1.11738	1.12795
1.03933	1.09886	1.13026	1.06553	1.04755	1.12944	1.0701	1.01572	1.02502	1.04731		1.11871	1.06544	1.02771	1.14006	1.18194	1.06488	1.27275	1.01525	1.08339	1.01056		1.18823	1.15766	1.12036	1.00424	1.00846	1.07948	1.25328	1.04054	1.02469	1.05154		1.02624	1.06059	1.40317	1.04541	1.27341	1.19219	1.39614	1.213	1.1213	1.119
1.06736	1.09558	1.11226	1.06656	1.0415	1.19666	1.06065	1.01335	1.02193	1.08371		1.11087	1.05958	1.0321	1.14628	1.21774	1.06628	1.28981	1.01733	1.0835	1.01027		1.14787	1.16302	1.11504	1.00522	1	1.07299	1.19213	1.02585	1.00319	1.06051		1.02509	1.05313	1.38661	1.0429	1.27779	1.19187	1.41304	1.24594	1.14962	1.10566
1.07586	1.09456	1.12469	1.06764	1.04146	1.16057	1.05243	1.01459	1.02247	1		1.11356	1.06143	1.026	1.14602	1.2122	1.06088	1.3239	1.01459	1.08217	1.01208		1.18674	1.18843	1.1052	1.00553	1.02108	1.06605	1.12967	1.05021	1.03306	1.0521		1.00107	1.07023	1.38505	1.05983	1.28827	1.18966	1.39793	1.2327	1.17612	1.08177
1.05726	1.09647	1.12543	1.06704	1.04903	1.16732	1.06196	1.01429	1.02253	1.09617		1.11694	1.06603	1.02226	1.14555	1.19684	1.0662	1.26109	1.01531	1.08387	1.01162		1.20401	1.15769	1.1079	1.00443	1.01357	1.08515	1.16367	1.02495	1.01927	1.04783		1.01276	1.05536	1.36447	1.06497	1.26875	1.18477	1.38638	1.21957	1.13079	1.08381
1.05947	1.09502	1.10853	1.06251	1.04663	1.1286	1.05558	1.01524	1.02381	1.06318		1.1102	1.0638	1.03051	1.14484	1.17264	1.06391	1.28222	1.01436	1.08407	1.00947		1.16023	1.16362	1.08683	1.00458	1.02159	1.05707	1.20107	1.03025	1.01209	1.05911		1.02639	1.05205	1.37015	1.06222	1.26484	1.19378	1.37627	1.21069	1.06319	1.10893
1.06017	1.08849	1.12841	1.06324	1.04951	1.13027	1.05728	1.0117	1.01638	1.10383		1.11072	1.06414	1.0274	1.14002	1.20783	1.06569	1.29593	1.01378	1.08343	1.00928		1.2328	1.14993	1.08487	1.00046	1.01318	1.08436	1.11813	1.0393	1.02019	1.06434		1.0213	1.06529	1.3536	1.06188	1.2768	1.19544	1.40059	1.20749	1.10042	1.07711
1.04725	1.08977	1.12178	1.05535	1.04289	1.1334	1.06283	1.00758	1.01259	1.06767		1.12266	1.05949	1.02766	1.14116	1.20584	1.06781	1.28239	1.01265	1.08449	1.00899		1.17938	1.138	1.07505	1.00565	1.01059	1.08544	1.3356	1.028	1.02545	1.07402		1.01793	1.0561	1.39265	1.04428	1.2827	1.20212	1.39004	1.21418	1.2026	1.06211
1.08355	1.08113	1.11276	1.05829	1.03775	1.14226	1.0647	1.01031	1.0144	1.05345		1.12081	1.06006	1.02892	1.1441	1.18888	1.06526	1.28269	1.01363	1.08353	1.00914		1.18293	1.15103	1.09053	1.00643	1.01338	1.06157	1.35582	1.02509	1.01351	1.06066		1.01366	1.0435	1.35501	1.04048	1.28402	1.18478	1.38775	1.21827	1.17582	1.07324
1.0439	1.06927	1.10848	1.05632	1.03339	1.10948	1.05	1.00998	1.0124	1.00934		1.11509	1.05501	1.0288	1.14279	1.19944	1.0693	1.30957	1.01381	1.08402	1.00912		1.19428	1.12883	1.12168	1.0095	1.0115	1.07555	1.68037	1.00748	1.02435	1.05686		1.01102	1.05986	1.36843	1.04363	1.30349	1.18375	1.37694	1.20543	1.16274	1.06679
1.04231	1.06248	1.12126	1.05341	1.05073	1.11279	1.05434	1.0077	1.01123	1.06898		1.11835	1.05394	1.02781	1.14711	1.23423	1.07084	1.28821	1.01325	1.08482	1.00897		1.2294	1.11243	1.02868	1	1.01996	1.06386	1.70793	1	1.04426	1.06538		1.01174	1.0612	1.3424	1.04554	1.30558	1.18414	1.36304	1.20333	1.16685	1.08305
1.07371	1.0611	1.10903	1.05066	1.03367	1.11857	1.04683	1.00996	1.01453	1.05622		1.11652	1.05373	1.02458	1.14358	1.19054	1.06866	1.29918	1.01462	1.0843	1.00835		1.10776	1.14748	1.10357	1.00506	1.00858	1.07575	1.71818	1.01685	1.01917	1.06821		1.01517	1.0621	1.33084	1.03888	1.31479	1.18519	1.37838	1.2251	1.16354	1.04336
1.08981	1.05946	1.09931	1.04692	1.02915	1.13045	1.06129	1.01003	1.01843	1.05845		1.1166	1.06161	1.02744	1.14447	1.20661	1.06861	1.28179	1.01393	1.0834	1.01007		1.16534	1.09587	1.10692	1.00571	1.01288	1.06014	1.73795	1.00503	1.0274	1.05847		1.02449	1.08184	1.36604	1.03381	1.31798	1.18121	1.36377	1.2212	1.16882	1.09266
1.03268	1.05175	1.10346	1.04253	1.03117	1.06968	1.06489	1.00687	1.01559	1.07836		1.12658	1.06083	1.02803	1.14723	1.17905	1.06684	1.28062	1.01671	1.0845	1.00835		1.17514	1.1155	1.09485	1.0091	1.00802	1.06293	1.74708	1.02437	1.03296	1.05042		1.01341	1.09826	1.36863	1.03423	1.30076	1.17205	1.35557	1.20345	1.1262	1.1022
1.0336	1.05335	1.11648	1.0392	1.03532	1.06184	1.05311	1.00614	1.02085	1.02726		1.11335	1.0608	1.02114	1.14495	1.1772	1.06624	1.2832	1.01637	1.08719	1.00934		1.19341	1.11499	1.11922	1.01373	1.00725	1.06385	1.8743	1.02625	1.02449	1.04745		1.01173	1.07807	1.37311	1.04406	1.31505	1.16095	1.35236	1.20549	1.19171	1.09423
1.05776	1.05007	1.10154	1.03373	1.03391	1.05306	1.05673	1.00519	1.01868	1.07752		1.11048	1.06534	1.02591	1.14176	1.19938	1.06414	1.25881	1.01665	1.08617	1.0084		1.23816	1.12733	1.10657	1.01574	1.00762	1.05677	1.66789	1.036	1.02898	1.05564		1.00731	1.1224	1.39594	1.0372	1.30722	1.16111	1.36734	1.28299	1.18686	1.07663
1.05326	1.0491	1.11506	1.03767	1.04228	1.09291	1.04778	1.00347	1.01734	1.08265		1.11069	1.06127	1.02565	1.1401	1.16976	1.06542	1.31237	1.01448	1.08527	1.00688		1.2149	1.07089	1.11056	1.00707	1.00604	1.04637	1.70926	1.02627	1.02894	1.06999		1.02738	1.0315	1.39076	1.03604	1.31612	1.1563	1.36178	1.41861	1.14183	1.09581
1.02812	1.04194	1.11976	1.02689	1.03979	1.08406	1.05181	1	1.02069	1.01928		1.11315	1.06346	1.02903	1.14314	1.20104	1.06422	1.24966	1.01435	1.08692	1.00737		1.17474	1.15025	1.10761	1.01333	1.00185	1.06447	1.71528	1.02531	1.02404	1.06359		1.03294	1.10438	1.38904	1.06189	1.29335	1.15597	1.36555	1.66722	1.16006	1.11285
1.04512	1.03957	1.1165	1.02494	1.02949	1.05163	1.05942	1.00102	1.02221	1.08973		1.11843	1.06245	1.02778	1.14004	1.17173	1.06399	1.28673	1.01351	1.08694	1.00866		1.16807	1.09479	1.10438	1.01189	1.00778	1.06032	1.47966	1.0126	1.01605	1.06176		1.01666	1.03728	1.35853	1.06717	1.30031	1.15729	1.36518	1.72142	1.13634	1.04486
1.06256	1.03564	1.11989	1.01993	1.03716	1.04623	1.05378	1.00216	1.02529	1.04856		1.10993	1.06048	1.02621	1.13649	1.2121	1.05952	1.24109	1.01306	1.08611	1.00894		1.10771	1.10161	1.10485	1.0098	1.01717	1.05388	1.32096	1.01827	1.03654	1.05785		1.0194	1.05122	1.3586	1.05541	1.30163	1.15389	1.35199	1.74423	1.19981	1.05466
1.0412	1.03303	1.08354	1.02529	1.03602	1.02632	1.03415	1.00497	1.02598	1.08163		1.10868	1.05804	1.0271	1.14082	1.19226	1.05784	1.2391	1.01241	1.08698	1.00779		1.13151	1.08755	1.11445	1.01659	1.0283	1.04487	1.32643	1.02652	1.02618	1.07135		1.0122	1.05342	1.36667	1.05088	1.29691	1.16305	1.35078	1.70264	1.17628	1.07781
1.06083	1.02364	1.09889	1.02158	1.03173	1.0576	1.04279	1.00288	1.02161	1.06422		1.11012	1.05414	1.02528	1.1452	1.20071	1.05944	1.28955	1.01231	1.08687	1.00783		1.15589	1.12244	1.02404	1.01044	1.0396	1.06656	1.26008	1.02164	1.02992	1.06322		1.00122	1.0506	1.40269	1.05434	1.32336	1.15137	1.35719	1.67101	1.13742	1.06348
1.07205	1.02228	1.11413	1.01842	1.03273	1.08248	1.04231	1.00595	1.01979	1.03942		1.11231	1.05276	1.02519	1.14874	1.20077	1.05811	1.3023	1.01244	1.08832	1.00994		1.10709	1.08755	1.1135	1.00993	1.027	1.07488	1.42277	1.04765	1.0256	1.06896		1.0097	1.10523	1.39592	1.04215	1.30488	1.14246	1.35009	1.64749	1.21362	1.07359
1.03514	1.01622	1.09717	1.01329	1.03454	1.04552	1.0475	1.009	1.02312	1.06828		1.11199	1.05435	1.02608	1.14247	1.19003	1.05697	1.33171	1.01468	1.08665	1.00805		1.11106	1.07568	1.07478	1.01647	1.01994	1.05265	1.33683	1.04565	1.02526	1.05914		1.02166	1.05011	1.38175	1.03908	1.33093	1.14295	1.34634	1.62298	1.20963	1.03415
1.04252	1.0082	1.07957	1.00687	1.03861	1.07328	1.0391	1.0058	1.02206	1.08597		1.11355	1.05044	1.02995	1.1421	1.21611	1.05645	1.31477	1.01539	1.08613	1.00754		1.08635	1.10374	1.02986	1.02028	1.02188	1.06571	1.36644	1.03697	1.03666	1.05749		1.00024	1.06912	1.41187	1.03275	1.33288	1.14362	1.34925	1.59146	1.20033	1.06719
1.07452	1.0006	1.11579	1.00672	1.03442	1.08661	1.04102	1.00751	1.01584	1.06495		1.11917	1.05599	1.02692	1.13976	1.20145	1.05787	1.30883	1.01801	1.08414	1.00752		1.12171	1.08664	1.11002	1.01499	1.02148	1.05423	1.40178	1.02172	1.0159	1.06395		1.00636	1.04914	1.38797	1.03511	1.33791	1.13399	1.33457	1.57023	1.1674	1.11253
1.05786	1	1.09135	1.00732	1.03182	1.02034	1.03185	1.00427	1.00701	1.07758		1.11681	1.06055	1.02018	1.13521	1.19808	1.05611	1.27017	1.01757	1.08862	1.0098		1.09543	1.07791	1.09483	1.01872	1.01754	1.04609	1.34011	1.03411	1.03494	1.06622		1.02007	1.08063	1.37035	1.03278	1.31939	1.13254	1.32471	1.51398	1.12143	1.0688
1.02582	1.0007	1.10028	1.00462	1.02141	1.03946	1.02634	1.00351	1.00675	1.03173		1.11105	1.05882	1.03144	1.14634	1.22782	1.05438	1.27388	1.01639	1.08601	1.00734		1.16305	1.07091	1.10027	1.02012	1.02049	1.07456	1.40555	1.00756	1.02804	1.06172		1.00524	1.05741	1.38532	1.02749	1.31809	1.13149	1.33138	1.49466	1.14109	1
1.05681	1.00345	1.10887	1.00877	1.03965	1.0603	1.02574	1.00664	1.00776	1.06546		1.1204	1.05635	1.02485	1.14675	1.19864	1.05063	1.2917	1.0178	1.08691	1.00848		1.14645	1.11242	1.09926	1.01621	1.02443	1.05588	1.33246	1.03203	1.03645	1.05486		1.01021	1.04112	1.38813	1.03621	1.32892	1.14359	1.3182	1.47737	1.20999	1.08879
1.01731	1.00417	1.1277	1.00306	1.03117	1.04749	1.01142	1.00696	1.00626	1.07667		1.11373	1.05632	1.02702	1.14443	1.18627	1.04903	1.28546	1.01747	1.08711	1.00963		1.1408	1.07254	1.08541	1.02279	1.02957	1.05239	1.28688	1.02163	1.03073	1.05654		1.01511	1.03365	1.39018	1.05083	1.31421	1.1428	1.29839	1.4518	1.14939	1.12933
1.01196	1.00287	1.13461	1.01073	1.02994	1.04602	1.02698	1.00867	1.0121	1.09389		1.12186	1.06111	1.03337	1.14905	1.18468	1.05356	1.3148	1.01578	1.08847	1.01103		1.1762	1.08522	1.09596	1.02908	1.0401	1.0518	1.26641	1.00667	1.02452	1.06044		1.01129	1.04708	1.38773	1.06065	1.34723	1.13647	1.32164	1.4773	1.15748	1.1065
1.03131	1.00526	1.1077	1.00369	1.0336	1.05004	1.01648	1.00719	1.01517	1.06806		1.11918	1.0565	1.02736	1.14689	1.17618	1.05343	1.29596	1.01345	1.08699	1.00936		1.20903	1.07619	1.09595	1.04075	1.04475	1.01057	1.22474	1.01894	1.01364	1.05377		1	1.0539	1.35604	1.06108	1.32281	1.12444	1.29694	1.44648	1.14515	1.04665
1.04962	1.00698	1.12409	1.00253	1.02384	1.03618	1.01063	1.01423	1.01443	1.05245		1.12235	1.06047	1.02721	1.15178	1.17463	1.04753	1.33586	1.01359	1.08699	1.00866		1.1624	1.06358	1.08754	1.03879	1.04104	1.03891	1.15558	1.02606	1.0234	1.0622		1.02243	1.03246	1.39338	1.04849	1.32689	1.12537	1.30006	1.43511	1.19649	1.09015
1.02496	1.00989	1.13948	1.00774	1.03547	1.01297	1	1.01174	1.02588	1.09049		1.11645	1.06535	1.0272	1.1456	1.17952	1.05329	1.31011	1.0125	1.08546	1.00931		1.11044	1.07466	1.10404	1.04555	1.02729	1.03937	1.236	1.0116	1.01772	1.07149		1.00102	1.05955	1.34292	1.04401	1.33021	1.11698	1.2985	1.43019	1.23074	1.04929
1.04386	1.01166	1.12842	1.00547	1.03692	1.07034	1.00901	1.00919	1.02864	1.06746		1.12184	1.06516	1.02652	1.1472	1.20983	1.05309	1.27277	1.01274	1.08591	1.00887		1.12376	1.11736	1.1029	1.03865	1.02048	1.02507	1.21933	1.03205	1.02365	1.05966		1.00154	1.06278	1.40077	1.04138	1.34159	1.10405	1.2874	1.42431	1.22759	1.01225
1.04947	1.01117	1.10845	1.00242	1.04266	1.02803	1.00383	1.00915	1.02241	1.08919		1.11592	1.06532	1.02665	1.14727	1.19669	1.05437	1.3063	1.01269	1.08686	1.00868		1.10468	1.06732	1.08653	1.04981	1.02287	1.04242	1.0625	1.03899	1.04421	1.06855		1.01408	1.06749	1.39945	1.03502	1.34394	1.09918	1.29519	1.40343	1.24527	1.0557
1.03537	1.00905	1.09246	1	1.04767	1.03323	1.01245	1.01115	1.02272	1.09837		1.11512	1.07019	1.02716	1.14992	1.18912	1.05562	1.29931	1.00998	1.08701	1.00898		1.11763	1.09932	1.11151	1.0528	1.02296	1.05949	1.11628	1.02831	1.03	1.05241		1.01147	1.1126	1.3865	1.04427	1.33339	1.10188	1.27034	1.37964	1.22626	1.06426
1.03043	1.01035	1.09974	1.00523	1.04658	1.06123	1.01961	1.01078	1.02303	1.07615		1.11428	1.06374	1.02346	1.14511	1.19098	1.05307	1.33076	1.01093	1.08734	1.0076		1.11898	1.05479	1.09695	1.05875	1.01767	1.04102	1.15173	1.01754	1.03166	1.06742		1.02443	1.10667	1.35169	1.06221	1.32518	1.10525	1.27921	1.35681	1.16304	1.07099
1.03615	1.01505	1.09334	1.00916	1.06262	1.0418	1.01828	1.01212	1.02997	1.04603		1.12009	1.06317	1.03061	1.1448	1.19847	1.05337	1.31404	1.01141	1.0852	1.00828		1.10415	1.07849	1.13127	1.06226	1.01463	1.03442	1.11036	1.0261	1.02134	1.0847		1.02214	1.08174	1.32244	1.05857	1.33588	1.0953	1.26747	1.3802	1.23151	1.05951
1.03059	1.0243	1.08491	1.00742	1.06407	1.02042	1.00735	1.01746	1.01577	1.02751		1.12264	1.06481	1.03293	1.14408	1.19344	1.0569	1.29418	1.01114	1.08758	1.00615		1.11834	1.0619	1.10132	1.07874	1.02222	1.02782	1.04807	1.03925	1.0231	1.07145		1.01909	1.07937	1.35692	1.05101	1.33531	1.09683	1.27093	1.34601	1.23325	1.01713
1	1.02806	1.0887	1.00723	1.06507	1.01141	1.01662	1.01336	1.01541	1.05194		1.12577	1.06181	1.02942	1.14225	1.18219	1.05147	1.29523	1.01054	1.08786	1.00685		1.05442	1.06242	1.15519	1.0757	1.03161	1.01725	1.03666	1.04094	1.02099	1.0721		1.01772	1	1.36469	1.04489	1.36191	1.09242	1.27064	1.32104	1.20794	1.04936
1.03979	1.03374	1.10083	1.00389	1.07803	1.04602	1.00018	1.01503	1.01519	1.06759		1.12472	1.05657	1.028	1.14946	1.18921	1.054	1.31635	1.01009	1.08711	1.00576		1.09983	1.05029	1.08147	1.06304	1.02192	1	1.13795	1.05072	1.028	1.06124		1.03167	1.07608	1.38996	1.039	1.34967	1.09351	1.26187	1.35849	1.19472	1.07194
1.02513	1.0331	1.09566	1.00617	1.08468	1.02841	1.00839	1.00772	1.00896	1.08057		1.11514	1.05573	1.0286	1.14668	1.17584	1.05597	1.29833	1.00944	1.08798	1.0071		1.13697	1.06384	1.08864	1.06714	1.02938	1.03426	1.11654	1.02014	1.02193	1.0695		1.01062	1.06389	1.36953	1.04284	1.34471	1.07897	1.24217	1.34734	1.14905	1.03302
1.05771	1.02553	1.1137	1.00123	1.08086	1.0032	1.00501	1.00818	1.01075	1.09602		1.11664	1.06241	1.02757	1.14667	1.20348	1.05704	1.31683	1.00924	1.08752	1.0066		1.17496	1.05912	1.10057	1.07557	1.04555	1.01157	1.00839	1.00456	1.02977	1.06576		1.01298	1.08963	1.36814	1.06988	1.34234	1.08494	1.25164	1.34277	1.1563	1.02694
1.05199	1.02678	1.12358	1.00066	1.06966	1.04429	1.0009	1.00796	1.02142	1.03339		1.11794	1.06151	1.02672	1.15052	1.18931	1.05462	1.29867	1.00799	1.08871	1.00691		1.15989	1.06669	1.08556	1.09914	1.05893	1.0315	1.12202	1.01781	1.03862	1.06988		1.01687	1.07641	1.38126	1.06554	1.33756	1.07488	1.25461	1.36242	1.1124	1.03682
1.06112	1.03101	1.10749	1.00772	1.07548	1.05665	1.02425	1.01022	1.02582	1.09091		1.12113	1.06386	1.02613	1.15368	1.16085	1.05698	1.32744	1.00825	1.08918	1.00715		1.10512	1.06826	1.08175	1.0885	1.06059	1.04412	1.08122	1.04449	1.03905	1.0816		1.01695	1.13016	1.37809	1.05891	1.33608	1.07318	1.22591	1.35567	1.17722	1.0317
1.05476	1.03605	1.09614	1.01206	1.06974	1.0296	1.02024	1.01282	1.02894	1.07105		1.11026	1.063	1.02647	1.15129	1.19396	1.05909	1.3245	1.00918	1.08821	1.00545		1.11359	1.05882	1.07896	1.08907	1.04387	1.01805	1.0937	1.07007	1.03916	1.09354		1.01049	1.04689	1.37287	1.05255	1.32041	1.07367	1.24932	1.35935	1.19303	1.1056
1.01896	1.03699	1.1051	1.01321	1.07346	1.01085	1.0158	1.01569	1.03467	1.01657		1.11842	1.06161	1.02818	1.14846	1.18183	1.05605	1.33157	1.00874	1.08959	1.00649		1.10594	1.03779	1.05567	1.09342	1.03717	1.02258	1.07082	1.05503	1.03987	1.09002		1.01858	1.04363	1.36329	1.04338	1.34844	1.06091	1.24485	1.34844	1.18749	1.03708
1.03536	1.03657	1.09196	1.01582	1.06057	1.03491	1.0229	1.0166	1.03089	1.04504		1.12169	1.06438	1.02943	1.15112	1.18498	1.05638	1.32354	1.00956	1.08934	1.00883		1.14674	1.05132	1.0848	1.09507	1.03129	1.04156	1.11913	1.03561	1.05148	1.08109		1.01233	1.01199	1.38425	1.05158	1.36471	1.05647	1.22308	1.34518	1.162	1.03439
1.06451	1.03786	1.10615	1.02113	1.06936	1.03917	1.00825	1.01668	1.02955	1.07644		1.11447	1.06398	1.02472	1.15	1.17116	1.05362	1.35045	1.00923	1.08823	1.00717		1.13779	1.04851	1.07413	1.09854	1.04085	1.02104	1.06711	1.04136	1.05868	1.08617		1.01046	1.05634	1.39939	1.05003	1.35623	1.05153	1.23834	1.34186	1.19258	1.06954
1.06349	1.03682	1.13105	1.01339	1.07459	1	1.01031	1.01651	1.03168	1.01518		1.11133	1.06135	1.02455	1.15897	1.18791	1.05629	1.35552	1.00758	1.09001	1.00736		1.1205	1.02585	1.07579	1.10049	1.03058	1.02581	1.04058	1.06864	1.03485	1.07311		1.02638	1.02995	1.42433	1.04551	1.33783	1.04815	1.23976	1.35048	1.1911	1.00793
1.0527	1.03341	1.09353	1.01233	1.07051	1.04818	1.01164	1.01633	1.03461	1.00429		1.11915	1.05958	1.02196	1.1518	1.17322	1.05015	1.36082	1.00799	1.09085	1.00774		1.14529	1.05931	1.08787	1.09333	1.03652	1.04244	1.02154	1.02842	1.02753	1.08955		1.01355	1.03814	1.42912	1.05348	1.36586	1.03645	1.2364	1.31576	1.17916	1.07076
1.00778	1.03419	1.1002	1.01671	1.06477	1.03838	1.01902	1.01279	1.03561	1.04391		1.1099	1.05834	1.02515	1.15465	1.20141	1.0485	1.34517	1.00818	1.09011	1.00876		1.09689	1.02528	1.08568	1.09625	1.02959	1.05069	1.09701	1.0345	1.04821	1.08659		1.02872	1.04134	1.43646	1.04646	1.38472	1.03798	1.23082	1.34468	1.22222	1.03076
1.04966	1.03358	1.07581	1.01597	1.06061	1.05716	1.01948	1.0154	1.03553	1.05564		1.11746	1.06282	1.02628	1.15468	1.18842	1.04878	1.34358	1.00653	1.08842	1.00928		1.04643	1.05104	1.08099	1.10898	1.0318	1.03107	1.06488	1.04258	1.05849	1.08911		1.0371	1.09299	1.42137	1.05049	1.36448	1.03963	1.25135	1.36453	1.28205	1.0529
1.04301	1.03611	1.11856	1.01845	1.05816	1.0398	1.015	1.01484	1.03455	1.04928		1.12428	1.06607	1.03072	1.15969	1.20523	1.05131	1.3001	1.00683	1.08852	1.00692		1.08417	1.04649	1.06968	1.11016	1.03179	1.01696	1.08974	1.03917	1.06213	1.0854		1.0127	1.06349	1.41936	1.04868	1.35494	1.03438	1.22976	1.35286	1.25636	1.03454
1.03846	1.03496	1.11318	1.01755	1.05788	1.00048	1.02322	1.0172	1.03277	1.07635		1.11606	1.06392	1.02573	1.15803	1.20197	1.04916	1.31376	1.0067	1.08876	1.00774		1.14713	1.08418	1	1.12034	1.0631	1.0291	1.0768	1.07097	1.05085	1.09645		1.01693	1.03964	1.42535	1.05018	1.35639	1.03487	1.24118	1.32296	1.26815	1.06308
1.01233	1.04211	1.09018	1.0206	1.06675	1.05733	1.01803	1.01962	1.02964	1.04558		1.11533	1.06767	1.03042	1.16404	1.18764	1.04997	1.3234	1.00618	1.08865	1.00701		1.07762	1.02542	1.08658	1.12225	1.06306	1.01855	1.03846	1.04578	1.02623	1.07408		1.05263	1.02943	1.4049	1.06055	1.37267	1.03551	1.22609	1.35275	1.15144	1.04942
1.05545	1.04108	1.09586	1.02517	1.06941	1.04377	1.02796	1.01908	1.03092	1.09001		1.12125	1.06814	1.02751	1.1588	1.2011	1.04668	1.34778	1.00635	1.08915	1.00908		1.07725	1.03968	1.07894	1.11549	1.06364	1.04487	1.09929	1.03496	1.04285	1.08337		1.04101	1.04836	1.40786	1.05801	1.36737	1.03395	1.23855	1.36358	1.12051	1.06504
1.01765	1.04363	1.07643	1.02615	1.08952	1.03501	1.02172	1.02008	1.02931	1.05987		1.1208	1.06574	1.0303	1.16688	1.19533	1.04269	1.31906	1.00639	1.08976	1.00712		1.05507	1.05841	1.07598	1.11562	1.05053	1.02703	1.07317	1.03931	1.04969	1.07884		1.03305	1.07603	1.42188	1.05819	1.38998	1.04097	1.25304	1.36961	1.22332	1.05091
1.03972	1.04347	1.07786	1.03008	1.06852	1.05086	1.03599	1.02212	1.03399	1.07778		1.11355	1.06004	1.02264	1.16503	1.1791	1.04214	1.33287	1.00567	1.08931	1.0069		1.08361	1.02637	1.07734	1.13169	1.04929	1.03675	1.07187	1.05927	1.04882	1.09366		1.03737	1.03248	1.39513	1.05435	1.37675	1.03928	1.23406	1.35817	1.24837	1.02287
1.01136	1.05016	1.0601	1.02509	1.06547	1.04875	1.03818	1.0232	1.04006	1.08609		1.11428	1.05887	1.02199	1.16677	1.18793	1.0419	1.32625	1.00611	1.08996	1.0064		1	1.02754	1.06703	1.11238	1.03665	1.03794	1.08139	1.06747	1.04662	1.08542		1.0448	1.02575	1.41846	1.06298	1.38937	1.04279	1.25404	1.34854	1.24391	1.04651
1.06409	1.05147	1.09299	1.02841	1.07219	1.08547	1.02801	1.02377	1.03318	1.02091		1.11846	1.05863	1.02132	1.15747	1.17626	1.04396	1.38219	1.00643	1.09025	1.0072		1.04601	1.01143	1.06448	1.11995	1.03973	1.05434	1.08203	1.07886	1.05404	1.0811		1.0239	1.03916	1.41793	1.07547	1.38626	1.03527	1.23048	1.37555	1.22576	1.0106
1.02156	1.05508	1.09908	1.03758	1.07052	1.06542	1.03728	1.02949	1.04867	1.08569		1.11343	1.05682	1.02761	1.16558	1.19047	1.04628	1.31774	1.0061	1.08932	1.00653		1.08214	1.05202	1.06855	1.12204	1.03964	1.04198	1.15658	1.07359	1.05593	1.08837		1.0387	1.03479	1.42138	1.07274	1.39045	1.02858	1.24787	1.35378	1.31019	1.04278
1.04617	1.0658	1.10397	1.03187	1.07699	1.03602	1.0358	1.0289	1.051	1.07138		1.11317	1.0615	1.02616	1.16773	1.17383	1.04174	1.35464	1.00587	1.08891	1.00741		1.10788	1.04164	1.0785	1.11775	1.04926	1.02266	1.10113	1.06541	1.05616	1.08481		1.04304	1.03362	1.4098	1.07605	1.3737	1.02649	1.22933	1.3631	1.21983	1.02323
1.05309	1.07503	1.10889	1.03699	1.0824	1.07755	1.04084	1.03386	1.04747	1.03324		1.11193	1.06767	1.02908	1.17027	1.18732	1.04631	1.32335	1.00611	1.08878	1.00513		1.07867	1.03164	1.07059	1.11716	1.05481	1.03209	1.10075	1.05575	1.05354	1.08469		1.0322	1.03483	1.39001	1.06831	1.39534	1.01647	1.27561	1.37075	1.27778	1.0624
1.02479	1.0855	1.07902	1.03379	1.06769	1.04805	1.0402	1.03197	1.05762	1.07999		1.11648	1.06677	1.02766	1.16625	1.193	1.04236	1.3251	1.00699	1.08974	1.00569		1.02574	1.01164	1.06567	1.13147	1.08487	1.02821	1.097	1.0664	1.08571	1.09822		1.04613	1.01697	1.38869	1.07313	1.39493	1.02015	1.25396	1.36538	1.21784	1.09023
1.03757	1.09143	1.08747	1.04147	1.09657	1.03446	1.04402	1.03272	1.0527	1.06074		1.11547	1.06523	1.02695	1.16699	1.18926	1.04255	1.3798	1.00542	1.08949	1.00695		1.02555	1.01004	1.08633	1.14187	1.10112	1.02604	1.09274	1.06441	1.06742	1.08986		1.04746	1.03109	1.3852	1.07431	1.40617	1.02442	1.25339	1.36212	1.26967	1.0846
1.06333	1.08729	1.10066	1.04242	1.09201	1.06933	1.04693	1.03424	1.05753	1.12757		1.11638	1.06188	1.02801	1.16469	1.16786	1.0397	1.3014	1.00467	1.08821	1.00634		1.06602	1	1.04792	1.12513	1.08657	1.04804	1.16147	1.07734	1.07573	1.10779		1.04133	1.04037	1.40251	1.07283	1.40579	1.03525	1.24781	1.35304	1.17361	1.12089
1.04403	1.08585	1.1073	1.0468	1.08257	1.03625	1.03767	1.03856	1.05999	1.10951		1.11386	1.06142	1.02832	1.16935	1.19673	1.04417	1.38636	1.00411	1.0904	1.00691		1.09283	1.06197	1.07541	1.13438	1.07236	1.05781	1.05323	1.05279	1.07635	1.1094		1.06514	1.04144	1.41198	1.07534	1.38403	1.03262	1.2538	1.3362	1.27555	1.09118
1.02028	1.09325	1.09172	1.04953	1.09409	1.04562	1.03273	1.03844	1.06444	1.115		1.10078	1.06077	1.02955	1.16878	1.18967	1.0456	1.38516	1.00373	1.08894	1.00591		1.04031	1.07601	1.07266	1.13034	1.06318	1.0212	1.1235	1.06866	1.09158	1.10615		1.04859	1.04809	1.4132	1.07362	1.41424	1.03345	1.256	1.31104	1.2916	1.07105
1.0279	1.09667	1.08843	1.05086	1.10103	1.0307	1.04166	1.03934	1.0709	1.03002		1.11666	1.0607	1.02947	1.16849	1.20798	1.04066	1.36575	1.00296	1.08843	1.00612		1.07246	1.03318	1.08701	1.12968	1.07901	1.04682	1.0105	1.08205	1.0748	1.09567		1.06368	1.06349	1.43808	1.07515	1.3854	1.03123	1.27864	1.32489	1.21824	1.06536
1.03394	1.09302	1.05308	1.04943	1.09103	1.05282	1.04516	1.03982	1.06828	1.08257		1.10264	1.05956	1.025	1.17196	1.21673	1.04017	1.3434	1.00276	1.08679	1.00614		1.11828	1.04425	1.07906	1.13651	1.07425	1.04327	1.07332	1.10104	1.08473	1.10299		1.072	1.07866	1.4465	1.06762	1.38927	1.03007	1.2741	1.3364	1.26841	1.05177
1.04344	1.08747	1.08694	1.05874	1.09581	1.07247	1.0474	1.0432	1.07077	1.07329		1.10547	1.0675	1.03077	1.1666	1.19258	1.04273	1.331	1.00305	1.09023	1.00503		1.12279	1.08882	1.0523	1.14197	1.07869	1.04511	1.08361	1.06978	1.09482	1.09487		1.06649	1.0269	1.43905	1.07257	1.38847	1.03424	1.26945	1.35308	1.24138	1.06112
1.05153	1.09343	1.05891	1.06081	1.08817	1.07781	1.04005	1.04832	1.07806	1.05835		1.10995	1.06612	1.02398	1.16732	1.19089	1.04598	1.32321	1.00285	1.0881	1.00524		1.09953	1.04574	1.07246	1.14261	1.068	1.04945	1.08604	1.06246	1.07627	1.10138		1.07269	1.10035	1.47842	1.07766	1.39107	1.03003	1.27268	1.32788	1.22768	1.09916
1.04202	1.0918	1.07203	1.06522	1.08802	1.08898	1.058	1.04939	1.08401	1.09841		1.1095	1.06081	1.02937	1.17392	1.17368	1.04689	1.33777	1.00385	1.09071	1.0041		1.06076	1.0712	1.01913	1.14108	1.06509	1.05171	1.11587	1.09942	1.09241	1.10598		1.07843	1.10118	1.42669	1.07927	1.39119	1.02929	1.28378	1.31559	1.21657	1.06337
1.04713	1.09389	1.0821	1.07245	1.09268	1.10199	1.05619	1.05291	1.09507	1.07338		1.11433	1.06093	1.0309	1.16487	1.2023	1.04375	1.30077	1.00295	1.09018	1.00575		1.13587	1.0432	1.08216	1.14349	1.08609	1.05537	1.05253	1.08339	1.08668	1.11573		1.0815	1.10217	1.46715	1.07767	1.38604	1.03462	1.28143	1.29946	1.23165	1.05806
1.08857	1.1024	1.08788	1.06696	1.09926	1.12819	1.04398	1.05676	1.0857	1.07539		1.10764	1.06295	1.02718	1.17181	1.19632	1.04732	1.36752	1.00257	1.09073	1.00612		1.12945	1.04864	1.0837	1.14299	1.07032	1.06197	1.15547	1.0872	1.07976	1.09526		1.07273	1.03359	1.45978	1.08275	1.38827	1.03677	1.29407	1.32326	1.23578	1.07412
1.07245	1.11118	1.10394	1.07312	1.09499	1.08867	1.06893	1.06025	1.09028	1.0906		1.11442	1.05923	1.02664	1.17102	1.20699	1.04752	1.37195	1.00307	1.08943	1.00436		1.16731	1.03941	1.07663	1.13119	1.0677	1.0724	1.01387	1.09551	1.10306	1.1073		1.0938	1.03092	1.47163	1.08604	1.4142	1.04344	1.30219	1.3122	1.30608	1.04811
1.04795	1.10905	1.11247	1.08034	1.09282	1.13795	1.07017	1.0562	1.09412	1.11147		1.12332	1.05861	1.02444	1.17395	1.17887	1.04845	1.31633	1.00344	1.09033	1.00531		1.10509	1.05256	1.07032	1.14847	1.06964	1.02256	1.06211	1.1225	1.10198	1.12169		1.08051	1.02213	1.50991	1.08889	1.3915	1.05043	1.296	1.31959	1.25441	1.02061
1.06524	1.11357	1.12	1.07639	1.0913	1.15272	1.0823	1.0603	1.08769	1.1092		1.10892	1.05999	1.02616	1.16721	1.16941	1.04857	1.35084	1.0039	1.08945	1.00606		1.10804	1.05173	1.09786	1.15955	1.084	1.03473	1.10454	1.08734	1.08626	1.12028		1.08721	1.10595	1.52173	1.09269	1.37407	1.05472	1.29031	1.31411	1.19298	1.03747
1.07783	1.11855	1.10837	1.07919	1.10322	1.11706	1.06522	1.06291	1.09274	1.08187		1.10835	1.05798	1.02639	1.16902	1.17948	1.05563	1.32595	1.00263	1.09038	1.00467		1.08166	1.05301	1.07345	1.14723	1.10244	1.07244	1.05736	1.10569	1.09898	1.11813		1.09036	1.06272	1.50329	1.10195	1.40133	1.06007	1.29416	1.33429	1.31595	1.04009
1.05747	1.12845	1.10151	1.08919	1.11297	1.16186	1.07744	1.07391	1.09527	1.11297		1.11382	1.05687	1.026	1.17369	1.19867	1.05913	1.32051	1.002	1.08962	1.00343		1.05615	1.04255	1.0834	1.15221	1.09183	1.07563	1.02477	1.12757	1.09183	1.12457		1.09578	1.05466	1.51137	1.10817	1.39881	1.05705	1.30969	1.32662	1.27536	1.08514
1.07562	1.12705	1.09468	1.08887	1.104	1.1321	1.08396	1.0756	1.10187	1.12362		1.12311	1.05771	1.02842	1.16884	1.1795	1.06106	1.36443	1.00249	1.08876	1.00433		1.16182	1.06875	1.0569	1.14177	1.08558	1.03537	1.13061	1.10545	1.10842	1.12608		1.09096	1.04866	1.53058	1.10645	1.381	1.04714	1.31723	1.33872	1.2326	1.06815
1.07408	1.13215	1.10105	1.09316	1.11501	1.15208	1.09682	1.08079	1.10167	1.12855		1.11062	1.05323	1.02674	1.17251	1.20562	1.05738	1.37462	1.0017	1.08986	1.00595		1.09161	1.05241	1.0917	1.1441	1.10524	1.05802	1.09221	1.12416	1.10843	1.12867		1.09905	1.04316	1.52011	1.10727	1.39864	1.06214	1.31324	1.35566	1.30341	1.0546
1.08282	1.13523	1.10146	1.10074	1.10535	1.13218	1.08444	1.09082	1.09818	1.14567		1.11721	1.05292	1.0246	1.16493	1.19297	1.06054	1.35732	1.00275	1.0855	1.00599		1.15292	1.05756	1.08018	1.13828	1.101	1.04372	1.07848	1.11093	1.11063	1.13258		1.10773	1.06276	1.50206	1.10764	1.40874	1.06184	1.3079	1.34643	1.41602	1.13635
1.09139	1.13973	1.11486	1.1016	1.11341	1.14608	1.08997	1.09175	1.10427	1.13225		1.11126	1.05931	1.02784	1.15562	1.19744	1.05782	1.3643	1.00259	1.08631	1.00621		1.12106	1.05412	1.09713	1.13939	1.11219	1.07477	1.08482	1.10319	1.11011	1.13449		1.09422	1.06047	1.52402	1.11926	1.39411	1.0768	1.30818	1.35842	1.39305	1.07278
1.07218	1.14781	1.11867	1.10904	1.11077	1.14474	1.08458	1.08638	1.1135	1.09674		1.11505	1.05912	1.02617	1.15584	1.19738	1.05827	1.38349	1.0011	1.08604	1.00633		1.16399	1.0662	1.08099	1.1341	1.11531	1.07394	1.1494	1.11947	1.09735	1.13579		1.11906	1.05967	1.56205	1.12068	1.39312	1.0797	1.30133	1.33861	1.3602	1.08267
1.09617	1.15707	1.13668	1.10868	1.11082	1.13382	1.09731	1.08804	1.11319	1.10624		1.11199	1.06538	1.02622	1.15674	1.20366	1.05237	1.38547	1.00153	1.08683	1.00603		1.15441	1.08322	1.08752	1.13696	1.10948	1.08864	1.10218	1.1275	1.11726	1.12941		1.10304	1.05977	1.55978	1.12195	1.40094	1.07713	1.3215	1.34372	1.25744	1.15227
1.12112	1.15577	1.14874	1.11215	1.11525	1.10741	1.10029	1.09028	1.11492	1.1403		1.10808	1.06554	1.02551	1.15607	1.20219	1.05606	1.37013	1.00204	1.08552	1.00477		1.20046	1.0384	1.1048	1.1268	1.09961	1.0853	1.11692	1.10298	1.12959	1.13612		1.09436	1.04989	1.59916	1.11947	1.40043	1.07359	1.32175	1.3124	1.27892	1.08795
1.11653	1.15629	1.14903	1.1149	1.12433	1.11398	1.11333	1.09884	1.11756	1.09357		1.10949	1.06203	1.02995	1.15454	1.19899	1.05563	1.35053	1.00354	1.08472	1.0048		1.21333	1.07238	1.08423	1.12934	1.09251	1.11172	1.12009	1.10952	1.11247	1.1343		1.11129	1.05327	1.60135	1.12668	1.40238	1.07272	1.32163	1.33261	1.27684	1.138
1.11487	1.15437	1.16316	1.12192	1.1282	1.1601	1.09548	1.10265	1.11886	1.13631		1.11581	1.05949	1.02387	1.15372	1.19633	1.05158	1.3492	1.00179	1.08479	1.00505		1.21556	1.10133	1.10229	1.12871	1.10069	1.09552	1.07122	1.112	1.11881	1.15707		1.11567	1.08128	1.58454	1.12911	1.39964	1.09164	1.31903	1.33956	1.26023	1.08462
1.11659	1.15283	1.14479	1.12722	1.12985	1.12021	1.11002	1.10479	1.11966	1.10384		1.11087	1.0603	1.02575	1.15895	1.18713	1.04981	1.35936	1.00083	1.08442	1.00517		1.18991	1.06551	1.12085	1.13542	1.09882	1.11391	1.10423	1.11871	1.11164	1.14614		1.11523	1.069	1.5585	1.14286	1.38231	1.10285	1.32744	1.34698	1.31558	1.08986
1.09174	1.15654	1.13882	1.13468	1.13687	1.1504	1.12653	1.11553	1.1315	1.12663		1.11269	1.05383	1.02621	1.15881	1.18293	1.05142	1.38123	1.00158	1.08213	1.00446		1.16641	1.05876	1.11414	1.1272	1.1033	1.09857	1.10968	1.13031	1.12948	1.14261		1.13043	1.10359	1.58717	1.13655	1.39789	1.10372	1.34283	1.34253	1.41063	1.11424
1.12368	1.16563	1.11808	1.13913	1.13785	1.07343	1.12217	1.11844	1.13812	1.12056		1.09819	1.05477	1.02803	1.14796	1.18891	1.0565	1.38857	1.00167	1.08205	1.00633		1.13448	1.12743	1.10359	1.13078	1.10654	1.1052	1.09095	1.11498	1.12889	1.15563		1.13165	1.08642	1.61896	1.14363	1.40713	1.11242	1.33001	1.36456	1.37023	1.10829
1.14048	1.17499	1.13606	1.14273	1.1288	1.1516	1.13029	1.12382	1.14027	1.14688		1.10281	1.06004	1.02699	1.14977	1.2107	1.05198	1.43648	1.00085	1.08431	1.0057		1.10132	1.10498	1.12579	1.12848	1.10402	1.11541	1.10441	1.14285	1.13574	1.15847		1.13576	1.09179	1.56914	1.14502	1.39623	1.11959	1.32316	1.34528	1.33213	1.14267
1.11945	1.17465	1.16296	1.14619	1.13347	1.11059	1.14203	1.13319	1.14613	1.1241		1.10879	1.06139	1.02634	1.14953	1.19417	1.0513	1.36054	1.00242	1.08543	1.00588		1.15495	1.0645	1.12896	1.11706	1.10612	1.12363	1.04601	1.14664	1.14009	1.16379		1.15873	1.07103	1.62211	1.15673	1.41778	1.12158	1.34032	1.37023	1.3901	1.13705
1.10929	1.18391	1.15253	1.15313	1.14283	1.18028	1.14689	1.13976	1.14459	1.17843		1.10833	1.06122	1.03024	1.1485	1.18777	1.04877	1.35785	1.00202	1.08644	1.00492		1.13163	1.11251	1.13916	1.1174	1.12115	1.10464	1.15278	1.12383	1.12344	1.1555		1.14471	1.07142	1.61066	1.17126	1.39739	1.12305	1.33213	1.36343	1.34948	1.10138
1.12131	1.18554	1.14735	1.15554	1.15176	1.08345	1.15169	1.14276	1.16007	1.13414		1.10268	1.06444	1.02602	1.14976	1.19129	1.05033	1.33346	1.00365	1.08544	1.00621		1.14448	1.09662	1.14359	1.13283	1.12604	1.13132	1.06489	1.15519	1.15165	1.16526		1.14367	1.09447	1.59158	1.16629	1.39633	1.12353	1.3575	1.363	1.40903	1.09416
1.13798	1.18151	1.16991	1.16112	1.16232	1.15637	1.14202	1.14295	1.15762	1.11951		1.11104	1.06117	1.02593	1.14871	1.19593	1.0496	1.31409	1.00245	1.08633	1.00409		1.13593	1.10269	1.13356	1.13171	1.12531	1.16505	1.1388	1.17757	1.12832	1.17693		1.16037	1.09903	1.63715	1.16481	1.39933	1.14027	1.35557	1.37665	1.40275	1.13807
1.15778	1.18104	1.1562	1.16939	1.16021	1.17606	1.18318	1.15219	1.16746	1.13495		1.11049	1.06502	1.0298	1.14548	1.18117	1.04549	1.33467	1.0037	1.08665	1.00495		1.14892	1.14265	1.14625	1.13383	1.11886	1.13647	1.18784	1.17356	1.16006	1.17489		1.15801	1.11623	1.66518	1.16682	1.41798	1.13517	1.36284	1.35469	1.38615	1.10937
1.13388	1.18139	1.1661	1.17366	1.16235	1.18949	1.17829	1.15687	1.17406	1.10601		1.10134	1.06024	1.02304	1.14766	1.20823	1.04478	1.33716	1.00192	1.0893	1.0054		1.12044	1.14752	1.14404	1.12187	1.12517	1.13914	1.14203	1.15393	1.14826	1.18		1.15107	1.12822	1.67005	1.16522	1.39686	1.12989	1.35915	1.38833	1.39036	1.12451
1.19191	1.18025	1.16823	1.17484	1.17732	1.14843	1.17571	1.16338	1.17592	1.13982		1.10684	1.05958	1.02358	1.15427	1.20047	1.04344	1.35998	1.00106	1.08837	1.00463		1.1313	1.16129	1.17886	1.12588	1.12915	1.1565	1.11385	1.15296	1.15197	1.18103		1.17651	1.14469	1.64694	1.17531	1.39534	1.13484	1.36198	1.36968	1.51258	1.21592
1.16753	1.18225	1.18363	1.18118	1.18154	1.18669	1.1705	1.16969	1.17848	1.16924		1.10678	1.06234	1.02447	1.14793	1.18858	1.04668	1.37254	1.00253	1.08618	1.00427		1.16692	1.17255	1.15946	1.13014	1.13775	1.1519	1.07136	1.15421	1.14753	1.19835		1.1626	1.15708	1.67561	1.17846	1.40722	1.15027	1.38404	1.37381	1.5107	1.15182
1.18435	1.18375	1.18432	1.1857	1.17581	1.15915	1.18697	1.17589	1.18763	1.13658		1.09691	1.05903	1.02724	1.15041	1.18235	1.04534	1.38844	1.0017	1.08561	1.00461		1.15875	1.14211	1.14305	1.13232	1.1343	1.17146	1.06791	1.17471	1.1574	1.18794		1.15768	1.18609	1.66188	1.17784	1.40335	1.15729	1.3903	1.37868	1.3867	1.18685
1.15421	1.18216	1.18109	1.19061	1.17962	1.15822	1.18909	1.1864	1.19298	1.19913		1.10677	1.06065	1.02897	1.15767	1.20595	1.04503	1.37343	1.00294	1.0856	1.00432		1.12629	1.17861	1.19873	1.13621	1.13322	1.17385	1.17832	1.17505	1.17392	1.19699		1.17	1.20158	1.69825	1.17914	1.40977	1.14873	1.38912	1.36816	1.38824	1.24025
1.21883	1.19359	1.1436	1.19655	1.1925	1.16745	1.19016	1.19313	1.19612	1.17432		1.10415	1.05999	1.02769	1.14981	1.1636	1.04907	1.34937	1.00015	1.08384	1.00461		1.14934	1.13772	1.18958	1.15053	1.14083	1.18556	1.04704	1.16494	1.15841	1.20304		1.18526	1.17934	1.65536	1.17386	1.42114	1.1739	1.41394	1.39796	1.44985	1.20288
1.17635	1.19578	1.18871	1.19548	1.19505	1.1934	1.19691	1.19675	1.19201	1.16847		1.09697	1.06139	1.02975	1.15408	1.16772	1.04612	1.3991	1.00218	1.0839	1.00558		1.16277	1.16634	1.19508	1.17969	1.18839	1.19836	1.09309	1.16926	1.1595	1.19928		1.19213	1.2304	1.69432	1.19275	1.3998	1.17054	1.3956	1.38194	1.50512	1.19674
1.22985	1.20624	1.21362	1.20529	1.2159	1.20309	1.20715	1.20546	1.20485	1.21005		1.10996	1.06089	1.02722	1.15283	1.20313	1.04601	1.40739	1.00354	1.08363	1.00539		1.21681	1.20732	1.21603	1.20362	1.20212	1.22667	1.21682	1.21573	1.20644	1.21728		1.20447	1.22506	1.70053	1.22205	1.4027	1.20351	1.42623	1.40241	1.52267	1.22309
1.22625	1.22194	1.23085	1.20923	1.20761	1.17665	1.22093	1.21109	1.21142	1.13038		1.11126	1.05831	1.02455	1.1505	1.20734	1.04528	1.41685	1.00429	1.08389	1.00623		1.16285	1.23332	1.20118	1.22691	1.19464	1.23981	1.25202	1.20353	1.23121	1.21256		1.20411	1.24591	1.66687	1.22462	1.40513	1.21164	1.41813	1.40859	1.50135	1.24417
1.20281	1.22395	1.21764	1.21843	1.23211	1.18425	1.22814	1.22249	1.22389	1.15447		1.10476	1.06126	1.02425	1.14989	1.16793	1.04941	1.36065	1	1.08521	1.00566		1.14739	1.19845	1.20017	1.23539	1.20768	1.22831	1.17349	1.20956	1.2595	1.22185		1.20186	1.30521	1.72185	1.22123	1.41869	1.21378	1.41833	1.4258	1.46587	1.29326
1.2182	1.22042	1.24945	1.2145	1.22919	1.20698	1.22765	1.22712	1.22463	1.24196		1.0925	1.06444	1.02518	1.15691	1.18143	1.04882	1.38867	1.00425	1.08629	1.00434		1.15884	1.24015	1.23945	1.23465	1.20458	1.26565	1.26621	1.18526	1.23661	1.23376		1.22057	1.30487	1.72326	1.22469	1.40569	1.24666	1.40523	1.45621	1.57076	1.23436
1.20304	1.2164	1.24611	1.22323	1.24061	1.18792	1.24208	1.23934	1.22374	1.20607		1.10018	1.06088	1.02537	1.15191	1.17351	1.04649	1.38335	1.00156	1.08646	1.00371		1.20274	1.25346	1.2429	1.24555	1.19276	1.26774	1.21851	1.19076	1.21212	1.23744		1.23047	1.26525	1.72262	1.22842	1.40814	1.2691	1.45353	1.435	1.52767	1.22729
1.2202	1.21753	1.2828	1.22845	1.25345	1.22435	1.26021	1.24993	1.23426	1.20087		1.10277	1.06383	1.02969	1.14859	1.19449	1.04703	1.41704	1.00134	1.0871	1.00427		1.21905	1.27964	1.26704	1.25047	1.19451	1.29386	1.278	1.20876	1.20922	1.22419		1.20754	1.37176	1.70987	1.23664	1.43868	1.26149	1.44447	1.42645	1.54658	1.32573
1.24084	1.22937	1.28099	1.23376	1.24959	1.21697	1.26434	1.25788	1.24274	1.28114		1.0992	1.06302	1.02659	1.14748	1.19433	1.05009	1.37948	1.00634	1.08639	1.00386		1.24559	1.26383	1.28586	1.25734	1.18461	1.27041	1.31682	1.22861	1.22588	1.23717		1.25269	1.38662	1.70305	1.24365	1.41238	1.26178	1.45276	1.46882	1.55936	1.28533
1.22442	1.23107	1.34561	1.23085	1.2744	1.2142	1.30347	1.2722	1.24416	1.19329		1.09675	1.06422	1.02571	1.15149	1.20982	1.04429	1.39383	1.00151	1.08682	1.00315		1.27448	1.23753	1.26007	1.27285	1.19872	1.28122	1.33896	1.23854	1.22345	1.23793		1.22693	1.41495	1.69843	1.24741	1.42918	1.27192	1.45994	1.44332	1.63751	1.31371
1.22127	1.22383	1.35664	1.24391	1.26259	1.29452	1.27208	1.27977	1.24363	1.1963		1.10392	1.06873	1.02503	1.14851	1.19238	1.04299	1.41165	1.00057	1.08779	1.00526		1.26564	1.33632	1.30839	1.29043	1.20669	1.32033	1.42108	1.25089	1.2195	1.2377		1.22175	1.40031	1.71626	1.2527	1.42046	1.28608	1.45738	1.4642	1.56153	1.26382
1.28765	1.23243	1.39518	1.25562	1.27559	1.22404	1.30115	1.29384	1.25431	1.2018		1.09153	1.07034	1.02675	1.15227	1.18689	1.04057	1.37424	1.00446	1.08731	1.00447		1.28108	1.30768	1.34033	1.31764	1.20115	1.35604	1.42424	1.21067	1.20177	1.2321		1.23507	1.45317	1.72518	1.27773	1.41978	1.29278	1.4408	1.44122	1.54922	1.31809
1.29896	1.23523	1.40136	1.25187	1.29026	1.2228	1.30842	1.30486	1.24957	1.23935		1.09158	1.06831	1.02704	1.14557	1.17854	1.04227	1.37941	1.00293	1.09069	1.00397		1.34962	1.35431	1.32564	1.33936	1.20628	1.3572	1.41251	1.25343	1.21564	1.23334		1.24835	1.49712	1.68312	1.29448	1.42814	1.29475	1.4494	1.44071	1.62852	1.30974
1.31855	1.22377	1.39351	1.25811	1.27625	1.19743	1.32534	1.31029	1.2578	1.257		1.09709	1.06893	1.02335	1.14854	1.16906	1.04139	1.37769	1.00243	1.08976	1.00362		1.36387	1.369	1.35343	1.35073	1.21244	1.403	1.53624	1.22183	1.21195	1.24334		1.23541	1.50613	1.73456	1.29205	1.40111	1.30577	1.46319	1.46518	1.74827	1.32722
1.27953	1.24506	1.38772	1.26817	1.30488	1.25369	1.33711	1.32054	1.26619	1.27736		1.10206	1.0656	1.0299	1.14449	1.16594	1.0442	1.37579	1.00243	1.09178	1.0028		1.3762	1.37951	1.3602	1.35442	1.21513	1.39409	1.50231	1.26685	1.25339	1.25532		1.25511	1.55712	1.7492	1.28924	1.43731	1.33979	1.46626	1.45325	1.74485	1.30557
1.32689	1.24452	1.38619	1.26682	1.31195	1.31427	1.35488	1.33673	1.27661	1.26031		1.10627	1.06393	1.0252	1.14793	1.17886	1.04294	1.42358	1.00402	1.09071	1.0019		1.27414	1.39378	1.39564	1.35991	1.22057	1.44271	1.54473	1.24296	1.25722	1.23915		1.27264	1.60517	1.75079	1.29528	1.43304	1.36343	1.45957	1.45062	1.74499	1.35383
1.33743	1.2418	1.39807	1.27389	1.3051	1.29328	1.35862	1.34577	1.28642	1.30659		1.1001	1.0654	1.02351	1.14817	1.20407	1.03801	1.407	1.00523	1.09116	1.0063		1.34899	1.40485	1.41263	1.37656	1.21792	1.44909	1.5114	1.22971	1.26117	1.26297		1.26439	1.55006	1.73776	1.29438	1.43815	1.39926	1.47164	1.48252	1.71323	1.34598
1.31294	1.24663	1.40288	1.28313	1.31804	1.28123	1.37315	1.3584	1.29209	1.2417		1.09724	1.06365	1.02343	1.1491	1.20451	1.03344	1.39637	1.00252	1.09075	1.00464		1.28985	1.38322	1.43066	1.38236	1.22562	1.453	1.51969	1.25043	1.22436	1.25442		1.26814	1.62872	1.73156	1.31516	1.45108	1.41546	1.48644	1.49522	1.81638	1.29875
1.34765	1.24923	1.42957	1.29156	1.3251	1.32815	1.39829	1.36747	1.29644	1.22207		1.08858	1.05985	1.03003	1.14832	1.20046	1.03995	1.37863	1.00504	1.09297	1.0052		1.29261	1.44665	1.43996	1.38503	1.23266	1.50729	1.58688	1.2376	1.24963	1.27954		1.285	1.63452	1.71493	1.32149	1.43448	1.42968	1.49531	1.47915	1.78852	1.40117
1.36002	1.25272	1.44655	1.29421	1.33068	1.28627	1.39299	1.38084	1.30562	1.25404		1.08273	1.0682	1.02758	1.14682	1.19193	1.0378	1.38473	1.00472	1.0937	1.00546		1.40773	1.4365	1.43917	1.38308	1.25388	1.53212	1.61647	1.26337	1.26452	1.27974		1.2742	1.7171	1.77594	1.31961	1.42849	1.43472	1.48115	1.49772	1.88448	1.31991
1.36906	1.25049	1.46476	1.29006	1.34389	1.32833	1.42013	1.39037	1.30971	1.33849		1.09405	1.0722	1.02425	1.14346	1.19968	1.04025	1.37823	1.00384	1.09303	1.00671		1.33481	1.49915	1.49247	1.39003	1.24695	1.53584	1.61931	1.25259	1.267	1.29468		1.28551	1.72544	1.74803	1.33204	1.43555	1.45463	1.47539	1.52809	1.86746	1.31283
1.36077	1.26881	1.47233	1.30394	1.35687	1.29128	1.4219	1.40702	1.32152	1.33057		1.09456	1.06842	1.02993	1.14949	1.14571	1.03885	1.40183	1.00627	1.09205	1.00351		1.32788	1.43561	1.518	1.39062	1.25974	1.59609	1.54903	1.2807	1.2503	1.29744		1.28805	1.69668	1.74152	1.33224	1.44769	1.47254	1.49615	1.53657	1.79276	1.33321
1.34723	1.28714	1.49704	1.30876	1.36665	1.31284	1.43622	1.41386	1.32255	1.27426		1.10257	1.06773	1.02929	1.14205	1.15629	1.03776	1.40587	1.00518	1.09363	1.00501		1.34617	1.54648	1.53523	1.39506	1.26866	1.61096	1.56976	1.30793	1.27552	1.33033		1.30425	1.7518	1.78848	1.3401	1.44508	1.4866	1.52048	1.50563	1.79861	1.35052
1.3774	1.28874	1.51043	1.32464	1.37867	1.33198	1.45688	1.43103	1.31759	1.30016		1.09047	1.06974	1.02635	1.14539	1.18263	1.03929	1.35384	1.00511	1.09329	1.00626		1.31937	1.56012	1.56062	1.40532	1.27634	1.67566	1.53822	1.31986	1.31484	1.33587		1.29969	1.71804	1.77773	1.33111	1.43942	1.53177	1.52932	1.53625	1.92827	1.37978
1.4101	1.29154	1.51931	1.33236	1.40337	1.31676	1.46503	1.44641	1.33405	1.29052		1.09344	1.06163	1.02443	1.14858	1.15839	1.04455	1.3623	1.00498	1.09154	1.00354		1.31785	1.5336	1.58912	1.41052	1.27941	1.71364	1.57475	1.33243	1.3052	1.34044		1.31682	1.80782	1.74126	1.3174	1.45025	1.56219	1.51206	1.52084	2.00203	1.37067
1.40625	1.29963	1.53546	1.33862	1.42514	1.38231	1.47542	1.46198	1.33745	1.37937		1.09189	1.06426	1.02403	1.14622	1.17382	1.04353	1.40909	1.00511	1.08936	1.00428		1.34326	1.59589	1.60207	1.4086	1.28103	1.73369	1.66483	1.34017	1.29152	1.34436		1.28949	1.81517	1.77682	1.32777	1.42922	1.57213	1.52443	1.52959	1.99242	1.42881
1.40563	1.29561	1.51971	1.34696	1.43547	1.33762	1.48919	1.48279	1.33804	1.40284		1.09739	1.06664	1.02745	1.14684	1.14136	1.04263	1.3714	1.00541	1.0897	1.00535		1.34219	1.58968	1.63212	1.41563	1.28884	1.77917	1.52064	1.33064	1.31296	1.39246		1.30311	1.84069	1.78198	1.33255	1.43697	1.58422	1.54289	1.55836	1.97511	1.45066
1.3722	1.29421	1.52394	1.34755	1.45141	1.32667	1.52506	1.49888	1.34874	1.40199		1.09181	1.06186	1.02396	1.14279	1.17982	1.04749	1.41904	1.00749	1.08688	1.00361		1.37091	1.62277	1.66732	1.42709	1.31955	1.81967	1.59999	1.34137	1.3259	1.3753		1.32318	1.82085	1.77464	1.32923	1.43806	1.58196	1.51868	1.55232	1.94816	1.42
1.44864	1.29889	1.56992	1.35771	1.47158	1.30893	1.52322	1.51364	1.35194	1.38982		1.09304	1.06416	1.0239	1.14185	1.14567	1.04358	1.40869	1.00792	1.0863	1.00323		1.47613	1.70475	1.70857	1.42409	1.30409	1.84518	1.63173	1.36022	1.35252	1.40031		1.31151	1.85977	1.81988	1.34147	1.43766	1.5781	1.53939	1.56363	1.90341	1.48935
1.41111	1.305	1.58315	1.36515	1.5042	1.38767	1.5432	1.53261	1.35742	1.41019		1.08984	1.06896	1.02951	1.14129	1.16307	1.04544	1.38691	1.00761	1.08567	1.00273		1.42457	1.65322	1.73174	1.43284	1.31616	1.90523	1.5934	1.40361	1.33282	1.38938		1.34658	1.87943	1.784	1.3556	1.45059	1.63949	1.526	1.57033	2.10668	1.46937
1.44568	1.30683	1.64306	1.3684	1.5273	1.37737	1.57828	1.55198	1.36921	1.32798		1.0816	1.06836	1.03024	1.14385	1.14946	1.05091	1.40356	1.00756	1.0836	1.00331		1.43076	1.71878	1.75787	1.43801	1.31713	1.9484	1.6007	1.34748	1.35894	1.41862		1.37556	1.88257	1.82812	1.36028	1.46843	1.70755	1.54605	1.58814	2.1043	1.50626
1.44656	1.31407	1.61193	1.38074	1.5495	1.39528	1.57609	1.56493	1.37071	1.39361		1.09756	1.06328	1.03003	1.14422	1.18286	1.04619	1.36811	1.00838	1.083	1.00322		1.40625	1.67007	1.77219	1.44912	1.32326	2.01057	1.67798	1.37536	1.34648	1.4075		1.35338	1.88952	1.8023	1.36432	1.463	1.75019	1.53338	1.56362	2.20054	1.52166
1.44167	1.32716	1.6568	1.38581	1.56843	1.42132	1.60422	1.58214	1.38175	1.4075		1.09281	1.06785	1.02803	1.13851	1.18524	1.04651	1.35729	1.00422	1.08594	1.00378		1.55261	1.67383	1.74627	1.45348	1.34666	2.11831	1.73648	1.36429	1.37412	1.4185		1.37186	1.91244	1.81622	1.3816	1.48465	1.7672	1.54143	1.56388	2.1722	1.49183
1.48175	1.34661	1.68554	1.39765	1.58769	1.44623	1.62101	1.60422	1.39457	1.40617		1.09509	1.06263	1.02566	1.14003	1.18556	1.04548	1.38226	1.00422	1.08611	1.00278		1.66298	1.70922	1.82825	1.45721	1.35583	2.10339	1.66185	1.41439	1.36028	1.4363		1.37563	1.85343	1.80225	1.37504	1.48444	1.78154	1.56391	1.60038	2.05979	1.47047
1.4683	1.34865	1.74028	1.41043	1.61269	1.42638	1.64529	1.62078	1.40325	1.45823		1.09112	1.05984	1.01976	1.14087	1.19649	1.04605	1.40906	1.00736	1.0857	1.0031		1.58637	1.78351	1.92615	1.45354	1.37031	2.17415	1.60978	1.40819	1.38	1.40666		1.38925	1.77109	1.83303	1.38538	1.50288	1.80144	1.58541	1.59865	2.25808	1.52004
1.4723	1.35351	1.79648	1.41727	1.62825	1.39028	1.63199	1.64612	1.41031	1.53059		1.0871	1.06974	1.02353	1.13552	1.18098	1.04774	1.43546	1.00472	1.08795	1.00348		1.56472	1.79994	1.95035	1.47436	1.37979	2.24348	1.57707	1.46038	1.38519	1.42906		1.39146	1.89914	1.8079	1.39258	1.52173	1.84066	1.57515	1.61322	2.33778	1.54409
1.4761	1.36758	1.8362	1.42236	1.66809	1.44204	1.68093	1.66577	1.40968	1.48739		1.09169	1.07209	1.02322	1.14187	1.19891	1.04503	1.37239	1.00559	1.0894	1.00161		1.50708	1.77764	1.91766	1.48276	1.37997	2.2946	1.59757	1.44153	1.37322	1.43349		1.40173	1.89081	1.83112	1.41011	1.51169	1.87682	1.5669	1.63158	2.23541	1.58008
1.52074	1.37631	1.84953	1.43209	1.69314	1.43364	1.70484	1.69033	1.41708	1.46445		1.09443	1.071	1.02129	1.13901	1.18084	1.04607	1.38235	1.00766	1.08903	1.00339		1.44221	1.81543	1.84624	1.48476	1.38571	2.33664	1.67942	1.44343	1.39529	1.45751		1.41811	1.90771	1.82396	1.4142	1.54009	1.89359	1.58705	1.64201	2.12533	1.63392
1.47699	1.37623	1.8661	1.44468	1.71699	1.49706	1.725	1.70841	1.41491	1.50117		1.091	1.06426	1.02588	1.13274	1.177	1.04855	1.37489	1.00584	1.08926	1.00161		1.54012	1.82688	2.01349	1.49146	1.3831	2.42033	1.63523	1.44786	1.39126	1.43696		1.427	1.84266	1.82809	1.41472	1.52017	1.9128	1.60373	1.63109	2.17432	1.62741
1.54206	1.3861	1.89945	1.44627	1.75128	1.48215	1.75869	1.73568	1.4335	1.5299		1.08895	1.06905	1.0305	1.13257	1.1808	1.04557	1.40652	1.00502	1.09284	1.00134		1.46862	1.91722	1.9122	1.49656	1.3861	2.47088	1.67257	1.4607	1.39606	1.4416		1.43357	1.74549	1.81829	1.4281	1.54331	1.9308	1.62989	1.60213	2.31878	1.64778
1.52449	1.38719	1.87169	1.45734	1.7827	1.43554	1.79123	1.75321	1.44508	1.51431		1.09868	1.07361	1.02113	1.13339	1.18367	1.04488	1.40057	1.00673	1.09251	1.00107		1.38753	1.94295	2.08286	1.49938	1.39248	2.49891	1.79198	1.45562	1.42268	1.43987		1.42859	1.90107	1.82687	1.43717	1.50202	1.96736	1.64074	1.65121	2.28554	1.6658
1.54919	1.39174	1.8992	1.47524	1.80394	1.4953	1.79178	1.78073	1.44247	1.57918		1.09617	1.07575	1.0244	1.13723	1.17279	1.04351	1.42263	1.00877	1.09407	1.00091		1.45869	1.94643	2.06536	1.51038	1.38862	2.65508	1.77704	1.4443	1.41661	1.47033		1.46475	1.95241	1.87292	1.45914	1.52507	1.981	1.65068	1.66836	2.25355	1.68999
1.52821	1.39495	1.90692	1.47641	1.83364	1.5208	1.83437	1.80882	1.44668	1.60214		1.09376	1.07269	1.02464	1.13625	1.19257	1.04216	1.40685	1.00553	1.09405	1.00202		1.46815	1.9437	1.96579	1.51135	1.39874	2.79221	1.67585	1.47222	1.43191	1.47148		1.46859	1.95407	1.8614	1.51907	1.5415	1.98687	1.62689	1.69388	2.24089	1.73595
1.56979	1.39366	1.90857	1.48971	1.85991	1.54068	1.83661	1.83672	1.45721	1.55648		1.09071	1.06633	1.02611	1.13372	1.19426	1.03731	1.36456	1.00798	1.0932	1.00076		1.43272	2.05197	2.021	1.51451	1.41293	2.76145	1.7229	1.5051	1.48752	1.48481		1.45187	1.9993	1.8878	1.5493	1.5201	2.0376	1.65029	1.68352	2.39628	1.77531
1.60556	1.39783	1.94825	1.50323	1.89788	1.56324	1.854	1.86045	1.46064	1.6921		1.07778	1.06283	1.02858	1.13112	1.20402	1.03837	1.40609	1.00666	1.09166	1.00193		1.42761	2.07267	2.02406	1.52312	1.43007	2.86057	1.68079	1.51702	1.49909	1.48763		1.49693	2.06622	1.90566	1.54729	1.54158	2.07642	1.64823	1.69121	2.64139	1.81689
1.59001	1.38611	1.93514	1.51035	1.93159	1.60085	1.90984	1.8908	1.46801	1.60659		1.09132	1.06339	1.02786	1.13046	1.14835	1.03568	1.37584	1.00773	1.09341	1.00165		1.38174	2.06572	2.13281	1.53121	1.42336	2.97612	1.67561	1.52578	1.46942	1.50795		1.50529	2.04981	1.88202	1.55427	1.55189	2.0911	1.67685	1.70611	2.63533	1.84972
1.62945	1.3947	1.98246	1.52924	1.95544	1.63153	1.92216	1.91636	1.47967	1.72466		1.08373	1.06267	1.02586	1.13018	1.17285	1.03693	1.37355	1.00669	1.09306	1.00214		1.36341	2.10349	2.0585	1.54163	1.44722	3.11447	1.70036	1.53393	1.49614	1.50707		1.51856	2.15978	1.85532	1.54093	1.56954	2.10241	1.68717	1.72646	2.51056	1.8156
1.62006	1.40451	1.99916	1.53775	1.99775	1.62459	1.94572	1.95163	1.49144	1.65245		1.08535	1.05607	1.02352	1.133	1.18658	1.03656	1.40284	1.00548	1.09377	1.00115		1.37479	2.13353	2.14072	1.55174	1.46925	3.13289	1.81922	1.55775	1.5139	1.54763		1.50617	2.25181	1.85875	1.5466	1.55257	2.10309	1.68151	1.73485	2.59696	1.79443
1.63066	1.41182	2.03099	1.55166	2.02133	1.67905	1.95418	1.97947	1.49384	1.69732		1.09401	1.05591	1.02934	1.13147	1.1812	1.03746	1.3871	1.00751	1.0943	1.00014		1.44794	2.25133	2.21202	1.56289	1.49217	3.20718	1.7471	1.57596	1.50843	1.572		1.50239	2.11986	1.87786	1.5576	1.55851	2.11751	1.72292	1.71789	2.65428	1.90051
1.71829	1.41866	2.03586	1.56862	2.03679	1.65285	1.99253	2.00618	1.51064	1.79373		1.08519	1.06315	1.02503	1.13573	1.19101	1.03587	1.40101	1.007	1.09358	1.00178		1.41726	2.21404	2.05786	1.58218	1.49924	3.28379	1.81598	1.56174	1.51753	1.58701		1.51935	2.31329	1.892	1.55443	1.58751	2.14467	1.72948	1.78689	2.58301	1.87399
1.70429	1.4201	2.09302	1.57674	2.08131	1.64356	2.03502	2.03923	1.51808	1.71561		1.09393	1.06729	1.02469	1.14156	1.1731	1.03988	1.39394	1.00715	1.0935	1		1.40868	2.16594	2.03839	1.59224	1.4984	3.37774	1.84784	1.62052	1.53958	1.58698		1.5355	2.38483	1.82056	1.56174	1.59926	2.14184	1.74164	1.79529	2.43018	1.91322
1.69425	1.4177	2.14223	1.59136	2.11879	1.64616	2.04843	2.07508	1.51883	1.8419		1.09507	1.06811	1.02423	1.13869	1.16089	1.03707	1.42242	1.00803	1.09357	1.00206		1.45996	2.26188	2.11722	1.61544	1.50765	3.44808	1.85417	1.5747	1.51733	1.60226		1.56271	2.13513	1.85607	1.59288	1.57675	2.1913	1.76116	1.80781	2.59569	1.91231
1.75728	1.42641	2.11983	1.604	2.15384	1.70469	2.0797	2.10874	1.52085	1.71416		1.08545	1.06166	1.02349	1.13775	1.16449	1.03786	1.41935	1.00494	1.09196	1.0012		1.40491	2.34331	2.13255	1.6141	1.51266	3.54432	1.915	1.57773	1.5495	1.58269		1.55486	2.38112	1.87272	1.60909	1.60196	2.28037	1.74281	1.81045	2.57801	1.92105
1.76437	1.43027	2.18929	1.61223	2.19918	1.70109	2.14473	2.15186	1.53266	1.85768		1.08537	1.05358	1.03032	1.13614	1.18406	1.04032	1.40607	1.00765	1.09207	1.00301		1.38416	2.40645	2.12107	1.628	1.52562	3.67776	1.90681	1.61472	1.56809	1.62416		1.59089	2.54486	1.85227	1.62269	1.598	2.33462	1.78012	1.82463	2.77267	1.89833
1.80224	1.44613	2.21103	1.6256	2.24409	1.70668	2.1639	2.18686	1.54094	1.93671		1.07844	1.06067	1.02936	1.1386	1.17309	1.04044	1.37984	1.0073	1.09227	1.0019		1.44623	2.4062	2.01157	1.64212	1.55361	3.73032	1.88679	1.59581	1.58395	1.62892		1.58515	2.61044	1.85544	1.64475	1.63757	2.37731	1.8123	1.82593	2.77426	1.93304
1.80452	1.44513	2.2301	1.64081	2.29324	1.75076	2.16708	2.2232	1.55603	1.89111		1.09781	1.06651	1.02542	1.13781	1.17155	1.04378	1.41056	1.0073	1.09026	1.00141		1.47811	2.51787	2.11366	1.66577	1.57582	3.72456	2.02338	1.64485	1.59212	1.67146		1.6056	3.0622	1.84887	1.64545	1.64023	2.37832	1.82736	1.83702	2.82905	2.02349
1.865	1.44872	2.3095	1.65562	2.32378	1.73146	2.20217	2.2563	1.56071	1.99351		1.08636	1.06292	1.02338	1.137	1.14134	1.04246	1.42094	1.00659	1.09086	1.00215		1.38821	2.54873	2.13836	1.68714	1.59551	3.85803	2.00887	1.63522	1.62308	1.67753		1.62541	2.88718	1.88936	1.69077	1.62415	2.40367	1.84864	1.88476	2.61554	2.03632
1.83836	1.4508	2.38892	1.65638	2.37986	1.7376	2.24927	2.30843	1.56829	2.02944		1.08449	1.0659	1.02452	1.13275	1.17665	1.03777	1.43562	1.00705	1.08952	1.00164		1.41158	2.57885	2.09173	1.70197	1.6091	3.96495	1.98652	1.66653	1.69114	1.70072		1.61082	3.08741	1.84948	1.76064	1.64177	2.45224	1.83821	1.89055	2.65376	2.03194
1.82736	1.46065	2.42237	1.67839	2.44032	1.75036	2.26933	2.35789	1.57568	1.93553		1.08459	1.06495	1.01978	1.13457	1.18798	1.03863	1.46236	1.00631	1.08824	1.00137		1.39463	2.55952	2.07079	1.70334	1.61954	4.16506	1.89986	1.65899	1.6925	1.71644		1.63484	2.95948	1.90151	1.77512	1.66157	2.51876	1.85526	1.89716	2.88787	2.09214
1.88642	1.47153	2.47615	1.69223	2.48254	1.83407	2.30738	2.38735	1.58578	1.95174		1.08664	1.0609	1.02367	1.13327	1.1587	1.0382	1.40887	1.00752	1.08582	1.00319		1.38702	2.72415	2.06537	1.70797	1.63696	4.25861	1.96285	1.71945	1.67495	1.71023		1.64675	3.06149	1.8942	1.77062	1.66077	2.55839	1.87535	1.9152	3.18502	2.0874
1.92891	1.48318	2.51839	1.72023	2.52109	1.80848	2.31671	2.41997	1.6132	2.14847		1.09033	1.05628	1.02371	1.12977	1.18767	1.04107	1.38724	1.00815	1.08654	1.00142		1.36955	2.78015	2.11997	1.73116	1.6548	4.28152	2.1056	1.74602	1.67906	1.73934		1.66836	3.12291	1.88075	1.76213	1.69311	2.57375	1.88567	1.92454	3.21369	2.09432
1.95667	1.48804	2.55084	1.73668	2.55997	1.83403	2.36503	2.46862	1.61505	2.15664		1.08813	1.06533	1.02776	1.13251	1.17233	1.03904	1.36189	1.00745	1.08738	1.00299		1.33283	2.77718	2.066	1.7254	1.66135	4.32749	2.06306	1.76001	1.68653	1.7846		1.66029	3.00016	1.87371	1.76451	1.71385	2.62837	1.88259	1.97012	3.15282	2.15815
1.96108	1.49626	2.53481	1.75748	2.61676	1.91137	2.41035	2.50271	1.6227	2.20727		1.09329	1.0651	1.02486	1.13238	1.19823	1.04236	1.40203	1.00679	1.08713	1.00227		1.42235	2.78202	2.05454	1.77263	1.67199	4.4845	2.05102	1.73379	1.69107	1.81307		1.69156	2.82661	1.85833	1.76106	1.7221	2.65337	1.91169	1.97773	3.28609	2.10527
1.96213	1.4938	2.57517	1.76248	2.68574	1.92647	2.43972	2.5625	1.63298	2.11957		1.08759	1.06594	1.02704	1.13522	1.18115	1.03913	1.41014	1.00807	1.08738	1.00452		1.39085	2.89316	2.13457	1.78456	1.69353	4.52077	2.1567	1.76905	1.70048	1.76094		1.67884	3.07396	1.92149	1.78567	1.72089	2.65728	1.93303	1.96661	3.14979	2.1887
1.97415	1.48674	2.56797	1.78227	2.745	1.91262	2.49298	2.61822	1.64981	2.2547		1.08787	1.0635	1.02443	1.13107	1.21529	1.04101	1.38068	1.01094	1.08735	1.0034		1.35719	3.0229	2.04967	1.78949	1.71757	4.69199	2.18554	1.7561	1.70368	1.80843		1.69158	2.93774	1.88361	1.79782	1.73029	2.71158	1.93316	2.00873	3.19166	2.19238
2.02947	1.49082	2.62458	1.79431	2.82384	1.95116	2.49973	2.66239	1.64529	2.31668		1.0811	1.06259	1.02949	1.12758	1.19864	1.03767	1.42127	1.00813	1.08705	1.00273		1.46971	3.02863	2.10327	1.82676	1.71964	4.77736	2.25546	1.81181	1.70214	1.84217		1.69803	2.92223	1.90295	1.78535	1.74155	2.70774	1.93482	1.99938	3.08251	2.35928
2.04998	1.499	2.6689	1.81906	2.90338	1.96677	2.56418	2.72283	1.66175	2.34547		1.09215	1.05703	1.02634	1.12716	1.19368	1.04303	1.40685	1.00945	1.08686	1.00384		1.45953	3.01547	1.9363	1.83621	1.74485	4.82669	2.19483	1.81276	1.74031	1.87771		1.73301	2.92022	1.87827	1.79195	1.79662	2.72784	1.96497	2.07905	3.13319	2.3654
2.07238	1.50849	2.67352	1.8345	2.95241	1.99321	2.55906	2.77061	1.67269	2.36903		1.09229	1.05898	1.02498	1.13149	1.18564	1.04083	1.44665	1.00969	1.08801	1.00451		1.40717	3.069	2.02208	1.87605	1.77515	4.90739	2.20258	1.87611	1.73333	1.87859		1.74541	2.80447	1.8614	1.8344	1.76568	2.74736	1.95492	2.06204	2.73358	2.35675
2.14996	1.51759	2.73286	1.85119	3.02469	2.02497	2.60838	2.79724	1.68379	2.47981		1.09027	1.06647	1.02427	1.11744	1.15742	1.0401	1.3789	1.00859	1.08837	1.00419		1.40289	3.23377	2.11376	1.91276	1.79468	4.94982	2.34818	1.87254	1.74293	1.95805		1.74611	2.62262	1.88324	1.83268	1.81507	2.77819	1.99598	2.08377	3.01935	2.41897
2.19931	1.52098	2.74634	1.86803	3.07055	2.02396	2.65421	2.85191	1.70284	2.46308		1.08262	1.07179	1.01869	1.11758	1.18483	1.03829	1.42869	1.00769	1.08985	1.00216		1.40333	3.33643	2.13827	1.89767	1.81533	5.14412	2.37742	1.91255	1.75982	1.97973		1.75267	2.7938	1.91155	1.83962	1.8216	2.83249	1.98768	2.09406	2.84979	2.49537
2.22472	1.53078	2.73734	1.88121	3.15567	2.08021	2.69538	2.90941	1.71383	2.47693		1.08807	1.0693	1.02925	1.11906	1.14869	1.03875	1.42513	1.00831	1.09125	1.00306		1.39807	3.33982	2.19417	1.94014	1.85382	5.16771	2.37072	1.88534	1.78323	1.99867		1.7854	2.79024	1.93415	1.87824	1.84928	2.87675	1.98024	2.12587	3.1905	2.44009
2.2605	1.53271	2.79038	1.91414	3.23842	2.11441	2.75735	2.9598	1.71778	2.51829		1.08988	1.07103	1.02901	1.11681	1.19965	1.04151	1.36279	1.01033	1.09065	1.00324		1.41136	3.42498	2.25364	1.94498	1.88494	5.12008	2.53483	1.96247	1.8273	2.04346		1.78802	2.83579	1.916	1.89026	1.83697	2.93458	2.00905	2.13752	3.13585	2.41288
2.24085	1.53757	2.84006	1.92912	3.31424	2.16822	2.75941	3.01829	1.72898	2.47969		1.08475	1.07054	1.02844	1.11127	1.1847	1.04115	1.42055	1.01077	1.08907	1.00189		1.45188	3.52883	2.28418	1.96717	1.90982	5.19327	2.39848	1.955	1.83407	2.0652		1.82097	2.62827	1.90322	1.87472	1.90208	2.98944	2.01839	2.18222	3.27937	2.45048
2.25703	1.55206	2.89987	1.9448	3.40584	2.21132	2.79636	3.06558	1.7492	2.67514		1.0852	1.07135	1.02488	1.11014	1.17856	1.03617	1.39103	1.01037	1.09199	1.00263		1.40475	3.56532	2.34229	1.97673	1.91507	5.24436	2.4559	1.95456	1.93156	2.06158		1.82322	2.64045	1.89919	1.89403	1.92248	3.02981	2.03607	2.16088	3.29754	2.60657
2.36136	1.55625	2.91953	1.96312	3.47302	2.20201	2.86273	3.11489	1.74796	2.74186		1.07837	1.0663	1.02128	1.11153	1.19696	1.03984	1.37174	1.01006	1.09163	1.00279		1.39209	3.59681	2.49256	1.97638	1.90989	5.36551	2.48447	1.98104	1.94056	2.1013		1.84398	2.64111	1.8773	1.92434	1.93322	3.08534	2.05324	2.19535	3.15294	2.54979
2.37181	1.5644	2.97172	1.98152	3.55159	2.30213	2.88847	3.16023	1.76373	2.72588		1.0854	1.06358	1.02463	1.10479	1.18916	1.03804	1.38192	1.0065	1.09092	1.003		1.34618	3.66446	2.59816	2.00157	1.96291	5.40152	2.59395	2.03007	1.9265	2.15313		1.86418	2.6239	1.94087	1.94655	1.94437	3.14247	2.06973	2.17795	3.1763	2.68141
2.39126	1.57128	3.05381	1.99974	3.62324	2.24676	2.91254	3.23159	1.77859	2.84722		1.08906	1.06626	1.02482	1.10458	1.17032	1.038	1.41091	1.01047	1.09104	1.00341		1.30711	3.70741	2.5669	2.027	1.97805	5.51063	2.58452	2.01398	1.94327	2.17989		1.88125	2.65923	1.91305	1.95123	1.95286	3.17744	2.06659	2.23206	3.29598	2.71654
2.43639	1.58729	3.05172	2.02905	3.68057	2.26559	2.94608	3.28171	1.79408	2.92711		1.09185	1.06636	1.02258	1.10249	1.18706	1.03896	1.38756	1.01096	1.09216	1.00421		1.33497	3.83088	2.70777	2.08191	2.0145	5.62338	2.74583	2.0288	1.95051	2.17531		1.90838	2.69626	1.92085	1.97238	1.96568	3.21423	2.09718	2.24095	3.10103	2.67371
2.52706	1.59365	3.16433	2.04238	3.76218	2.34592	2.97113	3.35029	1.80028	2.88655		1.09756	1.06331	1.02193	1.10492	1.18373	1.03936	1.40553	1.01024	1.09065	1.00417		1.35685	3.85869	2.72194	2.07805	2.03211	5.75608	2.69214	2.05784	1.94848	2.21808		1.94148	2.8284	1.89922	1.96488	1.99914	3.24605	2.11055	2.25143	3.24367	2.79751
2.55178	1.60899	3.23522	2.06684	3.86403	2.3699	3.01713	3.41354	1.81429	3.04548		1.08716	1.06575	1.02555	1.09775	1.18461	1.03682	1.45224	1.00778	1.08948	1.00383		1.46738	4.06429	3.02163	2.11201	2.07355	5.68125	2.78141	2.05177	1.99997	2.24243		1.90064	2.73826	1.93385	1.9669	2.0092	3.31943	2.09501	2.28907	3.45853	2.7497
2.57398	1.61818	3.2127	2.08515	3.94056	2.42714	3.04972	3.47581	1.83413	3.01482		1.08404	1.06844	1.02155	1.10436	1.17949	1.03795	1.44661	1.00795	1.09201	1.00131		1.45743	4.02846	3.05717	2.12627	2.08629	5.77005	2.85515	2.09306	1.96754	2.24501		1.93635	2.76187	1.8848	1.98128	2.02819	3.35572	2.09666	2.28059	3.46845	2.76719
2.72758	1.62609	3.30694	2.10355	4.06726	2.47838	3.08613	3.52909	1.84143	3.22222		1.09071	1.0731	1.02249	1.10085	1.17246	1.04157	1.42855	1.01086	1.09067	1.00473		1.47184	4.19835	3.26901	2.15228	2.10699	5.79497	2.95071	2.10192	2.01831	2.28743		1.9447	2.7844	1.91762	1.98705	2.04734	3.36773	2.11408	2.31325	3.65896	2.78998
2.76944	1.63285	3.30267	2.11654	4.18438	2.47791	3.12782	3.61224	1.85254	3.29084		1.09042	1.07388	1.02245	1.09737	1.18389	1.04318	1.43678	1.01031	1.08923	1.0032		1.47169	4.22079	3.36356	2.11464	2.14408	5.77157	2.90744	2.10713	2.03967	2.27521		1.94172	2.75965	1.9282	2.00794	2.06666	3.37245	2.12638	2.27538	3.54921	2.85971
2.76942	1.64754	3.30873	2.13512	4.24913	2.55302	3.11999	3.68624	1.86201	3.23455		1.08845	1.07553	1.02439	1.09565	1.18151	1.0457	1.4356	1.01139	1.09108	1.00325		1.53728	4.27976	3.394	2.14777	2.16194	5.87914	3.12741	2.10196	2.07971	2.2614		1.985	2.78712	1.93292	2.0389	2.10101	3.38201	2.13274	2.30315	3.39197	2.88723
2.81697	1.65524	3.31852	2.15364	4.332	2.54404	3.17701	3.75335	1.8697	3.36131		1.09202	1.07293	1.02856	1.09583	1.15968	1.04615	1.39022	1.01032	1.09202	1.00473		1.70872	4.32972	3.54643	2.18057	2.19826	5.98005	3.03583	2.15308	2.06413	2.29601		2.0137	2.94531	1.93519	2.045	2.10392	3.43283	2.14634	2.3251	3.60506	2.94785
2.85162	1.66342	3.38371	2.17843	4.41998	2.5907	3.19592	3.8117	1.8936	3.36337		1.0922	1.07044	1.02449	1.09484	1.16478	1.04666	1.44025	1.0102	1.09087	1.00486		1.80394	4.36918	3.67656	2.23392	2.23554	6.0126	3.18649	2.19665	2.05849	2.28251		2.0124	3.01419	1.90713	2.06448	2.12554	3.40711	2.15985	2.36186	3.75651	3.03429
2.92849	1.66961	3.42405	2.19144	4.56091	2.66878	3.25968	3.88048	1.90494	3.59941		1.09015	1.07065	1.0169	1.0918	1.17583	1.04496	1.45595	1.00988	1.08986	1.00401		1.73382	4.45681	3.81439	2.27714	2.27474	6.08345	3.30499	2.19053	2.13685	2.31101		2.04266	2.92202	1.92365	2.14356	2.151	3.46496	2.15359	2.39505	3.68984	2.9948
2.94171	1.67702	3.47743	2.21177	4.66724	2.68555	3.25146	3.94812	1.91972	3.72301		1.0994	1.07604	1.02241	1.09065	1.20961	1.04504	1.47759	1.00908	1.0905	1.00473		1.75182	4.62199	4.0919	2.29161	2.29841	6.14508	3.3742	2.23851	2.13603	2.32415		2.05033	2.81642	1.95656	2.19674	2.14574	3.50011	2.16745	2.36994	3.96806	3.0937
3.00726	1.69171	3.4666	2.23003	4.79384	2.71854	3.3226	3.96725	1.9234	3.76206		1.09569	1.07366	1.02009	1.09418	1.17938	1.04601	1.40737	1.01008	1.09018	1.00405		1.6207	4.68403	4.1932	2.33629	2.31031	6.10196	3.46309	2.23829	2.12756	2.35888		2.06361	3.05846	1.92747	2.19486	2.18031	3.57218	2.21082	2.40676	3.811	3.15713
3.14023	1.70538	3.57635	2.24909	4.87821	2.75388	3.36798	4.01213	1.92888	3.7573		1.08792	1.07614	1.02362	1.08943	1.18644	1.04385	1.43305	1.01141	1.08856	1.004		1.61064	4.7332	4.35762	2.34259	2.32932	6.21886	3.48444	2.28314	2.14052	2.42689		2.07755	3.02199	1.92948	2.22785	2.21015	3.61702	2.17994	2.39684	3.62538	3.15883
3.20492	1.72342	3.64395	2.27126	5.0042	2.77823	3.47168	4.10917	1.95256	3.6354		1.09259	1.08238	1.02205	1.09024	1.17232	1.04535	1.42019	1.01156	1.08801	1.0033		1.57601	4.70766	4.67424	2.36229	2.36384	6.20434	3.74516	2.27127	2.16146	2.42554		2.08959	3.03893	1.9526	2.23942	2.20503	3.65975	2.22136	2.43926	3.41878	3.26412
3.22467	1.73069	3.696	2.27265	5.07369	2.82694	3.445	4.17079	1.96151	4.00941		1.0903	1.07995	1.03084	1.09112	1.18094	1.04415	1.50096	1.01168	1.08756	1.00413		1.53178	4.95019	4.72434	2.33054	2.38355	6.29335	3.61091	2.32818	2.19776	2.45146		2.10696	2.83891	1.95547	2.23481	2.20667	3.75048	2.21681	2.43513	3.36609	3.17826
3.25396	1.73217	3.7832	2.28725	5.18129	2.87469	3.47253	4.20427	1.98246	4.08197		1.09476	1.0754	1.02842	1.08767	1.16255	1.04159	1.48503	1.01131	1.08846	1.00459		1.51309	5.10731	5.1112	2.34564	2.40781	6.42661	3.89289	2.29546	2.30591	2.46237		2.13983	2.97941	1.94527	2.25022	2.24068	3.82065	2.24061	2.46701	3.63932	3.26411
3.36111	1.74775	3.83828	2.30436	5.32492	2.89015	3.54826	4.27772	1.9988	4.05004		1.07706	1.07348	1.02327	1.08875	1.18225	1.04387	1.4261	1.01106	1.08801	1.00405		1.53624	5.21534	5.25014	2.36809	2.46703	6.42557	3.82766	2.33463	2.37208	2.48621		2.14341	3.07242	1.98262	2.26923	2.24456	3.82681	2.23813	2.51756	3.4784	3.3362
3.38551	1.75649	3.86889	2.32951	5.45698	2.92428	3.57708	4.36619	2.02193	4.27401		1.09686	1.06927	1.02636	1.08884	1.16626	1.04322	1.45308	1.0115	1.08822	1.00214		1.49978	5.18144	5.57242	2.40926	2.52782	6.49903	4.23955	2.39196	2.4266	2.51053		2.16401	2.86286	1.97262	2.26082	2.22408	3.86885	2.23921	2.53028	3.53454	3.28517
3.48579	1.76853	3.94993	2.34424	5.57165	2.99273	3.60958	4.39924	2.03308	4.36678		1.09206	1.06838	1.02842	1.09194	1.19233	1.03534	1.44351	1.01094	1.0885	1.00351		1.52187	5.27808	5.82116	2.47059	2.55022	6.58053	4.30778	2.38111	2.40817	2.52193		2.17555	2.94464	1.97652	2.30165	2.29209	3.88539	2.25002	2.5628	3.53893	3.3781
3.50156	1.78789	3.88007	2.35915	5.67694	2.97314	3.65123	4.48835	2.0605	4.47058		1.09813	1.06917	1.02339	1.09618	1.15652	1.03959	1.44232	1.01037	1.08776	1.00223		1.47473	5.36276	5.94979	2.50055	2.60167	6.5858	4.69232	2.40363	2.43548	2.5767		2.22455	2.9067	1.97416	2.31192	2.31458	3.91213	2.2772	2.55995	3.58565	3.38997
3.7575	1.81088	3.88968	2.3763	5.76649	3.01101	3.65278	4.57433	2.0712	4.42223		1.08717	1.07323	1.02339	1.09811	1.19084	1.03678	1.48842	1.01469	1.08623	1.00445		1.49682	5.29142	6.22267	2.47486	2.64539	6.6984	4.49368	2.39841	2.40845	2.6113		2.25878	2.98145	1.97935	2.32818	2.35175	3.95758	2.28832	2.58615	3.61145	3.43866
3.71202	1.80537	4.05617	2.39131	5.90771	3.10388	3.71513	4.62069	2.0856	4.64472		1.08842	1.06903	1.02854	1.09448	1.17932	1.03701	1.46616	1.01184	1.08659	1.00401		1.46626	5.42606	6.43856	2.47665	2.66285	6.69226	4.60873	2.47193	2.43329	2.59632		2.25069	3.0061	1.96651	2.34862	2.40025	3.99086	2.30857	2.60074	3.60546	3.49674
3.8642	1.81759	4.05323	2.41472	6.06237	3.11768	3.74375	4.67891	2.08538	4.48138		1.09086	1.06803	1.02607	1.09802	1.18707	1.03377	1.3885	1.0121	1.09064	1.00477		1.49496	5.54431	6.8337	2.49756	2.74785	6.78214	4.81153	2.49507	2.41496	2.61498		2.27865	2.97157	1.966	2.35651	2.40136	4.00614	2.31028	2.61388	3.75182	3.49299
3.91001	1.82808	4.14244	2.44085	6.17935	3.1507	3.81745	4.76507	2.10384	4.74042		1.08921	1.06431	1.02767	1.10113	1.18545	1.03429	1.42256	1.01035	1.08815	1.00388		1.58806	5.44882	7.09805	2.48837	2.79475	6.85037	4.8789	2.54453	2.46713	2.70583		2.2839	3.02876	1.95594	2.36531	2.4317	4.02243	2.32228	2.65091	3.67742	3.46298
4.07526	1.83975	4.19266	2.44195	6.2952	3.16671	3.8558	4.84764	2.1121	5.02902		1.08016	1.06713	1.02421	1.09892	1.17737	1.03086	1.4097	1.01399	1.09101	1.00434		1.58848	5.5875	7.33227	2.53913	2.83904	6.89657	4.85954	2.50203	2.44003	2.70524		2.32239	3.01709	1.94751	2.37777	2.40638	4.01795	2.36066	2.70499	3.67881	3.5846
4.04349	1.86205	4.23283	2.4456	6.39426	3.23939	3.87996	4.91286	2.12493	5.15141		1.08516	1.07088	1.02631	1.10127	1.16159	1.03203	1.48969	1.01137	1.09167	1.00405		1.56677	5.72196	7.52628	2.53047	2.87195	6.91102	5.03393	2.5632	2.52403	2.76229		2.31668	3.0392	1.97734	2.38822	2.48366	4.07352	2.34861	2.70054	3.83224	3.49033
4.23666	1.889	4.24188	2.46577	6.54678	3.27452	3.88479	4.97959	2.1423	5.26662		1.08099	1.06679	1.02352	1.09944	1.17527	1.03402	1.43238	1.01178	1.09234	1.00439		1.50633	5.79781	7.71988	2.60472	2.92376	6.96001	5.16635	2.58405	2.53165	2.80741		2.34078	3.03851	1.98873	2.43085	2.51312	4.13421	2.36164	2.70411	3.65525	3.5905
4.32617	1.89492	4.2921	2.48296	6.70159	3.32696	3.96647	5.04161	2.16087	5.19142		1.08644	1.07216	1.02344	1.10008	1.1729	1.03243	1.40785	1.01225	1.09183	1.00568		1.54035	5.84128	7.5862	2.62684	2.96031	7.10318	5.10622	2.62094	2.54648	2.82533		2.38279	3.25086	1.99319	2.44315	2.53124	4.19729	2.38334	2.74156	3.75148	3.62212
4.23873	1.90979	4.318	2.499	6.86757	3.35492	3.99006	5.11963	2.18312	5.33072		1.08792	1.06871	1.02801	1.10203	1.16784	1.03518	1.47425	1.01505	1.09207	1.00572		1.54669	6.19115	7.98841	2.6631	2.99173	7.08731	5.39771	2.65669	2.54544	2.84795		2.41716	3.05263	1.98675	2.474	2.5795	4.17737	2.37812	2.77848	3.61029	3.73633
4.34483	1.91785	4.38052	2.51158	6.9869	3.34912	4.02415	5.17104	2.21064	5.31078		1.08654	1.06431	1.02421	1.09609	1.17511	1.03064	1.4	1.01182	1.08997	1.00537		1.53607	6.16418	8.0336	2.70849	3.0409	7.07998	5.53442	2.67392	2.60207	2.85493		2.41278	3.06565	1.95568	2.50651	2.60607	4.20654	2.4164	2.7861	3.7448	3.69652
4.47232	1.94061	4.39191	2.54398	7.10381	3.36103	4.06463	5.25932	2.2184	5.83733		1.08455	1.06671	1.02064	1.10109	1.17291	1.02857	1.42825	1.01127	1.09187	1.00546		1.59187	6.21391	7.99849	2.6984	3.09484	7.26864	5.77621	2.70414	2.6111	2.86872		2.42321	3.1006	1.97409	2.52779	2.64649	4.19911	2.39952	2.81197	4.1035	3.74412
4.57094	1.9523	4.46586	2.55624	7.26113	3.40341	4.15695	5.31179	2.24935	5.98278		1.0837	1.06437	1.02996	1.09649	1.18244	1.03203	1.44766	1.01156	1.09273	1.00537		1.66684	6.21095	8.25933	2.70257	3.16266	7.20655	5.87037	2.75897	2.69334	2.92801		2.42328	3.12718	1.93204	2.51936	2.69058	4.31282	2.42864	2.79065	4.0053	3.81481
4.56503	1.96529	4.49259	2.5747	7.36579	3.40986	4.20333	5.37763	2.28478	5.92222		1.09202	1.0665	1.02997	1.09872	1.16461	1.03073	1.4698	1.01215	1.08949	1.00427		1.67564	6.32945	8.24991	2.74612	3.23362	7.2381	5.86969	2.77988	2.7225	2.96341		2.46931	3.00215	1.99649	2.51092	2.68711	4.36282	2.466	2.79243	3.90633	3.88154
4.82471	1.97854	4.49293	2.59227	7.50675	3.4112	4.19454	5.46138	2.30391	5.84016		1.08319	1.07002	1.02891	1.10141	1.18841	1.03443	1.40559	1.0151	1.08907	1.00544		1.65866	6.34285	7.99594	2.7429	3.30596	7.32099	6.0418	2.78772	2.72863	2.96127		2.51147	3.10543	1.98842	2.52076	2.75222	4.38024	2.5021	2.86738	4.0553	4.02707
4.96369	2.00287	4.54979	2.61441	7.72867	3.43792	4.20339	5.5481	2.34211	6.12059		1.0849	1.06849	1.02598	1.09371	1.17025	1.03234	1.42861	1.01376	1.0892	1.00461		1.66317	6.25099	8.37996	2.77739	3.35646	7.31768	6.30432	2.8071	2.79034	3.01997		2.56181	3.16071	1.98622	2.54417	2.7609	4.45061	2.51455	2.8788	4.191	4.00351
4.99667	2.00524	4.59879	2.63174	7.83262	3.47672	4.23175	5.5962	2.37033	6.22708		1.08944	1.06424	1.0244	1.09853	1.1917	1.02801	1.43364	1.01182	1.08903	1.00437		1.7288	6.49847	8.63175	2.82661	3.40172	7.51175	6.29846	2.86276	2.88086	3.06664		2.5585	3.1709	2.00044	2.54025	2.77699	4.50214	2.52983	2.82737	3.99579	4.03843
5.08635	2.02916	4.68469	2.64837	7.90702	3.50466	4.30465	5.66734	2.38454	6.52277		1.07549	1.06349	1.02429	1.094	1.16495	1.03238	1.45344	1.01442	1.08838	1.00842		1.8593	6.5332	8.61979	3.17597	3.4488	7.46403	6.32796	2.86505	2.98154	3.08528		2.58712	3.12214	2.00243	2.59658	2.76915	4.5	2.5333	2.88795	4.07907	4.02819
5.11061	2.04094	4.80046	2.66174	8.06575	3.52968	4.31225	5.73263	2.41536	6.61856		1.07394	1.06318	1.0264	1.09095	1.19323	1.03582	1.46184	1.0138	1.08747	1.00675		1.87667	6.4785	8.48453	3.28742	3.51088	7.53184	6.45379	2.88532	3.01316	3.08027		2.6262	3.01161	2.00448	2.64208	2.83557	4.57786	2.56903	2.91733	4.2474	3.9928
5.13326	2.06161	4.87054	2.68034	8.2125	3.50883	4.37083	5.82014	2.43805	6.6305		1.08184	1.06463	1.02533	1.08874	1.1537	1.0327	1.40927	1.01355	1.08802	1.00522		1.91261	6.7805	8.66972	3.22977	3.57645	7.64705	6.86499	2.94005	3.02748	3.16839		2.60396	3.19554	2.02232	2.65292	2.83757	4.61706	2.62781	2.9573	4.08944	4.11106
5.33027	2.07009	4.97985	2.70141	8.30343	3.52568	4.4317	5.87124	2.45104	6.58184		1.08527	1.06927	1.02309	1.09073	1.15743	1.03498	1.42696	1.01285	1.09102	1.00578		1.94647	6.67019	8.58307	3.20393	3.64798	7.5728	6.70686	2.98789	3.0193	3.20765		2.64038	3.21848	2.03353	2.69094	2.95376	4.65912	2.72019	2.99816	4.13662	4.1667
5.34348	2.07875	5.05239	2.71444	8.41879	3.63439	4.44076	5.93553	2.48291	6.86906		1.08808	1.06332	1.02137	1.09129	1.18871	1.02886	1.41445	1.01025	1.08806	1.00586		1.89378	6.84221	8.77045	3.28647	3.69313	7.63746	7.04319	3.01745	2.99233	3.25991		2.69707	3.05917	2.0257	2.67096	2.91616	4.73756	2.76365	2.96208	4.19484	4.22945
5.4566	2.09196	5.12319	2.74215	8.59998	3.59286	4.44684	6.02514	2.50169	7.11656		1.07743	1.06182	1.02872	1.09139	1.15573	1.03254	1.41697	1.0092	1.08866	1.00513		1.75475	6.86097	8.71512	3.30105	3.7834	7.59893	6.99387	3.00933	3.00953	3.27762		2.71735	3.18536	2.02305	2.69624	3.01724	4.82997	2.80287	3.0158	4.09615	4.18357
5.50749	2.12299	5.17973	2.76653	8.73034	3.65223	4.51412	6.08259	2.52909	7.47628		1.09074	1.06047	1.02546	1.0897	1.16375	1.03167	1.46772	1.01196	1.08884	1.00407		1.72669	6.97744	8.73947	3.30081	3.83286	7.8056	7.12099	3.04304	3.0467	3.26511		2.74232	2.9875	2.05171	2.73979	3.05092	4.86719	2.7934	3.05842	4.45601	4.14861
5.64703	2.1397	5.17536	2.77659	8.81729	3.6737	4.60011	6.2425	2.55083	7.32169		1.08179	1.06421	1.02419	1.09078	1.17408	1.03312	1.45434	1.00896	1.09024	1.0058		1.65657	7.02033	8.8012	3.33473	3.90462	7.79141	6.93485	3.04032	3.1	3.33787		2.74564	3.23605	2.03883	2.73552	3.06786	4.90247	2.85731	3.10017	4.29414	4.30027
5.61947	2.16566	5.21099	2.81024	8.917	3.63681	4.64922	6.36066	2.60256	7.52828		1.08349	1.06539	1.02529	1.08661	1.17194	1.03339	1.40249	1.01001	1.08931	1.00421		1.67477	7.17747	8.97817	3.2834	3.9346	7.85055	7.07373	3.10134	3.10127	3.40853		2.76243	3.22972	2.07973	2.74361	3.10655	4.93567	2.87852	3.10832	4.22185	4.35273
5.75955	2.17864	5.21541	2.8283	9.09401	3.72086	4.60243	6.33677	2.64436	7.67957		1.07759	1.06793	1.02268	1.09462	1.18348	1.03417	1.47007	1.00928	1.0883	1.00585		1.67759	7.18659	8.76694	3.35971	4.00039	7.94458	7.57796	3.17634	3.11131	3.42583		2.80466	3.16805	2.05093	2.75651	3.15032	4.98771	2.93904	3.12233	4.15531	4.28433
5.63171	2.19155	5.14665	2.85001	9.25057	3.71903	4.72377	6.38522	2.69103	7.93487		1.08024	1.06442	1.02321	1.09273	1.1772	1.03779	1.43398	1.00888	1.08915	1.00799		1.70352	7.16017	8.81007	3.33672	4.05286	8.00782	7.62031	3.21738	3.16513	3.47297		2.83113	3.08117	2.07968	2.74941	3.18058	4.98196	3.02013	3.19276	4.11751	4.37831
5.9319	2.22556	5.28295	2.88209	9.3143	3.82348	4.75234	6.55592	2.73514	8.11781		1.07542	1.06363	1.0274	1.08818	1.17454	1.0367	1.43474	1.00809	1.08689	1.00677		1.61648	7.1808	8.67908	3.35404	4.11803	8.04084	7.7886	3.20077	3.21237	3.55524		2.84876	3.10441	2.08027	2.75803	3.27286	5.06086	3.02329	3.22825	4.32799	4.46235
5.83296	2.23752	5.34503	2.90961	9.41754	3.8724	4.75662	6.53151	2.77349	8.2293		1.06991	1.06163	1.02628	1.08713	1.20166	1.03317	1.42522	1.00943	1.08916	1.00766		1.61208	7.23235	8.75111	3.40929	4.19335	8.06449	7.79596	3.25764	3.27566	3.53873		2.83426	3.32265	2.07628	2.78539	3.33919	5.10112	3.14247	3.26153	4.325	4.40412
6.00689	2.24723	5.31442	2.93317	9.52608	3.84367	4.79475	6.54092	2.82564	8.33539		1.08172	1.0646	1.02189	1.09402	1.18635	1.04151	1.4562	1.01235	1.0861	1.00742		1.61432	7.21207	8.70812	3.43766	4.27108	8.11291	7.85272	3.25993	3.3555	3.55804		2.88833	3.2153	2.111	2.79778	3.3234	5.14914	3.21334	3.25722	4.36928	4.44365
6.07827	2.26505	5.36308	2.95553	9.63155	3.87607	4.84936	6.70629	2.86161	8.53986		1.08124	1.07014	1.02265	1.09281	1.17331	1.03688	1.4571	1.00964	1.08708	1.00797		1.68263	7.33185	8.5959	3.43742	4.3556	8.14888	7.91501	3.34382	3.43282	3.58668		2.93598	3.42966	2.10809	2.81428	3.3772	5.16081	3.35583	3.32057	4.43799	4.40986
6.13399	2.28849	5.43971	2.98727	9.7028	3.85152	4.92302	6.76201	2.90409	8.79913		1.07322	1.06814	1.02937	1.09366	1.15563	1.03757	1.43497	1.01231	1.08799	1.00679		1.7083	7.53828	8.75869	3.39042	4.44433	8.11254	7.81893	3.39241	3.4583	3.61653		2.94283	3.25809	2.07023	2.84632	3.39237	5.24812	3.51084	3.3348	4.46495	4.49391
6.19787	2.31665	5.4288	3.00566	9.75419	3.9148	4.94259	6.77727	2.92797	8.91881		1.07691	1.06391	1.02327	1.09611	1.15972	1.03645	1.43632	1.01278	1.0869	1.00677		1.67099	7.51363	8.61268	3.38221	4.52064	8.20792	8.13766	3.34634	3.45805	3.5924		3.0186	3.45521	2.10243	2.86395	3.47826	5.26012	3.64654	3.37307	4.45986	4.56106
6.24429	2.33418	5.45584	3.02561	9.84621	4.04765	4.95673	6.87921	2.97317	8.97743		1.07472	1.06398	1.02847	1.10053	1.16743	1.0358	1.45395	1.01323	1.08845	1.00713		1.73851	7.67551	8.51169	3.48152	4.56866	8.17109	8.4288	3.46732	3.50034	3.70435		3.00209	3.31811	2.08797	2.82381	3.46869	5.29214	3.76931	3.36097	4.43343	4.52433
6.4302	2.3609	5.4542	3.05132	9.98186	4.07321	4.99603	6.94166	3.00979	9.41536		1.07145	1.06342	1.02885	1.09097	1.1631	1.03282	1.48552	1.01381	1.08845	1.00836		1.71099	7.89548	8.36394	3.5187	4.66217	8.19778	8.11909	3.48155	3.53217	3.70808		2.99459	3.48022	2.08084	2.87114	3.49959	5.32216	3.91928	3.40541	4.45154	4.53002
6.5224	2.39803	5.58997	3.07357	10.1211	4.07093	5.02047	7.005	3.05596	9.34624		1.0773	1.06563	1.02308	1.0995	1.15178	1.03439	1.43442	1.01333	1.08928	1.00953		1.7173	7.97577	8.56367	3.53262	4.74905	8.24949	8.71858	3.49261	3.59729	3.73721		3.06517	3.39544	2.11302	2.95734	3.57598	5.36659	4.03566	3.50237	4.43103	4.53146
6.68758	2.42376	5.62718	3.10173	10.215	4.10969	5.04545	7.08896	3.10515	9.55922		1.07742	1.06511	1.02405	1.0971	1.14737	1.03487	1.45713	1.01458	1.08873	1.00784		1.75939	7.91438	8.34766	3.50948	4.79315	8.20215	8.06089	3.52782	3.66771	3.81993		3.13639	3.43226	2.09247	3.09365	3.6638	5.3705	4.1999	3.48648	4.47354	4.56245
6.67671	2.45134	5.72942	3.12067	10.2834	4.1596	5.10075	7.16528	3.15526	9.78585		1.07141	1.06353	1.01908	1.09948	1.20409	1.03497	1.50444	1.01331	1.08989	1.00756		1.73304	7.86211	8.28474	3.48256	4.88643	8.286	8.7748	3.51351	3.65511	3.89031		3.13365	3.37901	2.11856	3.17857	3.66829	5.4305	4.34152	3.52024	4.3926	4.65752
6.65102	2.47307	5.81475	3.15306	10.3804	4.23757	5.1345	7.16215	3.19215	10.0384		1.06893	1.0664	1.0227	1.09584	1.18482	1.0325	1.42714	1.01359	1.08945	1.00728		1.74392	7.89063	8.49753	3.51181	4.94103	8.26803	8.71652	3.56699	3.74844	3.95105		3.14969	3.85236	2.10179	3.21859	3.76424	5.45567	4.47441	3.54011	4.3672	4.68692
6.77948	2.50214	5.77529	3.17467	10.4409	4.23095	5.17345	7.17613	3.24144	10.0913		1.07311	1.06916	1.02352	1.10128	1.16474	1.03498	1.45052	1.01469	1.0909	1.00879		1.76498	8.08074	8.48812	3.50987	5.00834	8.30851	8.88693	3.60995	3.80977	4.00681		3.20126	3.82615	2.09865	3.19133	3.85369	5.43908	4.6524	3.6083	4.3289	4.70525
6.94184	2.53384	5.87571	3.20108	10.4609	4.32092	5.30919	7.29343	3.30373	10.1502		1.07388	1.07204	1.02485	1.1012	1.18044	1.03694	1.4616	1.01729	1.0922	1.00879		1.81821	7.82807	8.39975	3.55411	5.07415	8.42152	8.55601	3.64485	3.84626	4.04207		3.19192	4.00931	2.09624	3.14136	4.0246	5.44762	4.82335	3.67924	4.5055	4.67585
7.07946	2.56845	5.89765	3.2367	10.5209	4.40586	5.2927	7.31054	3.34946	10.3012		1.06507	1.07504	1.02432	1.1011	1.14879	1.03478	1.44311	1.01479	1.09263	1.00736		1.90015	7.84771	8.36765	3.55404	5.18225	8.51623	9.04598	3.71243	3.92569	4.08601		3.26948	4.02446	2.09054	3.11612	3.99445	5.57412	5.01519	3.65943	4.47025	4.62493
6.95192	2.59143	5.8839	3.26962	10.6111	4.40784	5.29679	7.37133	3.3841	10.2831		1.07178	1.07482	1.02359	1.09655	1.13852	1.03161	1.45019	1.0138	1.08906	1.00943		1.91616	7.90323	8.19297	3.59713	5.24025	8.45303	8.90203	3.73626	3.9663	4.11057		3.27812	3.66335	2.10887	3.13877	4.11089	5.6241	5.21772	3.68577	4.61665	4.74935
7.13662	2.62486	5.96225	3.28773	10.6822	4.40938	5.35916	7.46678	3.42693	10.4497		1.06947	1.07171	1.02365	1.09854	1.17678	1.03274	1.46589	1.01598	1.09187	1.00764		1.86266	7.91163	8.33565	3.61241	5.33435	8.50537	8.80054	3.77389	3.97612	4.17071		3.27509	3.6225	2.08963	3.10607	4.10513	5.57563	5.31798	3.72264	4.7114	4.74973
7.15993	2.65928	5.9511	3.31439	10.685	4.46775	5.38202	7.52786	3.483	10.5664		1.08008	1.07413	1.02731	1.10308	1.16005	1.03175	1.44638	1.01748	1.08964	1.00861		1.87432	7.98844	8.03262	3.6189	5.40831	8.52645	8.89368	3.82651	3.96579	4.21972		3.34844	3.49231	2.11321	3.08181	4.17037	5.63204	5.46373	3.70872	4.75049	4.84757
7.29911	2.70188	6.03323	3.33846	10.7578	4.63381	5.4251	7.52216	3.51908	10.6659		1.08392	1.07168	1.02275	1.10056	1.16236	1.03381	1.45324	1.01442	1.09177	1.01022		1.88201	8.04162	8.05551	3.67041	5.47571	8.56296	9.00777	3.86581	4.11871	4.28995		3.35217	3.60336	2.17929	3.10027	4.18845	5.65328	5.59245	3.71507	4.69509	4.8137
7.27436	2.73346	6.03431	3.36719	10.844	4.55516	5.43396	7.58584	3.55966	10.773		1.07911	1.06931	1.0208	1.10374	1.18726	1.03035	1.51964	1.01743	1.0926	1.00883		1.92122	8.10194	8.26492	3.63523	5.61689	8.50499	9.22625	3.90069	4.21037	4.31278		3.32144	3.49016	2.10098	3.08499	4.22819	5.72112	5.7639	3.7565	4.66452	4.86747
7.19923	2.7623	6.11396	3.3901	10.8617	4.59522	5.47251	7.65563	3.61992	10.8833		1.07835	1.07083	1.02363	1.09995	1.18736	1.0313	1.4742	1.01855	1.09095	1.00963		1.89922	8.2807	8.04935	3.66757	5.69334	8.59242	9.01485	3.94704	4.23334	4.32095		3.42836	3.49543	2.11811	3.12504	4.23195	5.70955	5.96756	3.76942	4.76514	4.97149
7.25263	2.81079	6.23379	3.41635	10.8676	4.60014	5.49477	7.67351	3.67569	10.9453		1.07572	1.06954	1.02424	1.10043	1.18417	1.03116	1.47665	1.01557	1.09098	1.01078		1.90661	8.26102	7.93018	3.66745	5.79426	8.5525	9.23971	3.94877	4.28037	4.4114		3.45021	3.535	2.1437	3.08677	4.26557	5.74141	6.03048	3.83135	4.691	5.00512
7.45059	2.83903	6.25072	3.44248	10.9589	4.69865	5.48876	7.73829	3.72634	11.0857		1.07357	1.06812	1.02436	1.10441	1.1537	1.0337	1.43226	1.01844	1.0882	1.00924		1.84876	8.12076	7.86796	3.64656	5.85063	8.6246	9.43592	3.94376	4.37734	4.45677		3.4823	3.38877	2.105	3.09232	4.35961	5.77396	6.2495	3.82619	4.73801	4.99913
7.43896	2.85682	6.23192	3.46819	11.0101	4.82829	5.51677	7.78573	3.78667	11.1452		1.07485	1.06466	1.02091	1.10344	1.14921	1.0295	1.47224	1.01796	1.08822	1.0093		1.85471	8.11735	8.06395	3.71816	5.94159	8.63091	9.24369	4.05993	4.37216	4.45481		3.54355	3.18848	2.12287	3.09533	4.41068	5.82728	6.38834	3.88464	4.79509	5.05311
7.50433	2.88032	6.43025	3.49269	10.995	4.813	5.64974	7.81037	3.84608	11.1857		1.0726	1.06261	1.02809	1.10305	1.16762	1.02489	1.44362	1.01906	1.08886	1.01069		1.93442	8.32649	7.73787	3.70906	6.01938	8.57422	9.22367	4.11311	4.52645	4.51518		3.57192	3.31059	2.15005	3.13406	4.45162	5.8389	6.45026	3.90368	4.65844	4.96164
7.49221	2.93578	6.37098	3.51388	11.0913	4.9162	5.63473	7.87166	3.91158	11.2521		1.06567	1.06256	1.02247	1.10685	1.18154	1.02289	1.50217	1.01704	1.08885	1.00953		1.90117	8.2762	7.85784	3.66013	6.09737	8.68267	9.07095	4.17405	4.6283	4.56043		3.5674	3.47737	2.16856	3.15849	4.46483	5.82708	6.62351	3.90397	4.88945	5.04179
7.52499	2.97697	6.51018	3.55804	11.0894	4.89954	5.59065	7.92844	3.98279	11.3418		1.07649	1.06744	1.02352	1.10848	1.1513	1.02118	1.44882	1.01868	1.08936	1.00815		2.02356	8.4322	7.94011	3.73592	6.17153	8.68578	9.34611	4.20468	4.65204	4.55806		3.64482	3.34251	2.1694	3.1754	4.56507	5.84011	6.87216	3.91761	4.74188	5.04146
7.53297	3.00849	6.59633	3.57464	11.1636	4.98958	5.66862	7.97153	4.05321	11.5178		1.07762	1.069	1.02508	1.10619	1.15903	1.02578	1.50387	1.01558	1.08667	1.00929		2.00991	8.62195	7.80988	3.76116	6.2286	8.59403	9.55764	4.21672	4.65363	4.60457		3.64616	3.42625	2.18842	3.17507	4.63721	5.8693	6.84474	3.97849	4.67703	5.10004
7.5683	3.04868	6.49149	3.6001	11.1984	5.04229	5.66756	8.01255	4.1246	11.6233		1.07231	1.06966	1.02473	1.10771	1.17968	1.02769	1.48588	1.01883	1.08747	1.00865		2.37907	8.85345	7.98048	3.78329	6.3068	8.70785	9.6901	4.22578	4.72287	4.66553		3.69749	3.55601	2.17952	3.21937	4.72966	5.91338	6.73284	4.03748	4.69127	5.0679
7.63686	3.10655	6.63329	3.63973	11.2069	5.05181	5.69745	8.06861	4.18239	11.6261		1.06862	1.07203	1.03033	1.11077	1.17481	1.02762	1.449	1.01922	1.0857	1.01014		2.63924	8.82492	7.90334	3.79746	6.4047	8.66858	9.86448	4.30457	4.71926	4.70526		3.7265	3.4923	2.17491	3.26141	4.74301	5.85512	6.79779	4.0145	4.69501	5.09962
7.7685	3.15468	6.59064	3.65951	11.2071	5.03065	5.72614	8.08925	4.25335	11.7058		1.07675	1.07615	1.02274	1.10636	1.18794	1.02708	1.47691	1.01855	1.08562	1.01085		2.73143	8.69154	7.91184	3.75908	6.49897	8.67522	9.89712	4.30305	4.80916	4.80885		3.76908	3.66205	2.1566	3.26966	4.79811	5.9462	6.91211	4.07684	4.69838	5.14482
7.78544	3.20842	6.60906	3.68228	11.2659	5.24414	5.73745	8.15237	4.32341	11.6588		1.07736	1.07487	1.02649	1.10666	1.15126	1.02801	1.45593	1.01927	1.08533	1.0085		2.91484	8.70519	7.99993	3.84974	6.56878	8.69202	9.70779	4.33422	4.84548	4.84802		3.81061	3.75504	2.16528	3.27813	4.88432	5.98104	6.93593	4.06647	4.77872	5.18091
7.73549	3.24439	6.569	3.72026	11.29	5.24701	5.79458	8.1771	4.36547	11.9886		1.07633	1.07203	1.02333	1.1077	1.1485	1.03076	1.43077	1.01887	1.08528	1.00822		2.93733	8.59469	7.79685	3.84026	6.6737	8.71125	9.90839	4.39657	4.84754	4.84968		3.83045	3.86895	2.16872	3.29864	4.8596	5.9856	7.01858	4.09204	4.69218	5.12749
7.73566	3.28757	6.65441	3.74511	11.3473	5.27288	5.80961	8.22516	4.45416	11.9356		1.08099	1.06854	1.02627	1.10799	1.15766	1.02693	1.46328	1.01571	1.08435	1.00993		2.83861	8.58534	7.92851	3.90512	6.7361	8.84201	10.1577	4.42976	5.0203	4.928		3.86679	3.71188	2.19463	3.33512	4.92233	5.96976	7.16255	4.14335	4.82339	5.2506
7.78154	3.31537	6.73106	3.76963	11.3565	5.42711	5.81644	8.27854	4.49479	12.0257		1.08512	1.06884	1.02145	1.10681	1.13065	1.02829	1.50128	1.01881	1.08197	1.01115		2.704	8.72703	7.63124	3.89603	6.82827	8.77188	9.88169	4.46337	5.0306	4.99805		3.85464	3.79928	2.20684	3.30613	4.99199	6.01121	7.23885	4.2169	4.73894	5.1536
8.06503	3.35764	6.71895	3.79036	11.363	5.3964	5.87553	8.29058	4.5709	12.0903		1.06916	1.07144	1.02581	1.10247	1.16779	1.02768	1.47978	1.01812	1.08214	1.01045		2.51568	8.6827	7.92827	3.84931	6.91619	8.77034	9.93877	4.57707	5.21056	5.06046		3.88833	3.84101	2.15186	3.33626	5.1254	6.05015	7.30282	4.13049	4.67294	5.22521
7.87471	3.39207	6.65789	3.82099	11.4059	5.49004	5.90013	8.35508	4.67414	12.1442		1.0704	1.0694	1.02353	1.10006	1.14864	1.02965	1.46293	1.0178	1.08128	1.0123		2.3063	8.43686	7.64548	3.85048	7.00452	8.92278	10.0569	4.56474	5.13121	5.2045		3.97402	3.99044	2.23585	3.36651	5.14856	6.10712	7.36741	4.23756	4.75093	5.32676
7.99872	3.45283	6.7701	3.84486	11.4588	5.6142	5.901	8.39993	4.74641	12.0934		1.07788	1.06459	1.0232	1.10552	1.18234	1.02711	1.47992	1.01787	1.08089	1.01123		2.34298	8.65574	7.63287	3.88852	7.0785	8.91969	10.1516	4.5839	5.33547	5.27482		3.98169	3.8571	2.20947	3.37644	5.22689	6.11286	7.48888	4.19977	4.84159	5.22483
8.03026	3.52616	6.78703	3.88243	11.4162	5.49179	5.91489	8.45808	4.77617	12.1326		1.07412	1.06402	1.02917	1.10796	1.18397	1.03407	1.45073	1.01854	1.08088	1.011		2.2885	8.50488	7.82324	3.96338	7.15285	8.89654	10.1208	4.62507	5.3208	5.26527		4.05555	3.85799	2.22529	3.38087	5.25696	6.16708	7.56062	4.31351	4.93061	5.28265
7.90537	3.58203	6.84232	3.90838	11.3992	5.69285	5.95367	8.51088	4.84622	12.3332		1.07215	1.06923	1.02781	1.10406	1.15652	1.0346	1.5172	1.01889	1.08228	1.00958		2.24861	8.6315	7.60426	3.90091	7.21929	8.84898	10.1744	4.67756	5.38484	5.41334		4.06776	3.90291	2.19715	3.39189	5.3909	6.17272	7.55864	4.36417	5.01986	5.35334
7.99357	3.65873	6.99046	3.92544	11.4775	5.69161	6.00567	8.5441	4.92605	12.2954		1.07192	1.06997	1.02468	1.1075	1.18335	1.03167	1.47147	1.01833	1.08367	1.01057		2.3072	8.81406	7.53844	3.89225	7.2851	8.92469	10.323	4.72278	5.58799	5.49455		4.09664	3.71573	2.23402	3.39803	5.46325	6.22056	7.58613	4.40767	5.10893	5.30072
7.96518	3.70133	6.86928	3.96063	11.432	5.63338	5.94753	8.6035	4.97884	12.3202		1.07149	1.07306	1.03028	1.10713	1.16734	1.03537	1.43601	1.01821	1.08163	1.00979		2.24206	8.79723	7.69731	4.00683	7.39669	8.93164	10.4714	4.78841	5.64897	5.45436		4.13319	3.99774	2.26147	3.41631	5.49275	6.29414	7.71841	4.4107	4.8029	5.29226
8.16853	3.74864	6.99057	3.99043	11.4765	5.8014	5.99376	8.6002	5.01775	12.3542		1.07393	1.0726	1.02188	1.10194	1.17916	1.03465	1.45816	1.01771	1.08339	1.01074		2.18249	8.6967	7.56679	3.94986	7.45838	8.86336	10.1724	4.85093	5.82826	5.52174		4.16924	3.71761	2.26713	3.46721	5.56598	6.28891	7.70454	4.47393	4.65151	5.38561
8.12977	3.78586	7.02606	4.01572	11.5066	5.82249	6.03217	8.5812	5.09347	12.38		1.06333	1.06687	1.0258	1.10418	1.16472	1.03621	1.42568	1.01869	1.08387	1.00969		2.18948	8.68407	7.51638	3.96272	7.52379	8.95211	9.85438	4.82862	6.00804	5.58372		4.20054	3.93622	2.23026	3.5442	5.62293	6.28004	7.85808	4.44092	4.63488	5.33733
8.10708	3.86244	7.05924	4.04971	11.5368	5.81347	6.07755	8.58406	5.13184	12.3554		1.06906	1.06821	1.0212	1.10416	1.16145	1.03482	1.48889	1.0175	1.08302	1.01066		2.30385	8.83656	7.57195	3.97173	7.62758	8.94984	10.1371	4.90603	6.13664	5.58964		4.21929	3.84882	2.27952	3.56287	5.67003	6.27661	7.92079	4.49572	4.9741	5.3852
8.08561	3.90264	7.0235	4.08006	11.5037	5.91234	6.08557	8.66468	5.13316	12.5397		1.06446	1.06791	1.0237	1.1026	1.17869	1.03488	1.47948	1.01849	1.08418	1.01042		2.25897	8.66463	7.45719	3.97935	7.68297	8.86568	10.4517	4.91263	6.18289	5.66807		4.26074	4.09345	2.28768	3.56347	5.756	6.3193	7.93868	4.55265	4.79432	5.38666
8.16815	3.97206	7.17115	4.10635	11.5839	5.85996	6.10808	8.68833	5.20042	12.5899		1.06442	1.06646	1.02574	1.10428	1.1545	1.03478	1.45261	1.01936	1.08339	1.01013		2.307	8.68585	7.53317	4.02737	7.73173	8.95967	10.1478	5.00239	6.29736	5.72001		4.29223	4.0161	2.25443	3.59813	5.82284	6.25924	7.93427	4.63598	5.14352	5.36431
8.30043	4.06411	7.22933	4.13503	11.5893	6.02121	6.13626	8.71172	5.30661	12.6467		1.07298	1.06626	1.02649	1.10246	1.18143	1.03458	1.52159	1.02116	1.08591	1.00895		2.36062	8.75503	7.36677	4.07083	7.78829	8.89723	10.5689	5.02841	6.29998	5.75525		4.39571	4.08695	2.27263	3.61975	6.02553	6.27903	7.90137	4.65297	4.85478	5.46841
8.18262	4.10422	7.40784	4.17621	11.5373	6.02911	6.16163	8.75295	5.32792	12.7794		1.07248	1.06828	1.02444	1.10713	1.14012	1.03322	1.53316	1.01851	1.08522	1.01141		2.31049	8.77396	7.49459	4.10726	7.86158	8.98668	10.4535	5.07783	6.40141	5.8364		4.41485	4.28618	2.28095	3.60398	6.13527	6.26363	7.98888	4.68849	4.80657	5.52094
8.37796	4.18214	7.32904	4.20538	11.5952	6.01098	6.24022	8.75734	5.34385	12.7546		1.06482	1.07052	1.02598	1.10114	1.15876	1.0315	1.50104	1.01941	1.08637	1.00953		2.29199	8.74012	7.47287	4.12922	7.9197	8.93898	10.7675	5.12337	6.47667	5.92584		4.3732	4.00906	2.2595	3.62039	6.16588	6.25899	8.26637	4.67806	4.75626	5.53783
8.25961	4.27534	7.27138	4.22968	11.5838	6.03877	6.26007	8.76805	5.48802	12.7376		1.07083	1.0669	1.0276	1.10558	1.16773	1.03341	1.48332	1.02193	1.0866	1.01018		2.43003	8.89803	7.62546	4.08777	7.96834	8.94034	10.469	5.19407	6.5819	5.9322		4.44706	4.24079	2.26304	3.66515	6.30753	6.23548	8.24777	4.75759	5.02681	5.53831
8.2855	4.32889	7.3311	4.28243	11.597	6.22468	6.25352	8.80841	5.55889	12.7568		1.06646	1.07162	1.02232	1.10583	1.15482	1.03068	1.56049	1.01816	1.08997	1.01339		2.41905	8.99067	7.39583	4.08691	8.00645	9.03388	10.4803	5.25136	6.67934	6.05521		4.49158	4.37009	2.30255	3.68931	6.36756	6.29264	8.05704	4.81327	4.84535	5.56239
8.32595	4.3867	7.37601	4.30245	11.6297	6.32858	6.2509	8.84945	5.55223	12.8258		1.07009	1.06543	1.02161	1.10103	1.18082	1.02843	1.54194	1.01868	1.09045	1.01231		2.38731	9.00187	7.5328	4.16312	8.04519	8.92151	10.2766	5.21342	6.79617	6.12354		4.51985	4.10372	2.31342	3.67177	6.48303	6.22769	8.19691	4.81457	5.01495	5.6238
8.33586	4.45202	7.41227	4.34929	11.5942	6.30147	6.2875	8.86248	5.61118	12.8935		1.0705	1.06223	1.02622	1.10744	1.15875	1.02822	1.51371	1.02183	1.09192	1.00998		2.51928	8.9481	7.28412	4.1649	8.15295	9.0018	10.2598	5.29674	6.96357	6.1509		4.55032	4.15592	2.37031	3.68443	6.50022	6.24748	8.24713	4.79244	5.13132	5.62084
8.35214	4.52956	7.33699	4.38678	11.5693	6.39828	6.28635	8.87242	5.67823	12.9217		1.07757	1.06627	1.02232	1.10367	1.14574	1.02819	1.47162	1.01897	1.09171	1.01342		2.3477	8.94703	7.37264	4.12804	8.17818	8.94503	10.5979	5.34019	7.0038	6.28112		4.57399	4.20279	2.34797	3.71382	6.51957	6.30302	8.0585	4.81047	5.09009	5.6272
8.54801	4.58331	7.49299	4.42408	11.568	6.33385	6.26853	8.87969	5.70381	12.813		1.06929	1.06299	1.02088	1.10834	1.19982	1.02876	1.53605	1.01825	1.09355	1.01078		2.44407	8.90032	7.30554	4.15603	8.20109	8.94907	10.4764	5.384	7.15953	6.31978		4.58398	4.37309	2.35139	3.73871	6.70628	6.27762	8.09581	4.89286	5.14478	5.62144
8.46888	4.676	7.43729	4.44566	11.5886	6.56812	6.30219	8.96872	5.7471	12.9793		1.06118	1.06294	1.02192	1.11145	1.16493	1.02552	1.55373	1.02236	1.09513	1.01244		2.46991	9.00142	7.24218	4.21694	8.23964	8.95835	10.6282	5.50035	7.18933	6.3408		4.69326	4.31838	2.36969	3.76821	6.65973	6.28657	8.32694	4.86524	5.01677	5.75411
8.48984	4.74603	7.42007	4.50582	11.6363	6.45917	6.31611	8.98485	5.81124	12.8886		1.06848	1.06856	1.02282	1.1091	1.18072	1.02545	1.55873	1.01844	1.09491	1.01164		2.45876	8.9738	7.23183	4.20117	8.34282	8.9639	10.8367	5.48625	7.31495	6.40984		4.70935	4.45644	2.36967	3.73777	6.86043	6.33559	8.14816	4.90273	5.01022	5.69483
8.57005	4.78482	7.41506	4.5256	11.6186	6.56107	6.35743	9.01409	5.83705	13.0527		1.07102	1.07111	1.02263	1.1119	1.1477	1.02583	1.53487	1.01876	1.09579	1.01183		2.68026	9.10432	7.27833	4.22461	8.39279	8.86954	10.5644	5.49708	7.41384	6.56363		4.71456	4.36264	2.3713	3.85389	6.88148	6.35832	8.09744	4.92858	5.05693	5.77456
8.49406	4.85606	7.53081	4.56198	11.5615	6.69872	6.33637	9.06358	5.84971	13.0787		1.06784	1.06723	1.02615	1.10753	1.14551	1.02226	1.53819	1.0206	1.09683	1.01445		2.55504	8.91398	7.25966	4.2872	8.46887	8.89865	10.8251	5.59694	7.45651	6.64841		4.77307	4.28833	2.36853	3.98592	6.99511	6.32972	8.24399	4.96489	5.0198	5.81653
8.64606	4.90148	7.47069	4.59662	11.5441	6.80033	6.44107	9.01868	5.93743	13.0034		1.06983	1.06969	1.02029	1.11067	1.19121	1.02745	1.4815	1.02192	1.09559	1.01458		2.55415	9.07822	7.33301	4.38445	8.54429	8.90203	10.8142	5.60188	7.52154	6.70676		4.83295	4.34701	2.40595	4.15877	7.07733	6.31128	8.21527	4.97494	4.90069	5.7124
8.69236	4.97534	7.49989	4.63866	11.536	6.67668	6.42003	9.09699	6.0003	12.9574		1.06756	1.06604	1.02685	1.11201	1.19196	1.02345	1.52285	1.01845	1.0959	1.0129		2.66092	9.16706	7.06881	4.35014	8.62558	8.99626	10.9378	5.63975	7.67649	6.83785		4.84118	4.25475	2.3903	4.17168	7.17494	6.36056	7.92501	4.88331	4.99441	5.80511
8.47934	4.99235	7.68772	4.64963	11.5395	6.73316	6.48099	9.08845	6.01222	13.256		1.06229	1.06809	1.02277	1.10667	1.14812	1.02676	1.50981	1.02165	1.09622	1.01338		2.75159	9.17987	7.18847	4.29213	8.6866	9.23256	10.9234	5.72907	7.78761	6.83724		4.88439	4.29496	2.47056	4.18957	7.26857	6.36425	8.18876	5.0104	4.99495	5.85775
8.5007	5.08628	7.60003	4.69212	11.5754	6.77518	6.48487	9.08934	6.09889	13.2645		1.06941	1.07106	1.02434	1.10876	1.16829	1.02793	1.48897	1.02203	1.09396	1.0126		2.78572	9.21593	7.03349	4.39829	8.69818	9.06716	10.9386	5.73607	7.71946	6.94285		4.94602	4.29482	2.45432	4.14344	7.31029	6.36382	8.23764	5.00236	5.0881	5.88405
8.45025	5.13497	7.63185	4.71622	11.5586	6.92418	6.48257	9.13128	6.15447	13.071		1.07257	1.0724	1.02279	1.10602	1.16069	1.02659	1.50562	1.01866	1.093	1.01372		2.71265	9.40754	6.95555	4.37227	8.70629	9.13087	10.8763	5.72172	7.76881	7.04572		4.95092	4.48046	2.45012	4.13606	7.36843	6.44184	8.01396	5.08319	5.12181	5.82247
8.54457	5.16364	7.6591	4.75011	11.5502	6.94047	6.53046	9.10187	6.13163	13.1837		1.0714	1.0704	1.02201	1.10439	1.18887	1.0254	1.57265	1.02018	1.09378	1.0129		2.73399	9.28559	7.14526	4.46749	8.71254	9.03331	10.6916	5.77314	7.9224	7.04678		4.98765	4.41597	2.48365	4.11588	7.42713	6.36369	8.16911	5.139	5.46141	5.84726
8.43694	5.22081	7.66031	4.78251	11.5159	6.92148	6.55461	9.15224	6.1653	13.2209		1.05643	1.07393	1.02156	1.10233	1.16675	1.02414	1.52897	1.02103	1.09077	1.0133		2.84043	9.33626	7.23094	4.4309	8.77792	9.11527	10.8269	5.87019	8.10578	7.10515		5.03452	4.33396	2.49318	4.13487	7.48397	6.38311	8.3061	5.13923	5.33752	5.88005
8.54159	5.29759	7.77852	4.80997	11.5502	7.05252	6.59352	9.158	6.25377	13.3821		1.06656	1.06845	1.02328	1.09909	1.15163	1.0259	1.54292	1.01858	1.08947	1.01324		2.82304	9.15052	6.99953	4.71564	8.7847	9.14311	10.9162	5.86709	8.13755	7.28559		5.06125	4.42496	2.46848	4.14309	7.57791	6.45477	8.13713	5.17057	5.26828	5.90046
8.56411	5.3456	7.87252	4.83214	11.5519	7.06374	6.59045	9.15362	6.25182	13.2733		1.08059	1.07199	1.02652	1.09899	1.16155	1.03148	1.51848	1.02146	1.0882	1.01329		2.84359	9.28	7.17126	5.13132	8.83424	9.14878	10.7492	5.97106	8.29546	7.28515		5.10062	4.62598	2.48135	4.11624	7.59959	6.37961	8.09052	5.17834	5.39027	5.87038
8.50388	5.41472	7.88558	4.87049	11.5507	7.13266	6.62844	9.16454	6.31338	13.3948		1.07548	1.07322	1.0233	1.10421	1.17407	1.02547	1.57154	1.02169	1.08673	1.01235		2.9636	9.12863	7.12516	5.82266	8.86272	9.07203	10.9275	6.00364	8.34084	7.37248		5.16042	4.5878	2.48238	4.15025	7.60888	6.49191	8.2764	5.20805	5.42004	6.02632
8.5847	5.47503	7.81341	4.89213	11.5141	7.09756	6.62246	9.18605	6.39343	13.4272		1.06027	1.072	1.02581	1.10658	1.17529	1.02734	1.5278	1.01774	1.08587	1.01415		2.80028	9.09187	6.97842	5.92027	8.93055	9.14792	11.319	6.05156	8.41699	7.43035		5.17581	4.55706	2.48231	4.16154	7.68857	6.48922	8.17619	5.26207	5.45535	5.92091
8.61722	5.54703	7.88906	4.92333	11.5254	7.22987	6.67685	9.19399	6.35931	13.5808		1.06669	1.06913	1.02674	1.09894	1.16073	1.02804	1.50728	1.02202	1.08394	1.01385		2.80638	9.05583	7.0018	6.02168	8.96715	9.23986	11.2154	6.0352	8.58094	7.4668		5.20418	4.84273	2.52629	4.20027	7.6972	6.45989	8.02308	5.32031	5.33211	5.92395
8.57462	5.58183	7.83844	4.96766	11.5303	7.24535	6.65552	9.22306	6.37894	13.4694		1.06051	1.06918	1.02289	1.09659	1.19834	1.02832	1.53384	1.02089	1.08169	1.01386		2.92344	9.12236	6.96434	5.98623	8.98596	9.06892	11.1584	6.12056	8.74575	7.55316		5.26427	5.00162	2.48543	4.18485	7.81052	6.56726	8.23362	5.40562	5.50221	5.94033
8.55778	5.63533	7.95125	5.00536	11.4635	7.26987	6.70504	9.2412	6.46664	13.4007		1.06999	1.06932	1.02161	1.10231	1.18182	1.02449	1.5498	1.01832	1.08279	1.01215		2.83447	9.17558	6.8786	6.00214	9.01169	9.14723	11.2003	6.16085	8.91074	7.61272		5.24976	4.92895	2.49851	4.22043	7.79025	6.58566	8.22167	5.3854	5.26454	5.96426
8.51774	5.71099	7.90529	5.02241	11.498	7.3375	6.67188	9.24924	6.457	13.4873		1.07192	1.07068	1.01986	1.09571	1.16616	1.02603	1.48354	1.02163	1.08161	1.01351		2.90649	9.1319	6.80244	6.04175	9.07518	9.16108	11.0807	6.12163	9.10818	7.57379		5.31597	4.98147	2.5434	4.21496	7.90205	6.64011	8.02853	5.47988	5.27223	5.93979
8.49224	5.77861	7.8789	5.05371	11.4582	7.35377	6.62408	9.26531	6.49662	13.567		1.07192	1.0785	1.01484	1.0997	1.15767	1.02411	1.5085	1.02446	1.08065	1.01432		3.08715	9.11454	6.90237	6.10767	9.10945	9.13624	11.3143	6.22893	9.2213	7.69206		5.40709	4.80598	2.50872	4.29972	7.93201	6.61932	8.17905	5.48812	5.3015	5.86327
8.65396	5.82734	7.9549	5.09095	11.48	7.47541	6.68176	9.28631	6.56703	13.441		1.06857	1.07515	1.02007	1.09244	1.19089	1.02556	1.50842	1.01907	1.08041	1.01391		2.98892	9.33768	6.78504	6.18026	9.11144	9.1574	10.9402	6.2096	9.55188	7.75711		5.40054	4.82195	2.50756	4.26411	7.94175	6.61318	8.09857	5.47375	5.5639	5.92529
8.58204	5.88732	8.022	5.11442	11.448	7.38569	6.63924	9.30819	6.55503	13.4671		1.0689	1.07639	1.02496	1.09496	1.17477	1.02666	1.50297	1.02094	1.07951	1.01465		3.15329	9.29643	6.86372	6.29629	9.1147	9.06454	10.9296	6.3102	9.78457	7.74524		5.42116	4.78818	2.48955	4.27644	8.03535	6.64666	8.03146	5.46007	5.8581	5.98389
8.6895	5.89787	7.91202	5.1525	11.4659	7.45055	6.71411	9.31289	6.57702	13.4666		1.07095	1.07836	1.02136	1.09573	1.15877	1.02293	1.52573	1.02169	1.07827	1.01529		3.09804	9.29779	6.78518	6.30563	9.15404	9.15825	11.0988	6.33484	10.0394	7.82297		5.53234	4.75507	2.50711	4.32818	8.20377	6.62138	8.0117	5.51896	5.88139	5.91639
8.66795	5.96026	7.89765	5.19647	11.4516	7.50606	6.73144	9.30423	6.66146	13.4193		1.07912	1.07677	1.02522	1.09605	1.14321	1.02658	1.52808	1.02146	1.07623	1.01627		3.11643	9.49733	6.71253	6.34649	9.18854	9.04178	10.921	6.3852	10.0216	7.96016		5.52905	4.86415	2.49934	4.38524	8.17626	6.61944	8.08769	5.58033	5.82897	6.00206
8.64907	5.98455	8.20368	5.23923	11.4694	7.70881	6.69306	9.32418	6.67233	13.5781		1.07027	1.07791	1.02025	1.0999	1.18409	1.02394	1.49995	1.02184	1.07844	1.01686		3.09485	9.4815	6.85133	6.37823	9.22283	9.13296	11.756	6.39358	10.2256	7.97303		5.56676	4.97188	2.48337	4.33118	8.26804	6.65882	7.98474	5.59669	5.80298	5.88553
8.56708	6.03699	8.14068	5.24737	11.4674	7.49146	6.72722	9.33808	6.68578	13.7566		1.0615	1.07864	1.02826	1.09565	1.17821	1.02682	1.51321	1.02097	1.07686	1.01779		3.20136	9.39118	6.82312	6.48456	9.27031	8.9562	11.2972	6.47655	10.2208	8.00423		5.66551	5.12876	2.53324	4.39262	8.37074	6.68666	7.94207	5.56379	5.08819	5.94057
8.66745	6.09077	8.14163	5.2925	11.3976	7.47628	6.81199	9.32558	6.74547	13.5199		1.06523	1.07191	1.0214	1.09184	1.14203	1.02542	1.53334	1.02126	1.07783	1.01633		3.39785	9.53146	6.76974	6.62092	9.27923	9.02558	11.5406	6.50941	10.3769	8.15411		5.64481	5.06978	2.53783	4.37902	8.40894	6.61091	8.10767	5.58281	5.20312	5.9958
8.75974	6.16313	8.16956	5.33741	11.3954	7.44404	6.80147	9.31934	6.78282	13.4352		1.06988	1.07079	1.0216	1.09098	1.16116	1.03321	1.5107	1.02139	1.07774	1.0168		3.22392	9.58518	6.62168	6.68374	9.33005	8.93792	11.3008	6.49357	10.5334	8.14231		5.71994	4.99569	2.50396	4.4079	8.43676	6.72764	8.05513	5.59818	5.06661	5.94911
8.62369	6.22184	8.22603	5.35053	11.4243	7.48849	6.76943	9.32315	6.80275	13.6085		1.06434	1.06726	1.01984	1.09271	1.14789	1.03686	1.54328	1.02035	1.07935	1.01547		3.40868	9.33136	6.50256	6.80637	9.3519	9.00074	11.0125	6.54547	10.6463	8.21278		5.73758	4.97473	2.54526	4.37777	8.41855	6.72293	7.97279	5.62716	5.1749	6.01371
8.57078	6.30493	8.09738	5.39115	11.4268	7.64044	6.83027	9.37198	6.87453	13.6491		1.06447	1.06772	1.02232	1.09212	1.16004	1.03451	1.5475	1.02111	1.08062	1.01683		3.30737	9.30015	6.71668	6.83628	9.3935	8.93905	11.3042	6.65701	10.845	8.36052		5.75999	4.89192	2.50688	4.54524	8.42882	6.70923	8.00518	5.689	5.48368	6.04328
8.80171	6.35606	8.1819	5.43485	11.4209	7.63583	6.83369	9.37523	6.89169	13.5488		1.06167	1.07303	1.02483	1.09145	1.1491	1.04072	1.50547	1.02085	1.07864	1.01697		3.23895	9.44391	6.65314	6.96688	9.41647	8.90795	11.5883	6.7127	10.8865	8.36314		5.79186	5.12988	2.4999	4.5517	8.49018	6.74213	7.9829	5.63206	5.69661	5.91159
8.62723	6.39634	8.19407	5.44236	11.4526	7.70568	6.84185	9.39475	6.89567	13.6874		1.06891	1.06962	1.02219	1.09394	1.1521	1.04354	1.52993	1.02041	1.0802	1.01529		3.32927	9.41263	6.78177	6.9954	9.44848	9.02779	11.4243	6.69092	10.905	8.35269		5.83594	4.94862	2.50161	4.54198	8.52666	6.73099	7.9606	5.7495	5.44451	6.00138
8.77527	6.45996	8.11489	5.46733	11.4573	7.57454	6.82449	9.43857	7.01249	13.6323		1.06933	1.06638	1.02605	1.08758	1.16181	1.04411	1.53747	1.02063	1.08026	1.016		3.46585	9.18283	6.52889	7.08714	9.46172	9.01573	11.3544	6.78634	11.0717	8.5073		5.869	5.11891	2.55696	4.56867	8.60482	6.78608	7.94367	5.75971	5.48023	6.09248
8.81343	6.49883	8.12267	5.48664	11.429	7.61825	6.89091	9.48069	7.01163	13.5901		1.07108	1.07553	1.02613	1.09207	1.18164	1.04432	1.54426	1.02036	1.08032	1.01578		3.53451	9.12779	6.77675	7.0454	9.47888	9.02843	11.1385	6.8068	11.0527	8.54015		5.92253	5.19889	2.53059	4.66111	8.67154	6.81529	7.97138	5.80319	5.43693	6.09372
8.68892	6.54947	8.10384	5.52119	11.3926	7.71723	6.89436	9.47418	7.03624	13.6325		1.06986	1.07628	1.02615	1.08689	1.16344	1.04806	1.52407	1.02396	1.08033	1.01822		3.53107	9.15775	6.63041	7.21992	9.49771	8.92141	11.2727	6.84314	11.0744	8.58222		5.9804	5.13047	2.53197	4.62374	8.7488	6.75294	7.93926	5.90187	5.38377	6.03418
8.61799	6.58463	8.0485	5.54015	11.3556	7.70114	6.85991	9.47427	7.05227	13.744		1.06646	1.07175	1.02168	1.08645	1.14817	1.04508	1.52587	1.02139	1.08007	1.01516		3.5404	9.22599	6.67209	7.23324	9.52506	8.92384	11.2615	6.8128	11.3171	8.78474		5.96625	5.42464	2.56334	4.67455	8.73889	6.8127	7.89772	5.94302	5.42606	6.09012
8.70774	6.63104	8.22683	5.55038	11.3597	7.55274	6.89518	9.47915	7.04998	13.7585		1.07035	1.07282	1.02502	1.09222	1.18963	1.04808	1.54444	1.02051	1.07907	1.01734		3.55507	9.0644	6.61498	7.38752	9.51793	8.9611	11.2558	6.86797	11.4067	8.91139		6.01619	5.33326	2.58766	4.64774	8.7582	6.85635	7.95629	6.0234	5.4077	6.1627
8.66824	6.64932	8.19288	5.59168	11.34	7.669	6.92177	9.48667	7.06712	13.759		1.0774	1.0677	1.02248	1.08843	1.18528	1.04438	1.52765	1.02357	1.07657	1.01625		3.43344	9.07206	6.67355	7.43632	9.52583	9.03575	11.3703	6.96655	11.5617	9.03588		6.11572	5.33158	2.57882	4.68749	8.81835	6.83346	8.00875	5.96288	5.48729	6.08671
8.78188	6.68116	8.24723	5.60934	11.2884	7.58572	6.96685	9.46381	7.10238	13.7247		1.07552	1.06686	1.02534	1.08893	1.15573	1.04189	1.52847	1.02059	1.07925	1.01734		3.5666	9.36304	6.39541	7.42441	9.512	9.13999	11.1616	7.00402	11.5623	9.22845		6.09093	5.35236	2.61852	4.69611	8.84553	6.79081	7.98044	5.97756	5.40483	6.03007
8.85831	6.71984	8.2131	5.62595	11.3065	7.71857	6.93797	9.49058	7.15636	13.8839		1.06558	1.06977	1.02171	1.08343	1.15097	1.04046	1.51733	1.02163	1.08277	1.01502		3.51921	9.27346	6.5879	7.54767	9.51372	9.11411	11.1664	6.98742	11.6111	9.27456		6.13874	5.3939	2.70152	4.68576	8.89436	6.80202	7.89913	6.11149	5.38735	6.16111
8.80919	6.76202	8.11656	5.64953	11.3515	7.60755	6.9229	9.46806	7.16643	13.9255		1.07514	1.075	1.0215	1.08287	1.16435	1.03977	1.56073	1.02392	1.08324	1.0169		3.38445	9.27521	6.46275	7.69337	9.5384	9.0928	11.2719	7.0969	11.6432	9.31169		6.23711	5.50326	2.60221	4.86019	8.94268	6.77612	7.95841	6.07292	5.75932	6.17312
8.71274	6.80185	8.16806	5.65447	11.3646	7.70976	6.91927	9.43531	7.20674	13.8698		1.06563	1.08106	1.02664	1.08803	1.15489	1.03839	1.52931	1.01962	1.08486	1.0166		3.79488	9.23764	6.63804	7.75473	9.56214	8.99868	11.5486	7.07329	11.7346	9.37902		6.21113	5.45952	2.57996	4.84929	8.9634	6.77491	7.92329	6.04769	5.66909	6.1365
8.70292	6.85442	8.23854	5.69346	11.3428	7.65659	7.00151	9.42876	7.25912	13.6975		1.0686	1.07806	1.02047	1.08358	1.15149	1.04048	1.51057	1.01972	1.08715	1.01822		3.64488	9.37069	6.40847	7.79104	9.63432	9.11189	11.2086	7.16486	11.8787	9.45152		6.24014	5.4149	2.62003	4.87756	8.99691	6.85384	7.92001	6.0797	5.52638	6.23502
8.67549	6.904	8.15255	5.70837	11.3828	7.7737	6.92742	9.45796	7.27956	13.7565		1.06181	1.08132	1.02638	1.08521	1.17105	1.04099	1.53046	1.02351	1.0903	1.01743		3.86885	9.35989	6.47042	7.98335	9.6867	9.2065	11.8189	7.20087	11.8587	9.35347		6.32611	5.69296	2.61196	4.95048	9.01547	6.82635	7.87732	6.07368	5.68562	6.21562
8.76079	6.92368	8.16786	5.7336	11.3351	7.78381	7.01407	9.38335	7.31674	13.793		1.06885	1.07791	1.02091	1.08544	1.13507	1.03659	1.49031	1.02062	1.0926	1.01917		3.71599	9.24231	6.37918	8.0448	9.67906	9.21247	10.9832	7.15065	12.013	9.5095		6.27624	5.4292	2.57497	4.91691	9.00061	6.81462	7.84358	6.12683	5.51384	6.13081
8.77195	6.98024	8.14531	5.75985	11.3227	7.73669	6.99593	9.42564	7.33818	13.8239		1.05867	1.07639	1.02643	1.07977	1.16732	1.03632	1.54862	1.02056	1.09502	1.0186		3.73327	9.27646	6.32731	8.08486	9.7217	9.11729	11.1959	7.14905	11.911	9.56725		6.34959	5.42447	2.6109	4.94795	9.08694	6.93387	7.81497	6.22047	5.57412	6.20711
8.77069	7.00534	8.17776	5.77821	11.3297	7.8875	7.00828	9.43953	7.4146	13.8367		1.05794	1.07292	1.02761	1.08097	1.14641	1.03859	1.53508	1.02291	1.09818	1.01829		3.81372	9.203	6.68697	8.17421	9.74389	9.11093	11.3135	7.2371	11.9745	9.60084		6.40695	5.52808	2.67499	5.03123	9.08716	6.93344	7.99662	6.20132	5.74004	6.22376
8.58993	7.05741	8.21109	5.82064	11.3111	7.97182	6.95066	9.4729	7.49618	13.8318		1.06753	1.07186	1.02319	1.08183	1.16593	1.03442	1.51067	1.0202	1.10104	1.01867		4.27198	9.14993	6.41641	8.35221	9.75976	9.01916	11.4413	7.27497	12.0819	9.75711		6.40173	5.72962	2.63036	4.99546	9.0909	6.89824	7.80304	6.22027	5.49549	6.2916
8.7623	7.10613	8.25418	5.84757	11.3336	8.00603	7.05092	9.45439	7.45098	13.7278		1.06935	1.07621	1.02543	1.08456	1.14913	1.03589	1.55191	1.02148	1.1014	1.01877		4.41072	9.30917	6.25626	8.341	9.7598	9.11658	11.4948	7.296	12.1864	9.73804		6.4245	5.61741	2.6049	5.04207	9.181	6.87083	7.75332	6.28921	5.45961	6.27319
8.54586	7.10741	8.40238	5.88029	11.3727	7.97597	7.02843	9.48901	7.5463	13.6934		1.07508	1.0757	1.02093	1.08542	1.16576	1.02978	1.57017	1.02297	1.10242	1.02008		4.53151	9.23403	6.18409	8.47371	9.80606	9.10656	11.363	7.34531	12.184	9.74309		6.49478	5.87581	2.63115	4.9929	9.08338	6.89913	7.92075	6.26789	5.68384	6.31356
8.67965	7.13329	8.25012	5.9033	11.3714	8.03303	7.04073	9.45955	7.60173	13.6842		1.06473	1.07684	1.02718	1.08548	1.15709	1.02838	1.53421	1.02143	1.10191	1.02009		4.46218	9.01998	6.66206	8.64824	9.84849	9.02866	11.4788	7.3485	12.2627	9.85097		6.50233	5.68174	2.66656	5.01089	9.15422	6.86126	7.92657	6.28442	5.70006	6.41305
8.6402	7.15508	8.24114	5.9293	11.3538	8.05387	7.03816	9.50889	7.65966	13.7988		1.07259	1.0807	1.02588	1.08668	1.13416	1.03301	1.51527	1.02206	1.10271	1.02042		4.53225	9.20242	6.52736	8.66646	9.83065	9.12213	11.585	7.40206	12.2262	9.94237		6.43188	5.76225	2.60505	5.07746	9.25771	6.87214	7.78782	6.27913	5.49103	6.31393
8.73144	7.16417	8.31687	5.9686	11.3776	8.0715	7.02471	9.52183	7.72271	13.6963		1.06638	1.07712	1.01948	1.08805	1.12677	1.02849	1.49537	1.02467	1.10335	1.01908		5.14819	9.27736	6.40809	8.78447	9.85708	9.04493	11.2787	7.42543	12.3393	9.96207		6.53597	5.88102	2.69359	5.21433	9.25904	6.82367	7.80675	6.26978	5.66683	6.39242
8.80319	7.19663	8.29931	5.99709	11.3525	8.07955	7.11433	9.56364	7.78371	13.811		1.07046	1.07656	1.02454	1.08375	1.18687	1.03118	1.52148	1.02426	1.1025	1.02209		5.28815	9.11281	6.50775	8.88121	9.87824	9.13237	11.7279	7.44256	12.3057	9.97694		6.52546	5.82332	2.62513	5.30963	9.28466	6.83101	7.88068	6.24533	5.791	6.36571
8.74716	7.24635	8.29129	6.00159	11.3178	8.16189	7.11303	9.57794	7.85668	13.7584		1.08488	1.07186	1.01954	1.08622	1.14419	1.03113	1.55766	1.02085	1.1006	1.02031		5.3586	9.19933	6.39629	9.0708	9.90149	9.00196	11.2089	7.4856	12.2984	10.0318		6.5198	5.68712	2.60063	5.31758	9.2504	6.86771	7.78519	6.26695	5.39833	6.4102
8.83674	7.25436	8.37487	6.02704	11.3605	8.10609	7.10571	9.62384	7.84986	13.6468		1.06868	1.07264	1.01995	1.08455	1.16057	1.03054	1.57739	1.0227	1.10318	1.02182		5.29662	9.27075	6.59979	9.13393	9.91429	8.9912	11.5168	7.48239	12.3076	10.0328		6.5566	5.75043	2.64428	5.3748	9.34585	6.84611	7.87214	6.34792	5.66872	6.35016
8.74544	7.27968	8.23163	6.05659	11.3204	8.20122	7.11188	9.64894	7.93471	13.8206		1.07327	1.0738	1.0239	1.09066	1.1415	1.03248	1.45565	1.02389	1.10028	1.02265		4.9637	9.12418	6.21209	9.25261	9.91771	8.98486	11.5615	7.5882	12.3496	10.1781		6.61685	5.74986	2.66668	5.35889	9.33508	6.8398	7.84209	6.36514	5.54025	6.32591
8.70851	7.3087	8.3406	6.0771	11.2777	8.27558	7.10009	9.64519	7.96293	13.8795		1.07101	1.07458	1.02256	1.09031	1.13308	1.03127	1.52319	1.02128	1.09812	1.01962		4.32546	9.22959	6.4203	9.34958	9.91614	8.96916	11.6562	7.5831	12.4884	10.266		6.57856	6.07963	2.72253	5.40328	9.35923	6.88223	7.91003	6.3867	5.75413	6.33475
8.85663	7.34297	8.40009	6.11871	11.2424	8.38288	7.05803	9.67595	7.96173	13.9341		1.06631	1.0791	1.02439	1.09461	1.17528	1.0268	1.52919	1.02496	1.10045	1.02036		4.23384	9.45333	6.48542	9.4629	9.90771	8.8686	11.6517	7.61056	12.4198	10.2626		6.64105	5.84336	2.72195	5.45455	9.31754	6.84291	7.85262	6.44158	5.83841	6.29495
8.79444	7.35121	8.42043	6.13944	11.1904	8.30959	7.10622	9.64927	7.98352	13.9717		1.05517	1.08028	1.02548	1.09376	1.13421	1.02825	1.57454	1.02097	1.09967	1.02363		4.37253	9.4737	6.55892	9.6107	9.91394	8.84995	11.4278	7.62773	12.6238	10.4279		6.62113	5.83369	2.78551	5.42665	9.38567	6.85816	7.84551	6.41867	5.75714	6.30974
8.87033	7.37917	8.25859	6.15737	11.2284	8.38759	7.14811	9.64908	8.02294	14.0981		1.06149	1.07769	1.01902	1.0936	1.16454	1.02671	1.5555	1.02416	1.09602	1.02203		4.42014	9.39985	6.31296	9.6993	9.89808	8.85258	11.5784	7.6521	12.5779	10.4672		6.62673	6.03498	2.78925	5.51891	9.37557	6.89053	7.84622	6.53391	5.7409	6.31456
8.84074	7.4281	8.34063	6.19033	11.1884	8.42607	7.09408	9.65772	8.00913	14.0396		1.0767	1.07933	1.02019	1.09225	1.16353	1.02777	1.53975	1.02267	1.09644	1.02299		4.4062	9.61213	6.42773	9.91417	9.95265	8.93342	11.5624	7.64139	12.6654	10.4967		6.62142	6.36499	2.89331	5.51113	9.35118	6.81161	7.86551	6.49711	5.72795	6.33915
8.81278	7.45526	8.25186	6.19545	11.22	8.38334	7.13416	9.68128	8.07789	14.1209		1.07125	1.07516	1.02119	1.09571	1.13958	1.02616	1.53891	1.02434	1.09486	1.02163		4.4693	9.42184	6.33461	10.0211	10.0002	8.90966	11.4836	7.68233	12.5844	10.6865		6.63516	6.13823	2.80264	5.57069	9.45289	6.87593	7.87747	6.50273	5.77993	6.34917
8.81338	7.48232	8.21219	6.21291	11.252	8.41279	7.16317	9.65667	8.11937	14.1555		1.06889	1.0671	1.02517	1.10451	1.15647	1.02928	1.55763	1.02138	1.09257	1.02139		4.33574	9.38963	6.15921	10.1708	10.0031	8.82091	11.5672	7.71401	12.5972	10.7525		6.63608	6.25797	2.85654	5.59221	9.42015	6.9375	7.89715	6.62126	5.94879	6.34586
8.80072	7.52905	8.2651	6.23096	11.2541	8.51215	7.16381	9.66171	8.0716	14.1169		1.07045	1.07119	1.02194	1.10401	1.16264	1.02947	1.53217	1.0238	1.0936	1.02076		4.56426	9.65511	6.47194	10.267	10.0586	8.82942	11.5643	7.69514	12.5342	10.7267		6.64826	6.35504	2.84727	5.61654	9.51914	6.92523	7.76991	6.5952	6.00469	6.3439
8.71353	7.54549	8.36148	6.24094	11.2839	8.53592	7.15812	9.67898	8.10701	13.9501		1.06435	1.07071	1.02727	1.09093	1.17974	1.02766	1.56251	1.02429	1.08931	1.0207		4.62386	9.43619	6.16687	10.2839	10.1417	9.00739	11.4561	7.77528	12.5429	10.9284		6.74251	6.41201	2.80319	5.64563	9.5454	7.05156	7.87739	6.60055	6.14546	6.34886
8.70849	7.58942	8.31251	6.27921	11.2949	8.60059	7.15557	9.70505	8.21676	13.8902		1.07678	1.06911	1.02238	1.09728	1.15998	1.02781	1.51729	1.02417	1.08729	1.02133		4.58116	9.21101	6.45454	10.3765	10.1735	9.00111	11.5523	7.7677	12.7473	10.8617		6.61934	6.45034	2.80984	5.72369	9.65159	6.97715	7.78219	6.65655	6.03629	6.31888
8.82077	7.64025	8.31376	6.27729	11.2843	8.63712	7.14567	9.71632	8.20847	13.8769		1.06839	1.07589	1.02094	1.09851	1.15797	1.02513	1.5675	1.0229	1.08526	1.02149		4.49065	9.28842	6.22166	10.4768	10.1669	9.07661	11.5888	7.81644	12.7406	10.8365		6.67106	6.33538	2.80977	5.77255	9.65258	7.04364	7.81908	6.54625	5.82591	6.33325
8.67792	7.65751	8.45178	6.28303	11.2921	8.74732	7.14739	9.70727	8.21909	14.0249		1.06241	1.08174	1.01956	1.09223	1.17209	1.02455	1.56807	1.02111	1.08386	1.02314		4.86362	9.35299	6.16655	10.5169	10.1993	9.07606	11.7167	7.8025	12.6811	10.9609		6.68694	6.28326	2.81919	5.79052	9.54832	7.06745	7.96133	6.69502	5.97017	6.36313
8.76971	7.70596	8.22777	6.3175	11.3187	8.60359	7.14863	9.69652	8.28273	14.0743		1.06288	1.08078	1.02595	1.09271	1.14039	1.0272	1.54221	1.0254	1.08331	1.02175		4.72828	9.25595	6.31401	10.6527	10.2479	8.97137	11.4962	7.77177	12.6351	10.9524		6.64688	6.47247	2.87092	5.82965	9.56414	7.04773	7.9285	6.61862	6.08439	6.2947
8.74748	7.75365	8.27046	6.32912	11.3185	8.7798	7.18198	9.70594	8.32783	13.9686		1.06015	1.08036	1.02331	1.09674	1.16035	1.02555	1.55684	1.0252	1.08248	1.02261		4.46201	9.17393	6.40021	10.7662	10.2157	8.9507	11.6154	7.87192	12.6143	10.8933		6.66218	6.15557	2.859	5.91598	9.63869	7.02749	7.92911	6.60952	5.65405	6.33993
8.8824	7.76619	8.45064	6.34643	11.3493	8.66492	7.21124	9.71285	8.34814	13.8445		1.06274	1.07669	1.02233	1.09842	1.17378	1.02885	1.5063	1.02502	1.08182	1.02107		4.60454	9.36003	6.56337	10.8737	10.1879	8.97521	11.9651	7.83359	12.6277	10.9142		6.73638	6.44895	2.87118	5.92149	9.66358	6.94029	7.89072	6.61732	5.8305	6.36783
8.67944	7.82726	8.40238	6.37584	11.2988	8.71701	7.17492	9.71906	8.41682	14.0074		1.06241	1.0789	1.02116	1.09871	1.17505	1.02588	1.52072	1.02495	1.08107	1.02468		4.6958	9.20708	6.33061	11.0136	10.1657	8.94088	11.8656	7.92281	12.678	10.9259		6.68637	6.49894	2.89008	5.94639	9.68642	6.97745	7.86832	6.74408	5.84916	6.39048
8.71185	7.88961	8.33778	6.39691	11.2827	8.86331	7.22341	9.75525	8.4351	13.8011		1.06463	1.08253	1.02283	1.10069	1.16973	1.02905	1.50712	1.02516	1.08223	1.02338		4.83475	9.19925	6.22466	11.0985	10.1787	9.05159	11.5853	7.97404	12.6497	10.9213		6.68477	6.61789	2.93411	5.95496	9.64062	6.93426	7.8725	6.72813	6.0566	6.44624
8.73166	7.89415	8.39696	6.42142	11.2631	8.90099	7.26228	9.73405	8.44094	13.7955		1.06916	1.08275	1.02659	1.09815	1.13924	1.02728	1.50065	1.0226	1.08151	1.0239		4.81948	9.45917	6.18334	11.1954	10.1689	9.06173	11.7551	7.93429	12.6506	10.9904		6.75796	6.44221	2.87078	6.01675	9.67582	7.00047	7.88238	6.73817	5.89849	6.45211
8.66357	7.93893	8.44534	6.4285	11.2091	8.8978	7.21839	9.75027	8.48661	13.762		1.05351	1.08009	1.02624	1.1045	1.13844	1.02905	1.59208	1.02583	1.07997	1.02584		4.85785	9.37563	6.47316	11.2297	10.1891	9.04856	11.5112	7.95907	12.763	10.9535		6.71379	6.58518	2.91545	6.053	9.72408	7.06736	7.91523	6.82275	6.10484	6.41704
8.64656	7.99529	8.25085	6.46257	11.096	8.90145	7.25567	9.79649	8.4631	13.953		1.06575	1.07808	1.02071	1.10243	1.14919	1.02939	1.52233	1.02542	1.08073	1.02426		4.65479	9.22114	6.22062	11.3404	10.2057	9.04155	11.3692	7.95688	12.7575	10.9147		6.73564	6.81808	2.96586	6.10445	9.70673	6.95168	7.9369	6.80868	5.79396	6.40106
8.68325	8.01149	8.37124	6.48432	11.0629	8.9318	7.25528	9.83398	8.49476	13.7757		1.07134	1.0811	1.02121	1.10439	1.11709	1.02968	1.50281	1.02513	1.07905	1.02337		4.79081	9.39122	6.29209	11.3877	10.2222	8.95899	11.7612	8.08994	12.8245	10.9594		6.81638	6.76004	2.90171	6.13341	9.7737	6.96709	7.89407	6.79765	5.74693	6.42475
8.63662	8.04373	8.356	6.52029	11.0221	8.93304	7.28904	9.83385	8.52043	14.0365		1.07065	1.08104	1.0158	1.10766	1.1637	1.02963	1.5702	1.02461	1.07724	1.02463		4.90332	9.41357	6.3837	11.5349	10.24	8.97674	11.3763	8.10287	12.8027	10.9029		6.74396	6.73565	2.86638	6.17776	9.75171	6.9282	8.05622	6.82653	5.95189	6.40081
8.74732	8.06126	8.35036	6.52794	11.0012	9.02968	7.30814	9.87209	8.54119	13.9538		1.06655	1.0805	1.01941	1.10806	1.16106	1.03259	1.53931	1.02472	1.07749	1.0228		4.96739	9.30054	6.44029	11.6174	10.2404	8.95611	11.7745	8.07551	12.7262	10.9467		6.73576	6.44136	2.9442	6.20149	9.7347	6.88647	8.00421	6.89227	5.91847	6.43455
8.65553	8.06737	8.33589	6.59227	10.9905	9.42611	7.29099	9.85257	8.59639	13.9718		1.06818	1.0799	1.02151	1.11057	1.12877	1.0299	1.57252	1.02742	1.07673	1.02561		4.6569	9.27193	6.43911	11.7102	10.2178	8.79095	11.4613	8.06072	12.7783	10.9266		6.78202	6.71125	3.06796	6.22192	9.89131	6.89616	7.85643	6.87924	5.94014	6.42924
8.72688	8.1017	8.26765	6.60731	10.9756	8.89707	7.26011	9.88031	8.63605	14.0768		1.07574	1.07868	1.02606	1.11515	1.15565	1.02858	1.53272	1.02413	1.07807	1.02415		4.77289	9.32169	6.51255	11.8143	10.206	8.79825	11.7732	8.08293	12.8575	11.0553		6.79411	6.53369	3.11835	6.22107	9.84209	6.92137	7.84484	6.87047	6.05458	6.42138
8.66598	8.11173	8.38547	6.62204	10.9836	9.05772	7.33133	9.92692	8.67657	13.9912		1.0739	1.08122	1.02318	1.11699	1.15788	1.02862	1.52239	1.0237	1.07804	1.02497		5.0454	9.44777	6.42567	11.8854	10.2135	8.73705	11.5346	8.08043	12.7895	10.9423		6.79933	6.72712	3.1547	6.2471	9.81298	6.97666	7.9454	6.97622	5.97337	6.39719
8.7064	8.14698	8.42398	6.64684	11.0082	9.46458	7.34646	9.92295	8.61725	14.1898		1.06634	1.07834	1.01856	1.11177	1.17394	1.02892	1.50187	1.02651	1.0777	1.02546		4.94278	9.21821	6.59108	12.0223	10.2019	8.69124	11.6744	8.08318	12.8995	11.065		6.84684	6.90638	3.09347	6.3247	9.90032	6.90897	7.95599	6.94017	5.91852	6.41069
8.59354	8.16116	8.38599	6.7188	11.0222	9.08389	7.34638	9.94757	8.6154	14.1324		1.07158	1.07742	1.02168	1.11708	1.13795	1.02613	1.53379	1.02401	1.07793	1.02418		4.77354	9.45768	6.24694	12.0849	10.1818	8.69291	11.667	8.08053	12.8505	11.0024		6.81608	6.9543	3.15518	6.53602	9.80731	6.87636	7.85098	6.91848	5.90552	6.51784
8.52054	8.16965	8.33741	6.72827	11.0201	9.11348	7.339	9.95887	8.63572	14.1046		1.06322	1.08126	1.02273	1.12383	1.16059	1.02847	1.56991	1.02562	1.07796	1.02661		5.20633	9.40808	6.42947	12.1507	10.224	8.65156	11.7935	8.22672	12.9639	11.0463		6.81029	6.6434	3.16192	6.67827	9.86352	6.85884	7.93715	6.90561	6.03589	6.30422
8.5868	8.21395	8.34629	6.78063	11.0101	9.30069	7.29236	9.94645	8.63888	14.2061		1.06725	1.07625	1.02021	1.12553	1.13882	1.03008	1.56035	1.02668	1.07741	1.02623		5.14798	9.2067	6.31407	12.2278	10.2935	8.66178	12.0745	8.19601	12.8813	11.1312		6.84548	6.75998	3.26202	6.85811	9.88119	6.85199	8.05882	7.00163	6.09886	6.38273
8.52254	8.23849	8.49305	6.77594	11.0713	9.26264	7.36857	9.95806	8.51194	14.169		1.06362	1.07465	1.0189	1.12569	1.16748	1.02678	1.54746	1.02374	1.07583	1.02452		5.18299	9.3674	6.50495	12.2721	10.2825	8.56714	11.5561	8.21407	12.8506	11.1111		6.81306	7.00977	3.28388	6.85191	9.9404	6.88719	7.94881	7.01342	6.10601	6.39919
8.51969	8.29072	8.37781	6.76759	11.111	9.16083	7.32055	9.95458	8.66947	14.0899		1.05936	1.08467	1.02204	1.12381	1.18846	1.02841	1.50893	1.02339	1.07614	1.02351		4.9768	9.41289	6.49548	12.3931	10.3024	8.71089	11.6912	8.20792	12.8406	11.0081		6.80445	6.67184	3.24698	6.79576	9.94044	6.82117	7.95469	7.13503	6.15862	6.3371
8.56648	8.30826	8.35697	6.8025	11.097	9.32348	7.36939	9.93915	8.66836	14.1101		1.07118	1.08371	1.02711	1.12465	1.16365	1.03017	1.54075	1.02607	1.0782	1.02622		5.01115	9.40523	6.61787	12.4393	10.2998	8.69336	11.9235	8.258	12.8595	11.1086		6.86622	6.74453	3.20917	6.83528	9.95511	6.92721	8.02506	7.18028	6.20384	6.34352
8.427	8.35347	8.46267	6.79536	11.1409	9.26368	7.37621	9.91702	8.63775	14.244		1.06061	1.07926	1.0235	1.12579	1.14227	1.02944	1.48422	1.02752	1.07665	1.02587		4.96753	9.43612	6.44819	12.3727	10.3271	8.60803	11.2947	8.25681	12.9734	11.1284		6.78103	6.83117	3.18883	6.80368	10.0467	6.89306	7.8748	7.20026	6.09767	6.39365
8.58136	8.38976	8.43944	6.79753	11.1332	9.12473	7.36667	9.9307	8.64235	13.9791		1.06423	1.08025	1.02022	1.12544	1.14391	1.02942	1.52062	1.02416	1.07623	1.02654		5.23412	9.6052	6.17831	12.5825	10.346	8.71077	11.5171	8.24561	12.9576	11.1339		6.83447	6.90403	3.18801	6.82352	9.97406	6.88321	7.86688	7.16465	5.98188	6.38994
8.58828	8.45704	8.37364	6.81022	11.1622	9.27667	7.39383	9.93599	8.73952	14.1095		1.06946	1.08252	1.0198	1.12258	1.14033	1.0309	1.55532	1.02332	1.07378	1.02584		5.30407	9.54619	6.46094	12.5906	10.3525	8.71739	11.3303	8.28635	12.8582	11.1838		6.86779	6.58115	3.20792	6.82904	9.99836	6.88598	8.00897	7.14073	6.08206	6.36772
8.6133	8.50066	8.40561	6.80569	11.1551	9.36457	7.39343	9.94455	8.66766	14.0714		1.07119	1.07699	1.02022	1.12671	1.15183	1.03174	1.58605	1.02618	1.07504	1.02729		5.20083	9.71413	6.47912	12.6754	10.3664	8.80609	11.7711	8.26857	12.8831	11.2563		6.86922	7.17884	3.1754	6.83044	10.0001	6.91908	8.02689	7.20993	6.13939	6.38857
8.621	8.54802	8.44953	6.84219	11.157	9.21042	7.41136	9.99472	8.68879	14.0444		1.07379	1.07812	1.02036	1.12563	1.14951	1.03263	1.53771	1.02656	1.07509	1.02886		5.42268	9.64725	6.3334	12.8423	10.3725	8.79553	11.654	8.31942	12.8567	11.209		6.8788	6.8802	3.2387	6.84216	10.0012	6.89505	7.81757	7.23566	6.11015	6.38129
8.72186	8.58161	8.37256	6.8434	11.1299	9.27892	7.38678	9.97889	8.74699	14.0584		1.08165	1.08241	1.01918	1.12481	1.13664	1.03018	1.5513	1.0271	1.07721	1.02716		5.41081	9.72277	6.32285	12.8906	10.4114	8.79974	11.6155	8.30204	12.9582	11.3567		6.89623	6.94496	3.19612	6.90011	10.0248	6.94638	8.01771	7.26842	5.98855	6.38271
8.53945	8.61761	8.42976	6.85003	11.1248	9.33764	7.40412	10.0035	8.73794	13.9109		1.05926	1.08353	1.01998	1.12521	1.15511	1.03539	1.56338	1.02653	1.07555	1.02944		5.38352	9.7568	6.76421	12.9788	10.4067	8.70033	11.4895	8.36832	12.9767	11.541		6.86473	6.96251	3.15592	6.9345	10.0365	6.87238	7.93633	7.19902	6.01339	6.39684
8.60702	8.59803	8.48737	6.86044	11.0878	9.29191	7.45251	10.0155	8.70756	14.0332		1.06287	1.08696	1.02047	1.12449	1.14612	1.03618	1.58177	1.02388	1.07764	1.02725		5.22178	9.67203	6.35024	13.016	10.4037	8.87195	11.445	8.2946	12.8414	11.4456		6.8894	7.1023	3.26184	6.94315	10.1149	6.89698	7.87564	7.21452	6.38594	6.37443
8.40125	8.63378	8.39561	6.87126	11.0269	9.30348	7.43013	10.0098	8.75654	13.9039		1.07822	1.08735	1.02498	1.12816	1.15358	1.03714	1.56064	1.02656	1.07961	1.0283		5.33246	9.77867	6.57423	13.0735	10.426	8.87995	11.5618	8.37988	12.9196	11.5824		6.90353	6.98207	3.18461	6.99111	10.073	6.92004	8.04941	7.18888	6.26208	6.33699
8.54855	8.66148	8.4141	6.89048	10.9481	9.35933	7.37098	10.0083	8.80443	13.9956		1.07306	1.08864	1.02142	1.12577	1.15482	1.0362	1.55578	1.02266	1.08327	1.02855		5.40953	9.80446	6.64776	13.1913	10.448	8.86096	11.6667	8.33163	12.9742	11.567		6.83018	6.91007	3.28082	6.98775	10.1004	6.92928	8.09117	7.30113	6.28256	6.24045
8.5418	8.69977	8.47319	6.90584	10.8921	9.36029	7.4821	10.0182	8.74506	13.8459		1.06616	1.0895	1.02455	1.12581	1.12574	1.03404	1.4985	1.0231	1.08505	1.02756		5.23935	9.78031	6.65048	13.138	10.4659	8.78845	11.4596	8.39992	12.8701	11.6086		6.87071	6.95251	3.24974	7.03469	10.0304	6.90461	8.01243	7.25898	6.52027	6.25649
8.63875	8.72461	8.32349	6.91544	10.837	9.30835	7.43302	10.0668	8.81949	14.0005		1.0652	1.08465	1.01975	1.12924	1.16245	1.0345	1.53731	1.02606	1.08717	1.02861		5.48453	9.62669	6.75937	13.2289	10.4673	8.87262	11.594	8.37084	12.9403	11.5973		6.91078	6.86725	3.20065	7.01733	10.055	6.93887	8.01009	7.35659	6.16217	6.2794
8.61513	8.76539	8.51809	6.91131	10.8628	9.31579	7.44649	10.0485	8.87816	14.0086		1.06621	1.08177	1.02394	1.12735	1.15765	1.03515	1.55618	1.02619	1.09073	1.02752		5.38195	9.60687	6.51862	13.2728	10.4905	8.76641	11.8068	8.38742	12.8266	11.6521		6.89093	6.83373	3.32002	7.05464	10.1529	6.91892	8.11266	7.25792	6.27813	6.26941
8.70629	8.75136	8.49228	6.95388	10.8262	9.3647	7.45984	10.0754	8.8963	14.0176		1.07228	1.07997	1.02302	1.12725	1.17503	1.0347	1.52659	1.02319	1.09546	1.02897		5.40162	9.51084	6.42612	13.3311	10.4863	8.75373	11.4227	8.40595	12.8339	11.5745		6.92044	6.88254	3.40668	7.10809	10.2681	6.9199	8.02028	7.33299	6.24915	6.22609
8.77871	8.71736	8.47976	6.94489	10.8039	9.30125	7.47533	10.0944	8.96562	13.9722		1.07401	1.07857	1.02013	1.12248	1.17476	1.03187	1.52306	1.02563	1.09816	1.02963		5.94851	9.43347	6.8486	13.3744	10.4965	8.64006	11.765	8.38406	13.0107	11.5687		6.95405	6.72599	3.60907	7.11696	10.1458	6.93597	8.2328	7.35218	6.46917	6.25137
8.49399	8.77023	8.44705	6.94826	10.8136	9.22833	7.48821	10.1051	8.94891	14.1246		1.06365	1.07927	1.02363	1.12426	1.17599	1.03378	1.55275	1.02747	1.09684	1.02703		5.65015	9.56651	6.54352	13.4602	10.5231	8.64056	11.909	8.46656	12.8656	11.5469		6.85091	7.34037	3.59527	7.13906	10.1838	6.916	8.24153	7.32866	6.29769	6.2854
8.57254	8.80945	8.52157	6.94632	10.8258	9.28985	7.51793	10.1299	8.89587	14.0366		1.07301	1.08072	1.02219	1.12885	1.14703	1.02959	1.50557	1.02314	1.09835	1.02824		5.42715	9.5421	6.85027	13.477	10.5401	8.60285	11.7562	8.42631	12.9316	11.5792		6.89139	7.11008	3.60894	7.12264	10.1686	6.8877	8.02609	7.30257	6.48015	6.25178
8.49171	8.76516	8.47649	6.97056	10.8235	9.19121	7.48605	10.1558	9.04607	14.2728		1.06433	1.0809	1.02022	1.12734	1.14563	1.02688	1.55988	1.0239	1.09896	1.03039		5.35416	9.59037	6.61851	13.5614	10.5323	8.52511	11.9145	8.41635	12.8874	11.5558		6.92735	7.46093	3.68867	7.22701	10.2452	6.94004	7.99344	7.28366	6.31306	6.20596
8.4695	8.77469	8.48865	7.00284	10.8695	9.27861	7.52479	10.1607	9.14485	14.3379		1.06696	1.0857	1.02299	1.12935	1.12029	1.02922	1.55166	1.02567	1.10113	1.03051		5.49369	9.43116	6.76697	13.668	10.5495	8.51426	11.697	8.46224	12.8866	11.591		6.90696	7.40196	3.80482	7.22154	10.2173	6.95161	8.12569	7.30115	6.43814	6.1836
8.66642	8.77254	8.51099	7.00965	10.8612	9.3472	7.55068	10.1654	8.9858	14.1646		1.06463	1.09014	1.02693	1.12427	1.15478	1.02889	1.5348	1.02555	1.10177	1.0288		5.4246	9.50633	6.67507	13.7149	10.5715	8.49573	11.7854	8.50693	12.9194	11.5493		6.92915	7.37751	3.82021	7.27065	10.2755	6.9216	8.25137	7.31975	6.28446	6.28338
8.54037	8.80754	8.36702	7.02799	10.8989	9.45028	7.5878	10.1923	9.05876	14.3174		1.06073	1.08869	1.0236	1.12919	1.11338	1.02611	1.57116	1.02563	1.10296	1.02928		5.65151	9.42629	6.78188	13.7213	10.5668	8.56899	11.3652	8.528	12.9911	11.5694		6.97493	7.17744	3.73441	7.34834	10.2588	6.9144	8.06894	7.37554	6.22311	6.30411
8.60859	8.78831	8.43935	7.03184	10.9378	9.42857	7.53519	10.151	9.2018	14.3107		1.07111	1.08606	1.02616	1.13101	1.12766	1.0292	1.59952	1.02703	1.10167	1.03094		5.7744	9.48662	6.72429	13.693	10.5936	8.54929	11.5189	8.51939	12.9725	11.655		6.91944	7.00403	3.65986	7.35166	10.3074	6.9207	8.11531	7.44783	6.16758	6.33312
8.81499	8.79825	8.4932	7.01771	10.9611	9.34721	7.58062	10.135	9.00778	14.1913		1.06221	1.08773	1.02022	1.13245	1.13961	1.02859	1.52119	1.02458	1.10328	1.03057		5.87039	9.26646	6.87225	13.7922	10.615	8.558	11.6235	8.55617	12.986	11.6873		6.95912	7.4104	3.55644	7.43314	10.2322	6.92675	8.38989	7.35982	6.45785	6.29076
8.65081	8.83272	8.48179	7.04909	10.9798	9.40414	7.56048	10.1688	9.00325	14.2074		1.07225	1.09131	1.02138	1.12736	1.14311	1.03028	1.5445	1.02622	1.10197	1.03067		5.77732	9.4562	6.85656	13.8212	10.6297	8.55472	11.7391	8.5343	13.1417	11.7902		7.00321	7.09638	3.52749	7.49795	10.2275	6.96324	8.22184	7.42952	6.21544	6.27566
8.64628	8.81009	8.44192	7.06429	10.9876	9.40283	7.58573	10.1572	9.18511	14.2137		1.05931	1.08817	1.02018	1.12827	1.12194	1.02669	1.52391	1.02895	1.10367	1.02955		5.96686	9.52491	6.80554	13.7838	10.6403	8.60863	11.4951	8.52662	12.965	11.8835		6.95897	7.44112	3.47082	7.52065	10.2507	6.96188	8.39781	7.42286	6.1586	6.32851
8.65185	8.8627	8.48781	7.06064	11.0173	9.33895	7.61356	10.1523	9.09579	14.2192		1.064	1.08577	1.01915	1.12821	1.15373	1.02753	1.54257	1.02283	1.10233	1.0305		5.79305	9.4748	6.73385	13.8248	10.6226	8.52217	11.7961	8.61768	12.9129	11.6826		6.98465	7.14744	3.49361	7.54391	10.2719	6.95631	8.42163	7.4376	6.15192	6.35343
8.65717	8.85279	8.50075	7.08041	11.006	9.41958	7.56862	10.1631	9.04249	14.1936		1.06863	1.09056	1.02458	1.1298	1.17623	1.02177	1.522	1.02371	1.09981	1.02924		5.90125	9.46283	7.0393	13.7476	10.5623	8.63311	11.5555	8.56996	12.905	11.8345		7.01835	7.4885	3.65851	7.59269	10.2935	6.95018	8.38774	7.40672	6.26234	6.37749
8.76913	8.87355	8.522	7.09913	10.9812	9.3904	7.61388	10.159	9.22938	14.1274		1.06415	1.08695	1.0267	1.12729	1.13912	1.02768	1.5454	1.02503	1.09765	1.0306		5.74485	9.5168	6.8907	13.7358	10.4903	8.64211	11.8741	8.59388	12.9311	11.7967		6.9917	7.32245	3.78878	7.56206	10.3552	7.01451	8.56937	7.44489	6.25579	6.22136
8.74534	8.86717	8.47905	7.09816	10.9979	9.3913	7.57853	10.129	9.21081	14.0661		1.06002	1.09067	1.01969	1.12719	1.16374	1.02693	1.51146	1.02534	1.0949	1.02947		5.93198	9.51592	6.65314	13.7718	10.4603	8.64022	11.5517	8.5858	12.9613	11.4656		7.00448	7.27616	3.81571	7.54601	10.2776	7.01816	8.49647	7.51244	6.2357	6.29252
8.60464	8.87846	8.4805	7.13361	11.0046	9.44425	7.60391	10.1152	9.0556	14.0107		1.06427	1.0923	1.02428	1.12779	1.16869	1.0268	1.56027	1.02426	1.09271	1.0296		6.23691	9.36838	7.03798	13.7914	10.4791	8.56906	12.3458	8.58359	12.9366	11.5795		7.04731	7.39902	3.80859	7.55023	10.3556	7.04438	8.45526	7.44222	6.13932	6.3336
8.63611	8.90948	8.44614	7.05346	10.9756	9.42241	7.6456	10.0792	9.19107	13.9874		1.06201	1.09287	1.01875	1.12885	1.14688	1.02396	1.54748	1.02495	1.09211	1.03124		5.94276	9.40207	7.04859	13.6856	10.4524	8.65045	11.8649	8.65043	12.8067	11.8167		7.00185	7.30992	3.89269	7.62847	10.2594	7.05975	8.42998	7.54593	6.14257	6.31406
8.6325	8.9123	8.47234	7.1094	10.9355	9.49474	7.66709	10.0775	9.17255	14.0582		1.0671	1.09618	1.02438	1.12466	1.15572	1.02296	1.55099	1.02535	1.08986	1.03116		6.05163	9.45192	7.0122	13.7275	10.4424	8.44632	11.6113	8.6586	12.8678	11.5269		6.98775	7.28028	3.91894	7.60662	10.3855	7.07266	8.45335	7.49034	6.33658	6.34128
8.63543	8.93658	8.43524	7.1221	10.8971	9.48911	7.68194	10.1113	9.10176	13.9413		1.06026	1.09635	1.01894	1.12536	1.12847	1.02363	1.54766	1.02526	1.0875	1.03111		5.98487	9.43093	6.90345	13.6663	10.4016	8.51452	11.6212	8.65246	12.8922	11.4975		7.03402	7.41397	3.87888	7.63184	10.3521	7.08696	8.48959	7.60082	6.19991	6.36013
8.61707	8.90859	8.62255	7.16631	10.8785	9.56163	7.70287	10.0722	9.12606	13.9184		1.06086	1.10082	1.02366	1.12168	1.16342	1.02548	1.54396	1.02448	1.084	1.03083		6.66476	9.47775	6.94003	13.6986	10.437	8.50982	11.7069	8.61513	12.9536	11.7325		7.04545	7.5906	3.94189	7.63249	10.3674	7.09284	8.53324	7.57449	6.27305	6.39177
8.73295	8.9166	8.57266	7.14707	10.8162	9.55474	7.66555	10.0729	9.1581	13.9834		1.05704	1.10535	1.02121	1.12594	1.13595	1.02468	1.50814	1.02829	1.08278	1.02953		6.55193	9.47354	7.3228	13.7377	10.5537	8.50322	11.7241	8.58705	12.8821	11.6191		7.02186	7.57896	4.08343	7.65699	10.3371	7.03655	8.56297	7.60998	6.57983	6.37703
8.73909	8.94163	8.54503	7.16307	10.7767	9.59487	7.7012	10.0992	9.13571	14.0323		1.06296	1.10236	1.02676	1.12751	1.13648	1.02431	1.58536	1.02421	1.08087	1.03313		7.32127	9.49737	7.17767	13.6991	10.5933	8.49771	11.5808	8.62411	12.955	11.4676		7.03659	7.53815	3.91394	7.75946	10.4236	7.11698	8.57259	7.51551	6.44083	6.3832
8.82819	9.09545	8.54701	7.19676	10.7553	9.50825	7.62824	10.0677	9.13614	13.9353		1.06871	1.09996	1.02408	1.12932	1.15165	1.02298	1.4982	1.02731	1.07895	1.03136		6.2633	9.59099	7.03457	13.6604	10.593	8.49877	11.1854	8.60626	12.9139	11.5283		7.05467	7.54881	4.04053	7.9302	10.3191	7.08208	8.53367	7.68623	6.48959	6.39004
8.64463	8.97901	8.48745	7.17838	10.7045	9.65791	7.66713	10.0429	9.19236	14.0263		1.06031	1.10047	1.02465	1.12471	1.14938	1.02106	1.56284	1.02572	1.07731	1.03267		6.41626	9.44235	6.90789	13.6495	10.5808	8.40378	11.8525	8.62841	12.771	11.5825		7.00623	7.64291	3.94673	8.13137	10.3773	7.05248	8.3877	7.67641	6.45733	6.45995
8.65976	9.16768	8.37083	7.20708	10.7116	9.52195	7.68191	10.0626	9.19823	14.0427		1.05754	1.09901	1.02206	1.12697	1.12619	1.02535	1.56792	1.02586	1.07709	1.03311		6.19347	9.64046	6.93649	13.6666	10.5921	8.50948	11.7562	8.62353	12.7716	11.6709		7.08211	7.50728	3.80139	8.32426	10.3601	7.05892	8.57633	7.67424	6.40095	6.37745
8.71537	8.99111	8.40674	7.22835	10.6867	9.51114	7.73093	10.0503	9.37798	14.0637		1.05914	1.09925	1.02516	1.13308	1.13438	1.02532	1.53863	1.02738	1.07595	1.03259		6.48178	9.83396	6.9226	13.6379	10.6008	8.47041	11.7708	8.67691	12.8101	11.8327		7.03446	7.54125	3.68315	8.33079	10.3742	7.11454	8.57762	7.56037	6.50063	6.37134
8.62587	9.15672	8.49392	7.22614	10.7487	9.50313	7.73671	10.0651	9.40844	14.1109		1.05751	1.0966	1.02096	1.12996	1.11698	1.02497	1.52979	1.02524	1.07463	1.03262		6.63424	9.75705	7.30388	13.5627	10.6044	8.45155	11.8446	8.60904	12.724	11.6635		6.99899	7.81212	3.8585	8.32706	10.4487	7.12472	8.57773	7.56785	6.64232	6.36691
8.77828	8.99642	8.59942	7.238	10.7248	9.47331	7.77088	10.0697	9.37015	14.0555		1.05432	1.0994	1.01795	1.1273	1.12033	1.02376	1.51348	1.02616	1.07624	1.03343		6.79129	9.64448	7.23757	13.6137	10.6393	8.38557	11.7854	8.62264	12.8093	11.6862		7.07068	7.68272	3.84879	8.3173	10.4173	7.14155	8.63818	7.66592	6.53953	6.21652
8.76234	9.20696	8.67606	7.26447	10.7261	9.48765	7.75636	10.0681	9.34506	14.0771		1.06643	1.09724	1.0234	1.12974	1.1411	1.02211	1.53972	1.02875	1.07453	1.03239		6.29791	9.68407	6.92477	13.5365	10.6382	8.46181	11.9844	8.63009	12.7814	11.9863		7.01459	7.55066	3.80361	8.2821	10.4115	7.11332	8.61466	7.67035	6.46881	6.24374
8.7117	8.99725	8.69294	7.24796	10.7297	9.60268	7.74342	10.062	9.43082	13.9789		1.0496	1.10171	1.02708	1.12431	1.12739	1.02324	1.47768	1.02653	1.07492	1.03312		6.81427	9.49985	7.10226	13.6324	10.6567	8.36038	11.611	8.63554	12.7716	11.9884		6.96895	7.79326	3.79403	8.27589	10.4755	7.15112	8.6434	7.7066	6.50062	6.25417
8.84353	9.24725	8.60307	7.26553	10.7516	9.56002	7.76426	10.0993	9.37667	13.9369		1.05729	1.10358	1.0257	1.12441	1.1321	1.02295	1.49246	1.02895	1.07444	1.03354		6.6873	9.53257	7.13436	13.5928	10.6182	8.44689	11.6952	8.6623	12.6934	12.0148		7.10337	7.60265	3.86774	8.24447	10.5062	7.15331	8.71668	7.68138	6.30106	6.17879
8.72941	9.04673	8.53689	7.28779	10.7542	9.49454	7.74582	10.0932	9.37377	14.0398		1.05594	1.10382	1.02144	1.12421	1.12839	1.0235	1.55524	1.02862	1.07432	1.03378		6.52952	9.59858	7.23175	13.5946	10.6515	8.42677	11.59	8.67217	12.7974	12.191		6.98528	7.47464	3.76259	8.26745	10.4602	7.05535	8.66314	7.70504	6.31082	6.22472
8.72509	9.22664	8.50911	7.30052	10.775	9.48087	7.77707	10.0541	9.47519	14.1715		1.0661	1.10545	1.02634	1.12116	1.16271	1.02168	1.56882	1.02578	1.0727	1.0347		6.62381	9.54037	7.12483	13.6222	10.6609	8.43755	11.3945	8.67367	12.7104	12.1303		7.04751	7.65078	3.77793	8.28292	10.4454	7.01327	8.66443	7.76392	6.45827	6.22111
8.74762	9.05907	8.63154	7.3063	10.8296	9.49865	7.7654	10.0191	9.46743	14.0242		1.06022	1.10894	1.02417	1.12388	1.1364	1.02125	1.53049	1.02816	1.07303	1.03485		6.49883	9.59256	7.0819	13.5086	10.6577	8.42441	11.4272	8.69238	12.8126	12.0714		7.01222	7.85196	3.81882	8.27195	10.4798	6.97805	8.72829	7.68834	6.42255	6.16226
8.80346	9.26129	8.66426	7.3091	10.8539	9.52777	7.77443	10.0255	9.47603	14.1394		1.0652	1.10753	1.02184	1.12234	1.14364	1.02208	1.51608	1.02607	1.07397	1.03337		6.95645	9.55514	7.29349	13.5082	10.647	8.3319	11.3766	8.66663	12.6972	12.2022		7.02374	7.76617	3.86098	8.29216	10.4791	6.90139	8.72893	7.7676	6.38525	6.17588
8.78636	9.04769	8.51518	7.34684	10.887	9.60439	7.80381	10.0282	9.51693	14.0436		1.06665	1.10424	1.01878	1.12116	1.14492	1.02118	1.494	1.02821	1.07332	1.03298		6.39961	9.64908	7.17372	13.4292	10.6448	8.32677	11.2585	8.65659	12.7861	12.1703		7.06121	7.69699	3.84584	8.3114	10.5139	6.98222	8.79244	7.79043	6.51339	6.22386
8.6089	9.23344	8.48485	7.33646	10.8878	9.54181	7.76929	10.0125	9.50071	14.0281		1.06173	1.10695	1.02511	1.12355	1.11245	1.02326	1.52119	1.02867	1.07412	1.03439		6.88263	9.62547	7.16549	13.4909	10.6736	8.31178	11.2581	8.6927	12.8024	12.0137		7.06917	7.87564	3.86698	8.31869	10.5109	6.94671	8.70789	7.69331	6.4524	6.3624
8.58153	9.04952	8.45867	7.31921	10.8855	9.56765	7.79446	10.0294	9.51052	14.1153		1.06966	1.11101	1.01979	1.12722	1.13131	1.01811	1.543	1.0284	1.07384	1.03393		6.89067	9.50367	7.18948	13.465	10.6706	8.23017	11.6284	8.64435	12.7121	12.0572		7.03971	7.83727	3.9596	8.36286	10.5167	6.90078	8.72924	7.75122	6.57208	6.38154
8.68903	9.22116	8.54803	7.3611	10.8834	9.6494	7.795	10.023	9.49869	14.1647		1.05923	1.10701	1.02687	1.1289	1.14312	1.0213	1.56704	1.02871	1.07358	1.0332		6.69273	9.63626	7.19208	13.4487	10.6681	8.30431	11.6437	8.64699	12.6877	12.0396		7.12021	7.70717	3.88682	8.37625	10.6295	6.91325	8.71991	7.74431	6.40039	6.27918
8.4476	9.03666	8.50036	7.31973	10.8638	9.61971	7.77654	10.0274	9.52446	14.1704		1.05766	1.10802	1.02782	1.12546	1.15484	1.02212	1.54726	1.02604	1.07198	1.03439		6.93111	9.53486	7.021	13.4705	10.6908	8.30198	11.5457	8.65891	12.6973	12.0479		7.14697	7.77384	3.82139	8.38376	10.5798	6.84241	8.80035	7.7249	6.51006	6.27909
8.75397	9.2536	8.55297	7.34244	10.8451	9.5696	7.85704	10.0375	9.51595	14.2175		1.0721	1.10583	1.02182	1.12448	1.14103	1.02063	1.52749	1.02909	1.06918	1.03474		6.80822	9.46949	7.16424	13.5135	10.7175	8.28451	11.7378	8.68689	12.6761	12.0018		7.08777	7.83572	3.76559	8.3957	10.5736	6.84569	8.82542	7.64296	6.47304	6.27262
8.77525	9.06395	8.46661	7.37421	10.8603	9.62857	7.87519	10.0306	9.5724	14.1554		1.06456	1.09855	1.02408	1.12193	1.14186	1.0224	1.54484	1.02862	1.06889	1.03397		7.30995	9.6306	7.0051	13.4369	10.7355	8.26137	11.8187	8.73199	12.7907	11.9801		7.12426	7.6763	4.03426	8.41033	10.5964	6.91692	8.82823	7.72272	6.52635	6.10597
8.71332	9.23086	8.54736	7.37809	10.8749	9.58165	7.86386	10.0638	9.58922	14.3038		1.07466	1.09837	1.02035	1.12154	1.14547	1.02163	1.53362	1.02699	1.07023	1.03402		7.25577	9.50798	7.08728	13.4732	10.7086	8.28447	11.6897	8.66022	12.8025	12.0303		7.21775	7.84672	3.93837	8.41195	10.5866	6.88086	8.71065	7.74229	6.83162	6.22527
8.54025	9.08662	8.61688	7.40628	10.8404	9.55987	7.92199	10.0698	9.63845	14.2332		1.06733	1.10683	1.0245	1.11932	1.12598	1.02	1.57935	1.02938	1.07026	1.03626		8.02454	9.64226	7.1629	13.5254	10.7061	8.26051	11.6606	8.68121	12.8295	11.9904		7.12397	7.59682	4.09871	8.42612	10.6627	6.92268	8.78898	7.64946	6.71387	6.24187
8.60252	9.24834	8.49208	7.39889	10.8508	9.58395	7.91264	10.0727	9.62083	14.2763		1.06576	1.11261	1.02555	1.12014	1.14419	1.02656	1.57782	1.02716	1.07092	1.03538		7.78315	9.58412	7.16469	13.4096	10.7081	8.26915	11.9456	8.69368	12.833	11.9127		7.11407	7.83053	4.12502	8.43708	10.5781	6.93132	8.73856	7.64983	6.71432	6.26022
8.62025	9.08543	8.51179	7.40163	10.7989	9.60094	7.91421	10.0678	9.63741	14.1975		1.07074	1.11291	1.02572	1.11594	1.12192	1.02568	1.52727	1.02917	1.06895	1.03508		8.61388	9.56661	7.14552	13.504	10.7039	8.2736	11.8599	8.69275	12.8262	12.0038		7.1706	7.93909	4.10281	8.48501	10.6165	6.90489	8.74265	7.62191	6.8006	6.30972
8.79943	9.25373	8.70175	7.40208	10.7722	9.61228	7.94455	10.0668	9.68538	14.0876		1.06908	1.11169	1.02455	1.11753	1.1623	1.02561	1.52464	1.02621	1.06784	1.03402		8.13003	9.53281	7.14907	13.4751	10.719	8.24197	11.7053	8.76935	12.7324	12.0756		6.97849	7.81694	4.09885	8.54354	10.621	6.90371	8.7384	7.71165	6.58813	6.39939
8.61703	9.11711	8.61663	7.44195	10.7367	9.57571	7.93981	10.0188	9.62223	14.195		1.06865	1.10912	1.0171	1.12178	1.12139	1.02833	1.52335	1.02659	1.06863	1.03466		7.78054	9.62401	7.26817	13.4206	10.7086	8.23749	11.746	8.7084	12.6857	12.0089		7.16879	7.92119	4.07806	8.54035	10.6928	6.88063	8.73028	7.74258	6.68664	6.31416
8.61683	9.28565	8.59459	7.4691	10.6966	9.68418	7.92948	10.0299	9.68387	14.0196		1.06543	1.1145	1.02016	1.1202	1.14267	1.02875	1.543	1.02628	1.07021	1.0362		8.33112	9.40661	7.34767	13.3842	10.7094	8.25561	11.8184	8.69585	12.7082	11.7464		7.32099	7.80937	3.94461	8.5465	10.7487	6.9036	8.75415	7.84687	6.72199	6.43867
8.69437	9.11067	8.60681	7.46092	10.6763	9.57989	7.97704	10.0022	9.73244	14.1133		1.07675	1.11349	1.02392	1.11683	1.12603	1.03041	1.56181	1.02989	1.07098	1.03527		7.38994	9.4298	7.2639	13.4416	10.7117	8.29887	11.6505	8.69402	12.7106	11.767		7.17111	7.81712	4.01755	8.55922	10.733	6.89277	8.95934	7.81185	6.70149	6.37557
8.68823	9.3315	8.62814	7.43281	10.6357	9.54436	7.96007	10.0297	9.66325	14.0559		1.07503	1.10876	1.02473	1.11203	1.10728	1.03225	1.57595	1.02714	1.07061	1.03531		6.92945	9.63349	7.39874	13.3911	10.6998	8.31338	11.7347	8.73083	12.5536	12.0044		7.09163	7.74093	3.92329	8.58301	10.6996	6.87311	8.81797	7.83024	6.63675	6.30672
8.54134	9.12733	8.61839	7.46689	10.6135	9.62566	7.92758	10.0132	9.66567	14.047		1.07693	1.10953	1.02082	1.11644	1.11516	1.03034	1.54053	1.02937	1.07124	1.03425		6.67787	9.46593	7.16651	13.4199	10.7022	8.2241	11.5891	8.71671	12.5401	12.2049		7.31179	7.97938	3.86825	8.62418	10.7251	6.8878	8.84534	7.91606	6.58643	6.32068
8.58456	9.30371	8.4956	7.45269	10.5981	9.51469	7.91676	10.0298	9.73863	14.1713		1.07861	1.10598	1.02668	1.1182	1.14255	1.03173	1.56737	1.03037	1.07138	1.03564		7.16732	9.48443	7.33352	13.3328	10.7047	8.22623	11.627	8.75894	12.5142	11.8077		7.23892	7.99351	3.70869	8.6519	10.741	6.88643	8.79901	7.845	6.51862	6.31876
8.66909	9.10831	8.50817	7.47352	10.5819	9.54272	7.9478	10.0783	9.7583	14.2658		1.08187	1.10407	1.02716	1.11067	1.15853	1.03184	1.54967	1.02897	1.07539	1.03574		7.82683	9.46487	7.26848	13.3944	10.6894	8.18815	11.9344	8.73964	12.4522	11.8404		7.03277	7.73267	3.70935	8.70138	10.7317	6.90507	8.82731	7.84462	6.68355	6.38638
8.52363	9.32011	8.45233	7.51333	10.5702	9.60549	7.96175	10.049	9.71481	13.9636		1.08179	1.09973	1.02313	1.11425	1.11271	1.03242	1.56123	1.02865	1.07489	1.03631		7.84914	9.47197	7.27027	13.2979	10.6927	8.1208	11.8051	8.72386	12.4708	12.1334		7.26848	8.00075	3.77718	8.72454	10.6684	6.87737	8.93557	7.78874	6.80007	6.34511
8.63271	9.08514	8.65912	7.49823	10.5599	9.52964	7.92794	10.058	9.79117	13.9985		1.07844	1.09987	1.02602	1.1145	1.15337	1.0317	1.58838	1.02897	1.07486	1.0364		8.06243	9.48364	7.12879	13.3092	10.7254	8.28867	11.766	8.73513	12.314	11.9437		7.22538	7.78433	3.84781	8.7236	10.6043	6.92141	8.84275	7.80872	6.78996	6.19759
8.71635	9.30296	8.59061	7.50957	10.5726	9.53445	7.94143	10.0285	9.826	13.9164		1.07544	1.09965	1.02064	1.10983	1.11127	1.03202	1.55276	1.02826	1.07772	1.03674		7.40615	9.44305	7.38678	13.2916	10.7087	8.21288	12.1054	8.77621	12.3866	11.8451		7.094	8.10087	3.91608	8.72935	10.6875	6.89988	8.88909	7.86392	6.75346	6.18411
8.72946	9.0843	8.6234	7.52312	10.5909	9.57037	7.92921	10.0251	9.79112	13.9687		1.08361	1.1056	1.01936	1.10899	1.12721	1.02843	1.57589	1.02818	1.07944	1.03672		8.7438	9.51169	7.49292	13.3232	10.7224	8.10398	11.5696	8.76477	12.4205	12.026		7.30356	8.17947	3.917	8.7468	10.7098	6.98219	8.91354	7.89426	6.91266	6.09911
8.57103	9.32673	8.60057	7.53322	10.6019	9.51018	7.93089	10.0088	9.84878	13.9182		1.07936	1.10623	1.01825	1.10887	1.15559	1.02867	1.55005	1.02842	1.07811	1.03704		8.43754	9.53272	7.34174	13.2817	10.7377	8.20573	11.7087	8.75315	12.4078	12.0887		7.32472	7.99816	4.06841	8.74188	10.7441	6.95048	8.89848	7.93123	6.69254	6.18473
8.61087	9.1165	8.65515	7.54798	10.6088	9.49245	7.91964	9.97893	9.83732	13.9578		1.07862	1.10278	1.01804	1.10937	1.12904	1.0278	1.5791	1.02847	1.08077	1.03657		8.16626	9.68608	7.54943	13.3166	10.7375	8.19519	11.9223	8.75668	12.4645	11.9735		7.16423	8.05633	4.15692	8.72966	10.6509	6.90551	8.88347	7.97877	6.71983	6.11247
8.68589	9.32928	8.57739	7.54923	10.6377	9.55307	7.89854	9.99702	9.8476	14.0219		1.08267	1.10501	1.01874	1.10923	1.12818	1.03085	1.53064	1.02753	1.08578	1.03587		8.48863	9.64061	7.19236	13.2226	10.7434	8.10498	11.5812	8.75921	12.5545	12.1571		7.23137	8.28049	4.23984	8.79077	10.6934	6.9595	8.85709	7.88465	6.7818	6.11368
8.54722	9.10344	8.54416	7.52664	10.6489	9.58358	7.93	10.0005	9.90188	13.9441		1.08186	1.11041	1.02098	1.11301	1.13633	1.0314	1.53364	1.02811	1.08455	1.03607		7.85414	9.58694	7.53796	13.1421	10.7316	8.25007	11.5186	8.74912	12.3455	12.2133		7.29253	8.30114	4.36245	8.84552	10.7259	6.96163	8.76835	7.92055	6.82621	6.05968
8.73511	9.37012	8.725	7.55257	10.725	9.5496	7.90557	9.98153	9.91317	14.0213		1.07334	1.10993	1.01997	1.1086	1.15211	1.03368	1.54081	1.02833	1.08742	1.03684		8.48637	9.60131	7.37486	13.2474	10.7343	8.24387	11.719	8.77524	12.3885	12.1152		7.17699	8.14944	4.38189	8.92361	10.6994	6.98905	8.91198	7.96159	6.92803	6.13002
8.57423	9.14462	8.60465	7.56096	10.7461	9.57004	7.93536	10.0361	9.86473	14.0167		1.0842	1.11542	1.01817	1.10967	1.14074	1.03141	1.54195	1.0285	1.08813	1.03675		7.8495	9.71364	7.64376	13.1512	10.7012	8.16014	11.7617	8.80506	12.4846	11.958		7.21364	8.26333	4.35416	8.90491	10.7296	6.98503	8.86291	7.9256	7.02132	6.18916
8.63155	9.24341	8.69833	7.54719	10.7954	9.57164	7.94395	10.0285	9.89313	14.0243		1.08749	1.1082	1.01838	1.10539	1.13532	1.03173	1.5899	1.02928	1.08721	1.03826		8.3607	9.69645	7.5964	13.1845	10.6761	8.14253	11.6906	8.85505	12.3085	12.1597		7.3154	8.23135	4.50694	8.96064	10.734	7.11552	8.94497	7.95664	6.8159	6.16478
8.59339	9.23601	8.59162	7.58714	10.8279	9.44163	7.94499	10.01	9.93018	14.005		1.08137	1.10827	1.01954	1.10892	1.12691	1.03104	1.56245	1.02896	1.08924	1.03794		7.93694	9.77456	7.4959	13.1057	10.7049	8.15402	11.7156	8.78942	12.4128	12.0956		7.23038	8.12293	4.48225	8.99727	10.8036	7.24099	8.86745	7.97584	6.80498	6.14689
8.71134	9.13269	8.66188	7.57372	10.8721	9.44519	7.96514	9.99587	9.9213	14.0408		1.07494	1.11282	1.02377	1.11055	1.14095	1.02966	1.56415	1.0301	1.08897	1.03687		7.50005	9.80476	7.35238	13.0584	10.7658	8.11593	11.779	8.81955	12.3515	11.8249		7.20957	8.11294	4.50981	8.96758	10.7537	7.13879	8.80923	7.99282	6.74813	6.0986
8.57119	9.35779	8.754	7.5881	10.8615	9.52975	7.9458	10.0286	9.87552	14.0306		1.0835	1.11619	1.02116	1.11033	1.11002	1.03087	1.54748	1.0298	1.08795	1.03727		7.61376	9.81185	7.30543	13.0022	10.7664	8.132	11.6905	8.87735	12.4709	12.0091		7.32189	8.11828	4.40691	9.067	10.6986	7.11116	8.94298	7.92361	6.77544	6.06506
8.69196	9.15911	8.67965	7.60084	10.8619	9.47152	7.96906	9.99691	9.9615	14.1965		1.08815	1.11199	1.02172	1.10883	1.15845	1.03008	1.55783	1.03068	1.08959	1.03803		7.35296	9.76742	7.28741	12.9275	10.7667	8.19444	11.9194	8.82885	12.4995	12.0875		7.21083	7.88822	4.39264	9.19791	10.6893	7.08575	8.93557	7.93359	6.7762	6.20758
8.65041	9.39383	8.651	7.5906	10.8453	9.47252	7.9332	10.0007	9.92808	14.0408		1.09163	1.10903	1.02612	1.10804	1.12337	1.02835	1.53303	1.03225	1.08961	1.03807		7.99101	9.72251	7.21024	12.9992	10.7777	8.11249	11.7885	8.85996	12.2795	12.0495		7.24361	8.15359	4.37673	9.39203	10.7338	7.02636	8.9016	7.95363	6.88172	6.1407
8.69806	9.1641	8.72722	7.58099	10.8616	9.42924	7.95209	10.0416	9.91875	14.0696		1.08704	1.10932	1.02656	1.10347	1.13116	1.0353	1.56405	1.0301	1.08702	1.03752		7.41197	9.70612	7.34759	12.9472	10.7583	8.13144	12.0454	8.88268	12.4004	12.0891		7.30606	8.09649	4.28402	9.57242	10.7408	7.06723	8.88072	8.00015	6.74168	6.06112
8.68737	9.32348	8.72621	7.61019	10.8337	9.4809	7.95514	10.0508	9.96353	14.1799		1.08091	1.10828	1.02103	1.11071	1.13095	1.02977	1.53823	1.03104	1.08643	1.03841		8.01613	9.67702	7.44142	12.9404	10.711	8.12237	11.8678	8.82925	12.3759	12.0287		7.26005	8.29788	4.24212	9.71477	10.7477	7.01612	8.92325	8.04397	6.73922	6.2577
8.68058	9.15262	8.75773	7.60199	10.852	9.39627	8.0014	10.0429	9.96355	13.9739		1.07446	1.10881	1.02333	1.11003	1.16476	1.03413	1.54649	1.03033	1.08548	1.03969		7.98849	9.6289	7.66335	13.0214	10.673	8.11672	11.7493	8.88618	12.3191	11.9639		7.25824	8.03033	4.27032	9.8658	10.776	6.99674	8.8985	8.04826	6.75387	6.10701
8.68361	9.34451	8.76142	7.62895	10.8573	9.3474	7.94034	10.0488	9.96781	14.075		1.08455	1.11147	1.0244	1.10967	1.13823	1.03273	1.60314	1.03114	1.08268	1.03818		7.97931	9.66327	7.16216	13.0074	10.709	8.1202	11.5888	8.86838	12.4041	11.9404		7.34718	8.21002	4.4142	9.88541	10.7863	6.93455	8.97385	8.02842	6.87324	6.16648
8.75472	9.11506	8.64379	7.62699	10.8123	9.39184	7.9906	10.0433	10.0437	14.2731		1.08134	1.10998	1.01881	1.10603	1.12544	1.03304	1.55406	1.0313	1.08365	1.0395		7.58142	9.66051	7.24016	12.9791	10.7434	8.13789	11.5336	8.8438	12.2965	11.9172		7.28981	8.14024	4.43325	9.89923	10.7493	6.93782	8.96443	8.01282	6.87652	6.20554
8.53832	9.35358	8.78429	7.63894	10.8069	9.37336	7.95208	10.0428	10.0288	14.0209		1.08254	1.10875	1.01892	1.1128	1.13771	1.02851	1.56399	1.03151	1.08185	1.03904		7.2704	9.63194	7.50732	12.925	10.7342	8.14458	11.6803	8.85715	12.3912	11.9833		7.2672	8.29895	4.40659	9.87728	10.7615	6.96973	8.90524	8.11721	6.86091	6.07377
8.5068	9.11933	8.79769	7.64891	10.7937	9.29822	7.99422	10.0255	10.0317	13.9876		1.08529	1.11042	1.01926	1.10983	1.12824	1.02642	1.57732	1.03002	1.08079	1.03959		7.79237	9.70175	7.61661	12.8992	10.7274	8.12125	11.9725	8.88288	12.3066	12.071		7.3569	8.34467	4.53492	9.89622	10.889	6.90882	8.92388	8.09468	6.99669	6.24213
8.56439	9.29932	8.68163	7.65137	10.7871	9.33754	8.01084	9.99064	10.0207	13.9541		1.09383	1.11048	1.02059	1.11719	1.17365	1.02176	1.50604	1.03068	1.081	1.04102		7.47485	9.59954	7.53239	12.9201	10.7025	8.11224	11.8722	8.94829	12.12	11.946		7.30639	8.35861	4.41047	9.88705	10.7916	6.93349	8.90435	8.05672	6.89334	6.12469
8.57079	9.11982	8.6351	7.67483	10.7638	9.33658	7.98239	10.0169	10.0688	14.0349		1.08474	1.11908	1.02415	1.11282	1.16342	1.01925	1.52073	1.03099	1.07999	1.0408		7.56314	9.71649	7.38582	12.8993	10.6554	8.12215	11.5045	8.90444	12.1598	12.0804		7.34976	8.17648	4.45768	9.88888	10.8071	6.93109	9.0488	8.0499	6.9289	6.3609
8.58639	9.33583	8.65065	7.67898	10.7031	9.3109	8.04948	10.015	10.015	14.0165		1.089	1.11819	1.02226	1.11956	1.1461	1.02223	1.52988	1.03249	1.07999	1.03944		7.53488	9.70318	7.49251	12.8508	10.6543	8.12298	11.6615	8.92604	12.0069	12.1833		7.39478	8.25732	4.34943	9.90683	10.7866	6.93562	8.87234	8.03777	6.96544	6.23048
8.52415	9.11263	8.64599	7.69325	10.6665	9.26974	8.02848	9.97429	10.0867	13.7512		1.08415	1.12109	1.01884	1.11361	1.14264	1.0206	1.57762	1.03178	1.07786	1.04099		7.31151	9.62251	7.46851	12.8296	10.6878	8.03529	12.0686	8.93345	12.0552	12.0436		7.30194	8.25193	4.35114	9.91007	10.8092	6.96886	9.00093	8.11002	7.12607	6.21381
8.66513	9.31612	8.71504	7.70422	10.6548	9.30018	8.05051	9.97094	10.0713	13.9495		1.09007	1.12388	1.02076	1.11386	1.15231	1.02084	1.54098	1.03432	1.07914	1.04136		7.53256	9.82395	7.41021	12.8534	10.7115	8.1255	11.7032	8.95844	12.0289	12.1514		7.31668	8.26588	4.40612	9.91538	10.7876	6.93459	8.90596	8.05246	7.10342	6.16728
8.72115	9.10469	8.73023	7.70119	10.5946	9.28886	8.06485	9.96822	10.0826	13.8976		1.07795	1.1183	1.02041	1.11403	1.13005	1.01834	1.57487	1.02914	1.07603	1.0401		7.09866	9.84348	7.51781	12.8504	10.746	8.12523	12.0681	8.96531	12.0939	12.2291		7.4074	8.29769	4.1626	9.89066	10.8999	6.95779	8.96505	8.02697	6.96582	6.10604
8.59926	9.24742	8.71653	7.69902	10.5719	9.27124	8.04507	9.93716	10.1129	13.9256		1.08405	1.11582	1.02409	1.1138	1.12117	1.02088	1.58211	1.03544	1.0789	1.04178		7.93822	9.66598	7.42619	12.7129	10.7401	8.14073	12.1102	8.98146	12.1093	12.2717		7.32322	8.40159	4.15895	9.8994	10.7936	6.88908	8.98186	8.0652	6.96418	6.1334
8.67095	9.13599	8.6804	7.7182	10.541	9.23262	8.09832	9.92881	10.1445	13.8083		1.08561	1.11695	1.023	1.11531	1.13528	1.022	1.56992	1.03599	1.07827	1.04145		7.15768	9.6014	7.48482	12.7137	10.7337	8.00323	11.8818	8.95721	12.0679	12.1706		7.33402	8.33419	4.10795	9.91996	10.858	6.82207	9.01207	8.03196	7.25533	6.05603
8.65605	9.35025	8.63725	7.72675	10.5519	9.24983	8.08327	9.91962	10.1145	13.9035		1.08963	1.11844	1.02599	1.11821	1.14159	1.02114	1.55749	1.0311	1.07754	1.0404		7.68381	9.61411	7.70594	12.656	10.7133	8.106	11.7341	8.99582	12.0343	12.211		7.40116	8.26626	4.14095	9.92451	10.8287	6.88115	9.03896	7.97904	7.04167	5.97801
8.71532	9.10988	8.71008	7.73489	10.5332	9.2147	8.08021	9.92537	10.1234	13.9362		1.08331	1.11604	1.02275	1.1183	1.11334	1.02399	1.56422	1.03458	1.0798	1.03997		7.27033	9.61923	7.3419	12.5646	10.6886	8.10441	12.1353	8.97988	12.2122	12.3553		7.29919	8.31129	4.19668	9.96242	10.9308	6.86804	8.95185	8.03112	7.26207	5.91782
8.81307	9.3346	8.75385	7.74066	10.536	9.22168	8.07905	9.88628	10.1376	13.9535		1.08132	1.11722	1.01736	1.12009	1.14906	1.02034	1.59398	1.03525	1.07804	1.04168		7.44786	9.67539	7.40412	12.5791	10.7164	8.12124	11.8513	8.95335	12.0155	12.2714		7.36519	8.33258	4.16562	9.97895	10.9174	6.87196	8.97089	8.07704	7.11595	5.97844
8.69772	9.09273	8.65944	7.73662	10.5234	9.24636	8.12154	9.92522	10.1417	13.9045		1.08441	1.11462	1.02382	1.11666	1.11139	1.02584	1.60498	1.03199	1.07923	1.04202		6.93063	9.49368	7.68142	12.5992	10.7041	8.10528	11.7363	8.98014	11.9749	12.2764		7.4644	8.11364	4.26166	10.0205	11.0076	6.95061	8.94462	8.08026	7.05827	5.93015
8.64298	9.23155	8.64095	7.76878	10.5183	9.26922	8.10952	9.88585	10.1973	13.9385		1.07966	1.11265	1.01904	1.12078	1.12251	1.02522	1.56565	1.03267	1.07933	1.04051		7.28587	9.6084	7.67262	12.5002	10.6908	8.08074	11.7843	8.9754	11.9429	12.3838		7.37795	7.99355	4.27066	10.0466	11.0444	6.91369	8.89847	8.02205	7.12339	6.11537
8.63451	9.10471	8.6113	7.79289	10.5196	9.23062	8.11704	9.86531	10.1955	13.8526		1.07722	1.11137	1.02378	1.11892	1.11452	1.02242	1.5447	1.03395	1.07983	1.04286		7.27094	9.68672	7.79428	12.4646	10.6558	8.12353	11.8445	8.97387	12.0791	12.262		7.35688	8.3423	4.27169	10.0688	10.9632	6.841	8.88354	7.95539	7.17554	6.15581
8.80039	9.30249	8.72612	7.77294	10.5193	9.25373	8.15738	9.9012	10.1612	13.8512		1.08055	1.11545	1.01769	1.11783	1.15702	1.0214	1.59204	1.0315	1.07818	1.04437		7.49511	9.60228	7.37623	12.4055	10.6942	8.11007	11.7122	8.96708	12.0148	12.389		7.43068	8.30148	4.38261	10.1104	11.0717	6.92062	8.93378	8.07015	7.11177	6.10628
8.62394	9.05622	8.70334	7.79136	10.5319	9.27895	8.14688	9.90574	10.1439	13.9798		1.07438	1.12327	1.02188	1.12043	1.15298	1.02447	1.58433	1.03317	1.07811	1.04507		7.6342	9.65412	7.51353	12.4776	10.6979	8.02528	11.5767	8.99808	12.1206	12.4427		7.37441	8.23714	4.37958	10.1393	10.9468	6.93794	8.99655	8.07182	6.94703	6.07683
8.7666	9.19881	8.79535	7.80056	10.5447	9.32	8.16327	9.8872	10.186	14.0465		1.08772	1.12254	1.01885	1.12302	1.12987	1.02978	1.58095	1.03605	1.07893	1.04465		7.61719	9.79194	7.47034	12.53	10.6783	8.12512	11.8382	8.99732	11.9977	12.2636		7.43177	8.15329	4.36624	10.1939	10.9376	6.897	9.07596	8.0035	7.00643	6.06098
8.6234	9.0919	8.67705	7.77457	10.5408	9.31502	8.15974	9.97154	10.1691	13.8754		1.08028	1.12406	1.02633	1.1213	1.163	1.02534	1.57281	1.03577	1.0766	1.04436		7.98673	9.61947	7.38454	12.4898	10.6461	8.01036	11.8679	8.94881	11.9024	12.2536		7.45855	8.31205	4.45823	10.2037	10.9111	6.95071	8.89894	8.04034	7.10938	5.94952
8.5587	9.13337	8.72874	7.78294	10.572	9.26634	8.2367	10.041	10.1811	13.9064		1.08436	1.12147	1.02031	1.11849	1.1637	1.02698	1.56648	1.03495	1.07614	1.04357		8.12209	9.59291	7.55046	12.4909	10.5961	8.124	11.9869	8.95312	11.9953	12.3952		7.3742	8.35846	4.31988	10.2457	10.8996	6.92	9.02897	8.07859	6.89352	5.97549
8.73684	9.1638	8.7468	7.78593	10.5925	9.31367	8.20931	10.0399	10.1392	13.9117		1.09174	1.1255	1.017	1.1225	1.16087	1.02799	1.60179	1.03585	1.07656	1.04427		8.65144	9.73535	7.70986	12.506	10.5934	8.11619	11.8296	8.91248	11.886	12.2921		7.45848	8.14074	4.30115	10.3017	10.876	6.95305	8.92905	7.98252	7.16866	6.09369
8.62023	9.09084	8.69379	7.81748	10.6147	9.32448	8.21209	10.0632	10.1621	13.839		1.08767	1.12791	1.02262	1.12523	1.15559	1.02728	1.60418	1.03573	1.0757	1.04446		8.98224	9.70246	7.67982	12.5029	10.6533	8.02178	11.9235	8.88997	11.9933	12.2565		7.4924	8.23748	4.24883	10.3444	10.8823	6.94706	8.95367	8.04017	7.06929	6.10291
8.58695	9.25764	8.71396	7.79691	10.6212	9.22706	8.2392	10.0406	10.1537	13.952		1.09045	1.12352	1.02312	1.12284	1.1466	1.02984	1.54644	1.03403	1.07534	1.04573		8.22926	9.71777	7.52884	12.5509	10.7324	8.11345	12.1447	8.9206	11.7305	12.2429		7.41897	7.98028	4.23652	10.3598	10.8286	6.90509	8.88823	8.13713	7.1631	6.1589
8.77864	9.03421	8.59271	7.81545	10.6177	9.29894	8.23395	10.004	10.1547	13.9183		1.08193	1.12466	1.01957	1.11837	1.10576	1.02863	1.56488	1.03317	1.07564	1.04626		7.79474	9.84741	7.48493	12.4782	10.7592	8.10892	12.0023	8.87683	11.8247	12.3925		7.43485	8.33056	4.23966	10.4014	10.8773	6.96859	9.05987	8.0637	7.06407	6.22758
8.51234	9.27688	8.74871	7.83203	10.6607	9.24238	8.23626	10.0751	10.0989	13.985		1.07695	1.12323	1.02547	1.12109	1.10533	1.02859	1.6145	1.0364	1.0746	1.04555		7.69774	9.86971	7.45261	12.5245	10.7839	8.18928	11.7033	8.86101	11.868	12.6453		7.5053	8.25753	4.28579	10.4553	10.7818	6.97966	8.8802	8.11144	7.13162	6.07238
8.59332	9.03647	8.72392	7.83105	10.6352	9.20578	8.2381	10.0369	10.1074	13.8024		1.08241	1.1171	1.02088	1.12643	1.12089	1.02865	1.58452	1.03347	1.0771	1.04541		7.7605	9.63457	7.6124	12.5123	10.772	8.06868	12.1761	8.85492	11.7676	12.2848		7.45933	8.40521	4.20669	10.4555	10.8899	6.97098	8.96799	8.14039	7.30852	6.14051
8.75025	9.21641	8.74397	7.83803	10.6381	9.16762	8.22827	9.9732	10.1402	13.815		1.0856	1.11308	1.01794	1.1212	1.12154	1.02459	1.6085	1.03747	1.0748	1.04485		7.75569	9.80945	7.73044	12.5777	10.7943	8.12537	11.6391	8.86327	11.666	12.3186		7.40629	8.39354	4.16407	10.4375	10.796	6.92974	9.02759	8.1663	7.04321	6.0893
8.62175	9.03586	8.89149	7.84553	10.6219	9.18844	8.26268	10.0165	10.1169	14.0588		1.08909	1.12081	1.01708	1.12598	1.13181	1.02697	1.57217	1.03669	1.07587	1.04695		7.7121	9.92649	7.70857	12.5383	10.8073	8.1076	11.6978	8.86694	11.7707	12.5881		7.51753	8.11999	4.37165	10.4757	10.8432	6.93842	9.03547	8.11035	7.20581	6.12554
8.6847	9.22525	8.60467	7.87446	10.6397	9.13451	8.25099	9.9789	10.1061	14.0615		1.079	1.12453	1.01737	1.11997	1.14609	1.02336	1.56697	1.03397	1.07663	1.0431		8.72632	9.84531	7.59482	12.5372	10.7677	8.08935	11.9977	8.87163	11.7304	12.1467		7.48997	8.26166	4.47188	10.5965	10.8402	7.00661	8.99611	8.13308	7.37176	6.06949
8.57237	9.03759	8.70426	7.88266	10.5967	9.07883	8.23499	9.92264	10.1844	13.9538		1.08448	1.12819	1.01962	1.12035	1.14914	1.02429	1.58919	1.03691	1.07465	1.04676		7.69044	9.72129	7.63482	12.4177	10.7747	8.10046	11.8826	8.90719	11.6981	12.1545		7.41171	8.23491	4.45321	10.622	10.8586	6.92789	8.98389	8.22892	7.12172	5.96411
8.6887	9.27323	8.66276	7.91154	10.6032	9.13849	8.21555	9.93146	10.1062	13.9006		1.08773	1.13242	1.01832	1.12238	1.15783	1.02375	1.55109	1.03699	1.0759	1.04684		7.83327	9.67254	7.71172	12.3707	10.7624	8.08564	11.7281	8.8964	11.72	12.5893		7.512	8.42164	4.56293	10.6425	10.7801	7.01861	9.07069	8.08901	7.25724	6.08258
8.61764	9.01242	8.84214	7.91471	10.6078	9.14283	8.19577	9.91364	10.1089	13.8497		1.09462	1.13169	1.01871	1.12535	1.14628	1.02455	1.5755	1.03756	1.07522	1.04525		7.71167	9.66023	7.68549	12.3274	10.7677	8.07207	11.7457	8.88898	11.704	12.3236		7.49123	8.2626	4.61978	10.684	10.8136	7.07935	9.02135	8.1866	7.15354	5.87438
8.55349	9.22411	8.75199	7.90311	10.5978	9.08931	8.25737	9.8725	10.1596	13.7955		1.08654	1.12614	1.0229	1.12419	1.15889	1.02367	1.57423	1.03694	1.07414	1.0461		7.91551	9.6654	7.45402	12.2584	10.796	8.05524	11.5921	8.93046	11.8108	11.8978		7.4433	8.38831	4.62752	10.6964	10.8749	7.00244	8.98738	8.09402	7.06992	5.82368
8.62529	9.03313	8.69237	7.92326	10.5713	9.09848	8.26968	9.91368	10.1724	13.8966		1.08137	1.12471	1.01653	1.12243	1.13968	1.02392	1.57237	1.03765	1.07819	1.0456		8.54268	9.59916	7.64143	12.2752	10.7799	8.05019	11.6131	8.92512	11.6878	12.1945		7.52674	8.44499	4.73548	10.7309	10.8849	7.08824	8.95453	8.10813	7.18569	6.04445
8.59195	9.22661	8.71336	7.93135	10.588	9.07747	8.28359	9.88315	10.1535	13.7379		1.0849	1.12566	1.01961	1.12411	1.14044	1.02078	1.56878	1.03735	1.07822	1.04671		8.06951	9.46856	7.39701	12.1825	10.7857	7.98844	11.6974	8.92975	11.6536	12.3733		7.53939	8.47674	4.72834	10.7366	10.8639	7.05056	8.93863	8.19697	7.1712	5.79069
8.71121	8.9894	8.68187	7.95965	10.538	9.05943	8.31265	9.85473	10.1514	13.8931		1.09256	1.12986	1.01655	1.12205	1.14189	1.02309	1.63115	1.03789	1.07663	1.04593		7.83967	9.6517	7.6773	12.2108	10.7901	8.08221	11.339	8.99407	11.7753	11.9971		7.4727	8.43412	4.88317	10.7455	10.8433	6.98619	9.09319	8.25165	7.06669	5.77559
8.53798	9.22635	8.79803	7.94408	10.5196	8.99316	8.29474	9.88278	10.1628	13.7214		1.08426	1.12352	1.02105	1.12022	1.14087	1.02261	1.56441	1.03733	1.07783	1.0458		7.53439	9.66821	7.76701	12.1554	10.787	8.04083	11.4608	8.92966	11.6893	12.0127		7.56818	8.24523	4.928	10.8048	10.8685	6.8981	9.03382	8.19875	7.29293	5.85832
8.56497	9.00014	8.79211	7.96675	10.5192	9.02792	8.31859	9.90599	10.1359	13.8613		1.08874	1.12461	1.01974	1.12036	1.12716	1.02165	1.57739	1.03702	1.076	1.04601		7.35285	9.50693	7.88939	12.0653	10.7739	8.06682	11.5226	8.95259	11.6646	12.4575		7.59174	8.23255	4.96232	10.8386	10.8655	6.95422	8.92432	8.25414	7.33377	5.95563
8.54103	9.20026	8.75972	7.96958	10.4769	9.0425	8.35188	9.85254	10.1644	13.7785		1.07506	1.12735	1.0192	1.12392	1.10986	1.02338	1.60206	1.0367	1.07513	1.04597		7.70683	9.50998	7.72203	12.0961	10.7836	8.06818	11.4311	8.94842	11.643	12.4331		7.45876	8.38791	5.01531	10.9265	10.9301	6.92482	8.93221	8.21473	7.17972	5.94807
8.47468	8.99547	8.64749	7.96411	10.4627	9.00072	8.32818	9.87271	10.1798	13.8098		1.08467	1.12399	1.0225	1.1289	1.13658	1.02503	1.65566	1.03691	1.07638	1.04765		7.48828	9.60403	7.57669	12.0148	10.808	8.07026	11.4373	8.96312	11.6259	12.1036		7.53107	8.27884	4.98596	10.9856	10.8816	6.8549	9.04042	8.21233	7.3961	6.02739
8.64414	9.17285	8.69287	7.97475	10.424	9.00305	8.33532	9.90778	10.1896	13.8203		1.08722	1.11922	1.01602	1.12694	1.14784	1.02286	1.60679	1.03745	1.07791	1.04597		7.87087	9.66149	7.72813	12.1063	10.7856	8.0819	11.3629	8.95683	11.6323	12.468		7.53395	8.51526	5.07184	11.0033	10.971	6.88624	9.00682	8.31206	7.29671	5.99492
8.6022	8.95925	8.56616	7.98876	10.4062	9.00923	8.34664	9.89728	10.2472	13.9708		1.08315	1.12555	1.02235	1.12926	1.12878	1.02394	1.58875	1.03621	1.07865	1.04673		7.66994	9.71354	7.71094	12.0298	10.7945	8.06606	11.7821	8.92251	11.555	12.6073		7.52004	8.29697	5.03559	11.0278	10.9024	6.9291	9.04671	8.19832	7.37086	6.06825
8.51368	9.2018	8.66367	7.99607	10.3856	8.98925	8.37734	9.94849	10.1912	13.8705		1.0949	1.12962	1.01676	1.13434	1.11239	1.02507	1.58527	1.04034	1.0805	1.04919		7.55918	9.75401	7.81355	11.9796	10.7979	8.08217	11.6903	8.95312	11.5572	12.3711		7.6218	8.37649	5.00159	11.0462	10.966	6.93776	9.00483	8.14738	7.12623	5.89917
8.58218	8.94803	8.6266	7.98888	10.3634	9.00334	8.39555	9.98462	10.2245	13.8771		1.08477	1.12939	1.01775	1.13075	1.11156	1.02523	1.59171	1.0354	1.07997	1.04774		7.27168	9.58401	7.77718	11.9261	10.7893	8.00212	11.5909	8.88941	11.53	12.6345		7.56937	8.36821	4.97039	11.0464	10.8742	6.88719	9.01574	8.15202	7.29194	6.06452
8.72242	9.10186	8.66346	8.01667	10.3509	9.03069	8.36346	9.92852	10.2409	13.8652		1.08813	1.12291	1.01903	1.13204	1.13176	1.029	1.58993	1.03938	1.08335	1.04885		7.65731	9.60984	7.75213	11.9595	10.7875	8.03797	12.0018	8.89647	11.4034	12.771		7.49639	8.0284	5.00507	11.0685	10.9574	6.92983	8.92685	8.24267	7.34749	6.03927
8.6887	8.92505	8.60864	7.99589	10.3375	8.96742	8.41447	9.95203	10.251	13.8139		1.08646	1.12326	1.01799	1.13306	1.13893	1.0308	1.5628	1.03625	1.08384	1.0487		7.71101	9.74771	7.78459	11.9073	10.7828	8.06269	11.6542	8.92564	11.4158	12.6316		7.57827	8.28344	4.98154	11.1419	10.9601	6.92263	9.11449	8.1251	7.0143	5.97702
8.60429	9.12324	8.61256	8.01869	10.3629	8.88601	8.37859	9.96205	10.1884	13.8981		1.09292	1.12196	1.01837	1.13277	1.10588	1.02727	1.60017	1.03656	1.08571	1.04748		7.68088	9.83399	7.77309	11.9198	10.7864	7.98864	11.7868	8.86928	11.4651	12.5856		7.62145	8.1579	5.02112	11.2971	10.8924	6.96969	9.09928	8.27556	7.04533	6.0409
8.52658	8.86911	8.62346	8.01145	10.3718	8.96504	8.36502	9.95491	10.2601	13.7889		1.08723	1.11833	1.01802	1.13912	1.08649	1.029	1.60254	1.04059	1.08945	1.04865		7.55484	9.67505	7.69831	11.9075	10.8042	8.03126	11.9605	8.85874	11.4748	12.7408		7.5138	8.58192	4.9465	11.4266	10.945	6.9904	9.01756	8.17614	7.09618	6.05305
8.56269	9.04247	8.55146	8.08218	10.3674	9.04852	8.40946	9.9434	10.2366	13.7339		1.07942	1.11622	1.01643	1.13756	1.12092	1.02628	1.63036	1.04081	1.08855	1.04812		7.57289	9.90119	7.69693	11.8311	10.8028	8.05163	11.4512	8.81469	11.4205	12.6885		7.61706	8.39592	4.93036	11.4941	10.9168	6.95119	9.00225	8.21307	7.21377	5.91847
8.61325	8.89805	8.78632	8.03265	10.3544	8.88026	8.41576	9.94087	10.2267	13.6642		1.0822	1.1129	1.01466	1.13618	1.1238	1.02517	1.58227	1.03831	1.0919	1.04939		7.68734	9.59718	7.68891	11.91	10.8025	8.05196	11.6999	8.7842	11.4344	12.442		7.62369	8.48673	5.04662	11.4938	10.9208	6.87535	9.03397	8.16957	7.02118	5.8788
8.60468	9.10255	8.62564	8.05213	10.3705	8.92395	8.39297	9.93328	10.3127	13.7755		1.08637	1.11792	1.01762	1.13757	1.13139	1.02438	1.60272	1.03784	1.09356	1.04923		7.2506	9.74619	7.56513	11.8002	10.8028	8.02948	11.6002	8.789	11.5138	12.3626		7.51173	8.18673	5.05344	11.5733	10.8628	6.93282	8.94532	8.27367	6.78379	5.85065
8.76752	8.87767	8.72852	8.06762	10.3527	9.05015	8.36055	9.92255	10.3276	13.709		1.0888	1.11868	1.01922	1.13541	1.13079	1.01901	1.58609	1.04303	1.09665	1.04885		7.82787	9.77735	7.80523	11.75	10.7844	8.04973	11.826	8.78824	11.464	12.2873		7.57238	8.44244	5.14205	11.6163	10.9938	6.89014	8.96841	8.18905	7.07526	5.96785
8.71589	9.08576	8.71912	8.0787	10.3624	8.94687	8.46276	9.94426	10.3412	13.6919		1.0895	1.11797	1.01552	1.13876	1.11778	1.02099	1.59111	1.03691	1.09913	1.05024		7.82596	9.7989	7.7236	11.7976	10.804	8.03603	11.9413	8.77348	11.4277	12.1152		7.59136	8.13503	5.13075	11.661	10.9318	6.85126	8.96891	8.18947	7.19581	5.89387
8.54359	8.84244	8.65962	8.10245	10.369	8.91234	8.41462	9.897	10.3385	13.6895		1.08504	1.11988	1.02022	1.14064	1.14009	1.02033	1.59408	1.03973	1.10002	1.04881		7.55508	9.84285	7.88312	11.7474	10.8074	8.031	11.7265	8.76496	11.353	12.1061		7.5437	8.17994	5.14206	11.6262	10.8405	6.86073	9.03655	8.24302	7.04841	5.9224
8.4584	8.9919	8.66464	8.07758	10.3564	9.00987	8.40712	9.91261	10.3437	13.7249		1.09259	1.11455	1.02269	1.13876	1.16042	1.02078	1.59837	1.03757	1.10146	1.04884		8.11421	9.93038	7.77171	11.7304	10.8111	8.02978	11.6619	8.79556	11.3481	12.0951		7.63298	8.26419	5.01987	11.5678	10.8844	6.803	8.92862	8.23225	7.06689	5.73608
8.69846	8.83379	8.69042	8.10877	10.32	8.88845	8.44244	9.87142	10.3311	13.6984		1.09339	1.11615	1.01828	1.13859	1.15259	1.02642	1.64621	1.03999	1.10133	1.04926		8.15855	9.84334	7.81635	11.7513	10.8215	8.10297	11.5862	8.8071	11.3366	12.0845		7.62754	8.51983	5.04502	11.5271	10.8356	6.86677	9.05271	8.18867	7.02888	5.89069
8.50564	9.02559	8.69486	8.12112	10.3281	8.80257	8.47257	9.83287	10.4094	13.6131		1.08833	1.11365	1.01406	1.13024	1.12147	1.02323	1.58953	1.04076	1.10101	1.05092		8.09796	9.99618	7.72466	11.687	10.8285	8.0306	11.8192	8.79111	11.4266	12.0059		7.55695	8.44578	5.12157	11.4928	10.9007	6.7733	8.93504	8.17155	6.76172	5.96016
8.44028	8.83253	8.63168	8.15523	10.3077	8.83402	8.47817	9.86777	10.4267	13.6884		1.09818	1.11133	1.01613	1.13661	1.15748	1.02455	1.60793	1.04003	1.10163	1.05072		8.11204	9.92079	7.9346	11.6782	10.8523	8.05729	12.0645	8.79709	11.2457	12.0436		7.66331	8.50099	4.94755	11.4739	10.9661	6.80963	8.96184	8.19945	7.05685	5.93593
8.5215	9.02873	8.65803	8.12201	10.2897	8.67834	8.47106	9.84195	10.4173	13.6513		1.08907	1.11446	1.01971	1.13706	1.12558	1.02611	1.62061	1.03741	1.0998	1.05022		8.2858	9.84269	7.7521	11.6493	10.8554	8.01508	11.7027	8.81297	11.2795	12.0272		7.60564	8.34367	5.00061	11.4485	10.9702	6.77818	9.02474	8.22999	7.10241	5.95609
8.73665	8.79597	8.67672	8.09253	10.3206	8.58953	8.50009	9.79877	10.4336	13.6715		1.09202	1.11038	1.02399	1.13918	1.13928	1.02725	1.66919	1.03891	1.0987	1.04974		7.98714	9.79198	7.84426	11.6418	10.86	8.01765	11.9373	8.8065	11.2335	12.0251		7.53164	8.5422	5.06519	11.4189	10.9606	6.75703	9.00157	8.24662	7.17661	6.03473
8.50694	9.00192	8.69693	8.14119	10.2764	8.6226	8.49998	9.81349	10.4701	13.5367		1.09388	1.10869	1.01831	1.12994	1.11908	1.02531	1.62657	1.03956	1.09886	1.04852		7.45369	9.81351	7.8512	11.6353	10.897	8.03808	11.725	8.83636	11.1441	12.0606		7.62536	8.08816	5.04331	11.4256	10.8804	6.76006	9.07803	8.21224	6.90603	6.01503
8.56328	8.79538	8.81064	8.14406	10.2947	8.56613	8.50668	9.80481	10.4154	13.805		1.10187	1.1121	1.02043	1.13178	1.13388	1.02653	1.63881	1.03822	1.0991	1.04935		8.09252	9.68017	7.52567	11.5922	10.878	8.02826	12.0191	8.86221	11.2734	12.0621		7.61548	8.57452	5.05319	11.433	10.9162	6.80068	8.85391	8.24496	7.23369	5.86947
8.49591	9.00385	8.74118	8.17468	10.2625	8.57301	8.53794	9.78215	10.4429	13.848		1.09877	1.10703	1.01502	1.13328	1.13152	1.0213	1.60722	1.04008	1.09981	1.04862		7.82958	9.84714	7.80462	11.5848	10.8857	7.9021	12.3286	8.86693	11.1496	12.0437		7.54311	8.181	5.27925	11.4392	10.9053	6.85913	8.9448	8.22137	7.23049	6.00141
8.68376	8.77758	8.69896	8.18193	10.2666	8.58957	8.59189	9.80559	10.4362	13.706		1.08619	1.10349	1.01663	1.13462	1.14666	1.02523	1.62993	1.03802	1.10016	1.04764		7.47195	9.85414	7.82855	11.6014	10.9144	8.01343	12.1437	8.88642	11.2392	12.0779		7.5941	8.24687	5.24154	11.4292	10.9746	6.8461	8.84964	8.23254	7.10222	6.06945
8.57925	9.00849	8.69617	8.19025	10.2669	8.52616	8.54733	9.8422	10.3676	13.7334		1.09005	1.10377	1.01462	1.13785	1.14142	1.02504	1.65049	1.04022	1.09665	1.04956		7.94386	9.55998	7.78005	11.5937	10.8989	8.01133	11.7226	8.88552	11.1656	12.1881		7.59466	8.5206	5.27186	11.4483	10.9864	6.87373	9.05481	8.15287	7.1443	5.93172
8.54905	8.7545	8.79774	8.19367	10.2551	8.55446	8.54251	9.82298	10.3646	13.6766		1.0894	1.10575	1.01532	1.14179	1.11544	1.02357	1.60069	1.04119	1.09622	1.04849		7.67093	9.69752	7.63618	11.5202	10.8801	8.00521	12.2641	8.91169	11.2303	12.143		7.54293	8.41794	5.34073	11.4436	10.9423	6.90207	9.02205	8.22428	7.17183	5.96952
8.67189	8.90216	8.78722	8.21242	10.2561	8.49319	8.5781	9.85498	10.3371	13.8062		1.09338	1.10344	1.02188	1.13671	1.12016	1.0242	1.65053	1.04085	1.09419	1.04828		8.02566	9.75205	7.81744	11.5186	10.8492	7.9793	11.8977	8.91435	11.1668	12.1785		7.61605	8.36431	5.28122	11.4259	10.925	6.89176	8.96346	8.17682	7.27763	5.99285
8.54128	8.74795	8.79507	8.20155	10.2311	8.55031	8.57154	9.84946	10.2698	13.5833		1.08424	1.10886	1.01865	1.1389	1.13815	1.0244	1.56312	1.04049	1.0927	1.04868		7.80225	9.71319	7.78632	11.492	10.7954	7.90993	11.9304	8.94301	11.2735	12.2183		7.6247	8.41974	5.37421	11.4196	10.8733	6.88538	8.95807	8.23624	7.38698	6.13022
8.71133	8.88749	8.84821	8.20818	10.1923	8.45356	8.52985	9.8502	10.2763	13.6988		1.08744	1.10998	1.01586	1.13521	1.14935	1.02456	1.63131	1.04071	1.08792	1.04868		7.84905	9.55471	7.65585	11.4357	10.7066	8.07664	12.074	8.93979	11.1411	12.2321		7.53391	8.54403	5.36641	11.4219	10.9179	6.93832	8.97098	8.19014	7.25554	6.05066
8.64873	8.70624	8.72578	8.23103	10.2037	8.49915	8.57757	9.87106	10.3238	13.7088		1.08087	1.10957	1.02006	1.14348	1.11401	1.02497	1.64853	1.0407	1.08774	1.04911		7.7857	9.62627	7.85289	11.4658	10.6792	8.06231	12.2887	8.94242	11.1184	12.3517		7.70209	8.63845	5.41329	11.4083	10.9687	6.96136	8.96311	8.23077	7.37689	5.98995
8.62707	8.86389	8.73846	8.21988	10.1885	8.49949	8.56604	9.8786	10.2881	13.5043		1.08233	1.10982	1.01788	1.14218	1.10866	1.02594	1.68643	1.04056	1.08277	1.0499		7.6725	9.58983	7.69963	11.3706	10.6466	7.99436	12.0803	8.99446	11.1492	12.64		7.64002	8.56124	5.43985	11.3807	11.0047	7.01047	8.90465	8.22039	7.40472	5.92783
8.64469	8.68946	8.69019	8.23732	10.1912	8.43268	8.58176	9.83341	10.3041	13.6953		1.09818	1.1109	1.0201	1.13694	1.11189	1.02382	1.63917	1.04068	1.08304	1.04913		7.73934	9.57713	7.89371	11.405	10.6028	7.97109	12.0274	8.94767	11.1176	12.452		7.56904	8.35833	5.33787	11.3691	10.9747	7.03165	8.96054	8.14687	7.48652	5.90296
8.51844	8.84263	8.84172	8.27231	10.1613	8.36366	8.52791	9.85674	10.3443	13.5904		1.09088	1.11158	1.01978	1.13484	1.12614	1.02232	1.63226	1.043	1.07957	1.0497		7.62542	9.60605	7.73526	11.3875	10.6199	8.04877	12.0365	8.95609	11.0343	12.4742		7.62645	8.37253	5.33488	11.3866	10.9374	6.99777	8.97102	8.13368	7.16145	5.9184
8.55302	8.70292	8.79735	8.28842	10.1638	8.41904	8.57748	9.88339	10.3312	13.6469		1.10077	1.10757	1.02197	1.1316	1.13575	1.02277	1.62175	1.04064	1.07792	1.05087		7.9203	9.76128	7.80631	11.3706	10.674	8.05153	11.8428	8.948	11.0992	12.6175		7.63532	8.32022	5.37001	11.3526	11.0224	6.96237	8.98804	8.16857	7.45276	6.00741
8.56001	8.91208	8.79506	8.30824	10.1588	8.4278	8.6004	9.82183	10.3834	13.6666		1.09831	1.10907	1.02195	1.12984	1.14383	1.02222	1.58085	1.04099	1.0774	1.0508		7.66111	9.72953	7.72963	11.2387	10.6992	7.9509	11.8798	8.91129	10.9886	12.4405		7.5598	8.46131	5.51049	11.3698	11.0389	6.99437	8.98658	8.22319	7.525	5.8408
8.67498	8.6756	8.79038	8.33932	10.1564	8.42262	8.62642	9.83504	10.4	13.677		1.08338	1.1126	1.016	1.13387	1.14341	1.02143	1.67118	1.04161	1.07597	1.0507		8.14119	9.88483	7.74944	11.203	10.7043	7.96284	12.2142	8.87655	11.001	12.3757		7.62767	8.26352	5.40345	11.3486	11.0094	6.96298	9.00217	8.24304	7.2625	5.71623
8.53239	8.91459	8.79018	8.37898	10.1137	8.26581	8.6462	9.83094	10.3875	13.7145		1.09521	1.11061	1.01793	1.13874	1.13068	1.02577	1.65236	1.04141	1.07533	1.04905		7.87494	9.97451	7.55356	11.0864	10.7218	7.87711	11.9257	8.88785	11.0548	12.5134		7.60365	8.34206	5.46766	11.3355	11.054	6.92723	8.96986	8.15537	7.59154	5.87167
8.40088	8.67455	8.71461	8.35388	10.1314	8.35709	8.61426	9.79261	10.4259	13.6887		1.09698	1.11033	1.02189	1.13797	1.14725	1.02017	1.624	1.0408	1.07471	1.05132		7.43445	10.0159	7.86164	11.0157	10.6875	7.97373	12.0415	8.87475	10.9751	12.3816		7.5532	8.47626	5.54175	11.3262	11.0285	6.93188	8.91637	8.1926	7.52145	5.8652
8.5319	8.83873	8.73318	8.37182	10.1136	8.40017	8.65524	9.79592	10.4438	13.4618		1.1012	1.10814	1.02042	1.13439	1.12431	1.01974	1.56119	1.04357	1.07364	1.05027		7.667	10.0744	7.49613	10.9202	10.7096	7.92447	11.5206	8.94638	11.0244	12.2448		7.67395	8.42737	5.51675	11.3196	10.9421	6.992	8.92715	8.30368	7.50583	5.86513
8.54107	8.64	8.69922	8.35843	10.0817	8.3171	8.64289	9.84023	10.4632	13.614		1.08942	1.10829	1.02096	1.12838	1.11586	1.01778	1.69194	1.03978	1.07417	1.04907		7.72599	10.125	7.72274	10.8358	10.7935	7.94539	11.8379	8.94485	10.9852	12.3929		7.62611	8.51929	5.50528	11.3435	10.9714	6.94402	9.01584	8.29306	7.3947	5.69566
8.52136	8.89202	8.64807	8.38093	10.0927	8.3276	8.6547	9.78391	10.4923	13.4998		1.09715	1.11449	1.02321	1.13264	1.14118	1.01821	1.60987	1.03997	1.07414	1.05132		7.84205	10.0709	7.78069	10.8219	10.8165	7.96765	11.92	9.00028	10.9528	12.2205		7.54619	8.46164	5.58092	11.3636	11.0335	6.97659	8.98226	8.19249	7.41054	5.72589
8.43559	8.63229	8.74133	8.38151	10.0733	8.2574	8.60711	9.81009	10.5007	13.6744		1.09138	1.11999	1.02199	1.12873	1.11739	1.01809	1.63402	1.04339	1.07496	1.0513		7.80668	10.0796	7.74015	10.8609	10.8307	7.87289	11.6278	8.98184	10.9439	12.141		7.58466	8.38725	5.53036	11.3426	10.9695	6.97613	8.9924	8.25897	7.26575	5.86424
8.38287	8.83886	8.65524	8.39557	10.0484	8.24359	8.62329	9.8349	10.4754	13.5477		1.09614	1.12061	1.01462	1.1319	1.13225	1.01999	1.60322	1.04056	1.07398	1.05131		7.78465	9.93669	7.80946	10.9226	10.8088	8.05183	11.6556	9.05983	10.9119	12.2282		7.56749	8.41501	5.59717	11.3625	11.0264	6.93097	9.04005	8.28656	7.23735	5.82897
8.73798	8.59871	8.70061	8.43331	10.0579	8.29616	8.59487	9.78261	10.5353	13.5554		1.09859	1.11284	1.01389	1.13583	1.13715	1.01782	1.6113	1.03952	1.07386	1.0522		7.48706	9.79839	7.87014	10.8614	10.802	8.00498	10.9277	8.98218	10.9256	12.2149		7.58424	8.25563	5.6014	11.3469	11.1074	6.98288	9.04867	8.25596	7.52862	5.73433
8.55224	8.77742	8.68821	8.39817	10.0628	8.35774	8.60173	9.79081	10.5601	13.6054		1.09587	1.11081	1.01831	1.13426	1.1394	1.01928	1.62548	1.04314	1.07236	1.05262		7.84607	9.82255	7.78494	10.8715	10.7957	7.98758	11.0965	9.00627	10.9816	12.1046		7.61678	8.39582	5.52391	11.3826	11.041	6.89356	8.91134	8.25637	7.44727	5.86083
8.57852	8.54164	8.7277	8.41052	10.0233	8.28295	8.62343	9.83976	10.5982	13.5752		1.09497	1.11005	1.01636	1.13633	1.13114	1.02537	1.6396	1.04241	1.07364	1.0515		7.9045	9.82797	7.88117	10.8532	10.7805	7.94909	11.388	9.02264	10.9322	12.2528		7.59127	8.50795	5.49139	11.3735	11.0604	6.9412	8.93505	8.22853	7.49337	5.84568
8.53111	8.69885	8.65884	8.47424	10.0194	8.23742	8.61936	9.77941	10.6476	13.533		1.09172	1.10883	1.02077	1.13476	1.13034	1.02306	1.66487	1.04126	1.07189	1.05127		8.11443	9.77824	7.63991	10.7991	10.7883	7.8709	11.368	9.04242	10.9409	12.157		7.50844	8.31482	5.45175	11.3851	11.0148	6.93417	8.9928	8.34997	7.43237	5.69705
8.49151	8.51857	8.70051	8.45373	10.0182	8.27361	8.64401	9.8153	10.6972	13.6168		1.09653	1.11029	1.0204	1.13355	1.1213	1.02372	1.64526	1.04327	1.07174	1.05225		7.58858	9.74367	7.7344	10.8739	10.786	7.90176	11.5595	9.03765	10.9956	12.0323		7.61713	8.38435	5.51218	11.3994	11.1091	6.88573	9.03912	8.30683	7.3741	5.79515
8.41186	8.65316	8.71815	8.4549	9.99805	8.24132	8.67233	9.81641	10.851	13.716		1.09976	1.10958	1.01818	1.1304	1.10133	1.02555	1.60581	1.0394	1.07187	1.05		7.32655	9.6573	7.67734	10.8601	10.7882	7.89851	11.4363	9.02218	10.9229	12.1076		7.64537	8.51247	5.50203	11.34	10.9986	6.91588	8.98765	8.31477	7.37523	5.72283
8.24408	8.51244	8.65334	8.46402	10.0168	8.18298	8.63767	9.74933	10.9446	13.5333		1.09415	1.10825	1.02192	1.13827	1.13433	1.02498	1.66812	1.0409	1.07154	1.05062		7.8707	9.71481	7.83851	10.8198	10.7569	7.9294	11.5365	8.98733	10.9653	12.1011		7.51452	8.37396	5.58037	11.3269	11.0366	6.82318	8.99814	8.31274	7.34332	5.74012
8.26078	8.62266	8.71174	8.43882	9.99368	8.20814	8.67558	9.77216	11.0004	13.4983		1.09733	1.11155	1.01805	1.13185	1.10087	1.02529	1.6018	1.04282	1.07208	1.05159		7.6539	9.77059	7.64201	10.7767	10.7575	7.89157	11.8162	9.02076	10.9035	11.9822		7.51703	8.55805	5.66927	11.3232	11.0745	6.88474	9.02471	8.26896	7.35628	5.73764
8.35409	8.48719	8.78607	8.44912	9.98807	8.22361	8.70224	9.78505	11.1229	13.4939		1.098	1.11603	1.02228	1.1343	1.14716	1.02614	1.61642	1.04083	1.07113	1.05135		7.78562	9.62031	7.85508	10.7959	10.7683	7.88651	11.7058	8.98548	10.917	12.061		7.59273	8.54186	5.75698	11.32	10.9843	6.84351	8.84526	8.27744	7.21174	5.69553
8.24081	8.62809	8.79519	8.48122	9.97865	8.19383	8.64111	9.72363	11.2524	13.7334		1.09978	1.11645	1.0192	1.13163	1.12522	1.02546	1.62394	1.0413	1.07057	1.05146		7.69531	9.65242	7.72003	10.7329	10.7773	7.88763	11.7186	8.95497	10.8815	12.1997		7.55789	8.33475	5.8178	11.3172	11.1005	6.83845	8.97655	8.35669	7.34624	5.83034
8.46175	8.44256	8.71762	8.46551	9.95272	8.18522	8.62872	9.73589	11.3254	13.4604		1.10745	1.11712	1.01815	1.13872	1.13151	1.02558	1.61408	1.04237	1.0695	1.05266		8.00528	9.62378	7.52363	10.766	10.7801	7.89664	12.0572	8.97947	10.8966	12.2658		7.62799	8.26538	5.84239	11.415	10.9711	6.76909	9.01365	8.16661	7.26631	5.82636
8.36676	8.59053	8.74331	8.50383	9.96433	8.19376	8.69424	9.76121	11.3024	13.4114		1.10343	1.11428	1.01679	1.13571	1.12185	1.02614	1.57731	1.04362	1.07044	1.05289		7.61393	9.62295	7.70268	10.7494	10.776	7.85722	11.953	8.97663	10.9052	12.2245		7.57907	8.63719	5.85025	11.5349	10.969	6.80212	9.03507	8.33039	7.49921	5.78957
8.62305	8.46115	8.60205	8.51821	9.92457	8.14503	8.63199	9.72184	11.3962	13.4907		1.09548	1.10789	1.01835	1.13893	1.12516	1.0263	1.55571	1.04042	1.07131	1.05139		7.98375	9.67523	7.53389	10.6958	10.7619	7.87542	11.9014	8.88659	10.8115	12.0321		7.62191	8.37088	5.99257	11.5611	10.9537	6.74529	8.97594	8.3285	7.45592	5.69797
8.18924	8.56913	8.74201	8.50905	9.92765	8.24652	8.67306	9.74769	11.3882	13.5522		1.0993	1.10553	1.01802	1.1376	1.1228	1.02782	1.64814	1.0438	1.07053	1.0523		7.58711	9.76411	7.72908	10.6866	10.7925	7.87453	11.7284	8.89192	10.775	12.4567		7.60561	8.57882	5.91347	11.5588	10.9261	6.80955	9.02766	8.20736	7.5655	5.75612
8.22347	8.41483	8.62002	8.5215	9.91676	8.24636	8.68283	9.73927	11.3293	13.5607		1.10811	1.11099	1.02153	1.13826	1.1283	1.02326	1.60011	1.04408	1.07409	1.05156		7.76738	9.73923	7.73518	10.678	10.7971	7.85941	12.0972	8.88102	10.8521	12.5883		7.61779	8.52087	5.86012	11.5759	10.9351	6.78479	8.92776	8.27205	7.46217	5.90691
8.47898	8.65378	8.80561	8.53801	9.927	8.19236	8.71616	9.69356	11.3857	13.4144		1.09417	1.11404	1.02053	1.13566	1.10187	1.01984	1.64039	1.04032	1.07224	1.0529		7.98396	9.83862	7.83549	10.6757	10.7737	7.90301	12.2735	8.81047	10.795	12.2567		7.55136	8.5028	5.91106	11.5807	10.9258	6.7501	9.02842	8.32268	7.55043	5.72483
8.44904	8.43569	8.83132	8.56356	9.89951	8.24043	8.70619	9.72346	11.3765	13.71		1.10339	1.11274	1.01895	1.12965	1.10998	1.01984	1.62891	1.04351	1.07189	1.05388		7.96324	9.80374	7.91239	10.6531	10.8084	7.88155	12.2466	8.81219	10.754	12.4895		7.63617	8.3263	5.97837	11.6658	10.9487	6.71015	8.90068	8.22732	7.5916	5.80783
8.44927	8.31524	8.73286	8.58772	9.88616	8.17518	8.80683	9.73767	11.3523	13.5525		1.10506	1.11231	1.02008	1.13464	1.15097	1.01814	1.65278	1.04044	1.07163	1.05399		7.8282	9.67838	7.56567	10.6603	10.8138	7.87687	12.3343	8.80652	10.7776	12.717		7.63701	8.49011	5.8771	11.6872	10.9792	6.81822	9.01329	8.33419	7.27164	5.79542
8.61704	8.35567	8.84173	8.59939	9.88092	8.24423	8.79975	9.71951	11.3545	13.5354		1.1066	1.10875	1.01481	1.13152	1.12532	1.01766	1.62407	1.04429	1.07083	1.05242		7.65946	9.81132	7.72845	10.5944	10.8055	7.87805	11.8755	8.84697	10.801	12.3516		7.57054	8.52059	5.93021	11.6306	10.9707	6.78121	8.97834	8.27687	7.3815	5.82487
8.37688	8.61453	8.77538	8.57289	9.8912	8.12069	8.84825	9.74227	11.3675	13.5818		1.10669	1.11128	1.02096	1.1306	1.13079	1.02077	1.64794	1.04077	1.06932	1.05345		7.55257	9.74976	7.59	10.6596	10.7979	7.89698	11.7495	8.79294	10.663	12.4434		7.59677	8.43153	5.88711	11.5779	10.8908	6.82003	8.9717	8.27642	7.76966	5.68035
8.53826	8.40275	8.73544	8.61453	9.86583	8.24029	8.8338	9.76727	11.3471	13.5633		1.10627	1.11198	1.01867	1.13626	1.13022	1.02107	1.63083	1.04305	1.07082	1.05393		8.15572	9.7333	7.87678	10.5742	10.8159	7.87373	11.8764	8.78379	10.7668	12.8217		7.62293	8.45739	5.94695	11.5761	10.9039	6.90708	9.00921	8.29086	7.74732	5.76244
8.3368	8.34705	8.7597	8.62083	9.84886	8.25411	8.87171	9.74141	11.3852	13.5553		1.10934	1.11537	1.02099	1.1355	1.13267	1.02622	1.63774	1.03962	1.07012	1.05442		8.17324	9.66319	7.7524	10.5624	10.8358	7.86231	12.0959	8.81494	10.7249	12.6334		7.51734	8.40459	5.86834	11.5202	10.916	6.83517	8.95275	8.24092	7.29103	5.75946
8.42265	8.30537	8.8109	8.63505	9.84345	8.23668	8.84661	9.71354	11.388	13.588		1.10475	1.1196	1.01968	1.12981	1.12778	1.02253	1.61953	1.03951	1.07212	1.05445		8.39767	9.60497	7.60301	10.5649	10.8226	7.86991	11.8772	8.80491	10.7167	12.4535		7.64045	8.37099	5.91213	11.4834	10.9244	6.91988	8.9289	8.29463	7.7591	5.85656
8.45129	8.26697	8.80392	8.6557	9.84737	8.28815	8.90661	9.72792	11.3993	13.5473		1.10982	1.1226	1.01334	1.13588	1.11225	1.02159	1.64313	1.04185	1.07156	1.05522		8.8222	9.63744	7.77376	10.5478	10.8098	7.75751	11.9198	8.78359	10.732	12.7259		7.65678	8.44977	6.03522	11.4847	10.9273	6.95212	8.97036	8.33856	7.41026	5.79037
8.4993	8.27253	8.81066	8.64016	9.82608	8.2404	8.92967	9.67388	11.4171	13.5256		1.10265	1.11622	1.01556	1.13542	1.1515	1.02163	1.63571	1.04276	1.07247	1.05421		8.68283	9.64337	7.59083	10.5618	10.8517	7.92401	12.0634	8.77473	10.6612	12.8039		7.56542	8.37051	6.00338	11.4376	10.8929	6.93	8.94714	8.35655	7.57693	5.92079
8.30379	8.52004	8.75336	8.68355	9.80118	8.27861	8.89792	9.66122	11.412	13.5357		1.10395	1.1132	1.01781	1.1315	1.14942	1.01928	1.65543	1.03981	1.06954	1.05393		9.1	9.63392	7.74899	10.5815	10.837	7.93506	11.8924	8.79915	10.679	12.4763		7.65514	8.40683	5.99179	11.4247	10.9432	6.96894	8.98649	8.36464	7.68785	5.83582
8.63874	8.33631	8.71721	8.71957	9.81306	8.23964	8.93385	9.71618	11.3979	13.3889		1.10816	1.11379	1.021	1.13302	1.14296	1.01706	1.61611	1.04263	1.0689	1.05437		8.46558	9.68038	7.86687	10.5022	10.8268	7.83048	12.1165	8.83886	10.6504	12.4592		7.67845	8.44538	6.05025	11.4047	10.9554	7.04957	8.97964	8.31572	7.20547	5.57977
8.61347	8.2566	8.75194	8.75657	9.81318	8.24175	8.91579	9.70053	11.4273	13.4954		1.10554	1.11596	1.02216	1.13422	1.13114	1.01683	1.66207	1.03988	1.06903	1.05442		8.23603	9.68984	7.74089	10.5316	10.8378	7.84178	11.9577	8.81442	10.7039	12.8559		7.62383	8.12272	6.10106	11.3823	10.9151	7.01675	8.87258	8.35477	7.20108	5.76309
8.56218	8.26432	8.72502	8.75328	9.78436	8.24241	8.92135	9.69637	11.4254	13.5546		1.10536	1.11448	1.01897	1.13118	1.13868	1.01896	1.64759	1.03906	1.07002	1.05386		7.86822	9.87449	7.98433	10.4948	10.836	7.84097	12.2682	8.80477	10.705	12.5031		7.60285	8.52023	5.9946	11.3898	10.903	6.96289	8.90386	8.26516	7.43287	5.6527
8.36564	8.4367	8.69194	8.79013	9.7596	8.25197	8.91864	9.67244	11.4714	13.4578		1.10626	1.11561	1.02063	1.13371	1.13418	1.01865	1.67621	1.04242	1.06828	1.05572		8.13945	9.82366	7.75633	10.4475	10.8462	7.84401	12.1904	8.81591	10.6683	12.3084		7.68816	8.16823	5.9597	11.3626	10.9977	6.87198	8.94015	8.36103	7.49911	5.7431
8.45339	8.28138	8.7088	8.81376	9.79627	8.29676	8.95642	9.64427	11.4238	13.4445		1.10088	1.11406	1.01634	1.14027	1.10638	1.02051	1.63661	1.04262	1.06864	1.05445		8.15848	9.87838	7.78185	10.4265	10.8343	7.76939	12.1119	8.83217	10.6209	12.4972		7.59063	8.22932	6.09293	11.3712	10.9227	6.90053	8.91462	8.29044	7.62798	5.72784
8.44501	8.49546	8.76373	8.87425	9.76881	8.27003	8.92566	9.68659	11.4387	13.4832		1.1059	1.11287	1.02028	1.1387	1.1184	1.02203	1.68328	1.04031	1.06853	1.05399		8.54353	9.84723	7.79947	10.4625	10.8177	7.81301	12.2062	8.81428	10.6581	12.3749		7.58705	8.52917	6.10226	11.3195	10.9492	6.9417	8.94566	8.27506	7.48179	5.80737
8.58911	8.25626	8.80475	8.85187	9.73457	8.30899	8.94463	9.68579	11.4014	13.4844		1.10214	1.10946	1.01967	1.13796	1.1542	1.023	1.67547	1.04052	1.06878	1.05538		8.30225	9.9854	7.58764	10.4786	10.8641	7.84635	12.3505	8.81058	10.6608	12.1492		7.64895	8.38115	5.99815	11.3358	10.9825	6.88803	8.98359	8.23533	7.42251	5.85037
8.40528	8.43509	8.73822	8.8655	9.75037	8.26831	8.94208	9.69486	11.4745	13.4362		1.10452	1.10487	1.01812	1.12958	1.13416	1.02432	1.61463	1.04087	1.0696	1.05436		8.15236	9.96937	7.67861	10.4943	10.8611	7.74567	11.6129	8.86429	10.5538	12.31		7.6154	8.48442	6.19142	11.2995	10.9817	6.8648	8.93557	8.19092	7.53199	5.82524
8.63753	8.26135	8.72973	8.86972	9.7369	8.33199	8.91804	9.65773	11.4996	13.3529		1.09853	1.10499	1.01501	1.13246	1.11443	1.02517	1.6519	1.04388	1.06963	1.0557		8.25518	9.89478	7.75002	10.4485	10.8662	7.85394	11.4721	8.9019	10.5818	12.3484		7.63139	8.49514	6.04546	11.285	10.9196	6.8556	8.9948	8.17515	7.9332	5.87478
8.55767	8.40645	8.65009	8.89879	9.73751	8.23681	8.87713	9.69387	11.4714	13.3354		1.09606	1.10669	1.0226	1.133	1.15214	1.02495	1.66986	1.04383	1.07075	1.05446		8.03032	9.72505	7.89811	10.4249	10.8936	7.76846	11.1884	8.87232	10.6472	12.15		7.62782	8.48277	6.10762	11.2784	10.9401	6.84494	8.89497	8.14441	7.53651	5.85216
8.57567	8.18558	8.62739	8.89351	9.72231	8.24787	8.92526	9.67822	11.4848	13.3856		1.10773	1.11261	1.01828	1.1332	1.14254	1.02449	1.65212	1.04295	1.07099	1.05565		7.99323	9.9016	7.63618	10.3527	10.8753	7.77976	11.4509	8.94026	10.5696	12.1751		7.59307	8.41367	6.24541	11.2463	11.0355	6.8056	8.9245	8.14055	7.42057	5.66387
8.49799	8.43574	8.60327	8.88056	9.7246	8.24763	8.96367	9.68288	11.5076	13.3266		1.11161	1.11568	1.01551	1.12968	1.11761	1.02558	1.66094	1.04357	1.07025	1.05519		8.11862	9.91566	7.80415	10.3128	10.9004	7.72939	11.5433	8.92392	10.5941	12.1314		7.59837	8.28436	6.13611	11.27	10.8935	6.75497	8.96112	8.12983	7.54636	5.63768
8.55504	8.19251	8.72044	8.84918	9.69923	8.2593	8.90197	9.68981	11.5311	13.467		1.11172	1.11579	1.01758	1.12912	1.14122	1.02512	1.62533	1.0437	1.07028	1.05554		8.11569	9.94703	7.68314	10.2215	10.9084	7.84315	11.4177	8.92886	10.4428	12.1293		7.64949	8.44065	6.11709	11.2969	10.923	6.86089	8.88343	8.11336	7.77512	5.72417
8.45465	8.33233	8.63021	8.81187	9.67632	8.18594	8.93068	9.63611	11.5024	13.2853		1.11833	1.11641	1.01947	1.12545	1.13752	1.02306	1.66851	1.04338	1.07005	1.05589		8.08223	10.0209	7.79335	10.1985	10.9266	7.80743	11.4306	9.00172	10.4769	12.1437		7.59098	8.35006	6.14535	11.2785	10.9356	6.85877	8.94756	8.11176	7.77626	5.81907
8.47338	8.13653	8.70592	8.84437	9.66616	8.22278	8.90692	9.61431	11.5428	13.3991		1.11014	1.12004	1.02014	1.12253	1.13879	1.02136	1.62998	1.04209	1.06953	1.0562		7.82431	10.066	7.79069	10.0697	10.9475	7.79409	11.7565	9.02015	10.5421	12.1548		7.64715	8.03144	6.11325	11.2867	11.027	6.85778	8.91864	8.21076	7.80499	5.78783
8.59856	8.10109	8.61636	8.88505	9.65496	8.20136	8.91572	9.6281	11.5071	13.3117		1.10695	1.116	1.02023	1.12397	1.1093	1.02013	1.62076	1.04323	1.07053	1.05671		8.09886	9.81882	7.95295	10.0687	10.9433	7.79995	11.6895	8.99486	10.4573	12.1004		7.69099	8.15642	6.16449	11.2216	10.9545	6.82706	8.87454	8.14688	8.03797	5.67835
8.5314	8.12345	8.66146	8.86594	9.63472	8.14439	8.92861	9.59264	11.5331	13.4288		1.1037	1.11997	1.01234	1.12516	1.13393	1.02065	1.64684	1.04322	1.07135	1.05701		7.98827	10.3259	7.71027	9.99285	10.9612	7.78371	11.7229	9.02048	10.4374	12.115		7.58692	8.35664	6.25269	11.2527	11.0569	6.81756	8.88128	8.16189	7.92122	5.74974
8.66287	8.11984	8.66862	8.89113	9.65918	8.21633	8.90227	9.59418	11.5182	13.331		1.10514	1.12582	1.01286	1.122	1.1021	1.02247	1.62523	1.04295	1.07121	1.05449		7.69178	9.89855	7.88768	9.92396	10.9567	7.77778	12.141	9.07393	10.4733	12.2722		7.60125	8.24174	6.14425	11.2641	10.9048	6.78611	8.95286	8.20242	7.85037	5.71136
8.66246	8.11175	8.72322	8.88391	9.64573	8.22256	8.9317	9.62828	11.4834	13.424		1.10605	1.11969	1.01337	1.12155	1.12707	1.02725	1.66736	1.04314	1.07084	1.05537		7.94972	9.42183	7.72585	9.86111	10.9906	7.72403	12.2526	9.02321	10.4481	12.2792		7.64336	8.10451	6.13727	11.3084	11.0254	6.86447	8.93789	8.21472	7.82447	5.78522
8.69418	8.06919	8.64108	8.89214	9.64277	8.21315	8.91097	9.5772	11.4771	13.3942		1.11211	1.12008	1.01273	1.11493	1.11337	1.02225	1.63984	1.04229	1.07113	1.05707		7.86295	9.94795	7.47386	9.83235	11.022	7.77958	11.9353	9.01966	10.4119	12.1747		7.57097	7.69405	6.16242	11.3089	10.923	6.81835	8.8532	8.28613	7.81731	5.83922
8.47316	8.11657	8.64479	8.89555	9.62303	8.18114	8.91517	9.57678	11.4551	13.5145		1.10125	1.12219	1.01913	1.11503	1.12579	1.02186	1.65438	1.04253	1.07109	1.057		7.79137	9.8454	7.56119	9.77727	11.0456	7.82074	11.9548	9.05523	10.3936	12.3689		7.58089	7.58879	6.3191	11.3318	10.9829	6.82515	8.94764	8.27334	7.82589	5.8162
8.58979	8.31865	8.64145	8.89383	9.62616	8.16969	8.98584	9.62828	11.4267	13.5379		1.10458	1.11667	1.01542	1.11046	1.11202	1.01974	1.60263	1.04431	1.07089	1.05531		7.81255	9.44564	7.44281	9.72244	11.0508	7.75753	12.0597	9.05746	10.423	12.3784		7.64511	8.05226	6.44189	11.3249	10.9915	6.84509	8.88807	8.31707	7.92312	5.77111
8.53211	8.15436	8.60289	8.89186	9.60188	8.12825	8.95265	9.5837	11.4112	13.3618		1.10231	1.11465	1.01634	1.11154	1.14215	1.02061	1.63738	1.04137	1.0719	1.0559		8.1216	9.53558	7.71275	9.79132	11.074	7.7666	12.1114	9.08815	10.3425	12.35		7.5889	8.05025	6.38128	11.3253	10.9353	6.83416	8.83356	8.23364	7.85847	5.7212
8.45927	8.09065	8.64437	8.8897	9.5859	8.1739	8.94872	9.59165	11.3554	13.2675		1.09898	1.11705	1.02131	1.11183	1.10261	1.02072	1.68512	1.0417	1.07135	1.05443		7.79176	9.93984	7.84226	9.84263	11.0727	7.79074	12.2497	9.14209	10.388	12.3332		7.56513	7.5017	6.29305	11.3423	10.9538	6.77896	8.74659	8.28397	7.56252	5.7534
8.56789	8.05558	8.65542	8.91803	9.57485	8.08929	8.87719	9.64494	11.3306	13.2246		1.09765	1.11761	1.01384	1.11459	1.14578	1.01928	1.61921	1.042	1.07282	1.05565		8.11641	9.62889	7.81963	9.88936	11.0677	7.74362	12.2111	9.18987	10.3347	12.3966		7.64721	7.89285	6.39247	11.3385	11.0331	6.82332	8.93471	8.31923	7.37345	5.74604
8.63935	8.01734	8.6155	8.92652	9.57945	8.10999	8.95859	9.56695	11.3574	13.3306		1.10322	1.11454	1.01323	1.10697	1.12685	1.02288	1.65619	1.04405	1.07436	1.05547		8.04209	9.46901	7.89172	9.85347	11.0233	7.72503	12.422	9.20254	10.3541	12.3216		7.56265	7.86381	6.31991	11.2994	10.9861	6.73817	8.98919	8.20089	7.60731	5.7518
8.50937	8.04392	8.64587	8.90181	9.56361	8.09169	9.00183	9.55723	11.3239	13.3373		1.10856	1.11383	1.01884	1.11174	1.12948	1.02043	1.6236	1.04132	1.07487	1.05674		8.44286	10.055	7.57416	9.87139	10.9831	7.59899	12.3433	9.16055	10.2763	12.2703		7.5825	8.27694	6.3233	11.2938	10.9732	6.78106	8.90429	8.24112	7.61975	5.64743
8.23433	8.01939	8.65148	8.95234	9.55706	8.15682	9.00511	9.59899	11.2751	13.4717		1.10707	1.1119	1.01656	1.10899	1.12793	1.0221	1.60635	1.04141	1.07851	1.05554		7.75231	9.5173	7.73885	9.85419	10.9134	7.77961	12.5437	9.12721	10.3464	12.5035		7.65081	7.99636	6.50738	11.3163	11.0512	6.76368	8.88256	8.27789	7.49083	5.81729
8.28618	8.00753	8.55719	8.93989	9.55138	8.01873	9.01374	9.54876	11.2868	13.3316		1.10386	1.10781	1.01725	1.11409	1.12484	1.02581	1.64711	1.0436	1.07966	1.05589		7.81827	9.31592	7.56887	9.86172	10.8881	7.68061	12.1515	9.15922	10.3791	12.5823		7.58744	8.15389	6.40647	11.3212	10.9788	6.81517	8.96845	8.27938	7.489	5.74017
8.52201	8.0172	8.65926	8.92132	9.53524	8.06743	8.99464	9.4962	11.2499	13.2928		1.10803	1.11742	1.01522	1.11117	1.11566	1.02367	1.65135	1.04291	1.08054	1.05497		7.85865	9.73645	7.68932	9.8249	10.8234	7.77511	12.5609	9.11483	10.2966	12.3947		7.58278	8.1936	6.32942	11.2967	10.9816	6.81151	8.88625	8.28427	7.55404	5.6747
8.37958	8.00114	8.6581	8.92078	9.51927	8.06981	9.03525	9.54688	11.251	13.3326		1.1138	1.1201	1.0137	1.10874	1.09915	1.02494	1.66332	1.0411	1.08042	1.05558		7.79431	9.73388	7.7484	9.78595	10.7787	7.79952	11.9521	9.09097	10.2135	12.4664		7.67104	8.21424	6.16736	11.2797	10.9927	6.85847	8.94868	8.23376	7.38912	5.65114
8.59288	7.95984	8.63517	8.91883	9.53246	8.08293	9.01446	9.54292	11.2488	13.1983		1.10465	1.11272	1.0183	1.10617	1.13726	1.02717	1.68188	1.04502	1.08071	1.05549		8.09943	9.19943	7.72639	9.75603	10.729	7.70429	12.3625	9.11907	10.1438	12.7048		7.61023	7.93037	6.28449	11.2802	10.9054	6.83444	8.93761	8.35736	7.43304	5.73618
8.61702	7.96255	8.68806	8.91571	9.51288	8.0336	9.01722	9.51669	11.2758	13.3428		1.09626	1.11139	1.01997	1.1084	1.14104	1.0266	1.64591	1.0424	1.08025	1.05587		8.09436	9.53424	7.73865	9.79294	10.7211	7.77811	12.0811	9.0592	10.204	12.5086		7.55374	8.36071	6.09079	11.2736	10.9304	6.95069	8.88818	8.33253	7.60437	5.78948
8.46113	7.94554	8.65845	8.92144	9.50989	8.08169	9.05573	9.52929	11.2325	13.3912		1.1082	1.1075	1.0159	1.10534	1.13188	1.02703	1.65776	1.04185	1.07901	1.05754		8.04208	9.80077	7.70596	9.7777	10.7712	7.71391	12.0535	9.08461	10.2552	12.5227		7.6184	8.32543	6.07376	11.3283	11.0584	6.87936	8.97963	8.27165	7.56307	5.73339
8.36235	7.9078	8.69285	8.93163	9.51423	8.09424	9.06145	9.54986	11.2273	13.5126		1.10339	1.11517	1.019	1.10876	1.12098	1.0267	1.64455	1.04059	1.07968	1.05684		8.14112	9.56678	7.73007	9.80179	10.8496	7.72244	12.0953	9.06034	10.2053	12.5213		7.56529	7.97232	6.0369	11.4494	11.0624	6.89628	8.98726	8.3249	7.50798	5.67856
8.53135	7.91832	8.77234	8.94276	9.50044	8.05954	9.03275	9.50174	11.2123	13.3823		1.11137	1.11593	1.01663	1.10787	1.11205	1.02504	1.70215	1.04178	1.08066	1.05544		7.98935	9.30918	7.64725	9.75671	10.8444	7.78577	12.3052	9.03964	10.1482	12.2709		7.54801	8.2077	6.04628	11.4527	11.0215	6.88182	8.98468	8.33136	7.58475	5.77159
8.45254	7.9383	8.68679	8.9366	9.4761	8.10625	9.0703	9.53242	11.1678	13.5231		1.10369	1.11292	1.01302	1.1087	1.13516	1.02462	1.67177	1.03987	1.08012	1.05692		7.96078	9.97109	7.46396	9.76074	10.8239	7.73752	12.4839	9.01625	10.1916	12.1092		7.61011	8.44539	5.87326	11.429	11.0013	6.86948	8.95319	8.32764	7.60031	5.6943
8.48344	7.88791	8.70622	8.97101	9.46884	8.086	9.05454	9.55288	11.1696	13.3762		1.1059	1.1119	1.01919	1.11234	1.13065	1.02524	1.69102	1.04456	1.08292	1.05577		8.08856	9.87265	7.71861	9.73192	10.8154	7.66228	12.1266	8.99946	10.2054	12.1962		7.59398	8.09248	6.28919	11.3835	11.0203	6.8807	8.93432	8.28783	7.52929	5.72909
8.58791	7.8851	8.71682	8.95294	9.4827	8.11003	9.03046	9.46398	11.184	13.4841		1.10839	1.11092	1.01913	1.11163	1.10522	1.02443	1.72792	1.03805	1.08109	1.05628		8.10638	9.29501	7.52489	9.64991	10.8181	7.76005	12.083	9.00153	10.1572	12.1674		7.54025	8.1712	6.42797	11.32	10.9947	6.79517	8.89174	8.33712	7.90908	5.68432
8.34195	7.90344	8.67852	8.96641	9.4484	8.05295	9.09263	9.49333	11.1323	13.382		1.10188	1.11369	1.01334	1.11391	1.13236	1.0246	1.68044	1.03923	1.08131	1.0573		8.05529	9.45793	7.73673	9.67163	10.7991	7.73709	11.5374	8.96873	10.1027	12.1472		7.63742	8.35609	6.41578	11.3792	10.8188	6.84422	8.82455	8.25593	7.63294	5.72964
8.30611	7.87992	8.65902	9.00209	9.42966	8.08863	9.05514	9.48451	11.1533	13.3585		1.101	1.11386	1.0158	1.11808	1.10896	1.02183	1.65362	1.04233	1.07967	1.05562		8.10815	9.57289	7.84114	9.6524	10.8287	7.65469	11.3455	8.92708	10.1568	12.0975		7.54828	8.22301	6.45689	11.478	10.9597	6.8654	8.86532	8.14779	7.5508	5.71985
8.4954	7.8875	8.69929	8.97451	9.46703	8.06075	9.0766	9.45429	11.1448	13.3329		1.10841	1.11076	1.01635	1.1169	1.10525	1.0214	1.64891	1.03892	1.08152	1.05564		7.77078	9.60345	7.66975	9.61273	10.794	7.73559	11.4665	8.92909	10.0436	12.1258		7.52536	8.08347	6.6056	11.4483	10.935	6.78485	8.91864	8.25043	7.7913	5.67758
8.56861	7.88271	8.63834	9.00463	9.45441	8.0837	9.07859	9.48059	11.1069	13.3368		1.10506	1.10495	1.0122	1.11575	1.13477	1.02065	1.63935	1.04383	1.07825	1.05639		7.97561	9.5875	7.83282	9.64745	10.7785	7.71535	11.7059	8.89033	10.001	12.0275		7.58515	7.89103	6.48072	11.4468	10.8504	6.79137	8.90292	8.32212	7.71663	5.80631
8.45199	7.84547	8.6925	8.976	9.44601	8.14618	9.1328	9.46362	11.1263	13.1846		1.10697	1.11004	1.01724	1.1225	1.12111	1.01967	1.67671	1.03946	1.08064	1.05647		7.83121	9.69167	7.72923	9.65161	10.7722	7.76283	11.328	8.8652	9.9711	12.0423		7.54871	8.06785	6.65276	11.3985	10.8264	6.80187	8.82381	8.27074	7.57869	5.75933
8.5651	7.85053	8.69207	9.01432	9.41225	8.14092	9.14304	9.44047	11.1091	13.493		1.11219	1.10643	1.01347	1.1133	1.12169	1.01805	1.64437	1.03938	1.07991	1.05606		8.20569	9.54207	7.81141	9.64252	10.8004	7.71292	11.762	8.84734	10.1475	12.0495		7.52316	8.17273	6.60427	11.3856	10.9006	6.74136	8.8684	8.26299	7.73611	5.74799
8.50466	7.85939	8.6803	9.01254	9.43967	8.17353	9.11769	9.43277	11.0577	13.3552		1.10525	1.11016	1.01613	1.1218	1.13215	1.01755	1.67034	1.04224	1.08087	1.05581		8.18539	9.59354	7.57781	9.64935	10.7328	7.69215	11.736	8.8552	10.0041	12.1521		7.64483	8.39378	6.61895	11.3691	10.9069	6.82602	8.92246	8.29185	7.62864	5.6809
8.46101	7.8295	8.66992	9.02552	9.41003	8.27047	9.11876	9.45457	11.0491	13.3864		1.12126	1.11061	1.01902	1.12622	1.13026	1.01846	1.67973	1.03901	1.07953	1.05736		7.8277	9.59224	7.54569	9.62009	10.8045	7.70397	12.0132	8.85368	10.0263	12.1596		7.56684	8.30165	6.63362	11.356	11.0066	6.71484	8.83639	8.18175	7.84974	5.69702
8.52492	7.83753	8.68785	9.02761	9.41446	8.22669	9.15381	9.41707	11.0981	13.4934		1.1133	1.10774	1.01766	1.12354	1.12543	1.01647	1.64583	1.04275	1.07817	1.05734		8.47474	9.69046	7.76112	9.56687	10.7844	7.63972	12.1351	8.82691	10.023	12.0876		7.50882	8.48702	6.65481	11.3217	10.889	6.72757	8.81267	8.14431	7.84782	5.77076
8.59452	7.84509	8.63677	8.97159	9.41528	8.3017	9.11053	9.44357	11.0259	13.3656		1.10351	1.10743	1.01619	1.12422	1.12713	1.01906	1.71429	1.04058	1.07835	1.05754		8.22109	9.543	7.95919	9.53779	10.7617	7.70787	12.318	8.84382	10.0085	12.1618		7.5381	8.4312	6.61242	11.2657	10.9556	6.73908	8.92269	8.20908	7.80401	5.69179
8.70169	7.81541	8.64538	9.05266	9.41807	8.32469	9.10049	9.43253	11.046	13.3332		1.11084	1.11258	1.01316	1.12909	1.11526	1.02029	1.66592	1.04663	1.07838	1.0566		8.24624	9.55024	7.89668	9.51835	10.7918	7.71081	12.5469	8.89968	9.92897	12.2673		7.57813	8.16236	6.79375	11.2641	10.9506	6.76232	8.86269	8.1831	7.76289	5.77835
8.36467	7.81233	8.69233	9.0177	9.40622	8.2411	9.12376	9.37983	11.0338	13.4558		1.1055	1.11102	1.01849	1.13346	1.13498	1.02027	1.63785	1.04025	1.07858	1.05769		7.63679	9.6337	7.62998	9.43833	10.7843	7.66371	12.0882	8.83704	9.97462	12.1638		7.49439	8.14712	6.59366	11.2474	11.0364	6.76244	8.86722	8.17241	7.78754	5.71573
8.39628	7.81474	8.62326	9.01609	9.37934	8.35224	9.19813	9.422	11.0168	13.3804		1.10485	1.1078	1.01145	1.13448	1.13087	1.01709	1.65705	1.04273	1.07821	1.05731		8.41894	9.44492	7.71356	9.40418	10.7889	7.64679	12.3199	8.85197	9.93801	12.2898		7.53467	8.11364	6.72572	11.235	10.9133	6.8195	8.90848	8.14813	7.74416	5.69597
8.31091	7.78122	8.70287	9.01408	9.38668	8.20536	9.14524	9.41588	10.9813	13.3488		1.10359	1.10891	1.01256	1.14363	1.12072	1.02032	1.65717	1.04288	1.07737	1.05747		8.47335	9.53663	7.8516	9.32093	10.7519	7.68718	12.2337	8.88058	9.88346	12.3982		7.56196	8.09782	6.7448	11.2435	10.925	6.80011	8.86841	8.04381	7.8685	5.78555
8.34473	7.7881	8.64276	9.0142	9.36913	8.24601	9.13149	9.42656	11.0848	13.3577		1.10569	1.10964	1.01789	1.14135	1.11624	1.02046	1.68352	1.04348	1.07733	1.06021		9.17901	9.70148	7.96978	9.27036	10.8283	7.6816	12.3374	8.85275	9.91837	12.2537		7.52398	8.3521	6.64273	11.2228	10.9451	6.83427	8.89379	8.15945	7.5241	5.68859
8.4873	7.78802	8.68373	8.99407	9.35864	8.17588	9.1872	9.41292	11.0371	13.378		1.09443	1.10737	1.01314	1.14414	1.10934	1.01926	1.67133	1.03987	1.07899	1.05773		9.32205	9.62099	7.83258	9.19029	10.7929	7.62998	12.4966	8.8847	9.88286	12.1868		7.53517	8.27834	6.66457	11.1794	10.8763	6.8787	8.93487	8.20901	7.69759	5.73624
8.57328	7.78317	8.72375	9.04133	9.35059	8.2157	9.17751	9.44049	11.0301	13.5006		1.10628	1.10917	1.02027	1.14937	1.12339	1.02083	1.66526	1.04253	1.07906	1.05782		8.96329	9.43373	7.71707	9.21935	10.8041	7.70362	12.2649	8.86514	9.87431	12.2701		7.53921	8.42216	6.61426	11.1648	11.0405	6.84165	8.81332	8.23498	7.79239	5.73721
8.44524	7.75562	8.65969	9.05626	9.34964	8.16132	9.20329	9.4098	11.0665	13.3495		1.10215	1.10365	1.01947	1.14305	1.11627	1.02022	1.69015	1.0424	1.08064	1.05889		9.02918	9.76581	7.75792	9.19484	10.805	7.69844	12.0796	8.83591	9.90037	12.1258		7.51985	8.20004	6.62406	11.159	10.8793	6.80282	8.85468	8.16351	7.44964	5.70106
8.27299	7.77369	8.67241	9.01709	9.34786	8.19416	9.15357	9.4073	11.0691	13.3676		1.10377	1.10178	1.01753	1.14327	1.09924	1.02077	1.73167	1.04281	1.0812	1.05945		9.46802	9.49456	7.81404	9.1224	10.7987	7.69383	12.2341	8.88657	9.89516	12.1132		7.6018	8.11487	6.73895	11.1708	10.9944	6.76795	8.88837	8.13953	7.74349	5.65349
8.63065	7.77876	8.64188	9.01249	9.37268	8.07991	9.14987	9.40827	11.03	13.3722		1.09584	1.10576	1.01664	1.1409	1.13816	1.02165	1.69987	1.04288	1.08244	1.058		9.67944	9.39851	7.74702	9.12291	10.8537	7.61295	12.363	8.91701	9.86738	12.0547		7.55408	8.12278	6.76594	11.123	10.9069	6.78943	8.80475	8.12362	7.86977	5.71304
8.49821	7.74557	8.63351	8.98809	9.35491	8.08748	9.11297	9.39691	11.0684	13.4546		1.10284	1.10283	1.01725	1.14764	1.12298	1.02158	1.68602	1.04669	1.08368	1.05902		8.53102	9.52246	7.93716	9.14789	10.8134	7.67288	12.4698	8.88162	9.73372	12.0709		7.50061	8.10175	6.7306	11.1254	10.9102	6.78796	8.92713	8.12843	7.76999	5.72123
8.4186	7.75746	8.75905	8.98721	9.34251	8.08675	9.16102	9.40429	11.0392	13.4668		1.09316	1.1003	1.01504	1.14663	1.13077	1.02147	1.67014	1.04134	1.0832	1.05962		7.98384	9.53717	7.75317	9.11297	10.8262	7.66823	12.3485	8.93633	9.79403	12.0754		7.52664	7.89591	6.84055	11.1637	10.893	6.88077	8.85318	8.04657	7.82277	5.7171
8.56437	7.75724	8.73007	8.97972	9.32271	7.97203	9.19434	9.39337	11.0273	13.1863		1.10181	1.10973	1.01407	1.14996	1.12745	1.02511	1.60541	1.04605	1.08593	1.0598		7.95467	9.25175	7.94344	9.11621	10.8385	7.59713	11.9314	8.89926	9.67884	12.1318		7.5517	8.01861	6.65451	11.1655	10.8995	6.86105	8.78889	8.15173	7.89425	5.6639
8.56175	7.72318	8.77033	8.98922	9.34083	7.9458	9.17303	9.35763	11.0504	13.156		1.09791	1.11038	1.0167	1.15035	1.13551	1.02271	1.68048	1.04394	1.08419	1.05977		7.77461	9.62911	7.90086	9.15483	10.8231	7.67462	12.328	8.90007	9.73718	12.0859		7.52544	7.72322	6.67434	11.1717	10.9099	6.78904	8.91985	8.01643	8.16531	5.69125
8.54676	7.72954	8.67127	8.98796	9.33457	7.98966	9.18504	9.36822	11.0325	13.3312		1.09644	1.11119	1.01225	1.14485	1.11556	1.02411	1.68469	1.04583	1.08729	1.06099		8.25152	9.46289	7.86217	9.15187	10.8087	7.66231	12.2971	8.90654	9.8154	12.1014		7.47689	7.72879	6.74213	11.1416	10.9506	6.77888	8.85666	8.15886	7.97547	5.76711
8.43753	7.74849	8.71174	8.96809	9.32459	7.91216	9.21284	9.35884	11.0027	13.3163		1.10258	1.1044	1.01749	1.15387	1.10571	1.02712	1.74723	1.04337	1.08897	1.06076		8.25451	9.50369	7.90966	9.16451	10.8429	7.58738	12.2825	8.9505	9.712	12.2055		7.52137	7.65882	6.72041	11.1087	10.9014	6.81797	8.86577	8.16774	7.84867	5.71825
8.4465	7.6938	8.49938	8.98537	9.31848	7.94779	9.20424	9.30316	11.0735	13.1766		1.09071	1.10349	1.01796	1.15071	1.10708	1.02705	1.67622	1.04307	1.08726	1.05913		8.13432	9.44104	7.69257	9.14819	10.8242	7.69633	12.1633	8.98402	9.79504	12.2285		7.53961	7.7497	6.77152	11.095	10.9054	6.79265	8.92795	8.21993	7.7949	5.68464
8.54607	7.69753	8.67281	8.95477	9.2921	7.97893	9.2071	9.31753	11.1003	13.3219		1.09095	1.1046	1.01636	1.15829	1.10954	1.02749	1.69883	1.04258	1.08913	1.06113		7.89851	9.37242	7.92375	9.14995	10.8816	7.6401	12.4106	8.94344	9.77741	12.2336		7.59406	7.78522	6.80292	11.0889	10.9641	6.7884	8.81114	8.23563	8.28555	5.70522
8.47642	7.70209	8.61025	8.93935	9.28908	7.84609	9.23521	9.3748	11.0591	13.455		1.08675	1.10361	1.0154	1.14708	1.09709	1.02619	1.64385	1.04684	1.08821	1.05869		8.02306	9.13087	8.08519	9.15743	10.9586	7.59067	11.6759	8.92767	9.67689	12.1781		7.49941	7.78683	6.78688	11.0655	10.8982	6.76862	8.81426	8.27131	8.4253	5.74069
8.52191	7.69728	8.60254	8.98431	9.29843	7.90019	9.20515	9.35347	11.0724	13.2469		1.08996	1.11086	1.01815	1.15849	1.11205	1.02788	1.70046	1.0428	1.08742	1.05972		8.48495	9.52456	7.84846	9.15837	10.9632	7.56957	11.6285	8.91976	9.72685	12.1474		7.56018	7.65077	6.74614	11.0624	10.9654	6.80984	8.7272	8.18941	7.83643	5.77055
8.49688	7.68412	8.67701	8.97132	9.29655	7.99831	9.25298	9.35271	11.1091	13.3874		1.08747	1.11245	1.01733	1.14679	1.13198	1.02262	1.66744	1.04044	1.08538	1.05841		8.02535	9.43172	8.10968	9.14043	10.9576	7.68795	11.64	8.98688	9.74328	12.1794		7.54192	7.71157	6.76317	11.1333	10.921	6.79501	8.84688	8.162	8.06894	5.7577
8.44016	7.68992	8.75188	8.9536	9.2958	7.99932	9.23382	9.33916	11.0801	13.2487		1.08421	1.11444	1.01331	1.15204	1.10272	1.02749	1.69397	1.04019	1.08658	1.05881		7.98628	9.30052	7.995	9.12151	10.9616	7.63406	11.6275	8.96853	9.62932	12.1165		7.51441	7.8179	6.83952	11.1458	10.9852	6.77734	8.80263	8.15755	8.07294	5.68804
8.32379	7.66358	8.62635	8.97677	9.27503	7.94394	9.22405	9.30232	11.1256	13.2191		1.09945	1.11576	1.0178	1.14974	1.1311	1.026	1.72173	1.04375	1.08355	1.05898		7.897	9.55651	7.93731	9.1211	10.9341	7.68342	11.6693	8.94038	9.65245	12.106		7.4681	8.03734	6.88043	11.2119	10.9049	6.79922	8.83457	8.26783	7.88689	5.78434
8.42133	7.62511	8.5925	8.95754	9.27576	7.9776	9.27369	9.30304	11.1237	13.3485		1.0822	1.11058	1.01725	1.14802	1.11838	1.02364	1.62814	1.03928	1.08409	1.05904		8.34514	9.27789	8.00773	9.12003	11.0107	7.60653	11.6022	9.01027	9.61765	12.1861		7.52169	8.10914	6.91737	11.2606	10.9994	6.78059	8.76759	8.18225	7.83796	5.67376
8.39818	7.65914	8.56813	8.9784	9.28564	7.99376	9.29837	9.3134	11.1375	13.3742		1.09048	1.10417	1.01247	1.14788	1.12624	1.02173	1.7082	1.04725	1.08357	1.05958		7.92711	9.58156	7.8789	9.11901	10.9643	7.65261	11.78	9.02234	9.64877	12.228		7.49042	8.0414	6.92915	11.2632	10.9152	6.75109	8.87112	8.19977	7.89097	5.72509
8.4769	7.63382	8.58343	8.99141	9.27814	8.09393	9.21111	9.27955	11.1318	13.2317		1.09155	1.107	1.01139	1.14872	1.10227	1.01978	1.69258	1.04428	1.08172	1.06025		7.94546	9.38538	8.10612	9.11216	10.9345	7.62064	12.1653	9.06677	9.63401	12.1371		7.47467	7.88529	6.68107	11.338	10.968	6.79744	8.85986	8.24457	7.88025	5.7184
8.4667	7.61085	8.64664	8.98276	9.26304	8.21912	9.2797	9.27598	11.1862	13.2173		1.08598	1.10763	1.01123	1.15283	1.11746	1.01942	1.64953	1.04181	1.08073	1.06109		8.00835	9.40829	7.92539	9.08289	10.8811	7.5679	11.9879	9.12228	9.60342	12.1336		7.55951	7.91051	6.49311	11.3002	10.9708	6.77514	8.81118	8.1918	7.89675	5.64411
8.55046	7.61937	8.57151	8.95711	9.25968	8.34013	9.18247	9.29302	11.1383	13.2159		1.1043	1.10321	1.01184	1.15377	1.10836	1.01774	1.73778	1.04474	1.07988	1.05775		7.90064	9.55865	8.22199	9.07241	10.8941	7.57739	12.0618	9.1736	9.55399	12.2591		7.49277	7.87752	6.39015	11.2888	10.9304	6.76657	8.821	8.22428	7.49491	5.49177
8.36689	7.58446	8.60939	8.97277	9.22406	8.17831	9.19504	9.25252	11.1711	13.1939		1.09599	1.10553	1.01495	1.14666	1.11778	1.01495	1.69917	1.04226	1.07729	1.06011		8.03284	9.40467	7.99173	9.08586	10.935	7.58885	12.3894	9.18536	9.55243	12.2205		7.45442	8.02398	6.59999	11.2298	11.0844	6.75168	8.84097	8.22707	7.77424	5.60137
8.42982	7.56262	8.61685	8.96886	9.25235	8.14983	9.25469	9.26194	11.1372	13.2401		1.09322	1.11162	1.01346	1.15324	1.07802	1.01617	1.67958	1.04517	1.07644	1.06046		8.21136	9.37425	8.26128	9.12801	10.9551	7.62126	12.0979	9.16266	9.56929	12.171		7.59147	7.67632	6.56295	11.2608	11.0452	6.72841	8.76615	8.12281	7.70497	5.74292
8.37539	7.56842	8.58586	8.93811	9.2525	8.23537	9.23481	9.30663	11.1266	13.3792		1.10263	1.1098	1.02199	1.14911	1.12681	1.01443	1.6695	1.04107	1.07568	1.05935		8.26797	9.52959	7.93579	9.12935	10.9458	7.59252	12.0012	9.16569	9.57627	12.3164		7.50664	7.95648	6.61686	11.3506	11.1084	6.77256	8.85353	8.24653	7.67209	5.64872
8.44751	7.59097	8.63678	8.94786	9.22672	8.13169	9.24336	9.26881	11.1824	13.194		1.10462	1.10995	1.0169	1.1443	1.10339	1.02061	1.70495	1.04205	1.07258	1.06087		8.11744	9.31389	8.11534	9.07279	10.9081	7.67083	12.1303	9.18954	9.48363	12.3322		7.51448	7.97168	6.93481	11.3384	11.0629	6.77338	8.8409	8.20909	7.75924	5.62268
8.50642	7.56695	8.59599	8.95089	9.22228	8.06379	9.22654	9.25385	11.1787	13.3378		1.0914	1.11355	1.01555	1.1489	1.12712	1.018	1.72232	1.04171	1.07044	1.06303		7.83214	9.52376	8.10543	9.10693	10.9306	7.57469	12.5178	9.1285	9.50637	12.1824		7.54289	7.99009	6.91606	11.3223	11.0807	6.74059	8.69774	8.22656	8.01857	5.7285
8.3227	7.56588	8.60027	8.92643	9.21402	8.07356	9.21114	9.26982	11.1498	13.2085		1.09437	1.11514	1.01554	1.14602	1.1233	1.01768	1.70307	1.04385	1.06753	1.06138		8.00705	9.43659	8.20852	9.04597	10.8892	7.59644	12.83	9.19976	9.55056	12.3034		7.50007	7.77623	6.9472	11.2648	10.9841	6.82079	8.74277	8.18676	7.39623	5.61196
8.3438	7.55146	8.61274	8.95424	9.19911	8.08141	9.20434	9.2345	11.164	13.2017		1.08903	1.11286	1.00928	1.15068	1.12136	1.01685	1.6668	1.04127	1.06811	1.06239		7.88253	9.30226	8.1418	8.96994	10.8997	7.64778	11.9715	9.1826	9.50205	12.2632		7.47942	7.79258	6.89735	11.2492	11.1199	6.8096	8.76597	8.27142	7.90002	5.65915
8.32298	7.55779	8.61886	8.95164	9.22197	8.09043	9.20205	9.20357	11.1264	13.1989		1.09834	1.11734	1.01542	1.14646	1.12147	1.01695	1.74179	1.04204	1.06743	1.06402		7.99051	9.34262	8.48892	8.93059	10.8927	7.65376	12.5656	9.21212	9.4968	12.2566		7.48651	7.86545	6.9138	11.2243	11.1504	6.83559	8.7231	8.2014	8.1695	5.66362
8.32569	7.53803	8.60272	8.93016	9.18064	8.06449	9.24853	9.24505	11.1049	13.149		1.09303	1.11756	1.01114	1.1437	1.13165	1.01798	1.71913	1.04183	1.06885	1.06235		7.91102	9.31779	8.49748	8.86572	10.8448	7.59085	12.664	9.20126	9.54522	12.3616		7.49296	7.63296	6.9918	11.1757	10.9838	6.80832	8.80496	8.11552	7.89587	5.70584
8.2559	7.54509	8.55536	8.93317	9.21062	7.96351	9.20661	9.21964	11.1185	13.1521		1.10087	1.11166	1.01604	1.14428	1.10426	1.01839	1.73012	1.04344	1.06813	1.06344		8.06027	9.28804	8.65037	8.80303	10.8887	7.59447	12.7906	9.20681	9.46677	12.3072		7.46976	7.52589	6.9572	11.1585	10.9178	6.75544	8.77678	8.2403	7.67358	5.63031
8.43165	7.55771	8.60988	8.92468	9.17344	7.90196	9.25633	9.19144	11.1258	13.1182		1.09614	1.11233	1.00936	1.14498	1.13368	1.02126	1.6768	1.04316	1.06564	1.06295		7.8403	9.32673	8.73101	8.73582	10.8666	7.56879	12.1827	9.16038	9.4704	12.2993		7.53707	7.49227	6.93617	11.1505	10.8329	6.76781	8.73188	8.16799	7.84553	5.65719
8.58302	7.53423	8.64953	8.92844	9.21112	8.05746	9.22813	9.23463	11.0551	13.2914		1.10126	1.11354	1.01498	1.1434	1.1203	1.0132	1.68964	1.04519	1.06751	1.0628		8.14174	9.16515	9.10973	8.74908	10.8307	7.61884	12.4909	9.1628	9.50378	12.2845		7.49827	7.4537	6.87237	11.1472	11.01	6.76734	8.72102	8.20384	7.78587	5.61027
8.24521	7.52732	8.533	8.95096	9.17885	7.95216	9.21599	9.21437	11.0913	13.2845		1.10032	1.10683	1.01903	1.14264	1.124	1.01696	1.71211	1.04197	1.06631	1.06443		7.88884	9.29491	8.74154	8.72806	10.8261	7.60083	12.037	9.19358	9.44753	12.218		7.43705	7.6337	6.91936	11.118	10.9155	6.78	8.86652	8.12743	7.64063	5.61709
8.41869	7.5127	8.6277	8.92346	9.1833	7.87309	9.24421	9.1751	11.0573	13.1254		1.09571	1.10968	1.01262	1.14621	1.12494	1.01755	1.741	1.0449	1.06721	1.06165		8.04791	9.38478	8.81272	8.68575	10.8197	7.53536	12.2427	9.17788	9.5354	12.2084		7.4957	7.61617	6.91094	11.0791	10.8656	6.69521	8.74736	8.21804	7.81221	5.53473
8.31646	7.50721	8.61267	8.94894	9.19418	7.88163	9.23322	9.21979	11.0437	13.2425		1.09058	1.11073	1.01625	1.14427	1.11112	1.01789	1.73022	1.0445	1.06588	1.06265		8.19948	9.16479	9.15698	8.6683	10.7619	7.63127	12.5486	9.14853	9.44367	12.2245		7.49648	7.73575	6.97619	11.0804	10.9085	6.80919	8.80092	8.10555	7.83558	5.77428
8.27678	7.49683	8.531	8.92939	9.1671	7.99318	9.25763	9.18691	11.0521	13.2239		1.08959	1.1098	1.01406	1.14728	1.1288	1.0201	1.75049	1.04496	1.06664	1.06508		7.8421	9.43787	8.9562	8.61749	10.7233	7.57856	12.3331	9.12209	9.4016	12.1123		7.41456	7.49284	7.03105	11.0813	10.9138	6.77731	8.8674	8.08086	7.84428	5.50657
8.45995	7.49479	8.59093	8.91066	9.1606	7.91848	9.20794	9.15633	11.032	13.0852		1.09771	1.10718	1.01671	1.14487	1.1096	1.02248	1.71079	1.04152	1.06509	1.06392		7.78159	9.37252	8.74554	8.61768	10.6545	7.65827	11.6014	9.02542	9.44953	12.2683		7.47158	7.6879	7.02581	11.0328	10.8841	6.66221	8.8207	8.01802	7.88236	5.74167
8.30413	7.48076	8.65226	8.92787	9.1449	7.94641	9.19397	9.17439	10.9997	13.0914		1.09648	1.10648	1.01472	1.14181	1.13811	1.01678	1.72712	1.04483	1.06685	1.06411		8.02995	9.21527	9.08676	8.67449	10.6151	7.5881	11.6336	9.0092	9.40484	12.438		7.50487	7.61677	7.12197	11.006	10.8762	6.75357	8.76225	8.0041	8.14744	5.57304
8.26412	7.47904	8.68471	8.91453	9.14497	8.0842	9.16447	9.14505	11.0251	12.9248		1.09749	1.10963	1.01509	1.14192	1.12072	1.01898	1.73258	1.04474	1.06529	1.06394		7.89991	9.25017	8.99392	8.62567	10.5837	7.57472	11.5342	9.04789	9.5104	12.3608		7.39824	7.86219	7.04663	10.9747	10.8197	6.74576	8.7923	7.98297	7.80801	5.71756
8.35342	7.48156	8.5583	8.91726	9.15544	7.96209	9.235	9.11331	10.9358	13.2312		1.09213	1.10713	1.01539	1.13692	1.10792	1.02221	1.72428	1.04064	1.0675	1.0634		7.9498	9.42006	8.74653	8.63382	10.6348	7.56641	11.567	9.034	9.40687	12.3101		7.43053	7.78772	7.05978	10.9933	10.9066	6.73744	8.81684	8.0251	7.76209	5.69024
8.48046	7.42114	8.59017	8.95235	9.14135	7.95221	9.25603	9.18022	10.8572	13.052		1.09458	1.10545	1.01566	1.14319	1.08465	1.02197	1.72113	1.04227	1.06514	1.06225		7.98387	9.18509	8.8364	8.66678	10.5831	7.57878	11.7813	8.99368	9.41982	12.6893		7.47914	7.85827	7.03459	11.0039	10.9048	6.75828	8.77688	7.87309	7.94063	5.6336
8.34449	7.46029	8.59241	8.95675	9.13619	7.96596	9.16054	9.16934	10.9234	13.3588		1.09026	1.10898	1.01447	1.14761	1.12678	1.01838	1.74964	1.03799	1.066	1.0642		7.97824	9.4494	8.92031	8.64156	10.5608	7.60042	11.4365	9.06691	9.48392	12.5003		7.40983	7.57852	7.01711	11.0001	10.9568	6.7981	8.78308	7.89471	7.92647	5.63312
8.35545	7.4516	8.59356	8.92439	9.14111	7.86589	9.28713	9.17338	10.8828	13.172		1.09856	1.10787	1.01579	1.13877	1.10119	1.02135	1.72831	1.03243	1.06544	1.06459		8.01217	9.37581	8.94798	8.6659	10.5321	7.57083	12.212	9.06546	9.35742	12.3569		7.48133	7.55173	7.0072	11.0424	10.9006	6.78162	8.89048	7.95343	7.87742	5.60621
8.47413	7.4616	8.6052	8.93895	9.12797	7.77417	9.23842	9.17075	10.8665	13.0215		1.08673	1.10655	1.01003	1.1409	1.10006	1.02122	1.74668	1.03058	1.06482	1.06433		8.8477	9.26697	9.06238	8.64703	10.5497	7.57017	12.1593	9.0573	9.33415	12.595		7.48529	7.4356	6.97182	10.975	10.9436	6.7784	8.83492	8.02514	7.94168	5.57778
8.43791	7.45744	8.57915	8.9211	9.12273	7.81945	9.25025	9.13665	10.8736	13.177		1.07969	1.10376	1.01322	1.13585	1.10314	1.02196	1.72806	1.03005	1.06454	1.06573		8.70403	9.18655	9.09062	8.67974	10.6312	7.63589	12.5047	8.99234	9.38946	12.5899		7.44531	7.4987	7.05235	11.0253	10.9563	6.80102	8.80565	8.03914	7.87473	5.69268
8.43406	7.459	8.5275	8.94659	9.13118	7.90032	9.23549	9.08177	10.9079	13.146		1.08992	1.10585	1.01659	1.14038	1.09915	1.02335	1.71002	1.02725	1.06414	1.06361		9.00139	9.39284	8.75502	8.67637	10.6812	7.55053	12.2848	8.9903	9.3753	12.4524		7.43461	7.55536	7.11186	11.0301	10.9094	6.77582	8.75102	8.09275	7.71115	5.65071
8.31713	7.46744	8.56822	8.92858	9.12165	7.86432	9.22328	9.12581	10.8874	13.1359		1.09065	1.10411	1.01529	1.13997	1.10983	1.02118	1.76152	1.02444	1.06444	1.06422		9.14751	9.15766	9.06311	8.64501	10.7455	7.55773	12.2206	9.05804	9.29042	12.577		7.45049	7.3579	7.10943	11.0276	11.0691	6.79288	8.85879	8.09001	7.81153	5.59662
8.36051	7.44266	8.55025	8.9472	9.11152	7.8258	9.23547	9.1527	10.8781	13.1168		1.08931	1.10511	1.0097	1.13439	1.11175	1.0238	1.75939	1.02756	1.06431	1.0639		8.81056	9.25476	9.15724	8.67502	10.7138	7.63588	12.467	8.99808	9.27754	12.6277		7.4066	7.35665	7.14848	10.978	10.9601	6.72842	8.82292	8.0858	7.88071	5.61714
8.47375	7.44492	8.62289	8.89404	9.08098	7.83992	9.20944	9.1196	10.9001	12.9744		1.09232	1.10776	1.00955	1.14027	1.10036	1.0267	1.79231	1.02725	1.06385	1.06528		9.09557	9.05242	8.89252	8.65785	10.736	7.54316	12.0461	8.97015	9.29079	12.4791		7.38783	7.46031	7.01672	11.0227	11.0097	6.76883	8.74471	8.04551	7.99831	5.56302
8.47003	7.41336	8.574	8.91622	9.09405	8.00523	9.24631	9.11181	10.8703	13.0861		1.09361	1.10543	1.01152	1.13699	1.12088	1.02453	1.73418	1.02341	1.06463	1.06444		9.26167	9.27482	9.02412	8.67788	10.7146	7.65341	12.491	9.03107	9.29004	12.4601		7.43607	7.43984	7.07873	11.0184	10.9867	6.7941	8.76415	8.10679	7.84508	5.65638
8.42154	7.4341	8.55689	8.91889	9.07938	7.94515	9.3028	9.13467	10.8855	12.9582		1.08619	1.1012	1.01555	1.13848	1.10754	1.02579	1.76744	1.02252	1.06375	1.0643		9.18568	9.07068	8.9066	8.6509	10.6454	7.4783	12.3938	9.01983	9.33094	12.5276		7.42673	7.54519	7.07178	11.0534	10.9184	6.74083	8.7416	8.07878	7.95033	5.60991
8.54772	7.41428	8.6166	8.88519	9.1069	7.91976	9.29266	9.04709	10.9167	13.1289		1.08795	1.10423	1.01411	1.14461	1.0953	1.02663	1.80024	1.02222	1.0632	1.06454		8.46664	9.12311	8.97849	8.64497	10.7561	7.54234	12.5734	9.0018	9.25397	12.3288		7.45428	7.5602	7.03982	11.0881	11.0094	6.73558	8.86159	8.09598	7.93248	5.6623
8.43988	7.4339	8.63118	8.85194	9.08883	7.95496	9.26504	9.09929	10.887	13.1062		1.09336	1.10083	1.0141	1.14293	1.11596	1.02658	1.75575	1.01992	1.06473	1.06301		8.3705	9.10637	8.88808	8.67771	10.7666	7.50425	12.4441	8.99068	9.24725	12.3141		7.44144	7.51402	7.08821	11.0929	10.9324	6.71529	8.77223	8.1371	8.14726	5.63669
8.49888	7.40708	8.59518	8.88156	9.08095	7.9083	9.28294	9.09841	10.8804	13.0805		1.08811	1.1016	1.01459	1.13916	1.11391	1.02679	1.79573	1.0234	1.06434	1.06322		8.02509	8.9535	9.04689	8.64962	10.7464	7.57056	12.3254	9.02443	9.331	12.5008		7.43926	7.50451	7.0994	11.1372	11.0687	6.77657	8.87448	8.1251	8.24078	5.58525
8.38729	7.42739	8.56709	8.84689	9.07253	7.7539	9.33256	9.06487	10.9166	13.0655		1.0881	1.10129	1.0097	1.13907	1.1027	1.02597	1.77651	1.02059	1.06357	1.06528		8.30891	9.20328	9.06559	8.64985	10.7459	7.51684	12.5869	9.01185	9.25116	12.3631		7.37356	7.20212	7.198	11.1616	10.9768	6.71307	8.76785	8.09153	8.04377	5.68769
8.42486	7.41906	8.67176	8.85489	9.0506	7.77634	9.35387	9.06562	10.8895	13.1861		1.08636	1.09851	1.01426	1.1424	1.10236	1.02327	1.72509	1.02419	1.06418	1.06528		8.30249	9.03051	8.97804	8.59945	10.761	7.5304	12.55	9.04926	9.25597	12.1912		7.45852	7.2999	7.09064	11.1621	10.9558	6.74407	8.85515	8.05267	8.22139	5.6
8.46759	7.41402	8.6413	8.84188	9.06164	7.82977	9.32934	9.10449	10.8788	13.0444		1.09274	1.09702	1.01315	1.13443	1.13556	1.0221	1.75652	1.02113	1.06376	1.06495		8.47411	8.97709	9.11979	8.59782	10.7641	7.56856	12.8589	9.02104	9.20463	12.2019		7.3711	7.47115	7.16356	11.1316	11.0176	6.71561	8.83901	8.07935	8.17378	5.55421
8.30222	7.43839	8.61232	8.84513	9.06908	7.81164	9.34516	9.0611	10.9327	13.0258		1.08942	1.09258	1.00884	1.13402	1.10564	1.02177	1.82455	1.02325	1.06458	1.06593		8.22836	9.13102	9.12152	8.57963	10.8201	7.52884	12.3608	9.06352	9.29912	12.1524		7.41328	7.38221	7.18569	11.1652	11.0126	6.80582	8.84803	8.13344	8.23352	5.68551
8.46395	7.4306	8.58479	8.82947	9.07921	7.83606	9.32227	9.01739	10.8744	12.8595		1.09316	1.08648	1.00861	1.13372	1.12729	1.02166	1.75939	1.02294	1.0653	1.06474		8.31386	9.14692	9.06794	8.5282	10.8282	7.48578	12.3081	9.03492	9.2446	12.1785		7.44668	7.40531	7.25808	11.1224	10.9833	6.81152	8.81016	8.06142	8.13809	5.52711
8.45571	7.3872	8.63254	8.83704	9.05236	7.68506	9.34965	9.06157	10.8929	12.9789		1.08726	1.09679	1.00825	1.1301	1.14787	1.02296	1.7511	1.02199	1.06418	1.06526		8.45612	8.96296	8.9096	8.48985	10.8019	7.52848	12.605	9.04224	9.21309	12.2022		7.36276	7.15942	7.20438	11.1148	10.9587	6.75644	8.82142	8.04315	8.23029	5.64614
8.33704	7.3981	8.6316	8.83019	9.0649	7.80159	9.35351	8.99562	10.8815	13.0166		1.09452	1.09908	1.01496	1.12857	1.14847	1.02339	1.8095	1.01964	1.06517	1.06597		8.26964	9.05856	8.87613	8.48909	10.7682	7.53059	12.2861	9.08433	9.17815	12.1299		7.46871	7.17321	7.37263	11.2049	10.9096	6.7889	8.8213	8.14066	8.21838	5.66198
8.38189	7.39864	8.56286	8.81445	9.02602	7.76391	9.35437	9.01451	10.8347	12.9864		1.0907	1.09457	1.01485	1.12846	1.11709	1.02567	1.80804	1.02258	1.06578	1.06551		8.44508	9.04029	8.89229	8.42444	10.7658	7.61287	12.7493	9.03551	9.23209	12.2818		7.43256	7.32825	7.14158	11.176	11.0113	6.79144	8.78788	8.01083	8.18298	5.62171
8.39017	7.36216	8.53337	8.82504	9.02928	7.83681	9.36706	9.05974	10.8314	12.9879		1.09607	1.09528	1.01221	1.13155	1.10867	1.02281	1.7893	1.01901	1.06594	1.06571		8.44595	8.90451	8.78639	8.43426	10.732	7.52951	12.4925	8.95063	9.2292	12.1205		7.44388	7.37913	7.20427	11.1221	10.958	6.71521	8.74008	8.09452	8.43132	5.71606
8.27275	7.36511	8.61893	8.8255	9.05261	7.96901	9.34349	9.02381	10.8478	13.1179		1.0976	1.0967	1.0091	1.13378	1.12298	1.02436	1.79286	1.02238	1.0655	1.06616		8.0201	8.89929	8.90835	8.39253	10.6212	7.51252	12.2493	8.97213	9.22223	12.0369		7.44223	7.10118	7.08342	11.0573	10.9301	6.73447	8.82776	8.04494	8.1599	5.50031
8.37337	7.36142	8.70488	8.8205	9.02715	7.88111	9.43046	9.00754	10.8146	12.9407		1.09206	1.09473	1.00974	1.13578	1.10468	1.0231	1.81889	1.01964	1.06582	1.06471		8.18006	9.14025	8.67827	8.36796	10.7192	7.55215	12.3652	9.03948	9.23493	12.1259		7.47142	7.31357	7.05107	11.0339	10.9259	6.74015	8.84378	8.06255	8.18019	5.61156
8.38493	7.34098	8.6778	8.81546	9.04126	7.94084	9.40987	9.02837	10.7601	12.9665		1.09559	1.09433	1.01415	1.1326	1.10197	1.02369	1.81192	1.02182	1.065	1.06485		8.01819	8.91993	8.96756	8.36159	10.6208	7.60791	11.7754	9.04513	9.1833	12.0746		7.42324	7.40452	6.8866	11.0638	10.9973	6.74246	8.7663	8.00152	8.19317	5.68618
8.54305	7.34229	8.55265	8.81055	9.04137	7.81897	9.40966	8.96889	10.8454	12.9205		1.09552	1.09404	1.0111	1.13169	1.10259	1.02363	1.79992	1.02223	1.06426	1.06538		7.91583	8.94649	9.07433	8.35225	10.6651	7.47829	11.8366	8.99636	9.25746	12.176		7.39098	7.12854	6.77645	11.0287	10.9491	6.70168	8.74587	8.04595	8.17949	5.60825
8.29448	7.33632	8.70821	8.8039	8.9974	7.81623	9.41272	9.00056	10.801	12.782		1.09236	1.09769	1.0079	1.13487	1.09837	1.02277	1.8252	1.02252	1.06818	1.06524		8.0591	8.69742	8.99724	8.3646	10.6975	7.51827	11.3665	9.04374	9.19474	12.2891		7.4484	7.33102	6.7229	11.0372	10.9221	6.79489	8.846	8.00866	8.07338	5.44655
8.44719	7.34616	8.63087	8.81623	9.0296	7.76796	9.37515	8.99753	10.7755	12.9423		1.09218	1.10035	1.01334	1.13609	1.10527	1.0203	1.78569	1.02275	1.06663	1.06519		8.02265	8.85045	9.12079	8.34385	10.6165	7.52234	11.9665	8.96133	9.1761	12.3413		7.41927	7.41549	6.52713	11.0197	10.9363	6.7663	8.80748	7.98986	7.99962	5.59273
8.35176	7.31925	8.55538	8.80293	9.03223	7.8092	9.3568	8.96786	10.7551	12.9022		1.10017	1.09638	1.01051	1.13457	1.11186	1.02182	1.78047	1.02269	1.0669	1.06663		7.73745	8.96111	9.0665	8.32791	10.6665	7.57173	11.9185	9.01542	9.16487	12.5092		7.48308	7.19752	6.48817	10.9605	10.8413	6.74664	8.82643	7.94953	8.11231	5.5718
8.43144	7.32955	8.49291	8.79436	9.01347	7.77516	9.37586	8.97394	10.717	12.9039		1.09158	1.09985	1.0133	1.13495	1.11789	1.02083	1.83456	1.02216	1.06573	1.0656		8.54618	8.93445	9.05498	8.35545	10.7042	7.51292	11.9125	8.92672	9.24833	12.5423		7.43661	7.19487	6.76537	10.9396	10.8352	6.71744	8.7329	7.93108	7.71559	5.61589
8.38475	7.32756	8.52526	8.83039	8.97342	7.79356	9.38133	8.98556	10.7042	12.8997		1.08655	1.0963	1.01086	1.13729	1.10353	1.02252	1.86077	1.02042	1.06358	1.06603		7.85437	8.80166	8.76438	8.34273	10.6569	7.51847	12.3574	8.99364	9.21032	12.4369		7.41378	7.39346	6.94414	10.9482	10.8145	6.78634	8.81018	7.99727	7.8898	5.58754
8.31286	7.31141	8.52252	8.80158	8.98678	7.74071	9.37759	8.94111	10.7082	13.0305		1.09832	1.10118	1.00597	1.13385	1.12479	1.02277	1.85545	1.02229	1.06304	1.06652		8.43613	8.95779	9.21777	8.32793	10.6265	7.49473	12.5075	9.00742	9.14459	12.5696		7.43593	7.09131	7.14132	10.9254	10.8197	6.76932	8.72724	7.90942	8.10569	5.55146
8.31808	7.30834	8.56637	8.78785	8.99737	7.70809	9.39105	8.94297	10.6971	12.86		1.09733	1.10292	1.01208	1.13624	1.10909	1.02588	1.83351	1.02223	1.06268	1.06664		8.16483	8.93933	9.02861	8.35361	10.6597	7.54003	12.4855	8.92618	9.17465	12.5639		7.47246	6.99149	7.21037	10.8956	10.9345	6.77064	8.72379	7.93218	7.90711	5.54377
8.3164	7.30708	8.47984	8.78633	8.98019	7.71562	9.38066	8.96907	10.6892	12.8849		1.08637	1.10059	1.00997	1.13014	1.1085	1.02513	1.85368	1.02234	1.06272	1.06742		7.95815	8.75444	9.15284	8.33366	10.6075	7.50276	12.1289	8.95507	9.16165	12.5693		7.37386	7.38344	7.21051	10.91	10.8841	6.70034	8.80775	7.86134	7.89204	5.50614
8.41044	7.30254	8.64838	8.79669	8.99492	7.79215	9.38541	8.91802	10.7213	12.8085		1.0832	1.10548	1.01153	1.13918	1.13637	1.02011	1.87062	1.0217	1.06393	1.0665		8.21802	8.83369	8.62107	8.29328	10.5528	7.46389	12.5945	8.93597	9.17058	12.4873		7.40252	7.2495	7.09517	10.8968	10.8593	6.75587	8.71214	7.9101	7.87726	5.49174
8.39761	7.29398	8.67129	8.79219	8.97773	7.81352	9.44556	8.93581	10.6867	12.8293		1.09065	1.09838	1.01154	1.13953	1.13334	1.0249	1.85774	1.02239	1.06362	1.06674		7.98318	9.00021	8.91602	8.31827	10.7056	7.55377	12.7165	8.91648	9.1559	12.5042		7.46362	7.3018	7.33613	10.8895	10.8505	6.75556	8.74779	7.90446	7.8253	5.55159
8.38801	7.29131	8.56736	8.79033	8.9496	7.77508	9.40716	8.97351	10.6813	12.8452		1.09564	1.094	1.00823	1.13913	1.12444	1.02463	1.84027	1.02187	1.06394	1.06747		8.25741	8.73721	8.92618	8.28611	10.5722	7.50663	12.5224	8.92597	9.11271	12.4443		7.33767	7.12284	7.27873	10.8777	10.9206	6.77144	8.72556	7.89119	7.7806	5.51724
8.32231	7.27708	8.50116	8.80222	8.96702	7.84154	9.42256	8.92912	10.6848	12.7647		1.0972	1.09323	1.00964	1.13945	1.1206	1.02032	1.9358	1.02148	1.06182	1.06834		8.1601	8.75901	9.21342	8.27044	10.6721	7.40287	12.1242	8.89748	9.10405	12.359		7.46033	7.27841	7.30336	10.8659	10.8916	6.74871	8.70989	7.9365	7.85358	5.54841
8.38986	7.26361	8.45455	8.80797	8.95899	7.86778	9.32802	8.91689	10.7007	12.918		1.09656	1.10525	1.00993	1.14224	1.09227	1.02193	1.85412	1.0202	1.0632	1.06757		7.93509	8.86993	8.66198	8.29183	10.5402	7.4361	12.3079	8.91808	9.15086	12.4214		7.50252	7.31461	7.22117	10.8524	10.874	6.74337	8.75737	7.93622	8.02256	5.57585
8.25875	7.27742	8.49014	8.81246	8.97379	7.83328	9.35234	8.9511	10.6717	12.8989		1.08775	1.10251	1.0123	1.14416	1.09979	1.02077	1.82904	1.02059	1.05959	1.06728		7.96637	8.87714	8.95453	8.27906	10.5542	7.40205	12.6558	8.91015	9.13509	12.3809		7.36549	7.29675	7.17625	10.8412	10.9621	6.71253	8.72476	7.93975	7.98331	5.61389
8.40857	7.28225	8.51789	8.81049	8.96889	7.88016	9.26923	8.91932	10.6987	12.6277		1.09782	1.09651	1.01224	1.14752	1.10856	1.02166	1.83378	1.02264	1.06089	1.06694		8.55127	8.77913	8.86606	8.29272	10.6834	7.49912	12.7729	8.96221	9.10531	12.2973		7.3678	7.36219	7.11622	10.8463	10.853	6.715	8.81463	7.96057	7.8853	5.61346
8.41894	7.28537	8.47774	8.80332	8.97297	7.6923	9.2773	8.94017	10.7257	12.8156		1.09687	1.09744	1.01197	1.14456	1.13729	1.01924	1.77138	1.01994	1.05918	1.06781		8.01188	8.697	8.94809	8.27115	10.5921	7.49665	12.6567	8.95423	9.20306	12.3276		7.50007	7.04518	7.26111	10.8605	10.8709	6.75136	8.77219	7.92183	8.01737	5.59775
8.32604	7.27322	8.43911	8.82116	8.9639	7.82134	9.31202	8.92416	10.7396	12.7319		1.09498	1.09443	1.0082	1.14492	1.11245	1.02172	1.82622	1.01986	1.05787	1.06589		8.14604	8.7988	9.0812	8.26622	10.642	7.45295	12.6674	8.99835	9.17483	12.3009		7.46466	7.30099	7.22075	10.8906	10.9142	6.73876	8.81159	7.97438	7.99366	5.5071
8.32005	7.27116	8.59832	8.81792	8.95135	7.76126	9.30093	8.88374	10.7684	12.7563		1.0956	1.09707	1.00669	1.14193	1.12014	1.02076	1.89874	1.02059	1.06082	1.06604		8.05006	8.61962	9.24359	8.23954	10.5813	7.4527	12.5929	8.99392	9.07767	12.4292		7.40235	6.96759	7.23723	10.8643	10.8366	6.67365	8.76203	7.96421	7.96562	5.49651
8.34282	7.24409	8.54762	8.81089	8.95742	7.7205	9.2364	8.86265	10.7778	12.7242		1.09778	1.09672	1.0126	1.14165	1.13011	1.01851	1.816	1.02033	1.05947	1.06662		8.11702	8.588	9.2832	8.24854	10.5808	7.47976	12.4306	8.99243	9.08856	12.3696		7.41766	7.07833	7.32366	10.8499	10.9454	6.71141	8.71327	7.91173	7.90562	5.58275
8.49691	7.24971	8.51639	8.82721	8.94607	7.73704	9.3042	8.89852	10.8119	12.7423		1.09475	1.09099	1.01197	1.14643	1.12264	1.02128	1.87953	1.02075	1.06076	1.06775		8.25734	8.73282	8.88143	8.22442	10.5974	7.40065	12.7697	9.02195	9.12615	12.2314		7.34364	7.03621	7.30649	10.8752	10.8428	6.80039	8.71657	7.94147	8.04042	5.55879
8.31223	7.2309	8.48141	8.83074	8.94195	7.77362	9.37793	8.84584	10.8282	12.6571		1.10053	1.0936	1.00628	1.13914	1.1287	1.02111	1.85838	1.02068	1.06201	1.06822		8.45047	8.64733	9.1959	8.18169	10.5865	7.41755	12.9168	9.02425	9.09814	12.2305		7.42624	7.14581	7.36734	10.8362	10.9001	6.69775	8.73785	7.97741	8.00662	5.53244
8.43961	7.24281	8.43542	8.83897	8.94232	7.82892	9.38215	8.85702	10.8133	12.7692		1.0957	1.09007	1.01257	1.14366	1.13512	1.01976	1.83118	1.02093	1.06085	1.06757		8.32563	8.6024	8.82898	8.16872	10.5713	7.4517	12.7146	9.01435	9.10883	12.2821		7.42378	6.80115	7.3241	10.8389	10.8505	6.73415	8.69235	7.95447	7.8547	5.51407
8.3354	7.25716	8.50216	8.82255	8.94039	7.79267	9.30062	8.88801	10.7917	12.7066		1.09535	1.0952	1.01122	1.13938	1.10513	1.02196	1.83834	1.02024	1.06165	1.06541		8.28474	8.83404	8.94914	8.1558	10.5641	7.46285	12.4809	9.01141	9.07117	12.1946		7.40771	6.90695	7.37585	10.8749	10.8192	6.7347	8.69668	7.91148	8.01554	5.394
8.482	7.24758	8.45727	8.8305	8.93433	7.71098	9.26531	8.85409	10.8278	12.547		1.09624	1.09324	1.01224	1.13873	1.12765	1.02076	1.8492	1.02013	1.06303	1.06731		7.96926	8.73963	9.24576	8.16303	10.5481	7.51356	12.3452	9.02768	9.14293	12.2617		7.40763	7.30372	7.34041	10.8507	10.864	6.73651	8.7671	7.92836	7.94805	5.52825
8.3526	7.24437	8.45895	8.82258	8.94267	7.77186	9.29197	8.8319	10.7434	12.5586		1.09562	1.09452	1.00878	1.14108	1.12906	1.01619	1.87377	1.01984	1.06093	1.06697		8.4294	8.68787	9.03947	8.14107	10.5216	7.44304	12.6669	9.06543	9.12395	12.3737		7.49647	6.95873	7.34555	10.8582	10.8645	6.71789	8.71438	7.92305	7.89789	5.58289
8.40204	7.26183	8.58817	8.81927	8.92036	7.81696	9.28434	8.89569	10.7521	12.5015		1.09573	1.08918	1.01126	1.13598	1.0788	1.02326	1.8843	1.02102	1.0599	1.06577		8.0979	8.78295	9.15272	8.12661	10.5151	7.38418	12.7262	9.0447	9.11444	12.3106		7.44955	7.12589	7.48433	10.8337	10.8372	6.70053	8.80832	7.93927	8.06683	5.43688
8.3177	7.23325	8.41273	8.82329	8.89497	7.79854	9.31978	8.80523	10.7216	12.6601		1.10233	1.0917	1.01231	1.1356	1.11285	1.02169	1.86272	1.02069	1.06178	1.0688		8.22747	8.76294	9.05269	8.09785	10.4916	7.42756	12.255	9.03515	9.00447	12.3519		7.38089	6.80133	7.47489	10.8046	10.9143	6.75158	8.75682	7.95712	8.11791	5.6006
8.54581	7.24642	8.448	8.82493	8.90197	7.79846	9.27159	8.80828	10.7213	12.673		1.09758	1.0908	1.01029	1.13946	1.12757	1.02287	1.89285	1.01962	1.06043	1.06805		8.35506	8.64077	8.86572	8.14138	10.5173	7.40701	12.2462	9.06403	9.12804	12.4351		7.49444	7.21196	7.40422	10.8376	10.9979	6.79071	8.70736	7.90123	8.06963	5.56162
8.31126	7.24275	8.54923	8.79869	8.89263	7.79052	9.26686	8.85097	10.6735	12.6229		1.10233	1.09038	1.01248	1.13713	1.13118	1.01853	1.8904	1.02008	1.06052	1.06894		8.29985	8.74552	8.70163	8.11101	10.5623	7.4212	12.113	8.98843	9.08488	12.4758		7.46663	7.05217	7.44554	10.8157	10.8785	6.7226	8.66519	7.91697	7.97485	5.59524
8.19797	7.21899	8.3947	8.81458	8.89898	7.88334	9.25482	8.80095	10.7305	12.6374		1.10056	1.09378	1.00978	1.13499	1.13006	1.01815	1.93195	1.02177	1.06035	1.06684		8.08076	8.62825	8.78409	8.11966	10.6258	7.43286	11.6961	9.02619	9.12337	12.6582		7.41556	6.84618	7.48327	10.8446	10.9473	6.70401	8.78769	7.85701	8.0489	5.46613
8.39277	7.22567	8.5138	8.7979	8.88773	7.92816	9.29547	8.80212	10.6634	12.64		1.09792	1.09292	1.01353	1.13655	1.12559	1.01832	1.89064	1.01923	1.06064	1.06843		8.00142	8.46379	9.10848	8.12439	10.6592	7.51447	11.7605	8.95559	9.09754	12.7065		7.45549	7.14818	7.41392	10.844	11.0168	6.72734	8.67696	7.78518	7.96753	5.4806
8.29738	7.24482	8.45502	8.79785	8.87786	7.82393	9.28611	8.85169	10.6296	12.8739		1.09773	1.09006	1.01281	1.13563	1.11676	1.02072	1.91567	1.01814	1.0612	1.06645		7.97963	8.61469	9.21941	8.07704	10.7082	7.38911	11.741	8.90476	9.01605	12.5675		7.4853	7.11287	7.44879	10.8385	11.0571	6.76163	8.78707	7.83186	8.22317	5.46995
8.41008	7.21326	8.555	8.79055	8.87226	7.83962	9.27535	8.79657	10.6628	12.6089		1.0972	1.09317	1.01143	1.13682	1.11249	1.01579	1.8947	1.02046	1.06011	1.06773		8.17464	8.61513	9.10817	8.10121	10.7059	7.45491	11.8811	8.93346	9.01212	12.6858		7.4866	6.97555	7.39152	10.8481	10.9657	6.75325	8.69788	7.85241	8.09878	5.48207
8.38041	7.20957	8.52932	8.77008	8.87545	7.98552	9.30478	8.81246	10.6243	12.589		1.09296	1.09523	1.01297	1.14101	1.12574	1.01314	1.8831	1.01725	1.06256	1.06771		7.83434	8.72197	9.13909	8.10776	10.7558	7.4354	11.6182	8.95079	9.11706	12.9733		7.54471	7.22086	7.35902	10.9227	10.9344	6.70928	8.66686	7.83954	8.19595	5.5445
8.46093	7.18866	8.43953	8.78266	8.86081	7.91571	9.2779	8.83426	10.6272	12.5626		1.0921	1.08886	1.01163	1.13659	1.11682	1.01691	1.89994	1.01858	1.06165	1.06887		8.49252	8.48984	8.911	8.0987	10.6208	7.35347	12.0904	8.89785	9.06851	12.7705		7.56035	7.10551	7.3399	10.9975	10.9926	6.72239	8.69058	7.90032	8.37317	5.52367
8.34518	7.17976	8.48618	8.77876	8.86674	7.88645	9.317	8.77949	10.6297	12.5672		1.09286	1.09548	1.00543	1.13668	1.10982	1.01673	1.90136	1.02063	1.06285	1.0679		7.97719	8.76688	8.73948	8.08218	10.5933	7.43176	12.3797	8.88674	9.05754	12.6894		7.43678	7.06001	7.41764	10.9707	11.0189	6.69336	8.70311	7.87168	8.49503	5.50949
8.35919	7.17833	8.53843	8.77377	8.86265	7.94707	9.29794	8.74618	10.5911	12.5189		1.08665	1.09549	1.01157	1.12831	1.09476	1.01599	1.92476	1.01822	1.0632	1.06968		8.08022	8.77561	8.84595	8.08492	10.6349	7.47892	12.4335	8.85168	9.06438	12.8915		7.59677	7.13545	7.224	10.9688	10.997	6.72296	8.6484	7.87162	8.22946	5.49601
8.45733	7.16695	8.42727	8.75155	8.86254	8.04275	9.3096	8.81808	10.5869	12.4949		1.08996	1.09851	1.01019	1.13684	1.09861	1.01311	1.90132	1.01774	1.06283	1.06924		7.79763	8.57261	8.8712	8.06192	10.6286	7.42702	12.764	8.89259	9.10984	12.656		7.53366	6.68417	7.01796	10.9683	10.9	6.70638	8.70981	7.97056	8.28376	5.50195
8.36163	7.16578	8.46365	8.76466	8.85672	7.90483	9.33236	8.76593	10.6045	12.6325		1.09277	1.1011	1.01313	1.1367	1.11751	1.01259	1.88591	1.02006	1.06419	1.06885		8.28209	8.71142	8.78896	8.05192	10.5311	7.50963	12.581	8.87253	9.06615	12.5412		7.46799	7.04069	6.7374	10.9539	10.9631	6.7083	8.7326	7.90727	8.40757	5.5599
8.31462	7.16148	8.38332	8.75621	8.84587	7.99453	9.33984	8.76246	10.5206	12.4491		1.09059	1.09275	1.01103	1.13285	1.11989	1.01457	1.93749	1.01946	1.06431	1.06784		8.28049	8.6314	8.8476	8.04661	10.5186	7.35422	12.2116	8.90906	9.02585	12.6103		7.55224	6.7524	6.72499	10.9735	10.9363	6.71159	8.76111	7.94538	8.09481	5.44244
8.47009	7.15466	8.43501	8.7386	8.8369	8.0191	9.30292	8.78577	10.5451	12.4666		1.09199	1.09425	1.01503	1.13878	1.11498	1.017	1.95934	1.02002	1.06375	1.06998		8.46276	8.38629	8.99145	8.02106	10.546	7.36109	12.9751	8.8835	9.08247	12.6967		7.57743	7.28527	6.70185	10.9928	10.8537	6.73651	8.68848	7.8503	8.47478	5.52609
8.47669	7.1411	8.45527	8.7337	8.86067	7.9351	9.27468	8.75336	10.5591	12.6276		1.09718	1.09891	1.01222	1.13651	1.10098	1.02145	1.87661	1.01767	1.06639	1.0691		8.51593	8.63144	8.60292	8.02497	10.4494	7.44956	12.6103	8.84535	9.10616	12.3491		7.46513	7.18891	6.98238	10.9835	10.8688	6.68586	8.71642	7.9101	8.3408	5.48749
8.31885	7.13502	8.52108	8.72406	8.85976	7.97763	9.34368	8.76307	10.5136	12.4179		1.09468	1.10154	1.00926	1.1374	1.1146	1.01802	1.95398	1.01752	1.06889	1.06889		8.81465	8.64022	9.03091	8.01203	10.3893	7.44672	12.6565	8.8277	9.08363	12.3829		7.56488	6.86884	7.4609	10.9589	10.8645	6.66566	8.73322	7.9396	8.09521	5.4567
8.3508	7.13406	8.48326	8.72743	8.8448	7.96569	9.30048	8.78502	10.5024	12.5738		1.09664	1.09204	1.01239	1.13416	1.10784	1.02226	1.89155	1.01782	1.07179	1.0688		8.81025	8.49286	8.70646	7.97668	10.4387	7.33129	12.3571	8.79681	9.03445	12.4552		7.58556	6.99595	7.4098	10.9286	10.8774	6.72007	8.7054	7.94578	8.37638	5.48999
8.57304	7.13379	8.52069	8.73636	8.85419	7.92864	9.31512	8.72707	10.5747	12.4421		1.10095	1.09872	1.01006	1.13247	1.13567	1.02115	1.97548	1.01887	1.07492	1.06916		8.6142	8.71903	8.92544	7.98494	10.4372	7.41491	12.8619	8.86698	9.06766	12.2654		7.48468	6.75842	7.37228	10.8744	10.8392	6.77496	8.75033	7.87882	8.3161	5.52776
8.332	7.12806	8.48181	8.73663	8.84878	7.89874	9.29572	8.72439	10.5621	12.414		1.09823	1.09841	1.00639	1.131	1.10853	1.02156	1.94845	1.01897	1.07566	1.06925		9.09069	8.3782	9.08531	7.95034	10.3755	7.44706	12.9708	8.83837	9.011	12.4879		7.52528	7.10287	7.41347	10.874	10.8344	6.70585	8.69581	7.8122	8.07497	5.43554
8.38513	7.13336	8.43291	8.71466	8.80788	7.92897	9.28441	8.76636	10.5376	12.4976		1.09546	1.09524	1.01134	1.12857	1.09357	1.01868	1.8761	1.01666	1.07849	1.0709		8.73418	8.67516	9.01134	7.97821	10.3967	7.40575	12.7642	8.8711	8.96444	12.5264		7.59381	7.08463	7.49478	10.8404	10.7927	6.75323	8.65388	7.80459	8.0531	5.48843
8.35818	7.14033	8.47411	8.71397	8.8387	7.97398	9.37074	8.73574	10.5703	12.4076		1.10255	1.10182	1.01189	1.131	1.0957	1.01663	1.90818	1.01904	1.07819	1.06859		9.29319	8.56738	8.94355	7.9981	10.4428	7.44261	12.7713	8.74933	9.07379	12.3073		7.54877	7.00536	7.44532	10.8078	10.8594	6.72448	8.67427	7.79156	8.07165	5.43422
8.344	7.13481	8.4472	8.73185	8.81681	7.95322	9.37637	8.68076	10.6091	12.2539		1.09868	1.10327	1.01448	1.1294	1.13384	1.02158	1.93654	1.01936	1.08176	1.06855		9.40478	8.33039	9.07546	7.99523	10.3622	7.38121	12.3612	8.92308	8.95585	12.3544		7.55057	7.15995	7.42456	10.7795	10.8266	6.72722	8.68515	7.75957	8.00124	5.45885
8.4094	7.14045	8.45731	8.71758	8.79626	8.01635	9.37853	8.72936	10.5654	12.3259		1.09152	1.09999	1.01079	1.1285	1.08686	1.02046	1.95843	1.01692	1.0821	1.0684		9.12298	8.45897	9.35611	7.98524	10.3567	7.39199	12.7287	8.87081	9.08667	12.543		7.5966	7.07668	7.52944	10.7662	10.8924	6.69377	8.7092	7.71102	8.09256	5.51328
8.46344	7.13235	8.50646	8.72351	8.80724	7.98158	9.36957	8.71712	10.6128	12.3576		1.08778	1.10169	1.01072	1.12475	1.13423	1.0169	1.93343	1.01581	1.08478	1.0686		8.55121	8.43465	8.94057	7.98838	10.3194	7.42369	12.5782	8.84816	8.99388	12.4236		7.5783	6.97396	7.54653	10.7759	10.8561	6.72648	8.76313	7.7009	7.90644	5.46278
8.44648	7.12074	8.47683	8.72701	8.81994	7.98608	9.37317	8.68688	10.6111	12.4968		1.08801	1.10473	1.01235	1.12184	1.12797	1.01298	1.95389	1.01873	1.08449	1.06696		8.37887	8.55518	8.73746	7.98235	10.4537	7.45182	12.4573	8.89478	9.01411	12.4907		7.58256	6.768	7.54291	10.7405	10.8482	6.69319	8.61106	7.66986	7.85824	5.53461
8.45698	7.14279	8.44116	8.71239	8.8139	7.87578	9.41407	8.71422	10.5878	12.3063		1.09786	1.10142	1.01058	1.11952	1.11583	1.02075	1.93016	1.01591	1.08449	1.06872		8.31373	8.47576	8.82865	8.01563	10.3858	7.41408	12.387	8.80604	9.00919	12.6108		7.56502	6.93859	7.60354	10.7195	10.8314	6.69548	8.63776	7.71502	7.92744	5.3779
8.25572	7.10993	8.54329	8.71273	8.8106	7.94196	9.39707	8.70684	10.5904	12.4664		1.09614	1.09373	1.01009	1.1211	1.10072	1.01817	1.90823	1.01582	1.08279	1.06902		8.72013	8.6048	8.74069	8.02701	10.3524	7.44951	12.6618	8.85218	9.05454	12.5209		7.56694	6.83809	7.54799	10.689	10.8596	6.71943	8.6593	7.70602	7.87404	5.44129
8.41521	7.10407	8.45149	8.71408	8.79468	7.99418	9.4419	8.65428	10.6159	12.4245		1.10037	1.09815	1.0096	1.11543	1.13652	1.0159	2.0186	1.01598	1.08497	1.06748		8.36556	8.53527	8.92684	8.03698	10.4499	7.36447	11.8964	8.86562	8.98536	12.5523		7.54138	6.95126	7.5613	10.6747	10.8432	6.7253	8.67468	7.64523	7.86136	5.42246
8.44595	7.11285	8.49133	8.71786	8.8101	7.93854	9.44708	8.69586	10.5945	12.2583		1.09502	1.09757	1.01266	1.1243	1.09527	1.01429	1.94878	1.01621	1.08358	1.06655		8.5164	8.3214	8.69088	8.0478	10.3705	7.32051	11.8306	8.92179	9.03235	12.6293		7.56593	6.92526	7.61083	10.6543	10.8955	6.71633	8.65508	7.69948	7.87841	5.39684
8.28047	7.10697	8.50644	8.71342	8.79468	7.94967	9.45178	8.67048	10.5944	12.4209		1.08708	1.09689	1.01089	1.12132	1.1092	1.01783	1.98787	1.01612	1.08265	1.06832		8.42211	8.47685	8.82642	8.04562	10.3746	7.38369	11.5696	8.86259	9.01815	12.7514		7.62885	6.85127	7.55979	10.6425	10.9122	6.74445	8.64009	7.71539	8.07923	5.43321
8.25937	7.09731	8.51014	8.70162	8.80241	7.98362	9.42467	8.66788	10.6597	12.4216		1.09868	1.09493	1.0122	1.12041	1.12754	1.01149	1.96249	1.0144	1.08451	1.06925		8.23591	8.635	8.95579	8.01999	10.2746	7.35993	11.7741	8.94256	9.03455	12.6793		7.6563	6.72903	7.52469	10.6507	11.0033	6.64698	8.6321	7.70877	7.81569	5.32764
8.35276	7.10537	8.4493	8.69828	8.79811	7.94649	9.42812	8.7167	10.6821	12.2453		1.09829	1.08945	1.01182	1.1212	1.12166	1.0187	1.99645	1.01155	1.08481	1.07063		8.46179	8.44364	9.23392	8.02962	10.4202	7.3219	11.8374	8.94897	9.07215	12.8329		7.5978	6.82245	7.58096	10.6733	10.9843	6.67183	8.65422	7.72346	7.842	5.49465
8.35395	7.1144	8.51218	8.71096	8.77376	7.88055	9.46017	8.65714	10.5636	12.332		1.09352	1.093	1.01425	1.12307	1.11869	1.01483	2.02664	1.01367	1.08428	1.06865		8.44501	8.50357	8.94208	8.02068	10.421	7.36647	11.9146	8.95859	8.96788	12.7502		7.59741	6.92931	7.60985	10.6833	11.0024	6.69184	8.66979	7.70799	8.09351	5.37083
8.39681	7.08316	8.45882	8.69683	8.78451	7.86078	9.49093	8.66036	10.5859	12.5261		1.08926	1.08282	1.01138	1.11858	1.1473	1.01831	1.96344	1.01465	1.08367	1.0692		8.70499	8.29452	8.84421	7.99118	10.4507	7.36589	12.3102	8.97096	8.95093	12.6834		7.59412	6.84621	7.58814	10.7022	10.9217	6.64169	8.62794	7.728	8.00467	5.39922
8.32356	7.09388	8.53179	8.70798	8.78231	7.8897	9.48968	8.67955	10.6403	12.218		1.08917	1.08672	1.00636	1.1173	1.11636	1.01697	2.013	1.01596	1.08437	1.06947		8.53137	8.59445	8.7762	7.98927	10.5012	7.36034	12.0296	8.88329	9.05441	12.7503		7.65152	6.91799	7.70762	10.6506	10.9643	6.61958	8.66018	7.73677	8.03205	5.40957
8.35133	7.10048	8.48456	8.68756	8.77327	7.95873	9.51134	8.6675	10.643	12.2255		1.09799	1.09506	1.01125	1.11937	1.10508	1.01551	1.98518	1.01441	1.08269	1.07051		8.41195	8.38948	8.85466	7.98666	10.5067	7.35453	12.4018	8.98768	8.96095	12.7361		7.65515	6.86323	7.61107	10.6774	10.9386	6.69604	8.64683	7.80769	8.00913	5.51645
8.25484	7.06159	8.46935	8.69237	8.76263	7.98659	9.49359	8.6129	10.6558	12.1991		1.0965	1.09456	1.00998	1.1147	1.0988	1.01701	2.00917	1.01474	1.08235	1.06936		8.80855	8.37919	8.66122	7.98337	10.4747	7.35969	12.4189	8.88987	9.01359	12.7517		7.66914	6.71657	7.66985	10.6992	10.9441	6.71777	8.66982	7.75026	8.15322	5.48045
8.30706	7.0736	8.545	8.6942	8.79238	7.97926	9.48775	8.63821	10.6566	12.2856		1.08842	1.09585	1.01082	1.11296	1.09681	1.0228	2.00575	1.01493	1.08033	1.06957		8.28842	8.31774	8.99739	7.93685	10.4947	7.30377	12.9099	8.93003	9.03562	12.6416		7.64221	6.968	7.60211	10.6635	11.0016	6.69484	8.65967	7.77816	7.79348	5.38223
8.31876	7.10262	8.4167	8.68519	8.76591	7.91937	9.49277	8.63686	10.6418	12.336		1.08523	1.09198	1.00965	1.11396	1.10903	1.02215	2.01272	1.01431	1.07884	1.07005		8.3644	8.4176	9.1113	7.91865	10.4973	7.34963	12.2911	8.9392	9.02182	12.567		7.68207	6.79776	7.58297	10.6625	10.8488	6.67747	8.65624	7.78881	8.07958	5.33444
8.32706	7.04198	8.44707	8.68115	8.76336	7.96166	9.46637	8.60656	10.568	12.0074		1.09068	1.09387	1.01253	1.11801	1.11755	1.02007	2.04855	1.01329	1.07659	1.07016		8.31546	8.4298	8.88994	7.91059	10.4929	7.3173	12.4219	8.96636	8.88402	12.4598		7.67324	6.90801	7.66496	10.6729	11.0129	6.63442	8.61574	7.71392	8.15348	5.42939
8.31647	7.05786	8.42989	8.67926	8.78373	7.98777	9.4315	8.6525	10.6177	12.1494		1.08436	1.09628	1.01293	1.11792	1.12091	1.02418	2.02505	1.01391	1.07493	1.06959		8.17414	8.4563	8.62694	7.9143	10.5513	7.40927	12.6539	8.88385	8.96234	12.5011		7.67855	6.86242	7.71028	10.6744	10.8786	6.67402	8.68908	7.85199	8.20559	5.36268
8.39137	7.05234	8.4855	8.67504	8.77283	7.90902	9.42454	8.62778	10.5571	12.1512		1.08623	1.09462	1.01658	1.12037	1.11583	1.02626	1.95418	1.01653	1.07276	1.06932		8.47231	8.47299	8.77965	7.9124	10.5235	7.4425	12.6104	8.89057	8.93135	12.4515		7.63246	6.99031	7.67032	10.6921	10.8244	6.66013	8.66906	7.78357	8.20572	5.37807
8.30681	7.05046	8.40326	8.65793	8.73236	7.9171	9.42887	8.6025	10.5404	12.2883		1.08886	1.08851	1.01381	1.11696	1.09126	1.0272	2.05181	1.01357	1.07087	1.07057		8.06624	8.47983	8.97437	7.9127	10.5488	7.37714	13.1856	8.87196	8.99094	12.4896		7.73067	7.00172	7.66837	10.6822	10.8914	6.67263	8.62078	7.72112	8.0896	5.37513
8.23848	7.05147	8.51897	8.66359	8.7567	7.93962	9.40857	8.61047	10.6166	12.2757		1.09025	1.08482	1.01803	1.12584	1.12792	1.02835	1.99386	1.01342	1.06946	1.07043		8.31297	8.35333	8.87357	7.90928	10.5159	7.34491	12.895	8.88476	8.98768	12.5277		7.70094	6.63723	7.61098	10.6744	10.8979	6.68513	8.6359	7.84391	8.03717	5.44428
8.34059	7.05088	8.51859	8.65979	8.7403	7.89322	9.35247	8.58615	10.5941	12.1323		1.08412	1.08814	1.0056	1.12541	1.10791	1.02955	1.99691	1.01582	1.06742	1.06966		8.33238	8.32492	8.78058	7.88947	10.4802	7.43325	12.5908	8.90058	8.90517	12.5278		7.78809	6.79774	7.50885	10.6663	10.9375	6.64348	8.58529	7.79922	8.16963	5.42359
8.30028	7.04968	8.38231	8.66471	8.73504	7.91991	9.36505	8.58351	10.5392	12.0918		1.0822	1.08349	1.00556	1.134	1.10637	1.02985	2.06907	1.01581	1.06547	1.06976		8.39076	8.35549	8.74817	7.90318	10.4592	7.32081	12.6171	8.83573	8.97155	12.4574		7.73318	6.76341	7.48684	10.7559	10.8309	6.62577	8.66366	7.75761	8.12909	5.37115
8.3754	7.03961	8.40804	8.6478	8.73855	7.92016	9.32025	8.60653	10.532	12.1001		1.08874	1.08634	1.01154	1.1298	1.11782	1.02692	2.01482	1.01529	1.06461	1.07074		8.17449	8.38809	8.49623	7.90179	10.4491	7.3609	12.6671	8.79146	8.89578	12.4249		7.7101	6.62036	7.39699	10.8098	10.7984	6.63115	8.60267	7.76815	8.01475	5.35532
8.48279	7.04972	8.47216	8.63371	8.73875	7.99448	9.35247	8.60174	10.4612	12.2344		1.07627	1.08596	1.01051	1.13651	1.11009	1.02083	2.01538	1.01568	1.06443	1.06956		8.21108	8.48718	8.72997	7.87632	10.3486	7.30815	12.7491	8.83136	8.95994	12.5033		7.78503	6.89834	7.20954	10.7825	10.8551	6.64818	8.6121	7.75024	8.20269	5.30407
8.21653	7.00867	8.3728	8.64811	8.71449	7.93348	9.29007	8.57188	10.4718	12.0914		1.08078	1.08857	1.00954	1.13159	1.11546	1.0228	2.05974	1.01605	1.06269	1.07061		8.1211	8.43946	8.93585	7.89877	10.3032	7.44287	12.4598	8.80582	9.01909	12.4872		7.74724	6.53099	6.90821	10.7774	10.8388	6.60407	8.6367	7.6837	8.30669	5.28973
8.3281	6.98852	8.44226	8.62285	8.71063	7.90387	9.36772	8.60443	10.6435	12.3399		1.08269	1.08753	1.01355	1.13559	1.09658	1.0206	1.99829	1.01295	1.06249	1.07109		8.40205	8.3255	8.69931	7.90267	10.2675	7.45623	12.3573	8.82547	9.00042	12.1839		7.84124	6.89002	6.99704	10.7144	10.8416	6.64456	8.55109	7.73843	8.23714	5.40748
8.44362	7.01679	8.40603	8.60882	8.71161	7.85148	9.32915	8.57511	10.5546	12.2184		1.08462	1.08892	1.01084	1.1347	1.0894	1.02007	2.0811	1.01363	1.06171	1.0694		8.48883	8.25743	8.78876	7.88606	10.2036	7.39203	12.76	8.80389	8.9564	12.0855		7.81484	6.92634	6.86257	10.7284	10.8015	6.62264	8.54201	7.70026	8.29945	5.34044
8.35974	7.02598	8.42538	8.61334	8.69564	7.88488	9.33028	8.54683	10.436	11.9021		1.08853	1.09215	1.0127	1.13923	1.08633	1.01794	2.01423	1.01678	1.0601	1.07081		8.07971	8.35171	9.161	7.8971	10.2604	7.37282	12.2412	8.82278	8.97355	12.4215		7.73474	6.72554	7.25917	10.7756	10.791	6.62576	8.65074	7.65291	8.57564	5.44109
8.29362	6.98934	8.31439	8.59577	8.69766	7.95937	9.31717	8.61604	10.5686	12.1702		1.07364	1.09048	1.01254	1.13949	1.10095	1.02153	2.07406	1.01405	1.05954	1.07033		8.37922	8.43472	8.63511	7.91456	10.2797	7.35146	12.2509	8.80993	8.9556	12.6207		7.81223	6.82408	7.5666	10.7395	10.8455	6.64888	8.6111	7.59945	8.38343	5.39779
8.37073	7.01601	8.47841	8.60787	8.69144	7.81839	9.35953	8.58709	10.6389	12.0037		1.08119	1.09183	1.0129	1.13996	1.10497	1.0229	2.06407	1.01566	1.06017	1.07092		8.16242	8.5941	8.41664	7.91944	10.2601	7.38012	12.3367	8.85327	8.96367	12.2259		7.83042	6.70071	7.63741	10.7198	10.8582	6.60409	8.6407	7.57714	8.12738	5.29324
8.2656	7.03418	8.42794	8.59982	8.70317	7.88438	9.36516	8.56013	10.4477	12.127		1.07164	1.09014	1.01323	1.13842	1.10907	1.02006	2.01346	1.01632	1.05948	1.07047		8.57437	8.58498	8.55702	7.89743	10.2713	7.34524	11.711	8.70759	8.93927	12.3742		7.85233	6.75693	7.71916	10.6553	10.9169	6.62092	8.55035	7.51653	8.17807	5.34735
8.36782	7.021	8.48428	8.5879	8.69355	7.94575	9.32211	8.57615	10.5128	11.9627		1.06557	1.09103	1.01015	1.13662	1.10067	1.02448	2.02004	1.01272	1.05931	1.06929		8.34148	8.55124	8.84942	7.89478	10.2779	7.34044	11.7333	8.80087	8.97682	12.5574		7.95653	6.82269	7.7089	10.6201	10.8691	6.60328	8.57745	7.56587	8.3053	5.36823
8.29619	7.02332	8.42098	8.58126	8.6933	7.86223	9.3421	8.5426	10.5611	12.3878		1.07067	1.09348	1.01019	1.1385	1.10285	1.01946	2.06222	1.01595	1.05917	1.06789		8.22762	8.61085	8.79105	7.88608	10.1894	7.3443	12.2443	8.77122	8.98407	12.5214		7.83705	6.69062	7.67985	10.5605	10.891	6.57397	8.64134	7.53447	8.28816	5.43634
8.34193	7.04648	8.37877	8.57636	8.68961	7.87803	9.41789	8.54251	10.4319	12.1081		1.06624	1.08792	1.01404	1.13612	1.09338	1.01861	2.01509	1.01623	1.05987	1.07055		8.33015	8.52272	8.67089	7.87019	10.2201	7.34487	12.2254	8.82363	8.83932	12.4696		7.91728	6.31205	7.81985	10.5742	10.8735	6.59842	8.54561	7.46574	8.38596	5.32662
8.42734	7.0073	8.42193	8.57915	8.72052	7.87554	9.38676	8.56016	10.3954	12.0893		1.06305	1.08286	1.0111	1.14068	1.10096	1.01915	2.07172	1.01585	1.06063	1.06945		8.0786	8.58088	8.66869	7.87125	10.1418	7.35732	12.1426	8.81891	8.91049	12.5036		7.92064	6.33707	7.64861	10.6184	10.856	6.65404	8.61897	7.46248	8.41721	5.35869
8.26394	7.01298	8.39756	8.56987	8.68968	7.94581	9.41517	8.55098	10.5085	12.094		1.05971	1.08351	1.01076	1.13614	1.10049	1.01689	1.99719	1.01609	1.05922	1.0702		8.6931	8.58726	8.75416	7.86026	10.1113	7.33049	12.1663	8.79208	8.81449	12.7122		7.89202	6.80741	7.7648	10.6289	10.8972	6.61023	8.6113	7.52771	8.2861	5.28708
8.26829	7.04805	8.43858	8.57728	8.69692	7.94319	9.42716	8.50639	10.4477	12.0854		1.07075	1.08158	1.01312	1.13408	1.10721	1.01676	2.01387	1.01498	1.05853	1.06829		8.62534	8.6863	8.74396	7.86135	10.189	7.31083	12.2143	8.77309	8.83108	12.7481		7.93263	6.49866	7.77838	10.5766	10.9422	6.60415	8.5961	7.58367	8.25341	5.38742
8.40539	7.00769	8.35563	8.56444	8.66064	7.92119	9.38193	8.54701	10.374	12.0748		1.06271	1.08193	1.01308	1.13901	1.11406	1.01329	2.06637	1.01485	1.05871	1.07088		8.76529	8.50793	8.79998	7.85791	10.1549	7.33106	12.409	8.80618	8.90873	12.48		7.92399	6.67456	7.72817	10.5532	10.8762	6.62869	8.57413	7.62521	8.0408	5.36001
8.32348	7.00912	8.47282	8.55821	8.66878	7.86845	9.32056	8.52655	10.4731	12.0556		1.05689	1.08294	1.01014	1.13563	1.10187	1.01276	2.08288	1.01606	1.05884	1.07105		8.86995	8.41989	8.75009	7.84849	10.0868	7.32377	12.5513	8.82994	8.94169	12.6989		7.96273	6.52522	7.6206	10.5625	10.9967	6.61569	8.57109	7.62535	8.08215	5.36128
8.3161	7.01736	8.38116	8.55575	8.66097	7.8694	9.43587	8.48287	10.4288	12.196		1.05442	1.08411	1.01267	1.1326	1.11094	1.01506	2.03728	1.01557	1.06007	1.06987		9.12735	8.68604	8.83862	7.83999	10.1371	7.31772	12.5612	8.74211	8.8558	12.7094		7.98313	6.78825	7.72969	10.5642	10.8854	6.61153	8.59052	7.67122	8.19751	5.42308
8.16458	7.01584	8.36579	8.55361	8.65048	7.91625	9.44446	8.54693	10.385	12.059		1.06696	1.07946	1.00702	1.12614	1.10282	1.01397	2.02953	1.01756	1.05902	1.07105		9.49293	8.76076	8.87724	7.83889	10.0986	7.30994	12.3986	8.81856	8.87872	12.5068		7.93614	6.84206	7.69574	10.5689	10.9098	6.57156	8.52593	7.65355	8.08657	5.3374
8.36959	6.99298	8.38663	8.54721	8.64711	7.87259	9.37074	8.54096	10.4203	12.0258		1.07104	1.07707	1.01139	1.13241	1.12136	1.01902	2.08514	1.01425	1.06023	1.07054		9.0923	8.30443	8.53467	7.8402	10.1508	7.28619	12.7395	8.84346	8.91862	12.5377		7.94184	6.79629	7.77082	10.5601	10.879	6.64017	8.60635	7.64218	7.84635	5.35906
8.20364	7.04248	8.32965	8.5459	8.67005	7.87612	9.38269	8.47312	10.4209	12.1848		1.06647	1.07818	1.00794	1.13098	1.1083	1.01991	2.07848	1.01378	1.05963	1.06989		9.12105	8.34516	8.52012	7.82817	10.2163	7.3503	12.4295	8.87643	8.86562	12.6477		7.99532	6.66003	7.80638	10.5393	10.8526	6.61785	8.60957	7.70222	8.05122	5.37508
8.23008	7.00935	8.31653	8.53737	8.67224	7.86383	9.44101	8.49434	10.373	12.1467		1.05495	1.07803	1.01623	1.13086	1.09794	1.01743	2.04876	1.01547	1.05921	1.07047		9.06306	8.4775	8.94994	7.84787	10.2439	7.31009	12.4104	8.91473	8.8873	12.4364		8.02521	6.69255	7.77108	10.5287	10.9111	6.63477	8.55142	7.76879	7.94476	5.33307
8.19167	6.99427	8.35912	8.5379	8.63061	7.84855	9.40341	8.51637	10.3648	11.9834		1.05524	1.08281	1.01029	1.12838	1.09091	1.01961	2.0179	1.01884	1.0567	1.07058		8.98467	8.41369	8.87683	7.82345	10.279	7.37478	13.041	8.86518	8.92042	12.4176		7.93291	6.63566	7.76649	10.4968	10.8451	6.59952	8.56082	7.69869	7.90958	5.34003
8.1552	7.01225	8.35755	8.53536	8.66678	7.9494	9.4111	8.46453	10.4325	11.9766		1.06286	1.08108	1.00864	1.1275	1.10658	1.0198	2.0626	1.01814	1.05611	1.07001		8.78494	8.62141	8.82351	7.83648	10.3459	7.38876	12.6546	8.87836	8.8603	12.4914		8.03881	6.81193	7.7965	10.5223	10.8145	6.62723	8.55893	7.70563	7.9863	5.38059
8.27625	7.01976	8.34245	8.51882	8.66003	7.87051	9.39368	8.48513	10.3902	11.9632		1.06235	1.0843	1.0072	1.129	1.1058	1.02098	2.02085	1.01533	1.05744	1.07127		8.7888	8.51413	8.70002	7.84375	10.3508	7.45709	12.768	8.78191	8.75476	12.5712		8.09624	6.74584	7.73492	10.502	10.8806	6.62962	8.56989	7.64088	7.798	5.2809
8.18906	6.96509	8.2973	8.52481	8.64052	7.93251	9.43713	8.49684	10.4009	11.942		1.06041	1.08591	1.01191	1.13038	1.09612	1.01835	2.03891	1.01491	1.05629	1.07149		8.59912	8.4793	8.69493	7.8458	10.3871	7.30103	12.4836	8.82966	8.8863	12.411		7.96434	6.47832	7.75628	10.5085	10.7541	6.615	8.5629	7.69676	8.04188	5.30422
8.19309	6.99094	8.35664	8.52044	8.61606	7.87106	9.43657	8.43449	10.4414	11.936		1.06446	1.08286	1.00911	1.12399	1.11402	1.01879	2.00221	1.01719	1.05701	1.07059		8.82175	8.40776	8.74551	7.86801	10.2953	7.37092	12.5765	8.77798	8.87324	12.4131		8.01383	6.67335	7.72786	10.5297	10.8278	6.61204	8.59696	7.65748	8.06636	5.35235
8.36621	6.99825	8.30847	8.50926	8.64337	7.92522	9.4696	8.47355	10.4192	11.9469		1.0562	1.0848	1.00837	1.12403	1.10918	1.01979	2.00913	1.01431	1.05732	1.06922		8.73381	8.61013	8.74356	7.85646	10.2292	7.41717	12.407	8.76257	8.82624	12.6581		8.03394	6.61585	7.77017	10.5131	10.8163	6.59653	8.55504	7.69446	7.88614	5.39176
8.15348	6.98373	8.36836	8.50627	8.63347	7.92112	9.46393	8.4747	10.4044	12.0474		1.04568	1.08124	1.01145	1.12722	1.10651	1.02132	2.00145	1.01573	1.05777	1.07123		8.97324	8.50997	8.53226	7.84758	10.189	7.32291	12.6371	8.76643	8.84577	12.5293		8.04247	6.57678	7.65	10.522	10.7956	6.62908	8.56732	7.66405	7.93539	5.14344
8.15479	6.99155	8.3357	8.50747	8.63058	7.83855	9.4102	8.42312	10.4539	11.8452		1.04925	1.08567	1.01285	1.12431	1.12295	1.01779	2.05042	1.01655	1.0588	1.07172		8.532	8.50903	8.84599	7.84468	10.2226	7.31637	11.9523	8.75216	8.88225	12.4687		8.02243	6.57895	7.55873	10.5785	10.902	6.6451	8.53516	7.6154	8.1369	5.31361
8.33468	6.97188	8.35762	8.50911	8.62041	7.9342	9.37065	8.43963	10.4382	11.9918		1.05347	1.09348	1.01049	1.12798	1.11502	1.01728	2.01026	1.01339	1.05911	1.07111		8.74904	8.52635	8.69999	7.84349	10.3373	7.3269	11.8528	8.63558	8.85425	12.5349		8.10755	6.45096	7.71106	10.6114	10.8543	6.59228	8.50601	7.69456	7.98477	5.36341
8.2323	6.98428	8.39334	8.49837	8.61442	7.8313	9.3252	8.48642	10.4101	11.9764		1.05197	1.0878	1.01261	1.12474	1.08614	1.0177	2.01182	1.01665	1.0581	1.07181		8.47913	8.48107	8.50613	7.83516	10.2953	7.35771	11.7542	8.63275	8.9406	12.4458		8.07579	6.61328	7.6453	10.6281	10.9079	6.62725	8.60863	7.5656	8.00163	5.31973
8.14898	6.967	8.39387	8.49348	8.61148	7.76204	9.36657	8.40963	10.4324	12.0838		1.05361	1.09159	1.00664	1.12145	1.11201	1.01876	2.01446	1.0169	1.05752	1.07148		8.86273	8.34997	8.84259	7.85825	10.2599	7.34585	11.9292	8.63741	8.87578	12.4407		8.0922	6.70206	7.54081	10.6718	10.913	6.58903	8.55427	7.55633	8.2735	5.33534
8.08292	6.98443	8.38168	8.48807	8.58732	7.85818	9.37853	8.4265	10.487	11.8249		1.0564	1.08275	1.00886	1.12	1.09985	1.01925	2.04248	1.0166	1.05848	1.0707		8.50787	8.41279	8.45839	7.82497	10.2044	7.29544	11.817	8.54161	8.88599	12.6892		8.18415	6.71617	7.41219	10.6934	10.8894	6.58638	8.55406	7.59298	8.12609	5.27756
8.29135	6.94764	8.33649	8.48416	8.61747	7.88175	9.30372	8.47297	10.4543	11.767		1.05212	1.0911	1.01008	1.11715	1.10893	1.01909	2.06083	1.01482	1.05819	1.07114		8.44552	8.3041	8.5892	7.84935	10.2076	7.37653	12.301	8.55658	8.81366	12.5454		8.17385	6.66469	7.69321	10.6204	10.9535	6.57894	8.51424	7.50082	8.16163	5.18377
8.20014	6.95085	8.33934	8.47077	8.60418	7.83531	9.36266	8.42614	10.456	12.0733		1.05045	1.08981	1.00912	1.12472	1.12282	1.01828	2.04297	1.02006	1.05941	1.07261		8.16183	8.26196	8.57915	7.83261	10.1799	7.33569	12.5271	8.51279	8.8005	12.6018		8.17569	6.59086	7.72107	10.616	10.9174	6.57433	8.55605	7.40679	8.1577	5.38453
8.23582	6.96075	8.37735	8.46559	8.60116	7.77437	9.38574	8.4232	10.4522	11.929		1.0397	1.08641	1.01032	1.11774	1.11523	1.02054	1.97958	1.0171	1.05936	1.07171		8.38855	8.51911	8.57481	7.81759	10.2726	7.43059	12.5046	8.55795	8.82998	12.7425		8.1349	6.69689	7.84778	10.5654	10.9735	6.59607	8.46765	7.46988	8.10767	5.32691
8.19749	6.94547	8.38653	8.4703	8.60276	7.80403	9.37101	8.4471	10.4241	11.7479		1.05269	1.08788	1.00989	1.11531	1.10794	1.01853	2.02955	1.01707	1.05876	1.07087		8.45831	8.29697	8.63709	7.8312	10.0938	7.34045	12.481	8.55048	8.83641	12.7032		8.11796	6.43751	7.79206	10.5544	10.9138	6.58364	8.44795	7.42671	7.95079	5.15994
8.31381	6.92896	8.36787	8.46716	8.5905	7.86532	9.39352	8.41497	10.4383	11.7715		1.04469	1.08541	1.0084	1.12019	1.1172	1.01686	1.9836	1.01711	1.06063	1.07136		8.28167	8.36284	8.91382	7.79104	10.1254	7.35733	12.559	8.4956	8.7892	12.5734		8.13372	6.55057	7.79564	10.642	10.9616	6.61604	8.43724	7.40002	8.02884	5.36234
8.21367	6.94196	8.47421	8.46755	8.58443	7.78045	9.41784	8.4016	10.4291	12.0202		1.05075	1.09006	1.02011	1.11468	1.08515	1.02076	2.04293	1.01649	1.05896	1.07068		8.48192	8.49844	8.72966	7.80794	10.1779	7.39053	12.4516	8.49335	8.85879	12.6307		8.16317	6.46798	7.81777	10.5928	10.8428	6.54148	8.51863	7.41861	8.09058	5.27004
8.05565	6.95716	8.48313	8.45552	8.59252	7.74534	9.37853	8.42725	10.3951	11.8994		1.04918	1.08224	1.01226	1.11465	1.10295	1.02016	2.03446	1.01702	1.05837	1.06958		8.49776	8.42157	8.53753	7.81788	10.1216	7.32343	12.3236	8.50454	8.86113	12.7225		8.13428	6.68246	7.72625	10.5766	10.9342	6.59624	8.52681	7.45606	8.03458	5.24419
8.28746	6.9305	8.39731	8.45255	8.60586	7.8969	9.44503	8.39879	10.3567	11.7123		1.0432	1.08125	1.01424	1.11467	1.09658	1.01975	2.06468	1.01679	1.05889	1.06979		8.738	8.34955	8.77768	7.80314	10.1942	7.30262	12.674	8.46604	8.85367	12.6175		8.1167	6.86452	7.83817	10.5516	10.9351	6.58456	8.47747	7.46838	8.13785	5.32489
8.11159	6.95116	8.40379	8.44692	8.59354	7.82524	9.38373	8.39638	10.3705	11.8943		1.04672	1.08223	1.01035	1.11998	1.09539	1.01952	2.01493	1.01959	1.05819	1.06954		8.50587	8.34308	8.79559	7.79069	10.0404	7.28361	12.2891	8.48753	8.73403	12.6176		8.1883	6.40442	7.86996	10.5753	10.8098	6.59893	8.58282	7.49734	8.20925	5.3785
8.17558	6.91803	8.35194	8.44116	8.60003	7.88958	9.38658	8.42135	10.3608	11.8801		1.04586	1.08064	1.00605	1.11591	1.09295	1.01707	2.00293	1.0171	1.05782	1.07014		8.49518	8.4688	9.00481	7.76881	10.0918	7.34462	12.6523	8.48225	8.77488	12.6411		8.20117	6.56557	7.84859	10.5591	10.8062	6.57334	8.53027	7.45851	8.14418	5.28912
8.07932	6.92316	8.46146	8.4357	8.5748	7.81952	9.4063	8.3962	10.3324	11.6877		1.04702	1.08003	1.00805	1.11549	1.11234	1.0191	2.09124	1.01966	1.05887	1.06943		8.65393	8.26757	8.59979	7.8054	10.1755	7.36111	12.4819	8.47194	8.83482	12.5945		8.1277	6.47045	7.82239	10.5302	10.7798	6.61191	8.59178	7.48601	8.20293	5.32588
8.24669	6.93835	8.44533	8.42809	8.59488	7.81055	9.37376	8.39554	10.3608	11.703		1.04884	1.08745	1.01093	1.11559	1.10916	1.01915	2.05448	1.01912	1.05702	1.07182		8.571	8.50143	8.7503	7.79819	10.1979	7.21956	12.6765	8.50096	8.8133	12.5123		8.21812	6.59819	7.78766	10.5005	10.7399	6.56453	8.49672	7.54959	8.31043	5.33935
8.08422	6.93313	8.42854	8.42778	8.59	7.85033	9.38926	8.4283	10.4046	11.8083		1.0441	1.07801	1.01102	1.11101	1.09487	1.0191	2.06476	1.01626	1.05615	1.07005		8.25391	8.45897	8.60619	7.79309	10.222	7.30555	12.8721	8.53376	8.72884	12.5331		8.17094	6.42194	7.77917	10.5256	10.875	6.56992	8.52747	7.54874	8.21657	5.30649
8.1637	6.91052	8.42923	8.42176	8.59351	7.83053	9.42504	8.36824	10.3819	11.828		1.04586	1.08356	1.01106	1.11314	1.092	1.02031	2.02964	1.0196	1.05595	1.07122		8.53204	8.51668	8.55958	7.77319	10.2219	7.3469	12.4409	8.53007	8.73524	12.5279		8.17698	6.24735	7.77935	10.4631	10.7982	6.51628	8.55005	7.58162	8.30634	5.34863
8.18367	6.93093	8.35168	8.41121	8.55959	7.90241	9.3759	8.38761	10.352	12.0723		1.04428	1.0844	1.00826	1.10877	1.09036	1.0213	2.06233	1.01913	1.05485	1.06858		8.78673	8.4163	8.89943	7.77518	10.1863	7.36012	12.6497	8.61247	8.72234	12.5243		8.22624	6.66927	7.69982	10.4741	10.7888	6.5683	8.58178	7.52857	8.25366	5.25173
8.17785	6.92245	8.36798	8.40428	8.55638	7.82265	9.43518	8.40215	10.3566	11.6765		1.04395	1.08374	1.01512	1.11258	1.08646	1.02111	2.03749	1.0185	1.05424	1.06825		8.55629	8.19514	8.81545	7.78133	10.1867	7.24059	12.5996	8.58621	8.80288	12.4694		8.15543	6.63988	7.83561	10.4708	10.8195	6.47919	8.48681	7.5462	8.29622	5.22358
8.24928	6.91447	8.40989	8.39644	8.55022	7.84455	9.40628	8.37795	10.3419	11.8113		1.04423	1.07775	1.01009	1.11445	1.09968	1.0191	2.03436	1.01798	1.05367	1.06991		8.66032	8.39921	8.54534	7.78411	10.1991	7.33816	12.6334	8.62879	8.76674	12.5742		8.23247	6.56782	7.87688	10.4812	10.8027	6.58429	8.43557	7.58608	8.21507	5.25754
8.26337	6.91776	8.40053	8.37616	8.56469	7.77777	9.39277	8.37921	10.3426	11.7584		1.04318	1.08179	1.01122	1.11518	1.12874	1.01849	2.05321	1.01846	1.05562	1.07014		8.49435	8.45463	8.48754	7.79907	10.1905	7.3233	12.0593	8.52527	8.73194	12.5139		8.22124	6.54149	8.01012	10.4595	10.8559	6.58536	8.41664	7.51581	8.49121	5.29676
8.11587	6.91528	8.42256	8.37231	8.5455	7.88465	9.38298	8.38357	10.37	11.628		1.03346	1.081	1.0077	1.10819	1.11209	1.01656	2.05465	1.01938	1.05636	1.07046		8.70592	8.30178	8.56329	7.75153	10.183	7.33638	11.8251	8.57751	8.75528	12.5403		8.24803	6.56424	7.86128	10.4904	10.7864	6.53548	8.47775	7.58187	8.38599	5.23308
8.3109	6.90534	8.40152	8.36534	8.57629	7.74251	9.34919	8.35816	10.3908	11.9592		1.0322	1.08262	1.0125	1.10653	1.07977	1.01712	1.96636	1.02018	1.05524	1.07236		8.52567	8.26053	8.81004	7.7907	10.1286	7.29599	11.7796	8.57436	8.79266	12.5986		8.23988	6.44798	8.05336	10.4257	10.7764	6.56655	8.49655	7.52746	8.28231	5.13605
8.15906	6.91874	8.34396	8.35289	8.56534	7.83247	9.37798	8.32844	10.3252	11.7423		1.02481	1.07832	1.01286	1.11048	1.08345	1.01834	2.01088	1.02251	1.05685	1.0714		8.56837	8.33306	8.55368	7.75597	10.1821	7.36545	11.8547	8.5612	8.84249	12.5164		8.22247	6.63962	7.92192	10.4349	10.7737	6.50605	8.46443	7.53935	8.31669	5.2969
8.22137	6.91814	8.28074	8.33964	8.54279	7.74314	9.30987	8.38865	10.3803	11.8864		1.02934	1.07471	1.01099	1.11315	1.07021	1.01611	2.07722	1.01986	1.05645	1.07133		8.53686	8.27374	8.94803	7.74468	10.0822	7.33915	12.1216	8.46847	8.79638	12.5313		8.19347	6.37668	7.7307	10.4426	10.8709	6.51206	8.51505	7.49238	8.20733	5.23349
8.19862	6.90414	8.34266	8.353	8.55785	7.64409	9.3418	8.31792	10.3757	11.5873		1.03334	1.077	1.01081	1.10922	1.07651	1.01293	2.08875	1.01965	1.0563	1.07194		8.35263	8.1993	8.38495	7.76968	10.1028	7.31482	11.6932	8.51591	8.78051	12.5223		8.26497	6.4211	7.67607	10.4324	10.8079	6.54689	8.43927	7.4212	8.29419	5.30556
8.25018	6.91453	8.30827	8.34459	8.58033	7.74728	9.29038	8.33949	10.3484	11.8854		1.04035	1.08555	1.01049	1.10743	1.09721	1.01961	2.03212	1.01906	1.05464	1.07348		8.42097	8.19894	8.78141	7.75051	10.0716	7.36246	12.2643	8.50073	8.68079	12.5323		8.3245	6.3671	7.43328	10.4288	10.9244	6.50211	8.49112	7.42924	8.26568	5.20687
8.10959	6.90423	8.29993	8.33523	8.56721	7.73161	9.29317	8.36717	10.3707	11.736		1.02221	1.08327	1.00974	1.10698	1.07012	1.01591	1.99237	1.02264	1.05467	1.07145		8.43666	8.30678	8.68124	7.78804	10.0481	7.3374	12.214	8.53819	8.75927	12.5679		8.25139	6.32548	7.46452	10.4469	10.9426	6.52136	8.48114	7.42039	8.05512	5.26203
8.25249	6.91345	8.38124	8.3359	8.56047	7.78406	9.26715	8.3424	10.3565	11.5554		1.03128	1.08572	1.01058	1.10463	1.09273	1.01666	2.04651	1.01705	1.0561	1.07096		8.6291	8.27249	8.80949	7.75111	10.0128	7.28984	12.3651	8.55792	8.71075	12.6341		8.17789	6.43959	7.26589	10.3793	10.9172	6.50839	8.47458	7.35599	7.9865	5.23482
8.14389	6.89503	8.3612	8.31997	8.56823	7.72376	9.35861	8.31762	10.3431	11.6917		1.03018	1.08396	1.01233	1.10596	1.08571	1.01859	2.05403	1.02262	1.05454	1.07264		8.44795	8.09096	8.41679	7.74909	10.0187	7.33707	12.4905	8.52436	8.78706	12.7973		8.28435	6.49281	7.38565	10.3847	10.9222	6.49524	8.56263	7.40868	8.44117	5.25353
8.12495	6.90618	8.263	8.31754	8.54364	7.809	9.39287	8.3319	10.3327	11.9803		1.03789	1.07511	1.00991	1.1059	1.0793	1.02003	2.13166	1.0193	1.05414	1.07327		8.69193	8.23605	8.80819	7.73853	9.9894	7.34157	12.3784	8.54138	8.67126	12.7826		8.28508	6.50527	7.50324	10.3773	10.8966	6.5492	8.54099	7.36104	8.38326	5.21946
8.0611	6.90269	8.30017	8.30612	8.52882	7.84607	9.38351	8.32907	10.3468	11.9823		1.03482	1.07534	1.00839	1.10146	1.09663	1.01944	2.07414	1.01964	1.05315	1.07113		8.44789	8.41132	8.79208	7.74254	9.98921	7.33786	12.5438	8.51671	8.79717	12.6035		8.26953	6.44748	7.82674	10.3714	10.9075	6.51553	8.47303	7.34994	8.00495	5.20444
8.18047	6.90038	8.33107	8.30344	8.55301	7.74881	9.40639	8.32131	10.3195	11.838		1.03332	1.08192	1.00484	1.10387	1.0801	1.02307	2.03697	1.01847	1.05384	1.07334		8.50071	8.20454	8.91113	7.74231	9.95627	7.34289	12.4712	8.5694	8.81208	12.1619		8.22436	6.49455	7.77332	10.3728	10.7835	6.54804	8.46629	7.37997	8.1436	5.31402
8.19665	6.90559	8.22774	8.29047	8.54954	7.84094	9.41963	8.33889	10.3119	11.8054		1.02188	1.08442	1.00971	1.10382	1.12441	1.02234	2.08968	1.01811	1.05482	1.07031		8.75215	8.17104	9.38155	7.74741	9.98481	7.3512	12.4253	8.47744	8.76555	12.5427		8.28668	6.40866	7.83735	10.3489	10.7897	6.51779	8.478	7.36458	8.2986	5.30043
8.09831	6.90424	8.34183	8.29278	8.55726	7.67302	9.43483	8.31776	10.3112	11.9753		1.02894	1.07657	1.00746	1.10748	1.07179	1.02476	2.06962	1.0199	1.05513	1.07103		8.46646	8.49955	8.66328	7.72698	9.9994	7.31309	12.5739	8.49046	8.69903	13.0381		8.23213	6.38559	7.7611	10.2992	10.6981	6.51572	8.52785	7.36856	8.18578	5.18054
8.23152	6.88914	8.26473	8.28482	8.49915	7.66685	9.44658	8.30572	10.2642	11.6259		1.02584	1.07746	1.01212	1.10221	1.10498	1.02196	1.98061	1.01965	1.05564	1.06983		8.36655	8.24558	8.64924	7.74109	10.05	7.37667	12.4463	8.50697	8.76286	12.3147		8.30059	6.28188	7.82087	10.3226	10.7626	6.50037	8.49277	7.34494	8.39789	5.26888
8.17657	6.88256	8.2579	8.27944	8.53966	7.79544	9.41423	8.32766	10.3072	11.9167		1.0277	1.08486	1.00989	1.0968	1.09057	1.02364	2.04407	1.02096	1.05361	1.07043		8.40081	8.11964	8.75193	7.72119	10.0487	7.29547	12.4068	8.48602	8.74864	12.2467		8.29665	6.49546	7.7605	10.3183	10.7941	6.53757	8.5484	7.40931	8.40621	5.29746
8.18225	6.87343	8.28732	8.29013	8.55165	7.75197	9.42639	8.3071	10.2996	11.6058		1.03663	1.07922	1.0059	1.10397	1.08086	1.02271	2.00385	1.01909	1.05266	1.07273		8.55544	8.36001	8.70687	7.72184	10.0188	7.33331	12.8152	8.54824	8.68851	12.689		8.31419	6.22046	7.82911	10.3457	10.6906	6.47978	8.51466	7.38918	8.14944	5.25868
8.10076	6.88713	8.28961	8.28361	8.4995	7.80223	9.40985	8.31089	10.2665	11.7444		1.02303	1.07329	1.01555	1.10178	1.07085	1.01564	2.04408	1.02027	1.05204	1.07183		8.17806	8.25581	8.58662	7.73898	10.0258	7.27196	12.314	8.62524	8.74022	12.4687		8.30142	6.32798	7.81388	10.3753	10.8986	6.48139	8.50863	7.40896	8.26457	5.25029
8.09633	6.85531	8.25845	8.28841	8.52112	7.78219	9.43834	8.32349	10.2915	11.7307		1.02389	1.06954	1.00989	1.09814	1.09161	1.01612	1.99635	1.02178	1.05464	1.07229		8.54517	8.14173	8.68453	7.73304	10.0837	7.34806	12.4119	8.50738	8.70392	12.0885		8.37808	6.22809	7.97737	10.397	10.7598	6.52548	8.54991	7.39767	8.58283	5.1854
8.12074	6.85899	8.32116	8.26818	8.51028	7.72252	9.39593	8.2989	10.3064	11.7631		1.02454	1.07603	1.01066	1.10455	1.07301	1.01721	2.03266	1.01886	1.05391	1.07046		8.60942	8.2929	8.77013	7.75178	10.104	7.2565	12.5115	8.59649	8.82616	12.2287		8.26097	6.55864	7.87004	10.4312	10.8227	6.55109	8.4645	7.31444	8.2098	5.26083
8.2771	6.86401	8.30561	8.27278	8.50275	7.70151	9.3904	8.26982	10.2903	11.9903		1.02227	1.07764	1.00409	1.09857	1.10176	1.01561	2.05629	1.02151	1.05311	1.07264		8.96368	8.30812	8.4268	7.72521	10.1037	7.32193	11.8557	8.62711	8.70569	12.4635		8.31364	6.63109	7.89389	10.5141	10.8458	6.47792	8.58487	7.33643	8.25118	5.24233
8.02291	6.85695	8.26793	8.24455	8.5228	7.68054	9.4321	8.30895	10.3134	11.6845		1.02499	1.07912	1.00788	1.10055	1.08181	1.01756	2.01342	1.02194	1.05193	1.07104		8.9957	8.24131	8.64841	7.70643	10.1077	7.3251	12.0005	8.63115	8.66778	12.324		8.35146	6.56107	7.74868	10.4761	10.8183	6.48491	8.52224	7.32621	8.5327	5.24528
8.13656	6.84412	8.28686	8.28446	8.49731	7.68164	9.35996	8.26017	10.3103	11.7153		1.02403	1.07723	1.00706	1.09668	1.08408	1.01633	2.0794	1.01974	1.05085	1.07123		8.98301	8.28976	8.56666	7.72277	10.0751	7.25559	12.0869	8.64406	8.74443	12.1164		8.34281	6.43865	7.82525	10.5144	10.8107	6.48693	8.57302	7.38232	8.44578	5.17361
8.18336	6.85535	8.31825	8.28401	8.52235	7.70745	9.38713	8.23482	10.3255	11.6699		1.02676	1.06959	1.01511	1.09652	1.09295	1.01854	2.00554	1.0191	1.05282	1.07214		9.28971	8.37343	8.64007	7.71737	10.045	7.38572	12.0206	8.64037	8.77064	12.317		8.35558	6.61326	7.68605	10.4834	10.8903	6.48981	8.47293	7.36504	8.48344	5.22893
8.00739	6.86482	8.32447	8.26968	8.48775	7.65896	9.38513	8.28031	10.3143	11.5345		1.02596	1.06338	1.00473	1.09998	1.07618	1.01562	2.04891	1.02208	1.05217	1.07073		9.08161	8.35324	8.67333	7.7043	10.0535	7.34743	11.8745	8.71721	8.76919	12.5226		8.31257	6.33225	7.75188	10.5153	10.7953	6.49562	8.44484	7.38122	8.53787	5.16497
8.15218	6.84517	8.31447	8.27455	8.51896	7.76305	9.41759	8.25791	10.3215	11.6731		1.02815	1.06221	1.00977	1.10363	1.08115	1.02164	2.03276	1.01946	1.05239	1.07081		8.70524	8.18494	8.66644	7.70912	9.94739	7.29647	12.3406	8.68572	8.66827	12.2084		8.3188	6.42437	7.76045	10.4691	10.8961	6.47684	8.43305	7.29266	8.68909	5.14036
8.12931	6.85922	8.34054	8.27105	8.51854	7.6482	9.39987	8.25863	10.3398	11.6277		1.02989	1.06369	1.00772	1.09927	1.09064	1.02246	2.03214	1.02033	1.05199	1.07299		8.86867	8.19338	8.46506	7.71638	9.92218	7.3324	12.129	8.63389	8.67201	12.2154		8.34345	6.21718	7.52205	10.5373	10.8651	6.45304	8.44336	7.30511	8.58943	5.2692
8.14755	6.87678	8.18031	8.26235	8.50306	7.66288	9.36611	8.2539	10.3288	11.7717		1.01692	1.06371	1.00789	1.10601	1.06736	1.02007	2.00706	1.02045	1.05347	1.0721		8.47491	8.27287	8.5309	7.70877	9.927	7.28273	12.2519	8.69835	8.7496	12.392		8.34568	6.28208	7.37457	10.5501	10.96	6.44679	8.51831	7.28323	8.69286	5.26626
8.06195	6.832	8.31894	8.28346	8.49455	7.81862	9.35758	8.27344	10.3437	11.6566		1.02631	1.07146	1.00748	1.10854	1.0974	1.02343	2.0585	1.02459	1.05285	1.07027		8.55761	8.20643	8.6021	7.71182	9.88322	7.25682	12.0893	8.68015	8.62054	12.2297		8.34833	6.21227	7.3318	10.5261	10.9101	6.47031	8.42889	7.21159	8.34977	5.26133
8.26703	6.85716	8.31767	8.24546	8.50981	7.70841	9.29693	8.22581	10.3199	11.5975		1.02987	1.06546	1.00825	1.1083	1.09401	1.0239	2.0124	1.0235	1.05249	1.07168		8.91879	8.18074	8.74319	7.72405	9.95751	7.25787	12.4777	8.5572	8.73442	12.2147		8.3949	6.33879	7.29121	10.4513	10.9018	6.46939	8.47568	7.307	8.79057	5.12815
8.15019	6.86652	8.31461	8.24761	8.49472	7.80987	9.311	8.26511	10.3047	11.4459		1.02258	1.06566	1.01053	1.10973	1.10676	1.02201	2.03717	1.02372	1.05303	1.07274		8.25576	8.24152	8.66375	7.73513	9.90198	7.24519	12.642	8.6884	8.61344	12.401		8.38027	6.38867	7.55656	10.4553	10.914	6.52442	8.53428	7.27152	8.38123	5.10592
8.22151	6.85853	8.33618	8.26672	8.49576	7.68325	9.35703	8.24255	10.309	11.6072		1.02523	1.06386	1.01428	1.10818	1.07826	1.02123	1.96815	1.01983	1.05276	1.07204		8.5998	8.26887	8.86317	7.71686	9.92028	7.30652	12.2611	8.58338	8.60745	12.4386		8.34793	6.47805	7.72943	10.4494	10.765	6.51162	8.49484	7.35314	8.48614	5.17346
8.10559	6.84448	8.32472	8.2606	8.47623	7.75704	9.38447	8.23743	10.2645	11.7596		1.02978	1.06953	1.0087	1.10819	1.07303	1.02153	2.01348	1.02317	1.05247	1.07084		9.09673	8.24418	8.44239	7.70875	9.91629	7.22943	12.4518	8.54713	8.57555	12.3107		8.39194	6.5388	7.75538	10.4199	10.7678	6.43444	8.48689	7.31456	8.44526	5.25364
8.22272	6.85499	8.25325	8.26466	8.49317	7.80548	9.38647	8.2313	10.2816	11.4441		1.02901	1.07179	1.00963	1.10991	1.07812	1.02134	2.0077	1.02331	1.0529	1.07299		8.64101	8.15047	8.70162	7.69854	9.89483	7.34151	12.2361	8.61148	8.57502	12.3652		8.34538	6.40269	7.74867	10.4365	10.7905	6.48098	8.42368	7.31205	8.45286	5.14745
8.04908	6.8553	8.23757	8.26464	8.48337	7.72515	9.40063	8.22814	10.247	11.7466		1.02137	1.0677	1.00689	1.11646	1.07461	1.02035	2.05764	1.02291	1.05252	1.07066		8.1754	8.09734	8.82608	7.71676	9.8867	7.25149	12.2343	8.5966	8.67854	12.5258		8.2689	6.2767	7.80147	10.3693	10.7726	6.48171	8.38759	7.31624	8.38829	5.27527
8.16615	6.83609	8.30149	8.27286	8.46249	7.66359	9.43953	8.20547	10.2194	11.5657		1.02134	1.06223	1.00801	1.11025	1.08959	1.01866	2.04634	1.02264	1.05512	1.07116		8.1638	8.13039	9.32085	7.7133	9.85157	7.29846	12.2707	8.68107	8.67811	12.3759		8.3345	6.07611	7.71993	10.3887	10.6842	6.49221	8.43821	7.34034	8.31579	5.15193
8.12442	6.8453	8.26232	8.22654	8.4701	7.73187	9.43129	8.24065	10.2255	11.5638		1.029	1.06367	1.008	1.11176	1.09165	1.02115	2.07512	1.0224	1.05298	1.07057		8.44207	8.32561	8.35144	7.70219	9.95032	7.26475	12.0676	8.63896	8.59118	12.3504		8.28803	6.08683	7.8475	10.3871	10.6947	6.50284	8.38316	7.39262	8.32755	5.25007
8.20426	6.81665	8.3353	8.26985	8.45735	7.63816	9.34547	8.21686	10.242	11.7315		1.02641	1.06376	1.00917	1.1106	1.0866	1.01946	2.03821	1.02364	1.05247	1.07319		8.61534	8.24446	8.89686	7.69785	9.93099	7.25627	12.2059	8.67718	8.62234	12.3895		8.3815	6.27836	7.85667	10.3445	10.7166	6.46305	8.46815	7.30326	8.51724	5.28347
7.99295	6.81811	8.32169	8.29106	8.46706	7.7359	9.38521	8.19836	10.2214	11.7219		1.01615	1.06457	1.01369	1.11032	1.08868	1.01803	2.08943	1.02329	1.05451	1.07144		8.56894	8.24303	8.36688	7.71429	9.88771	7.29022	11.7357	8.5824	8.69005	12.3719		8.44607	6.56771	7.9181	10.3326	10.7971	6.48203	8.41981	7.36402	8.22904	5.20686
8.1651	6.82641	8.30932	8.25161	8.47857	7.73495	9.40703	8.23145	10.251	11.8301		1.01618	1.06231	1.01136	1.11508	1.09582	1.023	2.10252	1.02395	1.05243	1.07272		8.51672	8.22197	8.66841	7.70044	9.90529	7.28456	11.695	8.68437	8.64371	12.3157		8.38539	6.40828	7.90889	10.3403	10.8304	6.49596	8.43118	7.27967	8.41024	5.16832
8.03052	6.81072	8.2935	8.26905	8.45746	7.61507	9.34549	8.23553	10.2561	11.5513		1.01732	1.06942	1.00729	1.11116	1.08513	1.02148	2.04921	1.02296	1.05343	1.07271		8.40875	8.29437	8.51275	7.72389	9.91	7.23656	11.7337	8.69386	8.55939	12.5001		8.40808	6.27901	7.77669	10.3154	10.8621	6.43713	8.33173	7.31756	8.27299	5.22167
8.10688	6.83147	8.22871	8.29397	8.45887	7.7065	9.3225	8.21673	10.2487	11.5517		1.03345	1.06582	1.00991	1.11172	1.0883	1.01973	2.07678	1.02323	1.0537	1.07358		8.69874	8.05786	8.46193	7.70799	9.89533	7.29658	11.3933	8.58579	8.60666	12.1898		8.38973	6.04584	7.99814	10.3357	10.7719	6.43857	8.43664	7.25141	8.29489	5.22121
8.21282	6.81094	8.337	8.27796	8.46612	7.76504	9.33135	8.22575	10.2371	11.6732		1.02047	1.06122	1.00346	1.10735	1.11296	1.02004	1.96996	1.02343	1.05353	1.07288		8.62508	8.25272	8.38574	7.71417	9.94841	7.25034	11.9363	8.63584	8.65528	11.9937		8.42719	6.31606	7.76013	10.338	10.9159	6.48789	8.44475	7.24418	8.42824	5.17807
8.06387	6.82072	8.40854	8.2419	8.46835	7.75353	9.33066	8.22282	10.2227	11.6917		1.02725	1.06333	1.00823	1.10356	1.10667	1.01788	2.02772	1.02398	1.05451	1.07401		8.41651	8.22231	8.41778	7.70838	9.91452	7.29006	11.7096	8.63333	8.57475	12.2422		8.32849	6.33147	7.77722	10.3374	10.8857	6.42817	8.46176	7.21795	8.35042	5.09072
8.17938	6.80864	8.27701	8.25064	8.45411	7.62079	9.39513	8.18345	10.2288	11.4936		1.02128	1.05855	1.00828	1.10789	1.10495	1.01688	2.04484	1.02427	1.05485	1.07291		8.68235	8.05019	8.80398	7.69349	9.85807	7.36522	11.9697	8.67957	8.57495	12.3568		8.35066	6.27234	7.90069	10.3982	10.9736	6.43336	8.38052	7.16437	8.28615	5.18143
8.16809	6.8102	8.40368	8.24653	8.47349	7.67475	9.32776	8.20182	10.2209	11.8077		1.02962	1.06491	1.00705	1.10626	1.08882	1.01487	2.01871	1.02337	1.05348	1.07445		8.54715	8.08036	8.39874	7.69306	9.87633	7.23175	11.9097	8.67743	8.63846	12.2202		8.4391	6.23717	7.89276	10.4022	10.814	6.42868	8.4443	7.18764	8.45006	5.126
8.11157	6.79206	8.25099	8.24417	8.45936	7.6736	9.31633	8.19838	10.2266	11.6503		1.01992	1.06541	1.00568	1.1073	1.09869	1.01458	2.00138	1.02187	1.05354	1.07373		8.71664	8.24458	8.71109	7.68899	9.84051	7.34394	11.8487	8.70818	8.60255	12.1845		8.35868	6.39355	7.90272	10.4009	10.7578	6.45635	8.43494	7.15582	8.58546	5.11739
7.91421	6.79749	8.31495	8.24076	8.46448	7.62103	9.31629	8.19458	10.2233	11.3537		1.02563	1.06553	1.00748	1.10785	1.09361	1.01599	2.014	1.02334	1.05224	1.07211		8.39711	8.08363	8.64466	7.69179	9.85718	7.25886	12.0055	8.64874	8.6785	12.2095		8.44728	6.16638	8.0121	10.4208	10.893	6.49399	8.37508	7.16167	8.39174	5.1034
8.08695	6.77927	8.1853	8.2675	8.45171	7.66995	9.32228	8.19776	10.2109	11.3321		1.02936	1.06805	1.00836	1.10287	1.09429	1.01623	1.95441	1.02526	1.05264	1.07227		8.20853	8.11348	8.32521	7.68339	9.87381	7.29403	12.2134	8.56213	8.62794	12.2939		8.4403	6.3118	7.83565	10.4723	10.8044	6.47705	8.40656	7.10339	8.3225	5.12605
8.10761	6.80728	8.35029	8.22807	8.44319	7.7197	9.33238	8.21994	10.2193	11.4641		1.0213	1.06367	1.01077	1.10091	1.05424	1.01871	1.99713	1.02244	1.05211	1.07341		8.35408	8.23504	8.22993	7.69731	9.84084	7.31466	12.075	8.65019	8.64237	12.3278		8.38654	6.20683	7.87852	10.5133	10.8509	6.40141	8.37343	7.08229	8.41367	5.1457
8.10097	6.79218	8.29055	8.2368	8.4376	7.57089	9.30325	8.16902	10.2081	11.3116		1.01823	1.0589	1.00426	1.10992	1.11556	1.01816	2.08659	1.02213	1.05137	1.07457		8.41982	8.1168	8.87784	7.69476	9.7935	7.29507	12.3567	8.56623	8.73027	12.4474		8.38207	6.42194	7.80755	10.5344	10.7435	6.45977	8.38106	7.11773	8.40787	5.12043
8.25468	6.78366	8.31241	8.21222	8.44556	7.71755	9.30665	8.20453	10.2023	11.3982		1.02778	1.06782	1.00595	1.10218	1.12358	1.02256	2.04635	1.02275	1.05201	1.07244		8.61439	7.98313	8.50652	7.69397	9.77598	7.18052	12.2606	8.56719	8.5923	12.335		8.43223	6.26635	7.62347	10.6192	10.7852	6.4498	8.39528	7.17628	8.38928	5.15594
8.10106	6.81284	8.30354	8.22326	8.43914	7.7214	9.27697	8.17292	10.2186	11.4213		1.02842	1.0666	1.00737	1.10171	1.09501	1.01758	1.98375	1.02562	1.0506	1.07312		8.43806	8.22197	8.73288	7.67994	9.81636	7.26492	12.0772	8.61207	8.62748	12.1276		8.3592	6.30037	7.6387	10.5709	10.7609	6.37287	8.40488	7.17463	8.46462	5.136
8.15425	6.80441	8.29154	8.21558	8.4324	7.71499	9.29506	8.17368	10.2052	11.5644		1.01657	1.06054	1.00664	1.09677	1.09773	1.01973	2.02674	1.02303	1.05173	1.07311		8.63655	8.13875	8.53488	7.68573	9.8142	7.34366	12.0944	8.64912	8.62009	12.2259		8.43814	6.02986	7.66271	10.5868	10.8097	6.43179	8.40892	7.17586	8.23698	5.2354
8.00208	6.7868	8.31412	8.23552	8.43549	7.70064	9.3645	8.17607	10.1959	11.6844		1.01687	1.06492	1.00662	1.09814	1.05563	1.01402	2.05711	1.02463	1.05148	1.07152		8.808	8.0022	8.58328	7.68451	9.81122	7.29363	12.1465	8.57366	8.65111	12.3879		8.51131	6.3978	7.78081	10.5486	10.7805	6.42627	8.33572	7.14551	8.41061	5.23168
7.97469	6.81911	8.18158	8.26573	8.4355	7.64747	9.3759	8.17889	10.2126	11.7307		1.0142	1.0631	1.00573	1.10144	1.0671	1.01516	2.03671	1.02601	1.05207	1.07264		8.82075	8.28353	8.70619	7.68196	9.78376	7.34757	12.022	8.5752	8.56152	12.4877		8.36233	6.38173	7.82028	10.56	10.7651	6.40927	8.31819	7.17389	8.59132	5.08689
8.08096	6.8019	8.30289	8.2362	8.4286	7.72205	9.39536	8.14706	10.1624	11.5235		1.01675	1.05722	1.00825	1.09636	1.08644	1.01518	2.05342	1.02338	1.05197	1.07358		8.44271	8.19438	8.62288	7.66992	9.80438	7.35689	11.8435	8.64766	8.71453	12.3606		8.41383	6.10843	7.91992	10.5578	10.8292	6.44527	8.42564	7.23362	8.32245	5.13985
8.21863	6.78477	8.25327	8.24791	8.42705	7.60729	9.40676	8.16371	10.1547	11.3917		1.01917	1.05439	1.0093	1.0916	1.0793	1.01415	2.0139	1.02304	1.05265	1.07365		8.82506	8.02951	8.55865	7.65461	9.79776	7.34016	11.7386	8.54857	8.63451	12.2953		8.42948	6.45424	7.79168	10.6119	10.8279	6.42197	8.39188	7.2451	8.19751	5.10123
7.96072	6.79183	8.23769	8.25946	8.41695	7.72855	9.37688	8.18072	10.1782	11.686		1.01233	1.06071	1.007	1.0927	1.10879	1.01741	2.03608	1.02315	1.05318	1.07221		8.65018	8.03666	9.03208	7.668	9.76971	7.25572	11.9249	8.5995	8.61077	12.3042		8.37798	5.9892	7.85399	10.5896	10.7934	6.42963	8.42147	7.22079	8.34152	5.24814
7.90862	6.77502	8.27196	8.26216	8.42515	7.62743	9.44451	8.13963	10.1629	11.5579		1.02854	1.05948	1.00956	1.08968	1.07816	1.01587	2.00457	1.02337	1.05408	1.0722		8.63247	8.01722	8.46458	7.69192	9.85402	7.30028	11.8787	8.65201	8.55365	12.1814		8.38531	6.25133	7.96196	10.5415	10.7988	6.38688	8.42982	7.2853	8.23808	5.18619
8.08623	6.77373	8.23356	8.23667	8.4366	7.67002	9.44059	8.15587	10.1695	11.3829		1.01906	1.06361	1.0038	1.09368	1.09906	1.01552	1.99867	1.02517	1.05231	1.07194		9.04658	8.18816	8.63366	7.65928	9.84	7.32564	11.6208	8.57081	8.57881	12.1947		8.46892	6.18605	7.89358	10.5454	10.8984	6.43779	8.43118	7.25876	8.34779	5.10919
7.97515	6.80285	8.19784	8.23647	8.41855	7.73448	9.42356	8.18059	10.1773	11.5218		1.01455	1.06219	1.00707	1.09774	1.07694	1.01569	1.98666	1.02469	1.05359	1.07252		8.5025	8.12823	8.687	7.66399	9.78129	7.3132	11.6174	8.589	8.64729	12.6082		8.39999	6.32632	7.79352	10.5197	10.8817	6.42335	8.46546	7.27287	8.28486	5.14795
8.23274	6.78012	8.12554	8.25202	8.41356	7.70282	9.42642	8.1221	10.1675	11.3658		1.01203	1.05614	1.0043	1.09242	1.09506	1.01506	2.04076	1.02284	1.05235	1.07264		8.45961	8.0514	8.57996	7.66244	9.80681	7.23719	11.7906	8.62379	8.53352	12.4262		8.35285	6.52544	7.8462	10.4764	10.8665	6.41689	8.39653	7.20992	8.19691	5.16907
8.00779	6.76342	8.22398	8.23651	8.43711	7.66605	9.44523	8.1423	10.1655	11.3258		1.02364	1.05931	1.00633	1.0868	1.08327	1.01667	2.0496	1.02589	1.05183	1.07371		8.69552	8.2478	8.4955	7.66887	9.80801	7.34833	12.1401	8.63553	8.60199	12.2386		8.42681	6.06867	7.80676	10.4553	10.8449	6.39043	8.33928	7.12846	8.35011	5.21234
8.21794	6.79739	8.14366	8.18577	8.40777	7.67516	9.44339	8.14975	10.1719	11.62		1.02137	1.05823	1.00802	1.08894	1.0864	1.01406	2.06779	1.02551	1.05271	1.07286		8.84478	8.08694	8.93709	7.6476	9.78065	7.21816	11.986	8.57071	8.59754	12.4931		8.4145	5.89121	7.80924	10.4513	10.7858	6.38691	8.42062	7.17706	8.4783	5.17149
8.07688	6.76394	8.20304	8.23369	8.41939	7.68943	9.41291	8.14449	10.1285	11.4572		1.02433	1.0594	1.00769	1.09308	1.11231	1.01261	2.05764	1.024	1.05243	1.0744		8.55376	8.13578	8.70288	7.64578	9.82402	7.33194	12.2684	8.59578	8.60334	12.5379		8.37796	6.21402	7.75989	10.4606	10.6823	6.3797	8.42578	7.02823	8.12874	5.11062
8.05261	6.77179	8.09972	8.25321	8.41698	7.6163	9.41132	8.14327	10.1712	11.3036		1.00584	1.05981	1.00727	1.09172	1.0702	1.01464	2.07264	1.02687	1.05341	1.07367		8.79168	8.11167	9.04717	7.64996	9.80336	7.28793	12.0908	8.62993	8.61759	12.3852		8.41046	6.16108	7.75201	10.4526	10.8271	6.32492	8.42225	7.09037	8.10015	5.10987
8.23042	6.77921	8.18051	8.22157	8.40112	7.64655	9.39192	8.16451	10.1527	11.4819		1.00682	1.06007	1.0114	1.08622	1.07623	1.01685	2.12038	1.02697	1.05137	1.0729		8.61754	8.15631	9.05988	7.65245	9.81716	7.35182	12.1355	8.56447	8.62047	12.396		8.42604	6.249	7.90917	10.3932	10.7018	6.40482	8.35696	7.05526	8.32719	5.13502
8.04149	6.77112	8.14336	8.22989	8.4077	7.71954	9.42326	8.13329	10.139	11.4415		1.01904	1.0665	1.0053	1.08468	1.0846	1.01596	2.03002	1.02666	1.0526	1.07131		8.52559	8.09168	8.46613	7.6393	9.78796	7.2744	12.0421	8.58449	8.66686	12.3926		8.48371	6.49476	7.90033	10.3761	10.6693	6.39237	8.43967	7.02462	8.6052	5.13183
7.96963	6.75932	8.17296	8.22148	8.40776	7.6837	9.4385	8.13155	10.1503	11.2957		1.02158	1.06765	1.01099	1.0811	1.07558	1.01786	2.0653	1.02353	1.05224	1.07221		8.49008	8.13252	8.79718	7.66457	9.81504	7.2659	12.1746	8.59002	8.58963	12.3445		8.47369	6.08825	7.77268	10.3793	10.6636	6.35473	8.39075	6.94907	8.24531	5.0993
8.11208	6.75256	8.10012	8.21628	8.4249	7.62028	9.40237	8.12481	10.171	11.6117		1.016	1.06481	1.00767	1.0856	1.079	1.01778	2.02598	1.02971	1.04912	1.07246		8.60764	7.98849	9.14816	7.65871	9.76785	7.24917	12.3992	8.54714	8.53863	12.1579		8.40376	6.47368	7.85153	10.4342	10.715	6.38261	8.42574	6.9723	8.12538	5.12471
8.02612	6.76218	8.1522	8.22149	8.40813	7.50647	9.39403	8.12542	10.1134	11.4669		1.01813	1.06724	1.0088	1.08445	1.07602	1.01968	2.06902	1.02576	1.04949	1.07225		9.05739	8.0635	8.75906	7.64499	9.736	7.25366	12.164	8.55006	8.52293	12.2503		8.39465	6.12904	7.67676	10.4511	10.7535	6.40459	8.34835	7.00931	8.44836	5.15629
8.05818	6.75355	8.21347	8.21122	8.42304	7.53893	9.30529	8.1359	10.1357	11.4607		1.0239	1.06254	1.01002	1.0817	1.06517	1.01836	2.05228	1.02336	1.04999	1.07386		8.91009	8.08553	8.26792	7.64032	9.74761	7.33823	12.1454	8.63546	8.60168	12.2933		8.42889	6.1366	7.82643	10.5024	10.796	6.38539	8.35567	6.99605	8.37382	5.16117
8.04948	6.773	8.24624	8.22351	8.40558	7.6069	9.34852	8.14645	10.1542	11.2952		1.02005	1.06145	1.00901	1.0737	1.07591	1.02042	2.02573	1.03275	1.05145	1.07363		8.64034	8.28893	8.33508	7.64761	9.79398	7.29738	11.867	8.54676	8.52648	12.1666		8.4401	6.32454	7.71369	10.5222	10.766	6.40821	8.32899	7.04918	8.15043	5.06109
8.12398	6.74363	8.14754	8.21902	8.3969	7.54368	9.33409	8.09889	10.1536	11.3149		1.02669	1.05841	1.00831	1.0809	1.0906	1.01997	2.05986	1.02652	1.05042	1.07431		8.58852	8.21633	8.31929	7.64051	9.78836	7.2675	11.7023	8.5932	8.62037	12.2378		8.35676	6.38603	7.88554	10.4983	10.7818	6.41954	8.33304	7.05565	8.47566	5.16873
7.92941	6.73499	8.2018	8.22719	8.39705	7.5727	9.30086	8.12588	10.1173	11.4526		1.01209	1.05924	1.00763	1.08541	1.10543	1.01614	2.01384	1.02674	1.05145	1.07355		9.08241	8.05433	8.74093	7.63571	9.75785	7.36205	11.7501	8.57541	8.5169	12.4145		8.36893	6.14883	7.87612	10.5245	10.8069	6.34539	8.40645	7.05995	8.40241	5.09953
8.04213	6.75552	8.17891	8.209	8.38605	7.57926	9.30711	8.13675	10.1181	11.428		1.02097	1.06242	1.00806	1.07968	1.07152	1.01675	2.03436	1.0291	1.05106	1.07478		9.00627	8.01848	8.48911	7.63299	9.81395	7.28003	12.0708	8.51999	8.66757	12.1796		8.42527	6.30646	7.94673	10.5099	10.7763	6.4009	8.38325	7.07286	8.44342	5.04155
8.11816	6.75205	8.2093	8.21182	8.39446	7.64536	9.24827	8.0888	10.097	11.4265		1.02338	1.05849	1.01332	1.07946	1.0851	1.01846	2.08318	1.02599	1.05141	1.07415		9.65658	8.18703	8.46977	7.63837	9.80712	7.23743	11.4823	8.54262	8.62044	12.1738		8.41161	6.10987	7.84785	10.5263	10.7643	6.32073	8.28115	7.06243	8.19146	5.12858
8.11739	6.75131	8.20112	8.23589	8.3715	7.55624	9.24503	8.09084	10.0525	11.418		1.02954	1.05571	1.0113	1.08113	1.08104	1.01496	2.09328	1.02516	1.05056	1.07316		9.44952	7.98779	9.25123	7.62646	9.80067	7.32929	11.8947	8.56455	8.55233	12.3398		8.39064	6.20011	7.86379	10.4998	10.7674	6.4036	8.39965	7.08764	8.47019	5.0358
8.04213	6.7566	8.15336	8.21879	8.39756	7.55621	9.27405	8.13988	10.0715	11.3943		1.02116	1.05861	1.013	1.07645	1.06744	1.01495	2.06753	1.026	1.05059	1.07497		9.19735	8.14247	9.4863	7.6313	9.75281	7.24376	11.7637	8.60994	8.53304	12.1162		8.41425	6.0694	7.90534	10.5061	10.784	6.36295	8.3091	7.1516	8.37965	5.08286
7.95196	6.75463	8.23122	8.22372	8.40905	7.65132	9.29255	8.1128	10.0469	11.3781		1.01944	1.05936	1.009	1.07115	1.06507	1.01624	2.09044	1.0299	1.05034	1.07279		9.33459	8.12957	9.48081	7.6373	9.70097	7.29252	12.0347	8.50966	8.56836	11.9475		8.4163	6.43661	7.91521	10.4929	10.8231	6.34825	8.41973	7.13022	8.18948	5.11761
8.15009	6.76993	8.29787	8.2101	8.38138	7.46282	9.29028	8.08178	10.0719	11.2493		1.02468	1.05202	1.0059	1.07436	1.07229	1.01243	2.06873	1.02653	1.05123	1.07539		9.5599	8.05958	8.77117	7.62117	9.78802	7.22986	11.799	8.53431	8.51481	12.2115		8.43042	6.26444	8.04559	10.501	10.6925	6.36932	8.35414	7.12712	8.42608	5.06726
8.10015	6.75255	8.20761	8.1864	8.38129	7.55771	9.32538	8.12207	10.0811	11.4921		1.02101	1.05318	1.00549	1.07497	1.06612	1.0145	2.04438	1.0255	1.04882	1.07232		9.37325	8.05501	8.45889	7.61356	9.74292	7.31549	12.1766	8.54278	8.55197	12.3596		8.47199	6.22276	7.77842	10.5314	10.8052	6.3405	8.31894	7.07827	8.31416	5.00863
8.02671	6.7698	8.29435	8.22586	8.38387	7.53204	9.25276	8.10522	10.1032	11.5344		1.01843	1.05412	1.00608	1.07641	1.08882	1.01445	2.0177	1.02952	1.04882	1.0736		9.40657	8.09593	8.37046	7.61539	9.76091	7.26597	11.975	8.60961	8.48226	12.3334		8.37854	6.27667	7.91955	10.5899	10.6742	6.33393	8.38548	7.12104	8.20679	5.0651
8.04053	6.74494	8.23044	8.23032	8.39107	7.4898	9.21043	8.0843	10.106	11.1829		1.02679	1.05275	1.00767	1.07864	1.08081	1.01425	2.04335	1.02366	1.0496	1.07376		9.18791	8.11137	8.34965	7.6368	9.70311	7.32634	12.3609	8.58471	8.5643	12.4365		8.43872	6.13223	7.96189	10.6203	10.7544	6.30963	8.31898	7.08359	8.24679	5.03614
8.02868	6.74743	8.26342	8.21738	8.37973	7.61007	9.20623	8.12633	10.0802	11.6478		1.01872	1.0534	1.00906	1.07719	1.08537	1.01318	2.07698	1.02455	1.05096	1.07306		8.77049	8.12323	8.2589	7.6293	9.69552	7.26673	11.9913	8.48901	8.51428	12.2968		8.40152	6.28197	7.8227	10.6545	10.7741	6.34501	8.25737	6.98257	8.38179	5.14158
7.90528	6.75034	8.21552	8.20917	8.38798	7.57855	9.19406	8.07118	10.0907	11.334		1.016	1.05885	1.00897	1.07685	1.05706	1.01113	2.07835	1.02825	1.05096	1.07383		8.80762	8.12193	8.22329	7.61347	9.74123	7.3005	12.2528	8.53494	8.55199	12.0191		8.44119	6.22257	7.81667	10.6609	10.7668	6.36802	8.3433	7.03689	8.12345	5.13186
8.01688	6.7647	8.11183	8.19138	8.37918	7.67197	9.20203	8.08014	10.074	11.4679		1.02559	1.06293	1.00982	1.07091	1.09456	1.0097	2.03807	1.02522	1.05023	1.07281		8.77175	8.01566	8.32664	7.61319	9.68054	7.33977	12.2131	8.53529	8.54749	12.1732		8.38325	5.98401	7.89873	10.6566	10.8336	6.38832	8.39343	6.93268	8.22172	5.17778
8.007	6.71133	8.21259	8.18709	8.40996	7.53979	9.21921	8.11906	10.1079	11.4806		1.02729	1.06437	1.00758	1.07521	1.06989	1.01205	2.04667	1.02806	1.05114	1.07383		9.08958	8.12739	8.88837	7.60175	9.66628	7.27113	11.7727	8.53496	8.5875	12.393		8.40493	6.17893	7.83503	10.6462	10.8213	6.35879	8.37616	6.87116	8.50297	5.07227
7.99726	6.73276	8.18051	8.22776	8.38659	7.59682	9.25739	8.08348	10.1038	11.3573		1.02685	1.05409	1.00881	1.07504	1.07617	1.01256	2.03442	1.0251	1.05079	1.07435		8.72514	8.03767	8.62199	7.61112	9.73925	7.28046	12.0375	8.50523	8.59557	12.3432		8.48071	5.9016	7.84779	10.654	10.795	6.37105	8.27956	6.91881	8.39244	4.99777
7.96624	6.74571	8.20057	8.23177	8.37048	7.62058	9.22623	8.06033	10.0683	11.3172		1.01998	1.05333	1.01115	1.07945	1.10018	1.01284	2.03266	1.02672	1.04947	1.07576		9.08327	8.10451	8.54828	7.59459	9.76137	7.23562	11.6273	8.54121	8.61738	12.1955		8.39403	6.03678	7.62401	10.6776	10.8127	6.37242	8.27223	6.83251	8.24284	5.06029
7.93153	6.73768	8.16894	8.20353	8.3803	7.6059	9.28916	8.10522	10.0887	11.4337		1.02564	1.05777	1.0106	1.07392	1.08306	1.01306	1.97645	1.02512	1.04983	1.07563		9.28933	8.01525	8.29056	7.60689	9.74766	7.29117	11.471	8.45165	8.48981	12.2438		8.35529	6.01086	7.6613	10.6326	10.7483	6.31879	8.36034	6.88145	8.32999	5.12982
7.96336	6.73565	8.18318	8.20455	8.39621	7.65393	9.25623	8.0628	10.0542	11.2881		1.02387	1.05815	1.00588	1.07983	1.10559	1.01254	2.04753	1.02368	1.04778	1.07335		9.3978	8.10106	8.20899	7.59235	9.72217	7.19598	11.693	8.46486	8.58458	12.3874		8.4315	6.1794	7.6552	10.5743	10.8661	6.37162	8.29915	6.89065	8.12783	5.03568
8.10994	6.73579	8.11727	8.20208	8.38057	7.52817	9.29973	8.05726	10.0439	11.3137		1.02627	1.05949	1.00319	1.08095	1.07328	1.01246	2.04355	1.02747	1.04761	1.07515		8.56872	7.97003	9.00103	7.58873	9.68874	7.25255	11.6166	8.45523	8.58325	12.1286		8.366	5.96988	7.7964	10.5175	10.6914	6.29032	8.38173	6.87732	8.18363	5.04337
7.98956	6.73131	8.17211	8.16748	8.36781	7.59342	9.32138	8.10247	10.0974	11.5903		1.0263	1.05542	1.01143	1.07985	1.09964	1.01129	2.06621	1.02845	1.04687	1.0737		8.84599	8.04908	8.56134	7.62517	9.71953	7.29415	11.5171	8.44477	8.52024	12.1521		8.31695	6.02572	7.74506	10.574	10.7491	6.36278	8.34242	6.90101	8.14286	5.01824
8.04444	6.72218	8.1393	8.19097	8.36834	7.47356	9.29528	8.08288	10.0365	11.4885		1.0199	1.05663	1.00513	1.08216	1.10818	1.01713	2.05962	1.02469	1.04661	1.07413		8.74018	7.9764	8.55536	7.59486	9.6699	7.20162	11.632	8.50733	8.50545	12.1129		8.35543	6.30578	7.74888	10.5714	10.7349	6.30238	8.26628	6.93827	8.13229	5.13951
7.9521	6.74355	8.06866	8.21033	8.34863	7.40032	9.33184	8.05166	9.99937	11.2172		1.01869	1.05738	1.00556	1.0765	1.08494	1.01365	1.99644	1.02717	1.04542	1.07588		8.72699	8.05663	9.2225	7.59242	9.71558	7.27375	11.4392	8.49884	8.45039	11.9907		8.40549	5.93526	7.99472	10.5743	10.7985	6.342	8.36678	6.96821	8.30665	5.08093
7.96953	6.73085	8.13757	8.18302	8.3632	7.52004	9.34117	8.09562	10.0403	11.191		1.04088	1.05431	1.00832	1.07855	1.09445	1.01492	2.07536	1.02737	1.04535	1.07466		8.97224	7.9861	9.35268	7.58811	9.69705	7.24754	11.875	8.49915	8.54535	12.046		8.39437	6.1415	7.85629	10.5352	10.7018	6.30656	8.24425	6.95012	8.20361	5.1645
7.97345	6.73247	8.05431	8.20811	8.37057	7.59796	9.40333	8.05148	10.0134	11.0472		1.02659	1.05855	1.00796	1.07719	1.08008	1.0136	2.07108	1.02808	1.04592	1.07318		8.47336	8.12799	9.38829	7.58854	9.65979	7.23914	11.8898	8.47011	8.42041	12.0936		8.42041	6.09269	7.88104	10.5702	10.6999	6.2989	8.32075	6.9775	8.44252	5.02157
8.02992	6.74165	8.15791	8.19707	8.35127	7.44175	9.37544	8.03685	9.99202	11.3204		1.03472	1.06098	1.0068	1.07219	1.09887	1.01035	2.06582	1.02807	1.04519	1.0745		8.78593	7.95554	9.40995	7.58244	9.65181	7.26886	11.912	8.44587	8.43243	12.0379		8.47737	5.96416	8.06272	10.5719	10.7437	6.34134	8.23084	6.95117	8.01622	5.08042
8.02536	6.71411	8.01058	8.1755	8.37825	7.646	9.39756	8.0918	10.0289	11.1797		1.02727	1.05855	1.01201	1.06755	1.12447	1.01403	2.04463	1.02354	1.04582	1.07572		9.2841	8.12863	8.69014	7.57787	9.67808	7.28015	11.8847	8.47439	8.45166	12.2454		8.44115	6.14127	7.96697	10.557	10.7756	6.28529	8.36131	6.95699	8.00335	5.1123
7.79714	6.72764	8.04648	8.18463	8.35944	7.49451	9.31248	8.06196	9.99743	11.1851		1.023	1.05308	1.01117	1.07714	1.08962	1.00756	2.01652	1.02635	1.04612	1.07411		8.74567	8.14591	9.08073	7.60169	9.65269	7.16866	11.9983	8.48793	8.48895	12.1993		8.44601	6.15193	7.83855	10.5768	10.7989	6.30614	8.33054	6.9332	8.16906	5.06117
7.70837	6.73644	8.08303	8.20848	8.37187	7.60803	9.35422	8.01528	9.96178	11.3168		1.03317	1.04773	1.00768	1.07547	1.09487	1.00723	2.01626	1.02333	1.04558	1.07558		8.84806	8.11852	8.22554	7.57795	9.63184	7.32172	11.8654	8.45756	8.51748	12.1418		8.45796	6.07803	7.98681	10.595	10.7969	6.34818	8.34835	6.98115	8.0976	5.08574
8.02555	6.72437	8.12064	8.2113	8.35408	7.59854	9.34972	8.06847	10.0015	11.2766		1.02825	1.05478	1.00474	1.07789	1.08783	1.00991	2.00886	1.02438	1.0458	1.0765		9.01279	7.97342	8.67991	7.57683	9.65902	7.24696	11.901	8.44954	8.45437	12.0424		8.40445	6.17349	7.80921	10.5996	10.73	6.31614	8.3387	6.92226	8.0048	5.01486
7.95914	6.72693	8.05977	8.17395	8.38316	7.53787	9.3407	8.05717	10.0179	11.1523		1.031	1.05474	1.00621	1.07417	1.07976	1.01012	2.036	1.02785	1.04659	1.07563		8.80831	8.07406	9.10132	7.58786	9.63289	7.18385	11.5339	8.41973	8.47857	12.2447		8.41948	5.86583	7.92484	10.6059	10.8062	6.32663	8.35461	6.92567	8.16812	5.02432
7.94257	6.72224	8.09318	8.22765	8.35485	7.55386	9.32451	8.02729	9.99813	11.15		1.02918	1.05711	1.0076	1.07469	1.08055	1.00879	2.0244	1.02568	1.0457	1.07461		8.97228	7.95359	8.44655	7.58177	9.63997	7.31515	11.8026	8.3619	8.5324	12.1527		8.46113	5.95674	7.80048	10.5751	10.8031	6.32174	8.27916	6.91811	8.31716	5.02574
7.94506	6.70606	8.02901	8.21457	8.36253	7.53644	9.28819	8.05931	10.0531	11.4358		1.02411	1.06177	1.01043	1.06921	1.09726	1.00928	1.99512	1.02515	1.04595	1.07656		8.5719	7.94041	8.73311	7.58745	9.66802	7.24362	11.9029	8.48784	8.47529	12.1862		8.35696	5.97674	7.71882	10.5851	10.7976	6.3251	8.35735	6.83973	8.24264	5.04929
7.94689	6.72487	8.16429	8.20466	8.35105	7.56921	9.29354	8.04843	10.0462	11.5511		1.03194	1.0603	1.01096	1.07211	1.07921	1.0085	2.04985	1.02788	1.04538	1.07668		8.66233	8.06136	9.01972	7.57987	9.65811	7.27908	11.5031	8.39307	8.58272	12.3732		8.4214	5.78758	7.75111	10.5856	10.7588	6.33506	8.38758	6.89622	8.40084	5.07728
8.0253	6.71929	8.11086	8.18422	8.35843	7.56285	9.26328	7.99808	10.0075	11.255		1.03203	1.0634	1.006	1.07432	1.05002	1.01137	2.05063	1.02752	1.04651	1.07505		8.83207	8.07586	8.49031	7.56736	9.69722	7.26064	11.5063	8.38093	8.53129	12.5054		8.39699	6.16068	7.76638	10.6114	10.7839	6.28513	8.31165	6.82021	8.36693	5.0705
8.03707	6.69193	8.09852	8.21087	8.35843	7.53122	9.28398	8.04449	10.0458	11.4198		1.03531	1.05799	1.01159	1.06672	1.11007	1.00972	2.02244	1.02737	1.04597	1.07557		8.76379	8.08338	8.59495	7.58801	9.72796	7.22052	11.2907	8.45311	8.45348	12.4806		8.37027	6.1737	7.55097	10.6046	10.7757	6.30824	8.25558	6.7937	8.23184	5.01201
7.93979	6.69328	8.07809	8.17589	8.35561	7.58584	9.27475	8.03505	10.0339	11.1545		1.02784	1.05659	1.00636	1.0728	1.08501	1.01232	2.077	1.03039	1.04465	1.07682		8.69108	8.03438	9.34566	7.56538	9.68513	7.29885	11.5995	8.44226	8.4221	12.4312		8.37897	5.90665	7.64329	10.637	10.8168	6.31025	8.31519	6.82143	8.07042	5.11883
7.83925	6.71228	8.10464	8.20116	8.35753	7.4973	9.26826	8.01628	10.0172	11.3953		1.03405	1.0571	1.01252	1.07236	1.11119	1.01076	2.02237	1.02893	1.04492	1.07547		8.38129	7.90761	9.10315	7.57827	9.6811	7.29674	11.8345	8.50169	8.53156	12.5232		8.44274	6.14924	7.68154	10.5977	10.7631	6.27296	8.24099	6.84692	8.41601	5.10824
7.98097	6.69973	8.09849	8.18803	8.3334	7.51546	9.2347	8.05094	10.0146	11.4898		1.03066	1.04836	1.00832	1.07224	1.11043	1.01563	2.02444	1.03006	1.04511	1.07482		9.09142	7.97638	9.26432	7.57251	9.66149	7.1979	11.5417	8.50565	8.51804	12.4443		8.39954	6.00616	7.69217	10.6049	10.818	6.30145	8.32151	6.85475	7.92012	5.19155
8.00536	6.72016	8.12532	8.19898	8.31207	7.5321	9.24448	8.04985	10.0352	10.954		1.03271	1.05577	1.00665	1.07214	1.10138	1.01303	2.03421	1.03006	1.04537	1.07715		8.47031	8.04352	9.36894	7.56448	9.63857	7.24851	11.7643	8.44101	8.53328	12.3933		8.41709	6.33317	7.91511	10.6431	10.7713	6.31035	8.33498	6.82758	8.06603	5.11207
7.92521	6.69587	8.16193	8.21526	8.32101	7.54246	9.27151	7.98126	9.99896	10.9191		1.02611	1.06012	1.01062	1.08019	1.08299	1.01112	2.0576	1.03476	1.04665	1.07647		8.78417	8.01511	8.99078	7.56884	9.60993	7.28966	11.8689	8.37525	8.51725	12.2359		8.36295	5.81945	7.93064	10.633	10.8691	6.32175	8.30701	6.83571	7.98716	5.11827
7.95804	6.7257	8.15438	8.18377	8.33112	7.4321	9.22248	8.03442	9.96301	11.3593		1.01887	1.05736	1.00929	1.08272	1.09248	1.01449	2.03079	1.03111	1.0457	1.07607		8.92039	7.88605	8.47858	7.54564	9.64888	7.16504	11.3235	8.47481	8.46563	12.3568		8.38676	6.00458	7.85485	10.6555	10.7012	6.26003	8.32176	6.89462	8.25774	5.00799
8.08951	6.71152	8.19802	8.17389	8.3249	7.56713	9.18788	8.05051	10.007	11.2188		1.0332	1.05436	1.01057	1.0819	1.07466	1.0118	2.0195	1.03511	1.0455	1.07339		8.77342	8.14495	8.42796	7.56212	9.64503	7.16007	11.4635	8.46909	8.53684	12.2792		8.36802	5.99097	7.85248	10.7001	10.7413	6.34557	8.31092	6.79999	8.35232	5.0864
7.98362	6.71799	8.18879	8.22024	8.33162	7.52713	9.19995	7.98399	9.9871	11.191		1.03335	1.05442	1.00777	1.07441	1.07576	1.01232	2.04302	1.0325	1.04531	1.07374		8.53667	8.0324	8.78489	7.54862	9.6423	7.29138	11.7269	8.40784	8.54236	12.1975		8.39885	6.07546	7.83452	10.6819	10.6845	6.2417	8.29664	6.84602	8.09883	4.9835
7.83545	6.72649	8.12818	8.20078	8.34547	7.36673	9.18031	8.03202	9.99934	11.0485		1.03048	1.04949	1.00721	1.07876	1.06559	1.01283	2.04061	1.03435	1.04586	1.07649		8.72453	7.99451	8.52802	7.53617	9.62214	7.3848	11.5937	8.40721	8.55823	12.3861		8.46363	6.27141	8.00074	10.6509	10.7296	6.28502	8.30269	6.81492	8.13049	4.97476
7.83177	6.73069	8.17026	8.16393	8.31582	7.41341	9.18655	8.02332	9.98532	11.4695		1.04208	1.04872	1.01101	1.08478	1.08577	1.01327	2.03885	1.03281	1.04446	1.07392		8.75159	7.95808	9.09922	7.5474	9.65315	7.22395	11.3296	8.44958	8.49962	12.4349		8.4112	6.30949	7.88267	10.66	10.7176	6.22789	8.33216	6.88896	8.11105	5.14268
8.02983	6.71959	8.13702	8.20718	8.31488	7.50634	9.20287	8.00023	9.9663	11.1836		1.0319	1.04981	1.00589	1.0805	1.09039	1.01218	2.0398	1.03526	1.0464	1.07598		8.41097	7.93328	9.14086	7.54659	9.63497	7.2286	11.3678	8.35112	8.5072	12.2246		8.40389	5.82104	7.87679	10.6525	10.751	6.28524	8.28869	6.85094	8.30995	5.01982
7.85997	6.73762	8.12838	8.18562	8.34801	7.46752	9.19316	7.99209	9.96318	11.1917		1.02775	1.0503	1.01134	1.08465	1.09402	1.01365	1.99214	1.03557	1.04262	1.07506		8.88259	7.8722	8.93101	7.54742	9.64507	7.21389	11.5878	8.3206	8.38415	12.3131		8.36512	6.03821	7.69553	10.7128	10.7288	6.27438	8.35306	6.86437	8.36378	5.0927
7.91795	6.73592	8.14016	8.19491	8.34564	7.40639	9.24341	8.01634	9.9758	10.9163		1.03183	1.05478	1.00688	1.08277	1.07577	1.00942	2.03865	1.03574	1.04464	1.07548		8.76915	7.93052	8.8263	7.53756	9.59121	7.29688	11.6308	8.38636	8.52105	12.4143		8.38713	6.03731	7.73096	10.7105	10.6989	6.2682	8.25668	6.9099	8.08898	5.0721
7.83935	6.72989	8.19954	8.18863	8.33901	7.42838	9.22849	7.99735	9.96697	11.33		1.0336	1.05373	1.00936	1.08484	1.0824	1.00835	2.02916	1.03514	1.04271	1.0762		8.69015	8.01721	8.87268	7.53411	9.59204	7.25047	11.6585	8.36036	8.43965	12.2428		8.39123	5.92281	7.54172	10.7408	10.8399	6.25564	8.2568	6.82574	7.97841	4.98759
7.86765	6.70473	8.14839	8.18233	8.34529	7.60137	9.22184	8.01963	9.98412	11.2988		1.04283	1.05164	1.01172	1.08624	1.11911	1.00671	2.03542	1.03477	1.04363	1.07438		8.99246	7.98962	8.80603	7.53959	9.58238	7.21612	11.7107	8.35916	8.56954	12.2975		8.42893	6.02827	7.61683	10.7075	10.7694	6.28313	8.27776	6.78678	8.16201	5.03609
7.73394	6.69508	8.12178	8.18859	8.33582	7.39219	9.22408	8.0183	10.0052	11.1705		1.03737	1.05396	1.01041	1.0905	1.10048	1.00979	2.04261	1.03496	1.04272	1.07664		8.58331	8.00215	9.44086	7.55785	9.645	7.24999	11.3103	8.36344	8.48633	12.3788		8.37755	6.06154	7.56733	10.6635	10.7854	6.26437	8.25629	6.82192	8.22406	5.09165
8.014	6.68889	8.11375	8.21163	8.35317	7.5913	9.29331	7.9744	9.96505	11.0602		1.03514	1.05325	1.01229	1.08575	1.07461	1.00699	2.04092	1.03174	1.0437	1.07647		8.74819	7.91808	9.28868	7.53527	9.64478	7.28686	11.7802	8.42233	8.47428	12.2791		8.34642	6.06445	7.55644	10.648	10.6817	6.25375	8.26468	6.79523	8.31407	5.06037
7.75924	6.67972	8.14428	8.18083	8.34805	7.50397	9.31786	7.99884	9.97221	11.1918		1.03896	1.04449	1.00684	1.09198	1.0776	1.00787	2.07464	1.03708	1.04412	1.0758		9.33522	8.02956	9.08302	7.54022	9.65856	7.29016	11.4924	8.38078	8.44605	12.4302		8.40929	5.90069	7.73189	10.6603	10.7696	6.24306	8.30164	6.78902	8.20562	5.12134
7.89229	6.68937	8.12497	8.17762	8.32843	7.59999	9.25636	8.03723	10.0294	11.4558		1.05413	1.04401	1.00522	1.09399	1.07384	1.0086	2.01801	1.03344	1.04343	1.07631		9.09513	7.97425	9.30078	7.5361	9.65914	7.20592	11.5135	8.41386	8.54714	12.4799		8.37219	6.00792	7.80519	10.6506	10.7014	6.25451	8.27631	6.79669	8.0319	5.12414
7.94171	6.66758	8.11133	8.19394	8.34025	7.38518	9.24789	7.98588	9.95579	11.0109		1.04043	1.04288	1.00741	1.09457	1.04712	1.01122	1.97554	1.03354	1.04309	1.07411		9.3428	7.90579	9.37406	7.5146	9.63288	7.27421	11.5855	8.34923	8.46434	12.3225		8.37705	5.85821	7.82768	10.6637	10.7154	6.27323	8.27353	6.82235	8.08625	4.99676
8.00533	6.69183	8.12694	8.19612	8.32272	7.38559	9.32379	7.98494	9.98143	11.14		1.03486	1.0552	1.00269	1.0954	1.06807	1.0111	2.03736	1.03361	1.04402	1.07547		9.5609	7.84821	8.64778	7.52176	9.61293	7.29845	11.6868	8.2799	8.46671	12.4002		8.38122	6.08014	7.92994	10.6174	10.793	6.28834	8.22889	6.80818	8.28822	5.00097
7.98285	6.69138	7.97786	8.18223	8.33261	7.3371	9.23433	8.00695	9.99636	11.4011		1.0416	1.05082	1.00859	1.09172	1.08572	1.00872	2.06397	1.03705	1.04332	1.07735		9.71553	7.79237	8.97714	7.51853	9.61042	7.20477	11.7558	8.33448	8.53764	12.4947		8.37658	5.85422	7.81691	10.6649	10.7019	6.27151	8.35842	6.74808	8.27753	5.0931
8.11552	6.68002	7.99417	8.20696	8.33837	7.42418	9.29621	7.95854	9.96725	11.1469		1.04373	1.04448	1.00787	1.08919	1.0745	1.00848	2.03487	1.03444	1.04337	1.07555		9.85361	7.8888	8.301	7.54063	9.5673	7.27508	11.4759	8.37411	8.41825	12.3895		8.34772	6.00952	8.01455	10.633	10.7736	6.23338	8.30952	6.78784	8.15298	5.08782
7.94239	6.70083	8.03289	8.1921	8.33456	7.37168	9.29718	7.97303	9.9551	11.1449		1.04504	1.04353	1.01159	1.09858	1.08101	1.00818	2.02793	1.03634	1.04486	1.07585		9.33687	8.03574	8.54124	7.52614	9.59349	7.23684	11.8755	8.30424	8.45364	12.4982		8.36407	6.05958	7.87147	10.6431	10.8324	6.26744	8.25808	6.7435	7.93095	4.9614
7.77513	6.70488	7.99019	8.19816	8.32591	7.40993	9.21576	8.02224	9.97447	11.2559		1.03676	1.05126	1.0106	1.09777	1.08231	1.01005	2.0536	1.03325	1.04723	1.07516		9.34937	7.86209	8.54356	7.53375	9.56391	7.3216	11.5875	8.36248	8.49644	12.5695		8.3232	5.90691	7.73893	10.608	10.86	6.20646	8.33146	6.79867	8.14917	5.12212
7.89836	6.67784	8.07384	8.16488	8.29903	7.43374	9.18198	7.96547	9.97255	11.253		1.043	1.04831	1.01135	1.09037	1.05672	1.00824	2.01344	1.03377	1.04729	1.07454		9.36001	7.8743	8.4068	7.52922	9.57147	7.20381	11.6705	8.36588	8.52497	12.4669		8.41396	5.87987	7.91327	10.6175	10.732	6.2779	8.32577	6.7307	8.0945	5.08784
8.01117	6.67983	7.95304	8.17696	8.31396	7.5062	9.24026	7.97015	9.96522	11.0842		1.0374	1.05228	1.00733	1.09667	1.09532	1.00948	2.0151	1.03418	1.04915	1.07472		9.73725	7.91622	8.88897	7.5206	9.58515	7.1744	11.6873	8.33371	8.50473	12.4011		8.38872	5.76431	7.68444	10.6681	10.6479	6.25515	8.25694	6.72962	8.18825	4.99986
7.94632	6.67732	8.09991	8.16332	8.27778	7.41412	9.23433	8.00162	9.97116	11.0887		1.04559	1.04678	1.01058	1.0979	1.07008	1.00652	2.08001	1.03679	1.05055	1.07488		9.6244	7.86095	9.29372	7.50946	9.6083	7.30403	11.1908	8.40318	8.49448	12.5494		8.39528	6.00439	7.58625	10.6235	10.7457	6.26641	8.30075	6.73235	8.04914	5.02492
8.03202	6.67643	8.0159	8.17456	8.28205	7.39639	9.24571	7.96844	9.96851	11.3977		1.03796	1.04966	1.01015	1.09317	1.0554	1.00807	2.07601	1.03545	1.05319	1.07414		9.24074	7.86789	9.20707	7.52535	9.57077	7.19941	11.6559	8.30681	8.47595	12.4576		8.39284	6.11136	7.69188	10.6192	10.6341	6.2665	8.28673	6.73104	8.04527	5.08738
7.87835	6.68175	8.0638	8.18539	8.30624	7.43318	9.23763	7.96395	9.92695	11.1163		1.0496	1.0513	1.01135	1.09183	1.06936	1.0082	2.03931	1.03644	1.055	1.07465		9.06113	8.03267	9.22145	7.51817	9.58576	7.27401	11.8523	8.30434	8.44206	12.3706		8.34801	5.87708	7.64657	10.604	10.7622	6.20596	8.31957	6.73732	8.17722	5.06313
7.82436	6.68964	8.05308	8.17944	8.3072	7.53936	9.21673	8.00257	9.9634	11.0711		1.04455	1.05057	1.00782	1.09851	1.07503	1.0091	2.03176	1.03286	1.05695	1.07524		9.0146	7.8617	9.18941	7.5134	9.52944	7.16347	11.6315	8.33376	8.56012	12.4363		8.32865	6.02366	7.51206	10.5946	10.6969	6.19914	8.29957	6.73115	8.0242	5.04294
7.81628	6.65893	8.0772	8.15784	8.29793	7.54392	9.21792	7.95566	9.93972	10.9645		1.04171	1.04612	1.01287	1.09563	1.0547	1.00612	2.06165	1.03695	1.05752	1.07527		9.24899	7.8906	9.13131	7.51018	9.57688	7.27693	11.4224	8.28524	8.41211	12.383		8.44805	5.99024	7.59397	10.5688	10.666	6.22422	8.26576	6.66475	8.03386	5.10265
7.907	6.67751	8.11669	8.16878	8.2769	7.34387	9.24375	7.95467	9.92888	11.0736		1.04391	1.04744	1.01068	1.09592	1.08412	1.00754	2.02735	1.03511	1.05753	1.07448		8.69871	8.03498	9.21928	7.50382	9.58293	7.2754	11.112	8.2762	8.52792	12.2432		8.34796	5.72104	7.66308	10.5828	10.7119	6.20207	8.28234	6.68435	8.13626	5.11172
7.9108	6.68334	8.11337	8.17344	8.2883	7.42969	9.2698	7.9658	9.94117	11.3691		1.0312	1.04906	1.01258	1.09435	1.08388	1.00953	2.09647	1.03661	1.06043	1.07486		9.27896	7.87205	9.24207	7.50045	9.603	7.26078	11.5759	8.27765	8.48726	12.1941		8.36772	6.1438	7.66186	10.597	10.7672	6.21545	8.22064	6.67688	7.99227	5.1288
7.79172	6.65505	8.02974	8.1687	8.30103	7.52562	9.22389	7.9416	9.91209	10.9305		1.0434	1.04808	1.00868	1.10116	1.07833	1.01061	2.06507	1.03415	1.0631	1.07417		9.05462	7.79974	9.33054	7.51183	9.60412	7.22037	11.286	8.26376	8.44979	12.1384		8.38364	6.03897	7.64386	10.6366	10.6732	6.25181	8.27339	6.72678	8.09772	5.09155
7.93332	6.66079	8.07647	8.173	8.28398	7.3869	9.19796	7.94449	9.91935	11.2126		1.03575	1.04974	1.00735	1.0937	1.0715	1.01334	2.11382	1.03672	1.06399	1.07392		8.80258	7.93047	8.33815	7.4946	9.59731	7.25878	11.2969	8.27074	8.39567	12.0965		8.38858	5.7806	7.6609	10.7627	10.7079	6.1835	8.30124	6.65658	7.90516	5.05373
7.983	6.65242	8.01661	8.19647	8.29286	7.40393	9.14525	7.96831	9.90418	11.3093		1.03958	1.04962	1.00585	1.09728	1.07858	1.01141	2.12519	1.03549	1.06823	1.0758		8.99921	8.02332	8.55562	7.49579	9.622	7.19458	11.4305	8.19711	8.54823	12.1701		8.33384	5.95123	7.58047	10.811	10.6796	6.21453	8.40359	6.65545	8.04281	4.95525
7.70504	6.64775	7.97971	8.16056	8.30179	7.35807	9.15481	7.95025	9.9142	11.1817		1.04439	1.04286	1.00654	1.09512	1.08351	1.01407	2.0951	1.03382	1.0648	1.07556		8.73584	7.94686	8.53642	7.47892	9.60608	7.1516	11.2667	8.31197	8.41206	12.2679		8.42571	6.14403	7.51567	10.8683	10.8031	6.21437	8.30941	6.75209	8.07201	5.01434
8.01771	6.63977	8.04394	8.17455	8.28304	7.34884	9.17489	7.9227	9.91924	11.0151		1.04775	1.04669	1.01073	1.09924	1.06036	1.013	2.10865	1.04035	1.06546	1.07527		9.07768	7.93019	9.15645	7.48459	9.5708	7.26436	11.5028	8.23562	8.43125	12.2369		8.37159	5.97013	7.60298	10.8363	10.742	6.19525	8.25744	6.68857	8.10672	4.97332
7.86871	6.66695	8.03234	8.17785	8.28296	7.41845	9.20032	7.96524	9.93335	11.0212		1.0334	1.05417	1.01144	1.09392	1.07423	1.01597	2.04573	1.03754	1.0668	1.07522		9.08058	7.85013	8.89436	7.48757	9.58736	7.21701	11.2966	8.22617	8.33697	12.1884		8.33058	5.89284	7.46799	10.8558	10.7291	6.24597	8.28024	6.6669	8.14996	5.018
7.85688	6.64977	8.10001	8.15734	8.28377	7.46919	9.19862	7.93267	9.90681	11.3078		1.04424	1.0513	1.00888	1.09714	1.05511	1.01489	2.10292	1.03779	1.06757	1.07529		9.10686	7.92206	8.94379	7.50108	9.54578	7.2807	11.3883	8.25844	8.42782	12.2327		8.41652	5.69032	7.419	10.8151	10.7135	6.25594	8.30058	6.6253	8.04157	5.04806
7.89916	6.64124	8.03168	8.20274	8.2905	7.46028	9.15022	7.90609	9.92974	11.4162		1.03829	1.04303	1.01109	1.09372	1.06621	1.0122	2.07948	1.03504	1.06639	1.07549		8.95242	7.84174	8.35458	7.50158	9.56208	7.24951	11.4634	8.23115	8.45962	12.236		8.36652	5.89515	7.45049	10.769	10.7295	6.20886	8.31639	6.68966	8.12623	5.09473
7.83873	6.63994	8.01289	8.18689	8.30365	7.47518	9.13284	7.93471	9.93898	10.957		1.03316	1.04409	1.01142	1.09517	1.07296	1.01192	2.0572	1.03994	1.06385	1.07438		9.32997	7.85713	8.42144	7.4882	9.52044	7.22977	11.3735	8.21419	8.41474	12.2997		8.33117	6.00383	7.38057	10.7868	10.6925	6.21778	8.25915	6.64437	8.05818	4.9881
7.96915	6.62951	8.00153	8.18448	8.28681	7.48073	9.15297	7.93318	9.90583	11.2508		1.03876	1.04155	1.01091	1.09859	1.05664	1.00984	2.02654	1.03758	1.06622	1.07606		8.86795	8.01417	9.09365	7.48853	9.54698	7.17375	11.0226	8.2597	8.42452	12.3679		8.34745	5.78648	7.24344	10.7827	10.7021	6.19781	8.28114	6.59826	8.07349	4.97994
7.95683	6.63987	8.02489	8.17731	8.30228	7.38654	9.18607	7.91216	9.89538	11.0901		1.041	1.03658	1.01183	1.09987	1.08076	1.00982	2.06896	1.03427	1.06474	1.07675		8.59024	7.75652	8.90942	7.48966	9.56899	7.27761	11.2353	8.25721	8.41106	12.5576		8.46937	6.09958	7.56982	10.7763	10.6544	6.19953	8.3302	6.63739	7.94535	5.12276
7.78025	6.6364	8.11936	8.17807	8.30484	7.35451	9.14297	7.92647	9.93386	11.2471		1.04372	1.03261	1.00564	1.09391	1.0995	1.00765	2.02179	1.03719	1.06515	1.07544		8.67811	8.0606	8.59067	7.4807	9.55865	7.20234	11.0313	8.23828	8.47544	12.5136		8.37191	5.8233	7.54574	10.7641	10.7015	6.1866	8.28492	6.62133	8.02205	5.10427
7.78283	6.6479	8.02921	8.15544	8.28106	7.29985	9.15613	7.92329	9.87528	11.088		1.04189	1.03834	1.01245	1.09838	1.07831	1.0072	1.98383	1.03638	1.06573	1.07412		9.178	7.84703	8.64334	7.49231	9.52912	7.16858	11.5041	8.20386	8.43173	12.4865		8.4206	6.22575	7.47691	10.7356	10.7524	6.21772	8.28175	6.62281	8.22219	4.99465
7.844	6.63026	8.05114	8.20048	8.28709	7.34472	9.15166	7.92924	9.8966	11.2456		1.02832	1.03905	1.01564	1.10093	1.09117	1.00715	2.04339	1.0368	1.06541	1.07506		8.6044	7.81269	9.16818	7.47764	9.50617	7.26782	11.3731	8.22967	8.41927	12.6268		8.41432	6.04281	7.42481	10.7197	10.7296	6.21983	8.31682	6.60173	8.03442	4.95647
7.74537	6.63263	8.00539	8.16569	8.29618	7.47076	9.17975	7.96883	9.91666	11.0902		1.03873	1.04191	1.00634	1.09811	1.06855	1.00959	2.00237	1.03953	1.06346	1.07456		9.09802	7.93122	9.14222	7.46988	9.49594	7.19462	11.3765	8.19426	8.48282	12.6341		8.34534	5.96962	7.49737	10.7129	10.6806	6.16228	8.26497	6.58309	8.08881	4.98263
7.74957	6.64843	8.08263	8.17341	8.31851	7.38665	9.15038	7.91645	9.90329	11.2484		1.04544	1.04047	1.01032	1.10148	1.0909	1.00907	2.06828	1.03821	1.06499	1.07558		9.33773	7.8526	9.4149	7.47248	9.57395	7.24514	11.2603	8.18181	8.50249	12.5236		8.4035	6.02284	7.47319	10.6968	10.6753	6.19757	8.29787	6.59392	8.06865	4.9272
7.72567	6.62544	8.00553	8.20301	8.30493	7.50862	9.14013	7.89554	9.88398	10.9515		1.04482	1.03735	1.01418	1.09788	1.0707	1.00734	2.00059	1.04122	1.0639	1.07683		9.36482	7.89244	8.81464	7.48352	9.56488	7.28418	11.1634	8.16641	8.38401	12.5911		8.4009	5.97477	7.53527	10.6675	10.7132	6.16481	8.28267	6.61076	7.9587	5.02442
7.82097	6.62316	8.08241	8.1549	8.29136	7.40183	9.16488	7.93955	9.87223	11.2536		1.03977	1.04562	1.00985	1.09978	1.10928	1.00761	2.06771	1.03759	1.06166	1.07746		8.91449	7.8418	8.87518	7.47211	9.58212	7.24211	11.1217	8.1542	8.45061	12.6443		8.44416	5.92355	7.29575	10.6423	10.7008	6.22404	8.27779	6.57226	8.10119	5.02762
7.75641	6.61836	8.02899	8.16492	8.2713	7.33328	9.13811	7.90962	9.83351	11.0909		1.04026	1.04377	1.01402	1.10126	1.06632	1.00889	1.95162	1.04102	1.0614	1.07618		8.90497	7.85778	8.91838	7.47891	9.50341	7.21617	11.2712	8.13904	8.38321	12.513		8.41251	6.02317	7.28142	10.6752	10.6881	6.21618	8.27296	6.57961	7.89271	5.01008
7.99908	6.62083	8.13544	8.20473	8.26413	7.47484	9.14616	7.8861	9.80243	11.1074		1.04793	1.04028	1.00592	1.09497	1.07985	1.00953	2.01247	1.0368	1.0629	1.07602		8.85447	7.87058	8.98646	7.50946	9.54501	7.17851	11.1795	8.16173	8.39712	12.5371		8.40234	6.01014	7.25107	10.6602	10.7729	6.18269	8.2767	6.54998	8.07583	5.001
7.9097	6.6353	8.02753	8.17041	8.25766	7.29078	9.11059	7.90963	9.86478	11.2358		1.04006	1.03952	1.0056	1.09617	1.06161	1.00915	2.03376	1.03984	1.0622	1.07582		9.30879	7.8222	8.72642	7.49992	9.49879	7.30649	11.3352	8.15468	8.41194	12.4017		8.35688	5.959	7.3523	10.6473	10.7451	6.19168	8.3457	6.55586	7.93631	4.99138
7.96272	6.61662	8.04823	8.17042	8.26242	7.38319	9.16952	7.90192	9.8554	11.0924		1.04428	1.03748	1.0089	1.09648	1.10381	1.00929	2.01961	1.04087	1.06184	1.07618		8.88039	7.77154	8.3401	7.49927	9.48771	7.20054	11.5091	8.19285	8.41295	12.3089		8.40545	5.93687	7.31687	10.6293	10.7636	6.20111	8.30257	6.59372	8.28187	5.05793
8.03026	6.62363	8.06733	8.17398	8.26049	7.26449	9.12339	7.87575	9.83039	11.1008		1.04225	1.04522	1.007	1.09926	1.07385	1.01014	2.00117	1.03933	1.05947	1.07605		8.85266	7.80843	8.43614	7.48975	9.45124	7.27734	11.5376	8.07637	8.37987	12.4598		8.35088	5.78156	7.3447	10.6222	10.7375	6.18476	8.21781	6.60881	7.90073	5.06506
8.06113	6.62344	8.08746	8.1965	8.26778	7.35608	9.11056	7.91125	9.89799	11.0761		1.04174	1.0413	1.00964	1.09478	1.08212	1.0088	2.01203	1.03966	1.0602	1.07465		8.7995	7.81411	9.10869	7.48025	9.50224	7.19589	11.6979	8.12508	8.42532	12.5206		8.32628	5.95204	7.42976	10.6018	10.728	6.1992	8.28838	6.5617	8.10679	4.94894
7.96464	6.61949	8.13928	8.18845	8.27646	7.32979	9.09756	7.89858	9.85664	11.2563		1.04508	1.03814	1.0137	1.10356	1.0614	1.00904	1.98815	1.03636	1.05724	1.07624		8.88559	7.92934	9.36354	7.48058	9.47706	7.30014	11.4571	8.18701	8.40465	12.3031		8.32338	5.94063	7.35689	10.6504	10.7555	6.2061	8.24149	6.61069	8.01415	5.01771
7.8338	6.61821	8.09601	8.16612	8.25182	7.39715	9.10122	7.87247	9.85975	11.2488		1.04221	1.03238	1.0071	1.1041	1.07702	1.01004	2.0326	1.03615	1.05688	1.07659		9.02325	7.96105	8.77729	7.4735	9.45921	7.17383	11.3301	8.19458	8.43573	12.405		8.4005	5.94897	7.25174	10.664	10.754	6.18609	8.3229	6.59458	7.97517	5.06266
7.81783	6.61183	8.04719	8.17706	8.26171	7.22705	9.08953	7.89137	9.89045	11.099		1.04084	1.0375	1.01249	1.0982	1.09651	1.01004	2.06904	1.03975	1.05622	1.07664		8.77707	8.10145	8.81303	7.47378	9.50903	7.25175	11.4665	8.15066	8.46025	12.3436		8.36269	5.96499	7.32018	10.6736	10.7175	6.1672	8.23778	6.54572	7.75694	5.01548
7.89048	6.6091	8.02193	8.16009	8.26661	7.44501	9.14978	7.88764	9.87363	10.9573		1.0364	1.03616	1.01161	1.10411	1.08443	1.0086	1.99963	1.03936	1.05439	1.07454		8.65012	7.84109	8.27026	7.48	9.50894	7.22783	11.2525	8.10587	8.32185	12.3326		8.30407	5.96899	7.38815	10.6912	10.6996	6.1612	8.20408	6.58233	8.07244	5.00126
7.90049	6.60425	8.03736	8.1531	8.27043	7.39755	9.10472	7.86022	9.84951	11.0536		1.04171	1.03829	1.00597	1.10154	1.08535	1.01022	2.03973	1.0388	1.05426	1.07753		8.67794	7.83367	8.68058	7.48924	9.48474	7.29493	11.1246	8.1262	8.3682	12.2277		8.23124	5.95882	7.26436	10.712	10.6872	6.16782	8.20249	6.54676	8.09253	4.91532
7.8918	6.60467	8.05105	8.16501	8.25405	7.27945	9.12153	7.90558	9.86912	11.0501		1.04745	1.03879	1.00846	1.10311	1.08674	1.01019	2.05531	1.03832	1.05231	1.07501		9.27378	7.96362	8.5338	7.47585	9.50502	7.27852	11.2546	8.16684	8.35415	12.2921		8.20658	5.632	7.26723	10.7174	10.6574	6.2048	8.30058	6.5675	7.95351	4.96821
8.03049	6.6059	8.06357	8.16967	8.28988	7.38159	9.13164	7.88594	9.86695	11.05		1.03794	1.04134	1.01363	1.10446	1.05854	1.01187	2.0357	1.03693	1.05147	1.0756		8.97792	7.86659	8.15964	7.47607	9.46344	7.232	11.2239	8.08672	8.36769	12.1685		8.24789	5.80234	7.30691	10.7552	10.719	6.19293	8.27396	6.54976	8.15436	4.92976
8.02948	6.62139	7.99805	8.16185	8.28137	7.28857	9.12917	7.85445	9.84144	10.9072		1.03529	1.04206	1.01519	1.10804	1.07249	1.01133	2.043	1.03654	1.05007	1.07592		9.09166	7.89943	8.60425	7.47377	9.56207	7.20762	11.4174	8.08553	8.47758	12.0382		8.32277	6.02886	7.11972	10.7618	10.7142	6.14612	8.31347	6.47697	7.94971	5.0373
7.90301	6.6183	7.99744	8.16818	8.27013	7.34087	9.12957	7.90542	9.86989	11.1841		1.03138	1.03871	1.01219	1.10805	1.0374	1.00924	2.05018	1.03925	1.04716	1.07422		8.74252	7.88456	9.32745	7.47191	9.50993	7.29095	11.2539	8.12198	8.38355	12.2979		8.25568	5.87964	7.23637	10.7808	10.765	6.21027	8.33124	6.50816	7.98011	4.94396
8.17423	6.62748	7.9937	8.18041	8.28084	7.43012	9.13305	7.88084	9.86732	10.9008		1.02753	1.04083	1.01267	1.11071	1.0695	1.00896	2.04162	1.03898	1.04438	1.07584		8.90838	7.91977	9.06772	7.48596	9.45718	7.16616	11.1991	8.09417	8.40409	12.1867		8.20174	5.95834	7.28999	10.8139	10.6574	6.17505	8.33883	6.519	8.27053	5.04015
7.93658	6.62081	8.00286	8.1951	8.26786	7.36735	9.16959	7.87439	9.83212	11.0412		1.04097	1.03372	1.01331	1.10598	1.07005	1.00992	2.04427	1.03997	1.04349	1.07589		8.88276	7.82707	9.12836	7.46701	9.52246	7.23832	10.8798	8.09089	8.40904	12.0593		8.15088	5.74544	7.2977	10.8056	10.6302	6.17018	8.29578	6.51628	8.14347	5.03495
7.87763	6.5937	7.87609	8.17264	8.26609	7.30895	9.12227	7.9014	9.86662	11.1734		1.03784	1.03851	1.01507	1.10918	1.05416	1.00821	2.06419	1.0389	1.04374	1.07514		9.18477	7.8268	9.09055	7.47026	9.52702	7.18302	11.5452	8.09333	8.42708	12.1657		8.09268	5.87319	7.29136	10.8015	10.7651	6.14901	8.24984	6.49329	7.94794	5.06664
7.94696	6.6064	7.95225	8.18782	8.26189	7.33216	9.13209	7.9013	9.85256	10.8748		1.04328	1.03618	1.01153	1.11519	1.07581	1.01058	2.03602	1.0395	1.03959	1.07756		8.68576	7.92556	8.98293	7.47377	9.47953	7.2398	11.1931	8.08021	8.43784	12.3108		8.29134	6.10149	7.38016	10.8012	10.6812	6.21427	8.22239	6.50125	8.08887	4.9154
7.94612	6.60733	7.99903	8.18757	8.2624	7.19531	9.15424	7.85953	9.83867	11.0453		1.03617	1.03758	1.00747	1.11105	1.07637	1.00617	2.03514	1.03803	1.04004	1.07647		8.88001	7.87623	8.72812	7.46185	9.4504	7.21718	11.1073	8.00169	8.43397	12.1662		8.31123	5.75354	7.31586	10.8004	10.7017	6.15387	8.3132	6.47126	8.0454	4.92156
7.90726	6.61302	7.94633	8.16811	8.26249	7.28118	9.13529	7.88324	9.8729	11.1726		1.0434	1.03123	1.01137	1.1047	1.04307	1.00368	2.02173	1.03858	1.03962	1.07588		8.79268	7.66411	8.53359	7.46187	9.4739	7.23914	11.0446	8.10808	8.45456	12.1864		8.13886	5.71148	7.33704	10.7685	10.7067	6.18174	8.15528	6.47253	8.08014	4.99668
7.90958	6.62747	7.94136	8.1694	8.26472	7.27581	9.11452	7.87656	9.85047	10.9913		1.04479	1.03899	1.00884	1.10456	1.06685	1.00513	1.98108	1.03873	1.0393	1.07681		8.90321	7.86988	9.23211	7.46026	9.41278	7.16793	11.2599	8.16029	8.42264	12.2662		8.19312	5.77026	7.34114	10.8068	10.7164	6.14193	8.23611	6.47074	8.24774	4.91772
