# Supplementary material for: UBR-1 deficiency leads to ivermectin resistance in Caenorhabditis elegans
Source: eLife journal article supplement (doi:10.7554/elife.103718), 2024-12-13
Supplement: data1 [file Figure 5-source data 5(F).xlsx]

## Sheet: Sheet1
	WT											ubr-1
0 µM	11.5428	10.1923	10.8885	12.9423	9.39383	9.80594	11.6363	9.05626	9.51134	14.3379		10.803	10.3259	9.2103	9.18125	11.074	13.1417	8.74749	13.1856	9.21212	13.0381
0.3 µM	8.79477	9.69678	10.8109	7.5756	13.2573	10.5364	7.72979	5.91721	9.51866	9.36109		10.0573	8.1575	10.9105	10.7849	10.1799	13.2749	14.6615	11.846	8.76845	9.23448
1 µM	3.23386	2.84642	4.3476	3.50244	5.0094	2.01799	7.21508	6.46748	3.13479	4.45807		10.427	9.34976	10.6216	12.3526	9.29281	4.45555	8.92619	10.2149	11.2399	10.3118
3 µM	1.12658	1.13242	1.05368	1.20011	1.28316	1.11768	2.50472	1.11384	1.14021	1.08253		8.51131	8.63845	8.06272	11.6872	11.1504	7.24099	9.11449	8.36464	8.79057	6.51784
10 µM	1.34728	1.11676	1.17655	1.07269	1.10584	1.07064	1.12432	1.24323	1.25695	1.12399		4.45555	5.71058	6.36699	5.54838	7.67312	7.45176	4.97211	4.5501	8.65648	7.70631
30 µM	1.50093	1.14579	1.18752	1.50695	1.31739	1.15337	2.16964	1.06464	1.71541	1.09862		1.16324	1.26971	1.21509	1.15001	1.68783	1.69832	1.20098	1.09128	1.24016	2.50077
