# Supplementary material for: UBR-1 deficiency leads to ivermectin resistance in Caenorhabditis elegans
Source: eLife journal article supplement (doi:10.7554/elife.103718), 2024-12-13
Supplement: data1 [file Figure 5-source data 7(H).xlsx]

## Sheet: Sheet1
WT+Glu 5-HT											WT+Glu 5-HT+IVM
1.05942	1.07559	1.33097	1.0968	1.01607	1.06049	1.02859	1.03353	1.07769	1.07972		1.10256	1.11123	1.01831	1.06395	1.49585	1.11774	1.09069	1.22901	1.11557	1.03944
1.02718	1.07503	1.33573	1.14315	1.02164	1.07199	1.03172	1.04592	1.06184	1.07411		1.08527	1.11159	1.0031	1.06046	1.48044	1.11443	1.0817	1.22362	1.13563	1.04714
1.04307	1.08158	1.32658	1.15034	1.01738	1.05431	1.0272	1.03756	1.05843	1.11267		1.1151	1.12425	1.00004	1.07506	1.48096	1.09693	1.0818	1.20911	1.10565	1.04825
1.06809	1.06714	1.32799	1.1275	1.02899	1.07894	1.03393	1.04854	1.07489	1.09221		1.12561	1.12936	1.00814	1.06225	1.43897	1.07369	1.08109	1.18349	1.08953	1.04376
1.06162	1.07811	1.32982	1.10377	1.02842	1.03727	1.02212	1.03459	1.0484	1.10771		1.09583	1.11606	1.00736	1.06021	1.4286	1.11803	1.06582	1.22317	1.10655	1.03921
1.07682	1.0597	1.32242	1.1759	1.02863	1.06811	1.03256	1.02656	1.07992	1.10853		1.11972	1.12444	1.02995	1.0689	1.45541	1.11948	1.04337	1.22469	1.11781	1.04184
1.0859	1.07227	1.31585	1.03024	1.0264	1.08758	1.02969	1.03849	1.05487	1.07322		1.11699	1.13047	1.02554	1.06688	1.44034	1.1028	1.03527	1.24359	1.08092	1.04415
1.06043	1.06867	1.32447	1.0731	1.02195	1.06148	1.01635	1.03596	1.08216	1.07658		1.08342	1.13553	1.03666	1.05996	1.44318	1.07949	1.05397	1.21793	1.09834	1.04323
1.07278	1.07532	1.33025	1.09884	1.02799	1.09079	1.03916	1.04543	1.0978	1.05706		1.09823	1.12523	1.03706	1.07842	1.43988	1.11074	1.06462	1.2292	1.09021	1.04726
1.02117	1.06004	1.33092	1.0305	1.0288	1.09365	1.02965	1.03624	1.07682	1.08287		1.0901	1.12825	1.03811	1.07418	1.42633	1.0703	1.04824	1.21738	1.09795	1.04677
1.04297	1.04904	1.33703	1.13721	1.03062	1.11117	1.03628	1.01849	1.0663	1.07062		1.12216	1.13542	1.02544	1.07807	1.42117	1.10409	1.06217	1.23215	1.08095	1.05399
1.04005	1.07319	1.33798	1.02822	1.02965	1.11158	1.03226	1.04071	1.07359	1.0985		1.08863	1.13444	1.04808	1.09725	1.46643	1.08492	1.08726	1.23713	1.09521	1.05563
1.02119	1.05855	1.35321	1.09939	1.0234	1.11091	1.02077	1.03751	1.07322	1.07091		1.10494	1.1446	1.05029	1.0834	1.47565	1.06267	1.07418	1.2068	1.11604	1.05903
1.02902	1.06599	1.33905	1.13812	1.0248	1.06685	1.03265	1.02944	1.08029	1.05658		1.10649	1.1481	1.04368	1.08334	1.47097	1.08722	1.08105	1.21579	1.14773	1.05597
1.03616	1.04815	1.34143	1.10771	1.02657	1.09954	1.03474	1.03134	1.09083	1.11296		1.12913	1.15113	1.0365	1.08893	1.4449	1.08795	1.05007	1.25277	1.13551	1.05572
1.03303	1.05664	1.34144	1.14888	1.02527	1.10787	1.02773	1.04326	1.1081	1.03897		1.086	1.14336	1.04446	1.0802	1.45209	1.10066	1.05077	1.22593	1.12961	1.04916
1.04291	1.06412	1.34392	1.18468	1.02478	1.06004	1.02523	1.03184	1.10059	1.09378		1.08309	1.1449	1.03151	1.08122	1.4506	1.06455	1.04551	1.19783	1.09962	1.05768
1.05823	1.05656	1.3208	1.17037	1.02756	1.05642	1.0344	1.03212	1.06927	1.10645		1.08914	1.14607	1.03812	1.09558	1.44545	1.06467	1.04402	1.23277	1.09671	1.05783
1.05409	1.06322	1.31832	1.18403	1.01907	1.0684	1.041	1.02462	1.06804	1.13961		1.08824	1.14893	1.05137	1.08272	1.43448	1.04781	1.04236	1.23777	1.09768	1.05142
1.05492	1.05177	1.33653	1.22039	1.02335	1.08092	1.04348	1.03984	1.06648	1.14512		1.08993	1.149	1.02737	1.08882	1.42544	1.07829	1.05235	1.21292	1.09678	1.05064
1.03276	1.0567	1.33515	1.14178	1.02491	1.08795	1.03372	1.03985	1.04914	1.11239		1.11351	1.14959	1.04532	1.08099	1.42449	1.07924	1.07231	1.24056	1.10078	1.04962
1.04428	1.04584	1.34293	1.12761	1.03087	1.09525	1.03555	1.02931	1.08944	1.14625		1.1092	1.15454	1.05377	1.08857	1.42489	1.09412	1.02635	1.20799	1.07507	1.0437
1.05618	1.07126	1.33522	1.14394	1.02553	1.06487	1.03896	1.02753	1.10245	1.12899		1.09285	1.14809	1.03613	1.07066	1.44672	1.09441	1.03502	1.20304	1.05128	1.04507
1.03854	1.06652	1.33752	1.18205	1.01861	1.06575	1.03235	1.01849	1.11761	1.11952		1.11611	1.13921	1.05699	1.08381	1.41837	1.1122	1.0485	1.22477	1.09821	1.04662
1.05972	1.07209	1.35868	1.13406	1.02264	1.05108	1.03612	1.03906	1.09173	1.13081		1.08046	1.14366	1.05583	1.08065	1.41278	1.09958	1.05652	1.20379	1.06145	1.04324
1.04435	1.05397	1.33491	1.16874	1.02818	1.092	1.04194	1.02748	1.05709	1.20303		1.09275	1.14505	1.05432	1.08767	1.39431	1.12593	1.0338	1.2167	1.06089	1.04516
1.07469	1.03578	1.34286	1.1295	1.02424	1.06933	1.04554	1.037	1.06481	1.14287		1.10163	1.15066	1.05107	1.09525	1.33762	1.106	1.05303	1.21519	1.04938	1.0459
1.04507	1.05557	1.34634	1.18106	1.02248	1.05432	1.0491	1.04683	1.06564	1.1017		1.08576	1.1467	1.04633	1.09714	1.44687	1.07532	1.03102	1.25732	1.06591	1.05111
1.05987	1.05857	1.33327	1.18509	1.0261	1.06685	1.04403	1.02117	1.09088	1.11226		1.0571	1.15209	1.04132	1.08679	1.44858	1.05221	1.04248	1.22009	1.09955	1.04272
1.03588	1.05067	1.32946	1.21837	1.02544	1.05638	1.04481	1.05233	1.06153	1.10043		1.04223	1.15202	1.05542	1.11155	1.40005	1.11343	1.03888	1.19284	1.07361	1.03433
1.0355	1.0507	1.34222	1.17069	1.02623	1.07059	1.04353	1.04706	1.06762	1.07215		1.07238	1.15516	1.04317	1.11518	1.42422	1.1084	1.02471	1.20008	1.10746	1.04202
1.0307	1.04097	1.33339	1.16319	1.02668	1.07674	1.03672	1.04641	1.09089	1.08725		1.04228	1.14915	1.04997	1.0814	1.40816	1.07531	1.02662	1.20576	1.11822	1.04399
1.05576	1.05596	1.33637	1.19948	1.02033	1.10124	1.03114	1.04511	1.06168	1.0668		1.10294	1.16267	1.04793	1.11119	1.42065	1.10859	1.05183	1.17958	1.14079	1.04439
1.05816	1.04742	1.35077	1.19688	1.02585	1.08061	1.03199	1.03236	1.06223	1.07022		1.11048	1.15645	1.04224	1.08857	1.43789	1.12765	1.02162	1.24981	1.12113	1.04802
1.04124	1.04977	1.33598	1.15741	1.01574	1.0773	1.04017	1.03598	1.08753	1.07275		1.07773	1.15678	1.04643	1.10981	1.42889	1.12543	1.0068	1.23284	1.1353	1.03467
1.04865	1.05798	1.33194	1.19486	1.02511	1.07112	1.04208	1.03389	1.05488	1.1191		1.07251	1.15695	1.04347	1.10614	1.40399	1.1158	1.03823	1.26542	1.13955	1.05446
1.05688	1.0314	1.34715	1.17973	1.02079	1.08708	1.03334	1.03996	1.0864	1.07271		1.0855	1.16429	1.04125	1.11676	1.43742	1.12414	1.06724	1.23918	1.14688	1.04645
1.04456	1.04506	1.33612	1.25621	1.01401	1.0791	1.0453	1.04583	1.06654	1.06742		1.10292	1.15806	1.0443	1.11723	1.44925	1.14244	1.06282	1.25815	1.14185	1.0413
1.03061	1.05353	1.31849	1.18955	1.03136	1.09888	1.04548	1.04157	1.09322	1.09254		1.09732	1.16144	1.04929	1.12263	1.43216	1.12323	1.05266	1.25295	1.15882	1.03804
1.04086	1.05675	1.33137	1.14879	1.027	1.06691	1.04422	1.03229	1.04732	1.11922		1.0924	1.15713	1.04392	1.11684	1.4296	1.07591	1.06741	1.2674	1.15876	1.04381
1.04274	1.04989	1.33575	1.22795	1.02349	1.1014	1.04909	1.03028	1.05787	1.13485		1.06142	1.17276	1.05782	1.13594	1.41475	1.103	1.069	1.29065	1.12025	1.03462
1.05604	1.05077	1.3312	1.23762	1.03109	1.07505	1.04914	1.06924	1.09441	1.08569		1.0923	1.185	1.06644	1.12881	1.42977	1.05479	1.04446	1.28008	1.16297	1.03723
1.0254	1.05488	1.33153	1.1508	1.02347	1.07742	1.04635	1.0777	1.07138	1.14027		1.05303	1.19404	1.0469	1.13047	1.4152	1.08046	1.0514	1.31061	1.16442	1.04301
1.0064	1.0549	1.32795	1.16233	1.02399	1.05522	1.05045	1.08162	1.05987	1.14013		1.07572	1.20782	1.04343	1.11787	1.36412	1.09139	1.05045	1.24907	1.15356	1.04643
1.03892	1.04732	1.33451	1.19856	1.02859	1.08144	1.05001	1.07752	1.0975	1.09746		1.10567	1.21389	1.04922	1.10293	1.45069	1.09399	1.05236	1.30214	1.15665	1.04837
1.04285	1.06455	1.32764	1.05651	1.02403	1.08059	1.03747	1.05747	1.0587	1.07848		1.10092	1.23357	1.04	1.09607	1.43265	1.1249	1.0482	1.29827	1.13734	1.04054
1.02834	1.05234	1.32561	1.22371	1.0196	1.07255	1.042	1.05203	1.07252	1.09502		1.06988	1.24985	1.05189	1.12185	1.48053	1.11331	1.06197	1.27542	1.12604	1.0334
1.03672	1.05476	1.32693	1.23765	1.02137	1.06925	1.0428	1.04921	1.09369	1.09261		1.07615	1.26253	1.04972	1.11826	1.44394	1.12544	1.07238	1.2512	1.10791	1.03671
1.03769	1.04456	1.31952	1.16355	1.02076	1.06109	1.04105	1.04706	1.0801	1.06961		1.10041	1.27499	1.04383	1.11694	1.48461	1.10578	1.08058	1.24773	1.10182	1.03177
1.02725	1.04571	1.32744	1.14647	1.02397	1.09063	1.03794	1.05009	1.07375	1.06801		1.12746	1.28018	1.04836	1.10616	1.44458	1.09189	1.10922	1.2334	1.06859	1.0389
1.04581	1.04149	1.31008	1.15762	1.02551	1.03858	1.04901	1.03865	1.06006	1.06177		1.09357	1.28409	1.04221	1.1219	1.46625	1.08752	1.09732	1.23949	1.09496	1.03903
1.02777	1.0475	1.31079	1.17389	1.02704	1.033	1.05283	1.03851	1.06666	1.06824		1.06645	1.29467	1.04022	1.09451	1.48643	1.05719	1.10351	1.23674	1.08766	1.0416
1.02495	1.05322	1.31832	1.20357	1.02608	1.07431	1.03949	1.0468	1.08317	1.10038		1.10144	1.2889	1.03425	1.11759	1.46937	1.09796	1.10882	1.21808	1.08711	1.02881
1.0399	1.03772	1.32633	1.14108	1.03092	1.10443	1.03559	1.04784	1.08213	1.06306		1.10315	1.2948	1.02349	1.09283	1.45532	1.10936	1.11619	1.23172	1.07744	1.04223
1.04738	1.06941	1.31515	1.21713	1.02048	1.11071	1.05103	1.03955	1.08117	1.07366		1.11028	1.29704	1.03751	1.12859	1.47245	1.06621	1.1404	1.2671	1.09987	1.03939
1.02385	1.0525	1.30632	1.23387	1.02472	1.09302	1.06054	1.03889	1.06331	1.06177		1.09427	1.28137	1.043	1.12017	1.42991	1.07784	1.12418	1.2754	1.09742	1.0381
1.0288	1.04592	1.30811	1.14397	1.02161	1.08567	1.04785	1.0439	1.10726	1.07481		1.13826	1.28987	1.03892	1.10267	1.45156	1.13221	1.10502	1.22771	1.08642	1.03203
1.03307	1.0446	1.30296	1.12103	1.02443	1.05669	1.05419	1.04022	1.07507	1.03515		1.1344	1.28142	1.03057	1.10023	1.41819	1.12842	1.11938	1.25384	1.06272	1.04162
1.01728	1.05355	1.307	1.04761	1.02643	1.0633	1.04858	1.04825	1.06985	1.03426		1.12987	1.27113	1.03572	1.10855	1.4355	1.11236	1.12734	1.23005	1.0845	1.03876
1	1.04605	1.29891	1.18317	1.02651	1.06245	1.03805	1.04347	1.14785	1.07441		1.0805	1.26981	1.03631	1.12449	1.4187	1.06825	1.10069	1.24198	1.06662	1.03626
1.0015	1.0454	1.31768	1.21964	1.02018	1.06699	1.04822	1.03884	1.13986	1.04158		1.10268	1.25815	1.02909	1.13022	1.45652	1.14037	1.08042	1.28726	1.05354	1.03636
1.04429	1.04715	1.27968	1.20119	1.03152	1.10322	1.03977	1.03558	1.08329	1.03861		1.11476	1.25619	1.03623	1.112	1.44162	1.11697	1.10861	1.25852	1.08267	1.03144
1.08835	1.05209	1.28644	1.20637	1.02622	1.07043	1.05115	1.05296	1.09574	1.07439		1.09546	1.24427	1.02129	1.13517	1.4793	1.11278	1.09337	1.26612	1.07851	1.03646
1.10771	1.05018	1.28727	1.21248	1.0259	1.07729	1.03834	1.03451	1.08485	1.02591		1.10352	1.2388	1.0319	1.1301	1.45469	1.11983	1.11596	1.2398	1.07293	1.03934
1.12682	1.03187	1.28414	1.2207	1.01871	1.0165	1.05254	1.0491	1.08561	1.00226		1.09506	1.23492	1.02777	1.1402	1.47355	1.10842	1.10978	1.21911	1.05674	1.03322
1.1284	1.04311	1.27594	1.25799	1.0236	1.06651	1.03615	1.04137	1.04381	1.02273		1.10151	1.21788	1.03259	1.1157	1.43202	1.07757	1.11106	1.20263	1.07946	1.03101
1.12469	1.03866	1.28234	1.21787	1.02003	1.0443	1.0352	1.0211	1.07247	1.02159		1.12292	1.22124	1.03249	1.10036	1.42573	1.09301	1.08535	1.27872	1.08429	1.04262
1.10824	1.03314	1.2855	1.31937	1.02666	1.08472	1.03905	1.06053	1.08941	1.04971		1.12797	1.20829	1.03244	1.10557	1.42134	1.14554	1.10179	1.25353	1.04542	1.03194
1.10423	1.05431	1.28453	1.44446	1.02819	1.03482	1.0436	1.04701	1.0712	1.03265		1.13861	1.20208	1.02834	1.12314	1.46296	1.10687	1.11126	1.23983	1.0852	1.02773
1.11325	1.04395	1.27018	1.41652	1.02403	1.06525	1.05716	1.06459	1.11589	1.02583		1.09597	1.19932	1.02463	1.11679	1.48944	1.06421	1.08939	1.24429	1.07611	1.01977
1.08508	1.05316	1.26488	1.28925	1.0257	1.071	1.0581	1.0715	1.08463	1.01856		1.08397	1.19094	1.0224	1.13635	1.47775	1.08649	1.10247	1.23692	1.06872	1.02742
1.0775	1.0525	1.28173	1.40986	1.0208	1.06813	1.04664	1.08823	1.07143	1.0325		1.09532	1.18405	1.02265	1.12434	1.49127	1.0665	1.09118	1.2454	1.05985	1.02975
1.07059	1.04836	1.28107	1.44949	1.02467	1.06157	1.04991	1.0708	1.06951	1.02323		1.1091	1.1738	1.01763	1.1359	1.48821	1.07134	1.09051	1.2467	1.08575	1.03636
1.08387	1.02823	1.2677	1.36486	1.02569	1.08544	1.05218	1.0515	1.09691	1.03304		1.11253	1.16947	1.01994	1.12901	1.4327	1.03848	1.09602	1.23229	1.12409	1.03488
1.07775	1.0503	1.24137	1.3133	1.02544	1.05963	1.05365	1.04581	1.03005	1.03177		1.10697	1.16919	1.01741	1.10716	1.4143	1.08123	1.10166	1.21122	1.12903	1.02516
1.08095	1.04449	1.26476	1.40797	1.02667	1.09521	1.06177	1.07092	1.07329	1.06377		1.12504	1.16155	1.02137	1.13018	1.45281	1.07912	1.06483	1.25734	1.1162	1.03188
1.08928	1.04984	1.26999	1.37257	1.03196	1.08229	1.06393	1.06138	1.09205	1.05267		1.12424	1.16001	1.01348	1.11764	1.43918	1.05898	1.08461	1.25296	1.08718	1.04459
1.06802	1.04437	1.27069	1.33499	1.02838	1.07459	1.06071	1.05919	1.09658	1.04208		1.11893	1.15417	1.00104	1.11428	1.41033	1.09609	1.07609	1.25178	1.07573	1.0346
1.07171	1.05267	1.24053	1.36009	1.01809	1.08442	1.04835	1.05689	1.13292	1.05641		1.10594	1.15404	1	1.11735	1.40023	1.12039	1.06369	1.20595	1.09657	1.03572
1.06234	1.03544	1.24118	1.38563	1.02313	1.08328	1.05126	1.05245	1.13026	1.08487		1.12088	1.14639	1.01405	1.11722	1.40896	1.08971	1.07452	1.30374	1.11383	1.02826
1.04967	1.04839	1.25091	1.27348	1.03696	1.07149	1.05729	1.05022	1.1176	1.05177		1.12947	1.14392	1.01142	1.09417	1.41131	1.12691	1.05951	1.26039	1.07642	1.03984
1.05441	1.0499	1.23831	1.32927	1.0343	1.0668	1.06379	1.03927	1.0904	1.05488		1.10193	1.14326	1.01467	1.13441	1.46213	1.08386	1.0432	1.27873	1.08912	1.03853
1.07067	1.04269	1.22062	1.37346	1.02783	1.03452	1.04763	1.03932	1.0741	1.11514		1.08183	1.13807	1.01859	1.12217	1.46969	1.09893	1.05245	1.28521	1.08073	1.03666
1.07642	1.04467	1.24086	1.3724	1.03077	1.06592	1.05849	1.04174	1.09246	1.14657		1.11354	1.1428	1.01546	1.11241	1.44858	1.11549	1.07088	1.26874	1.09118	1.03645
1.05985	1.04988	1.23996	1.31313	1.03397	1.0517	1.06822	1.02726	1.10758	1.09252		1.11908	1.14151	1.0232	1.1037	1.49054	1.08303	1.05342	1.29621	1.10998	1.03271
1.08363	1.047	1.21694	1.36678	1.0271	1.06594	1.05936	1.05803	1.12235	1.10258		1.13676	1.13397	1.0211	1.11218	1.44901	1.1402	1.0458	1.28522	1.12805	1.01932
1.05104	1.02158	1.22582	1.37219	1.03444	1.09008	1.06241	1.04553	1.07615	1.11327		1.11034	1.13289	1.02446	1.13268	1.48102	1.13679	1.07637	1.27015	1.11771	1.02833
1.07497	1.04515	1.22434	1.28109	1.02824	1.09719	1.06713	1.03124	1.06682	1.05058		1.11875	1.13732	1.02066	1.13477	1.50998	1.09446	1.08802	1.23176	1.13191	1.0339
1.0879	1.04377	1.23902	1.36838	1.02901	1.04092	1.05331	1.03696	1.06138	1.11351		1.09439	1.13989	1.01561	1.13609	1.46101	1.12005	1.08365	1.21931	1.11432	1.02806
1.08338	1.0541	1.19986	1.32918	1.0292	1.03491	1.05373	1.04583	1.03474	1.0232		1.08499	1.13783	1.013	1.09576	1.46103	1.0428	1.11375	1.23702	1.10377	1.03777
1.08238	1.05425	1.22315	1.36022	1.0316	1.05688	1.04623	1.0455	1.06	1.01836		1.11324	1.14546	1.02916	1.12035	1.50389	1.10035	1.09716	1.25943	1.05916	1.04374
1.06779	1.05574	1.22498	1.31505	1.02501	1.03477	1.06293	1.03039	1.03094	1.07243		1.1026	1.13782	1.01395	1.1198	1.4941	1.10866	1.0739	1.25263	1.0855	1.03502
1.04763	1.04146	1.22215	1.37379	1.03021	1.06801	1.05474	1.04108	1.01293	1		1.11559	1.14563	1.02859	1.12511	1.52903	1.09177	1.10017	1.23162	1.06513	1.04482
1.08082	1.02886	1.21654	1.32083	1.0316	1.0756	1.05622	1.04156	1.0602	1.01505		1.12184	1.15165	1.01511	1.11823	1.48285	1.08493	1.09026	1.26815	1.08295	1.02753
1.07211	1.05156	1.19513	1.33683	1.03596	1.07699	1.06031	1.06024	1.06415	1.0565		1.12756	1.15164	1.02133	1.12702	1.51739	1.09002	1.09044	1.22743	1.09697	1.02932
1.07019	1.04494	1.18837	1.36173	1.0212	1.08196	1.0615	1.05492	1.0329	1.03594		1.08779	1.15739	1.01477	1.10654	1.51117	1.10921	1.08417	1.25456	1.10692	1.03481
1.07073	1.02604	1.20152	1.39176	1.02811	1.06206	1.0693	1.05149	1.07675	1.04605		1.08695	1.15446	1.02475	1.12026	1.50393	1.10471	1.09093	1.2804	1.06866	1.03981
1.07985	1.04265	1.1771	1.38979	1.03375	1.084	1.07041	1.05173	1.05116	1.07829		1.13094	1.15822	1.00619	1.10659	1.46515	1.10094	1.09631	1.23109	1.04586	1.03207
1.08862	1.02761	1.18566	1.41139	1.03128	1.05475	1.0576	1.03414	1.05933	1.07486		1.11574	1.158	1.0248	1.12195	1.43137	1.13142	1.07364	1.23627	1.07885	1.03664
1.1199	1.03758	1.17567	1.46586	1.02887	1.07246	1.07099	1.04958	1.02696	1.11256		1.09475	1.1508	1.0166	1.12	1.45063	1.07137	1.05787	1.28045	1.03716	1.03436
1.10567	1.05107	1.21505	1.39044	1.0328	1.09176	1.06111	1.054	1.0418	1.13408		1.08229	1.14192	1.02108	1.10822	1.42698	1.04896	1.08594	1.24455	1.05939	1.04859
1.10295	1.02639	1.18466	1.27315	1.02529	1.09943	1.0639	1.04068	1.05475	1.07917		1.12095	1.14458	1.02695	1.11402	1.38803	1.0895	1.09052	1.22683	1.06935	1.03643
1.07129	1.03079	1.18546	1.36436	1.01894	1.08677	1.0526	1.05668	1.03791	1.12755		1.13056	1.14807	1.01578	1.10612	1.42433	1.09434	1.11147	1.27116	1.03291	1.04176
1.07751	1.0395	1.16931	1.45233	1.02265	1.08157	1.05602	1.04208	1.02187	1.10827		1.1245	1.15254	1.02203	1.10009	1.45424	1.07024	1.09766	1.28937	1.0366	1.04561
1.07722	1.04289	1.18318	1.28137	1.03082	1.05313	1.05567	1.05555	1.03977	1.04812		1.12324	1.14782	1.02748	1.11247	1.40872	1.15762	1.10865	1.23429	1.05629	1.04579
1.05336	1.04964	1.19158	1.26948	1.0292	1.06819	1.0594	1.04933	1.0114	1.10219		1.11412	1.14061	1.02036	1.11698	1.42369	1.16435	1.11271	1.28679	1.09171	1.04324
1.06169	1.05022	1.16753	1.35137	1.03003	1.08339	1.06415	1.04609	1.01935	1.09125		1.10907	1.15327	1.02454	1.11425	1.40383	1.13592	1.10346	1.29568	1.0864	1.03724
1.0712	1.04484	1.16538	1.36295	1.02586	1.05476	1.06034	1.0668	1.03654	1.08505		1.11495	1.14331	1.02457	1.11095	1.44452	1.1162	1.11422	1.28415	1.09441	1.04831
1.07113	1.03526	1.19415	1.30578	1.02401	1.08074	1.06069	1.05113	1.04975	1.09112		1.12086	1.14857	1.01843	1.11103	1.43204	1.1395	1.09049	1.28859	1.04489	1.04608
1.08059	1.06059	1.19267	1.38261	1.02365	1.05027	1.06793	1.05171	1.0295	1.03647		1.12893	1.14802	1.03121	1.09597	1.4319	1.14129	1.07962	1.30271	1.08814	1.03787
1.10212	1.04179	1.15923	1.34386	1.02435	1.08023	1.06835	1.05176	1.03422	1.03688		1.11921	1.15346	1.01457	1.12665	1.42693	1.154	1.10531	1.30309	1.11098	1.03288
1.07089	1.02469	1.1507	1.27029	1.03088	1.04749	1.05538	1.04297	1.03825	1.07883		1.07923	1.15802	1.01845	1.12118	1.42	1.122	1.08403	1.29624	1.12634	1.02894
1.05368	1.03261	1.1526	1.33871	1.02654	1.09067	1.06409	1.0387	1.01087	1.0375		1.07879	1.15601	1.01615	1.10423	1.44062	1.09482	1.08895	1.29492	1.08013	1.04366
1.06217	1.05061	1.15445	1.36871	1.0318	1.06991	1.06219	1.0336	1.05731	1.05292		1.11285	1.14939	1.01707	1.1256	1.43387	1.1546	1.07381	1.28731	1.08196	1.04076
1.06455	1.0483	1.14301	1.35794	1.03963	1.04165	1.07765	1.05516	1.03374	1.05105		1.07384	1.15649	1.0095	1.1181	1.39997	1.15298	1.07367	1.25547	1.11029	1.03248
1.06071	1.04251	1.17726	1.39191	1.02206	1.07484	1.06478	1.0316	1.04456	1.0784		1.09685	1.16094	1.0195	1.12746	1.39508	1.16341	1.08466	1.25793	1.1029	1.04267
1.06973	1.03899	1.14355	1.40837	1.0322	1.09215	1.06899	1.05776	1.04031	1.02913		1.09201	1.15836	1.02422	1.1236	1.39525	1.12093	1.06514	1.25361	1.13672	1.043
1.08216	1.05898	1.14821	1.36687	1.03343	1.10207	1.07766	1.04852	1.05178	1.04438		1.11589	1.16621	1.02391	1.1175	1.42413	1.15507	1.07133	1.25743	1.13548	1.04262
1.09558	1.06295	1.11478	1.33657	1.03194	1.0798	1.0675	1.04146	1.02691	1.04736		1.10995	1.16959	1.0187	1.11112	1.40005	1.18956	1.07653	1.26654	1.1443	1.04022
1.09991	1.05846	1.11856	1.36018	1.0285	1.07385	1.06241	1.05618	1.0477	1.08181		1.06946	1.15936	1.03659	1.10659	1.43743	1.23422	1.08238	1.26672	1.12744	1.04009
1.09561	1.0562	1.17214	1.36039	1.03618	1.05045	1.06831	1.05362	1.05788	1.01166		1.12387	1.15977	1.02165	1.10223	1.39762	1.28476	1.05181	1.26308	1.12333	1.03742
1.07593	1.03757	1.14552	1.40057	1.03587	1.04265	1.0635	1.0502	1.0277	1.05104		1.12024	1.16809	1.02436	1.12522	1.44188	1.27857	1.05448	1.26723	1.14071	1.0404
1.07515	1.04295	1.14347	1.4318	1.03473	1.0546	1.04964	1.0492	1.03962	1.02		1.05199	1.17046	1.02842	1.10863	1.47781	1.23225	1.08136	1.25514	1.0893	1.04491
1.07054	1.02755	1.13231	1.38128	1.02462	1.0403	1.0535	1.06212	1.04597	1.02854		1.05197	1.17576	1.02555	1.11906	1.46413	1.20881	1.08951	1.29191	1.1289	1.04902
1.07162	1.04351	1.13372	1.34019	1.03084	1.08129	1.07221	1.07071	1.05041	1.02317		1.08705	1.16602	1.02809	1.11484	1.44844	1.21136	1.07553	1.26311	1.0792	1.03982
1.08648	1.03591	1.14615	1.38716	1.03497	1.03357	1.06579	1.08647	1.04028	1.03011		1.11792	1.18061	1.02665	1.12942	1.41625	1.23506	1.08633	1.30208	1.06725	1.04028
1.08671	1.03977	1.14451	1.40728	1.03355	1.04816	1.07063	1.07939	1.03452	1.043		1.07185	1.16627	1.02237	1.12769	1.46697	1.2477	1.08012	1.26485	1.09885	1.03061
1.0853	1.0375	1.14363	1.37413	1.02988	1.05122	1.08298	1.09188	1.04232	1.03506		1.0576	1.18009	1.02767	1.1054	1.46445	1.22649	1.03664	1.30736	1.05748	1.03629
1.0888	1.03554	1.12842	1.34801	1.0358	1.04472	1.06742	1.07346	1.061	1.04684		1.10106	1.1922	1.03254	1.09951	1.39879	1.26409	1.0649	1.26545	1.06071	1.03798
1.07804	1.04341	1.14628	1.3952	1.03864	1.09288	1.06542	1.06208	1.02155	1.07698		1.08437	1.18973	1.02724	1.10721	1.45127	1.27751	1.04852	1.2253	1.08274	1.03574
1.06793	1.06014	1.12231	1.38216	1.0277	1.05106	1.06857	1.04487	1.00844	1.02558		1.08355	1.20038	1.02966	1.11308	1.39363	1.2983	1.04909	1.19078	1.05128	1.02621
1.06429	1.0397	1.13417	1.41552	1.03355	1.08891	1.06435	1.04886	1.03977	1.05167		1.07525	1.20372	1.02497	1.13519	1.39952	1.25151	1.0564	1.2759	1.08573	1.04009
1.07824	1.04284	1.11804	1.39207	1.03442	1.08026	1.07505	1.0615	1.01205	1.08158		1.08473	1.20735	1.03783	1.09106	1.45862	1.25961	1.05522	1.25575	1.04699	1.03557
1.07076	1.03027	1.12583	1.40577	1.03166	1.08172	1.06863	1.04902	1.04878	1.06903		1.07935	1.21108	1.03512	1.12706	1.4095	1.28211	1.08766	1.24701	1.05185	1.03317
1.05535	1.04654	1.10403	1.35724	1.03483	1.07955	1.08996	1.04207	1.0113	1.06341		1.04958	1.21604	1.04088	1.11034	1.45354	1.29242	1.09208	1.2527	1.07661	1.03595
1.04602	1.04264	1.12601	1.44289	1.04042	1.07048	1.07855	1.06543	1.0364	1.08663		1.10239	1.23401	1.02854	1.10882	1.41253	1.33073	1.07776	1.26663	1.08694	1.03269
1.06133	1.04901	1.12705	1.45166	1.03948	1.06957	1.07349	1.0534	1.04863	1.05529		1.08147	1.24548	1.03836	1.12186	1.42439	1.37078	1.08363	1.23346	1.06842	1.03136
1.0536	1.04897	1.10204	1.4384	1.04083	1.06877	1.07661	1.06034	1.02729	1.11596		1.05455	1.24732	1.03387	1.12184	1.40122	1.36575	1.09264	1.23958	1.0803	1.03141
1.06426	1.05132	1.11098	1.43298	1.03482	1.08515	1.07746	1.05335	1.01477	1.05726		1.06743	1.25688	1.02939	1.12578	1.38858	1.46491	1.09234	1.30063	1.06223	1.0265
1.07278	1.04653	1.10728	1.49257	1.03555	1.09006	1.08738	1.05907	1.08778	1.09967		1.09507	1.27326	1.02762	1.12006	1.36934	1.55898	1.0999	1.26289	1.07291	1.03054
1.08491	1.04005	1.13779	1.44874	1.03303	1.05093	1.09689	1.04335	1.02377	1.06904		1.06948	1.28223	1.03293	1.10064	1.42623	1.58061	1.07454	1.21551	1.06895	1.03056
1.1103	1.04573	1.12533	1.46635	1.03525	1.09067	1.08614	1.06702	1.03825	1.19963		1.05486	1.2897	1.02798	1.09609	1.42202	1.66836	1.08841	1.24019	1.05115	1.04433
1.12673	1.05531	1.14521	1.45724	1.03389	1.09919	1.07745	1.05216	1.02329	1.20115		1.0746	1.30194	1.03541	1.11379	1.40941	1.65913	1.11955	1.19073	1.09574	1.02752
1.1508	1.04756	1.09974	1.47371	1.03397	1.08674	1.08575	1.03397	1.05378	1.11626		1.04574	1.29546	1.03579	1.11249	1.35818	1.58968	1.1075	1.22162	1.07383	1.04541
1.18752	1.04401	1.12284	1.51428	1.03716	1.07638	1.07847	1.05333	1.06025	1.09462		1.06343	1.31146	1.03421	1.10439	1.38943	1.51254	1.10141	1.23095	1.07899	1.037
1.1963	1.05356	1.11496	1.49649	1.0437	1.0886	1.07841	1.05301	1.06399	1.04658		1.05379	1.36675	1.03171	1.09929	1.38702	1.47636	1.10758	1.22011	1.06465	1.0198
1.17979	1.03111	1.1098	1.51734	1.03329	1.10575	1.08561	1.05645	1.0366	1.05486		1.05094	1.39001	1.03185	1.10617	1.39637	1.3888	1.0841	1.20486	1.07401	1.0297
1.1543	1.03974	1.11526	1.45795	1.03499	1.09863	1.06659	1.06425	1.03036	1.05721		1.08142	1.40549	1.03881	1.11934	1.37529	1.38018	1.11881	1.23314	1.05368	1.03912
1.14287	1.04724	1.11635	1.46806	1.03626	1.10352	1.05434	1.0651	1.03948	1.06275		1.07126	1.41886	1.03678	1.09775	1.42752	1.2837	1.10391	1.21884	1.07009	1.03723
1.11021	1.04066	1.08345	1.44868	1.03189	1.1025	1.05244	1.05601	1.08321	1.07836		1.06483	1.43011	1.03167	1.10185	1.41704	1.31295	1.12421	1.20964	1.0482	1.03246
1.14462	1.0396	1.09859	1.46562	1.028	1.08655	1.05049	1.05469	1.06211	1.10157		1.04938	1.43488	1.03906	1.09218	1.43817	1.26982	1.12104	1.2531	1.05821	1.03984
1.13754	1.05216	1.10354	1.47755	1.03007	1.0828	1.05109	1.04183	1.01987	1.07413		1.04348	1.43098	1.03428	1.10613	1.41929	1.26856	1.10397	1.2329	1.04915	1.02992
1.11477	1.06037	1.1182	1.42439	1.03621	1.09742	1.04336	1.05846	1.01845	1.11041		1.0585	1.43159	1.03866	1.08886	1.46017	1.2528	1.10826	1.22018	1.03591	1.03259
1.10502	1.05032	1.10603	1.41769	1.02945	1.0669	1.04485	1.05629	1.07476	1.07427		1.05781	1.44849	1.03106	1.07689	1.45517	1.25214	1.09841	1.23112	1.01887	1.03056
1.11259	1.04107	1.13341	1.45183	1.03875	1.0633	1.04115	1.06559	1.01303	1.06954		1.05132	1.45283	1.04008	1.10262	1.40893	1.2773	1.11874	1.31298	1.04092	1.04111
1.12863	1.01237	1.10443	1.4324	1.03662	1.03856	1.04762	1.05298	1.02781	1.08305		1.07358	1.47007	1.04134	1.09235	1.42851	1.25179	1.09664	1.27053	1.09538	1.05118
1.11177	1.04897	1.12326	1.48036	1.03476	1.09188	1.03637	1.05855	1.0267	1.12469		1.07331	1.46506	1.03541	1.09684	1.3858	1.2272	1.09781	1.2655	1.05194	1.03754
1.10261	1.03993	1.1178	1.4103	1.04899	1.07492	1.03887	1.06138	1.04527	1.1031		1.06405	1.47898	1.03946	1.08619	1.41331	1.25339	1.09215	1.29412	1.04665	1.04057
1.0891	1.04923	1.0983	1.4152	1.04404	1.05169	1.03629	1.06045	1.04155	1.08922		1.02535	1.4852	1.02568	1.06959	1.46256	1.2401	1.07868	1.26178	1.04717	1.04372
1.09738	1.03569	1.10752	1.4313	1.03925	1.05326	1.03557	1.06826	1.04896	1.0784		1.02417	1.47578	1.03641	1.09014	1.42332	1.27576	1.05786	1.27995	1.07304	1.0323
1.11042	1.04949	1.11114	1.4723	1.04462	1.06359	1.04903	1.0646	1.04914	1.13766		1.02803	1.47902	1.03071	1.05872	1.45334	1.23785	1.06256	1.29422	1.06017	1.04286
1.0842	1.0398	1.10061	1.42313	1.04052	1.08101	1.05328	1.06779	1.04087	1.15033		1.03604	1.48238	1.03733	1.08604	1.45257	1.22623	1.08013	1.25054	1.07109	1.04654
1.10241	1.022	1.1507	1.44842	1.04903	1.09138	1.04833	1.04184	1.03293	1.17476		1.02407	1.4761	1.03946	1.09741	1.42735	1.19585	1.09528	1.24249	1.06903	1.04263
1.09884	1.04421	1.10397	1.48194	1.03681	1.09994	1.04644	1.04636	1.00831	1.13047		1.03455	1.4518	1.04639	1.08826	1.44643	1.16599	1.0944	1.24267	1.05573	1.04672
1.10093	1.04059	1.1323	1.465	1.04038	1.09802	1.03992	1.05859	1.03068	1.14955		1.05751	1.45582	1.0392	1.08069	1.44279	1.16637	1.08312	1.24022	1.05805	1.04627
1.09014	1.04778	1.12983	1.43768	1.03669	1.12118	1.0384	1.05539	1.02598	1.10722		1.04915	1.45269	1.048	1.08787	1.45472	1.18606	1.088	1.2939	1.06494	1.03875
1.07877	1.04605	1.10209	1.42567	1.03314	1.12806	1.03972	1.05422	1.02364	1.10248		1.04633	1.43552	1.03622	1.07272	1.45837	1.20497	1.09426	1.30113	1.06007	1.04037
1.07968	1.04061	1.11803	1.45053	1.04183	1.0971	1.03497	1.06551	1.04485	1.07843		1.06316	1.42939	1.03096	1.09553	1.4631	1.47757	1.07377	1.31185	1.0172	1.03272
1.0735	1.04749	1.09558	1.48535	1.04989	1.08087	1.03583	1.07436	1.0702	1.10787		1.03805	1.41867	1.03743	1.07584	1.48503	1.74181	1.11395	1.33508	1.03604	1.04594
1.09445	1.20166	1.10519	1.43121	1.05129	1.07353	1.04682	1.04743	1.0329	1.13737		1.03958	1.40877	1.0337	1.08061	1.45544	1.80102	1.09043	1.32831	1.05669	1.04674
1.08038	2.60665	1.11714	1.38613	1.04706	1.09575	1.04269	1.06922	1.05291	1.09865		1.03913	1.39939	1.04454	1.06983	1.48213	1.72821	1.09164	1.32788	1.06119	1.04064
1.09643	2.55653	1.08542	1.4734	1.04316	1.04376	1.03482	1.05667	1.07114	1.10435		1.0337	1.38692	1.03454	1.08851	1.41509	1.64387	1.09604	1.35327	1.04973	1.05027
1.08343	2.17853	1.10641	1.43307	1.03315	1.09003	1.03063	1.06645	1.0803	1.08201		1.04323	1.37956	1.03937	1.07953	1.42826	1.58519	1.09256	1.34091	1.09109	1.02677
1.09567	1.87403	1.10596	1.40646	1.03259	1.09682	1.03251	1.05397	1.03322	1.15859		1.02049	1.3652	1.05124	1.07498	1.38297	1.4833	1.10447	1.3346	1.09681	1.03239
1.10409	1.66602	1.05615	1.44725	1.03452	1.07699	1.0229	1.0547	1.05155	1.0665		1.00602	1.35957	1.0339	1.08901	1.42147	1.43637	1.07747	1.32244	1.07609	1.04123
1.10958	1.49917	1.09788	1.47239	1.04231	1.0706	1.03172	1.05848	1.05159	1.07104		1.01377	1.34021	1.04184	1.09235	1.3974	1.3919	1.10311	1.35307	1.08037	1.04099
1.11849	1.41037	1.11453	1.4777	1.03911	1.06304	1.03525	1.06123	1.04013	1.07794		1.03104	1.34166	1.03626	1.06497	1.4528	1.37854	1.08251	1.36006	1.07907	1.0303
1.10726	1.32652	1.11568	1.4141	1.04564	1.05215	1.04248	1.06715	1.06761	1.1706		1	1.32452	1.03996	1.08641	1.36104	1.3054	1.06781	1.33381	1.03088	1.03412
1.09021	1.27685	1.09219	1.51722	1.03736	1.08712	1.03617	1.05494	1.05582	1.13445		1.04293	1.31838	1.0422	1.07302	1.37885	1.31457	1.07662	1.33731	1.05366	1.04146
1.06177	1.2285	1.11554	1.43239	1.03185	1.03989	1.04526	1.05419	1.05936	1.11855		1.06028	1.31513	1.04872	1.09804	1.43947	1.28128	1.06945	1.32883	1.02836	1.03726
1.0986	1.18098	1.09296	1.50613	1.03402	1.05615	1.04302	1.05163	1.00959	1.08493		1.02028	1.29595	1.04842	1.08137	1.40909	1.24834	1.06766	1.30757	1.04885	1.03173
1.08769	1.15724	1.09293	1.48274	1.0336	1.0707	1.02172	1.05792	1.05849	1.14637		1.07355	1.30463	1.04222	1.0807	1.39991	1.23237	1.08103	1.31124	1.06112	1.03717
1.0616	1.14533	1.09092	1.40345	1.03342	1.07172	1.033	1.0739	1.04005	1.17531		1.02362	1.31167	1.0316	1.08479	1.43368	1.23968	1.09266	1.32083	1.0708	1.02681
1.07097	1.13448	1.11952	1.45069	1.04149	1.02766	1.03475	1.05342	1.02224	1.15755		1.03743	1.29392	1.04185	1.09518	1.39604	1.23019	1.06647	1.29142	1.07802	1.04142
1.10398	1.12121	1.11025	1.49141	1.04494	1.05823	1.04075	1.06313	1.04324	1.1593		1.04286	1.30974	1.05557	1.10076	1.40978	1.25521	1.07381	1.29351	1.05433	1.03337
1.07412	1.12155	1.10487	1.47284	1.04528	1.06037	1.05072	1.05828	1.04192	1.18163		1.05049	1.30471	1.05053	1.09669	1.41369	1.25208	1.06503	1.30178	1.06646	1.03911
1.06988	1.1201	1.09328	1.45944	1.03563	1.05501	1.0384	1.06914	1.07927	1.14321		1.0577	1.31105	1.04632	1.08338	1.39594	1.23225	1.08232	1.27007	1.07349	1.03615
1.06703	1.07744	1.11129	1.44362	1.03903	1.04827	1.0387	1.06339	1.04878	1.112		1.04832	1.29996	1.04525	1.07465	1.40978	1.20435	1.07993	1.28787	1.09063	1.04441
1.07685	1.1124	1.08659	1.49874	1.03529	1.06441	1.01764	1.06147	1.07163	1.09232		1.06888	1.30687	1.0462	1.09342	1.43762	1.19121	1.0873	1.26979	1.12213	1.03451
1.10761	1.08711	1.11346	1.44544	1.03698	1.04348	1.03177	1.06464	1.07709	1.15291		1.07947	1.30271	1.03437	1.10211	1.42439	1.17441	1.10883	1.29967	1.13264	1.0384
1.06579	1.10649	1.0941	1.49836	1.03759	1.06459	1.02167	1.06309	1.04634	1.14364		1.05588	1.30367	1.03986	1.08982	1.43223	1.18379	1.06849	1.30255	1.13368	1.03916
1.0881	1.09383	1.10086	1.43697	1.02935	1.06927	1.02325	1.05804	1.0262	1.16343		1.04547	1.30363	1.02493	1.0887	1.4231	1.14789	1.08177	1.29979	1.10033	1.03802
1.1017	1.09747	1.1124	1.51919	1.02557	1.03616	1.02491	1.05992	1.04271	1.09477		1.00823	1.32258	1.03797	1.07898	1.40271	1.13499	1.08937	1.28766	1.11545	1.03502
1.10889	1.09445	1.10386	1.48742	1.03331	1.03811	1.02987	1.05972	1.05544	1.12795		1.03976	1.32371	1.04768	1.0888	1.40962	1.13373	1.10546	1.3077	1.1278	1.03593
1.09611	1.0859	1.0871	1.4872	1.02237	1.04818	1.03007	1.06049	1.05816	1.09601		1.06997	1.34426	1.04841	1.10194	1.35144	1.14379	1.08236	1.29308	1.09068	1.04483
1.09004	1.09601	1.07644	1.46437	1.03044	1.03865	1.02876	1.0521	1.02742	1.10885		1.05556	1.35768	1.04711	1.10282	1.37474	1.13047	1.0929	1.28885	1.09865	1.05671
1.09143	1.09071	1.15782	1.51004	1.02569	1.07285	1.03236	1.06714	1.05379	1.09756		1.06213	1.37073	1.04925	1.09601	1.39627	1.14291	1.09366	1.34046	1.07643	1.04374
1.12172	1.07406	1.0842	1.49061	1.01899	1.05256	1.03979	1.06385	1.04173	1.10822		1.04408	1.38878	1.05142	1.11576	1.41617	1.12713	1.08461	1.2852	1.06195	1.04136
1.09026	1.08687	1.0876	1.46289	1.01884	1.08272	1.03883	1.06363	1.03399	1.10548		1.06407	1.38777	1.04374	1.10362	1.4003	1.14319	1.08926	1.27815	1.11629	1.04683
1.09684	1.08684	1.1154	1.48784	1.01795	1.05193	1.0306	1.06029	1.05031	1.12578		1.06534	1.4057	1.03611	1.11198	1.42537	1.16172	1.10465	1.25332	1.10438	1.03754
1.08121	1.08294	1.12605	1.51642	1.02247	1.03858	1.02488	1.07038	1.05373	1.09776		1.04919	1.42349	1.0561	1.10559	1.43213	1.1317	1.14199	1.23267	1.11171	1.04549
1.09839	1.0708	1.1255	1.44863	1.02776	1.05415	1.01527	1.07184	1.06456	1.08907		1.02706	1.44213	1.04748	1.1035	1.45478	1.15362	1.1376	1.28529	1.13562	1.05089
1.06831	1.07814	1.10291	1.53105	1.01674	1.0465	1.03152	1.07039	1.05877	1.10669		1.0127	1.4406	1.04828	1.09445	1.42077	1.15756	1.13624	1.28585	1.15917	1.03426
1.1116	1.09408	1.10119	1.45944	1.0184	1.05491	1.04189	1.06289	1.05411	1.08393		1.05516	1.45922	1.04246	1.12402	1.47443	1.13202	1.15038	1.26657	1.10538	1.03788
1.09712	1.08538	1.10581	1.51717	1.02101	1.03298	1.01781	1.0706	1.05638	1.0595		1.04368	1.47343	1.04722	1.1083	1.43795	1.10422	1.15128	1.28115	1.09963	1.04321
1.07052	1.08796	1.11742	1.50517	1.02276	1.0567	1.02808	1.09548	1.08509	1.05653		1.02239	1.46961	1.04488	1.11117	1.44697	1.14522	1.1364	1.32825	1.07648	1.04595
1.05056	1.08544	1.09088	1.50338	1.019	1.06725	1.0276	1.1053	1.06691	1.07903		1.05394	1.46827	1.05082	1.10341	1.42381	1.14441	1.15877	1.31109	1.11014	1.04715
1.08668	1.08198	1.11876	1.42451	1.02375	1.0734	1.02131	1.09722	1.06444	1.09496		1.06527	1.46438	1.03584	1.10448	1.41682	1.15587	1.13657	1.31594	1.11126	1.03046
1.08991	1.08858	1.09046	1.52442	1.01238	1.06943	1.02694	1.09878	1.07088	1.1292		1.05613	1.45658	1.04574	1.11543	1.40151	1.12427	1.15282	1.28533	1.0996	1.04818
1.085	1.07626	1.10023	1.42368	1.02824	1.07294	1.03481	1.09332	1.06127	1.10702		1.07359	1.4414	1.0343	1.11742	1.42507	1.12676	1.14485	1.30105	1.08019	1.04379
1.11978	1.06664	1.0876	1.51069	1.01684	1.03481	1.02537	1.07728	1.05838	1.08814		1.05721	1.44034	1.03649	1.10877	1.43524	1.11582	1.12193	1.31212	1.02937	1.04436
1.11578	1.08244	1.08921	1.47787	1.03432	1.03908	1.03211	1.06229	1.03749	1.12519		1.03579	1.43365	1.04103	1.10874	1.38014	1.11671	1.14276	1.28523	1.07123	1.04465
1.09917	1.08524	1.12037	1.49462	1.02608	1.04334	1.03548	1.0898	1.05247	1.09724		1.08751	1.41274	1.0413	1.10669	1.40508	1.1367	1.14005	1.31589	1.08703	1.04174
1.10115	1.0885	1.08118	1.47034	1.02257	1.08137	1.0279	1.07553	1.06522	1.10259		1.07059	1.40483	1.03884	1.10061	1.40147	1.07436	1.11912	1.31616	1.07567	1.03768
1.10038	1.08329	1.12207	1.49303	1.02181	1.03493	1.02116	1.06956	1.05029	1.09077		1.08112	1.3956	1.05236	1.11684	1.41307	1.07577	1.11861	1.25488	1.0829	1.03844
1.09577	1.07416	1.09423	1.53902	1.00876	1.04205	1.02501	1.06967	1.06504	1.11178		1.06442	1.38329	1.06257	1.11808	1.39098	1.07162	1.10636	1.30686	1.11346	1.0415
1.12524	1.07194	1.07859	1.47838	1.02755	1.04006	1.02411	1.06536	1.05678	1.09386		1.03808	1.37351	1.06289	1.10968	1.43137	1.11302	1.11377	1.3323	1.11099	1.04268
1.14501	1.09088	1.09587	1.54875	1.02435	1.06351	1.02165	1.05474	1.08044	1.10604		1.07416	1.36526	1.04839	1.12968	1.43608	1.11857	1.11079	1.34221	1.06082	1.03451
1.15118	1.08456	1.09053	1.52113	1.03128	1.07599	1.02821	1.05147	1.07201	1.1085		1.07433	1.34508	1.05343	1.12026	1.44886	1.10539	1.12043	1.37797	1.08417	1.02746
1.13632	1.07982	1.08105	1.60675	1.0297	1.03452	1.03371	1.05499	1.04171	1.0784		1.05545	1.33425	1.05208	1.11253	1.44205	1.07205	1.10756	1.36451	1.1001	1.03818
1.15353	1.07171	1.09443	1.5922	1.03039	1.05281	1.02438	1.05519	1.06741	1.11536		1.05371	1.33157	1.04376	1.10585	1.48046	1.07413	1.10514	1.36056	1.09236	1.02192
1.15189	1.08263	1.08346	1.55803	1.03322	1.01923	1.02652	1.04835	1.09126	1.10946		1.08525	1.32458	1.04098	1.11533	1.42153	1.05276	1.11042	1.35837	1.11228	1.03683
1.16877	1.08792	1.09905	1.58976	1.01975	1.07279	1.03034	1.05897	1.09336	1.11875		1.0803	1.30597	1.04353	1.12587	1.45629	1.04383	1.12739	1.36278	1.04905	1.02953
1.20335	1.09191	1.09729	1.56563	1.02948	1.07636	1.02206	1.05987	1.07276	1.07581		1.0754	1.30727	1.05911	1.1044	1.36681	1	1.08302	1.30043	1.08537	1.03493
1.22773	1.05727	1.09915	1.55064	1.03255	1.07257	1.03315	1.05444	1.08047	1.07183		1.07708	1.28999	1.04896	1.09158	1.38255	1.05118	1.07823	1.35705	1.0932	1.04598
1.20895	1.06662	1.09443	1.52715	1.01358	1.04556	1.03366	1.0667	1.072	1.07769		1.07749	1.27688	1.0513	1.1067	1.37192	1.03435	1.12387	1.33952	1.07218	1.04749
1.2146	1.08172	1.118	1.56688	1.02932	1.0772	1.02578	1.04155	1.07624	1.0859		1.08072	1.27444	1.04489	1.10732	1.37383	1.09436	1.13207	1.3586	1.0799	1.03978
1.18821	1.0714	1.11368	1.50383	1.0246	1.08104	1.02051	1.04981	1.07693	1.13112		1.08458	1.26998	1.0626	1.11247	1.3624	1.08594	1.09558	1.35478	1.08718	1.03113
1.18473	1.08015	1.08945	1.47999	1.02445	1.05392	1.03147	1.04939	1.07109	1.07954		1.05222	1.26449	1.06114	1.10824	1.32367	1.10332	1.11455	1.36275	1.08854	1.02382
1.18097	1.06105	1.08845	1.4873	1.03765	1.0575	1.02206	1.06065	1.08177	1.05782		1.08015	1.24593	1.0598	1.12585	1.34345	1.06752	1.14322	1.35323	1.08492	1.02782
1.15711	1.06414	1.08983	1.52375	1.02641	1.06538	1.03015	1.03356	1.08564	1.10179		1.10415	1.241	1.05601	1.10815	1.26498	1.09453	1.13864	1.34054	1.0698	1.0353
1.14305	1.07328	1.07478	1.4904	1.03632	1.04184	1.04511	1.06622	1.0925	1.07734		1.07474	1.22495	1.05169	1.12118	1.3262	1.07099	1.13359	1.33863	1.07634	1.04035
1.13306	1.061	1.08412	1.42557	1.02473	1.05999	1.01785	1.04759	1.08064	1.06061		1.08461	1.22159	1.06428	1.1276	1.23173	1.07571	1.10936	1.3237	1.083	1.0405
1.12321	1.07705	1.09042	1.4325	1.03196	1.06532	1.02157	1.04761	1.06764	1.07483		1.05792	1.21264	1.05957	1.13428	1.21559	1.12443	1.12059	1.27842	1.07632	1.0374
1.14149	1.07891	1.08702	1.45083	1.03442	1.02677	1.02971	1.04014	1.12631	1.063		1.10436	1.21547	1.05874	1.10794	1.19847	1.05632	1.12001	1.31042	1.06606	1.04304
1.16808	1.07288	1.10648	1.48103	1.02546	1.05748	1.03197	1.05286	1.07926	1.02669		1.09924	1.20307	1.06724	1.13158	1.19258	1.05834	1.11327	1.26758	1.09485	1.03505
1.22251	1.04436	1.10423	1.43446	1.03232	1.06066	1.02886	1.04111	1.09167	1.04412		1.059	1.185	1.07105	1.13553	1.16282	1.0416	1.11651	1.26523	1.07036	1.02989
1.25704	1.07131	1.10271	1.40044	1.0372	1.04034	1.0229	1.0424	1.08679	1.04931		1.08109	1.17975	1.06269	1.11502	1.12961	1.05883	1.11096	1.30123	1.06201	1.02744
1.2479	1.05452	1.09099	1.46163	1.02899	1.03588	1.03085	1.04469	1.08027	1.07536		1.08981	1.17657	1.05537	1.10812	1.10928	1.05892	1.10284	1.29601	1.06968	1.0194
1.26202	1.07766	1.1033	1.45145	1.04816	1.0637	1.03822	1.03887	1.10154	1.12917		1.08288	1.17461	1.06182	1.11209	1.09504	1.06882	1.11819	1.23843	1.08471	1.02228
1.22145	1.0854	1.07069	1.44782	1.04222	1.03131	1.0304	1.03565	1.09435	1.1815		1.11048	1.17112	1.0623	1.12002	1.10708	1.0762	1.13166	1.24057	1.10416	1.02265
1.21209	1.09352	1.08316	1.42518	1.04778	1.02722	1.02386	1.03294	1.06764	1.12749		1.07222	1.16138	1.05086	1.1103	1.08431	1.06308	1.11128	1.25345	1.09431	1.0248
1.21609	1.07073	1.10948	1.42036	1.05127	1.07291	1.03179	1.03714	1.07128	1.10722		1.07991	1.15685	1.05531	1.10208	1.06634	1.1178	1.1137	1.24503	1.07695	1.02164
1.17795	1.07923	1.11667	1.38658	1.04304	1.06513	1.04543	1.031	1.07507	1.15574		1.09869	1.1475	1.06799	1.128	1.08075	1.14474	1.11614	1.2393	1.08482	1.02353
1.15935	1.08457	1.12474	1.45305	1.05368	1.07299	1.03351	1.01443	1.1055	1.14427		1.08646	1.13525	1.06746	1.12124	1.06646	1.16317	1.13565	1.28634	1.11604	1.01884
1.18805	1.06358	1.06256	1.40313	1.06101	1.05897	1.03834	1.02213	1.10823	1.12252		1.11305	1.13818	1.06562	1.10648	1.05938	1.18327	1.12229	1.2784	1.10806	1.01293
1.14784	1.06953	1.10177	1.36793	1.06288	1.06586	1.03304	1.02658	1.09214	1.14504		1.07955	1.12726	1.06261	1.12829	1.05186	1.17292	1.13432	1.26347	1.08936	1.02108
1.16483	1.06685	1.12057	1.45955	1.05088	1.0706	1.05574	1.02914	1.08771	1.14122		1.0991	1.1133	1.06819	1.13452	1.0365	1.15884	1.11135	1.27164	1.11263	1.02073
1.17984	1.06363	1.12633	1.43329	1.06536	1.07019	1.04103	1.01473	1.1137	1.1335		1.11838	1.10746	1.05901	1.12166	1.02573	1.19369	1.11607	1.29078	1.11487	1.00475
1.13673	1.03553	1.11465	1.37256	1.06196	1.07769	1.05259	1.03538	1.10796	1.12557		1.08946	1.10628	1.06781	1.1236	1.03265	1.20165	1.13346	1.30751	1.08662	1.01015
1.13179	1.07793	1.05889	1.36939	1.06697	1.07296	1.05679	1.03307	1.06547	1.13966		1.07058	1.09443	1.05447	1.11723	1.02405	1.23641	1.13277	1.28038	1.09941	1.01463
1.12437	1.06919	1.10305	1.43724	1.05874	1.06437	1.05869	1.02952	1.10693	1.11534		1.10165	1.08088	1.0583	1.09778	1.01147	1.22046	1.14342	1.28603	1.06695	1
1.13781	1.06702	1.062	1.39945	1.06447	1.07454	1.05357	1.01173	1.07337	1.09794		1.11047	1.06808	1.07539	1.11505	1	1.24797	1.12099	1.29961	1.13023	1.00747
1.13582	1.05509	1.07134	1.36873	1.05987	1.07992	1.06344	1.04298	1.09556	1.10073		1.09165	1.06563	1.0585	1.08924	1.01832	1.24401	1.13392	1.29725	1.11495	1.01358
1.18731	1.08208	1.08412	1.38926	1.04913	1.07923	1.05065	1.0235	1.11729	1.09987		1.08056	1.06178	1.07178	1.10599	1.01539	1.24521	1.13375	1.33353	1.08775	1.0178
1.20574	1.05916	1.08888	1.41121	1.06068	1.07689	1.04754	1.02731	1.13335	1.10024		1.07662	1.04146	1.06669	1.09687	1.0215	1.2475	1.10206	1.30194	1.05909	1.01772
1.19224	1.06472	1.09213	1.37344	1.0578	1.07887	1.0564	1.01724	1.12449	1.09739		1.07631	1.04168	1.06374	1.06845	1.0281	1.23804	1.1044	1.29499	1.06003	1.00898
1.19343	1.05847	1.0957	1.37868	1.06269	1.0853	1.07074	1.01082	1.10666	1.12629		1.11364	1.02805	1.06989	1.06666	1.02279	1.22548	1.10884	1.26717	1.09627	1.02071
1.17898	1.07538	1.09885	1.31998	1.08371	1.07264	1.06691	1.01751	1.1014	1.11824		1.08485	1.02346	1.07602	1.07733	1.00268	1.22585	1.09798	1.28517	1.06072	1.01102
1.17651	1.06673	1.07462	1.37453	1.07515	1.08866	1.0661	1.03701	1.1377	1.08088		1.13129	1.01986	1.08191	1.061	1.03017	1.24093	1.07143	1.33954	1.07414	1.01291
1.17791	1.07068	1.10841	1.39901	1.07567	1.08888	1.06363	1.0254	1.10689	1.10211		1.08451	1.0116	1.06194	1.05106	1.0263	1.22566	1.09009	1.32594	1.09296	1.01472
1.1601	1.07093	1.0723	1.41506	1.08246	1.07615	1.07289	1.02239	1.09918	1.12079		1.11968	1.01316	1.08651	1.04926	1.03659	1.22986	1.0636	1.36911	1.12739	1.01848
1.14629	1.05018	1.07605	1.39842	1.07703	1.0753	1.06996	1.02586	1.11858	1.12349		1.13143	1.00391	1.07542	1.05317	1.03274	1.24158	1.04742	1.35768	1.11082	1.02144
1.14784	1.06767	1.03881	1.37631	1.07868	1.08175	1.07229	1.025	1.0962	1.12458		1.13316	1.00339	1.07281	1.03963	1.04079	1.25371	1.09502	1.33986	1.12714	1.01998
1.1504	1.04088	1.04277	1.41245	1.08537	1.08733	1.08397	1.01997	1.12601	1.11759		1.09948	1.0036	1.06481	1.03471	1.02543	1.24806	1.05627	1.34556	1.10803	1.01512
1.14788	1.06974	1.04014	1.41302	1.06957	1.09628	1.08573	1.04245	1.11887	1.13194		1.11664	1.00396	1.07094	1.0364	1.02824	1.23383	1.07574	1.28355	1.09015	1.01317
1.14526	1.05352	1.00769	1.45171	1.08777	1.08254	1.10179	1.04901	1.10643	1.11867		1.1239	1.00788	1.06593	1.02976	1.02358	1.2746	1.04751	1.39095	1.11521	1.02495
1.13616	1.07604	1.01055	1.45329	1.08132	1.10166	1.08611	1.05505	1.10684	1.06801		1.11266	1.00195	1.0618	1.03093	1.02744	1.24382	1.06008	1.37821	1.0883	1.01139
1.1522	1.06555	1.01109	1.39799	1.07406	1.09704	1.09624	1.04283	1.14948	1.0699		1.1255	1	1.07199	1.02595	1.032	1.25257	1.04829	1.36402	1.11115	1.02645
1.12347	1.05071	1.0159	1.46362	1.08313	1.0948	1.09459	1.0487	1.09594	1.08136		1.11446	1.00883	1.05613	1.02234	1.04169	1.26077	1.04711	1.37894	1.10777	1.02295
1.13106	1.05821	1.01874	1.39405	1.0619	1.06999	1.09525	1.04781	1.10119	1.10058		1.10156	1.00611	1.05951	1.02679	1.0567	1.26065	1.05476	1.35461	1.15293	1.0349
1.13871	1.05753	1.07058	1.41673	1.0988	1.09834	1.10851	1.03599	1.11725	1.09173		1.08438	1.01233	1.07434	1.03078	1.05223	1.2526	1.03221	1.37674	1.12026	1.03821
1.11153	1.05436	1.03753	1.38068	1.08671	1.10576	1.10921	1.04625	1.14962	1.09408		1.09486	1.01308	1.06594	1.02549	1.04407	1.2297	1.03961	1.34567	1.13564	1.03776
1.12169	1.05551	1.02966	1.40859	1.10322	1.10755	1.10434	1.07202	1.16175	1.10221		1.09661	1.01549	1.0649	1.02859	1.06601	1.25777	1.01841	1.36034	1.12214	1.04071
1.12087	1.04956	1.04291	1.49466	1.08517	1.10794	1.11813	1.06763	1.13537	1.17378		1.0816	1.02414	1.06161	1	1.06445	1.25912	1.04789	1.41619	1.12622	1.04248
1.12358	1.06444	1.03897	1.42748	1.11464	1.11026	1.12635	1.08089	1.09812	1.10719		1.08485	1.02701	1.05812	1.02662	1.06237	1.2467	1.06506	1.41543	1.12327	1.04335
1.1055	1.04122	1.01414	1.42522	1.11002	1.11915	1.1196	1.06658	1.17841	1.11039		1.07961	1.02803	1.0457	1.02724	1.07767	1.25295	1.05495	1.37218	1.13017	1.05085
1.11084	1.06197	1	1.45392	1.11119	1.10727	1.12699	1.07022	1.10248	1.1139		1.10749	1.03522	1.06532	1.02531	1.07474	1.26939	1.06228	1.4004	1.14187	1.03395
1.11452	1.05907	1.04954	1.36062	1.11111	1.12168	1.13006	1.07518	1.1304	1.11866		1.08432	1.03531	1.06165	1.03338	1.07627	1.26665	1.03086	1.404	1.17905	1.048
1.11148	1.06133	1.02585	1.44101	1.11567	1.12259	1.12722	1.09412	1.13697	1.1466		1.09293	1.0485	1.03653	1.03242	1.07148	1.26037	1.04964	1.39522	1.14656	1.06203
1.11048	1.0386	1.00563	1.41359	1.12475	1.1315	1.11664	1.10622	1.17567	1.1386		1.10196	1.04248	1.00159	1.01144	1.0743	1.23352	1.02455	1.40869	1.12678	1.04661
1.11594	1.04021	1.02074	1.3884	1.12825	1.13174	1.13094	1.10957	1.13945	1.13824		1.06072	1.05822	1.04312	1.00069	1.08319	1.2397	1.02387	1.40102	1.19426	1.06007
1.0982	1.05193	1.02603	1.43626	1.11007	1.12943	1.13448	1.10716	1.14485	1.16457		1.07696	1.05303	1.04344	1.06242	1.08662	1.22988	1.03341	1.35429	1.1726	1.06909
1.12347	1.06099	1.06409	1.46416	1.12526	1.1355	1.13895	1.10917	1.14575	1.15553		1.11142	1.06281	1.04171	1.05176	1.08818	1.22529	1.0385	1.36153	1.188	1.06075
1.11787	1.03619	1.03465	1.46086	1.13216	1.13347	1.14246	1.09708	1.14837	1.13091		1.07329	1.06802	1.03143	1.04223	1.08355	1.23964	1.05517	1.34567	1.16641	1.0642
1.11517	1.0624	1.0539	1.40717	1.12337	1.14573	1.1552	1.11685	1.17247	1.12576		1.12433	1.07998	1.03254	1.06264	1.0981	1.23961	1.03746	1.38768	1.16264	1.06178
1.11312	1.05404	1.04225	1.42667	1.14548	1.13415	1.15661	1.12875	1.1625	1.1171		1.10687	1.09087	1.03754	1.07191	1.11269	1.2371	1.04474	1.4065	1.14373	1.09973
1.12187	1.04846	1.04002	1.45424	1.11767	1.13898	1.16825	1.11817	1.1833	1.1168		1.13533	1.09655	1.02933	1.07424	1.10841	1.2132	1.0678	1.38653	1.1667	1.09495
1.1282	1.06294	1.07343	1.45548	1.15243	1.13916	1.17113	1.13628	1.18914	1.1158		1.10112	1.08912	1.02915	1.08329	1.11498	1.19772	1.0361	1.37982	1.14213	1.09435
1.13744	1.06846	1.06932	1.47373	1.15186	1.15144	1.16471	1.15148	1.14312	1.14149		1.14273	1.10116	1.02469	1.09206	1.12342	1.17361	1.05481	1.40354	1.1327	1.1197
1.14122	1.05209	1.0942	1.51461	1.13623	1.14515	1.18325	1.12798	1.17874	1.14005		1.11411	1.11418	1.01641	1.10303	1.12208	1.14757	1.04504	1.42886	1.12914	1.11645
1.14189	1.06613	1.09776	1.49822	1.15664	1.14847	1.18441	1.11396	1.11965	1.15112		1.15944	1.11927	1.02418	1.08297	1.14951	1.15324	1.08394	1.41727	1.15914	1.12208
1.15571	1.03819	1.10488	1.48114	1.15799	1.15246	1.17222	1.15756	1.1526	1.1611		1.16712	1.12638	1.00222	1.12254	1.14068	1.16248	1.05402	1.39206	1.20166	1.14302
1.13762	1.06259	1.10853	1.50363	1.1843	1.17305	1.19377	1.1576	1.19388	1.14574		1.14575	1.13268	1.02892	1.12815	1.14812	1.18648	1.08553	1.44333	1.22145	1.13308
1.15329	1.06588	1.11877	1.52587	1.18887	1.17189	1.19484	1.16018	1.16593	1.12836		1.19338	1.14762	1.04636	1.14452	1.15179	1.19063	1.07994	1.41663	1.21599	1.11508
1.14985	1.07923	1.11055	1.53845	1.18246	1.17067	1.2033	1.19181	1.207	1.17548		1.19434	1.1544	1.06976	1.12274	1.15958	1.20165	1.12663	1.43768	1.17922	1.16828
1.15063	1.07997	1.13761	1.43946	1.19459	1.17478	1.19864	1.13705	1.17959	1.20684		1.20407	1.16059	1.10161	1.13324	1.16465	1.18811	1.13877	1.47242	1.1703	1.16923
1.15967	1.08255	1.16973	1.47508	1.19487	1.1826	1.20311	1.17469	1.19135	1.18843		1.22345	1.17988	1.09951	1.17147	1.18328	1.1624	1.17102	1.43602	1.18518	1.179
1.18066	1.09587	1.16295	1.54486	1.20089	1.19621	1.19688	1.18637	1.18182	1.18365		1.17209	1.18383	1.16278	1.17618	1.17834	1.19177	1.18217	1.47042	1.17583	1.16867
1.17133	1.1522	1.1987	1.47034	1.18115	1.19417	1.19208	1.19629	1.18825	1.19332		1.1985	1.19374	1.17202	1.19855	1.19528	1.19337	1.16922	1.47133	1.20379	1.22219
1.20851	1.27744	1.20609	1.54266	1.22216	1.20237	1.19846	1.21019	1.2184	1.21648		1.23962	1.2085	1.2114	1.21152	1.22441	1.22165	1.21705	1.52647	1.21242	1.21763
1.20112	1.34251	1.20838	1.54349	1.23849	1.21515	1.18629	1.2191	1.22839	1.19312		1.24119	1.21531	1.26	1.2215	1.20838	1.2157	1.23915	1.47087	1.21277	1.23371
1.20428	1.43138	1.23975	1.54902	1.21644	1.21111	1.19047	1.24626	1.18347	1.22832		1.25708	1.24861	1.31746	1.19347	1.22573	1.20778	1.23222	1.4974	1.2445	1.24108
1.21244	1.47741	1.2467	1.5172	1.23364	1.22048	1.1996	1.22565	1.22356	1.24537		1.25362	1.25658	1.35523	1.26456	1.24035	1.20488	1.22254	1.53084	1.23252	1.24887
1.22911	1.53723	1.26784	1.53121	1.25531	1.22494	1.21424	1.21373	1.20946	1.2289		1.25983	1.26452	1.41613	1.25686	1.23668	1.22601	1.26295	1.51517	1.25862	1.26
1.24215	1.56247	1.32147	1.5718	1.25167	1.25673	1.23279	1.23033	1.18179	1.24422		1.24903	1.27206	1.49228	1.27479	1.27336	1.25759	1.28399	1.53056	1.26424	1.28555
1.26014	1.68847	1.32374	1.60824	1.27971	1.2698	1.2067	1.26409	1.2441	1.2404		1.2471	1.2891	1.57842	1.29821	1.27237	1.25176	1.3413	1.54004	1.23857	1.29974
1.25008	1.76249	1.33522	1.55193	1.27096	1.2556	1.21962	1.26964	1.25755	1.24159		1.30292	1.31021	1.67061	1.31147	1.28019	1.26412	1.34528	1.56055	1.26569	1.30644
1.21754	1.87677	1.36703	1.59801	1.2718	1.24582	1.21563	1.27925	1.30265	1.19097		1.29706	1.32939	1.73883	1.33364	1.29189	1.25131	1.35527	1.55067	1.25359	1.33496
1.22216	1.9972	1.38823	1.62544	1.28524	1.26749	1.24011	1.27445	1.30954	1.227		1.30264	1.34076	1.85301	1.31347	1.30425	1.24252	1.37689	1.55112	1.26956	1.36039
1.24655	2.19861	1.40455	1.66861	1.27487	1.28169	1.26972	1.30313	1.34509	1.22402		1.30113	1.36857	1.95449	1.3865	1.30411	1.29302	1.37522	1.53157	1.27193	1.39761
1.23937	2.64402	1.44422	1.65542	1.28889	1.28828	1.24186	1.31363	1.38065	1.20629		1.27947	1.38351	2.09499	1.3667	1.33349	1.29675	1.3756	1.49106	1.20644	1.42145
1.27008	3.4436	1.46605	1.65497	1.32578	1.27811	1.28096	1.29972	1.39714	1.25849		1.34661	1.39813	2.20584	1.39931	1.34944	1.35396	1.42387	1.52611	1.22598	1.43807
1.29551	3.90585	1.47161	1.63033	1.32917	1.31293	1.2762	1.34434	1.41161	1.23622		1.30374	1.42019	2.32352	1.4277	1.34654	1.4023	1.45666	1.53424	1.24547	1.44985
1.30799	3.98361	1.51115	1.62766	1.3469	1.32248	1.26314	1.33995	1.40472	1.27821		1.33893	1.44396	2.47868	1.4742	1.39806	1.35204	1.4702	1.50431	1.24589	1.48383
1.31917	5.45786	1.54941	1.66313	1.33263	1.31479	1.24295	1.3298	1.41611	1.28736		1.35488	1.45633	2.61643	1.49779	1.42804	1.37484	1.46833	1.53475	1.20611	1.50167
1.3484	6.02495	1.55784	1.64706	1.32748	1.34967	1.27573	1.32412	1.4747	1.31004		1.3922	1.48398	2.76426	1.50308	1.44484	1.43702	1.46903	1.53992	1.21893	1.54321
1.33213	6.80175	1.5787	1.61854	1.39509	1.35901	1.26227	1.39332	1.4365	1.31377		1.35517	1.49962	2.8813	1.54177	1.44047	1.382	1.48082	1.5683	1.23131	1.56437
1.32086	7.20609	1.60903	1.68105	1.38709	1.37023	1.30744	1.34507	1.50454	1.28744		1.39296	1.52614	3.02867	1.56791	1.45647	1.43267	1.51623	1.5305	1.20449	1.59165
1.36253	7.51893	1.64887	1.7264	1.43906	1.3629	1.29183	1.39015	1.45927	1.2762		1.38935	1.55157	3.16291	1.55393	1.48126	1.41782	1.5651	1.55186	1.24647	1.61298
1.3901	8.06319	1.69405	1.74385	1.42853	1.37008	1.29649	1.37636	1.53836	1.27529		1.4079	1.57506	3.15944	1.62684	1.5139	1.4104	1.55265	1.5308	1.21069	1.6486
1.41417	7.91788	1.69487	1.73741	1.43864	1.38733	1.34336	1.41554	1.57082	1.30469		1.41074	1.60595	3.24762	1.63551	1.47622	1.38421	1.5736	1.51982	1.23314	1.71411
1.41704	8.19541	1.73891	1.63964	1.46301	1.42053	1.34299	1.41347	1.562	1.32568		1.44747	1.61505	3.29589	1.70102	1.52952	1.40397	1.54759	1.57402	1.25845	1.73297
1.42736	8.39701	1.76465	1.66196	1.46307	1.38231	1.32503	1.43877	1.56576	1.34056		1.49495	1.65388	3.5018	1.73309	1.5395	1.41934	1.5954	1.51551	1.26398	1.79799
1.45912	8.30785	1.80124	1.70341	1.51332	1.41685	1.3375	1.45881	1.55788	1.34803		1.44339	1.67812	3.62546	1.77622	1.56068	1.42534	1.63832	1.55536	1.25403	1.83291
1.45823	8.65672	1.84205	1.65611	1.49291	1.36278	1.33282	1.48225	1.56484	1.38719		1.51023	1.70176	3.76307	1.77793	1.57521	1.4505	1.63618	1.55981	1.29993	1.87963
1.43597	8.36032	1.92753	1.6772	1.53562	1.38663	1.35397	1.46384	1.58959	1.43955		1.52383	1.73327	3.78378	1.86101	1.602	1.45482	1.68059	1.61794	1.3173	1.92798
1.46426	8.48306	1.93952	1.58447	1.55901	1.39876	1.35417	1.46361	1.60658	1.41659		1.51118	1.76195	3.92631	1.88523	1.61711	1.41862	1.71159	1.65051	1.27553	1.97064
1.44488	8.69059	2.00759	1.61109	1.56666	1.36169	1.69948	1.46423	1.64383	1.4264		1.58313	1.79233	4.05824	1.89773	1.65525	1.41573	1.7268	1.64653	1.29184	2.0344
1.46941	8.4261	2.01726	1.60313	1.60114	1.34831	2.39093	1.48744	1.60331	1.41744		1.60962	1.81167	4.18492	1.91156	1.64503	1.37098	1.74728	1.65741	1.30087	2.07196
1.48263	8.77328	2.10494	1.56113	1.61099	1.36324	2.68233	1.4524	1.64827	1.42994		1.57853	1.84962	4.32836	1.97819	1.6713	1.35955	1.81885	1.66796	1.32349	2.15436
1.48756	8.48453	2.15781	1.60087	1.62967	1.40011	2.86271	1.47668	1.59103	1.37538		1.5796	1.87256	4.39575	2.04048	1.69595	1.41687	1.84948	1.68628	1.31479	2.20332
1.52781	8.64693	2.1932	1.559	1.63968	1.38478	3.09498	1.49114	1.63353	1.41247		1.60077	1.90373	4.50468	2.09734	1.73725	1.37081	1.8801	1.68383	1.29441	2.28869
1.53261	8.46295	2.25549	1.60817	1.65199	1.35665	3.41467	1.51907	1.64435	1.45109		1.64828	1.94052	4.58068	2.12817	1.73609	1.38631	1.9032	1.70265	1.29519	2.32178
1.50156	8.43042	2.31849	1.53024	1.68935	1.37216	3.86192	1.52579	1.65901	1.46852		1.6524	1.97137	4.72039	2.19456	1.77126	1.33893	1.9266	1.74133	1.33207	2.38625
1.50196	8.62346	2.33359	1.49388	1.70053	1.37591	4.13708	1.48149	1.70482	1.44572		1.66507	2.00581	4.79885	2.26957	1.78403	1.29382	2.00406	1.74055	1.33173	2.45811
1.5684	8.46553	2.44384	1.5525	1.72553	1.39454	4.16192	1.49469	1.67703	1.44457		1.65068	2.04149	4.86189	2.3153	1.83567	1.34202	1.98401	1.7535	1.29484	2.53271
1.60134	8.64772	2.45556	1.5238	1.74243	1.41464	4.16293	1.49584	1.70045	1.50048		1.73836	2.06022	4.99336	2.36733	1.86523	1.35619	1.98576	1.76564	1.27686	2.62034
1.603	8.5691	2.56716	1.5298	1.78656	1.38592	4.30229	1.48698	1.68698	1.49845		1.7129	2.09485	5.11953	2.40319	1.86208	1.32831	2.04591	1.75009	1.30706	2.64823
1.64244	8.38262	2.65628	1.52589	1.79019	1.41494	4.42442	1.489	1.6676	1.52079		1.80192	2.10782	5.10358	2.47177	1.92606	1.33914	2.04802	1.76277	1.27213	2.75069
1.63689	8.70427	2.69411	1.54869	1.86202	1.39528	4.58563	1.44609	1.70516	1.51789		1.77623	2.14934	5.16096	2.50341	1.94529	1.3581	2.10339	1.7624	1.31594	2.82417
1.65841	8.3732	2.76018	1.5833	1.85341	1.38916	4.61995	1.45755	1.69786	1.5676		1.81113	2.17665	5.34752	2.60039	1.97961	1.3564	2.11068	1.76276	1.31685	2.88875
1.66716	8.51186	2.84116	1.55979	1.90049	1.3865	4.66791	1.45263	1.70947	1.53113		1.84087	2.18702	5.35603	2.66105	2.00338	1.36695	2.14628	1.79677	1.29601	3.01664
1.68276	8.46263	2.88591	1.62477	1.89894	1.39154	4.593	1.45464	1.74219	1.53773		1.80927	2.20799	5.34161	2.72121	2.02239	1.38741	2.18148	1.78672	1.31018	3.07378
1.68267	8.30641	2.97273	1.61424	1.88196	1.40171	4.66829	1.41774	1.74258	1.60541		1.92688	2.21581	5.42474	2.75399	2.05805	1.32198	2.17975	1.78807	1.31988	3.17089
1.68427	8.6745	3.09382	1.60817	2.01599	1.40396	4.7907	1.49919	1.7399	1.58719		1.94829	2.23515	5.48533	2.81632	2.11122	1.34399	2.24122	1.82804	1.29204	3.24335
1.70075	8.32431	3.19525	1.65501	1.99879	1.40831	4.86238	1.46327	1.77163	1.65811		1.97489	2.25156	5.44044	2.90966	2.12691	1.36942	2.30362	1.84532	1.30509	3.33016
1.74465	8.56575	3.18853	1.67935	2.0423	1.42612	4.933	1.46406	1.77857	1.68434		1.97222	2.25906	5.38019	2.95919	2.15753	1.41055	2.36634	1.85038	1.32724	3.4104
1.80075	8.16957	3.24782	1.71607	2.05106	1.43221	5.0303	1.44878	1.74806	1.61758		2.02398	2.27848	5.51853	3.06245	2.21103	1.4084	2.40427	1.90802	1.32048	3.52995
2.03869	8.36093	3.35594	1.73355	2.15547	1.43817	5.0484	1.45273	1.78363	1.65302		2.06086	2.28227	5.4856	3.10642	2.21043	1.41927	2.43401	1.89265	1.32632	3.59747
2.22407	8.36699	3.43707	1.7698	2.17198	1.41717	4.99817	1.48111	1.79079	1.63072		2.07837	2.31372	5.53919	3.18674	2.26468	1.404	2.49504	1.86372	1.33448	3.65911
2.35658	8.24787	3.57276	1.8187	2.2017	1.4661	5.08513	1.47916	1.77664	1.66707		2.09376	2.3096	5.49744	3.18075	2.33286	1.395	2.56052	1.88428	1.36546	3.77712
2.49683	8.33911	3.64082	1.81087	2.23787	1.4497	5.14182	1.46196	1.78641	1.66969		2.14743	2.31708	5.61837	3.20654	2.3273	1.42878	2.59576	1.89259	1.40506	3.87675
2.53216	8.15334	3.68869	1.86862	2.29771	1.45664	5.49995	1.49172	1.75344	1.65581		2.13204	2.35651	5.5152	3.35027	2.34542	1.48843	2.65094	1.91318	1.41498	3.94437
2.55198	8.2853	3.77844	1.91457	2.36909	1.41812	5.39023	1.4475	1.87174	1.66613		2.17571	2.36014	5.63048	3.39461	2.38728	1.48422	2.67436	1.97229	1.41508	4.02255
2.54147	8.05105	3.9463	1.90557	2.37053	1.49834	5.29552	1.47505	1.81939	1.67872		2.24731	2.36725	5.53034	3.37957	2.45349	1.47838	2.64818	1.91842	1.39255	4.10085
2.61078	8.08465	3.98693	1.95145	2.38102	1.51341	5.41315	1.45708	1.83086	1.69263		2.27369	2.40364	5.62195	3.49425	2.49432	1.51129	2.71561	1.89225	1.38786	4.23969
2.59258	8.26442	4.06157	1.97938	2.49859	1.4861	5.52099	1.47135	1.83252	1.64871		2.32559	2.41946	5.5781	3.61775	2.53264	1.61831	2.73397	1.89366	1.41513	4.28526
2.59269	8.11993	4.12615	2.02204	2.49412	1.47871	4.98928	1.47435	1.81467	1.7059		2.35227	2.43461	5.71579	3.47232	2.56173	1.72803	2.78615	1.89197	1.39846	4.41108
2.68528	8.02365	4.20671	2.03584	2.65186	1.49627	5.12479	1.46453	1.83569	1.71341		2.4501	2.45826	5.67471	3.61318	2.6378	1.72329	2.77723	1.90396	1.39891	4.45417
2.72217	8.01646	4.36298	2.08081	2.64869	1.53378	5.4242	1.47617	1.85996	1.83631		2.4637	2.46106	5.60518	3.60924	2.66489	1.78668	2.80108	1.91364	1.35792	4.54763
2.67507	7.99395	4.41124	2.10376	2.71884	1.53218	5.18512	1.48076	1.86289	1.82563		2.38446	2.47196	5.6859	3.7426	2.70916	1.84636	2.87088	1.88649	1.37989	4.62634
2.69262	7.9143	4.51165	2.14962	2.73616	1.52763	5.38023	1.50868	1.86582	1.84747		2.47729	2.51239	5.81573	3.73379	2.7237	1.78343	2.91842	1.85957	1.38435	4.71478
2.73249	8.01327	4.5719	2.215	2.8036	1.58993	5.43067	1.48137	1.8868	1.8304		2.52848	2.51469	5.71701	3.77943	2.77048	1.81211	3.00815	1.88298	1.38985	4.75096
2.85816	8.06306	4.70804	2.23258	2.85199	1.58959	5.53647	1.48573	1.87142	1.797		2.54157	2.53673	5.65366	3.86824	2.83611	1.83074	3.04606	1.86181	1.44739	4.80496
3.95885	8.04985	4.77028	2.24993	2.93473	1.57201	5.68962	1.49985	1.92317	1.76505		2.58798	2.57724	5.80116	3.84306	2.89712	1.85942	3.07097	1.86446	1.4639	4.84414
5.46609	8.05646	4.91064	2.29431	3.00698	1.60188	5.77338	1.53658	1.91231	1.75787		2.69548	2.57863	5.71911	3.87781	2.95495	1.76158	3.1609	1.86187	1.4587	4.94381
6.97612	7.97307	5.03126	2.30259	3.07913	1.63609	5.82267	1.51181	1.91104	1.73369		2.70259	2.61416	5.78057	3.86591	2.99432	1.70021	3.20125	1.76986	1.44913	5.0284
8.18643	8.10318	5.07268	2.34237	3.16255	1.63333	6.02879	1.51204	1.9123	1.78109		2.70642	2.63164	5.74172	3.96339	3.03641	1.71887	3.32545	1.81842	1.43315	5.06579
9.31618	7.98647	5.19289	2.36512	3.22571	1.65032	6.08358	1.5194	1.90184	1.82961		2.8959	2.66843	5.7946	3.94813	3.0897	1.6706	3.5029	1.8229	1.44996	5.10362
10.2868	8.11928	5.25863	2.42038	3.30497	1.63694	6.20015	1.52101	1.94601	1.93112		2.89398	2.68914	5.83713	4.04808	3.14357	1.70363	3.57443	1.84052	1.49277	5.18347
10.929	7.94416	5.42876	2.44019	3.35905	1.61256	6.29796	1.5256	1.92733	1.94308		2.85716	2.72626	5.84749	4.09144	3.19474	1.72943	3.66219	1.84501	1.49963	5.23015
11.5093	8.0422	5.53092	2.48574	3.47605	1.71403	6.50926	1.5266	2.01748	1.94133		2.92937	2.74488	5.85509	4.08712	3.22178	1.7068	3.72275	1.83098	1.48382	5.32737
11.8474	8.10211	5.65565	2.51542	3.55008	1.68775	6.59961	1.54427	1.96185	1.92197		2.95551	2.78044	5.84413	4.06861	3.27127	1.71871	3.72381	1.89826	1.46093	5.31984
12.0313	8.12063	5.78384	2.56155	3.53612	1.70727	6.76729	1.58663	1.95032	1.948		2.9694	2.81772	5.89554	4.26754	3.32298	1.7509	3.69335	1.87267	1.47291	5.42975
12.2063	8.10289	5.83297	2.54999	3.65288	1.74833	7.03743	1.54855	1.96926	2.41467		2.93518	2.83625	5.8492	4.19616	3.3756	1.76075	3.74011	1.91368	1.47425	5.40976
12.3273	8.09376	5.95383	2.63052	3.83078	1.70615	7.22691	1.57561	1.99751	2.66483		3.16718	2.86442	5.93545	4.26983	3.40419	1.79616	3.81909	1.9748	1.47871	5.43728
12.3844	7.9832	6.07693	2.63154	3.93742	1.75559	7.44418	1.58645	2.02762	2.83319		3.19263	2.90319	5.87808	4.20888	3.46362	1.77744	3.81703	2.03889	1.43958	5.54347
12.3907	8.15788	6.17786	2.64751	3.96666	1.7801	7.56841	1.60282	2.04003	2.84435		3.21625	2.93903	6.02196	4.30036	3.52886	1.78406	3.82834	2.01079	1.42625	5.56969
12.3994	8.15564	6.28491	2.72861	4.1158	1.78653	7.87439	1.62986	2.03708	2.79309		3.26709	2.96116	5.86924	4.20501	3.61263	1.81929	3.87677	2.06954	1.51316	5.59952
12.363	8.22857	6.44041	2.75644	4.24138	1.81056	7.99255	1.63154	2.05794	2.75136		3.31826	2.98647	5.99933	4.32115	3.62836	1.76891	3.85514	2.08924	1.52351	5.69344
12.4795	8.15125	6.55636	2.79327	4.34107	1.84992	8.2101	1.64232	2.03221	2.77327		3.30102	3.01108	5.99465	4.36243	3.68347	1.75175	3.90521	2.16974	1.51831	5.6643
12.4287	8.20505	6.78282	2.83128	4.39093	1.83264	8.36631	1.64313	2.06066	3.00853		3.47638	3.04823	6.00298	4.38788	3.76094	1.76574	3.90993	2.2717	1.51227	5.72666
12.4743	8.22751	6.90896	2.86591	4.516	1.84359	8.47765	1.67978	2.0652	2.96977		3.51206	3.09348	6.01298	4.34668	3.76029	1.72897	3.97683	2.26051	1.52348	5.74124
12.3875	8.17231	7.13428	2.88124	4.69594	1.90009	8.55	1.67643	2.10301	3.07136		3.59622	3.12557	5.95639	4.37941	3.83007	1.73813	3.94242	2.22555	1.52199	5.80831
12.4324	8.30365	7.25427	2.91464	4.75673	1.90275	8.77359	1.70537	2.10012	3.11566		3.62927	3.13158	5.96991	4.50852	3.8831	1.77055	4.00145	2.26658	1.51787	5.86689
12.3759	8.23456	7.44854	2.96663	4.87283	1.96382	8.66301	1.6901	2.10311	3.15507		3.65652	3.17815	6.0129	4.39916	3.94378	1.78767	4.03763	2.2838	1.51974	5.90197
12.3958	8.2209	7.70452	2.98651	4.97092	1.95181	8.73337	1.73145	2.10685	3.15339		3.7997	3.21557	5.97844	4.48229	3.9796	1.76076	4.01687	2.31817	1.54935	5.92238
12.4362	8.32687	7.66669	3.01226	5.11753	1.99819	8.74246	1.74258	2.12683	3.20145		3.95688	3.25059	6.03812	4.42136	3.98757	1.75929	4.10955	2.30915	1.54667	6.05429
12.3452	8.34776	7.76991	3.07213	5.19518	2.05773	8.87157	1.75092	2.1685	3.17223		3.88475	3.26984	6.03402	4.41045	4.08453	1.71177	4.17317	2.35329	1.55384	6.04467
12.288	8.19654	7.9703	3.11594	5.28692	2.0456	8.85554	1.74482	2.1379	3.17718		3.95339	3.30925	6.02881	4.45943	4.10185	1.70793	4.21285	2.40323	1.55337	6.11094
12.3485	8.31915	7.90502	3.10199	5.42177	2.08192	9.02027	1.74166	2.22234	3.29824		4.14383	3.3377	6.07483	4.67997	4.17655	1.70788	4.27008	2.41241	1.59117	6.09631
12.3454	8.28462	8.1376	3.13002	5.5842	2.08529	9.08857	1.7206	2.20441	3.37789		4.03838	3.35636	6.09094	4.64462	4.18528	1.70842	4.2254	2.45402	1.63986	6.18747
12.4315	8.38081	8.19964	3.19801	5.6407	2.1557	8.97616	1.77818	2.18478	3.39866		4.12375	3.41394	6.1461	4.67564	4.24222	1.75212	4.29988	2.43874	1.63413	6.16317
12.4379	8.36298	8.29168	3.18133	5.75126	2.12873	9.03694	1.78516	2.26084	3.35052		4.21034	3.42856	6.08135	4.44098	4.30097	1.77074	4.28189	2.45897	1.67366	6.22714
12.4384	8.42671	8.35257	3.28887	5.9188	2.11492	9.14575	1.80072	2.27438	3.31436		4.36949	3.47609	6.15517	4.58288	4.36656	1.71348	4.3244	2.51681	1.7035	6.29057
12.4682	8.38368	8.41202	3.3124	6.12789	2.10456	9.04425	1.84288	2.28423	3.37772		4.37857	3.49674	6.14	4.71728	4.41488	1.68803	4.41061	2.53617	1.69216	6.29977
12.5227	8.3396	8.54227	3.3806	6.29715	2.12943	9.08945	1.84263	2.31218	3.52428		4.47173	3.51437	6.14913	4.67143	4.44458	1.72059	4.5115	2.55049	1.68813	6.36952
12.4768	8.34971	8.80537	3.43449	6.39891	2.15903	9.19703	1.87462	2.30662	3.61763		4.47798	3.52712	6.09325	4.64036	4.46942	1.72991	4.51259	2.56392	1.73843	6.40975
12.4581	8.40558	8.85758	3.47656	6.53379	2.15653	9.23813	1.87403	2.35971	3.57873		4.55437	3.57155	6.10285	4.75227	4.53166	1.76743	4.54437	2.65858	1.73621	6.42327
12.4258	8.35294	9.00325	3.53985	6.67708	2.18021	9.13672	1.90989	2.38703	3.67345		4.60413	3.5802	6.19233	4.73402	4.5744	1.73082	4.51267	2.66269	1.73318	6.45403
12.3706	8.26001	9.18279	3.62347	6.81651	2.18498	9.2759	1.92578	2.37995	3.53692		4.69717	3.6172	6.09108	4.73712	4.6464	1.78837	4.56322	2.71559	1.74712	6.49901
12.3771	8.21843	9.18259	3.68391	6.93871	2.21863	9.18913	1.93601	2.44398	3.58958		4.73863	3.63858	6.13832	4.67508	4.69631	1.78336	4.54081	2.78757	1.76365	6.55051
12.3797	8.37065	9.1958	3.81106	7.05941	2.25123	9.03195	1.9336	2.40183	3.6649		4.83548	3.6732	6.09291	4.78452	4.68302	1.79131	4.55577	2.79098	1.78265	6.56617
12.3147	8.25942	9.4199	3.93345	7.17353	2.242	9.05719	1.96194	2.46791	3.78425		4.91894	3.7053	6.14894	4.76903	4.77515	1.80145	4.5822	2.84532	1.78188	6.57868
12.2064	8.39527	9.52155	3.98913	7.41671	2.29192	8.97393	2.02154	2.48742	3.84749		4.91655	3.71332	6.08026	4.79136	4.79117	1.81791	4.74289	2.86085	1.79408	6.66468
12.2058	8.31039	9.49065	4.21302	7.46535	2.32445	9.21156	2.04969	2.48491	3.93296		4.96901	3.7121	6.18176	4.87781	4.86213	1.77619	4.72085	2.92659	1.7512	6.59164
12.1476	8.40508	9.67997	4.33042	7.58324	2.33059	9.07088	2.05076	2.48575	4.02418		5.02991	3.75452	6.15501	4.80856	4.83556	1.77056	4.76384	2.91327	1.74764	6.71294
12.0661	8.43031	9.70867	4.3638	7.72618	2.37544	9.17938	2.08817	2.54751	4.11804		5.19462	3.78306	6.19277	4.92099	4.87231	1.82692	4.7457	3.02679	1.78188	6.68041
12.0236	8.37495	9.79356	4.42685	7.82471	2.40896	9.25851	2.08539	2.62754	4.12782		5.17694	3.78947	6.15173	4.84276	4.92385	1.79927	4.8235	3.01953	1.78784	6.81122
11.9655	8.32786	9.75384	4.5194	7.9542	2.52516	9.25786	2.0998	2.57561	4.13581		5.34195	3.88681	6.19892	4.93315	4.97869	1.78822	4.8088	3.00341	1.79294	6.73442
11.9076	8.2563	9.94251	4.57313	8.13054	2.52011	9.34465	2.1537	2.63749	4.25039		5.38862	3.90497	6.22659	4.95704	4.99641	1.80792	4.77292	3.05798	1.796	6.82064
11.8946	8.34769	9.97889	4.63724	8.06978	2.60891	9.24709	2.16001	2.64098	4.3757		5.23497	3.90609	6.13054	5.02968	5.03799	1.82602	4.8764	3.06746	1.77877	6.849
11.7894	8.31062	9.92604	4.72884	8.25983	2.61918	9.43694	2.1822	2.63931	4.31204		5.42991	3.92518	6.18227	4.97125	5.06823	1.86358	4.89419	3.12858	1.77264	6.83357
11.8318	8.35212	10.0007	4.79314	8.31298	2.79393	9.38126	2.22788	2.69998	4.56492		5.52755	3.93246	6.14403	4.95713	5.12357	1.89007	4.91624	3.1393	1.79012	6.94728
11.6855	8.19935	10.066	4.82757	8.3506	2.8145	9.3724	2.27934	2.75912	4.53812		5.66638	3.92094	6.18295	4.97763	5.1325	1.89999	4.92691	3.19247	1.80555	6.87007
11.6929	8.35369	10.1031	4.87622	8.4758	2.80823	9.37871	2.31497	2.82636	4.65951		5.67695	3.95341	6.21756	5.04339	5.15026	1.92643	4.97315	3.13542	1.80767	6.99381
11.6717	8.2949	10.2503	4.92623	8.56058	2.90271	9.45292	2.34295	2.77141	4.7604		5.71119	3.95304	6.23049	5.06553	5.19445	1.96685	5.00109	3.22286	1.83324	6.94347
11.5225	8.38177	10.3093	4.95772	8.64016	3.05	9.50828	2.38422	2.85701	5.03917		5.48889	3.93999	6.25511	5.15921	5.2043	1.95142	4.95086	3.23192	1.89396	6.9642
11.5088	8.29403	10.2933	4.98004	8.72903	3.11195	9.5215	2.4158	2.90864	5.02515		5.45054	3.97193	6.28937	5.06487	5.24995	1.86476	5.04881	3.30756	1.88009	7.03168
11.4161	8.28756	10.2864	5.07642	8.84228	3.14099	9.40076	2.48013	2.92862	5.02023		5.64021	3.97759	6.26102	5.08093	5.28103	1.91233	5.04411	3.2966	1.87378	7.09495
11.3139	8.25689	10.3025	5.09656	8.9648	3.16932	9.43748	2.54353	2.96122	5.15909		5.76329	3.97761	6.29158	5.09737	5.29105	1.87789	4.9307	3.40153	1.87262	7.14967
11.3141	8.3209	10.308	5.17423	8.92256	3.28227	9.54356	2.59248	2.97335	5.08191		5.78117	4.00322	6.23038	5.00769	5.32197	1.96672	5.00885	3.31609	1.86544	7.1435
11.2538	8.2462	10.3233	5.234	9.07392	3.29258	9.51592	2.61541	3.05814	5.18425		5.9056	3.9865	6.2821	5.05818	5.33654	1.94006	5.12017	3.38367	1.88621	7.14724
11.2091	8.29469	10.4089	5.27284	9.18297	3.47511	9.57984	2.69339	3.12585	5.18578		5.75078	4.11387	6.29426	5.15635	5.37422	1.95919	5.08443	3.47251	1.9316	7.23229
11.1285	8.25379	10.4676	5.31416	9.16931	3.49113	9.52639	2.74932	3.19479	5.18603		5.9767	4.08722	6.2671	5.12078	5.43281	2.03183	5.04125	3.37628	1.94802	7.24335
11.0469	8.26674	10.5311	5.37508	9.12897	3.56985	9.62661	2.80992	3.17146	5.23567		6.16592	4.12804	6.28321	5.15787	5.45937	2.01486	5.20833	3.52351	1.90796	7.23814
11.0132	8.13964	10.598	5.36068	9.21335	3.56145	9.55618	2.87865	3.21857	5.45478		6.24557	4.09969	6.27005	5.2051	5.49002	2.05928	5.21867	3.51751	1.92362	7.30507
10.9813	8.27518	10.5206	5.41437	9.32485	3.70363	9.60438	2.922	3.2857	5.39173		6.22208	4.11992	6.31501	5.20156	5.4915	2.10307	5.12097	3.57835	1.9417	7.31563
11.0139	8.24897	10.632	5.44995	9.39354	3.74473	9.59684	2.98709	3.36457	5.46338		6.28529	4.08581	6.31721	5.23604	5.57013	2.14513	5.25358	3.60529	1.9696	7.35016
10.932	8.28968	10.6678	5.50449	9.45062	3.86177	9.62828	3.0345	3.38983	5.58335		6.25507	4.13675	6.30288	5.26493	5.54035	2.1611	5.27676	3.55452	1.98669	7.4485
10.8543	8.1623	10.6831	5.57113	9.46306	4.03112	9.63245	3.07896	3.47593	5.64091		6.38736	4.12564	6.24707	5.25862	5.63075	2.19562	5.25913	3.59657	1.98526	7.35449
10.8374	8.26885	10.634	5.58479	9.4581	4.02634	9.6769	3.19544	3.52945	5.8167		6.28555	4.10464	6.22842	5.31069	5.61179	2.13075	5.17916	3.58792	1.99516	7.32247
10.7878	8.10286	10.6415	5.60521	9.46195	4.12065	9.69226	3.24969	3.64043	5.9173		6.48856	4.16415	6.29169	5.29293	5.67072	2.23591	5.24995	3.63154	1.99223	7.4364
10.765	8.14967	10.6117	5.74066	9.54209	4.21004	9.86369	3.30922	3.62651	5.98741		6.51637	4.17582	6.33963	5.33688	5.66662	2.21232	5.32519	3.74495	1.99004	7.43544
10.6387	8.09075	10.627	5.68232	9.64376	4.30428	9.8985	3.40557	3.67937	6.27142		6.36565	4.17335	6.31408	5.34921	5.69544	2.22641	5.30615	3.66116	1.98589	7.41675
10.6858	8.14263	10.7135	5.83419	9.68585	4.37447	9.78715	3.48788	3.73422	6.11733		6.54166	4.20588	6.34997	5.3201	5.70003	2.22023	5.34621	3.73345	1.98681	7.49733
10.6241	8.0792	10.5747	5.85768	9.64222	4.45051	9.9681	3.55545	3.84623	6.16481		6.53868	4.1662	6.3943	5.39649	5.77722	2.20586	5.42898	3.68511	1.98379	7.48005
10.5474	8.05813	10.7028	5.89903	9.635	4.61096	9.94828	3.57713	3.92523	6.39356		6.63488	4.23671	6.37845	5.32846	5.77776	2.24481	5.34743	3.7846	2.01764	7.56589
10.4802	8.06434	10.5488	5.92444	9.60909	4.58834	9.95702	3.65685	4.00189	6.35013		6.42282	4.32111	6.37969	5.43496	5.80718	2.21165	5.31307	3.77554	2.04586	7.54124
10.4915	8.09543	10.7262	6.05669	9.68721	4.74223	10.0585	3.79006	4.07516	6.2711		6.56103	4.29287	6.36428	5.45758	5.81717	2.21442	5.41418	3.82298	2.03362	7.60737
10.4269	7.8785	10.7168	6.02522	9.70774	4.91249	10.0736	3.87159	4.20921	6.41904		6.43767	4.32587	6.41161	5.42828	5.83252	2.15821	5.42036	3.87674	2.05557	7.57726
10.4616	8.08121	10.7776	6.01142	9.76213	4.97288	10.19	3.97174	4.29297	6.48704		6.69358	4.28001	6.49519	5.48257	5.81736	2.15577	5.32569	3.92684	2.05299	7.65037
10.408	8.06263	10.727	6.21834	9.73845	4.91423	10.2698	4.06043	4.28455	6.57141		6.70489	4.25929	6.42492	5.4489	5.84258	2.13693	5.40395	3.9352	2.04441	7.60442
10.3826	8.00117	10.8473	6.13552	9.78398	5.00159	10.1631	4.15515	4.45598	6.80491		6.57367	4.27014	6.3987	5.35878	5.90947	2.07449	5.47522	3.95621	2.04425	7.66958
10.3459	8.01089	10.8003	6.22651	9.81278	5.16087	10.2136	4.29285	4.55118	6.80443		6.55544	4.23334	6.38184	5.56384	5.91746	2.17272	5.49427	3.95195	2.04619	7.6791
10.3293	7.9566	10.8467	6.33286	9.75978	5.20052	10.2781	4.35733	4.608	6.81277		6.68931	4.38433	6.52291	5.4417	5.90351	2.203	5.45666	3.98973	2.04124	7.68016
10.3675	7.93953	10.8473	6.39133	9.74431	5.28508	10.2854	4.46314	4.72722	6.98753		6.67325	4.34879	6.45094	5.45782	6.01369	2.24765	5.48096	4.07426	2.07815	7.67899
10.2504	7.95693	10.7253	6.31347	9.80027	5.39807	10.4028	4.60883	4.84363	7.16594		6.5311	4.37527	6.52944	5.4003	5.97718	2.22316	5.49456	4.00051	2.15429	7.6242
10.2797	7.92959	10.8249	6.46525	9.77351	5.48278	10.4096	4.6006	4.90538	7.20147		6.71051	4.37596	6.57787	5.49748	5.99622	2.21768	5.51738	4.05776	2.18962	7.72996
10.1913	7.91205	10.8774	6.50788	9.79054	5.5411	10.4517	4.73864	4.9444	7.16285		6.7402	4.33378	6.47804	5.61138	6.01678	2.2384	5.53748	4.08709	2.19701	7.70866
10.1954	7.90329	10.7364	6.52106	9.82811	5.57784	10.5068	4.7964	5.01043	7.24548		6.8153	4.33828	6.4534	5.51734	6.06846	2.27825	5.49528	4.2344	2.21573	7.68123
10.1459	7.86176	10.8463	6.51426	9.8044	5.69927	10.581	4.97431	5.14981	7.4894		6.67934	4.37987	6.48339	5.52935	6.03042	2.25171	5.47309	4.10499	2.23797	7.75985
10.1342	7.90632	10.8726	6.54321	9.81815	5.67043	10.5883	5.01485	5.25931	7.39102		6.77789	4.37857	6.57981	5.55891	6.10297	2.25465	5.45204	4.17023	2.26449	7.81882
10.1112	7.86458	10.7529	6.6881	9.89749	5.83136	10.6572	5.1437	5.36255	7.67661		6.90725	4.37149	6.53889	5.55893	6.0736	2.24371	5.48337	4.16956	2.29097	7.81601
10.0844	7.81618	10.8449	6.72453	9.87676	5.75118	10.6621	5.30847	5.53641	7.81008		6.92401	4.40293	6.49307	5.62118	6.14074	2.27739	5.43484	4.21052	2.33229	7.6977
10.0518	7.78697	10.8565	6.74203	9.94437	5.92059	10.6088	5.35382	5.59896	7.90249		6.85941	4.38732	6.57123	5.49246	6.12218	2.27956	5.55222	4.19431	2.35975	7.83056
10.0793	7.737	10.8069	6.83175	9.9549	5.93783	10.5565	5.47562	5.74489	7.72245		6.94294	4.41791	6.46983	5.5812	6.16999	2.29512	5.61788	4.24939	2.41503	7.86019
10.0083	7.72329	10.7599	6.91074	9.93697	6.12495	10.5671	5.62357	5.75464	7.70981		6.77142	4.3795	6.53243	5.58412	6.17851	2.3033	5.53502	4.19017	2.41255	7.78442
9.96285	7.71219	10.9097	6.93908	9.93919	6.01588	10.6858	5.68521	5.96919	8.12651		6.90868	4.4205	6.60184	5.54027	6.19566	2.30185	5.53675	4.27729	2.43158	7.8733
9.91021	7.72267	10.9493	6.99984	9.98433	6.2313	10.7907	5.76921	6.05823	7.8578		7.03207	4.46937	6.5298	5.58316	6.26133	2.27511	5.49024	4.29531	2.45286	7.8709
9.86347	7.68688	11.0555	7.07279	10.0115	6.0421	10.8688	5.90389	6.10851	7.94431		7.08675	4.42035	6.50959	5.49017	6.27556	2.30514	5.67137	4.29295	2.46506	7.93581
9.806	7.70212	11.0063	7.12551	9.95956	6.22628	10.949	6.02091	6.33203	7.93146		7.029	4.45993	6.6045	5.63309	6.21756	2.29304	5.57296	4.28336	2.48028	7.90009
9.84457	7.62803	11.071	7.10332	9.96153	6.23759	11.0214	6.12224	6.45589	7.88759		6.86003	4.45613	6.50275	5.63752	6.30401	2.30386	5.66883	4.30344	2.51477	7.93126
9.83749	7.56219	10.9966	7.24808	9.97363	6.3277	11.0404	6.26729	6.54042	7.85385		6.94495	4.49485	6.6652	5.64395	6.32672	2.27445	5.66408	4.36988	2.55623	7.94178
9.87949	7.61907	10.9509	7.32134	9.9957	6.3774	11.1293	6.38026	6.61197	8.01517		6.76981	4.48603	6.58947	5.70323	6.2508	2.31071	5.68236	4.30609	2.61156	7.93113
9.81095	7.63668	10.9607	7.3801	9.96171	6.41614	11.2222	6.40708	6.77595	7.83165		6.79234	4.4934	6.59199	5.69708	6.29152	2.35807	5.54898	4.42056	2.61957	8.00035
9.78201	7.59284	11.1585	7.38593	9.97616	6.33552	11.2441	6.52393	6.76413	8.42592		6.85676	4.44325	6.60294	5.82344	6.3148	2.36545	5.55182	4.40846	2.61078	8.02361
9.81033	7.60773	11.0948	7.49685	9.9102	6.52854	11.2658	6.61454	6.91549	8.41		7.15517	4.52396	6.56595	5.69665	6.36162	2.38984	5.55923	4.45837	2.61658	8.01078
9.7977	7.60938	11.0569	7.49426	9.96932	6.48203	11.3291	6.68823	7.18985	8.32551		7.16695	4.50572	6.60928	5.64783	6.36756	2.37567	5.63426	4.49129	2.64888	7.94517
9.73154	7.60212	10.984	7.48359	9.92128	6.62978	11.3725	6.76506	7.26589	8.36405		6.95281	4.5531	6.61595	5.71766	6.35239	2.41993	5.60962	4.5254	2.68907	7.94126
9.71618	7.64664	11.1228	7.57892	10.0136	6.67648	11.3599	6.87702	7.39983	8.45357		6.67316	4.55212	6.60038	5.6236	6.34028	2.49941	5.5976	4.46024	2.71525	8.08352
9.69039	7.55002	11.1172	7.63577	9.98006	6.65782	11.5696	6.98088	7.44975	8.57516		7.00252	4.51688	6.65989	5.76107	6.38693	2.57369	5.64276	4.4602	2.76686	7.98156
9.60609	7.62623	11.0971	7.67367	9.96576	6.73195	11.5153	7.05807	7.58738	8.64372		7.03513	4.50686	6.67274	5.62352	6.35186	2.62701	5.68288	4.5344	2.78373	8.08333
9.59852	7.56527	11.0269	7.70184	10.0163	6.83056	11.4857	7.09179	7.69065	8.5113		7.05103	4.55547	6.68354	5.74137	6.37998	2.68341	5.5619	4.41651	2.76887	8.09041
9.63894	7.50966	11.0234	7.73346	10.0495	6.75227	11.6206	7.2058	7.85381	8.58662		7.07134	4.5196	6.61981	5.72252	6.46101	2.63114	5.59164	4.35654	2.81595	8.01644
9.62485	7.59672	11.1096	7.65682	10.0905	6.69432	11.5744	7.3178	7.98278	8.8759		6.96108	4.55909	6.58335	5.78792	6.42943	2.64859	5.68896	4.30243	2.844	8.07927
9.61544	7.60844	11.0933	7.70726	10.0815	6.71034	11.5994	7.39488	8.06857	8.85704		7.08228	4.54819	6.62866	5.78849	6.45542	2.63427	5.66315	4.40369	2.83559	7.98635
9.63907	7.49383	11.122	7.77602	10.0438	6.88478	11.6334	7.43067	8.33379	8.91246		7.16902	4.59223	6.67296	5.80417	6.40205	2.63674	5.72166	4.35245	2.79567	8.06773
9.64912	7.51607	11.0648	7.85114	10.0333	6.86008	11.7577	7.39262	8.37248	9.15407		7.11591	4.53219	6.65054	5.85797	6.45225	2.63573	5.63673	4.36643	2.78695	8.03779
9.58355	7.5754	11.2103	7.84651	10.1017	6.84237	11.6853	7.42711	8.56655	8.85339		7.38532	4.60319	6.62241	5.79231	6.47278	2.62528	5.66171	4.45902	2.77874	8.14777
9.59341	7.53113	11.0731	8.00426	10.1049	6.89392	11.7355	7.55881	8.61224	8.91103		7.10779	4.57685	6.71151	5.74676	6.47421	2.68845	5.64928	4.43659	2.73939	8.08175
9.58914	7.57847	11.1348	7.88564	10.1115	6.90003	11.7225	7.67171	8.81119	8.81227		7.10648	4.61466	6.75019	5.86228	6.50703	2.71203	5.69439	4.36711	2.77825	8.09049
9.61745	7.46108	11.1117	7.94745	10.1123	6.97708	11.9069	7.70512	8.93036	8.78101		7.221	4.568	6.65859	5.88634	6.5084	2.83846	5.57706	4.37422	2.81243	8.16008
9.524	7.50362	11.2465	7.91382	10.0955	7.02996	12.0064	7.65926	9.10741	8.71915		7.16062	4.54586	6.70701	5.90881	6.4816	2.90091	5.61575	4.38716	2.79638	8.15539
9.50414	7.57956	11.1385	7.95325	10.0869	7.04878	11.9057	7.66536	9.22992	8.91059		7.13356	4.59193	6.71684	5.8245	6.51715	2.90168	5.77231	4.44429	2.82509	8.21443
9.44767	7.5707	11.1543	7.88739	10.119	7.11433	11.9102	7.63637	9.45774	8.77227		6.9144	4.59895	6.77373	5.83847	6.57853	2.8512	5.69536	4.43109	2.85075	8.1883
9.48094	7.59543	11.0883	7.93439	10.0632	7.23266	12.0091	7.68122	9.46608	8.97428		7.12689	4.60185	6.71385	5.94101	6.52288	2.94392	5.74819	4.4659	2.84138	8.15451
9.43811	7.54177	11.1721	7.95038	10.1383	7.23968	12.1348	7.64745	9.5038	8.76071		7.17831	4.63069	6.77603	5.87505	6.58072	2.94712	5.7536	4.49528	2.81765	8.24165
9.43683	7.59683	11.1593	7.91945	10.1641	7.2351	12.1679	7.46129	9.73194	8.88773		7.17209	4.56766	6.68492	5.95211	6.57279	2.99259	5.7771	4.41415	2.79926	8.19383
9.44697	7.49172	11.1023	7.90085	10.2164	7.28425	12.259	7.3268	9.81877	9.12318		6.98843	4.62209	6.67424	5.80792	6.66161	3.06127	5.73783	4.41249	2.78975	8.25438
9.42956	7.62417	11.1298	7.89907	10.1095	7.09703	12.4034	7.48473	9.93129	8.92247		7.07485	4.64713	6.77479	5.92367	6.63708	3.07431	5.77566	4.40361	2.80504	8.13468
9.46503	7.60689	11.1082	7.99573	10.0931	7.30087	12.3461	7.53547	10.1307	8.74215		7.01049	4.66316	6.75225	5.88286	6.68325	3.06804	5.75982	4.40672	2.81089	8.14248
9.46091	7.59079	11.1652	7.9903	10.1068	7.32591	12.4661	7.63914	10.0958	9.02267		7.22593	4.59654	6.72779	6.00535	6.6774	3.1197	5.71793	4.34931	2.8218	8.23635
9.43284	7.6342	11.0833	7.89048	10.049	7.45118	12.5236	7.78639	10.1676	9.24681		7.10763	4.67716	6.74561	5.98485	6.66712	3.05532	5.76883	4.34982	2.84018	8.22512
9.44094	7.61807	11.1292	7.85137	10.1291	7.28538	12.5215	7.84095	10.3965	9.11008		7.20456	4.65291	6.73588	5.9815	6.75195	3.06974	5.68133	4.45157	2.84392	8.25061
9.41934	7.67491	10.9624	7.79306	10.0903	7.3999	12.5374	7.76103	10.3073	9.14222		7.0381	4.69564	6.74088	5.90156	6.75884	3.13746	5.68087	4.48696	2.85279	8.18487
9.42077	7.67744	11.0161	7.92422	10.1096	7.50122	12.4871	7.74326	10.4206	9.35278		7.22365	4.64659	6.73371	5.90451	6.78146	3.15485	5.68064	4.43292	2.87828	8.2282
9.39739	7.64209	11.1216	7.84505	10.0755	7.44969	12.6022	7.97006	10.6243	9.57648		7.09073	4.68441	6.65401	5.9881	6.77801	3.12179	5.74343	4.44316	2.89281	8.27533
9.33525	7.74933	11.027	7.71715	10.1043	7.49225	12.6009	8.12611	10.6683	9.21537		7.29015	4.67606	6.81597	5.95189	6.76707	3.21077	5.77684	4.47631	2.93947	8.20646
9.3042	7.68494	11.087	7.78493	10.1232	7.49328	12.6362	8.26923	10.6467	9.39378		7.14893	4.66525	6.71566	6.01748	6.77175	3.22267	5.7756	4.43417	2.92215	8.20106
9.33799	7.73987	11.1583	7.78317	10.1418	7.47816	12.6686	8.47606	10.792	9.27934		7.12019	4.71461	6.74273	6.0613	6.79232	3.30627	5.72649	4.43692	2.91054	8.31101
9.261	7.70513	11.215	7.79214	10.1798	7.4728	12.6876	8.37322	10.8132	9.285		6.99413	4.68732	6.71161	6.05267	6.73566	3.38662	5.74187	4.3991	2.92718	8.34471
9.19657	7.73562	10.9068	7.73141	10.0956	7.49186	12.7816	8.52348	10.8324	9.17571		7.04517	4.72995	6.70392	5.99729	6.76095	3.42347	5.73355	4.59539	2.94429	8.21913
9.17835	7.73243	11.1349	7.7629	10.1252	7.57441	12.8911	8.6114	10.947	9.1163		6.8795	4.71969	6.72977	6.07938	6.83185	3.34378	5.68788	4.42089	2.99889	8.23964
9.17124	7.89558	11.0794	7.75405	10.1995	7.50019	12.7984	8.81918	10.9674	9.25681		7.31238	4.70707	6.75048	5.99526	6.76754	3.37067	5.63955	4.53555	3.04861	8.27051
9.09011	7.87935	11.0158	7.72459	10.1616	7.67688	12.8562	8.82315	10.9314	9.43964		6.77326	4.68744	6.75532	6.01518	6.73998	3.42527	5.66314	4.4723	3.06565	8.32624
9.10561	7.91626	11.151	7.77582	10.1379	7.65389	13.0821	8.93798	11.0274	9.30063		6.85472	4.71708	6.77692	6.1066	6.70556	3.42649	5.60528	4.52852	3.10307	8.3022
9.18045	7.90282	11.0057	7.75579	10.0611	7.59616	13.119	8.88891	11.1951	9.32082		6.99536	4.75182	6.70593	6.0571	6.73057	3.50019	5.6892	4.43596	3.10079	8.28006
9.24736	7.98996	11.0498	7.70971	10.1387	7.57349	13.1652	8.76812	10.9757	9.46894		6.78989	4.74034	6.80533	5.91538	6.72805	3.49879	5.77248	4.56253	3.14166	8.38824
9.22165	7.89933	11.0764	7.73942	10.1521	7.76364	13.1105	8.82698	11.1406	9.25571		7.08655	4.77993	6.71906	6.13833	6.75359	3.54589	5.65612	4.59653	3.16671	8.19431
9.23172	7.96171	11.0015	7.69836	10.1643	7.58041	13.2312	8.96778	11.199	9.66106		7.36279	4.76562	6.70843	5.97744	6.69558	3.52638	5.76694	4.50127	3.14852	8.3589
9.18003	8.04349	11.0662	7.74228	10.1242	7.84655	13.2032	8.82285	11.1343	9.60909		7.25732	4.75667	6.75848	6.06742	6.76778	3.57439	5.70129	4.52492	3.17305	8.29345
9.25362	8.09939	11.1956	7.73382	10.1562	7.82543	13.2417	8.91441	11.1564	9.24459		7.08744	4.80131	6.74563	6.09068	6.72591	3.59438	5.67873	4.64887	3.19642	8.16713
9.19941	8.05766	11.0466	7.70024	10.2056	7.83885	13.3678	9.00839	11.2348	9.4243		7.09612	4.7712	6.73222	6.07653	6.77973	3.59958	5.71762	4.57327	3.2225	8.36437
9.16488	8.18596	11.0599	7.80533	10.1008	7.87234	13.3077	8.96303	11.1427	9.54283		7.32821	4.75507	6.74363	6.16105	6.72561	3.60704	5.70949	4.54261	3.25312	8.35482
9.21239	8.21101	11.1747	7.80199	10.1186	7.86378	13.3544	8.89871	11.1395	9.48072		7.15348	4.80764	6.69915	6.13212	6.76056	3.64946	5.70545	4.67181	3.2642	8.36453
9.18686	8.14332	11.0782	7.86685	10.1579	7.94141	13.3147	8.97237	11.3162	9.57217		7.19984	4.83856	6.73677	6.20251	6.7943	3.62049	5.7326	4.58042	3.26627	8.37908
9.18148	8.22236	11.2252	7.77317	10.091	7.88902	13.3566	8.89999	11.1905	9.8142		7.21599	4.77978	6.73847	6.1614	6.81265	3.68391	5.7005	4.5675	3.2738	8.43823
9.15572	8.33778	11.2455	7.93756	10.2034	8.04179	13.2216	8.87392	11.3823	9.68694		6.93606	4.7967	6.7092	6.0691	6.7611	3.66782	5.72609	4.62875	3.30552	8.43432
9.10248	8.34613	11.1984	7.94872	10.1702	8.07091	13.2628	8.91901	11.2422	9.34151		6.78014	4.80402	6.7385	6.06663	6.78206	3.65343	5.75006	4.68149	3.31947	8.3783
9.06871	8.26777	11.2516	7.96419	10.2118	8.05193	13.4062	8.79817	11.2704	9.60039		7.02783	4.7714	6.7067	6.27093	6.79053	3.72893	5.79138	4.62214	3.28645	8.34869
9.07226	8.35924	11.2054	8.06047	10.1119	8.08012	13.3764	8.83106	11.2247	9.81366		7.20314	4.77351	6.76859	6.30332	6.74697	3.67816	5.77072	4.6126	3.31457	8.4422
9.04456	8.42434	11.1596	8.04058	10.1879	7.99525	13.4329	8.97328	11.3067	9.63252		7.29743	4.80127	6.76819	6.10718	6.81702	3.71804	5.78404	4.67745	3.35274	8.40503
9.03585	8.48132	11.1556	7.81535	10.0297	8.11273	13.5784	8.99684	11.3596	9.83931		6.9625	4.83721	6.74279	6.1931	6.78599	3.74542	5.74008	4.65797	3.36223	8.34218
9.01584	8.45527	11.1941	7.68716	10.1922	8.11186	13.5501	9.02451	11.2203	9.54059		6.88849	4.8405	6.7882	6.18618	6.8156	3.83026	5.80116	4.67686	3.3899	8.4107
9.00106	8.51926	11.161	7.93012	10.1197	8.03467	13.5548	9.03675	11.2971	9.7429		7.06823	4.83405	6.74923	6.17971	6.8049	3.96568	5.77002	4.69062	3.42171	8.4375
8.9944	8.50581	11.0584	7.97735	10.2563	8.11781	13.5696	8.93724	11.2978	10.0534		7.21319	4.83174	6.79955	6.24616	6.84019	3.97713	5.77821	4.70414	3.4451	8.41451
9.05189	8.54167	11.1278	7.69774	10.1413	8.23871	13.6275	9.13961	11.3937	9.7157		6.85177	4.82164	6.80251	6.22261	6.81126	4.04481	5.75485	4.66134	3.44272	8.39884
9.06452	8.5737	11.055	7.74937	10.2425	8.26008	13.4834	9.0586	11.2921	9.61666		6.99857	4.84007	6.7171	6.2306	6.80666	4.02651	5.76816	4.69123	3.45727	8.42082
9.01971	8.59547	10.9951	8.02755	10.1994	8.38129	13.6651	9.09429	11.5131	9.65858		7.1358	4.90129	6.69094	6.20444	6.85498	3.93263	5.73414	4.70418	3.48113	8.35347
9.03858	8.64351	11.0863	7.82149	10.1872	8.3497	13.7911	8.99813	11.3928	9.65996		6.93742	4.84251	6.74754	6.31191	6.85991	3.91183	5.76693	4.72903	3.53366	8.44745
9.0101	8.68802	11.0413	7.67258	10.2653	8.34899	13.6898	9.1442	11.5206	9.83436		7.00481	4.87843	6.63535	6.25127	6.86525	3.93184	5.76933	4.72714	3.50904	8.47572
9.05626	8.67869	11.2157	7.74157	10.2033	8.41316	13.7955	9.14141	11.4061	9.87744		7.18914	4.89299	6.71353	6.23422	6.8235	4.01241	5.77315	4.70568	3.56674	8.42322
9.03992	8.69754	11.0303	7.69575	10.2494	8.47183	13.8232	8.98186	11.3985	9.73724		6.94384	4.9099	6.84349	6.34158	6.84778	4.00582	5.76677	4.67394	3.65533	8.30643
9.02717	8.70337	11.0918	7.54308	10.2427	8.46223	13.8482	9.15462	11.4835	9.56438		6.76888	4.86117	6.72126	6.22073	6.88502	4.00534	5.7142	4.72672	3.65961	8.40508
8.94926	8.74864	11.1281	7.63716	10.2084	8.53647	13.9241	9.17985	11.5094	9.62994		7.11955	4.87347	6.71948	6.3085	6.90088	4.15886	5.77704	4.75277	3.6769	8.3636
9.00175	8.86292	11.1662	7.85013	10.2146	8.39099	13.8344	9.14032	11.3122	9.62853		7.05739	4.8363	6.74219	6.298	6.90325	4.10127	5.74811	4.73865	3.71608	8.43294
8.96621	8.83101	10.9907	7.76453	10.2396	8.59328	13.8921	9.20728	11.375	9.74817		6.9835	4.96144	6.71962	6.17961	6.86671	4.07781	5.75935	4.72886	3.77945	8.32589
8.93713	8.80868	11.1119	7.6456	10.251	8.53741	13.9308	8.99186	11.4139	9.90492		7.12983	4.90473	6.71705	6.29177	6.88836	4.04402	5.79866	4.79439	3.79519	8.43908
8.87652	8.86822	11.038	7.69937	10.1914	8.7331	13.9484	8.97207	11.4739	9.79865		7.15042	4.92728	6.68328	6.30671	6.87533	4.10607	5.72762	4.73229	3.84938	8.48229
8.89416	8.77898	11.0189	7.91961	10.202	8.70576	13.8856	9.20833	11.3532	9.90276		7.10872	4.8977	6.79472	6.36844	6.83812	4.05363	5.76499	4.88244	3.81253	8.39717
8.87364	8.88683	11.1058	7.70141	10.1746	8.7368	13.8949	9.06619	11.3934	9.95321		7.01548	4.87201	6.71025	6.63804	6.88197	4.09736	5.84817	4.80253	3.90808	8.43177
8.89778	8.92237	10.9557	7.59697	10.1578	8.75014	13.9336	9.13932	11.4046	10.1006		7.16453	4.98984	6.75104	6.59768	6.88767	4.17447	5.80824	4.78501	3.948	8.36635
8.94536	8.96638	10.9729	7.81916	10.2657	8.86161	13.8546	9.22739	11.456	9.83476		6.94922	4.92912	6.67721	6.5645	6.8657	4.20588	5.83556	4.81453	4.07868	8.46265
8.91	8.97256	10.9396	7.84187	10.2082	8.83698	13.8887	9.04172	11.4717	10.0632		7.01961	4.96181	6.65668	6.82498	6.89106	4.19019	5.79245	4.89845	4.13438	8.50711
8.9879	9.06706	11.0891	7.84762	10.2006	8.88579	13.8006	9.30232	11.4608	9.92991		7.06748	4.92216	6.76789	6.55305	6.90606	4.24858	5.79047	4.84072	4.15912	8.42822
9.02783	9.10562	10.9858	7.93308	10.1747	8.78832	13.9014	9.34202	11.4538	10.0813		6.69854	4.89407	6.76548	6.70862	6.86531	4.20117	5.76141	4.83934	4.192	8.3872
8.96529	8.96436	10.9693	7.95612	10.25	8.96694	13.9217	9.22356	11.4533	10.0214		6.92344	5.02286	6.69321	6.73607	6.87879	4.35483	5.81067	4.89161	4.18008	8.41675
8.93861	9.03581	10.9866	7.76963	10.2542	8.919	13.852	9.25099	11.4029	10.1332		6.88091	4.9779	6.69851	6.50557	6.92741	4.36469	5.82761	4.97769	4.16352	8.49146
8.99471	9.05515	10.9785	7.94264	10.2526	8.99984	13.8568	9.11922	11.5355	10.1719		6.81421	4.92485	6.62464	6.69948	6.87608	4.33115	5.87116	4.81217	4.1778	8.4801
8.94277	9.18333	11.1255	7.94189	10.1842	9.13047	13.658	9.34024	11.6093	9.98538		6.75319	4.97509	6.73282	6.67073	6.89563	4.42707	5.77548	4.90307	4.31687	8.53117
8.90974	9.21512	10.9568	7.85155	10.1818	9.1727	13.5555	9.25638	11.6058	10.021		6.90442	4.94802	6.68607	6.73019	6.89345	4.52936	5.7572	4.90492	4.29551	8.49856
8.86255	9.24318	11.041	7.60763	10.1781	9.08689	13.7955	9.11193	11.5903	10.4259		7.25484	4.93035	6.64012	6.63597	6.86612	4.563	5.87718	4.84983	4.29538	8.52075
8.88241	9.25634	11.0188	7.84382	10.1949	9.08868	13.7364	9.4679	11.6712	10.2432		6.87446	4.99231	6.6107	6.5883	6.91343	4.63859	5.79281	4.81738	4.30145	8.49486
8.86696	9.19647	11.0351	7.99893	10.2072	9.16971	13.8366	9.46191	11.6	10.2167		6.79867	4.92167	6.69851	6.63947	6.94057	4.64185	5.80887	4.89979	4.23171	8.47303
8.90576	9.19723	11.0872	7.53103	10.1969	9.17312	13.9181	9.38961	11.6472	10.2234		6.96825	4.9813	6.74044	6.57384	6.9468	4.57459	5.80005	4.94199	4.2178	8.51482
8.81228	9.36486	10.9718	7.55406	10.2188	9.24736	13.8385	9.57522	11.741	10.5654		6.97495	5.00656	6.69271	6.63424	6.91975	4.52146	5.75483	4.90181	4.32237	8.5022
8.82071	9.2809	10.8706	7.83847	10.3111	9.20319	13.9068	9.35651	11.5703	10.1918		6.92642	4.98525	6.61241	6.65252	6.93589	4.49123	5.76996	4.92339	4.33195	8.51574
8.83529	9.15206	10.9599	7.75821	10.2528	9.29137	13.8636	9.54182	11.5865	10.2029		7.03086	5.02675	6.60188	6.60879	6.94991	4.6091	5.78831	4.91001	4.30794	8.54654
8.81171	9.4488	11.0053	7.5876	10.067	9.41543	13.8366	9.39034	11.5623	10.5219		7.12467	5.02205	6.69198	6.86288	6.97637	4.64511	5.77995	4.83472	4.35766	8.55433
8.81534	9.29153	10.9651	7.70544	10.0581	9.29594	13.8884	9.42997	11.7724	10.5386		6.83652	4.98703	6.65749	6.78814	6.90279	4.67992	5.79826	4.97758	4.36095	8.51071
8.81542	9.41185	11.0192	7.68457	10.2085	9.47045	13.9953	9.62397	11.5194	9.82513		7.21017	4.969	6.60604	6.60049	6.98889	4.60808	5.77553	4.94079	4.41678	8.50998
8.78253	9.27317	11.021	7.39977	10.2746	9.48397	13.8144	9.60818	11.7119	10.3308		6.97019	5.01397	6.5786	6.7276	6.91865	4.56908	5.85389	4.91777	4.43794	8.51862
8.7863	9.29121	10.8766	7.74239	10.1846	9.42603	13.7479	9.55945	11.7128	10.3097		7.05861	5.06876	6.59856	6.58884	6.9314	4.61436	5.83633	4.97167	4.46061	8.51123
8.78474	9.48994	10.9016	7.8472	10.258	9.47722	13.6082	9.55476	11.6744	10.2545		6.90015	5.05562	6.59973	6.64889	6.94111	4.66675	5.82962	4.9235	4.57674	8.52001
8.77192	9.43358	10.8598	7.54605	10.2503	9.49984	13.5825	9.66846	11.7324	10.3365		6.81101	5.06482	6.58437	6.7489	6.88405	4.69895	5.91486	4.90431	4.68226	8.55345
8.76197	9.48188	10.9728	7.47598	10.2279	9.4365	13.5941	9.623	11.7628	10.3386		6.97344	5.01471	6.55886	6.65675	6.975	4.69374	5.79877	4.95611	4.65287	8.46244
8.82617	9.37749	10.9579	7.68699	10.2538	9.56019	13.5432	9.53644	11.7517	10.1932		7.09486	5.0302	6.60377	6.60994	6.93787	4.77468	5.88109	4.9556	4.6447	8.5243
8.79773	9.49645	11.0201	7.64837	10.1897	9.56777	13.6551	9.64805	11.6657	9.97906		6.81982	5.03914	6.5972	6.62879	6.99033	4.82614	5.81611	4.91293	4.7005	8.51332
8.76831	9.60041	10.9354	7.53145	10.2365	9.57955	13.6937	9.56225	11.693	10.0682		7.21477	5.00384	6.64504	6.63013	6.90721	4.77011	5.82458	4.97394	4.66517	8.47097
8.76239	9.55689	10.9564	7.66992	10.1887	9.65333	13.7448	9.58608	11.8151	10.4232		7.05852	4.99671	6.50139	6.54853	6.94423	4.73242	5.82134	5.02028	4.75642	8.47615
8.76791	9.33641	11.0051	7.65482	10.2792	9.6445	13.8834	9.56897	11.698	10.0182		6.95046	5.0467	6.65494	6.58019	7.00589	4.72813	5.8116	5.0067	4.71003	8.47409
8.71154	9.58535	10.9558	7.53745	10.2764	9.62707	13.8565	9.67249	11.5698	10.5351		6.93202	4.9749	6.50334	6.72709	6.95225	4.78641	5.8116	5.01094	4.75948	8.59927
8.66811	9.50892	10.989	7.51957	10.3212	9.60584	13.746	9.44594	11.72	10.3691		7.12768	5.06	6.63595	6.69548	6.99316	4.809	5.85194	5.06171	4.75047	8.41629
8.74283	9.56286	10.8954	7.61311	10.2032	9.84436	13.5838	9.64621	11.7881	10.2738		7.00398	5.01416	6.62271	6.61555	7.01744	4.87175	5.82242	4.98799	4.79032	8.49189
8.72861	9.5422	10.9317	7.44347	10.3787	9.80383	13.78	9.62918	11.6427	10.185		7.02381	4.9747	6.65729	6.78247	6.99852	4.96636	5.80111	4.98203	4.81706	8.5779
8.73822	9.45177	11.0468	7.43969	10.3255	9.745	13.7231	9.59131	11.7346	10.5009		7.26379	5.01015	6.61779	6.61536	7.03454	5.03591	5.81369	5.0547	4.80766	8.55816
8.74284	9.76083	10.9594	7.50778	10.3029	9.88101	13.6673	9.59802	11.8679	10.3079		6.8898	5.03955	6.53498	6.73278	6.99809	4.95113	5.90167	5.0197	4.77135	8.53309
8.78117	9.70322	10.9779	7.44519	10.2613	10.0591	13.5898	9.58748	11.7901	10.2369		7.10806	5.03434	6.53423	6.677	7.00222	4.99481	5.72582	5.00058	4.81429	8.57273
8.67384	9.57447	11.0804	7.31307	10.2986	9.83438	13.7045	9.5579	11.7713	10.0884		7.01154	5.00749	6.54705	6.66552	7.02617	5.01775	5.78105	5.06063	4.87549	8.48463
8.69159	9.59302	10.8692	7.41409	10.352	9.70256	13.6409	9.55032	11.9849	10.6847		6.96203	5.04912	6.52792	6.58735	7.0068	4.97959	5.7885	5.04315	4.89273	8.49601
8.70546	9.76829	10.9505	7.47782	10.3007	9.81305	13.7142	9.62454	11.8107	10.1912		6.9271	5.043	6.55962	6.5451	7.05757	5.05827	5.72629	5.05392	4.88643	8.54898
8.64774	9.78847	10.9323	7.36356	10.123	9.75508	13.5236	9.49624	11.7671	10.176		7.06199	5.09364	6.54178	6.5373	7.03411	5.05854	5.76633	5.01009	4.93843	8.53858
8.64853	9.85074	10.8563	7.40849	10.2318	9.75714	13.5769	9.50816	11.7524	10.5741		7.0588	5.10516	6.57861	6.74572	6.96809	4.97046	5.79297	5.05885	5.00849	8.52306
8.67098	9.80591	10.8011	7.45651	10.1436	9.72769	13.4047	9.41954	11.6923	10.097		6.90408	5.05225	6.53218	6.5901	6.98162	4.89377	5.8635	5.0005	4.9384	8.47709
8.64981	9.67612	10.8498	7.46225	10.2509	9.78862	13.2676	9.47257	11.5412	10.1855		6.98644	5.09664	6.55929	6.62788	7.01521	4.94782	5.75966	5.14814	4.97748	8.57533
8.66718	9.80316	10.9044	7.21761	10.2579	9.90181	13.3894	9.64707	11.7798	10.4718		7.20608	5.09692	6.6097	6.61206	7.01961	4.98594	5.85358	5.11284	5.06049	8.47016
8.63076	9.64402	10.8818	7.27221	10.2326	9.88863	13.5993	9.70955	11.6996	10.3135		6.86715	5.03701	6.57603	6.64441	6.99827	5.0115	5.72167	5.02576	5.07906	8.49359
8.70449	9.85546	10.8524	7.32234	10.1865	9.9026	13.5237	9.46442	11.8188	10.362		6.90041	5.11855	6.58769	6.53145	7.00423	5.0785	5.83912	5.1637	5.06001	8.53416
8.71352	9.75043	10.8876	7.24702	10.1926	9.87358	13.5481	9.60869	11.737	10.1742		6.76324	5.1053	6.59265	6.6956	6.99742	5.05345	5.77402	5.11756	5.08113	8.48027
8.68838	9.73983	10.8484	7.31646	10.2283	10.0624	13.5862	9.61331	11.9753	10.2292		7.01134	5.05434	6.56001	6.59765	6.98267	4.92479	5.80655	5.04264	5.16413	8.48429
8.68602	9.78824	10.8664	7.29723	10.1923	10.0415	13.579	9.58238	11.906	10.4639		6.89401	5.098	6.54047	6.65113	6.98539	4.96166	5.78601	5.0759	5.17785	8.50373
8.71126	9.82349	10.9037	7.27135	10.1631	9.72171	13.3599	9.53984	11.8055	10.3552		6.90191	5.09245	6.49699	6.53666	7.03379	4.95983	5.81914	5.20218	5.1669	8.60278
8.6674	9.8818	10.8071	7.26284	10.2109	9.91189	13.4455	9.55589	11.7234	10.4223		7.11932	5.08426	6.57466	6.45238	7.00069	4.88981	5.69634	5.11205	5.13909	8.46255
8.66559	9.89275	10.7581	7.16739	10.1111	9.89295	13.4657	9.65923	11.9369	10.3198		7.01893	5.06419	6.55326	6.71272	6.96315	4.86893	5.76403	5.08828	5.18558	8.46893
8.69461	9.77168	10.7872	7.12591	10.1761	9.98428	13.591	9.74959	11.8418	10.1463		7.09653	5.10108	6.55569	6.57933	6.98456	5.00025	5.76888	5.11376	5.15031	8.46985
8.68499	9.76396	10.9065	7.24349	10.2325	10.0479	13.3817	9.56336	12.023	10.0246		6.89593	5.05451	6.59575	6.56233	7.03036	4.9657	5.8254	5.08891	5.18534	8.54755
8.70805	9.66239	10.6953	7.20576	10.2967	9.98589	13.3041	9.84352	11.9781	10.3915		6.84828	5.04483	6.53635	6.48212	7.00292	4.99815	5.75712	5.09252	5.22804	8.58113
8.62749	9.55827	10.8448	7.25769	10.2662	9.96	13.1511	9.54265	11.7678	10.5335		6.94299	5.03921	6.56961	6.62256	7.00164	5.01948	5.76815	5.10947	5.23749	8.49989
8.67807	9.97224	10.8499	7.07572	10.2748	9.8751	13.4008	9.45526	11.8838	10.218		7.12288	5.06542	6.49743	6.60064	6.98544	5.03596	5.73856	5.05868	5.34266	8.50848
8.65323	9.83703	10.7162	7.20506	10.1861	9.87631	13.3668	9.75133	11.8544	10.2798		7.11003	5.10003	6.51582	6.53316	6.99741	5.07123	5.79562	5.10611	5.35187	8.55983
8.62923	9.80894	10.7845	7.22817	10.2194	9.99747	13.3175	9.44474	11.7911	10.4632		6.89389	5.12016	6.52431	6.56978	7.05247	5.02003	5.693	5.13543	5.30471	8.56763
8.64444	9.93691	10.7966	7.20439	10.3046	9.84245	13.2715	9.68626	11.8933	10.0777		6.91184	5.07854	6.54973	6.4638	6.95531	5.1198	5.71436	5.09013	5.33126	8.56657
8.6927	9.75435	10.7517	7.16704	10.25	9.71966	13.0228	9.61961	11.8213	10.3473		6.98286	5.08642	6.45934	6.54236	6.97243	5.19277	5.88016	5.06007	5.38261	8.49933
8.60554	9.92198	10.7558	7.13648	10.1422	9.82254	13.032	9.49201	11.8782	10.2972		6.70489	5.06637	6.54031	6.5354	6.94394	5.15687	5.81325	5.14389	5.45413	8.55657
8.63031	9.78314	10.7465	7.28726	10.1177	9.9762	13.3357	9.6514	11.7486	10.0304		6.82327	5.06031	6.51746	6.62084	7.03445	5.11697	5.71953	5.17766	5.483	8.57347
8.68073	9.99739	10.7862	7.24796	10.1647	9.84623	13.4507	9.65078	11.9374	10.167		7.01264	5.17834	6.63605	6.54556	7.04618	5.20387	5.80694	5.11678	5.4971	8.46913
8.61202	9.97959	10.7638	7.65082	10.0993	9.92383	13.4339	9.78598	11.6126	10.1918		6.96856	5.1124	6.50493	6.54476	7.01194	5.16718	5.80015	5.1906	5.46762	8.46774
8.66084	9.92821	10.8174	7.46777	10.1329	9.93395	13.6383	9.71445	11.8747	10.0628		6.75918	5.04565	6.55498	6.55057	7.04729	5.09725	5.81072	5.23621	5.4843	8.62139
8.59233	9.93924	10.8347	7.64308	10.064	10.0814	13.4267	9.5234	11.837	10.0089		6.55539	5.03599	6.55248	6.52414	7.00918	5.10953	5.72236	5.0585	5.55295	8.52222
8.65466	9.89145	10.798	7.54351	10.211	10.0034	13.3375	9.67362	11.878	10.4388		6.45973	5.05075	6.59366	6.5891	7.01732	5.18308	5.80053	5.13027	5.51227	8.55012
8.71527	10.0721	10.6642	7.94053	10.2034	10.0389	13.4513	9.62523	11.9494	10.2576		6.9631	5.09796	6.59976	6.58631	7.02755	5.09221	5.70885	5.17411	5.60315	8.54528
8.61608	9.8308	10.7837	7.67595	10.2066	9.93139	13.3277	9.91165	11.7362	10.3177		6.86648	5.08556	6.54652	6.45734	6.96599	5.20863	5.80005	5.15074	5.56645	8.47501
8.65958	10.0097	10.8254	7.73658	10.3051	9.90128	13.3207	9.68667	11.7611	10.4362		6.86948	5.09926	6.58987	6.39498	7.03734	5.16968	5.82961	5.14449	5.54034	8.58436
8.57514	9.96069	10.7445	7.79732	10.2954	9.86999	13.3397	9.7095	11.8679	10.1406		6.7854	5.07899	6.54657	6.39758	6.99389	5.25068	5.73731	5.2108	5.60648	8.54935
8.66685	10.0334	10.776	7.98161	10.1834	9.98899	13.2549	9.82661	11.9609	9.74341		6.67106	5.1159	6.49799	6.3575	7.03078	5.20599	5.78726	5.20583	5.59659	8.43887
8.56163	10.0295	10.8399	7.4049	10.2456	10.0254	13.2449	9.84176	11.8943	9.9275		6.82914	5.11598	6.57755	6.49702	7.03893	5.16609	5.77299	5.17317	5.6083	8.52449
8.60346	9.91034	10.7001	7.84563	10.1703	10.0305	13.3439	9.75661	11.9606	10.4952		7.08557	5.11739	6.49329	6.41871	7.04832	5.09145	5.76561	5.23354	5.63527	8.38439
8.65264	9.97459	10.7915	8.12075	10.2578	10.075	13.4321	9.79017	11.7864	10.3252		6.99848	5.11486	6.53271	6.35899	7.02633	5.1525	5.77785	5.24078	5.59493	8.52941
8.56793	10.0642	10.6884	7.98796	10.2547	9.98646	13.3844	9.87974	11.9101	9.69685		6.94353	5.13374	6.55002	6.61839	7.07106	5.18423	5.76567	5.1644	5.59206	8.54562
8.66919	9.91395	10.6384	7.85061	10.2541	10.0253	13.3301	9.69882	11.9685	10.1532		6.9264	5.08388	6.54206	6.58719	7.07343	5.12648	5.74662	5.18582	5.6568	8.60577
8.64846	9.93074	10.6885	7.7417	10.2542	9.97963	13.5088	9.72446	11.8945	10.067		6.70363	5.10359	6.5866	6.58125	7.0579	5.11827	5.81336	5.16592	5.65214	8.54775
8.61125	10.0085	10.8292	8.12043	10.1818	9.92664	13.4371	9.78127	11.843	10.215		6.65909	5.09856	6.55715	6.42171	7.04321	5.19586	5.70589	5.16958	5.66441	8.59219
8.689	10.0422	10.6947	7.66732	10.2685	9.97553	13.3362	9.80832	11.8534	10.2333		6.73163	5.08879	6.56443	6.55193	7.08129	5.24776	5.78948	5.16796	5.65073	8.61228
8.65265	10.0666	10.7156	7.88718	10.2907	10.091	13.408	9.66231	12.0587	10.2591		6.86847	5.09675	6.55845	6.53325	7.10478	5.29004	5.69686	5.16802	5.74185	8.59193
8.64885	10.074	10.6225	8.1161	10.2574	10.0097	13.3764	9.91729	11.6957	10.0305		6.64955	5.15491	6.62297	6.54813	7.0197	5.30674	5.76752	5.20883	5.70513	8.49983
8.57988	9.94135	10.59	7.95724	10.2353	9.94934	13.4166	9.70906	11.9522	10.0912		6.70278	5.12205	6.62109	6.47523	7.10775	5.41522	5.78576	5.1646	5.77358	8.5108
8.62504	10.0355	10.6899	7.90048	10.1844	10.045	13.5102	9.8569	11.9008	10.0306		6.61313	5.15137	6.58286	6.51249	7.08743	5.40275	5.79202	5.16488	5.75525	8.47405
8.5801	9.92151	10.6739	7.86704	10.1779	9.96767	13.5775	9.82188	11.8675	9.82597		6.80193	5.12571	6.54803	6.48585	7.06694	5.45108	5.70309	5.18235	5.8218	8.61869
8.58805	10.017	10.5604	8.07888	10.127	9.89372	13.5829	9.79859	11.919	9.90428		6.87358	5.15311	6.54659	6.48669	7.13582	5.45528	5.75374	5.1814	5.84946	8.50042
8.64778	10.0216	10.6548	7.58829	10.3281	9.83332	13.5209	9.82026	12.0188	9.99123		6.59832	5.16436	6.50872	6.47374	7.08093	5.405	5.70444	5.174	5.79254	8.53143
8.6604	10.0358	10.6349	7.78941	10.2363	9.78745	13.5767	9.64544	11.8667	10.0688		6.9077	5.15331	6.53548	6.45099	7.07898	5.32599	5.68863	5.18842	5.84094	8.56809
8.62564	9.99648	10.6744	8.06773	10.202	9.78838	13.6299	9.74222	11.7984	9.61616		6.71396	5.06485	6.49484	6.45878	7.06619	5.55972	5.80133	5.24839	5.94872	8.49655
8.63256	10.0607	10.6812	7.85346	10.2036	9.87397	13.5048	9.91739	11.9411	9.7298		7.10831	5.1071	6.59734	6.44477	7.10706	5.56519	5.66805	5.14488	5.93896	8.4623
8.69024	9.95012	10.6493	7.79681	10.2653	9.8859	13.6387	9.72736	11.9698	9.82274		6.77753	5.09513	6.62437	6.37966	7.03114	5.56576	5.83533	5.24956	5.94332	8.60241
8.58709	10.0655	10.6037	7.68738	10.2005	9.81289	13.7666	9.52591	11.7987	9.64038		7.09506	5.10981	6.66153	6.4542	7.0565	5.55869	5.6987	5.17695	5.86094	8.58537
8.51918	10.0113	10.5782	7.68132	10.1855	10.0495	13.6291	9.85758	11.9826	9.76808		7.05597	5.11444	6.51163	6.4664	7.01304	5.5744	5.73697	5.15534	5.91283	8.62099
8.61947	10.0228	10.6226	7.86282	10.2851	10.0723	13.7007	9.73087	11.8818	9.58013		6.8153	5.11773	6.66078	6.50687	7.01372	5.57686	5.6726	5.22672	5.88893	8.52359
8.64919	9.90468	10.6066	7.57048	10.29	9.88587	13.732	9.6894	11.7884	9.6987		7.05588	5.11779	6.61928	6.38187	7.01206	5.59424	5.75128	5.21946	5.94828	8.68267
8.62816	9.9884	10.5528	7.69148	10.3024	10.0839	13.8799	9.74726	11.8142	9.81963		7.03159	5.13365	6.645	6.45225	7.03555	5.60895	5.6499	5.20481	5.96934	8.6257
8.64616	9.91593	10.6065	7.26377	10.339	9.86435	13.7269	9.44252	11.8842	9.65703		7.10677	5.12838	6.66904	6.48222	7.04097	5.59691	5.66466	5.18453	5.89826	8.62049
8.64649	10.1098	10.5668	7.43924	10.2887	9.88016	13.6233	9.76419	11.9409	9.87607		6.99874	5.17544	6.59072	6.47542	7.05438	5.57148	5.7412	5.20888	5.96357	8.61272
8.56388	9.82478	10.5668	7.57558	10.302	9.95632	13.6711	9.74085	11.8673	9.72553		7.12815	5.17955	6.66567	6.41531	6.97667	5.61575	5.63678	5.19848	5.97246	8.52977
8.66645	9.97387	10.6381	7.89198	10.3866	9.90878	13.7344	9.65277	11.8505	9.74732		7.12721	5.17296	6.66016	6.45165	7.0817	5.64171	5.75743	5.20457	5.95517	8.67601
8.55021	9.99363	10.6294	8.00511	10.3189	9.9142	13.8212	9.74809	11.8443	9.80713		7.19488	5.13999	6.62336	6.51148	6.97075	5.71726	5.62951	5.20946	5.97019	8.63931
8.52521	10.1058	10.603	7.89136	10.2377	9.93442	13.7023	9.8544	11.8388	9.89569		7.1501	5.11295	6.66047	6.34887	7.02381	5.72298	5.72893	5.20827	6.1023	8.62039
8.6013	10.1221	10.5198	8.10274	10.3488	9.82046	13.6799	9.74646	11.9074	9.70458		6.91604	5.11952	6.67882	6.40738	6.98489	5.6958	5.58392	5.20927	6.03714	8.59197
8.61233	10.0413	10.6342	7.58911	10.3351	9.99722	13.7765	9.51131	11.8963	9.44655		6.92006	5.09238	6.69627	6.44715	6.96264	5.62359	5.63923	5.19534	6.04418	8.5952
8.57562	9.89052	10.6506	7.88588	10.2133	9.98348	13.8479	9.7972	11.959	9.40434		7.02757	5.13834	6.70047	6.39408	6.9715	5.65277	5.67669	5.18033	6.09474	8.53757
8.64182	9.81038	10.6151	7.92823	10.321	10.0606	13.6941	9.41416	11.9359	9.55508		6.77739	5.08946	6.62212	6.45567	7.01884	5.77918	5.67702	5.19279	6.09386	8.56119
8.61227	9.95306	10.5215	7.67821	10.2053	10.015	13.607	9.5555	11.9079	9.48151		7.13699	5.10044	6.69145	6.37033	7.0433	5.74174	5.66451	5.21264	6.08733	8.55026
8.63276	9.86869	10.5781	7.90547	10.2276	10.0215	13.7361	9.50696	11.8294	9.52529		7.03272	5.13454	6.66397	6.41366	7.03006	5.76548	5.73013	5.2153	6.11187	8.56978
8.60829	10.146	10.5966	7.601	10.2586	10.0414	13.6485	9.61833	11.913	9.28102		6.88826	5.13922	6.654	6.50978	7.00957	5.69796	5.63661	5.20915	6.10718	8.62737
8.55423	9.94719	10.4845	7.93816	10.3115	10.0041	13.5024	9.68921	11.8056	9.56511		6.64509	5.08157	6.7063	6.36305	7.00503	5.70607	5.71486	5.2075	6.12394	8.64986
8.63311	9.97602	10.4618	8.50496	10.3056	10.0217	13.6575	9.72429	11.8761	9.33609		6.68927	5.16633	6.66033	6.39287	6.96926	5.68899	5.68819	5.1914	6.1732	8.55498
8.5834	10.0225	10.4311	8.20583	10.2489	10.1216	13.7745	9.47212	11.7953	9.60973		6.97158	5.1467	6.62882	6.39894	7.04144	5.59334	5.69266	5.24734	6.14251	8.55476
8.63082	10.0345	10.4553	8.12356	10.3516	10.0206	13.7743	9.80684	12.0398	9.2424		6.97103	5.16717	6.74046	6.2784	6.95692	5.549	5.64805	5.19992	6.16406	8.64071
8.59111	10.0577	10.3565	8.235	10.2215	9.97839	13.9039	9.5555	11.7613	9.11454		6.80508	5.13656	6.65346	6.3144	6.93965	5.54605	5.70969	5.19881	6.257	8.58527
8.62549	9.99559	10.3917	8.37132	10.2129	9.97794	13.8226	9.75249	11.8034	9.42204		6.98878	5.15789	6.69436	6.30877	7.00459	5.60285	5.61555	5.1692	6.21464	8.62833
8.63919	10.0325	10.4252	8.35985	10.1952	10.0877	13.5345	9.47318	11.8957	9.29361		7.03025	5.22057	6.68532	6.39788	7.03366	5.5577	5.64468	5.13921	6.25579	8.59292
8.66574	9.93418	10.4173	8.44225	10.1621	10.0023	13.3559	9.47726	11.9208	9.24856		6.85126	5.22741	6.72888	6.39473	6.96911	5.60389	5.76723	5.10927	6.2454	8.55461
8.62872	10.1606	10.371	8.34829	10.3057	10.0641	13.2863	9.68484	11.7948	9.5679		7.09203	5.16451	6.74092	6.33136	6.954	5.63013	5.59314	5.17547	6.22929	8.53572
8.59144	10.0561	10.3994	8.3309	10.3186	9.89958	13.5165	9.84381	11.9316	9.60563		7.06913	5.128	6.6999	6.42162	6.95831	5.78519	5.77158	5.10296	6.21593	8.52668
8.67221	9.7964	10.405	8.06594	10.1641	9.99427	13.648	9.81016	11.7845	9.4713		7.0307	5.12529	6.62259	6.50387	7.01056	5.7141	5.68795	5.06087	6.24173	8.60679
8.65235	9.98273	10.3523	8.28442	10.3102	9.90765	13.6664	9.48414	11.7116	9.3121		7.05555	5.22414	6.77111	6.31303	6.9669	5.78101	5.708	5.12033	6.28356	8.6006
8.65832	10.0452	10.4088	8.38849	10.2795	9.95921	13.7919	9.84502	11.896	9.27118		6.90975	5.17286	6.67875	6.3934	6.98607	5.85993	5.62416	5.04424	6.25067	8.65195
8.63982	10.0173	10.3731	8.17215	10.2603	9.94574	13.728	9.53494	11.952	9.45162		6.86678	5.15854	6.69822	6.3658	6.97904	5.75526	5.6742	5.01777	6.33878	8.59131
8.59234	10.03	10.4057	8.44075	10.196	9.86723	13.5916	9.89325	11.7048	9.25372		6.88145	5.18496	6.6762	6.44742	7.02365	5.81256	5.71485	5.06367	6.28543	8.60068
8.6688	9.78559	10.3873	8.08927	10.1637	9.95691	13.9111	9.63181	11.6808	9.33654		7.1675	5.23064	6.74533	6.25545	6.95805	5.82554	5.60215	5.10468	6.32921	8.63605
8.57213	9.8711	10.3605	8.48066	10.1469	9.89941	13.9721	9.69938	11.6631	9.38741		6.96646	5.15367	6.7807	6.34414	6.98275	5.76868	5.72087	5.05323	6.34451	8.57466
8.67313	9.86968	10.3819	8.15038	10.2959	9.90544	13.6049	9.4272	11.8237	9.3114		7.42629	5.16362	6.78852	6.30222	6.96841	5.78397	5.62899	5.15477	6.36534	8.56238
8.6317	10.048	10.3831	8.40174	10.2795	9.77662	13.8401	9.67781	11.7201	9.15691		7.25282	5.21105	6.75645	6.42916	7.03199	5.88455	5.6738	5.1787	6.44524	8.67861
8.64922	9.8313	10.3605	8.01784	10.2828	9.85171	13.9686	9.56723	11.9659	9.26921		7.31318	5.21941	6.81693	6.30244	6.98295	5.83066	5.69944	5.09235	6.38095	8.62422
8.60407	9.69859	10.3865	8.09705	10.3692	9.99049	13.8068	9.6139	11.961	9.07932		7.27339	5.08035	6.75143	6.31006	7.00257	5.81369	5.63515	5.16049	6.52619	8.5971
8.59888	9.86586	10.2966	8.05004	10.273	9.94304	13.6751	9.79972	11.9185	8.90873		7.23262	5.18027	6.72914	6.33948	6.96683	5.84363	5.68808	5.16768	6.45843	8.56841
8.52019	9.87594	10.3739	7.88818	10.2493	9.96619	13.6788	9.59776	11.9738	9.03635		7.21848	5.13879	6.74605	6.35156	7.00608	5.82268	5.61468	5.11036	6.47381	8.63623
8.59389	10.0505	10.32	8.09112	10.2947	10.0561	13.5582	9.67273	11.9714	9.34197		7.11374	5.14611	6.78083	6.46808	7.009	5.90022	5.68004	5.06925	6.41469	8.61204
8.63182	9.97017	10.3823	8.12763	10.2818	9.94907	13.5432	9.79016	12.0148	8.94683		7.16019	5.19769	6.73234	6.21033	7.03235	5.94143	5.6098	5.13183	6.5049	8.56295
8.62501	9.8923	10.3302	7.87918	10.1439	9.97675	13.5787	9.92341	11.8055	9.13513		7.22124	5.19393	6.75147	6.25163	7.00972	5.94604	5.68393	5.13245	6.53567	8.58776
8.56981	9.97814	10.2992	7.90454	10.2103	9.9596	13.6937	9.6769	12.0544	9.18349		7.33378	5.20559	6.77205	6.36508	6.92461	5.98529	5.77242	5.08893	6.49281	8.58372
8.69762	10.0132	10.4037	8.0101	10.281	9.93051	13.5318	9.77349	11.863	9.1344		7.29814	5.19198	6.7586	6.28571	7.02667	6.05228	5.70054	5.0952	6.48553	8.45351
8.57855	10.0545	10.4281	8.35443	10.2849	9.88747	13.5033	9.72184	11.9631	9.12917		6.89237	5.09836	6.78799	6.32278	7.0213	5.96156	5.60966	5.10218	6.57809	8.4861
8.59535	9.92599	10.2805	8.09883	10.2946	9.78032	13.6742	9.86646	11.8876	8.942		7.10962	5.12589	6.8229	6.39524	6.93564	6.01715	5.62281	5.03407	6.50931	8.55077
8.62487	9.93873	10.3507	7.82877	10.3118	9.92586	13.7372	9.60326	11.9974	9.19577		6.95712	5.17699	6.85513	6.30995	6.99372	6.09758	5.70533	5.09382	6.62093	8.61668
8.67425	9.79601	10.3701	8.34562	10.2385	9.93327	13.5549	9.75508	11.9086	9.20645		6.97649	5.20438	6.73394	6.33061	6.99568	6.18473	5.68992	5.0382	6.60618	8.56561
8.62344	9.79706	10.3581	8.38306	10.2132	9.97005	13.7158	9.70168	11.9155	9.04255		7.07815	5.19961	6.8243	6.28871	6.96894	6.02806	5.63009	5.07176	6.54423	8.57323
8.62207	9.87706	10.2851	8.26166	10.2623	9.85114	13.5139	9.79685	11.9185	8.99849		6.98316	5.1601	6.79653	6.18023	6.96361	6.10198	5.68233	5.11675	6.60258	8.65997
8.65511	9.84756	10.343	8.76556	10.2308	9.96121	13.4879	9.74414	11.8773	8.88829		7.01525	5.18213	6.8276	6.27533	6.99897	6.01607	5.54215	5.05824	6.57723	8.58948
8.62468	9.98674	10.266	8.68545	10.2149	9.83991	13.6124	9.62631	11.9211	8.83925		6.9671	5.19883	6.77115	6.29956	6.93124	6.06114	5.60072	5.03167	6.61255	8.52306
8.56093	9.80091	10.4108	8.4256	10.2883	9.88176	13.6433	9.57914	11.9037	8.64751		7.04087	5.20879	6.7844	6.29115	6.97279	5.97846	5.67307	5.01808	6.58273	8.53076
8.64506	10.0343	10.2273	8.42407	10.218	9.95888	13.7751	9.48483	11.8719	8.72482		6.79247	5.19357	6.82601	6.14539	6.9972	6.00064	5.59998	5.06424	6.64044	8.59334
8.58431	9.87785	10.2182	8.10868	10.1221	9.92666	13.7637	9.92825	11.8627	8.67326		7.05767	5.17977	6.83258	6.22453	6.96818	5.97283	5.60172	5.00165	6.60423	8.66788
8.66216	9.71549	10.2802	8.36649	10.1696	9.99694	13.7237	9.81492	11.8024	8.69987		7.08845	5.23837	6.77266	6.32875	7.01082	5.83072	5.7572	4.99652	6.69067	8.62877
8.60027	9.92449	10.2502	8.40262	10.2252	9.81107	13.7551	9.77366	11.891	8.79223		7.06076	5.29138	6.73681	6.24684	6.96927	5.93312	5.60274	5.02689	6.65512	8.60026
8.64355	9.93813	10.233	8.34293	10.1772	9.93044	13.7514	9.6232	11.9803	8.86614		6.86071	5.26219	6.75365	6.10681	6.95101	5.84584	5.75831	5.06316	6.70992	8.67873
8.5766	10.019	10.2279	8.09655	10.3068	9.78241	13.6359	9.54753	11.8848	8.44647		6.83321	5.23388	6.76252	6.35877	6.97884	5.84004	5.6805	5.00506	6.71717	8.66065
8.62917	9.75301	10.2651	8.31833	10.2019	9.94137	13.7589	9.70977	11.9331	8.30819		6.56396	5.27385	6.8923	6.37184	7.00757	5.89098	5.61698	5.0408	6.83947	8.58882
8.58183	9.83176	10.34	8.40952	10.2133	9.97643	13.8206	9.61704	12.0843	8.98416		6.80507	5.24288	6.82263	6.19919	6.9938	6.01638	5.52605	5.05236	6.78449	8.59973
8.67293	10.0015	10.2218	8.47351	10.3163	9.8675	13.6439	9.65939	11.8484	8.76269		6.64487	5.29313	6.83298	6.1743	6.95059	6.06569	5.73331	5.01485	6.83468	8.64445
8.65985	9.80308	10.2556	8.5297	10.1752	9.91202	13.6756	9.77698	11.8657	8.67322		6.80739	5.22227	6.82884	6.33571	6.98086	6.05252	5.61734	5.02643	6.79542	8.70069
8.59556	9.69846	10.3427	8.85856	10.2187	9.86258	13.5709	9.7099	11.9452	9.09957		6.59449	5.21346	6.74444	6.27818	6.95338	6.02686	5.75136	5.0397	6.77774	8.66319
8.68165	9.79152	10.2879	9.00295	10.1983	9.91261	13.7442	9.68973	11.7188	9.19894		7.04367	5.22756	6.68962	6.31892	6.97159	5.93844	5.67407	4.98367	6.76572	8.61636
8.63989	9.75238	10.3144	9.04786	10.0826	9.89295	13.8893	9.68366	11.698	8.99545		7.00157	5.1496	6.7654	6.15223	6.94405	6.08595	5.67602	4.98749	6.7386	8.60176
8.64594	9.87216	10.3068	8.98481	10.2865	9.98305	13.7594	9.65792	11.8538	8.79612		7.13579	5.13645	6.75467	6.26064	6.96122	5.95069	5.54861	4.93344	6.79287	8.66221
8.69874	9.93389	10.371	9.28578	10.2152	9.99177	13.7622	9.81415	11.7453	9.18859		6.99758	5.19324	6.79937	6.18742	6.92826	5.9442	5.66212	4.9512	6.79779	8.60783
8.59599	9.8754	10.3207	9.07961	10.1802	9.89911	13.702	9.68109	11.7493	8.81015		7.21906	5.19051	6.85247	6.17578	7.01557	5.99077	5.66895	4.90054	6.87562	8.59551
8.61416	9.97535	10.301	8.88838	10.1916	9.99661	13.6461	9.81074	11.7898	8.80741		7.14182	5.29814	6.81749	6.28119	6.93322	6.04955	5.65247	4.91299	6.82876	8.61295
8.59976	9.71684	10.3907	9.10065	10.2067	9.90504	13.6036	9.73866	11.9206	8.87106		6.97046	5.17557	6.77202	6.25003	6.96003	6.0298	5.58783	4.92659	6.89154	8.56755
8.62825	9.86173	10.368	9.09929	10.1357	9.90362	13.5514	9.80754	11.5105	8.68619		7.13514	5.2187	6.78433	6.14444	6.96994	6.02029	5.63645	4.89781	6.86564	8.56964
8.61628	9.96425	10.3298	8.84833	10.1887	9.89087	13.6582	9.4851	11.6286	8.72887		7.17623	5.19432	6.84341	6.28935	7.0141	6.10902	5.64303	4.90634	6.94033	8.5943
8.60158	9.8114	10.3433	8.79913	10.2013	9.8075	13.3963	9.74981	11.7902	8.92418		6.99345	5.14291	6.80868	6.15678	6.94647	6.13185	5.60527	4.92679	6.96326	8.5226
8.68921	9.93273	10.4379	8.67011	10.2248	9.79499	13.5428	9.81956	11.7709	9.4206		7.20825	5.12067	6.8216	6.19942	7.02207	6.13438	5.64735	4.92749	6.89604	8.567
8.63141	9.86025	10.3665	8.88986	10.2739	9.93605	13.6163	9.75018	11.609	9.06786		7.02291	5.20428	6.80702	6.26793	6.97554	6.11514	5.64207	4.9202	7.01295	8.59104
8.54349	9.86451	10.4326	8.66583	10.2189	9.90179	13.6029	9.68998	11.7616	8.73337		7.00466	5.18872	6.83461	6.13309	6.97982	6.08661	5.64006	4.9778	7.02598	8.54868
8.63626	9.84469	10.4009	8.47666	10.298	9.94167	13.7352	9.73558	11.7202	8.97455		6.89501	5.10681	6.84365	6.14467	6.95472	6.10304	5.64606	5.02928	7.01354	8.60789
8.60386	9.79634	10.4395	8.61511	10.4018	9.92626	13.6881	9.68741	11.5363	8.70617		6.96084	5.25823	6.89562	6.22695	7.00142	6.10164	5.62336	4.96622	7.07114	8.61075
8.63869	9.59449	10.4151	8.66087	10.2447	9.88833	13.5769	9.71851	11.7861	8.45733		6.91367	5.18104	6.92049	6.20359	6.9588	6.07774	5.57489	4.9155	7.03787	8.58044
8.58186	9.73968	10.4155	8.92664	10.2036	9.77805	13.6465	9.89154	11.8522	8.49002		7.0327	5.23086	6.8149	6.28823	7.05941	6.10203	5.61887	4.98158	7.03482	8.65728
8.57241	9.8631	10.3924	9.15994	10.2171	9.73327	13.7246	9.88006	11.6449	8.84585		6.61494	5.23443	6.85482	6.2633	6.9913	6.06146	5.57022	4.95416	7.06438	8.63763
8.6676	9.89529	10.4592	9.05278	10.2091	9.83096	13.7598	9.71674	11.7193	9.17264		6.6978	5.28302	6.91641	6.25912	7.03211	6.09245	5.75544	4.89335	7.09335	8.66699
8.55437	9.9142	10.4121	9.21814	10.2687	9.80022	13.6593	9.68299	11.7008	8.6911		6.95651	5.15863	6.92687	6.19722	6.93479	6.1018	5.59966	4.94504	7.11166	8.62897
8.59492	9.90561	10.4285	8.93859	10.198	9.86237	13.7401	9.55742	11.717	8.93198		6.95936	5.24554	6.78172	6.37097	6.95949	6.12268	5.53491	4.92719	7.17986	8.65991
8.56391	9.90992	10.4231	8.80984	10.2637	9.71969	13.8883	9.83486	11.7831	8.9208		7.24003	5.24331	6.86131	6.32496	6.93902	6.2083	5.53225	4.90329	7.11436	8.55943
8.60116	9.97048	10.4463	8.46729	10.2418	9.93045	13.696	9.65442	11.9808	8.59765		7.21371	5.19279	6.90191	6.25923	6.99771	6.15747	5.6562	4.91244	7.21161	8.72224
8.58673	9.85627	10.393	8.80114	10.3339	9.65808	13.6498	9.76942	11.9559	8.51267		6.89923	5.25037	6.9111	6.19191	6.98394	6.15204	5.57676	4.91285	7.25679	8.65509
8.62695	9.80172	10.3668	8.47624	10.3024	9.98822	13.6925	10.0137	11.6618	8.29322		6.76751	5.23726	6.9479	6.18452	6.96126	6.15932	5.50674	4.8745	7.16955	8.69115
8.61078	9.80569	10.5384	8.72888	10.2942	9.79406	13.7197	9.95292	11.8476	8.59996		6.96758	5.23778	6.98349	6.12251	6.9623	6.17084	5.61723	4.89272	7.20871	8.64191
8.53843	9.61848	10.5486	8.92798	10.1495	9.93704	13.7475	9.80449	11.8549	8.92518		7.16059	5.24293	6.83125	6.24006	6.99072	6.24337	5.5442	4.92281	7.12954	8.61421
8.59211	9.85564	10.518	8.97346	10.1354	9.88315	13.6694	9.8798	11.8216	8.91569		7.05139	5.2633	6.90008	6.2691	6.98187	6.31229	5.5454	4.86938	7.13244	8.61054
8.59788	9.68361	10.4396	9.30307	10.1934	9.82291	13.6409	9.87006	11.5403	8.90957		7.1168	5.24705	6.94823	6.18382	7.04045	6.18528	5.47857	4.81999	7.20861	8.6149
8.60987	9.85207	10.4304	9.34898	10.1304	9.92751	13.6682	9.6787	11.7032	8.90155		7.24704	5.2989	6.8708	6.16742	7.0477	6.21682	5.61499	4.82358	7.28101	8.65294
8.66049	9.82509	10.4919	8.79283	10.0896	9.92433	13.5995	9.70509	11.8505	8.22448		7.14877	5.2096	6.78856	6.31004	7.0118	6.20861	5.53149	4.85547	7.22493	8.62095
8.59962	9.92703	10.5105	9.00703	10.1692	9.99779	13.5482	9.67873	11.637	8.19427		7.19105	5.17235	6.87665	6.22778	7.04057	6.33763	5.49692	4.78124	7.24126	8.62801
8.61261	9.72066	10.4979	9.39961	10.2016	10.1634	13.6409	9.67347	11.7121	8.71235		7.10161	5.26413	6.77316	6.23335	7.05647	6.32586	5.51874	4.73414	7.1675	8.59868
8.663	9.65174	10.4176	9.15945	10.2317	9.96127	13.5695	9.39083	11.8989	7.74629		7.23983	5.24239	6.98359	6.36565	7.0883	6.26447	5.48858	4.79355	7.27082	8.57027
8.55189	9.76267	10.4408	8.68742	10.1421	9.85243	13.5627	9.77987	11.7284	7.14917		7.037	5.29834	6.83328	6.07942	7.04857	6.2872	5.40268	4.78458	7.29235	8.54883
8.64281	9.74583	10.5297	8.69723	10.2504	9.97795	13.6272	9.79202	11.5681	7.22668		7.18193	5.23696	6.82105	6.11637	7.03795	6.29801	5.53324	4.75167	7.2546	8.69529
8.63923	9.89158	10.3408	8.86135	10.0978	9.91686	13.7419	9.71781	11.7332	7.31595		7.20915	5.21135	6.95693	6.1229	7.08432	6.30268	5.51682	4.78834	7.29315	8.54847
8.57309	9.84575	10.3505	8.96776	10.0516	9.98686	13.6762	9.86176	11.7314	7.40414		7.13592	5.2475	6.96248	6.10473	7.09472	6.31574	5.50458	4.78705	7.27897	8.56349
8.53557	9.61263	10.4575	8.5429	10.0141	9.76679	13.6749	9.68203	11.6952	7.79011		7.41395	5.19427	6.89788	6.14563	7.01243	6.32735	5.41907	4.80421	7.21666	8.56837
8.53869	9.64682	10.4457	8.65635	10.2402	9.69698	13.8645	9.77704	11.7196	7.79328		7.39113	5.24314	6.87634	6.12132	6.99298	6.32822	5.49602	4.78725	7.29483	8.52051
8.68494	9.68227	10.3248	8.67415	10.1042	9.66037	13.6394	9.71257	11.729	8.37495		7.18779	5.30544	6.8629	6.28116	6.98479	6.36905	5.47493	4.84002	7.30241	8.61258
8.6762	9.74923	10.3508	8.71755	10.0517	9.91005	13.5338	9.64372	11.8411	8.38873		6.99202	5.29997	6.84729	6.20381	7.04146	6.47422	5.41046	4.76505	7.29329	8.68849
8.58374	9.71114	10.314	8.06271	10.1706	9.83376	13.6338	9.52949	11.7789	8.81051		7.24992	5.29106	6.8336	6.15057	6.99814	6.43381	5.49585	4.74945	7.16608	8.71573
8.58512	9.70237	10.3153	8.62675	10.1333	9.83583	13.6074	9.6403	11.7123	9.0033		7.31933	5.19658	6.89219	6.20574	7.04946	6.43675	5.39951	4.77062	7.28783	8.59542
8.60784	9.71028	10.4422	8.52308	10.0782	9.7757	13.5031	9.62418	11.8783	8.33943		7.28039	5.29466	6.91708	6.14656	7.01896	6.51214	5.33007	4.75921	7.27239	8.60736
8.66	9.7115	10.4034	8.17367	10.0285	9.75364	13.4364	9.57753	11.7908	8.44238		7.34082	5.28795	6.97766	6.15294	6.97003	6.42976	5.39401	4.77184	7.27079	8.60671
8.60063	9.53032	10.3369	8.08529	10.1241	9.89941	13.4307	9.63274	11.7476	8.43812		7.10146	5.34414	7.00782	6.34322	6.95627	6.51403	5.33664	4.78832	7.25544	8.54052
8.58769	9.79314	10.3459	8.75203	10.1863	9.64676	13.5398	9.69745	11.6348	8.25806		7.15411	5.28495	6.96728	6.24649	6.96731	6.55692	5.37215	4.78661	7.30828	8.65437
8.65746	9.83994	10.3394	8.11106	10.156	9.74801	13.6336	9.92587	11.8264	8.11869		7.01971	5.25812	6.92788	6.07434	6.93324	6.59425	5.3568	4.77392	7.31105	8.61018
8.60572	9.78903	10.347	8.25082	10.2032	9.6868	13.7371	9.76343	11.773	7.71266		7.33673	5.25557	6.8727	6.1671	6.97008	6.65474	5.32051	4.71885	7.36789	8.58595
8.59472	9.57403	10.3071	8.7001	10.2392	9.70821	13.6288	9.779	11.7362	7.59979		7.27993	5.23231	6.97747	6.10485	7.02324	6.6267	5.4291	4.76467	7.28335	8.55459
8.57265	9.81654	10.4548	8.30457	10.1334	9.64529	13.5729	9.75379	11.6869	7.17665		7.30671	5.28487	6.97148	6.17852	6.96059	6.69392	5.50537	4.7449	7.36372	8.60072
8.60309	9.88656	10.4205	8.34117	10.2053	9.81822	13.4735	9.74563	11.6944	7.01329		7.37377	5.29089	6.82883	6.27699	6.95332	6.68238	5.38184	4.69375	7.27308	8.59676
8.62987	9.82473	10.415	8.29616	10.2485	9.69815	13.3974	9.89794	11.4386	6.41151		7.30379	5.33175	6.8873	6.18238	6.89257	6.66417	5.36408	4.74672	7.36748	8.59957
8.62337	9.75434	10.2533	8.68864	10.2109	9.86757	13.4414	9.63515	11.7421	6.97814		7.22455	5.25997	7.02278	6.10766	6.98318	6.65744	5.46467	4.77078	7.32403	8.57034
8.63106	9.68929	10.3145	8.3841	10.2528	9.67654	13.691	9.79269	11.6934	6.76899		7.30279	5.22175	6.80908	6.06588	6.9748	6.70852	5.44885	4.73956	7.4594	8.51879
8.56738	9.81005	10.3922	8.50556	10.195	9.85179	13.5108	9.65567	11.6556	6.72729		7.27792	5.21086	6.92478	6.14328	6.93901	6.72004	5.41103	4.77777	7.40102	8.63461
8.62474	9.82582	10.3731	8.79172	10.1903	9.87098	13.7097	9.6527	11.6551	6.45588		7.2515	5.23627	6.91527	6.19107	6.92259	6.85131	5.49424	4.80852	7.43266	8.55398
8.5966	9.84589	10.4531	8.81404	10.2207	9.84673	13.7951	9.65511	11.7145	6.68984		7.28908	5.22713	6.89051	6.09968	6.95841	6.86958	5.37058	4.79052	7.43191	8.63463
8.61282	9.67844	10.3416	8.68542	10.2716	9.9014	13.8193	9.87566	11.4267	6.44243		7.38088	5.20688	6.94971	6.19073	6.89722	6.90123	5.32958	4.78562	7.48552	8.58485
8.61341	9.7963	10.3603	9.01494	10.2492	9.96207	13.7139	9.75707	11.6847	6.47488		7.55638	5.26569	6.92964	6.14039	6.97081	6.94915	5.45452	4.7932	7.50302	8.60291
8.66567	9.7937	10.3968	9.16374	10.26	9.89298	13.768	9.73356	11.6151	6.52334		7.32509	5.22366	6.91158	6.17406	6.87762	7.0024	5.41633	4.73754	7.46914	8.57418
8.59109	9.76366	10.3778	8.80413	10.1486	9.90274	13.7011	10.0448	11.5338	6.8902		7.39827	5.24132	6.93736	6.10133	6.91879	7.03612	5.4495	4.74027	7.40339	8.63722
8.58094	9.79213	10.3896	8.34661	10.1501	9.70663	13.6964	10.0844	11.515	6.69645		7.40031	5.2763	6.9138	6.2619	6.86626	7.10088	5.36544	4.75063	7.40262	8.57238
8.55124	9.77703	10.3304	8.62412	10.0874	9.76528	13.7311	9.59424	11.6798	6.70385		7.51426	5.29978	6.90228	6.17828	6.91702	7.20737	5.45441	4.73983	7.42814	8.5422
8.58542	9.7598	10.2805	8.54864	10.1657	9.8018	13.6975	10.518	11.5357	7.11065		7.33645	5.34133	7.0084	6.02911	6.90595	7.13167	5.43542	4.73485	7.40679	8.59397
8.67022	9.70704	10.4154	8.60246	10.2127	9.7243	13.651	10.2043	11.6874	6.93573		7.42984	5.21341	6.89272	6.18409	6.88899	7.20158	5.39937	4.76858	7.52528	8.58715
8.5582	9.78443	10.3808	8.4132	10.1226	9.76001	13.6057	10.0563	11.626	7.10873		7.42385	5.24892	6.91689	6.23095	6.90548	7.24079	5.37087	4.74247	7.52268	8.56097
8.58806	9.77912	10.426	9.03603	10.1392	9.85955	13.4352	10.0828	11.5856	7.42279		7.29556	5.29653	6.97993	6.15438	6.86794	7.33003	5.45289	4.70614	7.53501	8.60736
8.52582	9.69203	10.3297	8.19268	10.2174	9.85909	13.3531	9.76725	11.6374	7.24493		7.55146	5.33566	7.01735	6.28713	6.85973	7.29467	5.39445	4.7272	7.55505	8.60759
8.61934	9.70863	10.3224	8.54311	10.1571	9.75898	13.5626	9.71977	11.7173	6.96845		7.35935	5.28967	6.96144	6.15921	6.90837	7.50189	5.4494	4.6963	7.55895	8.7209
8.59266	9.82203	10.402	9.02182	10.2719	9.8389	13.553	9.91068	11.7312	6.77435		7.44418	5.30937	6.94899	6.04694	6.92287	7.6124	5.36925	4.6807	7.57656	8.64879
8.574	9.72102	10.3946	9.01198	10.2808	10.0023	13.5809	10.0135	11.7028	7.42458		7.54062	5.26711	6.98857	6.28976	6.85293	7.76376	5.42573	4.66382	7.59717	8.64381
8.54566	9.71333	10.3082	8.65025	10.3616	9.77644	13.5488	9.6039	11.4536	7.33999		7.30913	5.26838	6.91597	6.03921	6.91129	7.85427	5.4504	4.72779	7.56515	8.53012
8.57322	9.59301	10.317	8.96524	10.3444	9.76699	13.6204	9.74001	11.7246	7.03041		7.29539	5.23815	6.98876	6.20976	6.96307	7.8996	5.33893	4.67723	7.63007	8.67078
8.55033	9.6686	10.324	9.08148	10.3126	9.65732	13.571	9.9235	11.605	6.93356		7.41116	5.19719	7.06616	6.0612	6.86209	7.88444	5.49431	4.64427	7.58844	8.55171
8.64605	9.6484	10.2968	8.66622	10.2251	9.81028	13.5505	9.85281	11.6941	6.9613		7.32099	5.25457	7.08676	6.25362	6.85433	8.03149	5.33172	4.68048	7.62646	8.61306
8.60477	9.6731	10.2879	8.85319	10.2905	9.79674	13.568	9.85855	11.7263	7.13534		7.45754	5.26342	6.97263	6.11256	6.90492	7.99969	5.46222	4.64674	7.59881	8.52806
8.66006	9.79347	10.4097	8.99091	10.2387	9.76988	13.6734	9.86395	11.824	7.12362		7.56797	5.40005	6.99864	6.11418	6.89139	8.08318	5.47273	4.60517	7.60298	8.54608
8.49688	9.78837	10.409	8.59966	10.283	9.75006	13.6884	9.87583	11.8267	6.66782		7.45337	5.35872	6.86864	6.14062	6.90688	7.93428	5.45051	4.58147	7.67899	8.51671
8.58123	9.73934	10.343	8.71253	10.3027	9.86845	13.8303	9.77521	11.7362	7.01597		7.51833	5.35676	6.96196	6.1228	6.97344	8.06798	5.37917	4.6309	7.70886	8.52172
8.63733	9.77239	10.4573	9.01153	10.2238	9.80112	13.758	9.82236	11.7669	6.935		7.43686	5.31251	6.90997	6.27455	6.90501	8.0328	5.36647	4.62165	7.73976	8.56434
8.61605	9.75417	10.3676	8.75234	10.2776	9.91588	13.8001	9.80988	11.7544	7.33685		7.47412	5.30451	6.99342	6.19192	6.86645	8.16344	5.4343	4.61912	7.80364	8.62945
8.57953	9.70517	10.4327	8.44701	10.2737	9.77219	13.7311	9.56455	11.6817	6.51204		7.43931	5.29947	6.91676	6.17433	6.89093	8.08174	5.33781	4.60255	7.73801	8.61234
8.62482	9.75776	10.3361	8.94536	10.2523	9.62333	13.6537	9.75707	11.5537	6.80558		7.47405	5.34926	6.99168	6.16572	6.92388	8.09306	5.47037	4.6256	7.84742	8.68545
8.60124	9.72252	10.3621	8.92889	10.3324	9.91757	13.5959	9.62013	11.7181	7.45247		7.45753	5.27346	6.92409	6.26898	6.87294	8.06719	5.42029	4.64128	7.72531	8.55525
8.64058	9.68788	10.3819	8.90609	10.3854	9.8362	13.5461	9.67377	11.6355	6.85574		7.4557	5.44137	7.01479	6.10956	6.85982	8.27149	5.37645	4.64583	7.73026	8.64912
8.57748	9.79751	10.2701	9.14302	10.2922	9.83791	13.5349	9.61795	11.7005	6.81257		7.49335	5.46648	6.95563	6.01198	6.96478	8.13957	5.36625	4.64001	7.75843	8.63052
8.53948	9.58456	10.2707	8.84849	10.3202	9.82425	13.7395	9.81634	11.7188	7.07301		7.70573	5.36435	7.01227	6.17799	6.91438	8.21621	5.4449	4.62465	7.75354	8.65413
8.64115	9.69247	10.3847	8.74398	10.4268	9.89011	13.6348	9.6522	11.7106	7.24705		7.57179	5.35649	7.0561	6.02051	6.94534	8.21659	5.38889	4.61925	7.87443	8.63381
8.62467	9.66347	10.3633	8.55964	10.3604	9.79334	13.4809	9.70508	11.7174	7.13698		7.4426	5.33247	7.05239	6.06137	6.90077	8.09414	5.30116	4.58526	7.77316	8.59494
8.60147	9.70016	10.4006	9.0032	10.3592	9.74517	13.5545	9.827	11.624	7.23316		7.72445	5.26056	6.93841	6.12454	6.92472	8.10594	5.38239	4.57221	7.90409	8.57858
8.61515	9.79623	10.3064	8.58699	10.429	9.64891	13.5611	9.73588	11.6011	7.61491		7.46742	5.41403	7.05752	6.26737	6.92599	8.03166	5.44053	4.57194	7.92353	8.62215
8.62385	9.78129	10.3619	8.62167	10.2932	9.94161	13.1444	9.76628	11.8056	7.02342		7.61243	5.36301	6.97848	6.18896	6.86484	8.10231	5.36624	4.56604	7.8447	8.6312
8.67153	9.69624	10.3691	8.50008	10.3719	9.88333	13.5229	9.72793	11.7782	7.04494		7.61151	5.19292	6.98001	6.09518	6.9174	8.206	5.42749	4.54905	7.87753	8.60778
8.61381	9.57879	10.3692	8.54955	10.1929	9.78342	13.6784	9.77192	11.6528	7.41329		7.48802	5.31943	6.97345	6.2516	6.88656	8.11827	5.36718	4.56321	7.8485	8.66795
8.58291	9.52323	10.3641	8.67394	10.3349	9.79728	13.5731	9.76124	11.6114	6.71799		7.68191	5.39692	6.92976	6.21912	6.96123	8.1619	5.36644	4.53494	7.92035	8.66552
8.60933	9.66707	10.2867	8.46329	10.3281	9.73252	13.5932	9.89283	11.7378	6.7393		7.69122	5.456	6.96423	6.10738	6.90166	8.14769	5.3571	4.52243	8.00889	8.53795
8.6233	9.62533	10.3125	8.3752	10.3783	9.86827	13.4196	10.0198	11.7816	7.10398		7.6195	5.51634	7.005	6.20625	6.92177	8.20539	5.36062	4.54292	7.97975	8.55131
8.64438	9.63312	10.4021	8.78717	10.3436	9.81355	13.4402	9.86857	11.475	6.83717		7.66742	5.41652	6.95972	6.20097	6.8876	8.10174	5.39896	4.5525	8.06222	8.58375
8.53671	9.6275	10.4203	8.8632	10.4055	9.92122	13.6102	9.74196	11.8498	7.07377		7.43652	5.41952	7.08008	6.18835	6.95662	8.1597	5.32551	4.53837	8.07712	8.5211
8.6735	9.6175	10.4405	8.81939	10.1852	9.71637	13.5807	9.77909	11.9151	7.11711		7.37892	5.29211	7.07099	6.15972	6.8798	8.19259	5.39362	4.57355	7.99161	8.53515
8.59426	9.68368	10.3787	8.61503	10.2633	9.63346	13.6742	9.82225	11.4909	7.03037		7.32503	5.29669	7.06568	6.25187	6.91102	8.1252	5.31632	4.53639	7.991	8.62108
8.61951	9.60862	10.3883	8.62538	10.2712	9.75157	13.6583	9.86075	11.5163	6.79288		7.33293	5.21912	7.00435	6.16746	6.84704	8.1657	5.36948	4.54181	8.02294	8.56775
8.6171	9.7774	10.3607	8.57213	10.2683	9.56125	13.6531	9.80843	11.8533	6.86682		7.62566	5.20406	7.05969	6.25353	6.92263	8.18146	5.24964	4.56416	8.04551	8.6293
8.6728	9.81736	10.3957	9.01677	10.2852	9.72429	13.3715	10.1248	11.6942	7.03988		7.35023	5.18239	7.00352	6.28417	6.92504	8.13937	5.38411	4.56215	7.99224	8.57176
8.69754	9.68567	10.3026	8.49991	10.2995	9.69601	13.427	10.1818	11.5939	6.98233		7.43446	5.19677	6.95273	6.10466	6.8708	8.1965	5.30211	4.55158	8.02053	8.52677
8.66146	9.69448	10.3933	9.19968	10.3636	9.76042	13.0602	9.79755	11.9628	7.14152		7.5543	5.11425	6.98531	6.11107	6.91224	8.20361	5.3749	4.57905	8.05765	8.64105
8.67248	9.76831	10.3817	8.91082	10.2431	9.65795	13.4189	9.94815	11.5017	7.19666		7.4012	5.33267	7.01692	5.922	6.8987	8.08205	5.42238	4.56494	7.96662	8.67236
8.60312	9.59344	10.295	9.01146	10.3834	9.66901	13.5044	10.0482	11.428	7.57448		7.54919	5.34773	6.96249	6.09707	6.84004	8.02872	5.38556	4.51513	8.15704	8.57212
8.57347	9.545	10.3758	9.06507	10.3525	9.67384	13.5879	10.1558	11.7157	7.25618		7.33246	5.47328	6.97622	6.18658	6.91914	8.13037	5.32632	4.52937	8.02682	8.59836
8.59679	9.76507	10.4199	8.77562	10.2932	9.98839	13.605	10.3218	11.7623	7.34628		7.43459	5.50213	6.9493	6.23883	6.84744	8.16033	5.33209	4.57517	8.11669	8.54887
8.61294	9.49237	10.4871	8.78709	10.2465	9.77084	13.5095	10.2687	11.6553	7.44359		7.5058	5.48358	6.99482	6.22254	6.85979	8.18162	5.32862	4.54273	8.07778	8.56821
8.60415	9.7376	10.3978	8.80581	10.3367	9.80594	13.4493	10.106	11.6425	7.22424		7.38509	5.48814	7.0203	6.20263	6.92123	8.18867	5.28257	4.53136	8.26969	8.59876
8.66181	9.6541	10.3684	8.64733	10.2886	9.81486	13.5478	9.95109	11.7054	7.31076		7.46676	5.50977	7.08537	6.15019	6.89499	8.15638	5.23126	4.50618	8.20842	8.51639
8.59912	9.69462	10.4462	8.35522	10.3162	9.85552	13.5595	10.154	11.6009	7.59465		7.61903	5.47595	6.98072	6.22605	6.88077	8.15907	5.29218	4.50767	8.09329	8.60523
8.65626	9.69544	10.4282	8.70325	10.2938	9.84286	13.5482	10.032	11.7083	7.32241		7.3426	5.5623	6.9752	6.13463	6.85813	8.14329	5.26812	4.54845	8.15481	8.51362
8.62833	9.78567	10.4309	8.48489	10.3135	9.66937	13.6292	10.0092	11.8724	7.63161		7.38291	5.54064	7.10477	6.24048	6.83504	8.19149	5.20117	4.47662	8.2701	8.58575
8.62394	9.76349	10.3854	8.43252	10.2	9.61926	13.6084	10.1188	11.7694	7.40176		7.34969	5.57435	7.11439	6.12886	6.85397	8.1124	5.12319	4.43641	8.21145	8.57387
8.6691	9.6931	10.4345	8.18012	10.2336	9.7605	13.5169	9.90505	11.5927	7.53344		7.4382	5.50137	7.03497	6.22244	6.84789	8.13801	5.25846	4.49149	8.17593	8.65312
8.59012	9.67976	10.5877	8.69145	10.1677	9.80246	13.4823	9.9411	11.9207	7.44414		7.67733	5.62606	7.03398	6.22919	6.799	8.11554	5.32465	4.49996	8.21431	8.5991
8.63481	9.65865	10.5999	8.4643	10.2156	9.66961	13.3797	9.79945	11.9046	7.79831		7.21732	5.61208	7.02753	6.25936	6.88305	8.19273	5.25151	4.48336	8.1984	8.64
8.67689	9.68745	10.5596	8.46542	10.238	9.72697	13.4063	9.92528	11.6773	7.98798		7.28627	5.55312	7.01454	6.17586	6.83235	8.11121	5.31319	4.49914	8.23369	8.69478
8.61663	9.65473	10.4778	8.88653	10.2273	9.63327	13.5008	9.78897	11.6054	7.94409		7.2617	5.61732	7.0566	6.13837	6.84082	8.01418	5.17084	4.50894	8.13827	8.58577
8.66632	9.58326	10.6191	8.52409	10.2242	9.75887	13.5187	10.0104	11.9568	8.5758		7.56016	5.58524	7.10517	6.19709	6.83954	8.15172	5.18214	4.45834	8.24778	8.62644
8.61185	9.61226	10.5466	8.55742	10.2385	9.74792	13.5689	9.73995	11.8625	8.33603		7.30044	5.5755	7.00931	5.97059	6.89839	8.12446	5.23441	4.47531	8.22307	8.62219
8.60598	9.74001	10.577	8.98394	10.1475	9.84348	13.5717	9.95579	11.6526	8.41179		7.58112	5.5615	6.97635	6.2641	6.81675	8.01919	5.22958	4.52868	8.24739	8.64611
8.64377	9.67874	10.5112	8.86352	10.27	9.69352	13.6572	10.0471	11.8175	8.45683		7.50436	5.53578	7.03675	6.14309	6.87656	8.05696	5.22067	4.51454	8.29737	8.61825
8.6447	9.68697	10.4558	8.51318	10.3284	9.69957	13.68	9.81975	11.8447	8.58911		7.44087	5.50927	6.94315	6.18129	6.88379	8.07414	5.19689	4.52008	8.29673	8.60482
8.63884	9.75522	10.5465	8.31016	10.297	9.77202	13.4742	9.89687	11.839	8.40237		7.53021	5.45516	6.99096	6.0976	6.8764	8.11426	5.13986	4.50207	8.27055	8.66696
8.645	9.72299	10.5861	9.0796	10.4323	9.74121	13.5303	9.89315	11.6298	8.38863		7.13287	5.5675	6.92248	6.12143	6.87596	8.03252	5.12471	4.46305	8.24455	8.74029
8.62732	9.58025	10.6616	9.10238	10.3827	9.60472	13.5363	9.70469	11.8588	8.33109		7.39965	5.59058	7.01118	6.25336	6.93056	8.08112	5.23804	4.48119	8.3007	8.64052
8.68703	9.76861	10.517	8.42546	10.4149	9.726	13.5346	9.78052	11.559	8.64834		7.42189	5.58569	6.97945	6.26261	6.87652	8.1026	5.10196	4.49314	8.35448	8.54885
8.69125	9.75209	10.6396	8.9142	10.4881	9.65603	13.4567	9.70492	11.8023	8.18084		7.28906	5.48537	7.02326	6.21214	6.87326	8.11219	5.19725	4.50406	8.30751	8.60253
8.58677	9.76123	10.4986	8.69264	10.4305	9.79165	13.4209	9.86666	11.8421	8.26134		7.43979	5.53961	7.08141	6.22388	6.88397	8.07917	5.11238	4.51296	8.32589	8.63501
8.59989	9.65284	10.6288	8.58296	10.4328	9.70644	13.4423	9.80197	11.8293	7.97185		7.83195	5.57209	6.98884	6.28981	6.91358	8.03468	5.14521	4.50222	8.3627	8.6725
8.63666	9.70712	10.6317	8.56578	10.4543	9.63298	13.5296	9.73643	11.7883	7.70272		7.4393	5.65177	7.0858	6.0723	6.94202	8.05949	5.07436	4.476	8.45433	8.52924
8.56548	9.74897	10.4941	8.84823	10.4496	9.69298	13.5536	9.90627	11.8656	7.77028		7.3254	5.6441	7.09422	6.08559	6.89548	8.04556	5.0046	4.50836	8.28525	8.65292
8.65904	9.74151	10.5879	9.01148	10.3384	9.63193	13.5411	9.74087	11.9351	7.53931		7.371	5.61879	7.04155	6.16713	6.91826	8.11426	5.10271	4.47544	8.44933	8.63241
8.6137	9.7095	10.5443	8.61266	10.4274	9.57112	13.4822	9.79106	11.8218	7.56647		7.50301	5.52808	7.03862	6.15435	6.93008	8.07131	5.09586	4.4572	8.43609	8.59127
8.62737	9.60322	10.4791	8.71683	10.386	9.49114	13.3902	9.75846	11.8986	7.04913		7.34162	5.52108	7.09581	6.15575	6.87575	8.09928	5.08832	4.44958	8.30585	8.70437
8.63951	9.66716	10.524	8.98276	10.3862	9.54701	13.479	9.92565	11.8332	7.58048		7.25471	5.51696	7.08292	6.04351	6.87253	8.04707	5.09223	4.46865	8.40546	8.56864
8.69388	9.74292	10.5822	8.93137	10.4048	9.72799	13.3908	9.74912	11.7771	7.21848		7.61502	5.49995	7.10607	6.17399	6.88829	8.14799	5.08186	4.45043	8.38155	8.54655
8.69131	9.59995	10.5949	8.68054	10.3213	9.939	13.5899	9.62089	11.7231	6.8368		7.66684	5.40777	7.06363	6.17955	6.8895	8.08184	5.14912	4.45211	8.41695	8.50625
8.6489	9.70011	10.5795	8.76849	10.316	9.61277	13.1689	9.73889	11.6322	6.82989		7.54981	5.2504	6.98378	6.29969	6.9353	8.08439	5.12878	4.48094	8.37016	8.6448
8.65396	9.62815	10.5598	8.47813	10.269	9.61405	13.5341	9.72878	11.658	6.79838		7.51217	5.20941	7.01017	6.23608	6.86319	8.23781	5.09082	4.45056	8.52797	8.71428
8.67633	9.81565	10.401	8.62834	10.2665	9.92149	13.5344	9.84076	11.7419	7.11818		7.55108	5.27804	7.0097	6.41994	6.90655	8.0775	5.20373	4.42747	8.35492	8.57247
8.59097	9.7533	10.5192	9.05068	10.3557	9.78767	13.4365	9.71288	11.6942	7.26441		7.4709	5.19123	7.0137	6.16646	6.86489	8.03908	5.07152	4.46905	8.49272	8.51095
8.58198	9.76933	10.4232	8.69334	10.2474	9.65322	13.4114	9.7017	11.8686	7.16551		7.79153	5.21902	7.00711	6.29907	6.87458	8.17559	5.14273	4.45068	8.49857	8.60349
8.75393	9.78805	10.4479	8.44869	10.3767	9.8729	13.3945	9.70376	11.721	7.28901		7.68304	5.22263	7.10304	6.29254	6.85861	8.09226	5.04301	4.42336	8.39542	8.64492
8.73002	9.76716	10.4963	8.54234	10.3047	9.64313	13.3278	9.64016	11.4589	7.4387		7.55393	5.31292	7.09046	6.28167	6.88241	8.06806	5.02161	4.44347	8.45737	8.61735
8.72203	9.58257	10.4965	8.43976	10.3118	9.86414	12.9401	9.98449	11.6254	6.92446		7.63579	5.40158	7.0646	6.22175	6.90583	8.15556	5.06968	4.49037	8.51325	8.62114
8.67211	9.57625	10.5203	8.09416	10.4461	9.60055	13.244	9.80088	11.6222	7.16081		7.61956	5.37078	7.0447	6.3133	6.82809	8.07604	4.98942	4.45313	8.37802	8.70641
8.70394	9.57714	10.5242	8.7458	10.3639	9.65952	13.3088	9.6662	11.4362	7.52469		7.45567	5.54905	6.98646	6.28469	6.86796	8.13505	4.96659	4.47809	8.43381	8.64982
8.72679	9.61701	10.4399	8.90314	10.3305	9.79279	13.32	9.78033	11.6886	7.38372		7.82559	5.48597	6.98575	6.19548	6.89789	8.0964	4.94442	4.42147	8.47199	8.56867
8.60617	9.58353	10.5056	8.9076	10.4108	9.64677	13.4118	9.71628	11.6691	7.01623		7.55658	5.50156	7.0447	6.18058	6.86196	8.07805	5.01797	4.41655	8.50103	8.65059
8.65287	9.6855	10.473	8.53745	10.4528	9.59708	13.4109	9.77118	11.4702	6.91746		7.75848	5.46842	6.91944	6.30064	6.87957	8.02771	4.99818	4.39668	8.42622	8.628
8.60325	9.52091	10.5882	8.7621	10.3686	9.55136	13.4684	9.57971	11.3595	7.57596		7.71664	5.52409	7.02554	6.03662	6.83199	8.12846	4.88874	4.42335	8.50616	8.4982
8.72486	9.86517	10.4167	8.76701	10.3725	9.56138	13.4108	9.87915	11.5876	7.03294		7.60651	5.58505	7.02458	6.1504	6.79401	7.99344	4.73963	4.44062	8.51914	8.65476
8.68016	9.78361	10.4444	8.87585	10.3379	9.74428	13.3629	9.64262	11.7493	6.95764		7.65427	5.55545	7.08239	6.06579	6.81347	8.02903	4.88636	4.38957	8.48951	8.67596
8.65593	9.91085	10.4877	8.87792	10.3775	9.7624	13.3591	9.62948	11.4953	6.98018		7.37426	5.59233	7.14588	6.32825	6.84884	7.9361	4.78561	4.41981	8.56286	8.53117
8.70588	9.81209	10.4976	8.71881	10.3618	9.77557	13.4189	9.70573	11.5818	7.53824		7.62787	5.55712	7.10348	6.15075	6.85207	7.99611	4.78007	4.38821	8.53482	8.60588
8.69342	9.84431	10.4738	8.46426	10.2588	9.78276	13.4512	9.86804	11.7596	7.3414		7.50397	5.63882	7.03977	5.99938	6.81607	7.96702	4.76066	4.40304	8.47359	8.63298
8.61992	9.7335	10.5368	8.52126	10.2735	9.66395	13.3952	9.78095	11.6383	6.98311		7.53495	5.59534	7.01948	6.07956	6.81584	8.09143	4.74795	4.40317	8.51708	8.64018
8.64464	9.84023	10.4149	8.79921	10.2934	9.58398	13.4385	9.72436	11.411	7.22332		7.44697	5.56788	7.08939	6.06147	6.82905	7.99699	4.77944	4.4318	8.57013	8.68792
8.65399	9.73643	10.4387	8.55312	10.2125	9.56771	13.3769	9.87105	11.8083	7.5521		7.68565	5.59679	7.05745	6.2856	6.81756	8.07118	4.76035	4.40868	8.63039	8.6355
8.68256	9.82035	10.4273	8.82638	10.2755	9.6746	13.3545	9.83361	11.751	7.14374		7.53385	5.6229	7.05358	6.32243	6.79698	8.05273	4.6753	4.38228	8.59409	8.58494
8.72267	9.72876	10.43	8.45692	10.1908	9.68391	13.3685	9.81601	11.4634	7.26517		7.60783	5.61087	7.01557	6.09026	6.81967	7.99863	4.83325	4.38687	8.6461	8.72236
8.68537	9.7696	10.4956	8.60069	10.2225	9.7309	13.2608	9.89097	11.6658	7.46078		7.47168	5.66337	7.05354	6.17545	6.87575	8.14882	4.84274	4.37554	8.61561	8.69624
8.67903	9.73771	10.442	8.53996	10.1319	9.67588	13.2301	10.0508	11.6757	7.54217		7.69593	5.67498	7.07322	6.1863	6.79864	8.06868	4.82637	4.40583	8.56711	8.5499
8.70254	9.55726	10.4261	8.82662	10.2421	9.80003	13.1059	10.0328	11.6515	7.34702		7.80083	5.7404	7.04681	6.28985	6.86668	8.14706	4.76429	4.40675	8.66529	8.58374
8.69346	9.81584	10.409	8.81987	10.1715	9.57865	13.1148	10.0846	11.5531	7.45943		7.64127	5.69249	7.15282	6.077	6.81494	8.24687	4.89844	4.41638	8.56189	8.66874
8.67021	9.76214	10.4518	8.45969	10.2675	9.52323	13.0275	10.0421	11.7581	7.39179		7.64711	5.66195	7.04109	6.12593	6.86928	8.26375	4.83821	4.38756	8.62532	8.66848
8.71281	9.70738	10.4378	8.70009	10.2158	9.56069	13.0449	9.96419	11.5289	7.12755		7.77231	5.66244	7.03237	6.23197	6.84328	8.24002	4.78118	4.38085	8.65499	8.64453
8.6976	9.61011	10.4377	9.24918	10.3053	9.62654	12.824	10.0423	11.4814	7.73801		7.56391	5.60119	7.08214	6.17839	6.81391	8.21571	4.85192	4.40137	8.69473	8.66329
8.74418	9.90585	10.4789	9.04815	10.2974	9.76581	13.1142	10.0447	11.7654	7.43002		7.72909	5.61726	7.00428	6.14062	6.86687	8.21368	4.86409	4.3696	8.68688	8.57971
8.71535	9.84361	10.4526	9.05583	10.2747	9.66267	13.1519	10.0739	11.6436	7.2991		7.59746	5.55379	7.07299	6.20081	6.82689	8.13339	4.84813	4.36556	8.59364	8.55874
8.64244	9.69688	10.3856	9.09439	10.3477	9.65543	13.3091	10.11	11.3392	7.37829		7.82258	5.57582	7.07574	6.30142	6.86462	8.25784	4.79048	4.33729	8.67758	8.64495
8.69753	9.66679	10.4352	9.26264	10.313	9.62645	13.2728	10.1336	11.6559	7.64757		7.64689	5.52479	6.94893	6.15465	6.77046	8.27326	4.82025	4.33779	8.64914	8.58896
8.64018	9.63314	10.5005	9.04921	10.2162	9.57807	13.3257	10.1194	11.7457	7.66679		7.38623	5.6179	7.04876	6.19769	6.82039	8.25542	4.811	4.32345	8.72675	8.63338
8.66702	9.70146	10.416	9.04252	10.2323	9.7819	13.3499	10.3206	11.6507	7.46431		7.79758	5.63407	7.14158	6.36848	6.86781	8.30646	4.93579	4.3022	8.75198	8.61245
8.66709	9.84172	10.4448	9.16472	10.2495	9.73391	13.1288	10.3854	11.3732	7.46709		7.53071	5.56496	7.09583	6.25271	6.807	8.27901	4.83368	4.33237	8.70829	8.59997
8.72915	9.73092	10.4861	9.08152	10.1886	9.64866	13.3294	10.2736	11.6285	7.42088		7.77458	5.48173	7.01102	6.24094	6.81623	8.10473	4.83771	4.33741	8.75084	8.6328
8.69577	9.66876	10.4167	9.29444	10.1786	9.69561	13.3374	10.2937	11.5936	8.2921		7.92951	5.39858	7.09274	6.20733	6.78989	8.09304	4.94707	4.31106	8.63527	8.63265
8.72449	9.74505	10.498	8.95384	10.1513	9.6975	13.2537	10.2668	11.5236	8.42392		7.64422	5.26182	7.0748	6.40236	6.85711	8.10764	4.88284	4.34197	8.74762	8.56826
8.74324	9.79958	10.4335	9.0951	10.1923	9.84231	13.2758	10.2191	11.6506	8.95028		7.72516	5.25762	7.08941	6.24528	6.7902	8.0585	4.92967	4.32688	8.69368	8.6321
8.64217	9.74194	10.4204	9.06384	10.198	9.58629	13.2342	10.1353	11.6066	8.67348		7.78333	5.22778	7.04949	6.28622	6.84251	8.05566	4.85488	4.32778	8.75281	8.58828
8.7599	9.75666	10.4115	9.19935	10.2624	9.72592	13.2403	10.0088	11.6081	8.79565		7.53864	5.21563	7.06371	6.25425	6.83434	7.9362	4.79921	4.34596	8.80983	8.67109
8.71632	9.83122	10.414	9.0574	10.1549	9.82288	13.2286	10.144	11.5763	8.71881		7.77365	5.10421	7.07876	6.3853	6.75744	7.9473	4.85492	4.32899	8.82134	8.64068
8.69286	9.74807	10.4084	8.84156	10.1943	9.72814	13.0723	9.9224	11.6519	8.69157		7.60334	5.18836	7.06377	6.14247	6.80776	7.99015	4.85131	4.32341	8.69107	8.74831
8.66869	9.83774	10.4259	8.8705	10.288	9.77795	13.2183	10.1106	11.621	8.71677		7.63599	5.25248	7.10739	6.32096	6.75352	7.99991	4.90448	4.33206	8.75869	8.69609
8.72174	9.86512	10.4337	9.22436	10.1717	9.79142	13.1418	10.0944	11.6216	8.7591		7.74723	5.28727	7.08576	6.30714	6.7935	8.01585	4.79008	4.35151	8.84711	8.70706
8.64569	9.83281	10.4302	9.05382	10.176	9.70081	13.0934	9.97731	11.7745	9.06904		7.75562	5.42138	7.02545	6.34817	6.75132	7.91477	4.84414	4.33093	8.88339	8.63644
8.75076	9.91994	10.4936	9.02036	10.2075	9.82331	12.9386	9.85885	11.7134	8.70098		7.83172	5.47231	7.07186	6.33912	6.8071	7.91674	4.9616	4.27804	8.81062	8.79348
8.72903	9.89646	10.3918	9.25605	10.155	9.80015	13.1431	9.88322	11.4097	8.76786		7.62045	5.5833	7.16061	6.28987	6.77612	7.92678	4.77212	4.31287	8.89204	8.64194
8.64663	9.87737	10.4032	8.9977	10.1951	9.89134	12.9673	9.98142	11.6242	8.61162		7.88438	5.61397	7.08245	6.23334	6.78643	7.92902	4.82839	4.27724	8.68868	8.69011
8.65408	9.91626	10.4205	8.87705	10.2193	9.85713	13.0972	10.037	11.58	8.15665		7.50813	5.58897	7.16165	6.41753	6.77531	8.01843	4.87478	4.33788	8.87362	8.64286
8.74099	9.90209	10.4016	9.02384	10.1756	9.8397	13.0865	9.93188	11.5479	8.13246		7.6384	5.59353	7.14378	6.17084	6.71798	8.01838	4.83026	4.33527	8.79714	8.66181
8.69478	9.79505	10.3867	9.1265	10.2146	9.74014	13.2272	9.89696	11.5638	7.59312		7.6696	5.62128	7.11945	6.28491	6.76415	7.95296	4.75748	4.34862	8.87481	8.76062
8.71898	9.82167	10.4345	8.85342	10.202	9.77512	13.0739	9.96214	11.658	7.59052		7.79599	5.66899	7.11094	6.30338	6.76256	7.82758	4.85854	4.34062	8.80741	8.66908
8.69834	9.87484	10.3062	9.08796	10.1555	9.66139	13.1751	9.99719	11.8358	7.38633		7.57575	5.58121	7.16947	6.21457	6.76825	7.81348	4.84894	4.32028	8.8177	8.61652
8.73448	10.0254	10.423	9.07315	10.1597	9.72813	13.2148	10.0365	11.6862	7.38575		7.78299	5.61935	7.15348	6.25296	6.64199	7.99076	4.83731	4.32547	8.77148	8.56452
8.69651	9.97525	10.4782	8.82172	10.0793	9.79255	12.9491	9.97371	11.691	7.42553		7.84524	5.59751	7.03431	6.27435	6.70928	7.93394	4.77399	4.33963	8.79843	8.74815
8.75475	9.6632	10.3823	9.0394	10.189	9.64552	13.1715	9.88621	11.563	7.04126		7.60056	5.65981	7.15964	6.40021	6.64987	7.95254	4.76678	4.3102	8.93697	8.65123
8.75103	10.0089	10.4636	9.16894	10.1738	9.49873	13.2499	9.95174	11.7305	7.33798		7.78716	5.6539	7.13396	6.34342	6.68199	7.93301	4.70049	4.34325	8.82125	8.65373
8.77294	9.74787	10.4088	8.95325	10.1728	9.70287	13.1981	10.1377	11.5958	7.82903		7.68201	5.59128	7.17028	6.20093	6.64407	7.9246	4.76665	4.32916	8.83924	8.64989
8.7551	9.50723	10.3941	8.96222	10.1994	9.57568	13.1554	10.0336	11.7566	7.32585		7.67807	5.6359	7.08269	6.25691	6.70155	8.04622	4.82369	4.30291	8.97079	8.67266
8.66375	9.89845	10.3226	8.9277	10.2462	9.5442	13.2051	10.0787	11.6372	7.016		7.8001	5.63338	7.03966	6.33166	6.6926	8.14778	4.77692	4.33103	8.82039	8.6895
8.80022	9.76124	10.3869	8.9268	10.2841	9.60739	13.0674	10.1111	11.5689	7.6535		7.77707	5.64424	7.15539	6.11995	6.67636	8.04294	4.70332	4.32743	8.86938	8.57589
8.73001	9.81366	10.3709	9.05549	10.2307	9.54327	13.0599	10.2018	11.6315	7.92741		7.66347	5.67703	7.1313	6.29216	6.68949	8.12601	4.8389	4.35119	8.95163	8.59465
8.66811	9.68165	10.4555	8.97109	10.1082	9.50171	13.2002	10.0608	11.7359	7.65199		7.78349	5.59344	7.06002	6.18128	6.66265	8.25531	4.77958	4.34107	8.8933	8.63458
8.73992	9.74239	10.4074	8.80643	10.1419	9.71546	13.1658	10.2987	11.5783	7.7581		7.96559	5.61485	7.13466	6.35969	6.65325	8.19095	4.72296	4.30911	8.96147	8.63327
8.66451	9.59586	10.3903	9.19668	10.2059	9.7363	12.8569	10.3225	11.6811	8.14534		7.84592	5.65169	7.19017	6.40038	6.69948	8.1631	4.78336	4.29613	8.81602	8.7164
8.75609	9.74886	10.4166	9.29394	10.2544	9.56116	13.0823	10.2032	11.6177	8.24079		7.75866	5.6879	7.11105	6.35257	6.66686	8.17523	4.90105	4.31283	8.92823	8.56829
8.67877	9.78597	10.3912	8.8753	10.175	9.62982	12.964	9.93106	11.5137	7.73933		7.97292	5.66256	7.10565	6.36001	6.66989	8.30375	4.76359	4.34567	9.00881	8.51962
8.73043	9.74206	10.3599	9.14081	10.1372	9.61315	12.973	10.1542	11.6813	7.47996		7.66816	5.63978	7.10864	6.28959	6.65472	8.2823	4.85201	4.33744	8.9625	8.5807
8.71444	9.71266	10.3947	8.9919	10.1072	9.73467	13.0782	10.146	11.4832	7.76285		7.76583	5.63536	7.14145	6.34893	6.68569	8.19342	4.77176	4.35556	8.99755	8.56931
8.72916	9.76057	10.3676	8.68355	10.2744	9.55704	13.0551	10.2165	11.6281	7.33736		7.66796	5.6612	7.10554	6.34107	6.66997	8.24872	4.77069	4.3211	8.88074	8.56831
8.82435	9.74542	10.4193	8.94308	10.193	9.5876	12.7618	10.2134	11.5235	7.55192		7.67302	5.43954	7.11872	6.24772	6.69204	8.12054	4.78474	4.33332	9.01831	8.54326
8.76209	9.79235	10.424	9.15215	10.1568	9.70495	12.9627	10.1774	11.6537	7.23325		7.77878	5.50186	7.05842	6.37569	6.67271	8.16695	4.7237	4.29388	9.02364	8.56701
8.75834	9.61634	10.3807	8.61918	10.2294	9.785	12.9308	10.3256	11.7234	7.73072		7.54777	5.38925	7.18807	6.21036	6.65576	8.05115	4.85226	4.30703	9.04486	8.52005
8.74832	9.9183	10.4439	8.79794	10.2801	9.73659	12.8063	10.3052	11.5437	7.65579		7.55646	5.42163	7.1924	6.42428	6.68396	8.01869	4.84818	4.32846	8.98399	8.59001
8.66531	9.74032	10.3655	9.05323	10.2706	9.67278	13.0781	10.1792	11.6101	8.46549		7.72464	5.56442	7.15521	6.20018	6.59563	7.88044	4.83722	4.26818	8.96665	8.61875
8.70855	9.87864	10.4582	8.99599	10.1418	9.70715	12.9373	10.096	11.6251	8.53386		7.70492	5.56527	7.11402	6.47244	6.56536	7.98989	4.78463	4.29716	9.0351	8.53368
8.75855	9.84696	10.3943	8.56373	10.182	9.61897	12.9643	10.2291	11.714	8.76815		7.57235	5.60883	7.0437	6.30745	6.55898	7.963	4.78961	4.27085	9.02152	8.57195
8.7614	9.8687	10.3385	8.7513	10.2673	9.62148	12.9994	10.2587	11.801	8.94327		7.61685	5.58657	7.06211	6.12118	6.56089	8.005	4.85173	4.26354	9.08038	8.57432
8.73988	9.8215	10.4843	8.82659	10.0442	9.7614	13.0154	10.3067	11.613	8.63781		7.65989	5.64662	7.12373	6.31942	6.62372	7.97031	4.83908	4.31356	9.1235	8.57697
8.78014	9.8492	10.3299	8.5731	10.0975	9.69371	12.8151	10.2598	11.5484	8.95417		7.70116	5.67432	7.05286	6.34507	6.56891	7.98678	4.95796	4.27005	9.06747	8.58835
8.81266	9.82462	10.438	8.54024	9.98178	9.62852	13.0511	10.089	11.7692	8.71223		7.48615	5.57488	7.16824	6.24972	6.60639	7.9522	4.77839	4.32625	8.98608	8.59622
8.72131	9.79154	10.3525	8.8765	10.123	9.80536	13.0881	10.0962	11.6382	9.02461		7.77508	5.64238	7.15265	6.20147	6.61581	8.02781	4.7853	4.26726	9.0361	8.63876
8.72102	9.82175	10.3853	8.53907	10.0633	9.74145	12.9256	10.3004	11.5775	8.88325		7.50337	5.636	7.13771	6.28167	6.60414	7.96234	4.90241	4.31895	9.05238	8.60984
8.69186	9.86445	10.497	8.47584	10.0564	9.7215	13.0046	10.0554	11.5857	8.55838		7.68716	5.65217	7.15937	6.33448	6.58782	7.98753	4.83364	4.25924	9.06232	8.57254
8.70405	9.968	10.4084	8.80515	10.0722	9.59594	13.0254	10.2213	11.6162	8.45113		7.60813	5.66933	7.12031	6.33119	6.59363	7.97337	4.72521	4.26874	9.08825	8.66011
8.74167	10.0714	10.373	8.75823	9.96381	9.84374	12.7936	10.0258	11.528	8.3873		7.79385	5.67276	7.08256	6.26582	6.57804	8.00015	4.8315	4.25859	9.08509	8.65736
8.78742	10.0552	10.4563	8.52846	10.1352	9.76983	12.9546	10.0815	11.7748	8.1195		7.6818	5.6594	7.13527	6.25161	6.55297	7.95921	4.83543	4.29516	9.05405	8.63656
8.76521	10.0472	10.4559	8.49365	10.088	9.98921	12.7751	9.94085	11.6529	8.36163		7.85921	5.62012	7.12198	6.31753	6.54415	7.97886	4.82703	4.29066	9.03203	8.63133
8.73661	10.0536	10.4036	8.6792	10.0253	9.83217	12.7888	10.1354	11.425	7.89039		7.66443	5.67715	7.13222	6.263	6.56001	7.97388	4.82639	4.23436	9.09693	8.5885
8.70838	10.0336	10.5183	8.38498	10.0222	9.73039	12.7797	9.99092	11.57	7.85282		7.48975	5.67197	7.11501	6.36179	6.50563	8.02054	4.89733	4.2506	9.07613	8.66401
8.74417	9.97092	10.5015	8.27414	9.9892	9.88589	12.8604	9.99976	11.6085	7.76157		7.68132	5.70603	7.12796	6.37906	6.56902	8.0179	4.83227	4.27926	9.04946	8.65104
8.65201	10.0543	10.3932	8.78439	10.0311	9.85292	12.7596	10.1571	11.5573	7.12205		7.61982	5.6161	7.18888	6.32363	6.48544	7.98456	4.76737	4.26526	9.09613	8.60802
8.76055	10.0422	10.4811	8.40396	10.0846	9.85898	12.7068	9.95344	11.5071	7.12881		7.78191	5.61259	7.0779	6.24245	6.5094	8.13819	4.80279	4.28954	9.00535	8.65625
8.80996	10.0427	10.4293	8.37316	10.0461	9.89	12.9156	10.0183	11.5538	7.30325		7.70071	5.65179	7.12771	6.31526	6.54829	8.16623	4.86827	4.26963	9.09024	8.62782
8.79241	10.0195	10.4177	8.48717	10.0796	9.83776	12.8263	9.88026	11.4773	7.21259		7.67688	5.64018	7.08095	6.38745	6.46088	8.22683	4.80611	4.29256	9.12407	8.63127
8.73417	9.98166	10.5617	8.63983	10.0789	9.80295	12.7225	9.86281	11.6012	7.36566		7.47596	5.65974	7.19277	6.40336	6.54906	8.13472	4.93949	4.31167	9.04624	8.66812
8.78244	9.99653	10.5081	8.35389	10.021	9.70681	12.8208	10.0361	11.6666	6.90585		7.82084	5.65667	7.09988	6.43721	6.49148	8.23173	4.86724	4.30251	9.06786	8.60904
8.7421	9.99211	10.3433	8.70825	10.0341	9.80716	12.7861	9.96342	11.3919	6.90785		7.50845	5.7011	7.14993	6.35766	6.53369	8.27953	4.86677	4.32116	9.14489	8.71404
8.82583	9.99474	10.5085	8.63295	10.0816	9.72505	12.6753	9.81903	11.535	6.89748		7.67586	5.75873	7.0883	6.39629	6.44517	8.23292	4.87681	4.26697	9.02096	8.69025
8.79497	9.9312	10.4334	8.27395	10.1055	9.69686	12.7747	10.043	11.7203	7.25652		7.8738	5.7332	7.03288	6.25163	6.52262	8.31087	4.8731	4.29457	9.08421	8.59831
8.78424	10.0292	10.4759	8.66464	10.0732	9.69163	12.8051	10.0436	11.8424	7.45045		7.77873	5.74184	7.13616	6.34975	6.43282	8.35752	4.81563	4.30027	9.11622	8.63365
8.75868	10.0181	10.5409	8.66898	9.9929	9.86838	12.7941	10.0778	11.5843	7.26115		7.50268	5.71927	7.09627	6.44502	6.5001	8.33835	4.83167	4.25745	9.10528	8.70672
8.72728	9.97717	10.4703	8.44787	10.0834	9.77759	12.7685	9.88169	11.7617	7.27827		7.62661	5.65332	7.12377	6.19234	6.47494	8.47687	4.69743	4.2213	9.12457	8.67442
8.71864	9.81934	10.5473	8.5393	10.0325	9.75318	12.754	9.90175	11.7251	7.27583		7.4289	5.50075	7.15585	6.34909	6.4823	8.35006	4.91064	4.2122	9.11463	8.61461
8.75406	10.0248	10.4712	8.39353	10.0895	9.85798	12.7476	10.033	11.7475	7.04937		7.84459	5.62286	7.16655	6.3074	6.40912	8.30977	4.70843	4.25388	9.21303	8.66292
8.80278	10.0491	10.4848	8.57677	10.0326	9.86539	12.7921	10.0522	11.8319	7.33967		7.59924	5.54186	7.10622	6.49561	6.4732	8.26368	4.83295	4.25489	9.10942	8.61083
8.75775	10.0899	10.5366	8.30899	10.0155	9.71159	12.8337	10.0055	11.5287	7.73273		7.82813	5.68045	7.13212	6.23665	6.39437	8.28179	4.83988	4.19847	9.10601	8.57309
8.80815	10.1098	10.4301	8.58155	10.0773	9.67845	12.7377	9.83898	11.7636	8.39474		7.48547	5.60996	7.11619	6.32393	6.44355	8.23364	4.73869	4.21648	9.10418	8.655
8.77984	10.0599	10.4276	8.74833	10.0744	9.8173	12.6629	10.0191	11.8368	8.85692		7.72924	5.68894	7.16102	6.25754	6.43013	8.14034	4.90956	4.23158	9.17694	8.62344
8.77508	10.0281	10.4306	8.27491	9.97891	9.78522	12.7615	10.0021	11.6733	8.95252		7.5905	5.69552	7.13405	6.31566	6.35611	8.20621	4.96879	4.23233	9.17496	8.59011
8.75993	10.1257	10.4969	8.64287	10.1113	9.8324	12.6005	9.99131	11.433	8.67768		7.81667	5.69255	7.16138	6.48479	6.41164	8.21431	4.70937	4.25259	9.12671	8.55353
8.84808	9.9847	10.4387	8.66032	9.94044	9.78927	12.3607	10.0576	11.513	8.69251		7.58348	5.67975	7.12686	6.43722	6.43127	8.0616	4.95197	4.24981	9.15717	8.66419
8.79539	10.0271	10.4535	8.6038	10.0273	9.85748	12.4895	10.1102	11.4632	8.87906		7.6713	5.68484	7.15181	6.36504	6.38851	8.10023	4.89587	4.22033	9.11522	8.69372
8.75953	10.0221	10.4078	8.65119	9.95298	9.81378	12.5859	10.0853	11.4041	8.97899		7.62234	5.7006	7.0897	6.40861	6.38629	8.1792	4.70319	4.22771	9.11756	8.65805
8.78693	10.0138	10.4486	8.68861	9.95095	9.89617	12.4437	10.0296	11.5861	8.77553		7.7336	5.65101	7.11367	6.49321	6.37934	8.09617	4.81651	4.22978	9.17995	8.69165
8.73716	9.92519	10.3861	8.6014	9.91373	9.8738	12.4817	10.1083	11.8665	8.2046		7.7463	5.67014	7.0225	6.48214	6.34779	8.03459	4.89393	4.20575	9.13355	8.6719
8.81188	10.0489	10.3917	8.4172	9.87437	9.77535	12.5183	10.3144	11.4123	8.55108		7.7451	5.6935	7.10943	6.38655	6.37569	8.05371	4.74446	4.21349	9.17973	8.68496
8.84488	9.94889	10.3892	8.45222	9.96969	9.77676	12.2863	10.0879	11.6264	8.16288		7.43634	5.67754	7.05735	6.57479	6.36576	8.16757	4.85671	4.21913	9.1173	8.71865
8.79668	10.0821	10.3938	8.42559	9.93815	9.83729	12.4753	10.1291	12.0953	7.9524		7.74115	5.64058	7.04536	6.30735	6.33153	8.0898	4.77701	4.26536	9.13336	8.67807
8.82436	9.97229	10.3591	8.43389	9.82945	9.88172	12.5841	10.1797	11.7227	8.2143		7.61057	5.6361	6.9774	6.42063	6.35812	8.11728	4.78796	4.21276	9.1324	8.6561
8.81633	9.99872	10.4863	8.42772	9.8729	9.85541	12.3936	10.3106	11.3658	7.97382		7.64175	5.66321	7.09194	6.40265	6.3046	8.13939	4.89304	4.22044	9.18283	8.68624
8.77929	10.0369	10.4956	8.61149	9.86177	9.78258	12.5331	10.1296	11.953	7.619		7.63819	5.67905	7.03587	6.28512	6.31092	8.01228	4.66532	4.19329	9.1942	8.71238
8.87917	10.051	10.4297	8.56683	9.98926	9.76983	12.6447	10.2276	11.9206	7.33546		7.73573	5.66992	7.10445	6.31743	6.31034	8.11585	4.68023	4.21126	9.17245	8.67407
8.80091	9.99239	10.4563	8.39902	9.84684	9.77593	12.3757	10.3809	11.6375	7.93821		7.53745	5.68238	7.05633	6.48004	6.35342	8.10548	4.69363	4.17193	9.11387	8.71413
8.7332	10.0395	10.3124	8.54978	9.82594	9.85514	12.6315	10.2129	11.7329	7.22284		7.75061	5.68035	7.12799	6.36429	6.35924	8.2003	4.66589	4.21456	9.10276	8.73832
8.75507	9.98019	10.4678	8.56007	9.91105	9.75424	12.4409	10.4412	12.031	7.58796		7.81894	5.61154	7.0871	6.16359	6.35397	8.2383	4.73863	4.19942	9.18524	8.56614
8.84976	10.0438	10.4454	8.63533	9.82563	9.82978	12.4448	10.2885	11.7886	7.22511		7.66367	5.55915	7.17503	6.5442	6.39844	8.10721	4.66069	4.17453	9.14999	8.67904
8.77703	9.95209	10.2903	8.49096	9.90126	9.82561	12.5686	10.2735	11.6005	7.12858		7.68899	5.52625	7.01084	6.44354	6.33897	8.18678	4.6233	4.24275	9.19182	8.63662
8.80225	10.0326	10.3791	8.67436	9.80118	9.88094	12.3611	10.3948	11.8357	6.74429		7.67528	5.52158	7.05278	6.44025	6.39791	8.24949	4.7881	4.19412	9.13005	8.61814
8.85224	10.0805	10.4149	8.40665	9.91131	9.92021	12.5077	10.1424	11.6107	7.12595		7.63193	5.41443	6.97791	6.37968	6.34128	8.18462	4.77614	4.17438	9.1872	8.72415
8.733	9.97889	10.4388	8.56229	9.86337	9.93916	12.3113	10.1733	11.5997	6.89114		7.55705	5.53219	7.17725	6.26832	6.30391	8.23403	4.72763	4.23388	9.11264	8.71888
8.83302	10.0664	10.4509	8.58379	9.90868	9.84333	12.616	10.1265	11.8458	7.32303		7.88366	5.53983	7.07336	6.42946	6.30092	8.16808	4.80555	4.22558	9.15961	8.61802
8.77614	10.0346	10.382	8.66657	9.92891	9.96493	12.3389	10.4223	12.0367	6.84527		7.56354	5.55306	7.06212	6.39426	6.36367	8.1477	4.81419	4.16619	9.22476	8.80249
8.82765	10.0413	10.4451	8.96206	9.88173	9.8401	12.5141	10.3943	11.8051	6.95715		7.38367	5.64963	7.09538	6.45215	6.35584	8.24833	5.04373	4.23383	9.24842	8.75783
8.86705	10.085	10.3918	8.99188	10.0404	9.85319	12.4561	10.3272	11.8176	7.23442		7.69711	5.74173	7.09106	6.37957	6.27984	8.24147	4.93135	4.2239	9.20412	8.74131
8.8271	10.1007	10.4141	8.79485	9.96836	9.85224	12.4237	10.3535	12.0003	7.56267		7.63901	5.71852	7.07467	6.57136	6.31089	8.33406	4.77012	4.20194	9.29327	8.63673
8.83194	10.1212	10.3489	8.85733	9.99352	9.89737	12.5423	10.3264	11.7996	7.83197		7.58281	5.72471	7.09201	6.49064	6.24321	8.18151	4.74892	4.23747	9.23828	8.7124
8.86424	10.0933	10.3288	8.95163	9.93153	9.79735	12.469	10.3368	11.748	8.84283		7.56462	5.77094	7.12866	6.40063	6.31281	8.23574	4.89864	4.25017	9.15783	8.75543
8.81726	10.0907	10.4289	8.58708	9.92782	9.78686	12.2814	10.4043	11.9344	8.84592		7.5641	5.71921	7.06055	6.55323	6.30957	8.24553	4.64414	4.22616	9.17264	8.60597
8.79185	10.2027	10.4259	8.74644	9.99395	9.88575	12.5589	10.3551	11.7225	8.27818		7.59997	5.79271	7.02585	6.46509	6.31597	8.26691	4.64312	4.22787	9.25759	8.63757
8.76162	10.1498	10.5032	9.02805	9.89195	9.92127	12.4878	10.4098	11.6829	8.40618		7.64521	5.76553	7.09101	6.33763	6.30706	8.19535	4.52717	4.25782	9.19232	8.6508
8.88361	10.1366	10.4206	8.9404	9.87279	9.92072	12.4096	10.3864	11.7708	8.64143		7.51674	5.77253	7.0803	6.33458	6.24736	8.216	4.62561	4.21748	9.21651	8.65377
8.78119	10.0939	10.3239	8.68083	10.0206	9.87967	12.3883	10.2453	11.7578	8.73581		7.6139	5.77285	7.05925	6.4333	6.27808	8.07112	4.55356	4.20576	9.27785	8.61532
8.76068	10.0125	10.2018	9.15529	9.96392	9.84685	12.4239	10.1636	11.8578	8.74762		7.60482	5.76137	7.1346	6.41456	6.22134	8.19065	4.50338	4.18575	9.25825	8.60089
8.82945	10.043	10.4098	8.9938	9.96664	9.92012	12.2936	10.2049	11.7589	8.37928		7.80929	5.69796	7.05681	6.30489	6.27443	8.21337	4.54192	4.21109	9.22106	8.6098
8.77712	10.1568	10.4623	8.85296	10.0604	9.81352	12.2927	10.1859	11.769	8.43872		7.57745	5.67441	7.10708	6.56026	6.26119	8.27447	4.75559	4.17951	9.19888	8.56024
8.78412	10.1016	10.2796	8.91942	10.0046	9.95091	12.3071	10.299	11.8147	8.13053		7.42682	5.72483	7.03963	6.43113	6.29368	8.30377	4.50085	4.20682	9.31132	8.63531
8.83975	10.1279	10.3986	9.12626	10.0802	9.85289	12.0979	10.2794	11.6959	8.00494		7.63867	5.76562	7.12009	6.5308	6.21362	8.18059	4.5143	4.19522	9.25884	8.65775
8.87096	10.0315	10.3354	8.93352	9.98095	9.9476	12.1184	10.2547	11.8404	8.03689		7.60003	5.75543	7.05182	6.53072	6.31613	8.26092	4.58686	4.23568	9.25202	8.61443
8.84843	10.0444	10.2952	8.87719	9.9862	10.0269	11.9517	10.1709	11.6857	8.08984		7.52327	5.74475	7.09542	6.49479	6.23173	8.38818	4.55956	4.23009	9.30042	8.66565
8.84824	10.0947	10.3315	9.13081	10.0659	9.94888	12.045	10.2529	11.7327	7.74177		7.43346	5.74312	7.0937	6.44222	6.28737	8.29209	4.38294	4.2376	9.28704	8.58863
8.82419	9.96696	10.3543	9.01838	9.93059	9.94482	12.0597	10.3699	11.8825	7.61851		7.34416	5.7335	7.1332	6.58616	6.29708	8.36077	4.6345	4.20979	9.28431	8.61724
8.83438	9.98645	10.3067	8.8073	9.89467	9.98508	12.1391	10.3266	11.7309	6.99895		7.62405	5.7005	7.05873	6.6478	6.22046	8.36008	4.63528	4.21975	9.27898	8.64932
8.79659	10.0502	10.403	8.91036	9.97655	9.89504	12.1537	10.1673	11.898	7.40903		7.48624	5.73421	7.16796	6.28933	6.27156	8.24396	4.53989	4.194	9.38051	8.62418
8.80119	10.0296	10.2922	8.96121	9.90808	9.95374	12.1281	10.2051	11.7988	7.45696		7.59522	5.70023	7.02809	6.56161	6.19817	8.19266	4.45134	4.23453	9.33598	8.61713
8.78688	10.0134	10.3968	8.89434	9.95138	9.98259	12.1495	10.2517	11.8637	7.1031		7.69143	5.74247	7.14468	6.42712	6.26808	8.18611	4.45207	4.17929	9.28807	8.68729
8.84085	9.99468	10.2531	8.81841	9.78287	9.83998	12.0765	10.1523	11.9499	6.902		7.59143	5.70038	7.09703	6.56738	6.31982	8.25193	4.51672	4.24621	9.38382	8.66455
8.75369	9.96581	10.2749	9.0662	9.98758	9.96303	12.2371	10.2574	11.791	7.19716		7.23859	5.66244	7.05351	6.46415	6.26057	8.27052	4.53759	4.16797	9.29272	8.55756
8.86072	9.8512	10.2931	8.8316	9.8456	9.99899	12.3642	10.2666	11.6123	7.28487		7.70661	5.60491	7.07462	6.49646	6.24292	8.18388	4.52758	4.16812	9.26233	8.5087
8.87846	9.96402	10.3779	8.8755	9.79774	9.98341	12.2066	10.2231	11.8224	7.037		7.59488	5.57399	7.0845	6.55581	6.23536	8.33989	4.53964	4.2214	9.33846	8.60575
8.89343	9.96221	10.2939	8.99604	9.92764	10.0504	12.4063	10.0641	11.7679	7.68113		7.32807	5.48746	7.10631	6.59267	6.24251	8.32241	4.66501	4.18568	9.33653	8.60243
8.79971	10.0612	10.3869	9.02082	9.81226	9.96786	12.2123	10.1835	11.6852	7.71422		7.56649	5.47597	7.11167	6.57592	6.22966	8.26835	4.56997	4.1956	9.27584	8.63788
8.82351	10.0765	10.3315	8.77845	9.96867	9.91967	12.22	10.3794	11.867	8.42286		7.54545	5.43923	7.12405	6.5365	6.22491	8.33389	4.66559	4.17221	9.32884	8.61816
8.83381	10.0632	10.3409	8.93215	9.91365	9.94996	12.2567	10.1806	11.9697	8.74591		7.3442	5.54184	7.10988	6.37754	6.22715	8.22646	4.61038	4.22497	9.39168	8.64989
8.86552	10.1262	10.3276	8.93318	9.8036	9.94511	12.1518	10.3515	11.775	8.70577		7.43597	5.5191	7.12662	6.4732	6.24514	8.27527	4.57281	4.15111	9.3325	8.55337
8.81482	10.0928	10.2736	8.80284	9.94157	10.0044	12.1969	10.1809	11.8423	8.57442		7.40487	5.6025	7.06413	6.38055	6.20889	8.19634	4.55625	4.2015	9.3298	8.67832
8.86889	10.046	10.2782	8.95201	9.78415	9.97166	12.137	10.2433	11.7005	8.79893		7.72389	5.5976	7.07152	6.38063	6.28057	8.33114	4.61195	4.16683	9.34444	8.60553
8.89292	9.99137	10.3594	8.78394	9.90883	10.0445	12.0823	10.32	11.8061	9.02127		7.51757	5.62102	7.05623	6.36972	6.21778	8.30063	4.50272	4.19015	9.38985	8.67825
8.86844	10.0279	10.3375	8.97203	9.80659	9.92131	12.1768	10.2556	11.861	8.4196		7.50098	5.6736	7.08242	6.55945	6.26535	8.45562	4.57628	4.22954	9.38912	8.67041
8.81239	10.011	10.3536	8.74896	9.83826	9.83825	12.2031	10.1042	11.7544	8.66077		7.28734	5.69122	7.12074	6.68709	6.14475	8.39399	4.53136	4.20166	9.33501	8.70629
8.90389	10.0869	10.3202	8.91147	9.84275	10.0629	12.0285	10.2976	11.8133	8.81615		7.4499	5.72604	7.10037	6.40399	6.20029	8.3349	4.5768	4.20557	9.3629	8.73755
8.8523	10.1493	10.3912	8.92042	9.83588	9.89599	12.0779	10.236	11.7953	8.68903		7.50995	5.69143	7.10635	6.47369	6.18991	8.3335	4.39572	4.21011	9.28283	8.70049
8.80948	10.1475	10.3182	8.94424	9.90687	9.95957	11.8377	10.2688	11.8002	8.18722		7.53262	5.70452	7.07462	6.43884	6.17153	8.2973	4.5141	4.16654	9.40991	8.58344
8.90506	10.1998	10.332	8.75272	9.85831	10.0602	11.9607	10.3061	11.729	8.07919		7.65838	5.68486	7.12834	6.42953	6.23104	8.24	4.84934	4.19084	9.3916	8.66378
8.88192	10.0932	10.3709	8.71554	9.81672	10.0656	11.8326	10.2064	11.7576	8.04274		7.68213	5.69965	7.03307	6.48869	6.2073	8.35931	4.55343	4.20406	9.36093	8.68627
8.8599	10.0672	10.3925	8.75683	9.88638	10.0481	11.9009	10.397	11.8426	7.59084		7.69125	5.67725	7.10593	6.44305	6.20545	8.31371	4.56951	4.18982	9.32817	8.7421
8.81592	10.165	10.2341	8.76186	9.82033	10.0111	11.9228	10.3779	11.7462	8.1386		7.67772	5.67456	7.06527	6.62994	6.16657	8.25589	4.58298	4.19135	9.35671	8.75248
8.86013	10.1153	10.3553	8.9151	9.84204	9.99112	11.8727	10.2853	11.8419	7.34572		7.5573	5.72157	7.08146	6.4387	6.29322	8.29015	4.60294	4.22025	9.30605	8.73714
8.8266	10.1764	10.2942	8.69255	9.96261	9.93466	11.9571	10.407	11.8136	7.69954		7.22586	5.68597	6.95189	6.55214	6.21962	8.3094	4.51809	4.18631	9.335	8.72365
8.82159	10.1244	10.3291	8.7982	9.77311	10.0549	11.916	10.3942	11.7012	7.58521		7.64338	5.75752	7.001	6.50371	6.21347	8.19276	4.4489	4.19812	9.36609	8.6343
8.84987	10.2086	10.2716	8.9202	9.78833	9.94216	11.6879	10.3505	11.7952	7.62573		7.63885	5.74655	7.16511	6.57219	6.19506	8.15985	4.73561	4.15556	9.37777	8.65961
8.84101	10.1397	10.458	8.86586	9.92582	9.98868	12.0105	10.5442	11.9582	7.25521		7.63713	5.77189	7.07103	6.52271	6.24842	8.2431	4.55939	4.20527	9.29833	8.72521
8.91849	10.1596	10.377	8.84875	9.76048	9.93381	11.881	10.4584	11.9379	7.73003		7.55388	5.80723	7.06365	6.51154	6.18474	8.21443	4.56709	4.17443	9.35782	8.55895
8.84624	10.1577	10.2202	8.76568	9.87909	10.0447	11.9675	10.4006	11.8336	7.9053		7.6463	5.8507	7.10695	6.38984	6.1621	8.18418	4.49697	4.17315	9.4281	8.67524
8.86577	10.1367	10.2819	8.8746	9.80194	10.0161	11.9622	10.4606	11.8025	8.19429		7.51478	5.8046	7.02925	6.43435	6.18	8.19751	4.68883	4.18088	9.39319	8.59468
8.85879	10.0595	10.2814	8.83256	9.82697	10.0243	11.9252	10.3997	11.7654	8.49194		7.43209	5.84091	7.06444	6.47387	6.16589	8.24713	4.75345	4.18744	9.34826	8.70776
8.80623	10.1702	10.3723	8.87679	9.94085	10.0688	11.8438	10.5948	11.8129	8.87371		7.38871	5.83998	7.05325	6.45759	6.23081	8.31877	4.66335	4.21999	9.45863	8.62298
8.89056	10.0964	10.3	8.91832	9.86398	10.0724	11.8208	10.472	11.8302	8.41741		7.38485	5.55693	7.08707	6.57541	6.29074	8.24616	4.49473	4.19053	9.36601	8.56646
8.79922	10.1161	10.3436	8.82759	9.79701	10.0459	11.6928	10.6576	11.7364	8.71613		7.62483	5.6905	7.01164	6.53956	6.16226	8.21529	4.56071	4.17785	9.36402	8.74594
8.87045	10.0581	10.379	8.9715	9.83904	10.0437	11.897	10.6803	11.8056	8.26808		7.54005	5.60079	7.14341	6.45709	6.22847	8.18906	4.92093	4.1338	9.35554	8.70148
8.77514	10.029	10.3201	8.85043	9.7933	10.0397	11.8741	10.5815	11.8346	8.52585		7.67501	5.64448	6.99703	6.51754	6.22258	8.2439	4.74275	4.18362	9.35037	8.69765
8.86745	10.0595	10.245	8.99367	9.87855	10.1844	11.8982	10.7445	11.8844	8.3919		7.27409	5.68149	7.02417	6.58644	6.27871	8.27715	4.65887	4.18486	9.33609	8.61369
8.92114	10.1459	10.2785	8.82588	9.79849	10.1148	11.8443	10.612	11.7546	8.4984		7.32383	5.7598	6.98868	6.46654	6.14689	8.27568	4.60782	4.18923	9.31905	8.64231
8.83859	9.9508	10.3257	8.73092	9.85731	10.0941	11.905	10.6758	11.7893	8.4644		7.2923	5.72513	7.1142	6.61014	6.21687	8.43233	4.7448	4.22895	9.34634	8.61354
8.92775	10.0587	10.3141	8.75078	9.81751	10.1767	11.6434	10.769	11.6487	8.13925		7.39642	5.79678	7.06427	6.4684	6.13858	8.43254	4.74742	4.18505	9.37782	8.58817
8.84916	9.92515	10.2434	8.85434	9.70353	10.0961	11.726	10.6969	11.8236	8.25554		7.61143	5.80035	7.07562	6.5989	6.06942	8.44277	4.53063	4.17587	9.36087	8.59057
8.89879	9.98519	10.3306	8.89737	9.82478	10.2325	11.7653	10.7582	11.8238	8.40466		7.30975	5.76891	7.07785	6.45748	6.18074	8.41488	4.61298	4.16929	9.30815	8.70988
8.83057	10.0569	10.3374	8.66514	9.73614	10.1602	11.7903	10.7683	11.8863	8.16788		7.50205	5.79265	7.05944	6.52439	6.19295	8.37274	4.84393	4.18449	9.27393	8.5664
8.83428	9.98632	10.2861	9.0318	9.79392	10.256	11.5016	10.8936	11.9653	8.36288		7.78048	5.85891	7.05568	6.6097	6.15765	8.36365	4.59929	4.20646	9.31253	8.66173
8.86404	10.0184	10.2069	8.75072	9.68805	10.0336	11.8317	10.7657	11.9712	8.20331		7.59228	5.78706	7.10588	6.41727	6.16696	8.33157	4.59533	4.15548	9.37559	8.57229
8.88324	10.0147	10.2582	8.57971	9.75757	10.0977	11.6033	10.8358	11.7753	8.19534		7.51237	5.79071	7.03571	6.39736	6.16445	8.36978	4.64415	4.17987	9.28303	8.6943
8.92998	10.0728	10.2711	8.83469	9.82483	10.0708	11.7378	10.8993	11.8382	8.01547		7.51008	5.81011	7.06935	6.52278	6.11443	8.3614	4.58185	4.14523	9.33474	8.54157
8.86115	10.0787	10.3758	8.89711	9.78421	10.001	11.7021	10.9227	11.8501	7.95694		7.6157	5.79097	7.1235	6.48055	6.1675	8.37522	4.4076	4.14241	9.34143	8.59724
8.87852	10.0648	10.3468	8.68642	9.77961	10.0854	11.747	10.8655	11.85	7.95313		7.61471	5.7679	7.0444	6.5328	6.23057	8.4786	4.44418	4.18413	9.36452	8.57477
8.81278	9.99189	10.3069	8.65095	9.73284	10.0458	11.4933	10.8295	11.9009	8.04466		7.37391	5.76624	7.08314	6.54241	6.24113	8.49741	4.61505	4.17147	9.3493	8.6004
8.84091	10.0593	10.2453	8.88469	9.88301	10.0573	11.6771	11.0329	11.834	8.3537		7.53586	5.7884	7.04284	6.51722	6.17128	8.33312	4.34726	4.17857	9.3928	8.59045
8.86097	10.0343	10.2793	8.67249	9.8859	10.0487	11.706	10.808	11.9509	8.5797		7.28407	5.7939	7.09532	6.42649	6.223	8.44498	4.40514	4.17944	9.32146	8.63538
8.87359	10.2052	10.3046	8.87362	9.88559	10.0747	11.5624	11.0225	11.7814	8.65548		7.75923	5.81783	7.0176	6.59729	6.17022	8.29029	4.54976	4.19126	9.41057	8.54606
8.88655	10.1447	10.3079	8.81985	9.8692	10.2501	11.6422	10.9973	11.743	8.26415		7.70169	5.79637	7.04587	6.63646	6.16275	8.37632	4.38217	4.1703	9.42537	8.51308
8.83905	10.1867	10.1966	8.74777	9.81804	10.0719	11.6313	10.971	11.7786	8.34		7.42453	5.80701	6.96352	6.6686	6.15172	8.42208	4.37804	4.15832	9.40279	8.53469
8.89163	10.0814	10.2823	8.70782	9.82442	10.172	11.5861	10.9223	11.8358	8.61014		7.65521	5.71797	7.0366	6.50113	6.15152	8.30186	4.33549	4.19808	9.39206	8.61881
8.88519	10.1557	10.1971	8.8552	9.81858	10.1329	11.5799	10.8889	11.8351	8.37124		7.58076	5.75175	7.00667	6.47168	6.14659	8.34352	4.41878	4.20728	9.33621	8.5649
8.78302	10.214	10.2555	8.85041	9.72888	10.1982	11.6199	10.9953	11.8094	8.29758		7.29084	5.71381	7.03006	6.51005	6.20022	8.31396	4.4933	4.175	9.38271	8.57273
8.81187	10.1244	10.2593	8.69907	9.75454	10.1553	11.5517	10.9049	11.8136	8.4327		7.2804	5.58974	7.05893	6.5204	6.13188	8.27592	4.37419	4.19914	9.35778	8.58656
8.90538	10.1675	10.2455	8.67986	9.87402	10.1188	11.4883	11.0071	11.7419	8.20837		7.52233	5.67825	7.04166	6.59099	6.2714	8.28369	4.58331	4.20801	9.33369	8.6158
8.84529	10.163	10.1477	8.73046	9.83646	10.1377	11.4952	10.9697	11.7249	8.14029		7.33598	5.65781	7.10156	6.75428	6.19104	8.37674	4.55328	4.15878	9.35607	8.57528
8.90165	10.2037	10.2553	8.86365	9.9323	10.2212	11.3863	11.0001	11.7904	8.2191		7.4082	5.75524	7.11526	6.74119	6.17326	8.44255	4.56459	4.21347	9.28171	8.6977
8.86062	10.1739	10.2456	8.85252	9.79916	10.2519	11.3186	11.0094	11.8553	8.07652		7.3417	5.70418	7.01869	6.53723	6.13916	8.36464	4.39085	4.16935	9.31019	8.56064
8.91741	10.1664	10.4	8.81936	9.78668	10.1582	11.3347	10.9776	11.8296	8.09591		7.64926	5.77715	7.09746	6.61503	6.24829	8.33305	4.55504	4.15993	9.36466	8.61769
8.88064	10.2648	10.1869	8.72453	9.83941	10.0162	11.4123	11.1403	11.8417	7.75168		7.1759	5.79482	7.05324	6.65742	6.16315	8.42673	4.40892	4.19269	9.32317	8.58874
8.83972	10.1907	10.2307	8.838	9.94241	10.1929	11.3696	11.0438	11.7563	7.80341		7.6172	5.76678	7.04668	6.68151	6.23041	8.42665	4.52744	4.22288	9.27822	8.69255
8.82586	10.0524	10.272	8.94502	9.86248	10.096	11.3767	11.1085	11.8815	8.03949		7.36639	5.84117	7.074	6.72171	6.15892	8.36089	4.56739	4.11501	9.26076	8.58482
8.86741	10.1184	10.2198	8.90988	9.76676	10.0465	11.4022	10.9578	11.9227	8.56044		7.50073	5.76777	6.99248	6.63477	6.163	8.32207	4.50745	4.20843	9.25569	8.6635
8.89973	10.1178	10.2764	8.62797	9.83718	10.0346	11.414	11.0183	11.8283	8.44012		7.39967	5.82798	7.02854	6.48791	6.17277	8.33748	4.35924	4.14546	9.22807	8.60361
8.85223	10.08	10.168	8.76301	9.76495	10.2543	11.4221	11.0978	11.7693	8.39312		7.19206	5.82016	7.11488	6.55694	6.2119	8.29246	4.46717	4.16786	9.2947	8.57288
8.9513	10.0697	10.1891	8.78623	9.86968	10.0049	11.4041	11.0114	11.7514	8.28476		7.36968	5.87684	7.0614	6.44535	6.19543	8.3399	4.5854	4.13111	9.2549	8.58702
8.92123	10.1134	10.2898	8.75578	9.75503	10.2166	11.4346	11.0364	11.8646	8.36853		7.44473	5.83654	7.03409	6.47265	6.09349	8.31972	4.37361	4.18318	9.2648	8.65298
8.83574	10.0386	10.2494	8.76153	9.77246	10.1556	11.3904	11.01	11.8819	8.22964		7.35452	5.79901	7.0359	6.50245	6.20509	8.28356	4.3239	4.14297	9.24508	8.53631
8.93388	10.0072	10.2882	8.81902	9.6753	10.1518	11.4819	10.9538	11.8437	8.26997		7.52572	5.85235	7.04216	6.53663	6.18154	8.2713	4.48194	4.19806	9.18898	8.56283
8.8539	10.1164	10.1401	8.6788	9.73186	10.0052	11.2675	11.0278	11.732	8.62153		7.65677	5.85315	7.0544	6.46891	6.20777	8.32355	4.4876	4.16883	9.22002	8.64248
8.81657	10.0688	10.1942	8.71116	9.73116	10.1511	11.2567	10.877	11.8156	8.09975		7.41719	5.85405	7.13862	6.58714	6.12769	8.31463	4.44034	4.17774	9.19547	8.61684
8.86291	9.99911	10.2561	8.92249	9.72447	10.0112	11.3228	10.8579	11.8407	8.20557		7.37397	5.8918	7.05879	6.58078	6.13489	8.46088	4.50762	4.17239	9.21533	8.55366
8.85788	10.015	10.206	8.87703	9.69973	10.1182	11.331	10.8764	11.8246	8.23181		7.61193	5.87594	7.00959	6.63754	6.19109	8.46078	4.49904	4.16032	9.18598	8.52065
8.9441	9.99552	10.3495	9.00134	9.7482	10.1385	11.1245	10.8769	11.7808	8.33099		7.48645	5.80778	7.01816	6.45161	6.19659	8.40035	4.43816	4.17377	9.20363	8.53392
8.84588	10.0328	10.2301	8.85117	9.78563	10.0145	11.207	10.887	11.7546	8.20128		7.41071	5.73988	7.07038	6.59118	6.10922	8.43314	4.44722	4.20115	9.2067	8.5845
8.90668	10.0987	10.2779	8.96755	9.84574	10.2809	11.1784	10.9371	11.8853	8.40594		7.71316	5.79216	7.00354	6.65372	6.16593	8.33108	4.54727	4.20106	9.26514	8.51438
8.96317	10.1561	10.2372	8.73867	9.79941	10.1344	11.1803	10.7969	11.7812	8.45332		7.42496	5.77321	6.98901	6.47459	6.2461	8.26908	4.50817	4.22198	9.19892	8.53426
8.87809	10.0965	10.211	8.95045	9.68435	10.2	11.0369	10.7355	11.6898	8.27153		7.27011	5.81137	7.10212	6.42988	6.2226	8.30269	4.40491	4.17769	9.21248	8.63071
8.93783	10.0891	10.2868	8.88261	9.76474	10.1286	11.061	10.8543	11.8448	8.32628		7.5427	5.82295	7.03381	6.59055	6.23206	8.38987	4.46587	4.18027	9.25029	8.61194
8.88572	10.1317	10.1685	8.80316	9.73212	10.0105	11.0968	10.7485	11.7212	8.34641		7.27838	5.79376	6.91962	6.478	6.1559	8.36401	4.65543	4.22851	9.18937	8.52319
8.93004	10.2111	10.1717	8.80347	9.80976	10.0578	11.005	10.8448	11.9041	8.24691		7.58504	5.83931	7.07013	6.54474	6.16035	8.3973	4.54371	4.11701	9.16874	8.59811
8.85795	10.1496	10.2094	8.93161	9.76018	10.0977	11.0206	10.7493	11.8913	8.40382		7.49953	5.87837	7.06242	6.48093	6.09754	8.52572	4.53226	4.20832	9.20595	8.57565
8.87143	10.1973	10.2256	8.97585	9.6701	9.966	11.0593	10.8095	11.6903	8.16469		7.31458	5.88145	7.0404	6.52473	6.22401	8.52711	4.53123	4.19757	9.16368	8.62647
8.82137	10.1099	10.2307	8.97675	9.75504	10.0799	11.0852	10.7346	11.6941	8.03508		7.22051	5.86296	7.01642	6.70494	6.1559	8.45589	4.56498	4.13669	9.24993	8.51529
8.89679	10.1932	10.1412	8.97146	9.78187	10.0961	11.0537	10.7765	11.7869	8.29133		7.58054	5.91901	6.94451	6.65646	6.15989	8.44151	4.63114	4.20011	9.1821	8.57165
8.89282	10.0868	10.1255	8.97613	9.81301	10.1756	11.1276	10.6329	11.7366	8.1953		7.37208	5.92676	7.00024	6.43859	6.15867	8.44796	4.51151	4.17746	9.23451	8.62708
8.86389	10.1629	10.2004	8.88525	9.80167	10.0726	11.1841	10.8234	11.8626	7.96462		7.62413	5.89984	7.01957	6.56543	6.16453	8.39049	4.31722	4.16658	9.22189	8.5625
8.93521	10.1927	10.2025	8.93669	9.82819	10.0747	11.1945	10.6676	12.0224	8.23179		7.41871	5.9263	7.06742	6.50033	6.13056	8.45328	4.40425	4.11698	9.22653	8.55886
8.91323	10.1741	10.2409	8.78845	9.68159	10.1816	11.1211	10.7223	11.8364	8.07964		7.60342	5.88437	6.96355	6.56232	6.2159	8.54981	4.38952	4.15041	9.19308	8.4283
8.84024	10.1173	10.2125	8.90007	9.73041	10.0595	11.1499	10.7273	11.8421	8.13319		7.23444	5.92999	7.05065	6.66496	6.14382	8.4478	4.43315	4.14473	9.26494	8.66737
8.923	10.1273	10.1492	9.02111	9.90853	10.1017	11.0818	10.7407	11.9723	8.12291		7.29397	5.88618	6.99253	6.57791	6.1952	8.37209	4.31358	4.13521	9.1756	8.50872
8.8816	10.0351	10.2439	8.90971	9.83647	10.1251	11.1792	10.7896	11.8854	8.25275		7.54564	5.95506	6.96163	6.54255	6.20643	8.36391	4.35251	4.17143	9.18534	8.58591
8.93483	10.1065	10.1288	9.10547	9.79167	10.0294	11.1555	10.7815	11.7558	7.94422		7.30525	5.93617	7.04334	6.35826	6.1309	8.36893	4.46216	4.21868	9.23293	8.43091
8.89026	10.0544	10.0741	8.92838	9.65573	10.0596	11.0733	10.7385	11.7938	7.85648		7.20367	5.95176	6.96884	6.47733	6.14293	8.28039	4.34447	4.16906	9.23862	8.55618
8.95179	10.042	10.1247	8.93518	9.72922	10.1048	10.9798	10.775	11.6973	7.97011		7.31773	5.96506	6.94426	6.59766	6.12783	8.31931	4.39715	4.17684	9.21614	8.55579
8.87058	10.0191	10.1651	8.9153	9.75979	10.1678	10.9772	10.7411	11.8039	8.06537		7.56828	5.95934	7.04629	6.55791	6.16989	8.39218	4.4583	4.18733	9.18122	8.44298
8.84474	10.075	10.0957	8.91517	9.76862	10.1421	11.0175	10.8201	11.7114	8.24875		7.37022	5.96011	7.01664	6.46674	6.14824	8.3238	4.3968	4.19104	9.17834	8.56005
8.81881	10.1046	10.1764	9.08816	9.77977	10.1339	11.1186	10.7115	11.8259	8.14809		7.24588	5.95923	6.96663	6.45283	6.13103	8.38562	4.34972	4.19521	9.15077	8.50368
8.82852	10.0616	10.105	8.80279	9.73897	10.0835	11.1455	10.8213	11.7577	8.07985		7.29604	5.94108	6.97596	6.37878	6.17231	8.2817	4.44869	4.16664	9.08882	8.61377
8.92788	10.118	10.0363	8.94384	9.82439	10.0549	10.9647	10.8657	11.9464	8.0597		7.40722	5.95512	6.93593	6.54103	6.18635	8.3097	4.35518	4.14839	9.20976	8.4902
8.84499	10.1181	10.2097	8.8857	9.83174	10.0896	11.186	10.836	11.9353	8.25621		7.42516	5.97122	7.09647	6.46403	6.21008	8.24019	4.51284	4.19031	9.17273	8.44782
8.892	10.0922	10.0959	9.023	9.72312	10.0197	11.0093	10.7607	11.889	8.21592		7.36651	5.89217	7.05023	6.53895	6.09982	8.17789	4.46522	4.18948	9.16839	8.48615
8.9236	10.094	10.1666	8.86677	9.78755	10.1114	10.9446	10.8283	11.8504	8.30465		7.15191	5.85604	7.05006	6.45859	6.09586	8.2075	4.34699	4.15178	9.21604	8.42706
8.93474	10.0482	10.2846	8.91767	9.71865	9.99834	11.0235	10.8582	11.809	8.28358		7.43474	5.94379	7.08462	6.55465	6.21532	8.30139	4.47121	4.16318	9.17231	8.5319
8.90206	10.1228	10.2847	8.84062	9.75052	10.112	10.997	10.8717	11.8625	8.30598		7.35606	5.9798	7.01634	6.50381	6.14697	8.2083	4.31749	4.14196	9.13779	8.42663
8.90588	10.1156	10.0386	8.99002	9.78215	9.99611	10.9855	10.8131	11.65	8.07142		7.24979	5.95566	7.02196	6.5783	6.13691	8.1937	4.33279	4.16	9.1601	8.49004
8.8689	10.197	10.2757	8.9126	9.68728	10.058	10.9205	10.8835	11.8689	8.00811		7.38606	6.07301	6.98319	6.52101	6.13365	8.21137	4.43259	4.13686	9.12373	8.44143
8.86861	10.1494	10.1809	8.87301	9.74012	10.0938	11.0701	10.9023	11.7175	8.17992		7.45165	6.05798	6.93398	6.403	6.1818	8.22108	4.38839	4.12487	9.13255	8.43791
8.89461	10.1618	10.1573	9.06216	9.69252	9.95005	10.9526	10.9668	11.9523	8.23325		7.30165	6.06007	7.02171	6.56272	6.1701	8.24917	4.49931	4.15784	9.10234	8.39115
8.97308	10.1522	10.1557	8.72854	9.88098	10.032	10.9688	11.073	11.939	8.20649		7.29119	6.11956	6.99289	6.67969	6.17282	8.40968	4.49622	4.15563	9.11213	8.51754
8.95505	10.1237	10.1949	9.05522	9.70606	10.1401	11.0097	10.9363	11.9172	8.22339		7.30638	6.06748	6.90589	6.62887	6.26683	8.34469	4.55412	4.13106	9.10814	8.36663
8.87225	10.1441	10.1661	9.08776	9.76118	10.0176	10.8685	11.0304	11.7354	8.02136		7.42786	6.0974	6.95343	6.66143	6.22553	8.3478	4.46563	4.10547	9.14646	8.4279
8.93378	10.174	10.1305	8.92028	9.65347	10.014	10.9642	10.9306	11.7712	8.25976		7.18031	6.16046	6.99214	6.67276	6.18836	8.3446	4.45884	4.12224	9.10533	8.45991
8.90977	10.1364	10.1981	9.04086	9.62099	10.0413	10.911	11.0642	11.8304	7.9161		7.33988	6.19904	7.01547	6.62131	6.11541	8.28644	4.57431	4.15817	9.11004	8.40193
8.863	10.134	10.1459	8.99008	9.71761	9.94895	10.8525	10.902	11.8216	8.11803		7.6012	6.1185	7.02419	6.6927	6.10813	8.26563	4.54073	4.11528	9.14058	8.53616
8.93184	10.1248	10.1851	8.90252	9.69557	9.97532	10.9415	11.0009	11.947	8.36905		7.43368	6.11105	6.93809	6.69004	6.10257	8.26922	4.61813	4.16654	9.22223	8.4695
8.92411	10.0974	10.1618	8.84967	9.6941	10.0049	10.8772	11.0274	11.8218	8.26484		7.2691	6.13454	6.97682	6.83307	6.14314	8.27832	4.71566	4.08879	9.22443	8.38668
8.95718	10.0886	10.1429	8.86239	9.74673	9.9608	10.9382	11.2083	11.8032	8.07741		7.67695	6.11761	6.97123	6.78019	6.15913	8.25767	4.64209	4.14904	9.19638	8.39103
8.89575	10.064	10.1092	8.9471	9.77418	10.1292	10.8309	11.1579	11.9477	8.01629		7.48015	6.14229	7.02174	6.77359	6.10135	8.21927	4.47384	4.17175	9.18845	8.37096
8.89975	10.1062	10.2504	9.03349	9.70139	10.091	10.8489	11.1107	11.7031	7.99639		7.26894	6.13622	7.00023	6.69258	6.15581	8.23635	4.39632	4.10627	9.23452	8.38033
8.90754	9.99168	10.0637	8.89078	9.78613	10.1325	10.7954	10.9999	11.9221	7.81708		7.36699	6.1188	6.99311	6.73004	6.20758	8.23021	4.41173	4.13369	9.21757	8.42169
8.91537	10.056	10.2127	8.76469	9.77825	10.0623	10.7478	11.0043	11.7455	8.1151		7.3032	6.08322	7.01193	6.82202	6.19746	8.25128	4.51153	4.12647	9.17179	8.52661
8.95582	10.0684	10.2144	9.08353	9.76897	9.96542	10.7511	11.0459	11.7814	7.85482		7.68699	6.06574	7.05669	6.59795	6.12729	8.28438	4.27147	4.15102	9.2291	8.52493
8.88972	10.1034	10.1984	8.75333	9.66164	10.0041	10.7757	11.1434	11.6677	7.94002		7.57477	6.11519	6.96672	6.86531	6.1763	8.24645	4.51449	4.13735	9.22718	8.47797
8.86953	10.1953	10.208	8.80936	9.59954	10.043	10.7506	11.1265	11.8882	7.83767		7.37012	6.08752	7.05907	6.83586	6.14833	8.18531	4.35951	4.13001	9.1908	8.35364
8.9514	10.1536	10.2027	8.95217	9.62693	9.99448	10.5553	11.146	11.9747	7.93926		7.46812	6.10501	6.93779	6.81459	6.07315	8.24258	4.26136	4.10931	9.23296	8.48405
8.97682	10.1984	10.2196	8.72878	9.54546	10.0264	10.8679	11.1197	11.8758	7.77739		7.29042	6.10137	7.03071	6.47869	6.14304	8.22468	4.38325	4.13346	9.17845	8.51377
8.89448	10.2561	10.1613	8.7937	9.67955	10.0258	10.6244	11.0144	11.9185	7.78433		7.51029	6.10243	7.0061	6.78294	6.0643	8.29114	4.47361	4.14182	9.21009	8.43772
8.95532	10.2102	10.1365	9.08199	9.62109	9.96199	10.7913	11.0653	11.8127	7.777		7.3927	6.15517	7.01769	6.67592	6.16823	8.16468	4.18628	4.09361	9.16219	8.42258
8.87398	10.2215	10.0797	8.95145	9.71728	10.0095	10.8058	11.0782	11.8533	7.94974		7.46541	6.1297	6.98104	6.66341	6.18294	8.13733	4.33293	4.08748	9.12499	8.43696
8.87579	10.2151	10.1593	8.98663	9.6975	10.0481	10.8045	11.0954	11.8772	7.96928		7.20318	6.18495	6.99239	6.62347	6.05377	8.15041	4.53119	4.13025	9.1846	8.50086
8.96443	10.2059	10.1627	9.0155	9.70663	9.9324	10.7517	11.0129	11.8614	8.22211		7.24962	6.17534	7.06757	6.73422	6.16637	8.20078	4.43596	4.07649	9.18081	8.48934
8.92554	10.2052	10.1409	8.93165	9.83725	10.1215	10.7629	11.0572	11.8315	7.80682		7.41033	6.24418	7.08054	6.71312	6.03566	8.11656	4.40187	4.10092	9.17809	8.4434
8.95297	10.3042	10.2278	8.86815	9.65503	9.99537	10.7722	11.1659	11.762	7.89914		7.30754	6.26206	6.96053	6.68839	6.13835	8.11453	4.44521	4.12696	9.16252	8.43488
8.97879	10.2414	10.1309	8.87038	9.67873	9.98202	10.5712	10.9744	11.7202	8.00413		7.55873	6.2638	6.96163	6.70453	6.13665	8.17921	4.39813	4.13245	9.18592	8.47701
8.93091	10.1518	10.103	9.04362	9.64419	9.97003	10.7144	11.0126	11.8739	7.96432		7.41169	6.31002	6.97243	6.5782	6.14452	8.15583	4.51284	4.14206	9.09824	8.45661
8.96152	10.0857	10.2147	8.98721	9.63802	9.90671	10.7114	11.0784	11.741	7.88238		7.48569	6.32793	6.91011	6.70622	6.08224	8.12448	4.33969	4.09843	9.11759	8.47388
8.90355	10.1723	10.1075	8.98423	9.54146	10.022	10.6854	11.0818	11.7332	7.6832		7.33615	6.33254	6.95014	6.70015	6.13662	8.1844	4.55394	4.13595	9.20665	8.48991
8.89308	10.1069	10.173	8.97575	9.71919	9.93778	10.8219	11.1217	11.8855	7.82578		7.42443	6.33871	7.0164	6.60179	6.0946	8.22147	4.54288	4.22535	9.18666	8.44797
8.91662	10.1297	10.1377	9.02884	9.72211	10.0883	10.6002	11.1513	11.8449	7.84456		7.28519	6.32611	7.05692	6.50675	6.11742	8.20534	4.327	4.1452	9.16377	8.48964
8.87952	10.2082	10.2124	9.13874	9.64525	10.0532	10.7007	11.127	11.8402	7.85676		7.51227	6.34081	6.98042	6.6791	6.0818	8.30274	4.49296	4.1585	9.1774	8.40632
8.94998	10.1597	10.2123	8.87342	9.71998	10.0716	10.7539	11.1105	11.8214	7.88943		7.35781	6.35334	7.03367	6.45689	6.06646	8.2224	4.47956	4.09636	9.14413	8.48907
8.93068	10.0433	10.0745	8.73296	9.55895	9.99453	10.5034	11.1562	11.8389	7.74405		7.41748	6.30202	6.95172	6.76799	6.08973	8.24352	4.2661	4.14225	9.22028	8.4694
8.92063	10.2284	10.175	8.94239	9.69786	9.98713	10.7466	11.0698	11.7877	7.89404		7.42186	6.31272	7.04637	6.5226	6.12558	8.24612	4.39282	4.13509	9.17412	8.46426
8.93291	10.2025	10.1014	8.90933	9.54883	9.96305	10.6166	11.1565	11.7842	7.7505		7.52355	6.27316	6.90067	6.60524	6.1456	8.40416	4.48891	4.19979	9.16326	8.45188
8.9223	10.2428	10.1444	8.98933	9.69691	9.91577	10.6231	11.2287	11.993	7.88881		7.53378	6.27871	7.01164	6.54827	6.05699	8.33312	4.53402	4.1483	9.18445	8.48092
8.8578	10.2593	10.1728	8.84449	9.65392	9.94341	10.423	11.2294	11.7544	7.97579		7.15172	6.30246	6.98092	6.59678	6.11622	8.4591	4.41312	4.12986	9.13235	8.45006
8.92321	10.3033	10.101	9.02939	9.60445	9.94352	10.5397	11.3073	11.9744	7.93895		7.19714	6.29167	6.95193	6.70545	6.12778	8.38264	4.46266	4.1108	9.21815	8.32772
8.98769	10.3229	10.0335	8.96528	9.52918	10.0014	10.4796	11.2099	11.9277	7.92235		7.44118	6.30334	7.0426	6.63111	6.1261	8.47663	4.4612	4.14627	9.1826	8.36861
8.91788	10.2541	10.1107	9.15803	9.65923	9.98021	10.4898	11.1324	11.7642	7.9647		7.3663	6.33652	6.98391	6.65029	6.13326	8.48373	4.54862	4.18334	9.18771	8.41924
8.92372	10.2942	10.1766	8.91505	9.55058	10.0358	10.4357	11.176	11.9192	7.84401		7.47225	6.37011	7.02336	6.76256	6.07091	8.33737	4.44936	4.17034	9.21436	8.43987
8.97773	10.3482	10.0847	8.85354	9.58543	9.98749	10.379	11.0501	12.0003	7.82862		7.34122	6.35499	6.93485	6.74162	6.13341	8.36885	4.31291	4.15327	9.23273	8.48358
8.95992	10.3425	10.0453	8.85974	9.57165	9.99985	10.4892	11.1948	11.8752	7.8503		7.42865	6.36374	6.91434	6.64764	6.0555	8.39052	4.36759	4.1748	9.23303	8.46961
8.91125	10.3068	10.0741	8.95487	9.59335	9.92934	10.3955	11.1845	12.0292	7.95198		7.30936	6.34637	7.00646	6.76383	6.10864	8.4495	4.29055	4.10916	9.22883	8.45495
8.9921	10.2726	10.122	8.89081	9.58259	9.85428	10.3016	11.0974	11.8868	7.67309		7.47862	6.36287	6.98123	6.6998	6.11805	8.49284	4.24156	4.14086	9.15228	8.41195
8.94315	10.3626	10.1637	9.06304	9.50737	9.84967	10.4184	11.1641	11.7764	7.70725		7.27456	6.37496	7.02779	6.77084	6.09673	8.47468	4.38932	4.14093	9.2443	8.47747
8.96319	10.3228	10.0871	9.18603	9.67668	10.0335	10.2863	11.1563	11.984	7.75988		7.30654	6.38459	7.00259	6.88843	6.11215	8.43639	4.37798	4.1703	9.19275	8.43229
8.90368	10.2576	10.1868	8.97579	9.61713	10.0326	10.4693	11.0381	11.7815	8.02578		7.27995	6.40228	7.01394	6.68319	6.03789	8.53778	4.38278	4.09962	9.19041	8.42296
9.01726	10.332	10.0834	8.88658	9.48428	9.86296	10.3146	11.1582	11.8204	7.7445		7.36184	6.38432	6.96558	6.80506	6.10315	8.50391	4.36705	4.14572	9.22006	8.45164
8.95688	10.2623	10.084	9.04096	9.63843	9.93179	10.5084	11.1975	11.8853	7.83101		7.40601	6.40799	6.97779	6.70297	6.11702	8.51476	4.48797	4.12032	9.19592	8.37682
8.89503	10.23	10.1256	8.88625	9.58804	9.96417	10.4015	11.1679	11.9631	7.67324		7.20276	6.42384	7.03078	6.7872	6.16714	8.48303	4.31039	4.1588	9.17219	8.41924
8.90226	10.2647	10.0239	8.97083	9.62243	9.8391	10.4507	11.0691	11.8699	8.05991		7.59649	6.41098	7.01884	6.75308	6.0895	8.50248	4.38427	4.14531	9.11419	8.40148
9.01158	10.2876	10.0657	8.90027	9.56454	9.89057	10.4629	11.1237	11.9133	7.8977		7.26664	6.42068	6.95598	6.74526	6.03189	8.4379	4.43715	4.11698	9.16007	8.39935
8.9852	10.3933	10.1064	9.09846	9.61012	9.90275	10.4537	11.0794	11.854	8.02392		7.23955	6.42056	7.0022	6.63276	6.07777	8.37039	4.3777	4.13431	9.15177	8.41061
8.97205	10.3014	10.1208	8.91633	9.52167	9.99117	10.4438	10.9391	11.8406	7.88693		7.31492	6.40682	6.93383	6.80618	6.10923	8.39321	4.50435	4.13026	9.17885	8.28833
8.95043	10.3649	10.1249	8.97743	9.60071	9.95068	10.446	11.1409	11.9759	7.84419		7.22307	6.39593	6.94085	6.79483	6.08657	8.33227	4.4893	4.14663	9.10941	8.34655
8.9288	10.3368	10.0381	8.75462	9.55936	9.96158	10.5091	11.0331	11.8609	7.66306		7.23047	6.41569	6.92291	6.64305	6.14589	8.2834	4.32719	4.07582	9.08894	8.29869
8.96556	10.3402	10.2097	8.90557	9.54202	9.91563	10.5037	11.132	11.8706	7.69487		7.14931	6.40795	6.94182	6.46466	6.0906	8.27702	4.43004	4.10084	9.12175	8.47455
8.9171	10.3332	10.1423	8.92957	9.57007	9.86284	10.4845	11.0859	11.8992	7.76841		7.28155	6.44259	6.94217	6.59713	6.01773	8.33604	4.39505	4.13383	9.12082	8.3458
8.94933	10.3264	10.109	8.98846	9.57554	9.98207	10.5776	11.0741	11.7698	7.85869		7.22141	6.41503	6.93452	6.76506	6.03028	8.19701	4.44436	4.09364	9.1272	8.59517
8.97402	10.3806	10.114	9.08393	9.58662	9.89372	10.49	11.0632	11.8462	7.85098		7.31079	6.42985	6.92692	6.79705	6.08574	8.18751	4.34017	4.14998	9.0325	8.47766
8.90607	10.3717	10.0696	9.04682	9.59295	9.88819	10.4619	11.0294	11.7988	7.71637		7.56792	6.43912	6.96412	6.7191	6.06949	8.14383	4.39476	4.15832	9.11393	8.45269
8.99279	10.2942	10.0988	9.01514	9.70474	9.90602	10.4359	11.0803	11.961	7.95542		7.32671	6.48478	6.93511	6.76026	6.06757	8.1593	4.4846	4.12349	9.08113	8.49076
8.88636	10.3551	10.1125	8.91579	9.59345	9.88131	10.3645	11.0752	11.9796	7.63523		7.47125	6.48422	6.91975	6.69054	6.06361	8.19098	4.29125	4.10468	9.04259	8.43452
8.9139	10.327	10.0957	8.90837	9.56024	9.85382	10.4017	10.964	11.7447	8.09216		7.23941	6.4908	6.90072	6.57481	6.00376	8.16331	4.24438	4.21176	9.15594	8.52288
8.99986	10.3169	10.0859	9.17658	9.5548	9.8376	10.3678	11.0831	11.8008	7.84963		7.2073	6.47346	6.94023	6.72622	6.11859	8.11669	4.43395	4.08299	9.16217	8.39218
8.91427	10.318	10.1433	9.12808	9.59912	9.90598	10.3866	11.0449	11.8308	7.72651		7.53274	6.46809	6.9812	6.75808	6.06408	8.10871	4.3925	4.16533	9.16046	8.58912
9.028	10.4081	10.1831	9.09453	9.6089	10.0048	10.39	11.0765	11.8462	7.77246		7.29726	6.47438	7.02694	6.7203	6.17274	8.23952	4.4084	4.15846	9.07794	8.55427
8.98873	10.3622	10.1411	9.08869	9.65359	9.9334	10.3047	11.0703	11.7737	7.99364		7.42117	6.45936	6.93297	6.60039	6.10714	8.24298	4.35865	4.11924	9.16502	8.3913
8.9667	10.3671	10.1095	9.01867	9.44414	10.0165	10.3311	11.0108	11.8052	7.7231		7.43902	6.46906	6.92375	6.71904	6.12377	8.17197	4.34838	4.10131	9.11342	8.51517
8.98997	10.3932	10.0625	9.13006	9.54198	9.87263	10.3323	11.1605	11.8026	7.62738		7.25452	6.44857	6.91454	6.65869	6.1114	8.17866	4.31176	4.09874	9.12097	8.5311
8.92099	10.3139	10.0382	9.06642	9.47831	9.93951	10.3408	11.0913	11.8527	7.6812		7.28613	6.41231	6.93046	6.72461	6.06843	8.13921	4.29705	4.05167	9.09645	8.51951
8.93362	10.3739	10.1389	8.88431	9.51976	9.96649	10.2183	11.1461	11.7947	7.76949		7.3391	6.41327	7.06972	6.67054	6.0526	8.23562	4.38225	4.10737	9.01795	8.49148
8.99101	10.3261	10.1341	9.13888	9.64086	9.83073	10.3429	11.0194	11.9086	7.64357		7.39379	6.44254	6.9703	6.66661	6.14982	8.19236	4.45049	4.10834	9.08701	8.36617
8.98106	10.3042	10.0658	9.14361	9.54643	9.91902	10.3157	11.0805	11.9779	7.56952		7.37209	6.44386	6.82596	6.71979	6.09318	8.19484	4.19064	4.12301	9.11664	8.58589
8.89016	10.3498	10.0936	9.10793	9.44635	9.85354	10.1512	11.1644	11.8041	7.50928		7.32673	6.49536	7.01156	6.59044	6.09535	8.34668	4.35818	4.10877	9.1793	8.59
8.93845	10.43	10.0891	9.00589	9.42395	9.83893	10.3457	11.1879	11.8507	7.64314		7.42537	6.49228	6.85866	6.72007	6.01822	8.41639	4.38487	4.08578	9.14657	8.406
8.937	10.3384	10.1245	8.89182	9.63876	9.86463	10.2609	11.1506	11.8408	7.83854		7.42731	6.51431	7.00187	6.70142	6.02242	8.25079	4.28475	4.13063	9.07024	8.52173
8.91132	10.4235	10.0104	9.06992	9.59008	9.95747	10.1006	11.1142	11.8117	7.43172		7.20203	6.50526	6.97366	6.63726	6.03572	8.32828	4.2759	4.15576	9.07038	8.51412
8.97492	10.4489	9.99308	8.94162	9.5002	9.9374	10.2679	11.0588	11.7352	7.8239		7.3757	6.53302	6.88678	6.7273	6.03695	8.42153	4.37975	4.09963	9.06597	8.36363
