# Supplementary material for: UBR-1 deficiency leads to ivermectin resistance in Caenorhabditis elegans
Source: eLife journal article supplement (doi:10.7554/elife.103718), 2024-12-13
Supplement: data1 [file Figure 5-source data 8(I).xlsx]

## Sheet: Sheet1
	5-HT											5-HT+IVM
WT	11.5428	10.1923	10.8885	12.9423	9.39383	9.80594	11.6363	9.05626	9.51134	14.3379		1.12658	1.13242	1.05368	1.20011	1.28316	1.11768	2.50472	1.11384	1.14021	1.08253
ubr-1	10.803	10.3259	9.2103	9.18125	11.074	13.1417	8.74749	13.1856	9.21212	13.0381		8.51131	8.63845	8.06272	11.6872	11.1504	7.24099	9.11449	8.36464	8.79057	6.51784
ubr-1;UBR-1	12.5993	9.95575	9.93304	9.29079	10.0283	11.3019	10.206	10.0409	11.6626	11.5405		1.28146	5.23386	1.42681	1.20407	1.30495	5.39781	5.64815	1.88493	1.06722	1.43955
ubr-1;got-1	11.7673	11.0164	8.3234	12.9985	10.3541	8.16854	11.0417	9.80458	10.4903	14.08		1.25325	6.2152	1.73541	5.50141	6.58897	1.18446	1.98497	7.52306	6.74453	5.34026
ubr-1;eat-4	12.071	10.4467	10.1208	9.79752	11.9874	9.42852	9.54861	13.259	11.0032	9.5963		4.01162	2.98934	7.00736	7.20294	1.13794	1.15659	1.24377	5.0198	1.1771	1.39007
ubr-1+Cef	11.0728	12.7698	11.3794	10.5781	11.714	11.4923	9.95385	9.77728	11.9461	9.45275		7.01559	3.82288	7.6596	6.66383	5.3039	6.18519	3.02301	4.45371	4.94256	5.28892
WT+Glu	12.5227	10.7662	11.2516	9.41955	10.4881	10.2809	13.9953	11.5637	12.1045	10.6847		7.97292	6.64285	7.19277	7.15346	7.13582	8.74075	8.80249	5.91486	5.24956	9.45863
