# Supplementary material for: UBR-1 deficiency leads to ivermectin resistance in Caenorhabditis elegans
Source: eLife. 2025 Apr 1;13:RP103718. doi: 10.7554/eLife.103718 (PMC11961118; doi:10.7554/eLife.103718)
Supplement: Supplementary file 3. [file elife-103718-supp3.xlsx]

## Sheet: Supplementary File 3
Sequence of primers used in this study.
Promoters	Forward primers	Reverse primers
Pmyo-2	CTCCAGTGACTATCCAAATAAG	TTCTGTGTCTGACGATCGAGGG
Pubr-1	CACCAGAATTTCCAAAGATTCC	TCCATTAGTCGAACTGAAATCG
Pgot-1.2	ACGTGCCAGACAATATGAAACA	GTTGAGTGTTGTTTCTGGAATT
Peat-4	AAATGACGTTCAGAATAA	GGTTTCTGAAAATGATGAT
Pavr-15	GACTGTACGAGTGATTCATTTC	TTGTATCGTTGTTTTCAAAACC
Pavr-14	TTGAATGTCGATCATACTCGTG	CTGAAAGTTTGTTTTATAAAAC
Pglc-1	CCAGTCATTTTGTTTTAAATTC	TGCCGAAGCAAAAATATATAAT
Prgef-1	CGTTTCCGATACCCCCTTAT	CGTCGTCGTCGTCGATGCC
Pmyo-3	AATTCAAAAGGGTCTGGCCG	TCTAGATGGATCTAGTGGTC
got-1.2(DNA)	ATGTCCTTCTTTGACGGAATCC	TTAGATGTTGCTCTTCACGGCA
eat-4(DNA)	ATGTCGTCATGGAACGAGGCTT	CTACCACTGCTGATAATGCGGA
ubr-1(RNAi, sense)	TTCGACTAATGGAATGAT	GTTGGTTTAAAATTTCGA
ubr-1(RNAi, antisense)	GTTGGTTTAAAATTTCGA	TTCGACTAATGGAATGAT
avr-15(DNA)	ATGTCTACCTCATTTATCAGAA	TTACGTACTGATGGCCACACCG
avr-14(DNA)	ATGTGGCATTATCGACTGACGA	TTAATCACGGCTCTGTTTCACA
glc-1(DNA)	ATGGCTACCTGGATTGTCGGAA	CTAAAATAATACGTTCTGCTGG
